# Supplementary material for: Deciphering Microbiome, Transcriptome, and Metabolic Interactions in the Presence of Probiotic Lactobacillus acidophilus against Salmonella Typhimurium in a Murine Model
Source: Antibiotics (Basel). 2024 Apr 11;13(4):352. doi: 10.3390/antibiotics13040352 (PMC11047355; doi:10.3390/antibiotics13040352)
Supplement: Supplementary file 1 [file antibiotics-13-00352-s001.zip]

Archive with 6 entries (6 files):
- Supplementary File S1.pdf
- Table Supplementary S4..xlsx
- Table Supplementary S5..xlsx
- Table Supplementary S6..xlsx
- Table supplementary S7.xlsx
- Table Supplementary S8.xlsx
