# Supplementary material for: Deciphering Microbiome, Transcriptome, and Metabolic Interactions in the Presence of Probiotic Lactobacillus acidophilus against Salmonella Typhimurium in a Murine Model
Source: Antibiotics (Basel). 2024 Apr 11;13(4):352. doi: 10.3390/antibiotics13040352 (PMC11047355; doi:10.3390/antibiotics13040352)
Supplement: Supplementary file 1 [file antibiotics-13-00352-s001.zip › Table Supplementary S4..xlsx]

## Sheet: Sheet2
Table S4. Descriptive statistical analysis of RNA-seq data
Samples	Reads (Raw)	Reads (Clean)	Bases (Raw)	Bases (Clean)	Q20(%)	Q30(%)	GC contents (%)
CNG-1	10296754	9533459	1.54	1.38	98.5	94.34	44.74
CNG-2	11092876	10181614	1.66	1.45	98.6	94.73	43.46
CNG-3	11607587	10387365	1.74	1.46	98.71	95.06	45.45
CPG-1	9634859	8829648	1.45	1.29	98.16	93.41	43.92
CPG-2	9276653	8663884	1.39	1.25	98.2	93.41	38.53
CPG-3	9138136	8484739	1.37	1.24	98.27	93.83	40.95
LAST-1	14300455	12723830	2.15	1.82	98.02	93.03	48.9										Samples	Reads (Raw)	Reads (Clean)	Bases (Raw)	Bases (Clean)	Q20(%)	Q30(%)	GC contents (%)
LAST-2	9221561	7889740	1.38	1.11	98.24	94.02	49.44										CNG-1	10296754	9533459	1.54	1.38	98.5	94.34	44.74
LAST-3	9441264	8513577	1.42	1.21	98.41	94.22	43.85										CNG-2	11092876	10181614	1.66	1.45	98.6	94.73	43.46
SUM + Average	94010145	85207856	14.1	12.21	98.3456	94.0056	44.36										CNG-3	11607587	10387365	1.74	1.46	98.71	95.06	45.45
																	CPG-1	9634859	8829648	1.45	1.29	98.16	93.41	43.92
Note: The numbers highlighted with yellow indicates sum of the total numbers while the purple indicates average.																	CPG-2	9276653	8663884	1.39	1.25	98.2	93.41	38.53
																	CPG-3	9138136	8484739	1.37	1.24	98.27	93.83	40.95
																	LAG-1	9530176	8620222	1.43	1.21	98.39	94.23	41.74
																	LAG-2	14474141	12390103	2.17	1.72	98.56	94.54	44.08
																	LAG-3	11575770	10527037	1.74	1.51	98.55	94.55	44.24
																	LAST-1	14300455	12723830	2.15	1.82	98.02	93.03	48.9
																	LAST-2	9221561	7889740	1.38	1.11	98.24	94.02	49.44
																	LAST-3	9441264	8513577	1.42	1.21	98.41	94.22	43.85
