# Supplementary material for: Deciphering Microbiome, Transcriptome, and Metabolic Interactions in the Presence of Probiotic Lactobacillus acidophilus against Salmonella Typhimurium in a Murine Model
Source: Antibiotics (Basel). 2024 Apr 11;13(4):352. doi: 10.3390/antibiotics13040352 (PMC11047355; doi:10.3390/antibiotics13040352)
Supplement: Supplementary file 1 [file antibiotics-13-00352-s001.zip › Table Supplementary S5..xlsx]

## Sheet: LAST VS CPG.
Table S5. Showing important up and down regulated genes related to immunity, metabolism, cell regulation and tight junctions.
Gene	logCPM	log2FC	pvalue	FDR	significant	Name	Description
Ccnd1	7.37613	13.1952	1.77e-14	3.88e-10	yes	Ccnd1	cyclin D1
Adcy6	5.05547	11.4402	3.98e-07	0.00437316	yes	Adcy6	adenylate cyclase 6
Ncln	6.64019	5.61022	4.34e-06	0.0317747	yes	Ncln	nicalin
Cpt2	5.01932	8.55649	7.66e-06	0.0392355	yes	Cpt2	carnitine palmitoyltransferase 2
Ap4s1	5.32179	7.54784	9.82e-06	0.0392355	yes	Ap4s1	adaptor-related protein complex AP-4, sigma 1
Rtn4ip1	4.96161	8.34655	1.36e-05	0.0392355	yes	Rtn4ip1	reticulon 4 interacting protein 1
Tmsb4x	7.31824	-4.65114	1.4e-05	0.0392355	yes	Tmsb4x	thymosin, beta 4, X chromosome
Lypd8	5.31849	7.38536	1.43e-05	0.0392355	yes	Lypd8	LY6/PLAUR domain containing 8
Hmga1b	4.49298	10.2797	2.26e-05	0.0524914	yes	Hmga1b	high mobility group AT-hook 1B
Elovl6	4.82378	9.5697	2.39e-05	0.0524914	yes	Elovl6	ELOVL family member 6, elongation of long chain fatty acids (yeast)
Ank	4.51259	9.99929	2.68e-05	0.0534087	yes	Ank	progressive ankylosis
Ywhah	4.35218	10.1483	3.36e-05	0.0574705	yes	Ywhah	tyrosine 3-monooxygenase/tryptophan 5-monooxygenase activation protein, eta polypeptide
Parva	4.50876	9.81595	3.57e-05	0.0574705	yes	Parva	parvin, alpha
Slc2a4	4.11844	10.5727	3.66e-05	0.0574705	yes	Slc2a4	solute carrier family 2 (facilitated glucose transporter), member 4
Kdm3b	4.35161	9.97274	4.36e-05	0.0637894	yes	Kdm3b	KDM3B lysine (K)-specific demethylase 3B
Gm29717	4.7944	7.57365	4.91e-05	0.0674438	yes	Gm29717	predicted gene, 29717
H2ac23	3.32347	12.0762	5.31e-05	0.0686149	yes	H2ac23	H2A clustered histone 23
Golm1	4.34687	9.63877	7.15e-05	0.083094	yes	Golm1	golgi membrane protein 1
Hbb-bs	3.96265	10.3864	7.19e-05	0.083094	yes	Hbb-bs	hemoglobin, beta adult s chain
Rad54l2	4.01287	10.2059	7.87e-05	0.0863823	yes	Rad54l2	RAD54 like 2 (S. cerevisiae)
Gdpd5	4.01998	10.1006	8.85e-05	0.0925158	yes	Gdpd5	glycerophosphodiester phosphodiesterase domain containing 5
Prss8	3.90699	9.05509	0.000105735	0.105533	yes	Prss8	protease, serine 8 (prostasin)
Mtch2	4.51867	7.7548	0.000119965	0.109992	yes	Mtch2	mitochondrial carrier 2
Nit1	4.33045	9.30577	0.000120598	0.109992	yes	Nit1	nitrilase 1
Rnf213	4.22306	9.46424	0.00012523	0.109992	yes	Rnf213	ring finger protein 213
Agpat4	4.08261	9.61006	0.000144324	0.121887	yes	Agpat4	1-acylglycerol-3-phosphate O-acyltransferase 4 (lysophosphatidic acid acyltransferase, delta)
Gm40811	3.69864	10.2495	0.000156986	0.123296	yes	Gm40811	predicted gene, 40811
Vps8	3.54206	10.5327	0.000161634	0.123296	yes	Vps8	VPS8 CORVET complex subunit
Pgam1	4.39208	7.75641	0.000164228	0.123296	yes	Pgam1	phosphoglycerate mutase 1
Tomm20	3.90676	9.75656	0.000177401	0.123296	yes	Tomm20	translocase of outer mitochondrial membrane 20
Fbxo31	3.5371	10.448	0.000179261	0.123296	yes	Fbxo31	F-box protein 31
Phf8	3.47424	10.5706	0.000179683	0.123296	yes	Phf8	PHD finger protein 8
Atat1	3.83254	9.83308	0.000190556	0.124099	yes	Atat1	alpha tubulin acetyltransferase 1
Lamtor5	3.91964	9.66514	0.000193259	0.124099	yes	Lamtor5	late endosomal/lysosomal adaptor, MAPK and MTOR activator 5
Cd9	3.65658	10.1086	0.00020258	0.124099	yes	Cd9	CD9 antigen
Prdx6b	3.59426	10.2218	0.00020346	0.124099	yes	Prdx6b	peroxiredoxin 6B
Col18a1	3.24866	10.8221	0.000220647	0.130945	yes	Col18a1	collagen, type XVIII, alpha 1
Krt19	10.1218	2.7651	0.000234904	0.134057	yes	Krt19	keratin 19
Gaa	3.7807	9.73801	0.000238425	0.134057	yes	Gaa	glucosidase, alpha, acid
Nudt1	4.47432	7.35206	0.000246052	0.134057	yes	Nudt1	nudix hydrolase 1
Igfbp7	4.89209	6.79487	0.000250587	0.134057	yes	Igfbp7	insulin-like growth factor binding protein 7
Zfp282	3.98419	9.33245	0.000256417	0.134057	yes	Zfp282	zinc finger protein 282
Smpd3	4.69278	6.65789	0.00028826	0.1472	yes	Smpd3	sphingomyelin phosphodiesterase 3, neutral
Cyp4f40	3.69655	9.69323	0.000298864	0.149147	yes	Cyp4f40	cytochrome P450, family 4, subfamily f, polypeptide 40
Hspa5	3.74727	9.55984	0.000318249	0.150423	yes	Hspa5	heat shock protein 5
Arl6ip1	3.60109	9.78267	0.000327103	0.150423	yes	Arl6ip1	ADP-ribosylation factor-like 6 interacting protein 1
Mtfp1	4.65004	6.40634	0.000329489	0.150423	yes	Mtfp1	mitochondrial fission process 1
Zfp993	3.45758	10.0239	0.00033274	0.150423	yes	Zfp993	zinc finger protein 993
Cox7a1	8.60029	3.1321	0.000335908	0.150423	yes	Cox7a1	cytochrome c oxidase subunit 7A1
Uck2	4.29379	7.44131	0.000342525	0.150423	yes	Uck2	uridine-cytidine kinase 2
Edem1	4.04478	8.98075	0.000354467	0.152615	yes	Edem1	ER degradation enhancer, mannosidase alpha-like 1
Aimp2	4.22353	7.48755	0.000368116	0.153791	yes	Aimp2	aminoacyl tRNA synthetase complex-interacting multifunctional protein 2
Miga2	4.67942	6.29223	0.000371204	0.153791	yes	Miga2	mitoguardin 2
Fgf1	3.75506	8.24571	0.000398356	0.156439	yes	Fgf1	fibroblast growth factor 1
Tnfsf13os	3.9849	8.98114	0.00039874	0.156439	yes	Tnfsf13os	tumor necrosis factor (ligand) superfamily, member 13, opposite strand
Nkx6-3	2.86847	10.9172	0.00039897	0.156439	yes	Nkx6-3	NK6 homeobox 3
Duox2	3.71804	9.37194	0.00041583	0.16019	yes	Duox2	dual oxidase 2
Dclk2	2.64773	-10.645	0.000475761	0.177558	yes	Dclk2	doublecortin-like kinase 2
Trappc12	3.5053	9.59054	0.000486971	0.177558	yes	Trappc12	trafficking protein particle complex 12
Pcbd2	4.14862	7.42065	0.000492029	0.177558	yes	Pcbd2	pterin 4 alpha carbinolamine dehydratase/dimerization cofactor of hepatocyte nuclear factor 1 alpha (TCF1) 2
Prodh	3.47405	9.62739	0.000493261	0.177558	yes	Prodh	proline dehydrogenase
Nop2	3.50808	9.51691	0.000524478	0.183245	yes	Nop2	NOP2 nucleolar protein
Cavin2	3.12358	10.1493	0.000533096	0.183245	yes	Cavin2	caveolae associated 2
Snph	3.38499	9.69991	0.000535192	0.183245	yes	Snph	syntaphilin
Gm47761	3.81706	8.96876	0.000555305	0.183245	yes	Gm47761	predicted gene, 47761
Nr3c2	3.65652	9.20257	0.000565457	0.183245	yes	Nr3c2	nuclear receptor subfamily 3, group C, member 2
Srsf6	3.63263	9.2361	0.000568605	0.183245	yes	Srsf6	serine and arginine-rich splicing factor 6
Pdx1	2.61593	10.9489	0.000573597	0.183245	yes	Pdx1	pancreatic and duodenal homeobox 1
Hacd2	3.47818	9.46639	0.000581149	0.183245	yes	Hacd2	3-hydroxyacyl-CoA dehydratase 2
Nme6	3.11744	10.0562	0.000587626	0.183245	yes	Nme6	NME/NM23 nucleoside diphosphate kinase 6
Wdr44	3.06889	-9.64708	0.000600443	0.183245	yes	Wdr44	WD repeat domain 44
Med9	3.55512	9.31073	0.000602178	0.183245	yes	Med9	mediator complex subunit 9
Inpp5j	3.49995	9.38439	0.000611782	0.183245	yes	Inpp5j	inositol polyphosphate 5-phosphatase J
Pdzd11	3.67055	9.10087	0.000619346	0.183245	yes	Pdzd11	PDZ domain containing 11
Ckap2l	3.55506	9.27308	0.00063132	0.183245	yes	Ckap2l	cytoskeleton associated protein 2-like
Ctu1	2.27107	-10.8706	0.000656726	0.183245	yes	Ctu1	cytosolic thiouridylase subunit 1
Leo1	3.71326	8.98523	0.000656918	0.183245	yes	Leo1	Leo1, Paf1/RNA polymerase II complex component
Wnt5a	2.87999	10.3282	0.000657154	0.183245	yes	Wnt5a	wingless-type MMTV integration site family, member 5A
Prss32	7.74993	3.24476	0.00067457	0.183245	yes	Prss32	protease, serine 32
Acp6	3.49731	9.28702	0.000681175	0.183245	yes	Acp6	acid phosphatase 6, lysophosphatidic
Gas2l3	3.31788	9.5752	0.000683693	0.183245	yes	Gas2l3	growth arrest-specific 2 like 3
Gstm2	4.48514	6.16286	0.00069217	0.183245	yes	Gstm2	glutathione S-transferase, mu 2
Rnf128	2.9822	10.0989	0.000692878	0.183245	yes	Rnf128	ring finger protein 128
Aff4	3.24514	9.66726	0.000701002	0.183245	yes	Aff4	AF4/FMR2 family, member 4
Acot7	4.60545	6.0538	0.000725706	0.185755	yes	Acot7	acyl-CoA thioesterase 7
2310016G11Rik	3.4934	9.23203	0.000727522	0.185755	yes	2310016G11Rik	RIKEN cDNA 2310016G11 gene
Ifitm2	3.43677	9.30112	0.000744781	0.186832	yes	Ifitm2	interferon induced transmembrane protein 2
Nasp	3.74003	7.73056	0.0007563	0.186832	yes	Nasp	nuclear autoantigenic sperm protein (histone-binding)
Iglc2	2.08168	-10.9856	0.000763033	0.186832	yes	Iglc2	immunoglobulin lambda constant 2
Cdcp1	3.77483	7.64709	0.000777669	0.186832	yes	Cdcp1	CUB domain containing protein 1
Sis	3.30139	9.46205	0.000784735	0.186832	yes	Sis	sucrase isomaltase (alpha-glucosidase)
Gchfr	3.66537	8.89703	0.000787238	0.186832	yes	Gchfr	GTP cyclohydrolase I feedback regulator
Bcl2l15	6.87867	3.58868	0.000791302	0.186832	yes	Bcl2l15	BCLl2-like 15
Poldip2	3.48812	9.14871	0.000802918	0.187558	yes	Poldip2	polymerase (DNA-directed), delta interacting protein 2
Ghitm	4.3517	6.71522	0.000833374	0.192593	yes	Ghitm	growth hormone inducible transmembrane protein
Lrrc20	3.28763	9.41005	0.000847541	0.192593	yes	Lrrc20	leucine rich repeat containing 20
Pgap3	3.33812	9.32238	0.000855633	0.192593	yes	Pgap3	post-GPI attachment to proteins 3
Tab1	5.24686	4.86195	0.000859556	0.192593	yes	Tab1	TGF-beta activated kinase 1/MAP3K7 binding protein 1
Rph3al	3.00071	9.81321	0.000881655	0.194355	yes	Rph3al	rabphilin 3A-like (without C2 domains)
Pdhx	4.16795	6.95876	0.000885123	0.194355	yes	Pdhx	pyruvate dehydrogenase complex, component X
Adck2	3.50528	9.008	0.000908514	0.196159	yes	Adck2	aarF domain containing kinase 2
Gm31365	3.37596	9.17988	0.000936783	0.196159	yes	Gm31365	predicted gene, 31365
Cmtr1	4.90003	5.28517	0.000946553	0.196159	yes	Cmtr1	cap methyltransferase 1
Frat1	2.8463	9.96014	0.00095709	0.196159	yes	Frat1	frequently rearranged in advanced T cell lymphomas
Gm42081	4.63803	-5.44696	0.000958917	0.196159	yes	Gm42081	predicted gene, 42081
Egr1	5.54543	4.49741	0.000960085	0.196159	yes	Egr1	early growth response 1
Marcks	2.71663	10.1443	0.000976135	0.196159	yes	Marcks	myristoylated alanine rich protein kinase C substrate
Batf	2.66585	10.2009	0.000995464	0.196159	yes	Batf	basic leucine zipper transcription factor, ATF-like
Kcnq1	3.91891	6.95212	0.00100204	0.196159	yes	Kcnq1	potassium voltage-gated channel, subfamily Q, member 1
Cldn3	7.82712	3.09602	0.00101044	0.196159	yes	Cldn3	claudin 3
Oat	6.19021	3.91328	0.00104484	0.196159	yes	Oat	ornithine aminotransferase
Yju2b	3.38017	8.03278	0.00106574	0.196159	yes	Yju2b	YJU2 splicing factor homolog B
Galnt1	3.65231	8.64845	0.00106698	0.196159	yes	Galnt1	polypeptide N-acetylgalactosaminyltransferase 1
C030013C21Rik	3.26128	9.21707	0.00106919	0.196159	yes	C030013C21Rik	RIKEN cDNA C030013C21 gene
Srsf7	3.80801	8.43123	0.00107608	0.196159	yes	Srsf7	serine and arginine-rich splicing factor 7
Atp5g1	7.87695	3.05049	0.00108807	0.196159	yes	Atp5g1	ATP synthase, H+ transporting, mitochondrial F0 complex, subunit C1 (subunit 9)
Tmbim4	3.24774	9.21684	0.00108953	0.196159	yes	Tmbim4	transmembrane BAX inhibitor motif containing 4
Gm26588	3.2188	9.25948	0.00109499	0.196159	yes	Gm26588	predicted gene, 26588
Snx3	3.07066	9.47011	0.0010957	0.196159	yes	Snx3	sorting nexin 3
Gm36722	1.81107	-10.8523	0.00111494	0.196159	yes	Gm36722	predicted gene, 36722
Mtus2	3.23417	9.21238	0.00112406	0.196159	yes	Mtus2	microtubule associated tumor suppressor candidate 2
Myh10	2.77483	9.87053	0.00114326	0.196159	yes	Myh10	myosin, heavy polypeptide 10, non-muscle
1110004F10Rik	3.95708	6.68216	0.00114382	0.196159	yes	1110004F10Rik	RIKEN cDNA 1110004F10 gene
Ces1e	2.90603	9.66692	0.00114866	0.196159	yes	Ces1e	carboxylesterase 1E
Ctc1	3.06957	9.4245	0.00115062	0.196159	yes	Ctc1	CTS telomere maintenance complex component 1
Itga8	2.24662	10.6306	0.0011573	0.196159	yes	Itga8	integrin alpha 8
Hycc2	2.82892	-9.30304	0.00116056	0.196159	yes	Hycc2	hyccin PI4KA lipid kinase complex subunit 2
Cyp4v3	2.9369	9.5854	0.00118218	0.196159	yes	Cyp4v3	cytochrome P450, family 4, subfamily v, polypeptide 3
Cdc25a	4.95304	5.28694	0.00118558	0.196159	yes	Cdc25a	cell division cycle 25A
Gkn3	2.01187	10.918	0.00121872	0.196159	yes	Gkn3	gastrokine 3
Katna1	2.23767	-10.1076	0.00121985	0.196159	yes	Katna1	katanin p60 (ATPase-containing) subunit A1
Kcnj6	7.57148	-3.12767	0.00122464	0.196159	yes	Kcnj6	potassium inwardly-rectifying channel, subfamily J, member 6
Rnf34	2.228	-10.1126	0.00122802	0.196159	yes	Rnf34	ring finger protein 34
Kat2a	3.61797	8.57248	0.00122874	0.196159	yes	Kat2a	K(lysine) acetyltransferase 2A
Atg2b	3.90963	8.17015	0.00124863	0.196159	yes	Atg2b	autophagy related 2B
Hspa14	3.14687	9.22515	0.00125016	0.196159	yes	Hspa14	heat shock protein 14
Ampd2	3.51443	8.69451	0.00125772	0.196159	yes	Ampd2	adenosine monophosphate deaminase 2
Ctnnb1	3.7197	8.40418	0.00126536	0.196159	yes	Ctnnb1	catenin (cadherin associated protein), beta 1
Ddx3x	3.36145	8.90259	0.00126954	0.196159	yes	Ddx3x	DEAD box helicase 3, X-linked
Dab1	3.76972	8.33568	0.00127006	0.196159	yes	Dab1	disabled 1
Gm52132	2.77283	9.75253	0.00127051	0.196159	yes	Gm52132	predicted gene, 52132
Arg2	2.99561	9.42041	0.00127108	0.196159	yes	Arg2	arginase type II
Lrp4	3.08535	9.28156	0.00128414	0.196159	yes	Lrp4	low density lipoprotein receptor-related protein 4
Aqp11	2.94837	9.47554	0.00128781	0.196159	yes	Aqp11	aquaporin 11
Coa6	3.24654	9.04668	0.00129534	0.196159	yes	Coa6	cytochrome c oxidase assembly factor 6
Pomt2	2.95562	9.42519	0.00134118	0.200575	yes	Pomt2	protein-O-mannosyltransferase 2
Slc28a2	5.45193	-4.35671	0.00135532	0.200575	yes	Slc28a2	solute carrier family 28 (sodium-coupled nucleoside transporter), member 2
Taf5l	4.29553	6.03006	0.00135738	0.200575	yes	Taf5l	TATA-box binding protein associated factor 5 like
Gfod2	3.26904	8.95641	0.0013797	0.200575	yes	Gfod2	glucose-fructose oxidoreductase domain containing 2
Ncald	3.51874	8.60691	0.00137976	0.200575	yes	Ncald	neurocalcin delta
Gm40814	1.75638	-10.5915	0.0013936	0.200575	yes	Gm40814	predicted gene, 40814
Fmc1	5.61837	4.20451	0.00141275	0.200575	yes	Fmc1	formation of mitochondrial complex V assembly factor 1
Mmp2	2.38523	-9.71015	0.00141898	0.200575	yes	Mmp2	matrix metallopeptidase 2
Cyfip1	4.70229	5.43903	0.0014347	0.200575	yes	Cyfip1	cytoplasmic FMR1 interacting protein 1
Mecr	3.98966	6.42937	0.00144944	0.200575	yes	Mecr	mitochondrial trans-2-enoyl-CoA reductase
Ipo11-lrrc70	3.03016	9.22629	0.00146037	0.200575	yes	Ipo11-lrrc70	Ipo11-lrrc70 readthrough
Zc3h12a	2.74579	9.62122	0.00147325	0.200575	yes	Zc3h12a	zinc finger CCCH type containing 12A
Sirt3	3.17509	9.01593	0.00147837	0.200575	yes	Sirt3	sirtuin 3
Mt2	7.40596	3.12875	0.00148165	0.200575	yes	Mt2	metallothionein 2
Cd320	2.40064	10.0935	0.00148465	0.200575	yes	Cd320	CD320 antigen
Crispld2	3.59841	7.37217	0.00148923	0.200575	yes	Crispld2	cysteine-rich secretory protein LCCL domain containing 2
Kcnk3	3.10685	9.08939	0.0014997	0.200575	yes	Kcnk3	potassium channel, subfamily K, member 3
Macrod1	3.04565	9.16907	0.00150482	0.200575	yes	Macrod1	mono-ADP ribosylhydrolase 1
Iglc3	1.63719	-10.6138	0.00150708	0.200575	yes	Iglc3	immunoglobulin lambda constant 3
Git2	2.91608	9.34798	0.00150719	0.200575	yes	Git2	GIT ArfGAP 2
Gm16867	2.57324	9.83108	0.00153047	0.202446	yes	Gm16867	predicted gene, 16867
Eppk1	3.32965	8.75279	0.00154823	0.20246	yes	Eppk1	epiplakin 1
Cd177	2.44119	9.98718	0.00154923	0.20246	yes	Cd177	CD177 antigen
D030028A08Rik	2.97092	9.23637	0.00156437	0.20246	yes	D030028A08Rik	RIKEN cDNA D030028A08 gene
Timm8b	6.00036	3.85391	0.00156779	0.20246	yes	Timm8b	translocase of inner mitochondrial membrane 8B
Gm12816	6.8202	-3.3556	0.00157668	0.20246	yes	Gm12816	predicted gene 12816
Rsph3b	2.93234	9.26562	0.00160192	0.20436	yes	Rsph3b	radial spoke 3B homolog (Chlamydomonas)
Gna11	9.90555	2.37985	0.00161009	0.20436	yes	Gna11	guanine nucleotide binding protein, alpha 11
Bltp1	2.84929	9.34428	0.00164879	0.2069	yes	Bltp1	bridge-like lipid transfer protein family member 1
Kptn	3.17872	8.89097	0.00165817	0.2069	yes	Kptn	kaptin
Wipf1	3.15854	8.91879	0.00165836	0.2069	yes	Wipf1	WAS/WASL interacting protein family, member 1
Hk1	3.3478	8.65154	0.00167424	0.207576	yes	Hk1	hexokinase 1
Prdx1	2.82453	9.35053	0.00168269	0.207576	yes	Prdx1	peroxiredoxin 1
Gm34624	2.27517	10.089	0.00169654	0.208115	yes	Gm34624	predicted gene, 34624
Trap1	4.2199	5.85111	0.00171065	0.208561	yes	Trap1	TNF receptor-associated protein 1
E130308A19Rik	2.8915	9.23538	0.00171917	0.208561	yes	E130308A19Rik	RIKEN cDNA E130308A19 gene
Lmbr1	2.93691	9.17051	0.00173421	0.209229	yes	Lmbr1	limb region 1
Nkx6-2	3.75154	8.15924	0.00174939	0.209908	yes	Nkx6-2	NK6 homeobox 2
Sord	2.85754	9.25504	0.00176015	0.209978	yes	Sord	sorbitol dehydrogenase
Rab1a	3.14545	8.86455	0.00177319	0.209978	yes	Rab1a	RAB1A, member RAS oncogene family
Paqr4	5.80209	3.9426	0.0017853	0.209978	yes	Paqr4	progestin and adipoQ receptor family member IV
Lpcat3	7.45621	3.05083	0.00178831	0.209978	yes	Lpcat3	lysophosphatidylcholine acyltransferase 3
Copg2	2.98987	9.05595	0.00179859	0.209978	yes	Copg2	coatomer protein complex, subunit gamma 2
Prph	2.75323	9.37334	0.00180735	0.209978	yes	Prph	peripherin
Glyctk	3.04031	8.95475	0.00185166	0.213217	yes	Glyctk	glycerate kinase
Wtip	2.34686	9.88147	0.00185562	0.213217	yes	Wtip	WT1 interacting protein
Sst	3.9765	6.36759	0.00186679	0.213217	yes	Sst	somatostatin
Gm35591	2.68693	9.42141	0.00187816	0.213217	yes	Gm35591	predicted gene, 35591
Letmd1	2.7219	9.36458	0.00188865	0.213217	yes	Letmd1	LETM1 domain containing 1
5730507C01Rik	2.93422	9.07133	0.00189349	0.213217	yes	5730507C01Rik	RIKEN cDNA 5730507C01 gene
Car4	7.60266	2.96765	0.0019342	0.215931	yes	Car4	carbonic anhydrase 4
Ptrhd1	3.42307	8.41144	0.00193726	0.215931	yes	Ptrhd1	peptidyl-tRNA hydrolase domain containing 1
Aurka	2.90268	9.05329	0.00199719	0.221145	yes	Aurka	aurora kinase A
Saal1	1.62856	-10.1841	0.00202112	0.221145	yes	Saal1	serum amyloid A-like 1
Gm31623	2.76764	9.21847	0.00202681	0.221145	yes	Gm31623	predicted gene, 31623
Gstp1	5.60377	4.02082	0.00202925	0.221145	yes	Gstp1	glutathione S-transferase, pi 1
Stx6	2.79777	9.17777	0.0020344	0.221145	yes	Stx6	syntaxin 6
Impa1	3.11335	8.73927	0.00208748	0.225797	yes	Impa1	inositol (myo)-1(or 4)-monophosphatase 1
Hgfac	2.49337	9.54058	0.00209868	0.225896	yes	Hgfac	hepatocyte growth factor activator
Zfp955b	2.33853	9.7232	0.00211687	0.226743	yes	Zfp955b	zinc finger protein 955B
Gm53915	2.70745	9.24535	0.00213685	0.227772	yes	Gm53915	predicted gene, 53915
Dynlt1c	3.37363	8.36735	0.0021707	0.230262	yes	Dynlt1c	dynein light chain Tctex-type 1C
Pole4	3.00608	8.82246	0.00218704	0.23088	yes	Pole4	polymerase (DNA-directed), epsilon 4 (p12 subunit)
Aqp5	1.5183	10.639	0.00221755	0.23298	yes	Aqp5	aquaporin 5
Mgat5	2.31785	9.66996	0.00224298	0.23403	yes	Mgat5	mannoside acetylglucosaminyltransferase 5
Slc2a2	2.63366	9.27002	0.00225949	0.23403	yes	Slc2a2	solute carrier family 2 (facilitated glucose transporter), member 2
Lmln	2.32516	9.6558	0.00225951	0.23403	yes	Lmln	leishmanolysin-like (metallopeptidase M8 family)
Gm51543	2.33	9.63625	0.0022825	0.235301	yes	Gm51543	predicted gene, 51543
Rims2	2.55185	9.35199	0.00232295	0.236384	yes	Rims2	regulating synaptic membrane exocytosis 2
Syngr1	2.88005	-7.79089	0.00232564	0.236384	yes	Syngr1	synaptogyrin 1
Gm34828	1.28269	-10.392	0.0023318	0.236384	yes	Gm34828	predicted gene, 34828
Tmod3	3.23662	8.46049	0.00234564	0.236384	yes	Tmod3	tropomodulin 3
Otop3	3.05669	7.75426	0.00234683	0.236384	yes	Otop3	otopetrin 3
Pdcd5	3.32659	7.34083	0.00238599	0.238532	yes	Pdcd5	programmed cell death 5
Dnajc10	2.95321	8.7919	0.00239065	0.238532	yes	Dnajc10	DnaJ heat shock protein family (Hsp40) member C10
Gm52549	3.00023	8.73214	0.00240074	0.238532	yes	Gm52549	predicted gene, 52549
Gm13612	3.29635	8.35412	0.00241659	0.239024	yes	Gm13612	predicted gene 13612
Zcchc4	2.70532	9.09472	0.00243061	0.239334	yes	Zcchc4	zinc finger, CCHC domain containing 4
Cela3b	1.48258	10.5186	0.00246494	0.240814	yes	Cela3b	chymotrypsin-like elastase family, member 3B
Gm12992	2.91002	8.812	0.00247676	0.240814	yes	Gm12992	predicted gene 12992
Reep2	1.56312	-9.94599	0.00248836	0.240814	yes	Reep2	receptor accessory protein 2
Ubr3	2.88581	8.82936	0.00248952	0.240814	yes	Ubr3	ubiquitin protein ligase E3 component n-recognin 3
Mkrn2	2.88989	8.81718	0.00250582	0.241328	yes	Mkrn2	makorin, ring finger protein, 2
Tbx2	2.20901	9.65186	0.00252777	0.241482	yes	Tbx2	T-box 2
Mrm2	2.40987	9.40684	0.00252941	0.241482	yes	Mrm2	mitochondrial rRNA methyltransferase 2
Nxf1	2.84252	-7.57175	0.00254082	0.241521	yes	Nxf1	nuclear RNA export factor 1
Grin2d	2.39857	9.40395	0.00256441	0.242713	yes	Grin2d	glutamate receptor, ionotropic, NMDA2D (epsilon 4)
Flt1	2.92124	8.74557	0.00260234	0.243753	yes	Flt1	FMS-like tyrosine kinase 1
Ccdc71l	3.40217	8.14519	0.00261603	0.243753	yes	Ccdc71l	coiled-coil domain containing 71 like
Morf4l1-ps1	2.71791	8.9838	0.00261949	0.243753	yes	Morf4l1-ps1	mortality factor 4 like 1, pseudogene 1
Repin1	1.80788	-9.61409	0.0026198	0.243753	yes	Repin1	replication initiator 1
Clcc1	2.94897	8.68826	0.00263963	0.244561	yes	Clcc1	chloride channel CLIC-like 1
Gm51702	4.91702	4.60282	0.00268929	0.24679	yes	Gm51702	predicted gene, 51702
Fpgs	2.53592	9.18831	0.00269219	0.24679	yes	Fpgs	folylpolyglutamyl synthetase
Ppia	5.5514	-4.17342	0.0026974	0.24679	yes	Ppia	peptidylprolyl isomerase A
Zfp292	2.23415	-8.71947	0.00272955	0.247943	yes	Zfp292	zinc finger protein 292
Arhgef17	2.54204	9.16591	0.00273259	0.247943	yes	Arhgef17	Rho guanine nucleotide exchange factor (GEF) 17
Vkorc1	3.17233	8.36976	0.00276586	0.249929	yes	Vkorc1	vitamin K epoxide reductase complex, subunit 1
Gm12854	1.35706	-10.0154	0.00278568	0.250037	yes	Gm12854	predicted gene 12854
Wwox	3.6138	6.32551	0.00280253	0.250037	yes	Wwox	WW domain-containing oxidoreductase
Gm29667	8.0734	2.69188	0.00280556	0.250037	yes	Gm29667	predicted gene 29667
Papola	3.75117	7.67469	0.0028126	0.250037	yes	Papola	poly (A) polymerase alpha
Ppm1f	1.52018	-9.79502	0.00283594	0.25022	yes	Ppm1f	protein phosphatase 1F (PP2C domain containing)
Gm17644	5.6772	-3.77393	0.00284487	0.25022	yes	Gm17644	predicted gene, 17644
Ccni	4.88407	4.60785	0.00284884	0.25022	yes	Ccni	cyclin I
Tysnd1	3.00627	8.52805	0.00286426	0.250571	yes	Tysnd1	trypsin domain containing 1
Hip1	3.14886	8.35206	0.00289736	0.252461	yes	Hip1	huntingtin interacting protein 1
LOC122152371	1.07845	-10.1682	0.00293335	0.253608	yes	LOC122152371	uncharacterized LOC122152371
Mecom	1.94291	9.78882	0.00293362	0.253608	yes	Mecom	MDS1 and EVI1 complex locus
Ccnq	3.4892	6.90788	0.00295384	0.254354	yes	Ccnq	cyclin Q
Gm8971	5.6322	3.8099	0.00300091	0.257398	yes	Gm8971	predicted gene 8971
Pdzk1ip1	2.61575	8.95179	0.00302014	0.25804	yes	Pdzk1ip1	PDZK1 interacting protein 1
Hspa9	2.81662	8.68784	0.00305728	0.2602	yes	Hspa9	heat shock protein 9
Tgoln1	2.50349	9.05138	0.00308473	0.260891	yes	Tgoln1	trans-golgi network protein
Rtca	2.61109	8.92299	0.00309136	0.260891	yes	Rtca	RNA 3'-terminal phosphate cyclase
Gm12536	2.87488	8.59858	0.00311119	0.260891	yes	Gm12536	predicted gene 12536
Tmcc2	1.68489	9.94321	0.00312654	0.260891	yes	Tmcc2	transmembrane and coiled-coil domains 2
Ermap	1.16915	-9.98546	0.00314497	0.260891	yes	Ermap	erythroblast membrane-associated protein
Slain2	2.83068	8.63409	0.00314608	0.260891	yes	Slain2	SLAIN motif family, member 2
R3hdm2	3.19526	8.21147	0.00314883	0.260891	yes	R3hdm2	R3H domain containing 2
Rnf32	2.63039	8.8792	0.00316045	0.260891	yes	Rnf32	ring finger protein 32
Ywhaq	2.39918	9.1283	0.00317656	0.261036	yes	Ywhaq	tyrosine 3-monooxygenase/tryptophan 5-monooxygenase activation protein theta
Gm15345	1.27223	10.3478	0.00321525	0.261036	yes	Gm15345	predicted gene 15345
Pgap2	2.17743	9.36723	0.00322611	0.261036	yes	Pgap2	post-GPI attachment to proteins 2
Zfp664	3.41174	7.93186	0.00323677	0.261036	yes	Zfp664	zinc finger protein 664
Rheb	2.86694	8.55555	0.00324215	0.261036	yes	Rheb	Ras homolog enriched in brain
Elmo2	3.01495	8.38459	0.00324362	0.261036	yes	Elmo2	engulfment and cell motility 2
Ltf	1.61404	9.95678	0.00324818	0.261036	yes	Ltf	lactotransferrin
Tlk1	1.22307	-9.88938	0.00326483	0.261036	yes	Tlk1	tousled-like kinase 1
Gm2614	3.37626	6.98961	0.00329063	0.261036	yes	Gm2614	predicted gene 2614
Slc37a2	2.10248	9.4275	0.00329731	0.261036	yes	Slc37a2	solute carrier family 37 (glycerol-3-phosphate transporter), member 2
Aqr	2.83616	8.57467	0.00329821	0.261036	yes	Aqr	aquarius
Ankmy2	2.47822	8.99539	0.00331412	0.261036	yes	Ankmy2	ankyrin repeat and MYND domain containing 2
Slc25a12	2.59024	8.86059	0.00332776	0.261036	yes	Slc25a12	solute carrier family 25 (mitochondrial carrier, Aralar), member 12
Uba2	2.79111	8.61968	0.00332864	0.261036	yes	Uba2	ubiquitin-like modifier activating enzyme 2
Tff2	1.42976	10.0818	0.00340461	0.263106	yes	Tff2	trefoil factor 2 (spasmolytic protein 1)
Pigv	4.23299	5.34735	0.00340992	0.263106	yes	Pigv	phosphatidylinositol glycan anchor biosynthesis, class V
Pom121	3.1098	8.22441	0.00341074	0.263106	yes	Pom121	nuclear pore membrane protein 121
Sppl2a	3.15997	8.16949	0.00341228	0.263106	yes	Sppl2a	signal peptide peptidase like 2A
Mpc1	3.67031	6.53635	0.00341494	0.263106	yes	Mpc1	mitochondrial pyruvate carrier 1
Fkbp11	1.57748	9.90626	0.00344471	0.264068	yes	Fkbp11	FK506 binding protein 11
Polr2i	5.14747	4.20142	0.00345325	0.264068	yes	Polr2i	polymerase (RNA) II (DNA directed) polypeptide I
Fgf9	2.8012	8.5592	0.0034635	0.264068	yes	Fgf9	fibroblast growth factor 9
Gpihbp1	2.45506	8.95095	0.00350426	0.264277	yes	Gpihbp1	GPI-anchored HDL-binding protein 1
Dkk3	2.38232	9.00706	0.00356165	0.264277	yes	Dkk3	dickkopf WNT signaling pathway inhibitor 3
Degs1	2.79776	8.52266	0.00358961	0.264277	yes	Degs1	delta 4-desaturase, sphingolipid 1
Snx18	2.93677	8.36271	0.00359011	0.264277	yes	Snx18	sorting nexin 18
Layn	3.30941	6.74052	0.00359221	0.264277	yes	Layn	layilin
Zfp800	1.46568	-9.49075	0.00359424	0.264277	yes	Zfp800	zinc finger protein 800
Coq6	2.5366	8.83283	0.00359769	0.264277	yes	Coq6	coenzyme Q6 monooxygenase
Rdh12	1.08669	-9.81724	0.00361387	0.264277	yes	Rdh12	retinol dehydrogenase 12
Rmnd1	2.55611	8.80093	0.00362184	0.264277	yes	Rmnd1	required for meiotic nuclear division 1 homolog
Dapp1	2.56741	8.7857	0.00362511	0.264277	yes	Dapp1	dual adaptor for phosphotyrosine and 3-phosphoinositides 1
Echdc1	3.10608	8.15912	0.00364211	0.264277	yes	Echdc1	enoyl Coenzyme A hydratase domain containing 1
Gm12669	1.10922	-9.78273	0.00365544	0.264277	yes	Gm12669	predicted gene 12669
Bmp4	2.97903	8.294	0.00365557	0.264277	yes	Bmp4	bone morphogenetic protein 4
2610528J11Rik	2.83449	8.45413	0.00366596	0.264277	yes	2610528J11Rik	RIKEN cDNA 2610528J11 gene
Lrch3	2.76683	8.53415	0.00366879	0.264277	yes	Lrch3	leucine-rich repeats and calponin homology (CH) domain containing 3
Oxnad1	2.08616	9.29505	0.0036805	0.264277	yes	Oxnad1	oxidoreductase NAD-binding domain containing 1
Cwc22	2.97843	8.28869	0.00368172	0.264277	yes	Cwc22	CWC22 spliceosome-associated protein
Enoph1	2.97822	8.28743	0.00368319	0.264277	yes	Enoph1	enolase-phosphatase 1
Tut1	2.49532	8.83757	0.00370202	0.264277	yes	Tut1	terminal uridylyl transferase 1, U6 snRNA-specific
Nit2	1.59062	9.78092	0.00370769	0.264277	yes	Nit2	nitrilase family, member 2
Cdh17	5.14129	4.15207	0.00371899	0.264277	yes	Cdh17	cadherin 17
Gm53322	2.87042	8.38519	0.00376913	0.265281	yes	Gm53322	predicted gene, 53322
Cul4a	2.81939	8.44392	0.00376931	0.265281	yes	Cul4a	cullin 4A
Kcnb1	2.10782	9.23772	0.00377551	0.265281	yes	Kcnb1	potassium voltage gated channel, Shab-related subfamily, member 1
Myocd	1.63548	-9.2377	0.00379057	0.265281	yes	Myocd	myocardin
Tmem131	2.56244	8.74226	0.00379353	0.265281	yes	Tmem131	transmembrane protein 131
Mad1l1	4.068	5.35156	0.00381215	0.265385	yes	Mad1l1	MAD1 mitotic arrest deficient 1-like 1
Mrps34	4.62848	4.75954	0.00382932	0.265385	yes	Mrps34	mitochondrial ribosomal protein S34
Muc3a	3.35138	7.83255	0.00383374	0.265385	yes	Muc3a	mucin 3A, cell surface associated
Igsf9b	2.61758	8.65139	0.0038517	0.265385	yes	Igsf9b	immunoglobulin superfamily, member 9B
Sesn3	1.33533	-9.5232	0.0038701	0.265385	yes	Sesn3	sestrin 3
Fkbp5	2.63113	8.6254	0.00388091	0.265385	yes	Fkbp5	FK506 binding protein 5
Tbc1d24	2.828	8.39655	0.00388913	0.265385	yes	Tbc1d24	TBC1 domain family, member 24
Gm38649	2.90624	8.30512	0.00389664	0.265385	yes	Gm38649	predicted gene, 38649
Rab5if	3.49395	6.64289	0.00390379	0.265385	yes	Rab5if	RAB5 interacting factor
Gfm2	3.81294	5.86732	0.00393346	0.265989	yes	Gfm2	G elongation factor, mitochondrial 2
Gm4786	1.0695	-9.68593	0.00395405	0.265989	yes	Gm4786	predicted gene 4786
Ms4a8a	3.79221	6.03054	0.0039569	0.265989	yes	Ms4a8a	membrane-spanning 4-domains, subfamily A, member 8A
Dysf	3.51875	7.61555	0.00396113	0.265989	yes	Dysf	dysferlin
Hps4	3.23549	6.74154	0.00400004	0.266501	yes	Hps4	HPS4, biogenesis of lysosomal organelles complex 3 subunit 2
Lamb2	2.52071	8.71864	0.00400321	0.266501	yes	Lamb2	laminin, beta 2
Fkbpl	2.1944	9.05807	0.00400859	0.266501	yes	Fkbpl	FK506 binding protein-like
Tyw3	1.08	-9.64667	0.00402234	0.266501	yes	Tyw3	tRNA-yW synthesizing protein 3 homolog (S. cerevisiae)
Esco2	3.24469	7.89437	0.00406112	0.266501	yes	Esco2	establishment of sister chromatid cohesion N-acetyltransferase 2
2410004I01Rik	0.897845	-9.77255	0.00406178	0.266501	yes	2410004I01Rik	RIKEN cDNA 2410004I01 gene
Mettl14	1.08708	-9.62456	0.00406486	0.266501	yes	Mettl14	methyltransferase like 14
Mfsd4b4	0.878776	-9.78256	0.00407708	0.266501	yes	Mfsd4b4	major facilitator superfamily domain containing 4B4
Rad51ap1	3.53777	-5.96242	0.00408978	0.266501	yes	Rad51ap1	RAD51 associated protein 1
Ccn1	3.02512	7.20825	0.00410413	0.266501	yes	Ccn1	cellular communication network factor 1
Pcna	2.9416	8.20848	0.00411432	0.266501	yes	Pcna	proliferating cell nuclear antigen
Josd1	5.19538	4.01949	0.00411439	0.266501	yes	Josd1	Josephin domain containing 1
Lypla1	3.04385	8.0844	0.00415323	0.266954	yes	Lypla1	lysophospholipase 1
Dda1	5.03892	4.1946	0.00415863	0.266954	yes	Dda1	DET1 and DDB1 associated 1
Grk3	1.76442	9.45015	0.00416924	0.266954	yes	Grk3	G protein-coupled receptor kinase 3
Zfp975	1.25381	-9.47599	0.00418138	0.266954	yes	Zfp975	zinc finger protein 975
Cenpa	1.94196	9.29001	0.00418217	0.266954	yes	Cenpa	centromere protein A
Abca2	2.41893	8.76009	0.0042007	0.267265	yes	Abca2	ATP-binding cassette, sub-family A (ABC1), member 2
Gnpat	2.70419	8.44038	0.00422591	0.267265	yes	Gnpat	glyceronephosphate O-acyltransferase
Tubgcp4	1.25823	-9.45305	0.00422672	0.267265	yes	Tubgcp4	tubulin, gamma complex associated protein 4
Rhobtb2	8.8216	-2.37364	0.00423574	0.267265	yes	Rhobtb2	Rho-related BTB domain containing 2
Inhba	1.67453	9.49501	0.00426612	0.268065	yes	Inhba	inhibin beta-A
Rfxap	2.95561	8.15008	0.00428104	0.268065	yes	Rfxap	regulatory factor X-associated protein
Ndor1	4.49071	4.74187	0.00429103	0.268065	yes	Ndor1	NADPH dependent diflavin oxidoreductase 1
Trpc1	1.10188	-9.52404	0.00430666	0.268065	yes	Trpc1	transient receptor potential cation channel, subfamily C, member 1
Tac1	2.47486	8.67626	0.00430945	0.268065	yes	Tac1	tachykinin 1
Gm52298	1.65287	-9.03217	0.00432465	0.268251	yes	Gm52298	predicted gene, 52298
Slc30a10	2.58962	8.54742	0.0043545	0.268307	yes	Slc30a10	solute carrier family 30, member 10
Nipsnap1	3.39501	6.66875	0.00435555	0.268307	yes	Nipsnap1	nipsnap homolog 1
Gm54104	3.20833	6.587	0.00437268	0.268307	yes	Gm54104	predicted gene, 54104
Bnip2	4.79768	-4.37186	0.00438366	0.268307	yes	Bnip2	BCL2/adenovirus E1B interacting protein 2
Camta1	3.05591	8.00847	0.00439725	0.268307	yes	Camta1	calmodulin binding transcription activator 1
Prdm16os	1.39424	9.70627	0.00444577	0.268307	yes	Prdm16os	Prdm16 opposite strand transcript
Mgme1	1.37517	-9.25372	0.00446225	0.268307	yes	Mgme1	mitochondrial genome maintenance exonuclease 1
Zc3h6	3.08953	7.96033	0.00446728	0.268307	yes	Zc3h6	zinc finger CCCH type containing 6
Aste1	2.51979	8.58038	0.00448567	0.268307	yes	Aste1	asteroid homolog 1
Entpd4	2.58667	8.49929	0.00450443	0.268307	yes	Entpd4	ectonucleoside triphosphate diphosphohydrolase 4
Srp54c	2.27539	8.81797	0.00451948	0.268307	yes	Srp54c	signal recognition particle 54C
Tmem205	5.77738	3.49955	0.00455447	0.268307	yes	Tmem205	transmembrane protein 205
Vps50	1.05736	-9.46105	0.00455974	0.268307	yes	Vps50	VPS50 EARP/GARPII complex subunit
Zmym3	3.00749	8.02158	0.00456503	0.268307	yes	Zmym3	zinc finger, MYM-type 3
Gask1b	1.10009	9.89046	0.00457395	0.268307	yes	Gask1b	golgi associated kinase 1B
Gm51653	2.19489	8.88428	0.00458136	0.268307	yes	Gm51653	predicted gene, 51653
LOC115488927	1.52597	9.52678	0.00458255	0.268307	yes	LOC115488927	uncharacterized LOC115488927
Ndufaf3	2.93642	8.09294	0.00458697	0.268307	yes	Ndufaf3	NADH:ubiquinone oxidoreductase complex assembly factor 3
Zfp13	1.72981	9.33799	0.00459387	0.268307	yes	Zfp13	zinc finger protein 13
Riok2	2.84271	7.31603	0.00461896	0.268307	yes	Riok2	RIO kinase 2
Chmp2b	2.50114	8.55078	0.00462758	0.268307	yes	Chmp2b	charged multivesicular body protein 2B
Man1a	2.96565	7.15181	0.00463245	0.268307	yes	Man1a	mannosidase 1, alpha
Oasl2	3.14949	7.85658	0.00463357	0.268307	yes	Oasl2	2'-5' oligoadenylate synthetase-like 2
Ppip5k1	2.54085	8.50857	0.00465376	0.268307	yes	Ppip5k1	diphosphoinositol pentakisphosphate kinase 1
Gpx2	9.91695	2.11322	0.00465403	0.268307	yes	Gpx2	glutathione peroxidase 2
Rbm19	3.2648	6.44638	0.00466449	0.268307	yes	Rbm19	RNA binding motif protein 19
Elac1	2.08837	8.96996	0.00466719	0.268307	yes	Elac1	elaC ribonuclease Z 1
Rangrf	2.62665	8.40566	0.00467841	0.268307	yes	Rangrf	RAN guanine nucleotide release factor
Gtf2a2	2.7147	8.30309	0.00470108	0.268307	yes	Gtf2a2	general transcription factor II A, 2
Cma2	1.83991	9.20565	0.00470288	0.268307	yes	Cma2	chymase 2, mast cell
Mex3a	1.98571	9.07166	0.00471673	0.268307	yes	Mex3a	mex3 RNA binding family member A
Exph5	2.88925	8.10843	0.0047271	0.268307	yes	Exph5	exophilin 5
Pdss2	3.23187	6.79595	0.00472879	0.268307	yes	Pdss2	prenyl (solanesyl) diphosphate synthase, subunit 2
Fdps	4.25013	5.04866	0.00475168	0.268911	yes	Fdps	farnesyl diphosphate synthetase
Platr25	1.61832	9.37557	0.00477934	0.269781	yes	Platr25	pluripotency associated transcript 25
Acadsb	2.77389	8.2117	0.00480878	0.269958	yes	Acadsb	acyl-Coenzyme A dehydrogenase, short/branched chain
Rab19	2.66873	8.31799	0.00484208	0.269958	yes	Rab19	RAB19, member RAS oncogene family
Sdha	5.55652	3.65513	0.00485057	0.269958	yes	Sdha	succinate dehydrogenase complex, subunit A, flavoprotein (Fp)
Imp4	2.5879	8.40667	0.00486951	0.269958	yes	Imp4	IMP4, U3 small nucleolar ribonucleoprotein
Gm43471	1.12979	-9.3012	0.00487364	0.269958	yes	Gm43471	predicted gene 43471
Fam120a	2.61048	8.37485	0.0048749	0.269958	yes	Fam120a	family with sequence similarity 120, member A
Cdkn2b	2.6937	8.2817	0.0048749	0.269958	yes	Cdkn2b	cyclin dependent kinase inhibitor 2B
Sac3d1	2.21615	8.77634	0.00488083	0.269958	yes	Sac3d1	SAC3 domain containing 1
Sulf2	2.55477	8.42753	0.00491453	0.271139	yes	Sulf2	sulfatase 2
Kmo	0.692304	-9.63533	0.00492918	0.271266	yes	Kmo	kynurenine 3-monooxygenase (kynurenine 3-hydroxylase)
Zfp553	2.33741	8.62674	0.00496147	0.271542	yes	Zfp553	zinc finger protein 553
Rps24	8.20895	-5.04268	0.00497139	0.271542	yes	Rps24	ribosomal protein S24
Pou2af1	1.44974	9.47241	0.00497154	0.271542	yes	Pou2af1	POU domain, class 2, associating factor 1
Sfxn2	2.57624	8.38828	0.00498368	0.271542	yes	Sfxn2	sideroflexin 2
Gyg	1.51583	-8.93381	0.00502791	0.272579	yes	Gyg	glycogenin
Emc4	2.64005	8.30286	0.00503613	0.272579	yes	Emc4	ER membrane protein complex subunit 4
Dnal4	2.82205	8.10788	0.00503995	0.272579	yes	Dnal4	dynein, axonemal, light chain 4
Adm	0.760767	-9.52144	0.00506814	0.272586	yes	Adm	adrenomedullin
1810014B01Rik	2.90118	8.01702	0.00507226	0.272586	yes	1810014B01Rik	RIKEN cDNA 1810014B01 gene
Gm53637	0.897588	-9.39542	0.00508574	0.272586	yes	Gm53637	predicted gene, 53637
Rit1	3.51249	6.3766	0.00508972	0.272586	yes	Rit1	Ras-like without CAAX 1
Cd44	2.24322	8.69101	0.0051053	0.272754	yes	Cd44	CD44 antigen
Hck	1.72794	9.17431	0.00514571	0.274246	yes	Hck	hemopoietic cell kinase
Lin52	0.839845	-9.4195	0.00516123	0.27431	yes	Lin52	lin-52 DREAM MuvB core complex component
Fam98b	2.47168	8.44735	0.00517189	0.27431	yes	Fam98b	family with sequence similarity 98, member B
Dcxr	2.41808	8.48262	0.00521719	0.276046	yes	Dcxr	dicarbonyl L-xylulose reductase
Milr1	1.15611	-9.16229	0.00525687	0.276153	yes	Milr1	mast cell immunoglobulin like receptor 1
Ddc	3.64065	7.22559	0.00525824	0.276153	yes	Ddc	dopa decarboxylase
Zfp618	1.55459	9.28991	0.00526558	0.276153	yes	Zfp618	zinc finger protein 618
Sptlc1	2.83196	8.04142	0.00528636	0.276153	yes	Sptlc1	serine palmitoyltransferase, long chain base subunit 1
Traf3ip3	1.0431	-9.22231	0.00529235	0.276153	yes	Traf3ip3	TRAF3 interacting protein 3
Aldh1a1	2.77071	7.24755	0.00531892	0.276153	yes	Aldh1a1	aldehyde dehydrogenase family 1, subfamily A1
Gm31434	2.45169	8.42227	0.00533634	0.276153	yes	Gm31434	predicted gene, 31434
Ccdc154	0.699958	-9.49	0.00533664	0.276153	yes	Ccdc154	coiled-coil domain containing 154
Usp1	2.64729	8.22503	0.00534565	0.276153	yes	Usp1	ubiquitin specific peptidase 1
Pirt	0.936141	-9.27994	0.00535481	0.276153	yes	Pirt	phosphoinositide-interacting regulator of transient receptor potential channels
Arf4	3.14324	6.80714	0.00536215	0.276153	yes	Arf4	ADP-ribosylation factor 4
Maged1	3.13265	6.79532	0.00537013	0.276153	yes	Maged1	MAGE family member D1
Gm46095	1.84742	9.01143	0.0053861	0.276327	yes	Gm46095	predicted gene, 46095
Gm19345	0.653514	-9.5064	0.00543205	0.277994	yes	Gm19345	predicted gene, 19345
Sned1	2.29817	8.54533	0.00544391	0.277994	yes	Sned1	sushi, nidogen and EGF-like domains 1
Dpt	2.79627	8.05179	0.00549411	0.279907	yes	Dpt	dermatopontin
Gdi2	2.56889	8.26987	0.00552207	0.280185	yes	Gdi2	guanosine diphosphate (GDP) dissociation inhibitor 2
Gm1604a	0.591451	-9.49602	0.00552509	0.280185	yes	Gm1604a	predicted gene 1604A
1810073O08Rik	0.56901	-9.49601	0.00555429	0.280719	yes	1810073O08Rik	RIKEN cDNA 1810073O08 gene
Thap12	2.90423	7.91249	0.00556121	0.280719	yes	Thap12	THAP domain containing 12
Itpripl2	1.815	8.98593	0.00557926	0.280985	yes	Itpripl2	inositol 1,4,5-triphosphate receptor interacting protein-like 2
Timm9	2.55394	8.26573	0.00560875	0.281449	yes	Timm9	translocase of inner mitochondrial membrane 9
Cdca2	2.58702	8.22857	0.00561857	0.281449	yes	Cdca2	cell division cycle associated 2
Psma4	2.17838	8.61675	0.00563716	0.281449	yes	Psma4	proteasome subunit alpha 4
Gm16023	0.81731	-9.28687	0.00563974	0.281449	yes	Gm16023	predicted gene 16023
Cmtm5	0.931934	9.65217	0.00567926	0.282381	yes	Cmtm5	CKLF-like MARVEL transmembrane domain containing 5
5930430L01Rik	2.0574	8.73192	0.00568622	0.282381	yes	5930430L01Rik	RIKEN cDNA 5930430L01 gene
Ankrd12	6.11529	-3.20407	0.00569701	0.282381	yes	Ankrd12	ankyrin repeat domain 12
St3gal2	2.76775	7.16758	0.00575123	0.283082	yes	St3gal2	ST3 beta-galactoside alpha-2,3-sialyltransferase 2
Blnk	1.82176	8.93088	0.00575987	0.283082	yes	Blnk	B cell linker
C130036L24Rik	1.80214	8.95033	0.00576135	0.283082	yes	C130036L24Rik	RIKEN cDNA C130036L24 gene
Gm36556	2.15054	8.62043	0.00576271	0.283082	yes	Gm36556	predicted gene, 36556
B4galt2	1.30483	-8.92071	0.00578228	0.283409	yes	B4galt2	UDP-Gal:betaGlcNAc beta 1,4- galactosyltransferase, polypeptide 2
Malsu1	3.40393	6.37656	0.00583102	0.285162	yes	Malsu1	mitochondrial assembly of ribosomal large subunit 1
Fbxo28	2.33682	8.41182	0.00586009	0.285435	yes	Fbxo28	F-box protein 28
LOC115487798	1.38444	9.28441	0.0058697	0.285435	yes	LOC115487798	uncharacterized LOC115487798
LOC108168731	0.525998	-9.40808	0.00590018	0.285435	yes	LOC108168731	uncharacterized LOC108168731
Rab34	1.93593	-8.34565	0.00593979	0.285435	yes	Rab34	RAB34, member RAS oncogene family
Eno1b	4.31348	4.69884	0.00594481	0.285435	yes	Eno1b	enolase 1B, retrotransposed
Armc1	2.86769	7.87069	0.00595292	0.285435	yes	Armc1	armadillo repeat containing 1
Smim7	3.08411	7.6557	0.00597283	0.285435	yes	Smim7	small integral membrane protein 7
Cisd3	6.68763	2.91791	0.00597845	0.285435	yes	Cisd3	CDGSH iron sulfur domain 3
Mrpl47	0.904089	-9.11525	0.00599897	0.285435	yes	Mrpl47	mitochondrial ribosomal protein L47
Cenpf	2.50492	8.22892	0.00600097	0.285435	yes	Cenpf	centromere protein F
Dcn	1.4245	-8.73731	0.00601981	0.285435	yes	Dcn	decorin
Gm51959	0.433326	-9.41531	0.00603541	0.285435	yes	Gm51959	predicted gene, 51959
Qrfp	0.977502	-9.05041	0.00603747	0.285435	yes	Qrfp	pyroglutamylated RFamide peptide
Fam210a	2.62568	8.10166	0.00604676	0.285435	yes	Fam210a	family with sequence similarity 210, member A
Raph1	2.25595	8.44549	0.00605323	0.285435	yes	Raph1	Ras association (RalGDS/AF-6) and pleckstrin homology domains 1
Angel1	0.783722	-9.19226	0.00606477	0.285435	yes	Angel1	angel homolog 1
Stard8	0.614293	-9.32144	0.00607379	0.285435	yes	Stard8	START domain containing 8
Gm53961	1.53023	9.09561	0.00607562	0.285435	yes	Gm53961	predicted gene, 53961
Thop1	2.06408	8.62936	0.00608359	0.285435	yes	Thop1	thimet oligopeptidase 1
Pik3cg	0.564703	-9.3214	0.00614046	0.287106	yes	Pik3cg	phosphatidylinositol-4,5-bisphosphate 3-kinase catalytic subunit gamma
Slc38a2	2.33726	8.35097	0.00614696	0.287106	yes	Slc38a2	solute carrier family 38, member 2
Abhd18	1.47182	9.12627	0.00615844	0.287106	yes	Abhd18	abhydrolase domain containing 18
Ell2	2.13723	8.53022	0.0062107	0.288929	yes	Ell2	elongation factor for RNA polymerase II 2
Nrarp	3.00661	7.68245	0.00624018	0.289687	yes	Nrarp	Notch-regulated ankyrin repeat protein
Cd2ap	2.84604	7.83199	0.00628234	0.289768	yes	Cd2ap	CD2-associated protein
Gm53410	0.691472	9.68242	0.00628326	0.289768	yes	Gm53410	predicted gene, 53410
Naip1	1.93213	-8.25316	0.00631156	0.289768	yes	Naip1	NLR family, apoptosis inhibitory protein 1
Hid1	3.91145	5.16738	0.00631247	0.289768	yes	Hid1	HID1 domain containing
Ppp2ca	2.58453	8.0899	0.0063169	0.289768	yes	Ppp2ca	protein phosphatase 2 (formerly 2A), catalytic subunit, alpha isoform
Mgst1	2.83639	7.83134	0.00632366	0.289768	yes	Mgst1	microsomal glutathione S-transferase 1
Rmnd5a	3.01206	-6.33864	0.00635617	0.289768	yes	Rmnd5a	required for meiotic nuclear division 5 homolog A
Ldb2	0.534262	-9.27244	0.00635974	0.289768	yes	Ldb2	LIM domain binding 2
Dnajc30	2.5432	8.12173	0.0063607	0.289768	yes	Dnajc30	DnaJ heat shock protein family (Hsp40) member C30
Gid4	2.1617	8.46544	0.00639252	0.290615	yes	Gid4	GID complex subunit 4, VID24 homolog
Chchd10	7.17706	2.69892	0.00641297	0.290942	yes	Chchd10	coiled-coil-helix-coiled-coil-helix domain containing 10
Gm16740	0.653374	-9.19961	0.0064631	0.291627	yes	Gm16740	predicted gene, 16740
Duoxa2	3.1352	7.51845	0.00648471	0.291627	yes	Duoxa2	dual oxidase maturation factor 2
Gm51809	1.99626	8.61894	0.00648728	0.291627	yes	Gm51809	predicted gene, 51809
Smyd2	2.56797	8.07122	0.00649427	0.291627	yes	Smyd2	SET and MYND domain containing 2
Mtmr14	3.48974	5.94053	0.00649963	0.291627	yes	Mtmr14	myotubularin related protein 14
D830024N08Rik	1.95148	8.66199	0.00650775	0.291627	yes	D830024N08Rik	RIKEN cDNA D830024N08 gene
Luzp1	8.45049	-2.32594	0.00657382	0.293141	yes	Luzp1	leucine zipper protein 1
Kifap3	2.97431	7.65585	0.00658102	0.293141	yes	Kifap3	kinesin-associated protein 3
Sh3bp1	2.93342	6.81049	0.00658213	0.293141	yes	Sh3bp1	SH3-domain binding protein 1
Gm13528	2.51839	8.09663	0.00660678	0.293141	yes	Gm13528	predicted gene 13528
Maob	3.09571	6.61581	0.00661151	0.293141	yes	Maob	monoamine oxidase B
Krtap4-16	0.482621	-9.2228	0.00663006	0.293141	yes	Krtap4-16	keratin associated protein 4-16
Mtus1	2.65703	7.95462	0.00663499	0.293141	yes	Mtus1	mitochondrial tumor suppressor 1
Zfp994	2.04093	8.52815	0.00668205	0.293684	yes	Zfp994	zinc finger protein 994
Lama1	0.570393	-9.16931	0.00668767	0.293684	yes	Lama1	laminin, alpha 1
Ror2	1.34964	9.11182	0.00669953	0.293684	yes	Ror2	receptor tyrosine kinase-like orphan receptor 2
Map3k1	2.11506	8.448	0.00670636	0.293684	yes	Map3k1	mitogen-activated protein kinase kinase kinase 1
Ywhab	4.93275	3.99426	0.00671551	0.293684	yes	Ywhab	tyrosine 3-monooxygenase/tryptophan 5-monooxygenase activation protein, beta polypeptide
Osbpl5	2.28407	8.27864	0.00673983	0.293684	yes	Osbpl5	oxysterol binding protein-like 5
Eps8	3.6058	5.76328	0.00678227	0.293684	yes	Eps8	epidermal growth factor receptor pathway substrate 8
Dhx34	1.52856	8.93063	0.00678872	0.293684	yes	Dhx34	DEAH (Asp-Glu-Ala-His) box polypeptide 34
Pank1	2.21118	8.33774	0.00679824	0.293684	yes	Pank1	pantothenate kinase 1
Msantd7	2.10773	8.43391	0.00681105	0.293684	yes	Msantd7	Myb/SANT DNA binding domain containing 7
Skic3	1.24558	-8.69514	0.00681742	0.293684	yes	Skic3	SKI3 subunit of superkiller complex
Slc7a15	3.01133	6.67937	0.00682338	0.293684	yes	Slc7a15	solute carrier family 7 (cationic amino acid transporter, y+ system), member 15
Birc5	3.44952	7.16736	0.00682416	0.293684	yes	Birc5	baculoviral IAP repeat-containing 5
Zfp628	3.52958	5.85249	0.00683453	0.293684	yes	Zfp628	zinc finger protein 628
Atoh8	1.41305	9.01758	0.00685162	0.293843	yes	Atoh8	atonal bHLH transcription factor 8
Il17d	1.64061	8.81303	0.00689322	0.294561	yes	Il17d	interleukin 17D
Mt1	8.78164	2.23851	0.00690421	0.294561	yes	Mt1	metallothionein 1
Cyp2s1	3.65114	5.71886	0.00690858	0.294561	yes	Cyp2s1	cytochrome P450, family 2, subfamily s, polypeptide 1
Gm7206	7.13742	-2.67726	0.00695309	0.294607	yes	Gm7206	predicted pseudogene 7206
Gm17415	0.281063	-9.24924	0.00696218	0.294607	yes	Gm17415	predicted gene, 17415
Tmed3	4.21942	4.70778	0.00697111	0.294607	yes	Tmed3	transmembrane p24 trafficking protein 3
Slc2a8	1.47983	8.92942	0.00697916	0.294607	yes	Slc2a8	solute carrier family 2, (facilitated glucose transporter), member 8
Gm52329	1.30596	9.08825	0.00698828	0.294607	yes	Gm52329	predicted gene, 52329
Lonp2	2.09411	8.40957	0.00699788	0.294607	yes	Lonp2	lon peptidase 2, peroxisomal
Ggt6	2.86703	7.6843	0.00700513	0.294607	yes	Ggt6	gamma-glutamyltransferase 6
Itga1	1.31316	-8.60392	0.00704279	0.294607	yes	Itga1	integrin alpha 1
Map2k5	2.57082	7.97017	0.0070501	0.294607	yes	Map2k5	mitogen-activated protein kinase kinase 5
Snrnp48	6.59448	-2.88993	0.00705086	0.294607	yes	Snrnp48	small nuclear ribonucleoprotein 48 (U11/U12)
Gm8234	3.79249	5.40382	0.0070736	0.294607	yes	Gm8234	predicted gene 8234
A430088P11Rik	2.839	7.70029	0.0070831	0.294607	yes	A430088P11Rik	RIKEN cDNA A430088P11 gene
Slc2a4rg-ps	1.33979	-8.56201	0.00710084	0.294607	yes	Slc2a4rg-ps	Slc2a4 regulator, pseudogene
Enkd1	2.0458	8.43434	0.00710584	0.294607	yes	Enkd1	enkurin domain containing 1
Mrps6	2.23228	8.25616	0.00712776	0.294607	yes	Mrps6	mitochondrial ribosomal protein S6
Dkk2	1.21106	-8.64409	0.00714902	0.294607	yes	Dkk2	dickkopf WNT signaling pathway inhibitor 2
Podxl	2.3007	8.18768	0.00715041	0.294607	yes	Podxl	podocalyxin-like
Mboat2	0.723706	9.43047	0.0071515	0.294607	yes	Mboat2	membrane bound O-acyltransferase domain containing 2
Gm4316	2.11625	-7.8999	0.00716458	0.294607	yes	Gm4316	predicted gene 4316
Mrpl16	2.36592	8.12566	0.00718429	0.294865	yes	Mrpl16	mitochondrial ribosomal protein L16
Vta1	3.44449	6.12603	0.00721984	0.295311	yes	Vta1	vesicle (multivesicular body) trafficking 1
Gjb1	4.87459	3.99152	0.00722473	0.295311	yes	Gjb1	gap junction protein, beta 1
Mrpl36	4.25512	4.65079	0.0072355	0.295311	yes	Mrpl36	mitochondrial ribosomal protein L36
Dync2i2	0.968012	9.2069	0.00731783	0.297079	yes	Dync2i2	dynein 2 intermediate chain 2
Map3k21	0.88657	-8.79704	0.00733305	0.297079	yes	Map3k21	mitogen-activated protein kinase kinase kinase 21
Ifit1bl2	3.19939	6.07918	0.00733945	0.297079	yes	Ifit1bl2	interferon induced protein with tetratricopeptide repeats 1B like 2
Pdia3	2.3633	8.09865	0.00734247	0.297079	yes	Pdia3	protein disulfide isomerase associated 3
Noxo1	4.43911	4.37259	0.00735683	0.297079	yes	Noxo1	NADPH oxidase organizer 1
Nup205	0.927073	-8.75699	0.00736001	0.297079	yes	Nup205	nucleoporin 205
Gstt3	2.30401	8.14244	0.00738393	0.297315	yes	Gstt3	glutathione S-transferase, theta 3
Vmp1	2.68474	7.79728	0.00739294	0.297315	yes	Vmp1	vacuole membrane protein 1
Rnf4	2.54999	7.92923	0.00740934	0.29743	yes	Rnf4	ring finger protein 4
Ggact	2.17846	8.25073	0.00743363	0.297861	yes	Ggact	gamma-glutamylamine cyclotransferase
Gm8242	2.47295	7.98162	0.00746332	0.298506	yes	Gm8242	predicted gene 8242
Shroom1	1.0604	9.10786	0.00751087	0.299277	yes	Shroom1	shroom family member 1
Bmal1	2.64464	7.82055	0.0075147	0.299277	yes	Bmal1	basic helix-loop-helix ARNT like 1
Patz1	0.590514	-8.95565	0.0075235	0.299277	yes	Patz1	POZ (BTB) and AT hook containing zinc finger 1
Stt3b	2.53437	7.91812	0.00755343	0.299333	yes	Stt3b	STT3, subunit of the oligosaccharyltransferase complex, homolog B (S. cerevisiae)
Shfl	2.54069	7.91271	0.00755639	0.299333	yes	Shfl	shiftless antiviral inhibitor of ribosomal frameshifting
Gm16892	2.87717	6.54211	0.00759063	0.299333	yes	Gm16892	predicted gene, 16892
Gm29917	1.10433	9.06407	0.00759705	0.299333	yes	Gm29917	predicted gene, 29917
Mrpl44	2.2809	8.13404	0.00760024	0.299333	yes	Mrpl44	mitochondrial ribosomal protein L44
Mlkl	3.43254	6.11764	0.00760669	0.299333	yes	Mlkl	mixed lineage kinase domain-like
Copg2os2	0.436688	-8.99969	0.00762439	0.299493	yes	Copg2os2	coatomer protein complex, subunit gamma 2, opposite strand 2
Dagla	1.81792	8.52672	0.0076791	0.30031	yes	Dagla	diacylglycerol lipase, alpha
Tut7	4.5369	4.38611	0.00770376	0.30031	yes	Tut7	terminal uridylyl transferase 7
6330537M06Rik	0.916519	9.15582	0.00770748	0.30031	yes	6330537M06Rik	RIKEN cDNA 6330537M06 gene
Srm	3.00467	6.35286	0.00770754	0.30031	yes	Srm	spermidine synthase
Gucy1a1	0.987992	9.10798	0.00771358	0.30031	yes	Gucy1a1	guanylate cyclase 1, soluble, alpha 1
Gm32604	1.88772	8.45713	0.00776296	0.301162	yes	Gm32604	predicted gene, 32604
Uqcrc1	8.25721	2.31662	0.00778557	0.301162	yes	Uqcrc1	ubiquinol-cytochrome c reductase core protein 1
Frg1	2.04529	8.31255	0.00778928	0.301162	yes	Frg1	FSHD region gene 1
Micos13	5.99943	3.12686	0.00779061	0.301162	yes	Micos13	mitochondrial contact site and cristae organizing system subunit 13
Nuak2	2.73444	7.68474	0.00781473	0.301162	yes	Nuak2	NUAK family, SNF1-like kinase, 2
Gm52428	0.644791	-8.87349	0.00783076	0.301162	yes	Gm52428	predicted gene, 52428
Nostrin	2.34517	-7.57267	0.00786533	0.301162	yes	Nostrin	nitric oxide synthase trafficker
Avpi1	2.2044	8.14868	0.00787214	0.301162	yes	Avpi1	arginine vasopressin-induced 1
Klhl5	0.625995	-8.86426	0.00787429	0.301162	yes	Klhl5	kelch-like 5
Nmnat3	0.860731	-8.69159	0.00787781	0.301162	yes	Nmnat3	nicotinamide nucleotide adenylyltransferase 3
Ndufab1	2.05934	8.27535	0.00789962	0.301162	yes	Ndufab1	NADH:ubiquinone oxidoreductase subunit AB1
Lyrm4	0.463489	-8.91965	0.00790005	0.301162	yes	Lyrm4	LYR motif containing 4
Atp8a1	0.699252	-8.8066	0.00792731	0.301417	yes	Atp8a1	ATPase, aminophospholipid transporter (APLT), class I, type 8A, member 1
Scmh1	3.31084	5.98994	0.00794341	0.301417	yes	Scmh1	sex comb on midleg homolog 1
Ttc32	2.8451	7.56603	0.00794792	0.301417	yes	Ttc32	tetratricopeptide repeat domain 32
Gpr55	2.32433	8.02309	0.00799077	0.301912	yes	Gpr55	G protein-coupled receptor 55
Gm9836	3.23157	5.94916	0.0080177	0.301912	yes	Gm9836	predicted pseudogene 9836
Haus2	2.35123	7.99771	0.00802685	0.301912	yes	Haus2	HAUS augmin-like complex, subunit 2
Phykpl	2.72651	7.66376	0.00802969	0.301912	yes	Phykpl	5-phosphohydroxy-L-lysine phospholyase
Smim33	1.86637	8.42864	0.00803958	0.301912	yes	Smim33	small integral membrane protein 33
Zfp414	2.55122	7.83844	0.00804698	0.301912	yes	Zfp414	zinc finger protein 414
Mast1	0.654033	9.28308	0.00806039	0.301912	yes	Mast1	microtubule associated serine/threonine kinase 1
Serf1	2.59255	7.78104	0.00807097	0.301912	yes	Serf1	small EDRK-rich factor 1
Ccdc117	2.00624	7.63321	0.00810089	0.302032	yes	Ccdc117	coiled-coil domain containing 117
Snrnp35	2.99084	7.40845	0.00810824	0.302032	yes	Snrnp35	small nuclear ribonucleoprotein 35 (U11/U12)
Gpr27	0.485448	-8.86817	0.00811543	0.302032	yes	Gpr27	G protein-coupled receptor 27
Gm41358	0.690367	-8.7696	0.00813793	0.302357	yes	Gm41358	predicted gene, 41358
Rtraf	2.16941	8.12826	0.0081775	0.302916	yes	Rtraf	RNA transcription, translation and transport factor
Dolk	2.03865	8.2463	0.00818698	0.302916	yes	Dolk	dolichol kinase
Lrrc47	3.03632	7.36012	0.00819439	0.302916	yes	Lrrc47	leucine rich repeat containing 47
Isoc2b	0.697577	-8.74679	0.00821714	0.302923	yes	Isoc2b	isochorismatase domain containing 2b
Timm17b	4.38348	4.36751	0.00822216	0.302923	yes	Timm17b	translocase of inner mitochondrial membrane 17b
Dusp28	2.79107	7.56639	0.00827069	0.304201	yes	Dusp28	dual specificity phosphatase 28
Psma2	1.54245	-8.14743	0.00829133	0.30445	yes	Psma2	proteasome subunit alpha 2
Gm46840	0.337861	-8.88272	0.0083546	0.304544	yes	Gm46840	predicted gene, 46840
Bmp3	2.05859	8.20111	0.00836272	0.304544	yes	Bmp3	bone morphogenetic protein 3
Uqcc6	2.06489	8.18971	0.00838228	0.304544	yes	Uqcc6	ubiquinol-cytochrome c reductase complex assembly factor 6
Nags	4.76	4.05394	0.00839558	0.304544	yes	Nags	N-acetylglutamate synthase
Sobp	1.29729	8.80301	0.00840629	0.304544	yes	Sobp	sine oculis binding protein
Hexim2	1.69845	8.46997	0.00841281	0.304544	yes	Hexim2	hexamethylene bis-acetamide inducible 2
Dgkq	1.90011	8.32766	0.00844381	0.304544	yes	Dgkq	diacylglycerol kinase, theta
Gm46560	0.180018	-8.96405	0.00844908	0.304544	yes	Gm46560	predicted gene, 46560
Mtpn	2.22495	8.03251	0.00846269	0.304544	yes	Mtpn	myotrophin
Exosc4	4.41251	4.35837	0.00846632	0.304544	yes	Exosc4	exosome component 4
Eef1a1	7.94115	-2.66899	0.00847577	0.304544	yes	Eef1a1	eukaryotic translation elongation factor 1 alpha 1
Unc5cl	2.24155	8.01782	0.00848269	0.304544	yes	Unc5cl	unc-5 family C-terminal like
St7	0.50069	-8.77659	0.00849304	0.304544	yes	St7	suppression of tumorigenicity 7
Slc30a7	2.23525	8.02746	0.00851103	0.304544	yes	Slc30a7	solute carrier family 30 (zinc transporter), member 7
Tspan17	2.69027	7.62315	0.00852948	0.304544	yes	Tspan17	tetraspanin 17
Cdkn2c	1.26935	-8.32182	0.00855916	0.304544	yes	Cdkn2c	cyclin dependent kinase inhibitor 2C
Gpr20	2.54395	7.75018	0.00857814	0.304544	yes	Gpr20	G protein-coupled receptor 20
Copb2	3.55415	6.8474	0.00858318	0.304544	yes	Copb2	coatomer protein complex, subunit beta 2 (beta prime)
B230220B15Rik	0.812088	-8.58546	0.00859075	0.304544	yes	B230220B15Rik	RIKEN cDNA B230220B15 gene
Gm50105	1.58978	8.52474	0.00859338	0.304544	yes	Gm50105	predicted gene, 50105
Sp5	1.72877	8.42021	0.0086222	0.304544	yes	Sp5	trans-acting transcription factor 5
Ltbp1	0.510704	-8.7462	0.00862222	0.304544	yes	Ltbp1	latent transforming growth factor beta binding protein 1
Gm41638	1.98962	8.21821	0.00864095	0.304544	yes	Gm41638	predicted gene, 41638
Cd99l2	2.70063	7.59355	0.0086797	0.304544	yes	Cd99l2	CD99 antigen-like 2
Casp8	2.34049	7.90411	0.00867992	0.304544	yes	Casp8	caspase 8
Ttc7b	0.497767	-8.7359	0.00869726	0.304544	yes	Ttc7b	tetratricopeptide repeat domain 7B
Tmem183a	2.90166	6.53801	0.0087255	0.304544	yes	Tmem183a	transmembrane protein 183A
Parp12	2.03892	8.14959	0.00877434	0.304544	yes	Parp12	poly (ADP-ribose) polymerase family, member 12
Ap5m1	0.478472	-8.72553	0.00878666	0.304544	yes	Ap5m1	adaptor-related protein complex 5, mu 1 subunit
Wdr75	0.327201	-8.79631	0.00879627	0.304544	yes	Wdr75	WD repeat domain 75
Gm14762	0.379306	-8.7735	0.00879932	0.304544	yes	Gm14762	predicted gene 14762
Alcam	0.529534	9.1705	0.00880405	0.304544	yes	Alcam	activated leukocyte cell adhesion molecule
Tmem50b	2.30285	7.90909	0.00883905	0.304544	yes	Tmem50b	transmembrane protein 50B
Grhpr	6.18427	2.97861	0.00885134	0.304544	yes	Grhpr	glyoxylate reductase/hydroxypyruvate reductase
LOC118568404	1.349	-8.20764	0.0088534	0.304544	yes	LOC118568404	uncharacterized LOC118568404
Crebl2	2.86789	7.41874	0.00885363	0.304544	yes	Crebl2	cAMP responsive element binding protein-like 2
Itih5	2.45616	7.78025	0.00888038	0.304544	yes	Itih5	inter-alpha-trypsin inhibitor, heavy chain 5
Traf3	1.84525	8.29521	0.00890943	0.304544	yes	Traf3	TNF receptor-associated factor 3
Cth	2.85181	7.42474	0.0089205	0.304544	yes	Cth	cystathionase (cystathionine gamma-lyase)
9030607L20Rik	3.51106	5.53992	0.00898372	0.304544	yes	9030607L20Rik	RIKEN cDNA 9030607L20 gene
Srsf10	2.18524	7.98732	0.00899996	0.304544	yes	Srsf10	serine and arginine-rich splicing factor 10
Pyurf	2.52937	7.70196	0.00900087	0.304544	yes	Pyurf	Pigy upstream reading frame
Gm40078	1.83659	8.2718	0.00904477	0.304544	yes	Gm40078	predicted gene, 40078
Gatc	1.97302	-7.28524	0.009047	0.304544	yes	Gatc	glutamyl-tRNA(Gln) amidotransferase, subunit C
Tefm	2.20218	7.9615	0.00906968	0.304544	yes	Tefm	transcription elongation factor, mitochondrial
Gm46829	1.27941	8.68846	0.00909187	0.304544	yes	Gm46829	predicted gene, 46829
Nefm	1.53153	8.48559	0.00911233	0.304544	yes	Nefm	neurofilament, medium polypeptide
Plxna4	2.4645	-6.66163	0.00911873	0.304544	yes	Plxna4	plexin A4
Exd2	0.338576	-8.72536	0.00911978	0.304544	yes	Exd2	exonuclease 3'-5' domain containing 2
Cops5	2.11346	8.03019	0.00913769	0.304544	yes	Cops5	COP9 signalosome subunit 5
Map3k7	2.06107	8.0721	0.00915727	0.304544	yes	Map3k7	mitogen-activated protein kinase kinase kinase 7
Lgals2	8.38048	2.23821	0.00916526	0.304544	yes	Lgals2	lectin, galactose-binding, soluble 2
Ccl8	0.0943916	-8.88242	0.00916782	0.304544	yes	Ccl8	chemokine (C-C motif) ligand 8
Tigd2	2.07127	8.06373	0.00916926	0.304544	yes	Tigd2	tigger transposable element derived 2
Phf20l1	4.27917	-4.36962	0.00917208	0.304544	yes	Phf20l1	PHD finger protein 20-like 1
Plcd1	3.3239	6.97819	0.00920574	0.304544	yes	Plcd1	phospholipase C, delta 1
Dtl	0.271147	-8.74591	0.00920931	0.304544	yes	Dtl	denticleless E3 ubiquitin protein ligase
Ccpg1	1.65458	8.36927	0.00921429	0.304544	yes	Ccpg1	cell cycle progression 1
Pomt1	2.02448	8.09483	0.00923586	0.304544	yes	Pomt1	protein-O-mannosyltransferase 1
Gm30802	0.0872681	-8.866	0.00928986	0.304544	yes	Gm30802	predicted gene, 30802
Nudt7	1.61822	8.38048	0.00929307	0.304544	yes	Nudt7	nudix hydrolase 7
Ctnnd1	1.83401	8.22875	0.00931798	0.304544	yes	Ctnnd1	catenin (cadherin associated protein), delta 1
Fam98a	0.526538	9.07219	0.00931868	0.304544	yes	Fam98a	family with sequence similarity 98, member A
Evi2a	0.673495	-8.54915	0.00931962	0.304544	yes	Evi2a	ecotropic viral integration site 2a
Gm12468	2.76355	6.4226	0.00934037	0.304544	yes	Gm12468	predicted gene 12468
Adgra2	1.93579	8.15649	0.00935129	0.304544	yes	Adgra2	adhesion G protein-coupled receptor A2
Gm38514	0.0553369	-8.88091	0.00935754	0.304544	yes	Gm38514	predicted gene, 38514
Slc26a6	8.48491	2.20831	0.00935972	0.304544	yes	Slc26a6	solute carrier family 26, member 6
Dennd2d	1.85692	8.20928	0.00936008	0.304544	yes	Dennd2d	DENN domain containing 2D
Pawr	0.902096	-8.38088	0.00936314	0.304544	yes	Pawr	PRKC, apoptosis, WT1, regulator
Gtpbp1	2.32047	7.8184	0.00938081	0.304544	yes	Gtpbp1	GTP binding protein 1
Hps6	1.65563	8.33888	0.00939047	0.304544	yes	Hps6	HPS6, biogenesis of lysosomal organelles complex 2 subunit 3
Cpne4	0.154922	-8.78617	0.00940663	0.304544	yes	Cpne4	copine IV
Trim14	2.21129	7.91158	0.00941039	0.304544	yes	Trim14	tripartite motif-containing 14
Hrc	1.28541	-8.17283	0.00942219	0.304544	yes	Hrc	histidine rich calcium binding protein
Ahnak	7.64886	-2.41665	0.00943197	0.304544	yes	Ahnak	AHNAK nucleoprotein (desmoyokin)
Cox6a1	9.69886	1.9648	0.00944607	0.304544	yes	Cox6a1	cytochrome c oxidase subunit 6A1
Khnyn	1.66035	8.32762	0.00944615	0.304544	yes	Khnyn	KH and NYN domain containing
Gm10044	0.075075	-8.8456	0.00946112	0.304544	yes	Gm10044	predicted gene 10044
Cep135	0.980144	-8.31491	0.00946983	0.304544	yes	Cep135	centrosomal protein 135
Gm39932	0.0667241	-8.84462	0.00947884	0.304544	yes	Gm39932	predicted gene, 39932
Ccdc121	0.0609668	-8.84461	0.00950521	0.304544	yes	Ccdc121	coiled-coil domain containing 121
Tmem139	2.40282	7.7353	0.00952222	0.304544	yes	Tmem139	transmembrane protein 139
Reep6	6.72653	2.71503	0.00954048	0.304544	yes	Reep6	receptor accessory protein 6
Nol9	2.21375	7.88468	0.00955213	0.304544	yes	Nol9	nucleolar protein 9
Msh5	1.50228	-7.82496	0.00956094	0.304544	yes	Msh5	mutS homolog 5
Zfp84	1.86406	8.1738	0.00957341	0.304544	yes	Zfp84	zinc finger protein 84
Gm26799	0.448314	-8.58124	0.00963709	0.304544	yes	Gm26799	predicted gene, 26799
Lcmt2	1.72163	8.25498	0.00963847	0.304544	yes	Lcmt2	leucine carboxyl methyltransferase 2
Fbxl3	2.32438	7.77989	0.00964302	0.304544	yes	Fbxl3	F-box and leucine-rich repeat protein 3
Gm13570	2.28744	7.81011	0.00965121	0.304544	yes	Gm13570	predicted gene 13570
Tyro3	1.57307	8.35654	0.00965991	0.304544	yes	Tyro3	TYRO3 protein tyrosine kinase 3
H2-Q9	0.885607	8.79901	0.00967155	0.304544	yes	H2-Q9	histocompatibility 2, Q region locus 9
Cox18	2.44829	7.67019	0.00971344	0.304544	yes	Cox18	cytochrome c oxidase assembly protein 18
Gm16217	1.86874	8.148	0.00972554	0.304544	yes	Gm16217	predicted gene 16217
P2rx6	0.888645	8.78471	0.00973421	0.304544	yes	P2rx6	purinergic receptor P2X, ligand-gated ion channel, 6
Gm4036	3.16486	-6.61882	0.00976291	0.304544	yes	Gm4036	predicted gene 4036
Ndufs5-ps	7.94196	2.32517	0.00976748	0.304544	yes	Ndufs5-ps	NADH:ubiquinone oxidoreductase core subunit S5, pseudogene
Sec24a	2.51911	7.60858	0.0097716	0.304544	yes	Sec24a	Sec24 related gene family, member A (S. cerevisiae)
Mok	1.20827	8.60583	0.00979001	0.304544	yes	Mok	MOK protein kinase
6430590A07Rik	1.60687	8.3127	0.00979271	0.304544	yes	6430590A07Rik	RIKEN cDNA 6430590A07 gene
Adgrg1	1.73818	8.22686	0.0098195	0.304544	yes	Adgrg1	adhesion G protein-coupled receptor G1
Plpp7	0.542798	8.97271	0.00983372	0.304544	yes	Plpp7	phospholipid phosphatase 7 (inactive)
Gm2423	2.30929	7.76883	0.00984089	0.304544	yes	Gm2423	predicted gene 2423
Igf2bp3	1.75965	8.21127	0.00984155	0.304544	yes	Igf2bp3	insulin-like growth factor 2 mRNA binding protein 3
Slc39a5	7.30109	2.50201	0.00985621	0.304544	yes	Slc39a5	solute carrier family 39 (metal ion transporter), member 5
Gm40780	0.696482	8.8999	0.00987229	0.304544	yes	Gm40780	predicted gene, 40780
Plpp5	2.70963	6.61792	0.00987399	0.304544	yes	Plpp5	phospholipid phosphatase 5
Fxyd3	0.265607	9.09047	0.00988007	0.304544	yes	Fxyd3	FXYD domain-containing ion transport regulator 3
Tulp4	2.14862	7.89604	0.0098816	0.304544	yes	Tulp4	tubby like protein 4
Ovol2	2.52536	7.59023	0.00988874	0.304544	yes	Ovol2	ovo like zinc finger 2
Lyz1	8.50174	-2.18687	0.00990464	0.304544	yes	Lyz1	lysozyme 1
Cyp2t4	0.513226	-8.50119	0.00990755	0.304544	yes	Cyp2t4	cytochrome P450, family 2, subfamily t, polypeptide 4
Mid1	1.20849	-8.11513	0.00991275	0.304544	yes	Mid1	midline 1
Gm33118	2.2445	7.8162	0.00991312	0.304544	yes	Gm33118	predicted gene, 33118
Zfp580	0.481927	8.97937	0.00991519	0.304544	yes	Zfp580	zinc finger protein 580
Prc1	1.4877	8.38049	0.00992496	0.304544	yes	Prc1	protein regulator of cytokinesis 1
Dennd1b	2.51221	7.59397	0.0099506	0.304544	yes	Dennd1b	DENN domain containing 1B
Ldah	2.95209	7.21148	0.00996513	0.304544	yes	Ldah	lipid droplet associated hydrolase
Slc5a3	1.53576	8.34617	0.00996719	0.304544	yes	Slc5a3	solute carrier family 5 (inositol transporters), member 3
Tsen15	0.882869	-8.27921	0.00997522	0.304544	yes	Tsen15	tRNA splicing endonuclease subunit 15
Ttc39c	2.72578	7.40308	0.00998595	0.304544	yes	Ttc39c	tetratricopeptide repeat domain 39C
Gm52385	1.62435	8.26943	0.0100496	0.305967	yes	Gm52385	predicted gene, 52385
Nes	2.02264	7.97561	0.0100605	0.305967	yes	Nes	nestin
Lrig1	1.4869	8.36336	0.01009	0.30614	yes	Lrig1	leucine-rich repeats and immunoglobulin-like domains 1
Lyrm7	0.734553	8.83165	0.0100954	0.30614	yes	Lyrm7	LYR motif containing 7
Nrp2	3.68906	-4.94781	0.010108	0.30614	yes	Nrp2	neuropilin 2
Spry2	1.13071	8.58368	0.0101335	0.306245	yes	Spry2	sprouty RTK signaling antagonist 2
Caml	2.01761	7.96975	0.0101718	0.306245	yes	Caml	calcium modulating ligand
Nat14	2.10547	7.89963	0.0101831	0.306245	yes	Nat14	N-acetyltransferase 14
Rdh7	3.35457	5.57501	0.0101833	0.306245	yes	Rdh7	retinol dehydrogenase 7
Gm45502	1.02833	8.62975	0.0101847	0.306245	yes	Gm45502	predicted gene 45502
Igfbp2	1.32536	8.47075	0.0102264	0.306245	yes	Igfbp2	insulin-like growth factor binding protein 2
Gm15337	1.13336	8.56282	0.0102563	0.306245	yes	Gm15337	predicted gene 15337
Tcf7l1	2.76819	7.33579	0.0102656	0.306245	yes	Tcf7l1	transcription factor 7 like 1 (T cell specific, HMG box)
Elapor1	1.56376	8.2704	0.0102746	0.306245	yes	Elapor1	endosome-lysosome associated apoptosis and autophagy regulator 1
AI837181	3.4937	5.51534	0.0102805	0.306245	yes	AI837181	expressed sequence AI837181
Arhgap32	4.66812	3.9808	0.0102997	0.306245	yes	Arhgap32	Rho GTPase activating protein 32
Lta4h	1.97066	7.98633	0.0103264	0.306245	yes	Lta4h	leukotriene A4 hydrolase
Mrpl32	2.52756	7.53116	0.0103423	0.306245	yes	Mrpl32	mitochondrial ribosomal protein L32
Hoxb3	0.796607	-8.28129	0.0103626	0.306245	yes	Hoxb3	homeobox B3
Klk1	3.96239	5.02658	0.0103654	0.306245	yes	Klk1	kallikrein 1
Gm36589	0.605024	8.85486	0.0104033	0.306245	yes	Gm36589	predicted gene, 36589
Ifih1	2.50439	7.54203	0.0104375	0.306245	yes	Ifih1	interferon induced with helicase C domain 1
Prr36	0.221379	-8.54854	0.0104467	0.306245	yes	Prr36	proline rich 36
Sgsm1	1.08077	8.55813	0.0104604	0.306245	yes	Sgsm1	small G protein signaling modulator 1
Med25	1.8905	8.03007	0.0104606	0.306245	yes	Med25	mediator complex subunit 25
Cux2	2.6316	6.66701	0.0104752	0.306245	yes	Cux2	cut-like homeobox 2
Tbkbp1	0.875089	-8.21048	0.0104823	0.306245	yes	Tbkbp1	TBK1 binding protein 1
Zfp946	0.407508	-8.43904	0.0105089	0.306245	yes	Zfp946	zinc finger protein 946
Gstm7	2.12978	7.82352	0.0105236	0.306245	yes	Gstm7	glutathione S-transferase, mu 7
Cela2a	0.147259	9.0526	0.0105314	0.306245	yes	Cela2a	chymotrypsin-like elastase family, member 2A
Mapk6	1.66474	8.1624	0.0105396	0.306245	yes	Mapk6	mitogen-activated protein kinase 6
Mn1	0.158617	-8.57175	0.0105577	0.306245	yes	Mn1	meningioma 1
Rec8	1.34872	8.40368	0.0105635	0.306245	yes	Rec8	REC8 meiotic recombination protein
Heph	1.28807	8.44418	0.0106119	0.306245	yes	Heph	hephaestin
Tmem164	2.97645	7.12171	0.0106173	0.306245	yes	Tmem164	transmembrane protein 164
1110059G10Rik	3.21022	6.93112	0.0106203	0.306245	yes	1110059G10Rik	RIKEN cDNA 1110059G10 gene
Vnn1	2.19362	7.75591	0.0106339	0.306245	yes	Vnn1	vanin 1
Ptprd	1.48145	-7.81866	0.010643	0.306245	yes	Ptprd	protein tyrosine phosphatase, receptor type, D
Ccdc134	1.98833	7.92717	0.0106537	0.306245	yes	Ccdc134	coiled-coil domain containing 134
Naa25	2.37911	7.60983	0.0106625	0.306245	yes	Naa25	N(alpha)-acetyltransferase 25, NatB auxiliary subunit
Trim3	1.45354	8.30019	0.0106626	0.306245	yes	Trim3	tripartite motif-containing 3
Ly6m	6.06888	-3.20352	0.0106679	0.306245	yes	Ly6m	lymphocyte antigen 6 complex, locus M
Ep300	1.97359	7.9393	0.0107048	0.306245	yes	Ep300	E1A binding protein p300
Zfp69	1.61431	-7.71229	0.0107392	0.306245	yes	Zfp69	zinc finger protein 69
Vma21	2.91918	7.16982	0.0107518	0.306245	yes	Vma21	VMA21 vacuolar H+-ATPase homolog (S. cerevisiae)
Gm53343	0.193086	8.97326	0.0108088	0.306245	yes	Gm53343	predicted gene, 53343
Gpr180	0.374655	-8.40046	0.0108302	0.306245	yes	Gpr180	G protein-coupled receptor 180
Reg3a	2.01137	7.88271	0.0108462	0.306245	yes	Reg3a	regenerating islet-derived 3 alpha
Bloc1s6	2.72193	6.52357	0.0108636	0.306245	yes	Bloc1s6	biogenesis of lysosomal organelles complex-1, subunit 6, pallidin
Hpgd	2.52924	7.46603	0.0108851	0.306245	yes	Hpgd	hydroxyprostaglandin dehydrogenase 15 (NAD)
Tra2a	2.05	7.85643	0.0109028	0.306245	yes	Tra2a	transformer 2 alpha
Hpn	0.230025	8.93187	0.0109162	0.306245	yes	Hpn	hepsin
Chd7	8.18684	-2.22267	0.0109304	0.306245	yes	Chd7	chromodomain helicase DNA binding protein 7
Gm30251	0.569554	8.77938	0.0109307	0.306245	yes	Gm30251	predicted gene, 30251
Tspan1	3.57405	5.08905	0.0109458	0.306245	yes	Tspan1	tetraspanin 1
Hspb6	2.18029	7.72324	0.0109841	0.306245	yes	Hspb6	heat shock protein, alpha-crystallin-related, B6
Gm4924	1.89605	7.95026	0.011037	0.306245	yes	Gm4924	predicted gene 4924
Cdkal1	2.0901	7.79293	0.0110516	0.306245	yes	Cdkal1	CDK5 regulatory subunit associated protein 1-like 1
Cog1	4.25917	4.34267	0.0110644	0.306245	yes	Cog1	component of oligomeric golgi complex 1
Zbtb48	2.10172	7.1059	0.0110924	0.306245	yes	Zbtb48	zinc finger and BTB domain containing 48
Smim24	7.60327	2.37293	0.0110942	0.306245	yes	Smim24	small integral membrane protein 24
Adamtsl1	0.538106	-8.29264	0.0111068	0.306245	yes	Adamtsl1	ADAMTS-like 1
Cdhr1	-0.104259	-8.61692	0.0111336	0.306245	yes	Cdhr1	cadherin-related family member 1
Jhy	0.301308	-8.38727	0.0111349	0.306245	yes	Jhy	junctional cadherin complex regulator
Gsr	1.85481	7.96407	0.0111353	0.306245	yes	Gsr	glutathione reductase
Gm53457	0.965307	-8.05769	0.0111394	0.306245	yes	Gm53457	predicted gene, 53457
Plppr1	0.0842134	8.99368	0.011165	0.306245	yes	Plppr1	phospholipid phosphatase related 1
Gm14402	3.05063	6.15052	0.011171	0.306245	yes	Gm14402	predicted gene 14402
Gmip	3.08332	6.11119	0.011202	0.306245	yes	Gmip	Gem-interacting protein
Ipo4	3.65296	4.99886	0.0112231	0.306245	yes	Ipo4	importin 4
Cep162	1.96986	7.86725	0.0112462	0.306245	yes	Cep162	centrosomal protein 162
Scyl2	2.06655	7.78646	0.0112471	0.306245	yes	Scyl2	SCY1-like 2 (S. cerevisiae)
Nat8f1	2.14511	7.72188	0.0112519	0.306245	yes	Nat8f1	N-acetyltransferase 8 (GCN5-related) family member 1
Usp15	2.82692	7.18135	0.0112613	0.306245	yes	Usp15	ubiquitin specific peptidase 15
Slc35e4	0.769805	8.61892	0.0112713	0.306245	yes	Slc35e4	solute carrier family 35, member E4
Nup160	1.34778	8.29087	0.0113008	0.306245	yes	Nup160	nucleoporin 160
Ssr4	7.12592	2.50376	0.0113109	0.306245	yes	Ssr4	signal sequence receptor, delta
Fam83f	3.98173	4.55782	0.0113236	0.306245	yes	Fam83f	family with sequence similarity 83, member F
Tmem163	-0.0130319	-8.56353	0.0113256	0.306245	yes	Tmem163	transmembrane protein 163
Epn2	2.74006	7.24167	0.0113537	0.306245	yes	Epn2	epsin 2
Pitx2	1.73814	8.00396	0.0113732	0.306245	yes	Pitx2	paired-like homeodomain transcription factor 2
H2ac18	4.19196	6.08982	0.0113917	0.306245	yes	H2ac18	H2A clustered histone 18
Wnk2	1.46861	8.1836	0.0113956	0.306245	yes	Wnk2	WNK lysine deficient protein kinase 2
Gm52822	0.26241	-8.36069	0.0114339	0.306245	yes	Gm52822	predicted gene, 52822
Gm10785	0.0234717	-8.52991	0.0114607	0.306245	yes	Gm10785	predicted gene 10785
Plcb4	1.37944	-7.79216	0.0114642	0.306245	yes	Plcb4	phospholipase C, beta 4
Slc30a1	2.20463	7.6452	0.0114775	0.306245	yes	Slc30a1	solute carrier family 30 (zinc transporter), member 1
Ncoa2	2.30224	7.57323	0.0114812	0.306245	yes	Ncoa2	nuclear receptor coactivator 2
Rbm34	1.1901	8.35102	0.0114938	0.306245	yes	Rbm34	RNA binding motif protein 34
Calr	9.18482	2.00427	0.0114999	0.306245	yes	Calr	calreticulin
Tram1	1.89142	7.8892	0.0115235	0.306245	yes	Tram1	translocating chain-associating membrane protein 1
AW209491	0.399272	-8.27832	0.0115295	0.306245	yes	AW209491	expressed sequence AW209491
Zfp459	-0.190561	-8.5918	0.0115297	0.306245	yes	Zfp459	zinc finger protein 459
Zwint	1.63528	8.04792	0.0115348	0.306245	yes	Zwint	ZW10 interactor
Ddah1	2.87189	7.11686	0.0115367	0.306245	yes	Ddah1	dimethylarginine dimethylaminohydrolase 1
Xrra1	-0.144636	-8.55975	0.0115687	0.306245	yes	Xrra1	X-ray radiation resistance associated 1
Tcf15	0.143082	-8.41304	0.0115828	0.306245	yes	Tcf15	transcription factor 15
Gm19461	-0.0703358	-8.53498	0.0115942	0.306245	yes	Gm19461	predicted gene, 19461
Ifit3	2.12438	-6.95175	0.0116058	0.306245	yes	Ifit3	interferon-induced protein with tetratricopeptide repeats 3
Rin2	1.61647	8.05814	0.0116358	0.306245	yes	Rin2	Ras and Rab interactor 2
Utp4	0.229627	-8.34719	0.0116414	0.306245	yes	Utp4	UTP4 small subunit processome component
Entpd4b	-0.184337	-8.56724	0.0116418	0.306245	yes	Entpd4b	ectonucleoside triphosphate diphosphohydrolase 4B
Usp43	1.6168	8.05625	0.0116514	0.306245	yes	Usp43	ubiquitin specific peptidase 43
Ino80dos	0.0624385	8.93218	0.0116531	0.306245	yes	Ino80dos	INO80 complex subunit D, opposite strand
Pcm1	2.03951	7.75939	0.0116611	0.306245	yes	Pcm1	pericentriolar material 1
Rab18	2.33358	7.52038	0.0116946	0.306245	yes	Rab18	RAB18, member RAS oncogene family
Gm46809	-0.115505	-8.52439	0.011717	0.306245	yes	Gm46809	predicted gene, 46809
Lrrfip1	7.91345	-2.26909	0.0117248	0.306245	yes	Lrrfip1	leucine rich repeat (in FLII) interacting protein 1
Kif2c	2.69031	6.42789	0.0117442	0.306245	yes	Kif2c	kinesin family member 2C
Gm15983	2.19235	7.62475	0.011753	0.306245	yes	Gm15983	predicted gene 15983
Nat8	4.86443	3.7053	0.011783	0.306245	yes	Nat8	N-acetyltransferase 8 (GCN5-related)
Sntg2	1.7635	7.9449	0.0118116	0.306245	yes	Sntg2	syntrophin, gamma 2
Gm31349	0.794554	-8.05811	0.0118213	0.306245	yes	Gm31349	predicted gene, 31349
Fgfr3	2.46815	7.40782	0.0118214	0.306245	yes	Fgfr3	fibroblast growth factor receptor 3
Plekha1	2.04463	7.73555	0.011824	0.306245	yes	Plekha1	pleckstrin homology domain containing, family A (phosphoinositide binding specific) member 1
1700097N02Rik	1.90659	7.84338	0.0118284	0.306245	yes	1700097N02Rik	RIKEN cDNA 1700097N02 gene
Cdkn1b	0.953445	8.42476	0.0118287	0.306245	yes	Cdkn1b	cyclin-dependent kinase inhibitor 1B
Gm30706	-0.132577	-8.51085	0.0118562	0.306245	yes	Gm30706	predicted gene, 30706
Slc22a17	0.673192	8.60287	0.0118613	0.306245	yes	Slc22a17	solute carrier family 22 (organic cation transporter), member 17
Gpr153	0.0211635	-8.46354	0.0118616	0.306245	yes	Gpr153	G protein-coupled receptor 153
Tomm70a	2.1938	7.60694	0.0119013	0.306245	yes	Tomm70a	translocase of outer mitochondrial membrane 70A
Zbtb32	1.72062	7.94893	0.0119127	0.306245	yes	Zbtb32	zinc finger and BTB domain containing 32
Thumpd2	0.364593	-8.23513	0.0119162	0.306245	yes	Thumpd2	THUMP domain containing 2
Tmem186	2.47641	7.39464	0.0119263	0.306245	yes	Tmem186	transmembrane protein 186
Cyp2b10	3.42147	5.47544	0.0119306	0.306245	yes	Cyp2b10	cytochrome P450, family 2, subfamily b, polypeptide 10
4932702P03Rik	2.14335	7.65548	0.0119614	0.306245	yes	4932702P03Rik	RIKEN cDNA 4932702P03 gene
Efnb3	0.0637519	-8.4129	0.0119707	0.306245	yes	Efnb3	ephrin B3
Creb3l2	1.84258	7.87225	0.0119761	0.306245	yes	Creb3l2	cAMP responsive element binding protein 3-like 2
Ssbp2	1.76574	7.9234	0.0119769	0.306245	yes	Ssbp2	single-stranded DNA binding protein 2
Ecm2	0.292536	8.72954	0.011981	0.306245	yes	Ecm2	extracellular matrix protein 2, female organ and adipocyte specific
Arel1	2.33308	7.49241	0.0119896	0.306245	yes	Arel1	apoptosis resistant E3 ubiquitin protein ligase 1
Gbgt1	0.15036	-8.34985	0.0120016	0.306245	yes	Gbgt1	globoside alpha-1,3-N-acetylgalactosaminyltransferase 1
Phox2b	1.31685	8.22786	0.0120023	0.306245	yes	Phox2b	paired-like homeobox 2b
Rps6kc1	2.51403	7.35616	0.0120072	0.306245	yes	Rps6kc1	ribosomal protein S6 kinase polypeptide 1
Itgal	1.5671	8.03561	0.0120118	0.306245	yes	Itgal	integrin alpha L
Cnksr3	0.893871	8.4338	0.0120123	0.306245	yes	Cnksr3	Cnksr family member 3
Washc3	3.68929	4.88905	0.0120221	0.306245	yes	Washc3	WASH complex subunit 3
Mrm3	2.20306	7.58608	0.012027	0.306245	yes	Mrm3	mitochondrial rRNA methyltransferase 3
Cnbp	2.59865	7.2866	0.0120367	0.306245	yes	Cnbp	cellular nucleic acid binding protein
Myzap	1.90186	7.82308	0.0120402	0.306245	yes	Myzap	myocardial zonula adherens protein
Plcd3	0.458666	-8.17569	0.012057	0.306245	yes	Plcd3	phospholipase C, delta 3
Elk1	1.43207	8.12062	0.0120716	0.306245	yes	Elk1	ELK1, member of ETS oncogene family
Clvs1	-0.166668	-8.48898	0.0120761	0.306245	yes	Clvs1	clavesin 1
Spock2	1.3284	8.20261	0.0120917	0.306245	yes	Spock2	sparc/osteonectin, cwcv and kazal-like domains proteoglycan 2
Lrrc26	2.30646	7.50123	0.0120935	0.306245	yes	Lrrc26	leucine rich repeat containing 26
Mcpt4	1.00627	8.34963	0.0121142	0.306245	yes	Mcpt4	mast cell protease 4
Trim72	0.626965	8.57639	0.0121775	0.306245	yes	Trim72	tripartite motif-containing 72
Nr4a1	2.58678	6.5381	0.01218	0.306245	yes	Nr4a1	nuclear receptor subfamily 4, group A, member 1
Psmd6	1.8104	7.86467	0.0121945	0.306245	yes	Psmd6	proteasome (prosome, macropain) 26S subunit, non-ATPase, 6
Gnai3	1.39927	8.13768	0.0121994	0.306245	yes	Gnai3	guanine nucleotide binding protein (G protein), alpha inhibiting 3
Prkn	2.3359	7.4636	0.0122071	0.306245	yes	Prkn	parkin RBR E3 ubiquitin protein ligase
Mocs2	2.19228	7.57352	0.0122123	0.306245	yes	Mocs2	molybdenum cofactor synthesis 2
Lman2l	0.512285	-8.13892	0.0122269	0.306245	yes	Lman2l	lectin, mannose-binding 2-like
Gm31399	-0.0671721	-8.42558	0.0122425	0.306245	yes	Gm31399	predicted gene, 31399
Col6a2	4.42981	5.83472	0.0122493	0.306245	yes	Col6a2	collagen, type VI, alpha 2
Pradc1	1.34623	8.17486	0.0122528	0.306245	yes	Pradc1	protease-associated domain containing 1
Prickle3	2.64138	7.23017	0.0122692	0.306245	yes	Prickle3	prickle planar cell polarity protein 3
Trp53rka	1.84074	7.83033	0.0123106	0.306245	yes	Trp53rka	transformation related protein 53 regulating kinase A
Phtf1	1.60134	7.97315	0.0123256	0.306245	yes	Phtf1	putative homeodomain transcription factor 1
Mrps31	2.35368	7.43771	0.0123291	0.306245	yes	Mrps31	mitochondrial ribosomal protein S31
Npy	1.40419	8.10715	0.0123318	0.306245	yes	Npy	neuropeptide Y
H2bc12	1.04336	8.30116	0.0123383	0.306245	yes	H2bc12	H2B clustered histone 12
Prdm10	2.6233	7.23143	0.0123913	0.306245	yes	Prdm10	PR domain containing 10
B230369F24Rik	1.08479	8.27999	0.0124064	0.306245	yes	B230369F24Rik	RIKEN cDNA B230369F24 gene
Slc27a1	2.89821	7.00903	0.0124129	0.306245	yes	Slc27a1	solute carrier family 27 (fatty acid transporter), member 1
4833418N02Rik	1.09874	8.27272	0.0124131	0.306245	yes	4833418N02Rik	RIKEN cDNA 4833418N02 gene
Mtfmt	1.56163	7.98887	0.0124339	0.306245	yes	Mtfmt	mitochondrial methionyl-tRNA formyltransferase
Adrb3	1.94207	7.76498	0.012456	0.306245	yes	Adrb3	adrenergic receptor, beta 3
Dhcr7	4.80321	3.71898	0.012457	0.306245	yes	Dhcr7	7-dehydrocholesterol reductase
Agmat	2.70742	7.15422	0.0124606	0.306245	yes	Agmat	agmatine ureohydrolase (agmatinase)
Sema6c	0.148686	-8.2826	0.0124607	0.306245	yes	Sema6c	sema domain, transmembrane domain (TM), and cytoplasmic domain, (semaphorin) 6C
Hadhb	4.76415	3.75402	0.0124633	0.306245	yes	Hadhb	hydroxyacyl-CoA dehydrogenase trifunctional multienzyme complex subunit beta
Yipf6	1.99746	7.69821	0.0124812	0.306245	yes	Yipf6	Yip1 domain family, member 6
Fam120c	1.51043	8.02237	0.0124832	0.306245	yes	Fam120c	family with sequence similarity 120, member C
Aldh18a1	2.64088	7.20372	0.0125109	0.306245	yes	Aldh18a1	aldehyde dehydrogenase 18 family, member A1
Wapl	1.63637	7.9246	0.0125202	0.306245	yes	Wapl	WAPL cohesin release factor
Slc10a3	1.66021	7.90908	0.0125233	0.306245	yes	Slc10a3	solute carrier family 10 (sodium/bile acid cotransporter family), member 3
Armh3	3.96475	4.60839	0.0125263	0.306245	yes	Armh3	armadillo-like helical domain containing 3
Dld	2.46643	7.33241	0.0125458	0.306245	yes	Dld	dihydrolipoamide dehydrogenase
Commd10	2.13106	7.58444	0.0125568	0.306245	yes	Commd10	COMM domain containing 10
Txndc15	1.77719	7.83331	0.0125761	0.306245	yes	Txndc15	thioredoxin domain containing 15
2010204K13Rik	-0.110851	-8.39096	0.0125801	0.306245	yes	2010204K13Rik	RIKEN cDNA 2010204K13 gene
Fads1	2.60719	6.42937	0.012648	0.307184	yes	Fads1	fatty acid desaturase 1
Gm11454	-0.201578	-8.41256	0.0126636	0.307184	yes	Gm11454	predicted gene 11454
Foxd2os	0.392856	-8.1134	0.0126733	0.307184	yes	Foxd2os	forkhead box D2, opposite strand
Itpa	1.88381	7.75619	0.0127063	0.307184	yes	Itpa	inosine triphosphatase (nucleoside triphosphate pyrophosphatase)
Capn13	1.56045	7.95027	0.0127229	0.307184	yes	Capn13	calpain 13
Ighv1-59	-0.00124209	-8.33321	0.0127478	0.307184	yes	Ighv1-59	immunoglobulin heavy variable V1-59
Gm52119	0.314009	8.60584	0.012756	0.307184	yes	Gm52119	predicted gene, 52119
Itgax	0.260937	-8.166	0.0127683	0.307184	yes	Itgax	integrin alpha X
Pigg	2.51399	7.27661	0.0127741	0.307184	yes	Pigg	phosphatidylinositol glycan anchor biosynthesis, class G
Pigl	1.93591	7.71333	0.0128033	0.307184	yes	Pigl	phosphatidylinositol glycan anchor biosynthesis, class L
Arid4a	7.60739	-2.31729	0.0128365	0.307184	yes	Arid4a	AT rich interactive domain 4A (RBP1-like)
Hdx	1.12141	8.20259	0.0128843	0.307184	yes	Hdx	highly divergent homeobox
Kcng1	1.27742	8.14228	0.0128855	0.307184	yes	Kcng1	potassium voltage-gated channel, subfamily G, member 1
Dcps	1.89552	7.73165	0.0128887	0.307184	yes	Dcps	decapping enzyme, scavenger
Ppp1r9a	3.74411	4.7957	0.0128913	0.307184	yes	Ppp1r9a	protein phosphatase 1, regulatory subunit 9A
Trappc1	0.556088	8.48483	0.0129206	0.307184	yes	Trappc1	trafficking protein particle complex 1
Gm33178	2.18106	7.50814	0.0129239	0.307184	yes	Gm33178	predicted gene, 33178
LOC118568655	1.35792	-7.60742	0.0129342	0.307184	yes	LOC118568655	uncharacterized LOC118568655
Il21r	3.56231	-4.86854	0.0129383	0.307184	yes	Il21r	interleukin 21 receptor
Pyroxd2	2.26639	7.43814	0.0129533	0.307184	yes	Pyroxd2	pyridine nucleotide-disulphide oxidoreductase domain 2
Elf3	8.84123	2.03362	0.0129536	0.307184	yes	Elf3	E74-like factor 3
Frrs1	2.03864	7.61185	0.0129617	0.307184	yes	Frrs1	ferric-chelate reductase 1
Pou5f2	1.98222	7.65751	0.0129647	0.307184	yes	Pou5f2	POU domain class 5, transcription factor 2
Mybpc2	-0.0929108	-8.3251	0.0129683	0.307184	yes	Mybpc2	myosin binding protein C, fast-type
Zfp36l2	1.71648	7.83154	0.012981	0.307184	yes	Zfp36l2	zinc finger protein 36, C3H type-like 2
Plch2	2.49178	7.27796	0.0129824	0.307184	yes	Plch2	phospholipase C, eta 2
Cep295	1.54082	7.93715	0.013028	0.307713	yes	Cep295	centrosomal protein 295
Nbr1	1.81401	7.75667	0.0130424	0.307713	yes	Nbr1	NBR1, autophagy cargo receptor
Arfip2	3.84976	4.59788	0.0130468	0.307713	yes	Arfip2	ADP-ribosylation factor interacting protein 2
Noxa1	1.99372	7.64328	0.0130625	0.307754	yes	Noxa1	NADPH oxidase activator 1
Gm9199	1.64921	7.86157	0.0130867	0.307993	yes	Gm9199	predicted gene 9199
Rab15	1.53461	7.93411	0.0131063	0.308123	yes	Rab15	RAB15, member RAS oncogene family
Ccl20	1.43196	7.98767	0.0131624	0.309113	yes	Ccl20	chemokine (C-C motif) ligand 20
St6galnac3	1.03221	8.19653	0.0131994	0.30965	yes	St6galnac3	ST6 (alpha-N-acetyl-neuraminyl-2,3-beta-galactosyl-1,3)-N-acetylgalactosaminide alpha-2,6-sialyltransferase 3
Fbxo44	1.74636	7.78323	0.0132208	0.309822	yes	Fbxo44	F-box protein 44
Gm35562	3.04612	-5.46513	0.0132673	0.310317	yes	Gm35562	predicted gene, 35562
Vamp3	1.91228	7.67697	0.0132772	0.310317	yes	Vamp3	vesicle-associated membrane protein 3
Anapc16	3.50354	5.10514	0.0132843	0.310317	yes	Anapc16	anaphase promoting complex subunit 16
Mturn	0.244539	-8.09715	0.0133062	0.310497	yes	Mturn	maturin, neural progenitor differentiation regulator homolog (Xenopus)
Ntan1	1.90206	7.67456	0.0133686	0.311622	yes	Ntan1	N-terminal Asn amidase
Myrfl	2.15435	7.49414	0.0134189	0.312417	yes	Myrfl	myelin regulatory factor-like
Tubgcp2	1.31643	8.0428	0.0134312	0.312417	yes	Tubgcp2	tubulin, gamma complex associated protein 2
Nifk	1.24204	8.07784	0.0134816	0.31308	yes	Nifk	nucleolar protein interacting with the FHA domain of MKI67
E130215H24Rik	-0.0439702	8.70589	0.0134882	0.31308	yes	E130215H24Rik	RIKEN cDNA E130215H24 gene
Scarf2	1.94998	7.63201	0.0135532	0.314258	yes	Scarf2	scavenger receptor class F, member 2
Zfp280d	-0.103737	-8.24822	0.0135828	0.314353	yes	Zfp280d	zinc finger protein 280D
mt-Rnr1	13.7861	-2.88141	0.013586	0.314353	yes	mt-Rnr1	s-rRNA
Melk	1.92396	7.63443	0.0136168	0.314477	yes	Melk	maternal embryonic leucine zipper kinase
Col15a1	1.98119	7.58813	0.01362	0.314477	yes	Col15a1	collagen, type XV, alpha 1
4921515G04Rik	0.476163	-7.95677	0.0136401	0.31461	yes	4921515G04Rik	RIKEN cDNA 4921515G04 gene
Smarca2	7.36099	-2.36055	0.0136564	0.314657	yes	Smarca2	SWI/SNF related, matrix associated, actin dependent regulator of chromatin, subfamily a, member 2
Zfp521	0.0676962	-8.15964	0.0136979	0.31526	yes	Zfp521	zinc finger protein 521
Ccl9	1.88407	7.64803	0.0137207	0.31526	yes	Ccl9	chemokine (C-C motif) ligand 9
Msantd4	1.80139	7.70016	0.0137257	0.31526	yes	Msantd4	Myb/SANT-like DNA-binding domain containing 4 with coiled-coils
Morc2a	1.16151	-7.62018	0.0137547	0.315597	yes	Morc2a	microrchidia 2A
Thoc2l	1.52665	7.85379	0.0138078	0.315778	yes	Thoc2l	THO complex subunit 2-like
Myl4	5.86864	-2.90734	0.0138091	0.315778	yes	Myl4	myosin, light polypeptide 4
Slc39a3	4.02966	4.45182	0.0138116	0.315778	yes	Slc39a3	solute carrier family 39 (zinc transporter), member 3
Tbc1d25	1.71798	7.73068	0.0138201	0.315778	yes	Tbc1d25	TBC1 domain family, member 25
Arhgap15	-0.0404282	-8.19009	0.0138471	0.316066	yes	Arhgap15	Rho GTPase activating protein 15
Pkp2	0.587483	-7.89096	0.0138671	0.316194	yes	Pkp2	plakophilin 2
Gm32574	1.04253	8.10931	0.0139606	0.317994	yes	Gm32574	predicted gene, 32574
Gm36027	2.30045	7.31815	0.0139772	0.318043	yes	Gm36027	predicted gene, 36027
Mto1	1.76437	7.68276	0.0140012	0.31826	yes	Mto1	mitochondrial tRNA translation optimization 1
Dscam	-0.268571	-8.24861	0.0140431	0.318755	yes	Dscam	DS cell adhesion molecule
Meak7	1.58323	7.79779	0.0140611	0.318755	yes	Meak7	MTOR associated protein, eak-7 homolog
Cdkn1c	1.85047	7.62889	0.0140666	0.318755	yes	Cdkn1c	cyclin-dependent kinase inhibitor 1C (P57)
Smoc2	1.97344	7.54853	0.0140945	0.319058	yes	Smoc2	SPARC related modular calcium binding 2
Tjp1	2.80777	5.70907	0.0141172	0.319243	yes	Tjp1	tight junction protein 1
Rhbdf1	2.46048	7.18413	0.0141379	0.319384	yes	Rhbdf1	rhomboid 5 homolog 1
Uri1	1.17272	8.02435	0.0141891	0.319881	yes	Uri1	URI1, prefoldin-like chaperone
Gstp-ps	8.92597	1.98797	0.0142273	0.319881	yes	Gstp-ps	glutathione S-transferase, pi, pseudogene
Gm34091	0.227165	-7.98459	0.0142667	0.319881	yes	Gm34091	predicted gene, 34091
Gbp3	1.60558	7.75067	0.014269	0.319881	yes	Gbp3	guanylate binding protein 3
1700037C18Rik	1.71203	7.69614	0.0142696	0.319881	yes	1700037C18Rik	RIKEN cDNA 1700037C18 gene
Xpnpep3	3.41475	6.44769	0.0142936	0.319881	yes	Xpnpep3	X-prolyl aminopeptidase 3, mitochondrial
Catspere2	1.50358	7.81239	0.0142948	0.319881	yes	Catspere2	cation channel sperm associated auxiliary subunit epsilon 2
Il11ra2	0.491929	-7.86974	0.0142949	0.319881	yes	Il11ra2	interleukin 11 receptor, alpha chain 2
Prmt3	1.72277	-6.81912	0.0143021	0.319881	yes	Prmt3	protein arginine N-methyltransferase 3
Cep78	0.581353	-7.83426	0.0143404	0.319881	yes	Cep78	centrosomal protein 78
Zhx1	1.88357	7.59303	0.014352	0.319881	yes	Zhx1	zinc fingers and homeoboxes 1
Klf11	1.79409	7.62991	0.0143545	0.319881	yes	Klf11	Kruppel-like factor 11
Frat2	1.08424	8.03651	0.014355	0.319881	yes	Frat2	frequently rearranged in advanced T cell lymphomas 2
Glod4	1.68598	7.69393	0.0143639	0.319881	yes	Glod4	glyoxalase domain containing 4
Cadm3	0.702157	-7.77554	0.0144228	0.320548	yes	Cadm3	cell adhesion molecule 3
Sema4f	0.765278	8.20186	0.0144497	0.320548	yes	Sema4f	sema domain, immunoglobulin domain (Ig), TM domain, and short cytoplasmic domain
Syp	2.6135	7.04816	0.014461	0.320548	yes	Syp	synaptophysin
Slc5a4b	2.49583	7.13236	0.0144751	0.320548	yes	Slc5a4b	solute carrier family 5 (neutral amino acid transporters, system A), member 4b
Scrn1	0.0721032	8.52293	0.0144797	0.320548	yes	Scrn1	secernin 1
Prlr	3.21201	6.59277	0.0144814	0.320548	yes	Prlr	prolactin receptor
A330035P11Rik	0.526031	8.30004	0.0144981	0.320594	yes	A330035P11Rik	RIKEN cDNA A330035P11 gene
Zfp691	0.425324	8.32964	0.0145313	0.320689	yes	Zfp691	zinc finger protein 691
Pglyrp1	5.51119	3.09345	0.014552	0.320689	yes	Pglyrp1	peptidoglycan recognition protein 1
Zfp382	0.432119	-7.8531	0.0145593	0.320689	yes	Zfp382	zinc finger protein 382
Galk2	2.40126	7.19274	0.0145608	0.320689	yes	Galk2	galactokinase 2
Coro2b	1.00084	8.04664	0.0145886	0.320718	yes	Coro2b	coronin, actin binding protein, 2B
Zbed3	1.00158	-7.58351	0.0146046	0.320718	yes	Zbed3	zinc finger, BED type containing 3
Slc27a3	0.994563	-7.58348	0.0146349	0.320718	yes	Slc27a3	solute carrier family 27 (fatty acid transporter), member 3
Gm10157	5.19323	3.32135	0.0146366	0.320718	yes	Gm10157	predicted gene 10157
Endod1	1.80669	7.59597	0.0146614	0.320718	yes	Endod1	endonuclease domain containing 1
Tmem241	1.59887	7.71384	0.0146614	0.320718	yes	Tmem241	transmembrane protein 241
Rlbp1	-0.211162	8.60459	0.014677	0.320718	yes	Rlbp1	retinaldehyde binding protein 1
Nufip1	0.886106	8.09506	0.0147009	0.320718	yes	Nufip1	nuclear FMR1 interacting protein 1
Gm39816	0.266848	8.37608	0.0147039	0.320718	yes	Gm39816	predicted gene, 39816
Rnf145	1.22237	7.94331	0.0147082	0.320718	yes	Rnf145	ring finger protein 145
Mrpl15	2.84637	5.81781	0.0147774	0.321425	yes	Mrpl15	mitochondrial ribosomal protein L15
Ctxn3	0.531492	-7.79508	0.0147837	0.321425	yes	Ctxn3	cortexin 3
Gm46430	-0.291712	-8.16589	0.0147846	0.321425	yes	Gm46430	predicted gene, 46430
Snhg17	2.20715	7.30457	0.014808	0.321615	yes	Snhg17	small nucleolar RNA host gene 17
Hikeshi	1.74804	7.60953	0.0148483	0.322173	yes	Hikeshi	heat shock protein nuclear import factor
Peli1	1.67007	7.64812	0.0148695	0.322313	yes	Peli1	pellino 1
Pank4	1.36376	7.85606	0.0149011	0.322313	yes	Pank4	pantothenate kinase 4
Prpf38a	1.73058	7.6136	0.0149024	0.322313	yes	Prpf38a	PRP38 pre-mRNA processing factor 38 (yeast) domain containing A
Ddx19b	1.53583	7.72968	0.0149135	0.322313	yes	Ddx19b	DEAD box helicase 19b
Peg3	0.0535864	-8.01919	0.0149305	0.322364	yes	Peg3	paternally expressed 3
Pxmp2	2.84952	5.99334	0.0149514	0.322499	yes	Pxmp2	peroxisomal membrane protein 2
Zscan21	3.38348	5.27021	0.014998	0.323057	yes	Zscan21	zinc finger and SCAN domain containing 21
Gk	1.85923	7.5279	0.0150178	0.323057	yes	Gk	glycerol kinase
Gm16261	-0.18454	-8.08021	0.0150214	0.323057	yes	Gm16261	predicted gene 16261
Npm1	1.16296	7.92627	0.0150863	0.324134	yes	Npm1	nucleophosmin 1
Gpr179	-0.216271	8.55101	0.0151146	0.324424	yes	Gpr179	G protein-coupled receptor 179
Tsg101	3.4574	-4.84619	0.0151322	0.324485	yes	Tsg101	tumor susceptibility gene 101
Gm54337	0.888592	8.0471	0.0151874	0.325209	yes	Gm54337	predicted gene, 54337
Mtmr7	2.18727	7.28733	0.0152006	0.325209	yes	Mtmr7	myotubularin related protein 7
Prr14l	2.13776	7.32052	0.0152104	0.325209	yes	Prr14l	proline rich 14-like
Cage1	-0.157671	8.51015	0.0152506	0.325473	yes	Cage1	cancer antigen 1
Gm36787	0.832031	8.06532	0.0152938	0.325473	yes	Gm36787	predicted gene, 36787
Wdr31	1.57848	7.66191	0.0153148	0.325473	yes	Wdr31	WD repeat domain 31
Iqcb1	0.762231	8.0959	0.0153192	0.325473	yes	Iqcb1	IQ calmodulin-binding motif containing 1
Chmp1b	1.55808	7.67067	0.0153414	0.325473	yes	Chmp1b	charged multivesicular body protein 1B
Sptbn2	0.822951	8.06637	0.0153543	0.325473	yes	Sptbn2	spectrin beta, non-erythrocytic 2
Pcp4	3.71311	-4.60428	0.0153688	0.325473	yes	Pcp4	Purkinje cell protein 4
H2ac11	0.0759405	8.40683	0.0153714	0.325473	yes	H2ac11	H2A clustered histone 11
Lrrc71	2.27365	7.20415	0.0153896	0.325473	yes	Lrrc71	leucine rich repeat containing 71
Gm40827	1.64666	7.61378	0.0153984	0.325473	yes	Gm40827	predicted gene, 40827
Gm8283	0.874967	8.02031	0.0154308	0.325473	yes	Gm8283	predicted gene 8283
Ddx23	0.342921	-7.79538	0.0154331	0.325473	yes	Ddx23	DEAD box helicase 23
Cfap251	0.84423	8.03664	0.0154787	0.325473	yes	Cfap251	cilia and flagella associated protein 251
Slc13a5	-0.414353	-8.15887	0.0154802	0.325473	yes	Slc13a5	solute carrier family 13 (sodium-dependent citrate transporter), member 5
Gnb5	1.46015	-7.13648	0.0155254	0.325473	yes	Gnb5	guanine nucleotide binding protein (G protein), beta 5
Eif1a	1.47998	7.70065	0.0155358	0.325473	yes	Eif1a	eukaryotic translation initiation factor 1A
Sipa1l1	4.78179	3.60027	0.0155421	0.325473	yes	Sipa1l1	signal-induced proliferation-associated 1 like 1
COX2	10.4151	-1.7047	0.0155477	0.325473	yes	COX2	cytochrome c oxidase subunit II
Ccdc127	2.78155	6.01447	0.0155522	0.325473	yes	Ccdc127	coiled-coil domain containing 127
Ptger2	-0.407046	-8.14341	0.0155564	0.325473	yes	Ptger2	prostaglandin E receptor 2 (subtype EP2)
9930021J03Rik	3.61687	4.91073	0.0155571	0.325473	yes	9930021J03Rik	RIKEN cDNA 9930021J03 gene
Dars2	1.38869	7.2708	0.0155769	0.325473	yes	Dars2	aspartyl-tRNA synthetase 2 (mitochondrial)
Arhgap42	0.516663	-7.71189	0.0155843	0.325473	yes	Arhgap42	Rho GTPase activating protein 42
Gm33950	1.58644	7.64051	0.0155851	0.325473	yes	Gm33950	predicted gene, 33950
Ube2d-ps	1.65183	7.5883	0.0156068	0.325473	yes	Ube2d-ps	ubiquitin-conjugating enzyme E2D, pseudogene
Slco4a1	1.75818	7.5289	0.0156094	0.325473	yes	Slco4a1	solute carrier organic anion transporter family, member 4a1
Wdr89	5.91341	2.83892	0.0156286	0.325473	yes	Wdr89	WD repeat domain 89
Fam118a	1.68343	7.56307	0.0156814	0.325473	yes	Fam118a	family with sequence similarity 118, member A
Nos1	1.54283	7.6566	0.0156844	0.325473	yes	Nos1	nitric oxide synthase 1, neuronal
Rasl10b	0.225951	8.28065	0.0156878	0.325473	yes	Rasl10b	RAS-like, family 10, member B
Slc5a12	0.921331	7.96435	0.0157048	0.325473	yes	Slc5a12	solute carrier family 5 (sodium/glucose cotransporter), member 12
Wnt9b	-0.187791	-7.99656	0.0157089	0.325473	yes	Wnt9b	wingless-type MMTV integration site family, member 9B
Ndufs6b	8.04519	2.13493	0.0157395	0.325473	yes	Ndufs6b	NADH:ubiquinone oxidoreductase subunit S6B
Taf11	1.55453	7.63546	0.0157583	0.325473	yes	Taf11	TATA-box binding protein associated factor 11
Uspl1	1.99457	7.3816	0.0157649	0.325473	yes	Uspl1	ubiquitin specific peptidase like 1
Ahcyl1	1.51728	7.65146	0.0157797	0.325473	yes	Ahcyl1	S-adenosylhomocysteine hydrolase-like 1
Prpsap1	6.82462	2.47088	0.0157797	0.325473	yes	Prpsap1	phosphoribosyl pyrophosphate synthetase-associated protein 1
Ints9	2.76115	6.01767	0.015786	0.325473	yes	Ints9	integrator complex subunit 9
Ptch1	1.26723	7.81546	0.0158386	0.325581	yes	Ptch1	patched 1
Gm52861	0.715706	-7.60823	0.0158709	0.325581	yes	Gm52861	predicted gene, 52861
Meis3	0.920101	7.95394	0.0159249	0.325581	yes	Meis3	Meis homeobox 3
Fam241a	1.02603	7.89304	0.0159277	0.325581	yes	Fam241a	family with sequence similarity 241, member A
H2bc21	0.0602997	8.3506	0.0159447	0.325581	yes	H2bc21	H2B clustered histone 21
H6pd	1.94003	7.39894	0.0159482	0.325581	yes	H6pd	hexose-6-phosphate dehydrogenase (glucose 1-dehydrogenase)
Ell3	1.93481	7.40221	0.0159494	0.325581	yes	Ell3	elongation factor RNA polymerase II-like 3
Cttnbp2nl	1.35883	7.75168	0.0159532	0.325581	yes	Cttnbp2nl	CTTNBP2 N-terminal like
Zfp511	1.42141	7.69694	0.0159727	0.325581	yes	Zfp511	zinc finger protein 511
Il22ra2	0.538454	8.12447	0.0160164	0.325581	yes	Il22ra2	interleukin 22 receptor, alpha 2
Itgb4	7.35485	2.30614	0.0160253	0.325581	yes	Itgb4	integrin beta 4
Pkn3	1.37636	7.72147	0.0160405	0.325581	yes	Pkn3	protein kinase N3
Amigo1	0.97736	7.91249	0.0160412	0.325581	yes	Amigo1	adhesion molecule with Ig like domain 1
Pkd1l3	2.25964	7.16211	0.0160579	0.325581	yes	Pkd1l3	polycystic kidney disease 1 like 3
Tmem198b	1.62399	7.5614	0.016058	0.325581	yes	Tmem198b	transmembrane protein 198b
Cpne9	-0.474112	-8.14129	0.0160586	0.325581	yes	Cpne9	copine family member IX
Pde8b	1.14308	7.82906	0.0160829	0.325581	yes	Pde8b	phosphodiesterase 8B
C530043A13Rik	-0.226623	8.4375	0.0160845	0.325581	yes	C530043A13Rik	RIKEN cDNA C530043A13 gene
Larp4	2.75444	6.8127	0.0161479	0.325581	yes	Larp4	La ribonucleoprotein 4
Ephb3	2.10838	7.25977	0.0161559	0.325581	yes	Ephb3	Eph receptor B3
Klhl7	1.31442	7.75935	0.0162013	0.325581	yes	Klhl7	kelch-like 7
Zbtb8a	2.15309	7.22426	0.016214	0.325581	yes	Zbtb8a	zinc finger and BTB domain containing 8a
Gm42109	-0.45451	-8.09588	0.0162615	0.325581	yes	Gm42109	predicted gene, 42109
Arhgap29	0.827198	7.96568	0.016283	0.325581	yes	Arhgap29	Rho GTPase activating protein 29
Emp1	2.41736	6.29907	0.0162855	0.325581	yes	Emp1	epithelial membrane protein 1
Tmpo	1.44347	7.65249	0.0162932	0.325581	yes	Tmpo	thymopoietin
A930005H10Rik	2.211	7.173	0.0163021	0.325581	yes	A930005H10Rik	RIKEN cDNA A930005H10 gene
Rfx5	0.888198	7.91903	0.0163207	0.325581	yes	Rfx5	regulatory factor X, 5 (influences HLA class II expression)
Kcnip2	1.75926	7.48326	0.0163217	0.325581	yes	Kcnip2	Kv channel-interacting protein 2
Pdxp	1.33364	7.72451	0.0163296	0.325581	yes	Pdxp	pyridoxal (pyridoxine, vitamin B6) phosphatase
Gm52816	1.54221	7.58858	0.0163376	0.325581	yes	Gm52816	predicted gene, 52816
Cybc1	1.53238	7.59077	0.0163463	0.325581	yes	Cybc1	cytochrome b 245 chaperone 1
Gm40453	6.98379	-2.39364	0.0163468	0.325581	yes	Gm40453	predicted gene, 40453
Uevld	2.39869	7.04464	0.0163727	0.325581	yes	Uevld	UEV and lactate/malate dehyrogenase domains
Samm50	7.09935	2.36402	0.0163866	0.325581	yes	Samm50	SAMM50 sorting and assembly machinery component
Gm54336	1.78222	7.44512	0.0163953	0.325581	yes	Gm54336	predicted gene, 54336
Zfp174	0.271931	-7.71183	0.0164006	0.325581	yes	Zfp174	zinc finger protein 174
Csnk2a1-ps3	1.69459	-6.64629	0.0164042	0.325581	yes	Csnk2a1-ps3	casein kinase 2, alpha 1 polypeptide, pseudogene 3
Fstl4	0.264314	8.17823	0.0164352	0.325581	yes	Fstl4	follistatin-like 4
Gm33190	-0.264095	-7.94381	0.0164434	0.325581	yes	Gm33190	predicted gene, 33190
Gm53744	-0.464729	-8.07969	0.0164709	0.325581	yes	Gm53744	predicted gene, 53744
Filip1l	1.00524	7.84867	0.0164743	0.325581	yes	Filip1l	filamin A interacting protein 1-like
Alg1	-0.0620702	-7.86959	0.0164793	0.325581	yes	Alg1	asparagine-linked glycosylation 1 (beta-1,4-mannosyltransferase)
Uqcrq	8.38456	2.04328	0.0164934	0.325581	yes	Uqcrq	ubiquinol-cytochrome c reductase, complex III subunit VII
Gm31638	0.566305	8.06725	0.0164937	0.325581	yes	Gm31638	predicted gene, 31638
Capn15	5.45363	3.07007	0.0165024	0.325581	yes	Capn15	calpain 15
Mirc35hg	0.257091	8.17177	0.0165036	0.325581	yes	Mirc35hg	microRNA cluster 35, host gene
Popdc2	2.00561	7.29804	0.0165153	0.325581	yes	Popdc2	popeye domain containing 2
Kifc2	1.33649	7.71284	0.0165308	0.325581	yes	Kifc2	kinesin family member C2
Begain	0.655607	-7.62281	0.0165332	0.325581	yes	Begain	brain-enriched guanylate kinase-associated
Ms4a12	3.90326	4.38878	0.0165618	0.325581	yes	Ms4a12	membrane-spanning 4-domains, subfamily A, member 12
1300002E11Rik	2.6306	6.86431	0.0165822	0.325581	yes	1300002E11Rik	RIKEN cDNA 1300002E11 gene
Wfdc1	1.75097	6.87107	0.0165921	0.325581	yes	Wfdc1	WAP four-disulfide core domain 1
Gm35266	1.90385	7.36204	0.0166015	0.325581	yes	Gm35266	predicted gene, 35266
Lrfn4	1.1352	7.79053	0.0166436	0.325581	yes	Lrfn4	leucine rich repeat and fibronectin type III domain containing 4
Fam221a	-0.337226	-7.96142	0.016652	0.325581	yes	Fam221a	family with sequence similarity 221, member A
Zfand5	1.88584	7.36654	0.0166647	0.325581	yes	Zfand5	zinc finger, AN1-type domain 5
Armc8	3.48863	4.83614	0.0167005	0.325581	yes	Armc8	armadillo repeat containing 8
Il3ra	-0.00696868	-7.82924	0.0167065	0.325581	yes	Il3ra	interleukin 3 receptor, alpha chain
Kri1	1.45873	-7.14796	0.0167255	0.325581	yes	Kri1	KRI1 homolog
Tmem132a	0.837694	7.9117	0.0167275	0.325581	yes	Tmem132a	transmembrane protein 132A
Caprin1	1.62047	7.50197	0.0167296	0.325581	yes	Caprin1	cell cycle associated protein 1
Ticrr	0.8174	7.92387	0.0167352	0.325581	yes	Ticrr	TOPBP1-interacting checkpoint and replication regulator
Irgm2	1.28464	-7.18312	0.0167514	0.325581	yes	Irgm2	immunity-related GTPase family M member 2
Rbbp7	1.78395	7.41375	0.016755	0.325581	yes	Rbbp7	retinoblastoma binding protein 7, chromatin remodeling factor
Prss3b	-0.118569	8.31404	0.0168089	0.326339	yes	Prss3b	protease, serine 3B
Gm40126	1.76898	7.41181	0.0168934	0.326521	yes	Gm40126	predicted gene, 40126
Gip	6.73715	2.47824	0.0168944	0.326521	yes	Gip	gastric inhibitory polypeptide
Ppp1cb	1.69164	7.44944	0.0168951	0.326521	yes	Ppp1cb	protein phosphatase 1 catalytic subunit beta
Rnase4	2.59098	6.87491	0.0169106	0.326521	yes	Rnase4	ribonuclease, RNase A family 4
Tmem236	1.95907	7.30285	0.0169233	0.326521	yes	Tmem236	transmembrane protein 236
Ppp1r14c	1.83351	7.39188	0.016935	0.326521	yes	Ppp1r14c	protein phosphatase 1, regulatory inhibitor subunit 14C
Isg20	2.56803	6.1199	0.0169487	0.326521	yes	Isg20	interferon-stimulated protein
Gm53700	1.72041	7.43443	0.0169508	0.326521	yes	Gm53700	predicted gene, 53700
Mphosph6	0.775201	7.91518	0.0169521	0.326521	yes	Mphosph6	M phase phosphoprotein 6
Efcc1	1.31196	-7.20879	0.0170375	0.32762	yes	Efcc1	EF hand and coiled-coil domain containing 1
Fam219b	1.35344	7.64257	0.017039	0.32762	yes	Fam219b	family with sequence similarity 219, member B
Abcc3	1.4053	7.60154	0.0170967	0.328115	yes	Abcc3	ATP-binding cassette, sub-family C (CFTR/MRP), member 3
Fbxo33	0.854487	7.85859	0.0171133	0.328115	yes	Fbxo33	F-box protein 33
Chaf1b	2.95515	5.37467	0.0171287	0.328115	yes	Chaf1b	chromatin assembly factor 1, subunit B (p60)
Adck1	1.24335	7.68948	0.0171496	0.328115	yes	Adck1	aarF domain containing kinase 1
Firre	1.08055	7.74762	0.0171658	0.328115	yes	Firre	functional intergenic repeating RNA element
Igf2	1.47577	-7.09778	0.0171677	0.328115	yes	Igf2	insulin-like growth factor 2
Myo19	1.72711	7.40441	0.017194	0.328115	yes	Myo19	myosin XIX
H4c11	0.1432	8.15139	0.0172039	0.328115	yes	H4c11	H4 clustered histone 11
Tbc1d15	1.71129	7.41217	0.0172048	0.328115	yes	Tbc1d15	TBC1 domain family, member 15
Mettl8	2.17664	7.1248	0.0172142	0.328115	yes	Mettl8	methyltransferase like 8
Gm37804	2.20857	-6.10526	0.0172391	0.328306	yes	Gm37804	predicted gene, 37804
Spcs2-ps	2.14432	7.13717	0.0172883	0.328937	yes	Spcs2-ps	signal peptidase complex subunit 2, pseudogene
Sh2d6	0.636728	7.9613	0.0173022	0.328937	yes	Sh2d6	SH2 domain containing 6
Sapcd2	2.74711	5.92424	0.0173341	0.32905	yes	Sapcd2	suppressor APC domain containing 2
Ndufb9	8.47117	2.00996	0.0173442	0.32905	yes	Ndufb9	NADH:ubiquinone oxidoreductase subunit B9
Arfgap2	3.9767	4.29915	0.0173531	0.32905	yes	Arfgap2	ADP-ribosylation factor GTPase activating protein 2
Cpt1a	1.86372	7.3195	0.0173772	0.329082	yes	Cpt1a	carnitine palmitoyltransferase 1a, liver
2900060L22Rik	-0.507764	-8.02036	0.0173928	0.329082	yes	2900060L22Rik	RIKEN cDNA 2900060L22 gene
Gm36784	-0.305029	8.32651	0.0173998	0.329082	yes	Gm36784	predicted gene, 36784
Gm39008	2.07383	7.17921	0.0174544	0.329584	yes	Gm39008	predicted gene, 39008
Ralgps1	1.72026	7.38674	0.0174625	0.329584	yes	Ralgps1	Ral GEF with PH domain and SH3 binding motif 1
Sh3pxd2b	1.75478	7.36293	0.0175047	0.329584	yes	Sh3pxd2b	SH3 and PX domains 2B
Sec61a2	4.25533	3.9813	0.0175208	0.329584	yes	Sec61a2	Sec61, alpha subunit 2 (S. cerevisiae)
Gm3851	1.91448	-6.38312	0.0175817	0.329584	yes	Gm3851	predicted gene 3851
Trmt12	0.224112	-7.60402	0.0175937	0.329584	yes	Trmt12	tRNA methyltransferase 12
Isca2	1.59585	7.43994	0.017599	0.329584	yes	Isca2	iron-sulfur cluster assembly 2
Psph	1.96212	7.24378	0.0176159	0.329584	yes	Psph	phosphoserine phosphatase
Arhgap6	2.06218	7.19426	0.0176368	0.329584	yes	Arhgap6	Rho GTPase activating protein 6
Cbx2	1.37431	7.57352	0.0176396	0.329584	yes	Cbx2	chromobox 2
Iqcc	1.61369	7.42897	0.0176433	0.329584	yes	Iqcc	IQ motif containing C
Abi1	1.0684	7.70443	0.0176791	0.329584	yes	Abi1	abl interactor 1
Rgmb	1.97582	7.22668	0.0176854	0.329584	yes	Rgmb	repulsive guidance molecule family member B
Mtr	0.805568	7.82841	0.0176947	0.329584	yes	Mtr	5-methyltetrahydrofolate-homocysteine methyltransferase
Gm31869	0.395636	-7.53123	0.0177308	0.329584	yes	Gm31869	predicted gene, 31869
Rngtt	2.06007	7.16614	0.017741	0.329584	yes	Rngtt	RNA guanylyltransferase and 5'-phosphatase
Gm6750	3.29584	5.0341	0.0177428	0.329584	yes	Gm6750	predicted gene 6750
Gorab	1.1294	7.67434	0.0177506	0.329584	yes	Gorab	golgin, RAB6-interacting
Hal	0.631709	7.91595	0.0177529	0.329584	yes	Hal	histidine ammonia lyase
2310001H17Rik	0.66466	7.90366	0.0177695	0.329584	yes	2310001H17Rik	RIKEN cDNA 2310001H17 gene
Gm31566	1.59917	7.42437	0.017772	0.329584	yes	Gm31566	predicted gene, 31566
Pus1	3.15022	5.32365	0.017773	0.329584	yes	Pus1	pseudouridine synthase 1
Usp32	1.38575	7.55365	0.0177775	0.329584	yes	Usp32	ubiquitin specific peptidase 32
Phaf1	2.08595	7.13674	0.0177966	0.329584	yes	Phaf1	phagosome assembly factor 1
4833422C13Rik	0.132691	-7.63449	0.0178164	0.329584	yes	4833422C13Rik	RIKEN cDNA 4833422C13 gene
Iqce	1.71191	7.35782	0.017832	0.329584	yes	Iqce	IQ motif containing E
Snrnp27	2.66259	6.00333	0.0178622	0.329584	yes	Snrnp27	small nuclear ribonucleoprotein 27 (U4/U6.U5)
Zfx	1.46206	7.49698	0.0178662	0.329584	yes	Zfx	zinc finger protein X-linked
Ift56	0.114243	8.10712	0.0178757	0.329584	yes	Ift56	intraflagellar transport 56
Bphl	1.2835	7.61084	0.0178766	0.329584	yes	Bphl	biphenyl hydrolase-like (serine hydrolase, breast epithelial mucin-associated antigen)
Rdh1	1.86952	7.27331	0.0179093	0.329909	yes	Rdh1	retinol dehydrogenase 1 (all trans)
Ier3	3.12464	5.36857	0.0179283	0.329984	yes	Ier3	immediate early response 3
Gas7	1.62441	7.3973	0.0179632	0.330102	yes	Gas7	growth arrest specific 7
Bcl6	0.802814	7.80344	0.0179648	0.330102	yes	Bcl6	B cell leukemia/lymphoma 6
Ribc1	0.527301	7.92292	0.0179921	0.330163	yes	Ribc1	RIB43A domain with coiled-coils 1
Sestd1	1.80855	7.29562	0.0180085	0.330163	yes	Sestd1	SEC14 and spectrin domains 1
Ccser1	1.24404	7.61108	0.0180234	0.330163	yes	Ccser1	coiled-coil serine rich 1
Ikzf5	1.60409	7.39916	0.0180424	0.330163	yes	Ikzf5	IKAROS family zinc finger 5
Aldh5a1	3.12268	5.24002	0.0180434	0.330163	yes	Aldh5a1	aldhehyde dehydrogenase family 5, subfamily A1
Rab9	1.59726	7.40079	0.0180604	0.3302	yes	Rab9	RAB9, member RAS oncogene family
Spast	2.12439	7.09859	0.0180769	0.330227	yes	Spast	spastin
Klhl23	1.17582	-7.09781	0.0181221	0.330777	yes	Klhl23	kelch-like 23
Fbxo9	1.97015	-6.23966	0.018163	0.331248	yes	Fbxo9	f-box protein 9
Tpst1	2.09539	7.10056	0.0182533	0.332229	yes	Tpst1	protein-tyrosine sulfotransferase 1
Parl	1.61476	-6.56267	0.0182537	0.332229	yes	Parl	presenilin associated, rhomboid-like
Tmem30a	1.55588	7.40686	0.0182906	0.332229	yes	Tmem30a	transmembrane protein 30A
2410022M11Rik	1.90677	7.22834	0.0182907	0.332229	yes	2410022M11Rik	RIKEN cDNA 2410022M11 gene
Togaram1	-0.125986	8.15615	0.0182924	0.332229	yes	Togaram1	TOG array regulator of axonemal microtubules 1
Pole3	3.30284	5.01281	0.0183386	0.332626	yes	Pole3	polymerase (DNA directed), epsilon 3 (p17 subunit)
Lrpprc	1.28123	7.5655	0.01838	0.332626	yes	Lrpprc	leucine-rich PPR-motif containing
Gm29901	1.4013	7.49103	0.0184005	0.332626	yes	Gm29901	predicted gene, 29901
Kif5a	1.3034	7.55288	0.0184011	0.332626	yes	Kif5a	kinesin family member 5A
Rtl6	1.59818	7.3747	0.0184138	0.332626	yes	Rtl6	retrotransposon Gag like 6
Sbno1	1.92588	7.20603	0.0184186	0.332626	yes	Sbno1	strawberry notch 1
Patl1	1.28046	7.56507	0.0184212	0.332626	yes	Patl1	protein associated with topoisomerase II homolog 1 (yeast)
Piezo1	0.624863	7.85179	0.0184355	0.332626	yes	Piezo1	piezo-type mechanosensitive ion channel component 1
Tdp1	1.39591	7.48974	0.0184751	0.333067	yes	Tdp1	tyrosyl-DNA phosphodiesterase 1
Gm48952	-0.217128	-7.69071	0.01857	0.333786	yes	Gm48952	predicted gene, 48952
Fancc	1.08193	-7.13277	0.0185748	0.333786	yes	Fancc	Fanconi anemia, complementation group C
Ankrd23	1.7619	-6.47537	0.0185802	0.333786	yes	Ankrd23	ankyrin repeat domain 23
Galnt11	0.720916	7.79169	0.0185806	0.333786	yes	Galnt11	polypeptide N-acetylgalactosaminyltransferase 11
Aatk	1.00548	-7.20516	0.018591	0.333786	yes	Aatk	apoptosis-associated tyrosine kinase
Prdm4	1.80223	7.24915	0.0186181	0.334	yes	Prdm4	PR domain containing 4
Fam3a	1.83489	7.22729	0.0186546	0.334382	yes	Fam3a	FAM3 metabolism regulating signaling molecule A
0610040J01Rik	1.83191	7.22606	0.0187259	0.335129	yes	0610040J01Rik	RIKEN cDNA 0610040J01 gene
Fam8a1	2.06538	7.0835	0.0187356	0.335129	yes	Fam8a1	family with sequence similarity 8, member A1
Rprml	1.52149	7.38775	0.0187421	0.335129	yes	Rprml	reprimo-like
Mak16	0.169002	-7.51045	0.0188234	0.336156	yes	Mak16	MAK16 homolog
Gm36210	1.38964	6.98029	0.0188301	0.336156	yes	Gm36210	predicted gene, 36210
Cldn2	1.98023	7.12914	0.0188911	0.336971	yes	Cldn2	claudin 2
Nt5e	2.8682	-5.26445	0.0189951	0.338551	yes	Nt5e	5' nucleotidase, ecto
Gm46830	0.743788	-7.27703	0.0190227	0.338767	yes	Gm46830	predicted gene, 46830
Krt10	1.31707	7.49097	0.0190691	0.339043	yes	Krt10	keratin 10
Draxin	1.04108	-7.12905	0.0190894	0.339043	yes	Draxin	dorsal inhibitory axon guidance protein
Rps26	3.78764	4.3757	0.0191009	0.339043	yes	Rps26	ribosomal protein S26
Hmgn1	2.19732	6.9712	0.0191111	0.339043	yes	Hmgn1	high mobility group nucleosomal binding domain 1
Tmem106b	1.00433	7.60315	0.0191154	0.339043	yes	Tmem106b	transmembrane protein 106B
Scnn1a	1.24778	7.50925	0.0191682	0.339705	yes	Scnn1a	sodium channel, nonvoltage-gated 1 alpha
Gm14279	0.559941	-7.33206	0.0192032	0.340051	yes	Gm14279	predicted gene 14279
Mvp	6.92632	2.35346	0.0192337	0.340103	yes	Mvp	major vault protein
Atp10a	0.125615	7.96449	0.0192454	0.340103	yes	Atp10a	ATPase, class V, type 10A
Tln2	1.69466	7.25406	0.019256	0.340103	yes	Tln2	talin 2
Particl	2.00507	7.08646	0.0192735	0.340103	yes	Particl	promoter of Mat2a antisense radiation induced circulating long non-coding RNA
Gm53815	0.737408	7.72702	0.01933	0.340103	yes	Gm53815	predicted gene, 53815
G6pc3	4.87283	3.37665	0.0193424	0.340103	yes	G6pc3	glucose 6 phosphatase, catalytic, 3
Itgb1bp1	1.44328	-6.72524	0.0193511	0.340103	yes	Itgb1bp1	integrin beta 1 binding protein 1
Per2	1.07848	7.55067	0.019371	0.340103	yes	Per2	period circadian clock 2
Zfp300	1.75272	-6.47269	0.0193806	0.340103	yes	Zfp300	zinc finger protein 300
Lamb3	3.69258	4.45658	0.0194011	0.340103	yes	Lamb3	laminin, beta 3
Eif3f	6.08062	-2.6585	0.0194018	0.340103	yes	Eif3f	eukaryotic translation initiation factor 3, subunit F
Spcs3	2.41418	-5.71051	0.0194072	0.340103	yes	Spcs3	signal peptidase complex subunit 3 homolog (S. cerevisiae)
Maml1	1.58972	7.29844	0.0194095	0.340103	yes	Maml1	mastermind like transcriptional coactivator 1
Vars2	1.40988	7.39839	0.0194422	0.340103	yes	Vars2	valyl-tRNA synthetase 2, mitochondrial
Smc6	4.51365	-3.60137	0.0194422	0.340103	yes	Smc6	structural maintenance of chromosomes 6
Tox4	2.13677	6.98267	0.0194613	0.340103	yes	Tox4	TOX high mobility group box family member 4
Plekhm3	2.84783	5.72978	0.0194694	0.340103	yes	Plekhm3	pleckstrin homology domain containing, family M, member 3
Gm47324	1.07652	-7.05835	0.0194997	0.340148	yes	Gm47324	predicted gene, 47324
Prss30	4.4938	3.68577	0.019503	0.340148	yes	Prss30	protease, serine 30
Ube2b	2.88101	5.6638	0.0195325	0.340338	yes	Ube2b	ubiquitin-conjugating enzyme E2B
Megf11	0.845874	-7.20828	0.0195449	0.340338	yes	Megf11	multiple EGF-like-domains 11
Doc2g	1.51028	7.32724	0.01958	0.34068	yes	Doc2g	double C2, gamma
1700086P04Rik	-0.142567	8.03064	0.0196253	0.341197	yes	1700086P04Rik	RIKEN cDNA 1700086P04 gene
Zfp608	2.48288	6.04969	0.0196563	0.341246	yes	Zfp608	zinc finger protein 608
Serpinb1a	1.98956	7.06762	0.0196594	0.341246	yes	Serpinb1a	serine (or cysteine) peptidase inhibitor, clade B, member 1a
Zfp747	2.56563	5.94248	0.0196921	0.341246	yes	Zfp747	zinc finger protein 747
Arhgap5	1.69926	7.21679	0.0197119	0.341246	yes	Arhgap5	Rho GTPase activating protein 5
Sorbs3	1.26783	-6.99846	0.0197154	0.341246	yes	Sorbs3	sorbin and SH3 domain containing 3
A330001L22Rik	1.15573	7.5051	0.0197308	0.341246	yes	A330001L22Rik	RIKEN cDNA A330001L22 gene
Ttpal	0.192331	-7.41665	0.0197486	0.341246	yes	Ttpal	tocopherol (alpha) transfer protein-like
Ccndbp1	1.25742	7.46027	0.0197524	0.341246	yes	Ccndbp1	cyclin D-type binding-protein 1
Uchl5	1.72278	7.19873	0.0198003	0.341805	yes	Uchl5	ubiquitin carboxyl-terminal esterase L5
Gm42808	1.22756	7.46002	0.0198597	0.34256	yes	Gm42808	predicted gene 42808
Cep57l1	0.929815	7.56824	0.0199172	0.34279	yes	Cep57l1	centrosomal protein 57-like 1
Pla2g5	1.48698	7.31524	0.0199175	0.34279	yes	Pla2g5	phospholipase A2, group V
Gm6581	10.0109	1.69936	0.019939	0.34279	yes	Gm6581	predicted gene 6581
Gm47655	1.87152	7.11349	0.0199535	0.34279	yes	Gm47655	predicted gene, 47655
Gm34150	-0.544123	-7.77683	0.019978	0.34279	yes	Gm34150	predicted gene, 34150
Atp5d	9.06489	1.85554	0.019991	0.34279	yes	Atp5d	ATP synthase, H+ transporting, mitochondrial F1 complex, delta subunit
Sec24b	2.36108	6.8062	0.0199973	0.34279	yes	Sec24b	Sec24 related gene family, member B (S. cerevisiae)
Lsm11	3.14097	5.23389	0.0199979	0.34279	yes	Lsm11	U7 snRNP-specific Sm-like protein LSM11
Borcs7	3.02859	5.23657	0.0201037	0.344334	yes	Borcs7	BLOC-1 related complex subunit 7
Rita1	1.23595	7.43752	0.0201491	0.344704	yes	Rita1	RBPJ interacting and tubulin associated 1
Gm35795	-0.458222	8.14438	0.0201703	0.344704	yes	Gm35795	predicted gene, 35795
Kcnn1	-0.351218	8.06981	0.0201723	0.344704	yes	Kcnn1	potassium intermediate/small conductance calcium-activated channel, subfamily N, member 1
Dhrs13	2.19602	6.89062	0.0202071	0.345019	yes	Dhrs13	dehydrogenase/reductase (SDR family) member 13
4933440N22Rik	0.244824	7.80687	0.0202222	0.345019	yes	4933440N22Rik	RIKEN cDNA 4933440N22 gene
Snx5	0.961238	7.5242	0.0202577	0.34505	yes	Snx5	sorting nexin 5
Rsph1	-0.143559	7.96781	0.0202841	0.34505	yes	Rsph1	radial spoke head 1 homolog (Chlamydomonas)
Fbxo36	1.52695	7.26259	0.0202994	0.34505	yes	Fbxo36	F-box protein 36
Gng4	-0.378765	-7.60253	0.0203192	0.34505	yes	Gng4	guanine nucleotide binding protein (G protein), gamma 4
Nrep	0.00570939	-7.47347	0.0203224	0.34505	yes	Nrep	neuronal regeneration related protein
Slc12a4	2.63405	-5.48854	0.0203433	0.34505	yes	Slc12a4	solute carrier family 12, member 4
Thap1	2.01948	6.99821	0.0203515	0.34505	yes	Thap1	THAP domain containing, apoptosis associated protein 1
Map2k1	2.7775	6.511	0.0203599	0.34505	yes	Map2k1	mitogen-activated protein kinase kinase 1
Slc25a26	1.77614	7.13143	0.0203655	0.34505	yes	Slc25a26	solute carrier family 25 (mitochondrial carrier, phosphate carrier), member 26
Six5	2.43637	6.04444	0.0204015	0.345176	yes	Six5	sine oculis-related homeobox 5
I830077J02Rik	0.298856	-7.30369	0.0204191	0.345176	yes	I830077J02Rik	RIKEN cDNA I830077J02 gene
1810044D09Rik	1.88425	7.0805	0.0204201	0.345176	yes	1810044D09Rik	RIKEN cDNA 1810044D09 gene
Ercc6	1.96861	7.02607	0.020477	0.345209	yes	Ercc6	excision repair cross-complementing rodent repair deficiency, complementation group 6
Gm41005	1.6035	7.21042	0.0204806	0.345209	yes	Gm41005	predicted gene, 41005
Hsf5	-0.261053	-7.53323	0.0204881	0.345209	yes	Hsf5	heat shock transcription factor family member 5
Igha	11.0499	1.54376	0.0205075	0.345209	yes	Igha	immunoglobulin heavy constant alpha
Pex11b	1.29007	7.38672	0.0205508	0.345209	yes	Pex11b	peroxisomal biogenesis factor 11 beta
Dhx16	3.29107	4.95216	0.020555	0.345209	yes	Dhx16	DEAH (Asp-Glu-Ala-His) box polypeptide 16
Lgals7	-0.627377	-7.79794	0.0205942	0.345209	yes	Lgals7	lectin, galactose binding, soluble 7
Pcbd1	5.2313	3.1027	0.0206049	0.345209	yes	Pcbd1	pterin 4 alpha carbinolamine dehydratase/dimerization cofactor of hepatocyte nuclear factor 1 alpha (TCF1) 1
Prss23	1.96006	7.02042	0.0206284	0.345209	yes	Prss23	protease, serine 23
Spryd7	1.57175	7.21455	0.0206321	0.345209	yes	Spryd7	SPRY domain containing 7
Bnip3l-ps	0.731795	7.608	0.0206451	0.345209	yes	Bnip3l-ps	BCL2/adenovirus E1B interacting protein 3-like, pseudogene
Ptprn	1.14471	7.42094	0.0206866	0.345209	yes	Ptprn	protein tyrosine phosphatase, receptor type, N
Il18	1.03069	7.46133	0.0207187	0.345209	yes	Il18	interleukin 18
Smad9	0.756874	7.59073	0.0207745	0.345209	yes	Smad9	SMAD family member 9
Vstm5	1.30781	7.35928	0.0207812	0.345209	yes	Vstm5	V-set and transmembrane domain containing 5
Yy2	1.31747	-6.89158	0.0207839	0.345209	yes	Yy2	Yy2 transcription factor
Tmem30b	1.11177	7.42244	0.0208127	0.345209	yes	Tmem30b	transmembrane protein 30B
Cers6	1.39766	7.2979	0.0208372	0.345209	yes	Cers6	ceramide synthase 6
Stimate	4.2457	3.83384	0.0208511	0.345209	yes	Stimate	STIM activating enhancer
Slc10a5	1.35225	7.32785	0.0208638	0.345209	yes	Slc10a5	solute carrier family 10 (sodium/bile acid cotransporter family), member 5
Gm42151	1.60825	7.17813	0.020864	0.345209	yes	Gm42151	predicted gene, 42151
Ehhadh	1.70079	7.13017	0.020867	0.345209	yes	Ehhadh	enoyl-Coenzyme A, hydratase/3-hydroxyacyl Coenzyme A dehydrogenase
Memo1	3.70646	4.46348	0.0208719	0.345209	yes	Memo1	mediator of cell motility 1
2810407A14Rik	1.17478	7.41045	0.020873	0.345209	yes	2810407A14Rik	RIKEN cDNA 2810407A14 gene
Herc1	2.857	5.61311	0.0208762	0.345209	yes	Herc1	HECT and RLD domain containing E3 ubiquitin protein ligase family member 1
H2ac8	0.603789	7.63639	0.0208952	0.345209	yes	H2ac8	H2A clustered histone 8
Ppp4r3a	1.43104	7.27234	0.0209054	0.345209	yes	Ppp4r3a	protein phosphatase 4 regulatory subunit 3A
Map3k13	4.59641	3.52763	0.0209489	0.345209	yes	Map3k13	mitogen-activated protein kinase kinase kinase 13
Slc37a3	2.07207	6.92055	0.0209547	0.345209	yes	Slc37a3	solute carrier family 37 (glycerol-3-phosphate transporter), member 3
Gls2	-0.39046	8.01861	0.0209584	0.345209	yes	Gls2	glutaminase 2 (liver, mitochondrial)
Iffo2	2.15899	6.86846	0.0209679	0.345209	yes	Iffo2	intermediate filament family orphan 2
Tbc1d4	1.19991	7.38358	0.0209898	0.345209	yes	Tbc1d4	TBC1 domain family, member 4
Pnisr	8.6467	-1.91284	0.021012	0.345209	yes	Pnisr	PNN interacting serine/arginine-rich
Fgl2	0.0958043	7.81954	0.0210607	0.345209	yes	Fgl2	fibrinogen-like protein 2
Ppp1r3d	-0.584033	-7.71158	0.0210863	0.345209	yes	Ppp1r3d	protein phosphatase 1, regulatory subunit 3D
Dcaf6	1.23084	-6.75051	0.0210962	0.345209	yes	Dcaf6	DDB1 and CUL4 associated factor 6
Lrrc4b	-0.567823	-7.69806	0.021097	0.345209	yes	Lrrc4b	leucine rich repeat containing 4B
Pxylp1	0.809321	7.52644	0.021123	0.345209	yes	Pxylp1	2-phosphoxylose phosphatase 1
Stard13	1.94476	6.99971	0.021124	0.345209	yes	Stard13	StAR-related lipid transfer (START) domain containing 13
Gm16702	1.52017	7.2097	0.0211271	0.345209	yes	Gm16702	predicted gene, 16702
Nhej1	2.03602	6.29233	0.0211297	0.345209	yes	Nhej1	non-homologous end joining factor 1
Ndel1	3.9759	4.05492	0.02113	0.345209	yes	Ndel1	nudE neurodevelopment protein 1 like 1
Dtx4	2.11931	6.88519	0.0211529	0.345209	yes	Dtx4	deltex 4, E3 ubiquitin ligase
Gm38914	-0.0324502	7.86458	0.0211545	0.345209	yes	Gm38914	predicted gene, 38914
Gm6498	-0.54088	8.12466	0.0211583	0.345209	yes	Gm6498	predicted gene 6498
5430405H02Rik	0.953901	7.45859	0.0211929	0.345209	yes	5430405H02Rik	RIKEN cDNA 5430405H02 gene
Stra6	1.23753	7.35591	0.0212042	0.345209	yes	Stra6	stimulated by retinoic acid gene 6
Wdr93	0.259346	7.72526	0.0212095	0.345209	yes	Wdr93	WD repeat domain 93
Ddx11	-0.232119	7.909	0.0212504	0.345209	yes	Ddx11	DEAD/H box helicase 11
Btbd1	1.52833	7.19401	0.0212537	0.345209	yes	Btbd1	BTB (POZ) domain containing 1
Minpp1	1.52487	7.20392	0.0212543	0.345209	yes	Minpp1	multiple inositol polyphosphate histidine phosphatase 1
9130221H12Rik	2.02619	6.932	0.0212597	0.345209	yes	9130221H12Rik	RIKEN cDNA 9130221H12 gene
Grin1	0.12	7.78402	0.021265	0.345209	yes	Grin1	glutamate receptor, ionotropic, NMDA1 (zeta 1)
Samd12	-0.387229	7.98036	0.0212974	0.345209	yes	Samd12	sterile alpha motif domain containing 12
Usp22	1.81018	7.04826	0.0213284	0.345209	yes	Usp22	ubiquitin specific peptidase 22
Lyset	0.741741	7.54415	0.0213292	0.345209	yes	Lyset	lysosomal enzyme trafficking factor
Tigar	2.99707	-4.99347	0.0213294	0.345209	yes	Tigar	Trp53 induced glycolysis regulatory phosphatase
Gm54213	1.0427	7.41056	0.0213397	0.345209	yes	Gm54213	predicted gene, 54213
Ddx19a	1.21797	7.34415	0.0213671	0.345209	yes	Ddx19a	DEAD box helicase 19a
St8sia4	1.25465	-6.69662	0.0213727	0.345209	yes	St8sia4	ST8 alpha-N-acetyl-neuraminide alpha-2,8-sialyltransferase 4
Mreg	0.997918	7.4176	0.021431	0.345209	yes	Mreg	melanoregulin
Dpf1	0.21969	7.72095	0.0214616	0.345209	yes	Dpf1	double PHD fingers 1
Gm53973	0.0707076	-7.33231	0.0214717	0.345209	yes	Gm53973	predicted gene, 53973
Elovl5	0.408451	7.63711	0.0214803	0.345209	yes	Elovl5	ELOVL family member 5, elongation of long chain fatty acids (yeast)
Pcnp	0.901541	7.45485	0.0214836	0.345209	yes	Pcnp	PEST proteolytic signal containing nuclear protein
Nkain1	1.59018	7.14391	0.0214923	0.345209	yes	Nkain1	Na+/K+ transporting ATPase interacting 1
Arrdc4	1.18613	7.34403	0.0215038	0.345209	yes	Arrdc4	arrestin domain containing 4
D11Wsu47e	1.00303	7.41193	0.021512	0.345209	yes	D11Wsu47e	DNA segment, Chr 11, Wayne State University 47, expressed
Gm46418	-0.66776	-7.71073	0.0215504	0.345209	yes	Gm46418	predicted gene, 46418
Gm3227	-0.365388	7.95076	0.0215535	0.345209	yes	Gm3227	predicted gene 3227
Adprs	0.919417	7.44114	0.0215662	0.345209	yes	Adprs	ADP-ribosylserine hydrolase
Terf1	0.438535	7.625	0.0215749	0.345209	yes	Terf1	telomeric repeat binding factor 1
Slc4a3	1.68973	7.1076	0.0215816	0.345209	yes	Slc4a3	solute carrier family 4 (anion exchanger), member 3
Ube2g1	0.220435	7.69873	0.0215854	0.345209	yes	Ube2g1	ubiquitin-conjugating enzyme E2G 1
Ctsl	1.9237	6.97451	0.021606	0.345287	yes	Ctsl	cathepsin L
Gm13203	1.40823	6.75258	0.0216418	0.345347	yes	Gm13203	predicted gene 13203
Dtx3	1.35292	7.26961	0.0216476	0.345347	yes	Dtx3	deltex 3, E3 ubiquitin ligase
Camk2g	1.76194	7.04807	0.0216748	0.345347	yes	Camk2g	calcium/calmodulin-dependent protein kinase II gamma
Pld1	2.03225	6.89958	0.0216786	0.345347	yes	Pld1	phospholipase D1
Mtf2	1.01637	7.39071	0.0216884	0.345347	yes	Mtf2	metal response element binding transcription factor 2
Amacr	1.96777	6.94175	0.0217219	0.345589	yes	Amacr	alpha-methylacyl-CoA racemase
C1qtnf4	0.000364285	7.80637	0.0217351	0.345589	yes	C1qtnf4	C1q and tumor necrosis factor related protein 4
Saraf	4.25056	3.81463	0.0218208	0.346434	yes	Saraf	store-operated calcium entry-associated regulatory factor
Cct4	0.815919	7.46697	0.0218408	0.346434	yes	Cct4	chaperonin containing Tcp1, subunit 4 (delta)
Gm52280	-0.465775	-7.53388	0.0218463	0.346434	yes	Gm52280	predicted gene, 52280
Dnaaf2	1.58153	-6.52897	0.0218513	0.346434	yes	Dnaaf2	dynein, axonemal assembly factor 2
Limch1	0.928085	-6.96943	0.0219249	0.346597	yes	Limch1	LIM and calponin homology domains 1
Mecomos	0.372985	7.62465	0.0219306	0.346597	yes	Mecomos	MDS1 and EVI1 complex locus, opposite strand
Lrrc75aos1	1.60718	7.11115	0.0219316	0.346597	yes	Lrrc75aos1	leucine rich repeat containing 75A, opposite strand 1
Fam222a	-0.164767	-7.35694	0.021932	0.346597	yes	Fam222a	family with sequence similarity 222, member A
Ikbkb	0.430708	7.59206	0.0219556	0.346597	yes	Ikbkb	inhibitor of kappaB kinase beta
Gm39518	-0.396977	-7.4746	0.0219613	0.346597	yes	Gm39518	predicted gene, 39518
Gm5928	0.54166	-7.1801	0.0219721	0.346597	yes	Gm5928	predicted gene 5928
Pycr1	1.74657	-6.21462	0.022065	0.347643	yes	Pycr1	pyrroline-5-carboxylate reductase 1
Sox8	-0.697986	-7.67779	0.0220701	0.347643	yes	Sox8	SRY (sex determining region Y)-box 8
Rnf38	1.51281	7.14011	0.0221226	0.347926	yes	Rnf38	ring finger protein 38
Kti12	0.941225	7.39114	0.0221248	0.347926	yes	Kti12	KTI12 homolog, chromatin associated
Prss27	0.766676	7.46827	0.0221356	0.347926	yes	Prss27	protease, serine 27
Gm5867	1.62374	7.07548	0.022194	0.348169	yes	Gm5867	predicted gene 5867
Eno4	0.442313	7.56867	0.0221941	0.348169	yes	Eno4	enolase 4
Ssr3	2.28381	6.70926	0.0222304	0.348169	yes	Ssr3	signal sequence receptor, gamma
Pde4dip	1.40971	7.18968	0.0222498	0.348169	yes	Pde4dip	phosphodiesterase 4D interacting protein (myomegalin)
Slfn4	0.688482	7.51571	0.0222639	0.348169	yes	Slfn4	schlafen 4
Gm53990	0.680564	7.50638	0.0222783	0.348169	yes	Gm53990	predicted gene, 53990
Ppp3cb	0.838998	7.42238	0.0222856	0.348169	yes	Ppp3cb	protein phosphatase 3, catalytic subunit, beta isoform
Gm41598	1.38103	7.20268	0.0222883	0.348169	yes	Gm41598	predicted gene, 41598
Lrrn4	1.39284	-6.73563	0.0222937	0.348169	yes	Lrrn4	leucine rich repeat neuronal 4
Acot4	0.783209	7.44669	0.0223101	0.348177	yes	Acot4	acyl-CoA thioesterase 4
Dnajc28	0.750869	7.46304	0.0223481	0.348418	yes	Dnajc28	DnaJ heat shock protein family (Hsp40) member C28
9430083A17Rik	1.21276	7.27647	0.0223572	0.348418	yes	9430083A17Rik	RIKEN cDNA 9430083A17 gene
Pik3r5	1.09829	7.31071	0.0224029	0.348775	yes	Pik3r5	phosphoinositide-3-kinase regulatory subunit 5
Odr4	3.19079	5.28282	0.022412	0.348775	yes	Odr4	odr4 GPCR localization factor homolog
Tbce	-0.338392	-7.38306	0.0224793	0.349575	yes	Tbce	tubulin-specific chaperone E
Noc4l	2.04496	6.84561	0.0225078	0.34977	yes	Noc4l	NOC4 like
Gm32340	1.16686	7.27812	0.0225248	0.349788	yes	Gm32340	predicted gene, 32340
Gm30091	0.631537	7.511	0.0225987	0.350687	yes	Gm30091	predicted gene, 30091
Wfdc2	-0.550162	7.99218	0.0227169	0.352212	yes	Wfdc2	WAP four-disulfide core domain 2
1700001C19Rik	-0.203687	7.76168	0.0227445	0.352212	yes	1700001C19Rik	RIKEN cDNA 1700001C19 gene
Cul1	1.03748	7.30518	0.0227483	0.352212	yes	Cul1	cullin 1
Sgk3	0.344462	7.55655	0.0227638	0.352212	yes	Sgk3	serum/glucocorticoid regulated kinase 3
Tyw1	3.74523	4.22731	0.0228096	0.352212	yes	Tyw1	tRNA-yW synthesizing protein 1 homolog (S. cerevisiae)
Tcn2	7.83118	2.10802	0.0228514	0.352212	yes	Tcn2	transcobalamin 2
Gm42333	1.77666	6.98419	0.0228559	0.352212	yes	Gm42333	predicted gene, 42333
Gm3716	-0.153951	-7.27413	0.0228775	0.352212	yes	Gm3716	predicted gene 3716
Jmjd4	0.499269	7.49814	0.0229189	0.352212	yes	Jmjd4	jumonji domain containing 4
Marchf9	1.52597	7.0784	0.0229189	0.352212	yes	Marchf9	membrane associated ring-CH-type finger 9
Gm8493	0.487923	7.507	0.0229314	0.352212	yes	Gm8493	predicted gene 8493
Pde6d	3.14307	4.9826	0.0229616	0.352212	yes	Pde6d	phosphodiesterase 6D, cGMP-specific, rod, delta
1700034H15Rik	-0.533917	-7.4842	0.0229662	0.352212	yes	1700034H15Rik	RIKEN cDNA 1700034H15 gene
Setd5	4.8818	-3.25734	0.0229964	0.352212	yes	Setd5	SET domain containing 5
Trmt9b	1.11262	7.25891	0.0230057	0.352212	yes	Trmt9b	tRNA methyltransferase 9B
Mapk8ip1	1.55657	6.53241	0.0230061	0.352212	yes	Mapk8ip1	mitogen-activated protein kinase 8 interacting protein 1
Fermt3	0.70487	7.43675	0.0230262	0.352212	yes	Fermt3	fermitin family member 3
Ext1	6.24622	2.52378	0.0230297	0.352212	yes	Ext1	exostosin glycosyltransferase 1
Cd53	0.217819	7.58241	0.0230448	0.352212	yes	Cd53	CD53 antigen
Arvcf	2.61024	6.46955	0.0230568	0.352212	yes	Arvcf	armadillo repeat gene deleted in velocardiofacial syndrome
Setdb1	1.26153	7.21114	0.0230672	0.352212	yes	Setdb1	SET domain, bifurcated 1
Slc25a17	1.18281	7.23416	0.023085	0.352212	yes	Slc25a17	solute carrier family 25 (mitochondrial carrier, peroxisomal membrane protein), member 17
Iqcd	0.00301038	7.69131	0.0230854	0.352212	yes	Iqcd	IQ motif containing D
Gm35755	-0.583053	7.99231	0.023104	0.352212	yes	Gm35755	predicted gene, 35755
Arl5c	1.74205	6.96637	0.0231152	0.352212	yes	Arl5c	ADP-ribosylation factor-like 5C
Gm46660	-0.747513	-7.60159	0.0231246	0.352212	yes	Gm46660	predicted gene, 46660
Hnf1b	2.99939	5.04298	0.0231301	0.352212	yes	Hnf1b	HNF1 homeobox B
Ebag9	1.63068	7.00836	0.0231569	0.352298	yes	Ebag9	estrogen receptor-binding fragment-associated gene 9
Rps25	3.7087	-4.18042	0.0231678	0.352298	yes	Rps25	ribosomal protein S25
Gm11657	4.57257	3.46755	0.0232441	0.353214	yes	Gm11657	predicted gene 11657
Eya2	-0.153217	7.71254	0.0232639	0.35327	yes	Eya2	EYA transcriptional coactivator and phosphatase 2
Gm46350	1.24355	7.20188	0.023284	0.353331	yes	Gm46350	predicted gene, 46350
Emilin3	0.384837	-7.04524	0.0233188	0.353537	yes	Emilin3	elastin microfibril interfacer 3
Gm7106	4.75579	3.33056	0.0233385	0.353537	yes	Gm7106	predicted gene 7106
Isoc1	1.3209	7.16406	0.0233459	0.353537	yes	Isoc1	isochorismatase domain containing 1
Ptges3	0.907426	7.31361	0.0233794	0.353687	yes	Ptges3	prostaglandin E synthase 3
Hars	2.19619	6.02044	0.0233882	0.353687	yes	Hars	histidyl-tRNA synthetase
Erlin1	0.576712	7.44406	0.0234192	0.353687	yes	Erlin1	ER lipid raft associated 1
Mtmr2	0.154992	7.58228	0.0234251	0.353687	yes	Mtmr2	myotubularin related protein 2
Ugt2b34	1.87143	6.87936	0.0234441	0.353687	yes	Ugt2b34	UDP glucuronosyltransferase 2 family, polypeptide B34
Gm24924	-0.62708	-7.53445	0.0234556	0.353687	yes	Gm24924	predicted gene, 24924
Gm46878	0.149976	-7.13454	0.0234786	0.353687	yes	Gm46878	predicted gene, 46878
E330033B04Rik	2.45345	6.54222	0.0234985	0.353687	yes	E330033B04Rik	RIKEN cDNA E330033B04 gene
F2rl2	0.504584	7.46078	0.023541	0.353687	yes	F2rl2	coagulation factor II (thrombin) receptor-like 2
Sil1	4.57608	3.48192	0.0235462	0.353687	yes	Sil1	SIL1 nucleotide exchange factor
Wac	0.877796	7.30945	0.0235469	0.353687	yes	Wac	WW domain containing adaptor with coiled-coil
Etl4	3.21153	4.74177	0.0235491	0.353687	yes	Etl4	enhancer trap locus 4
Apaf1	5.62627	-2.7604	0.0235652	0.353687	yes	Apaf1	apoptotic peptidase activating factor 1
Rfesd	0.840722	7.32685	0.0235872	0.353708	yes	Rfesd	Rieske (Fe-S) domain containing
Cacna1b	0.928816	-6.93615	0.0236153	0.353708	yes	Cacna1b	calcium channel, voltage-dependent, N type, alpha 1B subunit
Gm14137	-0.676942	-7.53456	0.0236423	0.353708	yes	Gm14137	predicted gene 14137
Gm21586	1.14934	7.20857	0.0236444	0.353708	yes	Gm21586	predicted gene, 21586
Gm53983	1.34902	7.12951	0.0236471	0.353708	yes	Gm53983	predicted gene, 53983
Adprhl1	-0.223235	7.7003	0.0237238	0.35412	yes	Adprhl1	ADP-ribosylhydrolase like 1
Kynu	-0.761759	-7.55554	0.0237318	0.35412	yes	Kynu	kynureninase
Vsig2	-0.382788	7.77502	0.0237389	0.35412	yes	Vsig2	V-set and immunoglobulin domain containing 2
Snora73b	1.0227	7.25283	0.0237406	0.35412	yes	Snora73b	small nucleolar RNA, H/ACA box 73b
Rfc3	1.56084	7.01033	0.0237815	0.35412	yes	Rfc3	replication factor C (activator 1) 3
Gm46386	1.11616	7.20509	0.0238182	0.35412	yes	Gm46386	predicted gene, 46386
Plekhh1	1.64394	6.96198	0.023833	0.35412	yes	Plekhh1	pleckstrin homology domain containing, family H (with MyTH4 domain) member 1
Exo5	1.47079	7.04863	0.0238536	0.35412	yes	Exo5	exonuclease 5
Shprh	0.458385	7.44161	0.0238549	0.35412	yes	Shprh	SNF2 histone linker PHD RING helicase
Tbc1d7	0.592828	7.4083	0.023865	0.35412	yes	Tbc1d7	TBC1 domain family, member 7
Ier5	3.37508	-4.5144	0.0238683	0.35412	yes	Ier5	immediate early response 5
Nme7	0.572123	7.41165	0.0238798	0.35412	yes	Nme7	NME/NM23 family member 7
Slc3a2	7.01438	2.2324	0.0238843	0.35412	yes	Slc3a2	solute carrier family 3 (activators of dibasic and neutral amino acid transport), member 2
Ptp4a1	0.929977	7.25991	0.0239527	0.354197	yes	Ptp4a1	protein tyrosine phosphatase 4a1
Entrep1	1.67301	6.93858	0.0239809	0.354197	yes	Entrep1	endosomal transmembrane epsin interactor 1
Lmbrd1	4.76365	3.36601	0.0239881	0.354197	yes	Lmbrd1	LMBR1 domain containing 1
Lenep	1.95502	6.81235	0.024002	0.354197	yes	Lenep	lens epithelial protein
H4c8	2.87579	5.11658	0.0240133	0.354197	yes	H4c8	H4 clustered histone 8
Adss	1.61529	6.96126	0.024025	0.354197	yes	Adss	adenylosuccinate synthetase, non muscle
Srd5a1	1.82331	6.86496	0.0240302	0.354197	yes	Srd5a1	steroid 5 alpha-reductase 1
Gm36375	0.578762	7.40371	0.0240392	0.354197	yes	Gm36375	predicted gene, 36375
Gm9530	1.92048	6.82574	0.0240436	0.354197	yes	Gm9530	predicted gene 9530
Aig1	2.39175	5.83261	0.0240508	0.354197	yes	Aig1	androgen-induced 1
Stard5	2.17081	-5.63262	0.0240945	0.354395	yes	Stard5	StAR-related lipid transfer (START) domain containing 5
Vcl	1.13757	7.17625	0.0240965	0.354395	yes	Vcl	vinculin
Slc26a3	1.49224	7.01561	0.02414	0.354797	yes	Slc26a3	solute carrier family 26, member 3
Lrrc3	1.73679	6.8997	0.024183	0.35483	yes	Lrrc3	leucine rich repeat containing 3
Gas8	1.48005	7.02189	0.0241993	0.35483	yes	Gas8	growth arrest specific 8
Tmem41b	1.42325	7.04809	0.0242016	0.35483	yes	Tmem41b	transmembrane protein 41B
Esco1	1.13856	7.18202	0.0242191	0.35483	yes	Esco1	establishment of sister chromatid cohesion N-acetyltransferase 1
Aars2	1.18084	6.71984	0.0242231	0.35483	yes	Aars2	alanyl-tRNA synthetase 2, mitochondrial
Soga1	2.31313	6.57913	0.024265	0.355208	yes	Soga1	suppressor of glucose, autophagy associated 1
Mettl23	0.910249	7.24233	0.0243534	0.356103	yes	Mettl23	methyltransferase like 23
Peds1	2.95039	6.19479	0.0243587	0.356103	yes	Peds1	plasmanylethanolamine desaturase 1
Zfp655	0.460952	7.39813	0.0243839	0.356199	yes	Zfp655	zinc finger protein 655
Gm54004	-0.553665	-7.38235	0.0243976	0.356199	yes	Gm54004	predicted gene, 54004
Gm53729	-0.709154	-7.47563	0.0244921	0.357173	yes	Gm53729	predicted gene, 53729
Cpeb3	1.89338	6.80911	0.0245068	0.357173	yes	Cpeb3	cytoplasmic polyadenylation element binding protein 3
Dynlt1a	1.08651	7.16815	0.0245234	0.357173	yes	Dynlt1a	dynein light chain Tctex-type 1A
Ppp1r2	1.60825	6.93696	0.0245353	0.357173	yes	Ppp1r2	protein phosphatase 1, regulatory inhibitor subunit 2
Mapt	2.33581	6.55639	0.0245457	0.357173	yes	Mapt	microtubule-associated protein tau
Cab39l	1.01488	7.18491	0.0245801	0.357437	yes	Cab39l	calcium binding protein 39-like
Gm54229	-0.501103	7.78781	0.0246175	0.357575	yes	Gm54229	predicted gene, 54229
Mzt1	2.51067	5.71829	0.0246221	0.357575	yes	Mzt1	mitotic spindle organizing protein 1
1500015A07Rik	0.410241	7.40225	0.0246596	0.357758	yes	1500015A07Rik	RIKEN cDNA 1500015A07 gene
Uchl1	1.61155	6.92251	0.0246674	0.357758	yes	Uchl1	ubiquitin carboxy-terminal hydrolase L1
Pcmt1	3.58708	4.30503	0.0247184	0.357818	yes	Pcmt1	protein-L-isoaspartate (D-aspartate) O-methyltransferase 1
Slamf9	-0.678599	-7.4338	0.024724	0.357818	yes	Slamf9	SLAM family member 9
H4c6	1.33954	7.06464	0.0247315	0.357818	yes	H4c6	H4 clustered histone 6
Gm41608	3.00114	5.3059	0.0247366	0.357818	yes	Gm41608	predicted gene, 41608
Pus10	-0.171573	7.59938	0.024787	0.358311	yes	Pus10	pseudouridylate synthase 10
9330133O14Rik	1.91916	6.78266	0.0248262	0.358317	yes	9330133O14Rik	RIKEN cDNA 9330133O14 gene
Rsad1	1.11414	7.13627	0.0248409	0.358317	yes	Rsad1	radical S-adenosyl methionine domain containing 1
Gm9354	6.20736	-3.71187	0.0248565	0.358317	yes	Gm9354	predicted gene 9354
Zfp566	-0.466841	-7.28172	0.0248681	0.358317	yes	Zfp566	zinc finger protein 566
Gm53576	-0.620795	-7.41391	0.0248767	0.358317	yes	Gm53576	predicted gene, 53576
Fam187b	0.907852	7.20462	0.0248867	0.358317	yes	Fam187b	family with sequence similarity 187, member B
Ampd3	0.34114	7.40694	0.0249111	0.358317	yes	Ampd3	adenosine monophosphate deaminase 3
Mmut	2.46018	6.46204	0.0249267	0.358317	yes	Mmut	methylmalonyl-Coenzyme A mutase
LOC118568469	1.08232	7.15389	0.0249343	0.358317	yes	LOC118568469	NHP2-like protein 1
Nqo2	1.05265	7.14753	0.0249659	0.35847	yes	Nqo2	N-ribosyldihydronicotinamide quinone reductase 2
Hic2	1.874	6.79182	0.0249931	0.35847	yes	Hic2	hypermethylated in cancer 2
Fam78b	-0.731421	-7.43369	0.024994	0.35847	yes	Fam78b	family with sequence similarity 78, member B
Gnat2	-0.371918	7.66426	0.0250501	0.358886	yes	Gnat2	G protein subunit alpha transducin 2
Gm39198	0.854779	-6.72903	0.0250556	0.358886	yes	Gm39198	predicted gene, 39198
Dctd	1.43976	6.98524	0.0250835	0.35905	yes	Dctd	dCMP deaminase
Rab6a	1.24329	7.07318	0.0251848	0.359893	yes	Rab6a	RAB6A, member RAS oncogene family
Exosc8	0.868056	7.2008	0.0251939	0.359893	yes	Exosc8	exosome component 8
Mgp	3.47405	5.8125	0.0252352	0.359893	yes	Mgp	matrix Gla protein
Edn2	1.32521	7.04186	0.0252378	0.359893	yes	Edn2	endothelin 2
Gm53865	0.507204	7.34031	0.0252378	0.359893	yes	Gm53865	predicted gene, 53865
Sgip1	-0.543482	7.77565	0.0252433	0.359893	yes	Sgip1	SH3-domain GRB2-like (endophilin) interacting protein 1
Hpdl	1.58466	6.9005	0.0252914	0.359893	yes	Hpdl	4-hydroxyphenylpyruvate dioxygenase-like
Nus1	1.60254	6.89002	0.025304	0.359893	yes	Nus1	NUS1 dehydrodolichyl diphosphate synthase subunit
Car13	1.95943	6.73114	0.0253073	0.359893	yes	Car13	carbonic anhydrase 13
Rras2	0.751818	7.24713	0.0253272	0.359893	yes	Rras2	related RAS viral (r-ras) oncogene 2
Wfs1	1.56871	6.91183	0.0253547	0.359893	yes	Wfs1	wolframin ER transmembrane glycoprotein
Tnfaip8l1	2.04461	6.08334	0.0253548	0.359893	yes	Tnfaip8l1	tumor necrosis factor, alpha-induced protein 8-like 1
Shoc2	3.63933	4.24187	0.0253631	0.359893	yes	Shoc2	Shoc2, leucine rich repeat scaffold protein
Upb1	2.24051	6.56215	0.0253718	0.359893	yes	Upb1	ureidopropionase, beta
Vmo1	-0.535269	-7.28803	0.0254186	0.360047	yes	Vmo1	vitelline membrane outer layer 1 homolog (chicken)
Ldhd	1.22097	7.08083	0.0254248	0.360047	yes	Ldhd	lactate dehydrogenase D
Ptpdc1	-0.093508	-7.06023	0.0254319	0.360047	yes	Ptpdc1	protein tyrosine phosphatase domain containing 1
Rab5a	1.42476	6.97122	0.0254772	0.360457	yes	Rab5a	RAB5A, member RAS oncogene family
Sirt6	1.4389	6.96707	0.0255365	0.360969	yes	Sirt6	sirtuin 6
Ly6g2	2.08371	6.64003	0.0255463	0.360969	yes	Ly6g2	lymphocyte antigen 6 complex, locus G2
Mylip	0.517942	7.30611	0.025565	0.361001	yes	Mylip	myosin regulatory light chain interacting protein
Snhg7	1.7458	6.81195	0.0255872	0.361075	yes	Snhg7	small nucleolar RNA host gene 7
Gramd1c	1.42307	6.96466	0.0256031	0.361075	yes	Gramd1c	GRAM domain containing 1C
Commd8	1.78789	6.7915	0.0256396	0.361357	yes	Commd8	COMM domain containing 8
Api5	0.648645	7.27295	0.0256729	0.361594	yes	Api5	apoptosis inhibitor 5
Nab1	1.2923	7.02993	0.0257115	0.361894	yes	Nab1	Ngfi-A binding protein 1
Gm2756	1.17819	7.06308	0.0257282	0.361894	yes	Gm2756	predicted gene 2756
4933400F21Rik	2.34975	5.78356	0.0257443	0.361894	yes	4933400F21Rik	RIKEN cDNA 4933400F21 gene
Psmd10	-0.186284	-7.05995	0.0257601	0.361894	yes	Psmd10	proteasome (prosome, macropain) 26S subunit, non-ATPase, 10
Rbakdn	1.00546	7.1315	0.0257887	0.362065	yes	Rbakdn	RB-associated KRAB zinc finger downstream neighbor (non-protein coding)
Slc9a5	1.31338	7.02488	0.0258141	0.362102	yes	Slc9a5	solute carrier family 9 (sodium/hydrogen exchanger), member 5
Tmem165	1.12522	7.06664	0.0258372	0.362102	yes	Tmem165	transmembrane protein 165
Il20rb	-0.291035	-7.09221	0.0258409	0.362102	yes	Il20rb	interleukin 20 receptor beta
Usp30	3.02829	5.0348	0.0258582	0.362114	yes	Usp30	ubiquitin specific peptidase 30
Fam53a	3.76404	4.16194	0.0258917	0.362352	yes	Fam53a	family with sequence similarity 53, member A
Capza2	1.15193	7.06885	0.0259259	0.362462	yes	Capza2	capping actin protein of muscle Z-line subunit alpha 2
Lysmd4	2.26021	6.51376	0.0259326	0.362462	yes	Lysmd4	LysM, putative peptidoglycan-binding, domain containing 4
Slc9b1	-0.484069	-7.21122	0.0259543	0.362482	yes	Slc9b1	solute carrier family 9, subfamily B (NHA1, cation proton antiporter 1), member 1
Hdac11	3.37913	4.48988	0.025967	0.362482	yes	Hdac11	histone deacetylase 11
Rab33b	2.05856	6.63135	0.0259839	0.362488	yes	Rab33b	RAB33B, member RAS oncogene family
Gm19437	1.52128	6.89302	0.0260135	0.362537	yes	Gm19437	predicted gene, 19437
Reg1	4.19043	-5.14141	0.0260326	0.362537	yes	Reg1	regenerating islet-derived 1
Epha2	5.29367	-2.90761	0.026037	0.362537	yes	Epha2	Eph receptor A2
Gm53896	0.879814	7.14473	0.0260552	0.36256	yes	Gm53896	predicted gene, 53896
Penk	0.951616	7.13186	0.0260918	0.362839	yes	Penk	preproenkephalin
Ythdf2	1.60244	6.84419	0.0261348	0.362948	yes	Ythdf2	YTH N6-methyladenosine RNA binding protein 2
4930503L19Rik	-0.701838	-7.32822	0.0261492	0.362948	yes	4930503L19Rik	RIKEN cDNA 4930503L19 gene
Stk38	4.04094	3.92432	0.0261647	0.362948	yes	Stk38	serine/threonine kinase 38
Stambp	1.62188	6.83151	0.0261657	0.362948	yes	Stambp	STAM binding protein
Trim46	1.22572	7.01719	0.0262063	0.36316	yes	Trim46	tripartite motif-containing 46
Faim2	0.0395603	7.44998	0.0262294	0.36316	yes	Faim2	Fas apoptotic inhibitory molecule 2
Ggcx	2.37791	6.44168	0.0262306	0.36316	yes	Ggcx	gamma-glutamyl carboxylase
Tmem128	1.60826	6.82959	0.0262978	0.363861	yes	Tmem128	transmembrane protein 128
Adpgk	1.12397	7.04075	0.0263427	0.364071	yes	Adpgk	ADP-dependent glucokinase
Crtap	1.20187	7.0127	0.0263984	0.364071	yes	Crtap	cartilage associated protein
Lsm8	1.30263	6.98478	0.0264029	0.364071	yes	Lsm8	LSM8 homolog, U6 small nuclear RNA associated
Zfp346	1.94947	6.06552	0.0264054	0.364071	yes	Zfp346	zinc finger protein 346
Ranbp10	2.37221	-5.35721	0.0264238	0.364071	yes	Ranbp10	RAN binding protein 10
Dcst1	1.16079	7.02136	0.0264307	0.364071	yes	Dcst1	DC-STAMP domain containing 1
Gnao1	2.17859	6.53139	0.0264783	0.364071	yes	Gnao1	guanine nucleotide binding protein, alpha O
Acyp1	2.32299	5.76068	0.0264801	0.364071	yes	Acyp1	acylphosphatase 1, erythrocyte (common) type
Atp5b	10.2766	1.57692	0.0264809	0.364071	yes	Atp5b	ATP synthase, H+ transporting mitochondrial F1 complex, beta subunit
Clock	1.40402	6.92265	0.0264874	0.364071	yes	Clock	circadian locomotor output cycles kaput
Setd7	1.46473	6.88546	0.0265039	0.364071	yes	Setd7	SET domain containing (lysine methyltransferase) 7
H4c2	0.397962	-6.81613	0.026512	0.364071	yes	H4c2	H4 clustered histone 2
Pnck	1.18136	7.00315	0.026612	0.365216	yes	Pnck	pregnancy upregulated non-ubiquitously expressed CaM kinase
Nmrk1	0.200288	7.32618	0.026693	0.365682	yes	Nmrk1	nicotinamide riboside kinase 1
Hmmr	0.492869	7.23213	0.026711	0.365682	yes	Hmmr	hyaluronan mediated motility receptor (RHAMM)
Npas2	2.97121	-4.77643	0.0267442	0.365682	yes	Npas2	neuronal PAS domain protein 2
Cd27	2.89519	6.11745	0.0267498	0.365682	yes	Cd27	CD27 antigen
Gm19624	1.25646	6.97515	0.0267689	0.365682	yes	Gm19624	predicted gene, 19624
Tie1	1.74083	6.76086	0.0267805	0.365682	yes	Tie1	tyrosine kinase with immunoglobulin-like and EGF-like domains 1
Grm4	0.700896	7.17431	0.0267889	0.365682	yes	Grm4	glutamate receptor, metabotropic 4
Car5b	1.48569	-6.29176	0.0268473	0.365682	yes	Car5b	carbonic anhydrase 5b, mitochondrial
9930111J21Rik1	-0.310473	-7.02617	0.0268719	0.365682	yes	9930111J21Rik1	RIKEN cDNA 9930111J21 gene 1
Mief1	1.41208	6.89716	0.0268761	0.365682	yes	Mief1	mitochondrial elongation factor 1
Tent4a	1.3191	6.94439	0.0269086	0.365682	yes	Tent4a	terminal nucleotidyltransferase 4A
Cyb561d2	1.56543	6.8205	0.0269134	0.365682	yes	Cyb561d2	cytochrome b-561 domain containing 2
Gm54309	-0.234071	-6.99228	0.0269174	0.365682	yes	Gm54309	predicted gene, 54309
1700003E16Rik	-0.0567276	7.4189	0.0269214	0.365682	yes	1700003E16Rik	RIKEN cDNA 1700003E16 gene
Arhgap11a	0.54745	7.21088	0.0269305	0.365682	yes	Arhgap11a	Rho GTPase activating protein 11A
Abca3	1.20465	6.98073	0.0269313	0.365682	yes	Abca3	ATP-binding cassette, sub-family A (ABC1), member 3
Defa37	4.14228	-3.69182	0.0269335	0.365682	yes	Defa37	defensin, alpha, 37
4930435F18Rik	0.697841	7.1689	0.0269539	0.365682	yes	4930435F18Rik	RIKEN cDNA 4930435F18 gene
Gm2788	-0.127484	-6.95766	0.0269719	0.365682	yes	Gm2788	predicted gene 2788
Zfp30	0.754747	-6.68647	0.0269953	0.365682	yes	Zfp30	zinc finger protein 30
Gm12444	0.522728	7.20696	0.0270028	0.365682	yes	Gm12444	predicted gene 12444
Rpl7	3.40409	4.52318	0.0270123	0.365682	yes	Rpl7	ribosomal protein L7
Ccl22	1.82597	6.70047	0.0270555	0.366041	yes	Ccl22	chemokine (C-C motif) ligand 22
Trnt1	0.231404	7.28301	0.0271312	0.366839	yes	Trnt1	tRNA nucleotidyl transferase, CCA-adding, 1
Etfrf1	0.875206	7.07147	0.027159	0.366896	yes	Etfrf1	electron transfer flavoprotein regulatory factor 1
E2f5	0.383534	7.23714	0.0271808	0.366896	yes	E2f5	E2F transcription factor 5
Ppwd1	1.43681	6.86295	0.0271855	0.366896	yes	Ppwd1	peptidylprolyl isomerase domain and WD repeat containing 1
Fam161a	0.277743	7.2746	0.0272215	0.366982	yes	Fam161a	family with sequence similarity 161, member A
Pggt1b	5.122	-2.99056	0.0272253	0.366982	yes	Pggt1b	protein geranylgeranyltransferase type I, beta subunit
Cdh13	1.44631	6.8521	0.0272727	0.367353	yes	Cdh13	cadherin 13
Gatad1	1.73039	6.71739	0.0272982	0.367353	yes	Gatad1	GATA zinc finger domain containing 1
Sh3rf2	1.01476	7.01119	0.027303	0.367353	yes	Sh3rf2	SH3 domain containing ring finger 2
Mavs	3.75766	4.05086	0.0273443	0.367682	yes	Mavs	mitochondrial antiviral signaling protein
Gm39628	0.851649	7.07145	0.0274191	0.368404	yes	Gm39628	predicted gene, 39628
Cep55	-0.385344	7.48751	0.027439	0.368404	yes	Cep55	centrosomal protein 55
Abca5	-0.809763	-7.28288	0.0274483	0.368404	yes	Abca5	ATP-binding cassette, sub-family A (ABC1), member 5
Snapc4	1.60342	6.76448	0.0274929	0.368619	yes	Snapc4	small nuclear RNA activating complex, polypeptide 4
Ccdc43	0.863514	7.05524	0.0275133	0.368619	yes	Ccdc43	coiled-coil domain containing 43
Gm35641	-0.783609	7.72892	0.0275626	0.368619	yes	Gm35641	predicted gene, 35641
Gm16222	0.480341	7.18153	0.027563	0.368619	yes	Gm16222	predicted gene 16222
Cyp3a13	1.08853	6.96944	0.0276072	0.368619	yes	Cyp3a13	cytochrome P450, family 3, subfamily a, polypeptide 13
Cacna1h	1.86687	6.63995	0.0276697	0.368619	yes	Cacna1h	calcium channel, voltage-dependent, T type, alpha 1H subunit
Pitrm1	-0.281912	-6.95713	0.0276785	0.368619	yes	Pitrm1	pitrilysin metallepetidase 1
Rhot1	2.88082	5.08245	0.0276868	0.368619	yes	Rhot1	ras homolog family member T1
Zdhhc20	5.7291	2.62462	0.0276896	0.368619	yes	Zdhhc20	zinc finger, DHHC domain containing 20
Pcca	0.685182	7.12904	0.0277046	0.368619	yes	Pcca	propionyl-Coenzyme A carboxylase, alpha polypeptide
Zmiz1os1	1.8453	-5.80124	0.0277585	0.368619	yes	Zmiz1os1	Zmiz1 opposite strand 1
Efnb2	0.186864	7.25762	0.0277615	0.368619	yes	Efnb2	ephrin B2
Sp2	0.887101	7.03046	0.0278033	0.368619	yes	Sp2	Sp2 transcription factor
Slc23a4	6.10917	-2.48084	0.027813	0.368619	yes	Slc23a4	solute carrier family 23 member 4
Ccdc80	3.35862	4.60276	0.0278138	0.368619	yes	Ccdc80	coiled-coil domain containing 80
Dock1	1.74453	6.69015	0.0278342	0.368619	yes	Dock1	dedicator of cytokinesis 1
Gm54189	1.30985	6.89407	0.0278367	0.368619	yes	Gm54189	predicted gene, 54189
Gm46764	-0.213703	-6.92153	0.0278423	0.368619	yes	Gm46764	predicted gene, 46764
2610318N02Rik	0.600434	7.14103	0.0278465	0.368619	yes	2610318N02Rik	RIKEN cDNA 2610318N02 gene
Tnfaip3	-0.240563	7.39096	0.0278518	0.368619	yes	Tnfaip3	tumor necrosis factor, alpha-induced protein 3
Scube2	1.26907	6.90476	0.0278588	0.368619	yes	Scube2	signal peptide, CUB domain, EGF-like 2
Ppp2cb	1.35444	6.86831	0.0278914	0.368619	yes	Ppp2cb	protein phosphatase 2 (formerly 2A), catalytic subunit, beta isoform
Gm13421	1.24367	6.91337	0.0279004	0.368619	yes	Gm13421	predicted gene 13421
Entpd1	0.741901	7.08635	0.02792	0.368619	yes	Entpd1	ectonucleoside triphosphate diphosphohydrolase 1
Vps13b	0.0879248	7.29478	0.0279377	0.368619	yes	Vps13b	vacuolar protein sorting 13B
Niban3	0.225168	-6.77037	0.0279417	0.368619	yes	Niban3	niban apoptosis regulator 3
Slc44a1	3.06826	4.74633	0.0279425	0.368619	yes	Slc44a1	solute carrier family 44, member 1
Ret	1.19934	6.91899	0.02796	0.368619	yes	Ret	ret proto-oncogene
Wdpcp	1.39571	6.83815	0.0279793	0.368619	yes	Wdpcp	WD repeat containing planar cell polarity effector
Cc2d1a	5.38585	2.8259	0.0279927	0.368619	yes	Cc2d1a	coiled-coil and C2 domain containing 1A
1810034E14Rik	0.735737	7.08426	0.0280181	0.368619	yes	1810034E14Rik	RIKEN cDNA 1810034E14 gene
Gm46946	3.79545	-3.98761	0.0280238	0.368619	yes	Gm46946	predicted gene, 46946
Nnt	1.07776	6.94786	0.0280296	0.368619	yes	Nnt	nicotinamide nucleotide transhydrogenase
2810408B13Rik	3.6708	-4.04941	0.0280478	0.368619	yes	2810408B13Rik	RIKEN cDNA 2810408B13 gene
Gm54042	1.78563	6.65842	0.0280518	0.368619	yes	Gm54042	predicted gene, 54042
Cd101	0.305041	7.19385	0.0280917	0.368922	yes	Cd101	CD101 antigen
Postn	-0.781969	-7.21414	0.028143	0.369375	yes	Postn	periostin, osteoblast specific factor
Dnaaf1	3.73879	4.08616	0.0281761	0.369521	yes	Dnaaf1	dynein, axonemal assembly factor 1
Gm38882	1.63402	-6.01647	0.0281878	0.369521	yes	Gm38882	predicted gene, 38882
Tnks	1.10401	6.93634	0.02821	0.369591	yes	Tnks	tankyrase, TRF1-interacting ankyrin-related ADP-ribose polymerase
H2bc13	0.462859	7.13602	0.0283085	0.370162	yes	H2bc13	H2B clustered histone 13
Gm34147	0.163241	-6.79174	0.0283192	0.370162	yes	Gm34147	predicted gene, 34147
H2ac25	0.771124	7.04481	0.0283285	0.370162	yes	H2ac25	H2A clustered histone 25
Epha8	-0.802209	7.6799	0.0283649	0.370162	yes	Epha8	Eph receptor A8
Gpbp1	0.833433	-6.5565	0.0283895	0.370162	yes	Gpbp1	GC-rich promoter binding protein 1
Yme1l1	0.386848	7.14697	0.0284089	0.370162	yes	Yme1l1	YME1-like 1 (S. cerevisiae)
Prr11	-0.499552	7.50099	0.0284142	0.370162	yes	Prr11	proline rich 11
Ubp1	2.14362	6.46445	0.0284227	0.370162	yes	Ubp1	upstream binding protein 1
Gm33114	-0.811389	7.67992	0.0284359	0.370162	yes	Gm33114	predicted gene, 33114
Hkdc1	6.54562	2.31659	0.0284467	0.370162	yes	Hkdc1	hexokinase domain containing 1
Cfap141	0.419734	-6.6863	0.0284608	0.370162	yes	Cfap141	cilia and flagella associated protein 141
Gm20604	0.956605	6.96567	0.0284619	0.370162	yes	Gm20604	predicted gene 20604
Gjc2	0.657333	7.09013	0.0284811	0.370162	yes	Gjc2	gap junction protein, gamma 2
Gm38970	0.977146	6.58585	0.0284896	0.370162	yes	Gm38970	predicted gene, 38970
Uhmk1	2.3549	6.34683	0.0285308	0.370191	yes	Uhmk1	U2AF homology motif (UHM) kinase 1
Ankrd50	2.97531	4.80637	0.0285728	0.370191	yes	Ankrd50	ankyrin repeat domain 50
Wdr88	-0.873286	-7.24245	0.0285884	0.370191	yes	Wdr88	WD repeat domain 88
Gm36262	0.370617	7.14395	0.0286092	0.370191	yes	Gm36262	predicted gene, 36262
Lgr4	1.46282	6.76545	0.0286416	0.370191	yes	Lgr4	leucine-rich repeat-containing G protein-coupled receptor 4
Spdl1	1.20433	6.87695	0.0286518	0.370191	yes	Spdl1	spindle apparatus coiled-coil protein 1
Gm46098	-0.651203	-7.12275	0.0286753	0.370191	yes	Gm46098	predicted gene, 46098
Gm32856	1.53793	6.73688	0.0286766	0.370191	yes	Gm32856	predicted gene, 32856
H2-Q5	0.951196	6.96986	0.0286818	0.370191	yes	H2-Q5	histocompatibility 2, Q region locus 5
Btnl5-ps	1.51672	6.74091	0.0286843	0.370191	yes	Btnl5-ps	butyrophilin-like 5, pseudogene
Gm32123	-0.920389	-7.2718	0.0286872	0.370191	yes	Gm32123	predicted gene, 32123
Mcm4	1.99088	6.5351	0.0287192	0.370191	yes	Mcm4	minichromosome maintenance complex component 4
4930528D03Rik	1.32557	6.83772	0.0287218	0.370191	yes	4930528D03Rik	RIKEN cDNA 4930528D03 gene
Eif3g	0.931266	6.95905	0.0287369	0.370191	yes	Eif3g	eukaryotic translation initiation factor 3, subunit G
Sdk2	-0.253779	7.34264	0.0287446	0.370191	yes	Sdk2	sidekick cell adhesion molecule 2
H4c1	0.0337426	7.2628	0.0288677	0.37095	yes	H4c1	H4 clustered histone 1
Cfap157	0.0100946	-6.81593	0.0288677	0.37095	yes	Cfap157	cilia and flagella associated protein 157
Eif2b3	1.65275	6.67347	0.0288815	0.37095	yes	Eif2b3	eukaryotic translation initiation factor 2B, subunit 3
Tmprss5	0.00846925	7.26845	0.0288929	0.37095	yes	Tmprss5	transmembrane protease, serine 5 (spinesin)
Cryz	1.91944	5.96981	0.0288986	0.37095	yes	Cryz	crystallin, zeta
Txnrd3	2.686	-4.93732	0.028905	0.37095	yes	Txnrd3	thioredoxin reductase 3
Brf2	1.35078	6.80767	0.0289405	0.371189	yes	Brf2	BRF2, RNA polymerase III transcription initiation factor 50kDa subunit
Gm36457	-0.165641	7.29059	0.0290287	0.371725	yes	Gm36457	predicted gene, 36457
Dhrs7	0.829073	6.97854	0.0290341	0.371725	yes	Dhrs7	dehydrogenase/reductase (SDR family) member 7
Ccne2	-0.569906	7.52097	0.02904	0.371725	yes	Ccne2	cyclin E2
Tmem98	3.02267	4.82514	0.0290643	0.371725	yes	Tmem98	transmembrane protein 98
Nsl1	2.79977	5.28829	0.0290733	0.371725	yes	Nsl1	NSL1, MIS12 kinetochore complex component
Prtn3	0.395703	-6.64489	0.0290838	0.371725	yes	Prtn3	proteinase 3
Gm46687	0.158188	7.19197	0.0291432	0.372266	yes	Gm46687	predicted gene, 46687
Insig2	2.02056	6.48798	0.029225	0.372814	yes	Insig2	insulin induced gene 2
Iftap	1.3462	-6.18335	0.0292521	0.372814	yes	Iftap	intraflagellar transport associated protein
Gm7931	1.46288	6.73288	0.0292523	0.372814	yes	Gm7931	predicted pseudogene 7931
Ovca2	2.3285	6.36414	0.0292724	0.372814	yes	Ovca2	candidate tumor suppressor in ovarian cancer 2
Mix23	2.10495	6.437	0.0293078	0.372814	yes	Mix23	mitochondrial matrix import factor 23
Marchf7	1.49165	6.71557	0.0293173	0.372814	yes	Marchf7	membrane associated ring-CH-type finger 7
Wnt5b	1.34577	6.78898	0.0293182	0.372814	yes	Wnt5b	wingless-type MMTV integration site family, member 5B
Sesn2	0.297616	7.13582	0.0293333	0.372814	yes	Sesn2	sestrin 2
Styx	1.17035	6.84871	0.0293388	0.372814	yes	Styx	serine/threonine/tyrosine interaction protein
Gm31597	-0.185324	7.27152	0.0293669	0.372861	yes	Gm31597	predicted gene, 31597
Klhl42	-0.304223	7.32234	0.0293765	0.372861	yes	Klhl42	kelch-like 42
Ndufv3	8.14449	1.88932	0.0294254	0.372875	yes	Ndufv3	NADH:ubiquinone oxidoreductase core subunit V3
Slc17a4	1.19139	6.83572	0.0294415	0.372875	yes	Slc17a4	solute carrier family 17 (sodium phosphate), member 4
Zfp408	3.04529	4.87961	0.0294815	0.372875	yes	Zfp408	zinc finger protein 408
Slc20a1	0.237055	7.12738	0.0294877	0.372875	yes	Slc20a1	solute carrier family 20, member 1
Pfkfb2	0.47776	7.06372	0.0295082	0.372875	yes	Pfkfb2	6-phosphofructo-2-kinase/fructose-2,6-biphosphatase 2
Cd55	0.948124	6.91177	0.0295147	0.372875	yes	Cd55	CD55 molecule, decay accelerating factor for complement
Cyp4f18	1.05303	-6.33433	0.0295282	0.372875	yes	Cyp4f18	cytochrome P450, family 4, subfamily f, polypeptide 18
Tmtc4	0.206414	-6.68619	0.0295416	0.372875	yes	Tmtc4	transmembrane and tetratricopeptide repeat containing 4
Pak6	-0.087163	7.25146	0.0295595	0.372875	yes	Pak6	p21 (RAC1) activated kinase 6
Gm44502	3.03674	-4.58803	0.0295755	0.372875	yes	Gm44502	predicted readthrough transcript (NMD candidate), 44502
Cacna1c	1.71093	-5.89007	0.0296019	0.372875	yes	Cacna1c	calcium channel, voltage-dependent, L type, alpha 1C subunit
Vdac3	1.0043	6.88089	0.02961	0.372875	yes	Vdac3	voltage-dependent anion channel 3
Mroh6	0.17959	7.14506	0.029613	0.372875	yes	Mroh6	maestro heat-like repeat family member 6
Odf2l	2.19527	6.37523	0.0296153	0.372875	yes	Odf2l	outer dense fiber of sperm tails 2-like
Clybl	1.42491	6.73457	0.0296452	0.372912	yes	Clybl	citrate lyase beta like
Cbs	-0.376675	7.34222	0.0296722	0.372912	yes	Cbs	cystathionine beta-synthase
Gm26205	-0.628169	-7.05949	0.0296925	0.372912	yes	Gm26205	predicted gene, 26205
BC037032	-0.601438	7.49436	0.0296942	0.372912	yes	BC037032	cDNA Sequence BC037032
Col8a1	0.994968	-6.30421	0.0297032	0.372912	yes	Col8a1	collagen, type VIII, alpha 1
Hmgxb3	2.53861	5.29546	0.0297749	0.373465	yes	Hmgxb3	HMG box domain containing 3
Aqp8	2.43776	6.23691	0.0297813	0.373465	yes	Aqp8	aquaporin 8
Itga11	0.136729	7.14598	0.0298556	0.374027	yes	Itga11	integrin alpha 11
Gm41344	0.419082	7.05554	0.0298602	0.374027	yes	Gm41344	predicted gene, 41344
Pdpr	0.900073	6.90555	0.0298992	0.374229	yes	Pdpr	pyruvate dehydrogenase phosphatase regulatory subunit
Ubqln2	0.992699	6.86898	0.0299104	0.374229	yes	Ubqln2	ubiquilin 2
Wdr36	-0.0241226	7.20483	0.0299769	0.374848	yes	Wdr36	WD repeat domain 36
Cbln3	1.52926	6.66964	0.0300441	0.375321	yes	Cbln3	cerebellin 3 precursor protein
Kdm3a	0.903449	6.898	0.0300489	0.375321	yes	Kdm3a	lysine (K)-specific demethylase 3A
2610524H06Rik	0.717682	6.96749	0.0300667	0.375329	yes	2610524H06Rik	RIKEN cDNA 2610524H06 gene
Rbm4	1.55753	6.65086	0.0301051	0.375595	yes	Rbm4	RNA binding motif protein 4
Jag1	0.0925531	7.14813	0.0301853	0.376382	yes	Jag1	jagged 1
Kcnmb3	1.49196	6.67139	0.030227	0.376688	yes	Kcnmb3	potassium large conductance calcium-activated channel, subfamily M, beta member 3
Ces2c	3.45641	10.9619	0.0302564	0.376757	yes	Ces2c	carboxylesterase 2C
3930402G23Rik	1.30027	6.77143	0.0302669	0.376757	yes	3930402G23Rik	RIKEN cDNA 3930402G23 gene
Slc39a11	1.67071	6.04256	0.030329	0.377317	yes	Slc39a11	solute carrier family 39 (metal ion transporter), member 11
Mios	1.64717	6.60204	0.0303569	0.377416	yes	Mios	meiosis regulator for oocyte development
Slc31a2	1.66496	6.5854	0.0303722	0.377416	yes	Slc31a2	solute carrier family 31, member 2
Gm2137	-0.868398	7.57666	0.0304057	0.377416	yes	Gm2137	predicted gene 2137
Msx3	-0.868398	7.57666	0.0304057	0.377416	yes	Msx3	msh homeobox 3
Cnnm2	4.37364	3.40723	0.0304343	0.377452	yes	Cnnm2	cyclin M2
Adcy4	-0.579629	-6.9766	0.0304599	0.377452	yes	Adcy4	adenylate cyclase 4
Prpf40a	0.712563	6.94796	0.0304602	0.377452	yes	Prpf40a	pre-mRNA processing factor 40A
Cep97	-0.365898	-6.80769	0.0305285	0.377604	yes	Cep97	centrosomal protein 97
Gm14853	4.98834	3.00507	0.0305489	0.377604	yes	Gm14853	predicted gene 14853
Tmem135	0.653841	6.96714	0.0305813	0.377604	yes	Tmem135	transmembrane protein 135
Cox8b	0.167373	7.08828	0.0305885	0.377604	yes	Cox8b	cytochrome c oxidase subunit 8B
Tmem9	1.78886	6.52907	0.0306212	0.377604	yes	Tmem9	transmembrane protein 9
Foxo6os	-0.978132	-7.15308	0.0306451	0.377604	yes	Foxo6os	forkhead box O6, opposite strand
Gm36790	1.16707	6.78769	0.0306531	0.377604	yes	Gm36790	predicted gene, 36790
Gm52890	0.795165	6.89962	0.0306806	0.377604	yes	Gm52890	predicted gene, 52890
Pgc	-0.809017	7.52179	0.0306819	0.377604	yes	Pgc	progastricsin (pepsinogen C)
Gjb2	1.03974	6.8172	0.0306886	0.377604	yes	Gjb2	gap junction protein, beta 2
Slc12a6	0.281081	7.04083	0.0306991	0.377604	yes	Slc12a6	solute carrier family 12, member 6
Gm13584	1.24753	6.76127	0.0307051	0.377604	yes	Gm13584	predicted gene 13584
Aftph	1.026	-6.35741	0.0307147	0.377604	yes	Aftph	aftiphilin
Btnl2	1.51566	6.6346	0.030734	0.377604	yes	Btnl2	butyrophilin-like 2
Gm16685	0.471085	6.99349	0.0307373	0.377604	yes	Gm16685	predicted gene, 16685
Agbl5	0.552031	6.97697	0.0307543	0.377604	yes	Agbl5	ATP/GTP binding protein-like 5
Ophn1	-0.0550843	7.16023	0.0307692	0.377604	yes	Ophn1	oligophrenin 1
Psme4	0.74514	6.91858	0.0307832	0.377604	yes	Psme4	proteasome (prosome, macropain) activator subunit 4
Syce3	0.20025	7.06264	0.0307992	0.377604	yes	Syce3	synaptonemal complex central element protein 3
F830016B08Rik	2.35907	-5.17618	0.0308512	0.377859	yes	F830016B08Rik	RIKEN cDNA F830016B08 gene
A630001O12Rik	-0.44085	7.2879	0.0308605	0.377859	yes	A630001O12Rik	RIKEN cDNA A630001O12 gene
S1pr4	2.29892	5.41836	0.0308722	0.377859	yes	S1pr4	sphingosine-1-phosphate receptor 4
Tmem199	1.7014	6.55419	0.0308888	0.377859	yes	Tmem199	transmembrane protein 199
Spata6l	0.420668	6.98751	0.0309364	0.377881	yes	Spata6l	spermatogenesis associated 6 like
Try5	-0.84099	7.52191	0.0309549	0.377881	yes	Try5	trypsin 5
Ss18l1	1.65552	6.56451	0.0309559	0.377881	yes	Ss18l1	SS18, nBAF chromatin remodeling complex subunit like 1
Shisa8	0.989317	6.81916	0.0309594	0.377881	yes	Shisa8	shisa family member 8
Mthfsd	3.13309	4.47077	0.031016	0.378361	yes	Mthfsd	methenyltetrahydrofolate synthetase domain containing
Iqcn	-0.367463	7.23586	0.031034	0.37837	yes	Iqcn	IQ motif containing N
Ap1m2	5.84837	2.51906	0.0310655	0.378406	yes	Ap1m2	adaptor protein complex AP-1, mu 2 subunit
Ankrd40cl	1.58668	6.58291	0.0310803	0.378406	yes	Ankrd40cl	ANKRD40 C-terminal like
Gm6829	1.14959	6.76458	0.0310893	0.378406	yes	Gm6829	predicted pseudogene 6829
Fbxo38	0.660036	6.93829	0.0311305	0.378406	yes	Fbxo38	F-box protein 38
Toe1	1.24611	6.73572	0.0311471	0.378406	yes	Toe1	target of EGR1, member 1 (nuclear)
Tmem260	0.311742	7.00798	0.0311792	0.378406	yes	Tmem260	transmembrane protein 260
Slc36a4	-0.84783	-7.04474	0.0311811	0.378406	yes	Slc36a4	solute carrier family 36 (proton/amino acid symporter), member 4
Ppp1r2-ps2	1.00901	6.79829	0.0312087	0.378406	yes	Ppp1r2-ps2	protein phosphatase 1, regulatory (inhibitor) subunit 2, pseudogene 2
Adam23	-0.669318	-6.95555	0.0312133	0.378406	yes	Adam23	a disintegrin and metallopeptidase domain 23
Tmed7	1.63217	6.55692	0.0312309	0.378406	yes	Tmed7	transmembrane p24 trafficking protein 7
Clk4	0.766155	6.8831	0.0312356	0.378406	yes	Clk4	CDC like kinase 4
Stk17b	2.04738	-5.4054	0.0312465	0.378406	yes	Stk17b	serine/threonine kinase 17b (apoptosis-inducing)
A430035B10Rik	1.54287	6.60173	0.0312871	0.378406	yes	A430035B10Rik	RIKEN cDNA A430035B10 gene
Resf1	1.53768	6.59498	0.0313109	0.378406	yes	Resf1	retroelement silencing factor 1
Zmpste24	0.709405	6.90336	0.0313169	0.378406	yes	Zmpste24	zinc metallopeptidase, STE24
Eif4e3	5.67121	2.59373	0.0313212	0.378406	yes	Eif4e3	eukaryotic translation initiation factor 4E member 3
Zan	0.281801	7.00793	0.0313383	0.378406	yes	Zan	zonadhesin
Pts	1.93721	6.43243	0.0313471	0.378406	yes	Pts	6-pyruvoyl-tetrahydropterin synthase
Gm10029	5.50839	-2.67172	0.0314261	0.37886	yes	Gm10029	predicted gene 10029
Nthl1	1.13155	6.74868	0.0314409	0.37886	yes	Nthl1	nth (endonuclease III)-like 1 (E.coli)
Naa10	4.58571	3.25676	0.0314619	0.37886	yes	Naa10	N(alpha)-acetyltransferase 10, NatA catalytic subunit
Cul7	1.33622	6.68259	0.031466	0.37886	yes	Cul7	cullin 7
Pgm3	1.40446	6.65413	0.031471	0.37886	yes	Pgm3	phosphoglucomutase 3
Tcf19	1.45672	6.6219	0.0314962	0.378911	yes	Tcf19	transcription factor 19
Ndufa1	3.84437	3.86381	0.0315097	0.378911	yes	Ndufa1	NADH:ubiquinone oxidoreductase subunit A1
Gnrh1	0.538414	6.93526	0.0315594	0.379301	yes	Gnrh1	gonadotropin releasing hormone 1
Tent5c	-0.414293	-6.76764	0.0315857	0.379375	yes	Tent5c	terminal nucleotidyltransferase 5C
Ctdspl2	0.798071	6.84904	0.0316002	0.379375	yes	Ctdspl2	CTD (carboxy-terminal domain, RNA polymerase II, polypeptide A) small phosphatase like 2
Pira1	0.143349	7.04289	0.0316228	0.379381	yes	Pira1	paired-Ig-like receptor A1
Cdc42bpa	1.84412	6.46153	0.0316353	0.379381	yes	Cdc42bpa	CDC42 binding protein kinase alpha
Ninl	1.38462	-6.20794	0.0316614	0.379487	yes	Ninl	ninein-like
Ggnbp2os	1.75902	6.48989	0.0317135	0.379585	yes	Ggnbp2os	gametogenetin binding protein 2, opposite strand
Soat2	5.21594	2.85238	0.0317136	0.379585	yes	Soat2	sterol O-acyltransferase 2
Mcoln2	1.35134	-6.23046	0.0317214	0.379585	yes	Mcoln2	mucolipin 2
Ptk7	1.5752	-5.88385	0.0318125	0.380457	yes	Ptk7	PTK7 protein tyrosine kinase 7
Tedc1	2.89067	-4.74989	0.0318289	0.380457	yes	Tedc1	tubulin epsilon and delta complex 1
Grem1	2.75773	-4.76926	0.0319268	0.381302	yes	Grem1	gremlin 1, DAN family BMP antagonist
Tgfbr2	0.958315	6.77789	0.0319394	0.381302	yes	Tgfbr2	transforming growth factor, beta receptor II
Dck	0.276066	6.97403	0.0319517	0.381302	yes	Dck	deoxycytidine kinase
Rad23a	1.56566	6.55129	0.0319902	0.381397	yes	Rad23a	RAD23 homolog A, nucleotide excision repair protein
Fcsk	1.24512	6.68799	0.0319944	0.381397	yes	Fcsk	fucose kinase
Ttbk2	1.36398	6.64767	0.0320299	0.381612	yes	Ttbk2	tau tubulin kinase 2
Ica1	0.77292	6.84419	0.0320488	0.381631	yes	Ica1	islet cell autoantigen 1
Nsrp1	6.24098	-2.35846	0.032105	0.382075	yes	Nsrp1	nuclear speckle regulatory protein 1
Gm51704	0.410235	6.92275	0.0321328	0.382075	yes	Gm51704	predicted gene, 51704
Nptn	1.69379	6.48811	0.0321382	0.382075	yes	Nptn	neuroplastin
Tmco6	1.34744	6.64762	0.0322015	0.382619	yes	Tmco6	transmembrane and coiled-coil domains 6
Kcne3	2.27545	6.20878	0.0322399	0.382738	yes	Kcne3	potassium voltage-gated channel, Isk-related subfamily, gene 3
D930048N14Rik	0.696951	6.85772	0.0322658	0.382738	yes	D930048N14Rik	RIKEN cDNA D930048N14 gene
Cat	3.94359	3.73862	0.0322668	0.382738	yes	Cat	catalase
Pax8	1.44814	6.5896	0.0322812	0.382738	yes	Pax8	paired box 8
Slc30a5	0.820957	6.8018	0.0323197	0.382846	yes	Slc30a5	solute carrier family 30 (zinc transporter), member 5
Tbc1d30	1.60194	-6.02633	0.0323252	0.382846	yes	Tbc1d30	TBC1 domain family, member 30
Nubpl	-0.623656	-6.87644	0.0323631	0.3829	yes	Nubpl	nucleotide binding protein-like
Laptm4b	4.20213	3.62505	0.0324011	0.3829	yes	Laptm4b	lysosomal-associated protein transmembrane 4B
Muc5b	-0.897751	7.46533	0.032416	0.3829	yes	Muc5b	mucin 5, subtype B, tracheobronchial
Immt	6.11616	2.40263	0.0324431	0.3829	yes	Immt	inner membrane protein, mitochondrial
Dcun1d2	1.38772	6.61241	0.0324441	0.3829	yes	Dcun1d2	DCN1, defective in cullin neddylation 1, domain containing 2 (S. cerevisiae)
Ces2g	0.887832	6.77036	0.032454	0.3829	yes	Ces2g	carboxylesterase 2G
Eif2s3x	0.85391	6.78086	0.0324546	0.3829	yes	Eif2s3x	eukaryotic translation initiation factor 2, subunit 3, structural gene X-linked
Abt1	1.62326	6.50424	0.032481	0.3829	yes	Abt1	activator of basal transcription 1
Cep19	0.709972	6.83941	0.0324867	0.3829	yes	Cep19	centrosomal protein 19
Gm8801	2.23594	5.22356	0.0325275	0.383048	yes	Gm8801	predicted gene 8801
9630028I04Rik	0.0160194	7.06295	0.0325342	0.383048	yes	9630028I04Rik	RIKEN cDNA 9630028I04 gene
Wtap	1.46478	6.56932	0.0326254	0.383363	yes	Wtap	WT1 associating protein
Arhgap8	1.34267	6.61903	0.0326728	0.383363	yes	Arhgap8	Rho GTPase activating protein 8
Gm36299	-0.997087	-7.02379	0.0326751	0.383363	yes	Gm36299	predicted gene, 36299
Zfyve16	0.512676	6.87532	0.0326797	0.383363	yes	Zfyve16	zinc finger, FYVE domain containing 16
Gm23849	0.187306	6.9588	0.0327021	0.383363	yes	Gm23849	predicted gene, 23849
Gm23971	0.187306	6.9588	0.0327021	0.383363	yes	Gm23971	predicted gene, 23971
Gm24950	0.187306	6.9588	0.0327021	0.383363	yes	Gm24950	predicted gene, 24950
Rnf146	1.29024	6.64756	0.0327022	0.383363	yes	Rnf146	ring finger protein 146
Rad52	-0.0305829	7.04262	0.0327223	0.383363	yes	Rad52	RAD52 homolog, DNA repair protein
Rps19bp1	2.79971	4.8337	0.0327402	0.383363	yes	Rps19bp1	ribosomal protein S19 binding protein 1
Zfp319	-0.834326	-6.9347	0.0327537	0.383363	yes	Zfp319	zinc finger protein 319
Pip4p2	0.853663	6.76167	0.0328118	0.383363	yes	Pip4p2	phosphatidylinositol-4,5-bisphosphate 4-phosphatase 2
2410080I02Rik	-0.0295143	7.04987	0.032819	0.383363	yes	2410080I02Rik	RIKEN cDNA 2410080I02 gene
Ehbp1	2.62606	5.12833	0.0328342	0.383363	yes	Ehbp1	EH domain binding protein 1
4930519L02Rik	1.98898	6.3453	0.0328356	0.383363	yes	4930519L02Rik	RIKEN cDNA 4930519L02 gene
Lat2	1.15794	6.24702	0.0328468	0.383363	yes	Lat2	linker for activation of T cells family, member 2
Cxcl11	0.552453	6.86309	0.0328587	0.383363	yes	Cxcl11	chemokine (C-X-C motif) ligand 11
Isg20l2	0.253619	6.92639	0.0328752	0.383363	yes	Isg20l2	interferon stimulated exonuclease gene 20-like 2
Gm31204	1.36102	6.60069	0.0329127	0.383468	yes	Gm31204	predicted gene, 31204
Bbof1	2.16181	-5.24199	0.0329217	0.383468	yes	Bbof1	basal body orientation factor 1
5430431A17Rik	0.505424	6.85972	0.0329605	0.383468	yes	5430431A17Rik	RIKEN cDNA 5430431A17 gene
Tmtc2	0.981057	6.71779	0.0329702	0.383468	yes	Tmtc2	transmembrane and tetratricopeptide repeat containing 2
Rnase1	0.465395	6.88184	0.0329929	0.383468	yes	Rnase1	ribonuclease, RNase A family, 1 (pancreatic)
Gm8062	-1.07634	-7.04467	0.0329976	0.383468	yes	Gm8062	predicted pseudogene 8062
Ccdc28b	0.757142	6.78985	0.0330313	0.383468	yes	Ccdc28b	coiled coil domain containing 28B
Zfp41	-0.323745	7.09446	0.0330476	0.383468	yes	Zfp41	zinc finger protein 41
Pllp	1.24552	6.63507	0.0330596	0.383468	yes	Pllp	plasma membrane proteolipid
Slc25a33	1.28956	6.63087	0.0330602	0.383468	yes	Slc25a33	solute carrier family 25, member 33
Tatdn3	0.957834	6.71209	0.0330871	0.383468	yes	Tatdn3	TatD DNase domain containing 3
Casp8ap2	4.61816	-3.17072	0.0330938	0.383468	yes	Casp8ap2	caspase 8 associated protein 2
Nnat	2.36629	5.17602	0.0331805	0.383592	yes	Nnat	neuronatin
Zfp850	0.0221933	7.00747	0.0332539	0.383592	yes	Zfp850	zinc finger protein 850
Mcm8	0.130518	6.95647	0.0332561	0.383592	yes	Mcm8	minichromosome maintenance 8 homologous recombination repair factor
Zfp866	0.00136999	7.00745	0.0332863	0.383592	yes	Zfp866	zinc finger protein 866
Slc23a2	1.80447	5.83785	0.033311	0.383592	yes	Slc23a2	solute carrier family 23 (nucleobase transporters), member 2
Capn8	0.426108	6.85505	0.0333178	0.383592	yes	Capn8	calpain 8
Gm4275	0.836514	-6.23603	0.033354	0.383592	yes	Gm4275	predicted gene 4275
Dnm1l	4.77504	3.13591	0.0333849	0.383592	yes	Dnm1l	dynamin 1-like
Ada	8.2752	-2.6419	0.0334144	0.383592	yes	Ada	adenosine deaminase
Stk24	4.73282	3.10509	0.0334203	0.383592	yes	Stk24	serine/threonine kinase 24
Erap1	1.66175	6.44744	0.033435	0.383592	yes	Erap1	endoplasmic reticulum aminopeptidase 1
Gm2093	-0.639056	7.27913	0.0334687	0.383592	yes	Gm2093	predicted gene 2093
Clcn2	4.65407	3.18518	0.0334843	0.383592	yes	Clcn2	chloride channel, voltage-sensitive 2
Slc35a2	1.9112	6.34918	0.0335091	0.383592	yes	Slc35a2	solute carrier family 35 (UDP-galactose transporter), member A2
Gpd1	8.79038	1.73048	0.0335187	0.383592	yes	Gpd1	glycerol-3-phosphate dehydrogenase 1 (soluble)
Polr3a	2.34395	5.31558	0.0335284	0.383592	yes	Polr3a	polymerase (RNA) III (DNA directed) polypeptide A
Klhl8	0.642426	6.81039	0.0335405	0.383592	yes	Klhl8	kelch-like 8
Pygl	0.222636	-6.46745	0.0335437	0.383592	yes	Pygl	liver glycogen phosphorylase
C1qtnf6	1.56801	6.01523	0.0335441	0.383592	yes	C1qtnf6	C1q and tumor necrosis factor related protein 6
Cdkn3	0.555276	6.82549	0.0335515	0.383592	yes	Cdkn3	cyclin-dependent kinase inhibitor 3
Recql	1.16303	-6.03128	0.0335692	0.383592	yes	Recql	RecQ protein-like
Wdr59	0.361892	6.85696	0.0335767	0.383592	yes	Wdr59	WD repeat domain 59
Adam10	0.909328	6.70684	0.0335871	0.383592	yes	Adam10	a disintegrin and metallopeptidase domain 10
Cap2	0.614344	6.80883	0.0335905	0.383592	yes	Cap2	CAP, adenylate cyclase-associated protein, 2 (yeast)
Nucb2	2.01299	6.29457	0.0335918	0.383592	yes	Nucb2	nucleobindin 2
Med18	-0.249877	7.03764	0.0336026	0.383592	yes	Med18	mediator complex subunit 18
F2rl1	0.637557	6.80602	0.0336145	0.383592	yes	F2rl1	coagulation factor II (thrombin) receptor-like 1
Armc2	-0.144471	7.00616	0.0336156	0.383592	yes	Armc2	armadillo repeat containing 2
4632404H12Rik	-0.901775	-6.91888	0.0336436	0.383592	yes	4632404H12Rik	RIKEN cDNA 4632404H12 gene
Ipo8	1.66808	6.42685	0.0336925	0.383592	yes	Ipo8	importin 8
Plekhg3	2.78625	4.83103	0.0337012	0.383592	yes	Plekhg3	pleckstrin homology domain containing, family G (with RhoGef domain) member 3
Mettl21a	1.09964	6.64264	0.0337111	0.383592	yes	Mettl21a	methyltransferase like 21A
Pgf	0.0530446	-6.50452	0.0337141	0.383592	yes	Pgf	placental growth factor
Rbp7	1.75366	5.84985	0.0337234	0.383592	yes	Rbp7	retinol binding protein 7, cellular
Selenbp1	5.26562	2.7768	0.0337457	0.383592	yes	Selenbp1	selenium binding protein 1
Gm6293	7.76601	1.91795	0.0337634	0.383592	yes	Gm6293	predicted pseudogene 6293
Gm51746	0.0922471	6.94325	0.0337635	0.383592	yes	Gm51746	predicted gene, 51746
Gm35761	1.10428	6.63635	0.0337683	0.383592	yes	Gm35761	predicted gene, 35761
Stard10	7.82241	1.90543	0.0338201	0.38385	yes	Stard10	START domain containing 10
Nr6a1os	2.70772	4.87341	0.0338429	0.38385	yes	Nr6a1os	nuclear receptor subfamily 6, group A, member 1, opposite strand
Fkbp2	4.94442	2.96373	0.0338434	0.38385	yes	Fkbp2	FK506 binding protein 2
Lcat	0.604808	-6.33772	0.0339211	0.383953	yes	Lcat	lecithin cholesterol acyltransferase
Igkv4-51	-0.794193	7.29609	0.0339483	0.383953	yes	Igkv4-51	immunoglobulin kappa chain variable 4-51
Cachd1	1.63199	6.43384	0.0339573	0.383953	yes	Cachd1	cache domain containing 1
Acot9	0.491321	6.80832	0.0339654	0.383953	yes	Acot9	acyl-CoA thioesterase 9
Serpina3g	1.73381	6.39981	0.0339813	0.383953	yes	Serpina3g	serine (or cysteine) peptidase inhibitor, clade A, member 3G
Glycam1	1.04689	6.64692	0.0340164	0.383953	yes	Glycam1	glycosylation dependent cell adhesion molecule 1
1810063I02Rik	-0.311833	7.03533	0.0340323	0.383953	yes	1810063I02Rik	RIKEN cDNA 1810063I02 gene
Akap11	3.55508	4.02667	0.0340338	0.383953	yes	Akap11	A kinase (PRKA) anchor protein 11
Gm35229	0.130595	6.91057	0.0340347	0.383953	yes	Gm35229	predicted gene, 35229
Gm36672	-1.10036	-6.99069	0.0340576	0.383953	yes	Gm36672	predicted gene, 36672
Gm51018	1.50614	-5.76142	0.0340746	0.383953	yes	Gm51018	predicted gene, 51018
Fam43a	-0.0673649	6.97129	0.034083	0.383953	yes	Fam43a	family with sequence similarity 43, member A
Vps35	0.556223	6.79334	0.0340942	0.383953	yes	Vps35	VPS35 retromer complex component
Gng11	2.89198	5.8265	0.0340973	0.383953	yes	Gng11	guanine nucleotide binding protein (G protein), gamma 11
Tsen2	0.734887	6.74479	0.0341271	0.384091	yes	Tsen2	tRNA splicing endonuclease subunit 2
mt-Rnr2	18.3888	-2.43696	0.0341561	0.384091	yes	mt-Rnr2	16S ribosomal RNA
E030030I06Rik	0.494574	6.7998	0.0341942	0.384091	yes	E030030I06Rik	RIKEN cDNA E030030I06 gene
Car11	0.202451	6.87491	0.0342239	0.384091	yes	Car11	carbonic anhydrase 11
Cldnd1	1.50583	6.47154	0.0342489	0.384091	yes	Cldnd1	claudin domain containing 1
4930579K19Rik	0.136477	6.89471	0.0342615	0.384091	yes	4930579K19Rik	RIKEN cDNA 4930579K19 gene
Nrg4	0.652087	6.77009	0.0342655	0.384091	yes	Nrg4	neuregulin 4
Zmynd10	-0.576122	7.18073	0.0342744	0.384091	yes	Zmynd10	zinc finger, MYND domain containing 10
Zfp14	0.655424	6.77278	0.0343062	0.384091	yes	Zfp14	zinc finger protein 14
Ago4	0.557517	6.79764	0.0343154	0.384091	yes	Ago4	argonaute RISC catalytic subunit 4
Gm39401	1.44069	6.5017	0.0343266	0.384091	yes	Gm39401	predicted gene, 39401
Nif3l1	1.51835	6.46212	0.0343506	0.384091	yes	Nif3l1	Ngg1 interacting factor 3-like 1 (S. pombe)
Igkc	5.03615	-4.95043	0.0343512	0.384091	yes	Igkc	immunoglobulin kappa constant
Gm39606	0.40667	6.80908	0.0343555	0.384091	yes	Gm39606	predicted gene, 39606
Gm29762	0.600712	6.77712	0.0343719	0.384091	yes	Gm29762	predicted gene, 29762
Gm33106	0.665446	6.76308	0.0344224	0.38446	yes	Gm33106	predicted gene, 33106
Gm35219	-0.448061	7.07642	0.0345284	0.385445	yes	Gm35219	predicted gene, 35219
Zfp324	0.206451	6.85775	0.0345457	0.385445	yes	Zfp324	zinc finger protein 324
Gapdh	9.39448	1.62515	0.0346357	0.385463	yes	Gapdh	glyceraldehyde-3-phosphate dehydrogenase
Ado	1.05311	6.61106	0.0346674	0.385463	yes	Ado	2-aminoethanethiol (cysteamine) dioxygenase
Nfia	2.47152	5.32629	0.0346873	0.385463	yes	Nfia	nuclear factor I/A
2810001G20Rik	0.363311	6.80169	0.0347016	0.385463	yes	2810001G20Rik	RIKEN cDNA 2810001G20 gene
Col16a1	1.23011	6.56632	0.0347034	0.385463	yes	Col16a1	collagen, type XVI, alpha 1
Gm9909	1.28667	6.55146	0.034713	0.385463	yes	Gm9909	predicted gene 9909
Map3k20	2.16033	6.17816	0.0347216	0.385463	yes	Map3k20	mitogen-activated protein kinase kinase kinase 20
Glis2	0.381181	6.79667	0.0347297	0.385463	yes	Glis2	GLIS family zinc finger 2
Mrpl3	1.4669	6.47154	0.0347447	0.385463	yes	Mrpl3	mitochondrial ribosomal protein L3
Kpna4	0.0183139	6.9209	0.034747	0.385463	yes	Kpna4	karyopherin (importin) alpha 4
Mapk8	1.12747	-6.12539	0.034815	0.385463	yes	Mapk8	mitogen-activated protein kinase 8
Gm11517	9.70483	1.57741	0.034821	0.385463	yes	Gm11517	predicted gene 11517
Tfb1m	1.29839	6.54054	0.0348446	0.385463	yes	Tfb1m	transcription factor B1, mitochondrial
Gm31598	0.52727	6.76053	0.0348739	0.385463	yes	Gm31598	predicted gene, 31598
Tigd5	0.213415	6.83074	0.0349054	0.385463	yes	Tigd5	tigger transposable element derived 5
Hacd1	1.54829	6.42728	0.0349472	0.385463	yes	Hacd1	3-hydroxyacyl-CoA dehydratase 1
Gm36279	0.587869	-6.29908	0.0349542	0.385463	yes	Gm36279	predicted gene, 36279
Cd83	-0.430368	7.04207	0.0349584	0.385463	yes	Cd83	CD83 antigen
Mapre1	5.23866	-2.76536	0.0349592	0.385463	yes	Mapre1	microtubule-associated protein, RP/EB family, member 1
H2ac6	-0.591382	7.16138	0.0349749	0.385463	yes	H2ac6	H2A clustered histone 6
Crabp1	-0.322268	6.98453	0.0349758	0.385463	yes	Crabp1	cellular retinoic acid binding protein I
2700049A03Rik	0.807542	6.67158	0.0349823	0.385463	yes	2700049A03Rik	RIKEN cDNA 2700049A03 gene
Mrps2	0.456777	6.76561	0.0349949	0.385463	yes	Mrps2	mitochondrial ribosomal protein S2
Bcl6b	0.785701	6.36402	0.0350409	0.385463	yes	Bcl6b	B cell CLL/lymphoma 6, member B
Uqcrb	1.0165	6.598	0.0350592	0.385463	yes	Uqcrb	ubiquinol-cytochrome c reductase binding protein
Gm31966	-0.155102	6.93416	0.0350593	0.385463	yes	Gm31966	predicted gene, 31966
Sncg	0.987608	6.6063	0.0350596	0.385463	yes	Sncg	synuclein, gamma
Crebzf	1.18726	6.55359	0.0350779	0.385463	yes	Crebzf	CREB/ATF bZIP transcription factor
Slc5a8	-0.381966	7.00527	0.0350844	0.385463	yes	Slc5a8	solute carrier family 5 (iodide transporter), member 8
Rnf135	-0.142602	6.92263	0.0351377	0.385463	yes	Rnf135	ring finger protein 135
[truncated: 681 more rows]
