# Supplementary material for: Deciphering Microbiome, Transcriptome, and Metabolic Interactions in the Presence of Probiotic Lactobacillus acidophilus against Salmonella Typhimurium in a Murine Model
Source: Antibiotics (Basel). 2024 Apr 11;13(4):352. doi: 10.3390/antibiotics13040352 (PMC11047355; doi:10.3390/antibiotics13040352)
Supplement: Supplementary file 1 [file antibiotics-13-00352-s001.zip › Table Supplementary S6..xlsx]

## Sheet: LAST VS CPG.(BP)
Table S6. Significantly Enriched upregulated and downregulated GO (BP) terms in LAST versus CPG group
ID	Description	GeneRatio	BgRatio	pvalue	geneID
GO:0019637	organophosphate metabolic process	122/1687	749/17970	7.76e-10	Adcy6/Elovl6/Mtch2/Agpat4/Pgam1/Smpd3/Uck2/Nme6/Inpp5j/Acp6/Acot7/Pgap3/Pdhx/Hycc2/Ampd2/Hk1/Lpcat3/Impa1/Gm29667/Pgap2/Pigv/Mpc1/Abca2/Gnpat/Entpd4/Ppip5k1/Fdps/Acadsb/Kmo/Eno1b/Pik3cg/Dnajc30/Pank1/Mboat2/Gucy1a1/Nmnat3/Dolk/Dgkq/Pyurf/Nudt7/Gtpbp1/Plpp5/Ep300/Plppr1/Entpd4b/Fgfr3/Prkn/Mocs2/Slc27a1/Itpa/Pigg/Pigl/Pank4/Mtmr7/COX2/Nos1/Prpsap1/H6pd/Pde8b/Pdxp/4833422C13Rik/Nt5e/G6pc3/Pla2g5/Gm6…
GO:0009117	nucleotide metabolic process	73/1687	391/17970	8e-09	Adcy6/Elovl6/Mtch2/Agpat4/Pgam1/Uck2/Nme6/Acot7/Pdhx/Ampd2/Hk1/Gm29667/Mpc1/Entpd4/Acadsb/Kmo/Eno1b/Dnajc30/Pank1/Gucy1a1/Nmnat3/Nudt7/Gtpbp1/Ep300/Entpd4b/Prkn/Itpa/Pank4/COX2/Nos1/Prpsap1/Pde8b/4833422C13Rik/Nt5e/Gm6581/Atp5d/Ehhadh/Tigar/Elovl5/Gm5867/Eno4/Acot4/Kynu/Nme7/Adss/Ampd3/Dctd/Ldhd/Epha2/Adpgk/Atp5b/Nmrk1/Entpd1/Hkdc1/Gm31597/Adcy4/Dck/Ada/Gpd1/Acot9/Gapdh/Adcy1/Hmgcr/Lclat1/Gm12070…
GO:0006753	nucleoside phosphate metabolic process	74/1687	399/17970	8.49e-09	Adcy6/Elovl6/Mtch2/Agpat4/Pgam1/Uck2/Nme6/Acot7/Pdhx/Ampd2/Hk1/Gm29667/Mpc1/Entpd4/Acadsb/Kmo/Eno1b/Dnajc30/Pank1/Gucy1a1/Nmnat3/Nudt7/Gtpbp1/Ep300/Entpd4b/Prkn/Itpa/Pank4/COX2/Nos1/Prpsap1/Pde8b/4833422C13Rik/Nt5e/Gm6581/Atp5d/Ehhadh/Tigar/Elovl5/Gm5867/Eno4/Acot4/Kynu/Nme7/Adss/Ampd3/Dctd/Ldhd/Epha2/Adpgk/Atp5b/Nmrk1/Entpd1/Hkdc1/Gm31597/Adcy4/Dck/Ada/Gpd1/Acot9/Gapdh/Adcy1/Smpdl3a/Hmgcr/Lclat1…
GO:0055086	nucleobase-containing small molecule metabolic process	78/1687	453/17970	9.37e-08	Adcy6/Elovl6/Mtch2/Agpat4/Pgam1/Nudt1/Uck2/Nme6/Acot7/Pdhx/Ampd2/Macrod1/Hk1/Gm29667/Mpc1/Entpd4/Acadsb/Kmo/Eno1b/Dnajc30/Pank1/Gucy1a1/Nmnat3/Nudt7/Gtpbp1/Ep300/Entpd4b/Prkn/Itpa/Pank4/COX2/Nos1/Prpsap1/Pde8b/4833422C13Rik/Nt5e/Gm6581/Atp5d/Ehhadh/Tigar/Elovl5/Gm5867/Eno4/Acot4/Kynu/Nme7/Adss/Ampd3/Dctd/Upb1/Ldhd/Epha2/Adpgk/Atp5b/Nmrk1/Entpd1/Hkdc1/Gm31597/Adcy4/Pgm3/Dck/Ada/Gpd1/Acot9/Gapdh/Ad…
GO:0051186	cofactor metabolic process	63/1687	344/17970	1.73e-07	Elovl6/Cyp4f40/Duox2/Pcbd2/Gstm2/Acot7/Pdhx/Gstp1/Fpgs/Mpc1/Coq6/Enoph1/Ndor1/Zfp13/Pdss2/Acadsb/Kmo/Mgst1/Duoxa2/Pank1/Ggt6/Gstt3/Nmnat3/Cth/Nudt7/Gstm7/Vnn1/Gsr/Nat8/Mocs2/Noxa1/Gstp-ps/Pank4/COX2/Pdxp/Isca2/4833422C13Rik/Particl/Pcbd1/Ehhadh/Elovl5/Acot4/Kynu/Rsad1/Nqo2/Nmrk1/Txnrd3/Cyp4f18/Clybl/Cat/Nubpl/Slc23a2/Acot9/Chac2/Mgst2/Ptger4/Nfs1/Hmgcr/Acot2/Shmt1/Gphn/Nubp2/Gsta5
GO:0006163	purine nucleotide metabolic process	58/1687	312/17970	3.16e-07	Adcy6/Elovl6/Mtch2/Pgam1/Nme6/Acot7/Pdhx/Ampd2/Hk1/Gm29667/Mpc1/Entpd4/Acadsb/Eno1b/Dnajc30/Pank1/Gucy1a1/Nudt7/Gtpbp1/Ep300/Entpd4b/Prkn/Itpa/Pank4/COX2/Nos1/Pde8b/4833422C13Rik/Nt5e/Gm6581/Atp5d/Ehhadh/Tigar/Elovl5/Eno4/Acot4/Kynu/Nme7/Adss/Ampd3/Ldhd/Epha2/Adpgk/Atp5b/Entpd1/Hkdc1/Gm31597/Adcy4/Ada/Gpd1/Acot9/Gapdh/Adcy1/Hmgcr/Gm12070/Acot2/Nos3/Gm52783
GO:0009259	ribonucleotide metabolic process	58/1687	313/17970	3.53e-07	Adcy6/Elovl6/Mtch2/Pgam1/Uck2/Nme6/Acot7/Pdhx/Ampd2/Hk1/Gm29667/Mpc1/Entpd4/Acadsb/Eno1b/Dnajc30/Pank1/Gucy1a1/Nudt7/Gtpbp1/Ep300/Entpd4b/Prkn/Itpa/Pank4/COX2/Pde8b/4833422C13Rik/Nt5e/Gm6581/Atp5d/Ehhadh/Tigar/Elovl5/Eno4/Acot4/Kynu/Nme7/Adss/Ampd3/Ldhd/Epha2/Adpgk/Atp5b/Entpd1/Hkdc1/Gm31597/Adcy4/Ada/Gpd1/Acot9/Gapdh/Adcy1/Hmgcr/Gm12070/Acot2/Dhodh/Gm52783
GO:0009150	purine ribonucleotide metabolic process	56/1687	300/17970	4.37e-07	Adcy6/Elovl6/Mtch2/Pgam1/Nme6/Acot7/Pdhx/Ampd2/Hk1/Gm29667/Mpc1/Entpd4/Acadsb/Eno1b/Dnajc30/Pank1/Gucy1a1/Nudt7/Gtpbp1/Ep300/Entpd4b/Prkn/Itpa/Pank4/COX2/Pde8b/4833422C13Rik/Nt5e/Gm6581/Atp5d/Ehhadh/Tigar/Elovl5/Eno4/Acot4/Kynu/Nme7/Adss/Ampd3/Ldhd/Epha2/Adpgk/Atp5b/Entpd1/Hkdc1/Gm31597/Adcy4/Ada/Gpd1/Acot9/Gapdh/Adcy1/Hmgcr/Gm12070/Acot2/Gm52783
GO:0072521	purine-containing compound metabolic process	61/1687	339/17970	5.07e-07	Adcy6/Elovl6/Mtch2/Pgam1/Nudt1/Nme6/Acot7/Pdhx/Ampd2/Macrod1/Hk1/Gm29667/Mpc1/Entpd4/Acadsb/Eno1b/Dnajc30/Pank1/Gucy1a1/Nudt7/Gtpbp1/Ep300/Entpd4b/Prkn/Itpa/Pank4/COX2/Nos1/Pde8b/4833422C13Rik/Nt5e/Gm6581/Atp5d/Ehhadh/Tigar/Elovl5/Eno4/Acot4/Kynu/Nme7/Adss/Ampd3/Ldhd/Epha2/Adpgk/Atp5b/Entpd1/Hkdc1/Gm31597/Adcy4/Ada/Gpd1/Acot9/Gapdh/Adcy1/Hmgcr/Gm12070/Acot2/Nos3/Slc16a9/Gm52783
GO:0019693	ribose phosphate metabolic process	58/1687	320/17970	7.53e-07	Adcy6/Elovl6/Mtch2/Pgam1/Uck2/Nme6/Acot7/Pdhx/Ampd2/Hk1/Gm29667/Mpc1/Entpd4/Acadsb/Eno1b/Dnajc30/Pank1/Gucy1a1/Nudt7/Gtpbp1/Ep300/Entpd4b/Prkn/Itpa/Pank4/COX2/Pde8b/4833422C13Rik/Nt5e/Gm6581/Atp5d/Ehhadh/Tigar/Elovl5/Eno4/Acot4/Kynu/Nme7/Adss/Ampd3/Ldhd/Epha2/Adpgk/Atp5b/Entpd1/Hkdc1/Gm31597/Adcy4/Ada/Gpd1/Acot9/Gapdh/Adcy1/Hmgcr/Gm12070/Acot2/Dhodh/Gm52783
GO:1990138	neuron projection extension	28/1687	118/17970	3.3e-06	Wnt5a/Ctnnb1/Cyfip1/Aurka/Rims2/Lamb2/Raph1/Nrp2/Ep300/Prkn/Sema6c/Cpne9/Aatk/Draxin/Map3k13/Mapt/Reg1/Gm46764/Postn/Pak6/Wdr36/Slc23a2/Adnp/Sh3gl2/Dpysl2/Megf8/Zfyve27/Mecp2
GO:0090407	organophosphate biosynthetic process	64/1687	383/17970	3.72e-06	Adcy6/Elovl6/Agpat4/Uck2/Nme6/Acot7/Pgap3/Pdhx/Ampd2/Lpcat3/Pgap2/Pigv/Mpc1/Abca2/Gnpat/Ppip5k1/Fdps/Kmo/Pik3cg/Dnajc30/Pank1/Mboat2/Gucy1a1/Nmnat3/Dolk/Dgkq/Pyurf/Prkn/Mocs2/Slc27a1/Pigg/Pigl/Pank4/COX2/Nos1/Prpsap1/Pla2g5/Gm6581/Atp5d/Elovl5/Pld1/Gm5867/Kynu/Nme7/Adss/Ampd3/Nus1/Ldhd/Atp5b/Nmrk1/Entpd1/Adcy4/Ada/Lcat/Gper1/Adcy1/Lclat1/Dhodh/Alox15/Gucy1b1/Nos3/Gphn/Pla2g4c/Agpat5
GO:0009165	nucleotide biosynthetic process	39/1687	204/17970	1.33e-05	Adcy6/Elovl6/Agpat4/Uck2/Nme6/Acot7/Pdhx/Ampd2/Mpc1/Kmo/Dnajc30/Pank1/Gucy1a1/Nmnat3/Prkn/Pank4/COX2/Nos1/Prpsap1/Gm6581/Atp5d/Elovl5/Gm5867/Kynu/Nme7/Adss/Ampd3/Ldhd/Atp5b/Nmrk1/Entpd1/Adcy4/Ada/Adcy1/Lclat1/Dhodh/Gucy1b1/Nos3/Agpat5
GO:1901135	carbohydrate derivative metabolic process	113/1687	820/17970	1.83e-05	Adcy6/Elovl6/Mtch2/Pgam1/Nudt1/Smpd3/Uck2/Edem1/Nme6/Acp6/Acot7/Pgap3/Pdhx/Galnt1/Ampd2/Ctnnb1/Pomt2/Macrod1/Hk1/Mgat5/Gm29667/Pgap2/Pigv/Mpc1/Abca2/Entpd4/Acadsb/Aldh1a1/St3gal2/B4galt2/Eno1b/Dcn/Dnajc30/Pank1/Gucy1a1/Itih5/Pyurf/Pomt1/Nudt7/Pawr/Gtpbp1/Lcmt2/Ep300/Entpd4b/Gbgt1/Spock2/Prkn/Itpa/Pigg/Pigl/St6galnac3/Pglyrp1/Pank4/COX2/H6pd/Pde8b/Alg1/4833422C13Rik/Galnt11/Nt5e/G6pc3/Gm6581/Atp5d…
GO:1901293	nucleoside phosphate biosynthetic process	39/1687	207/17970	1.89e-05	Adcy6/Elovl6/Agpat4/Uck2/Nme6/Acot7/Pdhx/Ampd2/Mpc1/Kmo/Dnajc30/Pank1/Gucy1a1/Nmnat3/Prkn/Pank4/COX2/Nos1/Prpsap1/Gm6581/Atp5d/Elovl5/Gm5867/Kynu/Nme7/Adss/Ampd3/Ldhd/Atp5b/Nmrk1/Entpd1/Adcy4/Ada/Adcy1/Lclat1/Dhodh/Gucy1b1/Nos3/Agpat5
GO:0044282	small molecule catabolic process	60/1687	370/17970	1.89e-05	Cpt2/Nudt1/Cyp4f40/Prodh/Arg2/Sord/Impa1/Tysnd1/Echdc1/Entpd4/Acadsb/Kmo/Eno1b/Lonp2/Gm46829/Nudt7/Hpgd/Ddah1/Entpd4b/Gm31349/Hadhb/Gm9199/Il11ra2/Gm36787/Nos1/Pdxp/Gm54336/Cpt1a/Hal/Aldh5a1/Ehhadh/Gls2/Gm16702/Tigar/Acot4/Mtmr2/Kynu/Gm36375/Gm41608/Nqo2/Upb1/Ldhd/Sesn2/Cyp4f18/Ada/Gm36279/Crabp1/Ddah2/Kyat3/Lpin1/Glb1/Gm42245/Dhdh/Acot2/Rbks/Cyp46a1/Otc/Gm32342/Nos3/Gm41450
GO:0055123	digestive system development	25/1687	110/17970	2.4e-05	Pdx1/Wnt5a/Kcnq1/Ctnnb1/Dab1/Tbx2/Fgf9/Bmp4/Myocd/Pitx2/Yipf6/Cdkn1c/Ephb3/Gip/Stra6/Tigar/Hnf1b/Reg1/Wdpcp/Dnaaf1/Lgr4/Ada/Otc/Megf8/Cbfa2t2
GO:0060560	developmental growth involved in morphogenesis	33/1687	166/17970	2.63e-05	Wnt5a/Ctnnb1/Cyfip1/Aurka/Rims2/Tbx2/Bmp4/Lamb2/Raph1/Nrp2/Spry2/Ep300/Prkn/Sema6c/Cpne9/Fstl4/Aatk/Draxin/Map3k13/Hnf1b/Mapt/Reg1/Gm46764/Postn/Pak6/Wdr36/Slc23a2/Adnp/Sh3gl2/Dpysl2/Megf8/Zfyve27/Mecp2
GO:0008033	tRNA processing	23/1687	102/17970	5.71e-05	Ctu1/Tyw3/Lcmt2/Tsen15/Trp53rka/Mtfmt/Mto1/Trmt12/Pus1/Kti12/Tyw1/Trmt9b/Aars2/Pus10/Trnt1/Tsen2/Gm36279/Adat3/Nsun4/Elp1/Bcdin3d/Trmt6/Trdmt1
GO:0006400	tRNA modification	17/1687	64/17970	6e-05	Ctu1/Lcmt2/Mtfmt/Mto1/Trmt12/Pus1/Kti12/Tyw1/Trmt9b/Aars2/Pus10/Gm36279/Nsun4/Elp1/Bcdin3d/Trmt6/Trdmt1
GO:0006732	coenzyme metabolic process	35/1687	188/17970	6.38e-05	Elovl6/Cyp4f40/Pcbd2/Acot7/Pdhx/Fpgs/Mpc1/Coq6/Enoph1/Pdss2/Acadsb/Kmo/Pank1/Nmnat3/Nudt7/Vnn1/Mocs2/Pank4/Pdxp/4833422C13Rik/Particl/Pcbd1/Ehhadh/Elovl5/Acot4/Kynu/Nqo2/Nmrk1/Cyp4f18/Slc23a2/Acot9/Hmgcr/Acot2/Shmt1/Gphn
GO:0006119	oxidative phosphorylation	23/1687	103/17970	6.7e-05	Mtch2/Cox7a1/Coa6/Dnajc30/Chchd10/Uqcrc1/Cox6a1/Ino80dos/COX2/Ndufs6b/Uqcrq/Ndufb9/Atp5d/Atp5b/Ndufv3/Cox8b/Slc25a33/Gm6293/Uqcrb/Cox4i1/Gm34303/Cox5b/COX1
GO:0034660	ncRNA metabolic process	59/1687	381/17970	8.54e-05	Ctu1/Zc3h12a/Zcchc4/Mrm2/Tut1/Tyw3/Riok2/Imp4/Rps24/Mrpl44/Exosc4/Wdr75/Gatc/Nol9/Lcmt2/Tsen15/Ep300/Chd7/Utp4/Trp53rka/Mtfmt/Nifk/Mto1/Dars2/Ints9/Isg20/Mphosph6/Trmt12/Pus1/Vars2/Kti12/Tyw1/Trmt9b/Aars2/Pus10/Ythdf2/Trnt1/Wdr36/Toe1/Tsen2/Tfb1m/Gm36279/Pwp1/Utp15/Adat3/Gm20156/LOC115488500/Farsb/Exosc3/Nsun4/Elp1/Pstk/Imp3/Bcdin3d/Trmt6/Exd1/Trdmt1/Ints7/Mecp2
GO:0048588	developmental cell growth	31/1687	161/17970	8.56e-05	Wnt5a/Ctnnb1/Cyfip1/Aurka/Rims2/Myocd/Lamb2/Fdps/Raph1/Nrp2/Ep300/Prkn/Sema6c/Cpne9/Fstl4/Aatk/Draxin/Map3k13/Mapt/Reg1/Gm46764/Postn/Pak6/Wdr36/Slc23a2/Adnp/Sh3gl2/Dpysl2/Megf8/Zfyve27/Mecp2
GO:0016049	cell growth	53/1687	332/17970	8.65e-05	Igfbp7/Nme6/Wnt5a/Ctnnb1/Ddx3x/Cyfip1/Bltp1/Aurka/Rims2/Myocd/Lamb2/Inhba/Fdps/Raph1/Exosc4/Cth/Nrp2/Ep300/Cdkn1b/Prkn/Sema6c/Smarca2/Cpne9/Csnk2a1-ps3/Fstl4/Wfdc1/Rbbp7/Bcl6/Aatk/Draxin/Gng4/Map3k13/Mapt/Reg1/Gm46764/Postn/Sesn2/Pak6/Wdr36/Grem1/Slc25a33/Slc23a2/Adam10/Adnp/Usp47/Ppp1r9b/Sh3gl2/Dpysl2/Megf8/Tgfbr1/Kazald1/Zfyve27/Mecp2
GO:0044283	small molecule biosynthetic process	74/1687	508/17970	9.02e-05	Elovl6/Smpd3/Pcbd2/Hacd2/Nme6/Acot7/Egr1/Mecr/Sord/Lpcat3/Impa1/Fpgs/Dkk3/Degs1/Coq6/Enoph1/Abca2/Entpd4/Ppip5k1/Pdss2/Fdps/Kmo/Aldh1a1/Nags/Dgkq/Cth/Nudt7/Lta4h/Ep300/Entpd4b/Dhcr7/Fads1/Itpa/Prmt3/H6pd/Pde8b/Pdxp/Gip/Fam3a/Nt5e/G6pc3/Per2/Pla2g5/Pcbd1/Gls2/Elovl5/Amacr/Pycr1/Erlin1/Kynu/Nme7/Edn2/Nus1/Upb1/Entpd1/Sesn2/Cbs/Ada/Gpd1/Hacd1/Gper1/Mgst2/Ptger4/Smpdl3a/Hmgcr/Asns/Otc/Alox15/Shmt1/En…
GO:0034470	ncRNA processing	50/1687	309/17970	9.6e-05	Ctu1/Zcchc4/Mrm2/Tut1/Tyw3/Riok2/Imp4/Rps24/Mrpl44/Exosc4/Wdr75/Nol9/Lcmt2/Tsen15/Chd7/Utp4/Trp53rka/Mtfmt/Nifk/Mto1/Ints9/Isg20/Mphosph6/Trmt12/Pus1/Kti12/Tyw1/Trmt9b/Aars2/Pus10/Ythdf2/Trnt1/Wdr36/Toe1/Tsen2/Tfb1m/Gm36279/Pwp1/Utp15/Adat3/Gm20156/Exosc3/Nsun4/Elp1/Imp3/Bcdin3d/Trmt6/Trdmt1/Ints7/Mecp2
GO:0051188	cofactor biosynthetic process	31/1687	163/17970	0.000108615	Elovl6/Duox2/Pcbd2/Acot7/Pdhx/Fpgs/Mpc1/Coq6/Ndor1/Zfp13/Pdss2/Kmo/Duoxa2/Pank1/Ggt6/Nmnat3/Mocs2/Pank4/COX2/Isca2/Particl/Pcbd1/Elovl5/Kynu/Rsad1/Nmrk1/Nubpl/Mgst2/Nfs1/Gphn/Nubp2
GO:0060688	regulation of morphogenesis of a branching structure	12/1687	38/17970	0.000119909	Wnt5a/Ctnnb1/Bmp4/Fkbpl/Map3k13/Sox8/Hnf1b/Lgr4/Grem1/Pgf/Btbd7/Mecp2
GO:0006399	tRNA metabolic process	29/1687	150/17970	0.000132402	Ctu1/Tyw3/Gatc/Lcmt2/Tsen15/Trp53rka/Mtfmt/Mto1/Dars2/Trmt12/Pus1/Vars2/Kti12/Tyw1/Trmt9b/Aars2/Pus10/Trnt1/Tsen2/Gm36279/Adat3/LOC115488500/Farsb/Nsun4/Elp1/Pstk/Bcdin3d/Trmt6/Trdmt1
GO:0046034	ATP metabolic process	39/1687	226/17970	0.000139475	Mtch2/Pgam1/Cox7a1/Coa6/Hk1/Gm29667/Eno1b/Dnajc30/Chchd10/Uqcrc1/Cox6a1/Ep300/Ino80dos/Prkn/COX2/Ndufs6b/Uqcrq/Ndufb9/Gm6581/Atp5d/Tigar/Eno4/Ldhd/Adpgk/Atp5b/Entpd1/Hkdc1/Ndufv3/Cox8b/Slc25a33/Gpd1/Gm6293/Gapdh/Uqcrb/Cox4i1/Gm12070/Gm34303/Cox5b/COX1
GO:0048565	digestive tract development	22/1687	101/17970	0.000140984	Pdx1/Wnt5a/Kcnq1/Ctnnb1/Dab1/Tbx2/Fgf9/Bmp4/Myocd/Pitx2/Yipf6/Ephb3/Stra6/Tigar/Hnf1b/Reg1/Dnaaf1/Lgr4/Ada/Otc/Megf8/Cbfa2t2
GO:0001568	blood vessel development	73/1687	510/17970	0.000173853	Parva/Rnf213/Fgf1/Wnt5a/Tab1/Egr1/Ctnnb1/Mmp2/Zc3h12a/Tbx2/Fgf9/Bmp4/Myocd/Fkbpl/Ccn1/Adm/Dcn/Pik3cg/Nrarp/Luzp1/Lama1/Ltbp1/Casp8/Map3k7/Adgra2/Adgrg1/Nrp2/Spry2/Hoxb3/Ccdc134/Hpgd/Chd7/Hspb6/Pitx2/Ddah1/Rin2/Plcd3/Nr4a1/Dhcr7/Col15a1/Smoc2/Ephb3/Sec24b/Il18/Stra6/Nus1/Epha2/Atp5b/Gm2788/Cdh13/Ubp1/Col8a1/Cul7/Grem1/Erap1/Pgf/Calcrl/Gper1/Ptger4/Gja4/Foxc1/Col8a2/Pik3r6/C6/Spred1/Megf8/Tgfbr1/Tg…
GO:0006525	arginine metabolic process	8/1687	19/17970	0.000173966	Arg2/Nags/Ddah1/Agmat/Nos1/Ddah2/Otc/Nos3
GO:0033043	regulation of organelle organization	118/1687	911/17970	0.000177838	Tmsb4x/Phf8/Smpd3/Nme6/Wnt5a/Ctc1/Ctnnb1/Cyfip1/Aurka/Tmod3/Ppm1f/Slain2/Bmp4/Myocd/Mad1l1/Tac1/Zfp13/Riok2/Rangrf/Eno1b/Dcn/Cd2ap/Chchd10/Sh3bp1/Eps8/Birc5/Rnf4/Cep135/Mid1/Nes/Ep300/Zwint/Cdkn1b/Prkn/Wapl/Ppp1r9a/Cep295/Morc2a/Cdkn1c/Sptbn2/Sipa1l1/Gm33950/Nos1/Gm52861/Pdxp/Lrfn4/Irgm2/Adck1/Myo19/Sh3pxd2b/Arhgap6/Bcl6/Spast/Togaram1/Tmem106b/Sec24b/Bnip3l-ps/Lrrc4b/Ddx11/Tigar/Terf1/Mtf2/Cct4/…
GO:0048514	blood vessel morphogenesis	65/1687	444/17970	0.000204577	Parva/Rnf213/Fgf1/Wnt5a/Ctnnb1/Mmp2/Zc3h12a/Tbx2/Fgf9/Bmp4/Myocd/Fkbpl/Ccn1/Adm/Dcn/Pik3cg/Nrarp/Lama1/Casp8/Map3k7/Adgra2/Adgrg1/Nrp2/Spry2/Hoxb3/Ccdc134/Hpgd/Chd7/Hspb6/Pitx2/Ddah1/Rin2/Plcd3/Nr4a1/Col15a1/Smoc2/Ephb3/Sec24b/Il18/Stra6/Nus1/Epha2/Atp5b/Gm2788/Cdh13/Ubp1/Col8a1/Cul7/Grem1/Erap1/Pgf/Calcrl/Ptger4/Foxc1/Col8a2/Pik3r6/C6/Spred1/Tgfbr1/Tgfa/Tbxa2r/Nos3/Gpr4/Mecp2/Egr3
GO:0001944	vasculature development	75/1687	532/17970	0.000229316	Parva/Rnf213/Fgf1/Wnt5a/Tab1/Egr1/Ctnnb1/Mmp2/Zc3h12a/Tbx2/Fgf9/Bmp4/Myocd/Fkbpl/Ccn1/Adm/Dcn/Pik3cg/Nrarp/Luzp1/Lama1/Ltbp1/Casp8/Cth/Map3k7/Adgra2/Adgrg1/Nrp2/Spry2/Hoxb3/Ccdc134/Hpgd/Chd7/Hspb6/Pitx2/Ddah1/Rin2/Plcd3/Nr4a1/Dhcr7/Col15a1/Smoc2/Ephb3/Sec24b/Il18/Stra6/Nus1/Epha2/Atp5b/Gm2788/Cdh13/Ubp1/Col8a1/Cul7/Grem1/Erap1/Adam10/Pgf/Calcrl/Gper1/Ptger4/Gja4/Foxc1/Col8a2/Pik3r6/C6/Spred1/Megf…
GO:0072358	cardiovascular system development	75/1687	532/17970	0.000229316	Parva/Rnf213/Fgf1/Wnt5a/Tab1/Egr1/Ctnnb1/Mmp2/Zc3h12a/Tbx2/Fgf9/Bmp4/Myocd/Fkbpl/Ccn1/Adm/Dcn/Pik3cg/Nrarp/Luzp1/Lama1/Ltbp1/Casp8/Cth/Map3k7/Adgra2/Adgrg1/Nrp2/Spry2/Hoxb3/Ccdc134/Hpgd/Chd7/Hspb6/Pitx2/Ddah1/Rin2/Plcd3/Nr4a1/Dhcr7/Col15a1/Smoc2/Ephb3/Sec24b/Il18/Stra6/Nus1/Epha2/Atp5b/Gm2788/Cdh13/Ubp1/Col8a1/Cul7/Grem1/Erap1/Adam10/Pgf/Calcrl/Gper1/Ptger4/Gja4/Foxc1/Col8a2/Pik3r6/C6/Spred1/Megf…
GO:0051145	smooth muscle cell differentiation	13/1687	47/17970	0.000280492	Tmsb4x/Itga8/Ctnnb1/Tbx2/Fgf9/Bmp4/Myocd/Adm/Cth/Pitx2/Gper1/Mecp2/Zeb1
GO:1903827	regulation of cellular protein localization	51/1687	333/17970	0.00032752	Edem1/Wnt5a/Ctnnb1/Lrp4/Zc3h12a/Wipf1/Stx6/Ppm1f/Bmp4/Kcnb1/Riok2/Rangrf/Cd2ap/Ppp2ca/Slc5a3/Ep300/Pcm1/Prkn/Wapl/Meak7/Csnk2a1-ps3/Sapcd2/Bnip3l-ps/Tmem30b/Terf1/Cct4/Gm32340/Gas8/Mapt/Epha2/Mief1/Mavs/Ccne2/Tmem98/Sesn2/Ophn1/Ctdspl2/Ttbk2/Nptn/Adam10/Glis2/Edem2/Gper1/Rapgef4/Abhd17b/Prr5l/2700099C18Rik/Ppp1r9b/Hspa1l/Dnaja1/Cep290
GO:0022900	electron transport chain	20/1687	93/17970	0.00033278	Mtch2/Cox7a1/Coa6/Ndor1/Sdha/Uqcrc1/Ino80dos/COX2/Ndufs6b/Uqcrq/Ndufb9/Wdr93/Etfrf1/Ndufv3/Cox8b/Gpd1/Gm6293/Uqcrb/Cox4i1/Cox5b
GO:0061669	spontaneous neurotransmitter secretion	4/1687	5/17970	0.000358102	Rims2/Prkn/Ppp1r9a/Unc13b
GO:0006937	regulation of muscle contraction	22/1687	108/17970	0.000386252	Kcnq1/Arg2/Zc3h12a/Myocd/Rangrf/Gucy1a1/Pawr/Hspb6/Nr4a1/Pkp2/Arhgap42/Edn2/Kcne3/Ada/Calcrl/Gper1/Ptger4/Tnnt3/Tnni2/Dsp/Tbxa2r/Tnni1
GO:0000266	mitochondrial fission	9/1687	26/17970	0.000394599	Mtch2/Mtfp1/Aurka/Dcn/Prkn/Myo19/Mapt/Mief1/Dnm1l
GO:0035295	tube development	103/1687	793/17970	0.000409993	Parva/Rnf213/Smpd3/Fgf1/Pdx1/Wnt5a/Tab1/Kcnq1/Ctnnb1/Dab1/Arg2/Mmp2/Zc3h12a/Crispld2/Tbx2/Fgf9/Bmp4/Myocd/Fkbpl/Ccn1/Adm/Dcn/Pik3cg/Nrarp/Luzp1/Lama1/Atoh8/Gjb1/Casp8/Map3k7/Adgra2/Adgrg1/Nrp2/Spry2/Hoxb3/Rec8/Ccdc134/Ep300/Hpgd/Chd7/Hspb6/Pitx2/Ddah1/Rin2/Plcd3/Elk1/Nr4a1/Dhcr7/Yipf6/Col15a1/Smoc2/Wnt9b/Ephb3/Gorab/Sec24b/Il18/Smad9/Stra6/Tigar/Sox8/Hnf1b/Snora73b/Mgp/Edn2/Nus1/Reg1/Epha2/Atp5b/…
GO:0001525	angiogenesis	55/1687	371/17970	0.000446803	Parva/Rnf213/Fgf1/Wnt5a/Ctnnb1/Mmp2/Zc3h12a/Fgf9/Bmp4/Fkbpl/Ccn1/Adm/Dcn/Pik3cg/Nrarp/Casp8/Map3k7/Adgra2/Adgrg1/Nrp2/Spry2/Hoxb3/Ccdc134/Hspb6/Pitx2/Ddah1/Plcd3/Nr4a1/Col15a1/Smoc2/Ephb3/Il18/Nus1/Epha2/Atp5b/Gm2788/Cdh13/Ubp1/Col8a1/Grem1/Erap1/Pgf/Calcrl/Foxc1/Col8a2/Pik3r6/C6/Spred1/Tgfbr1/Tgfa/Tbxa2r/Nos3/Gpr4/Mecp2/Egr3
GO:0009057	macromolecule catabolic process	116/1687	916/17970	0.000484945	Rnf213/Fbxo31/Gaa/Hspa5/Edem1/Wnt5a/Rnf128/Rnf34/Ctnnb1/Pomt2/Zc3h12a/Aurka/Dnajc10/Ubr3/Cul4a/Lypla1/Dda1/Abca2/Usp1/Psma4/Cd2ap/Ppp2ca/Rmnd5a/Dhx34/Skic3/Lonp2/Rnf4/Bmal1/Gm9836/Exosc4/Casp8/Dtl/Gtpbp1/Caml/Usp15/Usp43/Cdkn1b/Trim72/Psmd6/Prkn/Dcps/Zfp36l2/Ntan1/Pglyrp1/Peli1/Csnk2a1-ps3/Ppp1cb/Isg20/Fbxo33/Patl1/Tmem106b/Serpinb1a/Uchl5/Bnip3l-ps/Ppp1r3d/Usp22/Cul1/Erlin1/Mtmr2/Wac/Uchl1/Exosc…
GO:0072522	purine-containing compound biosynthetic process	28/1687	154/17970	0.000491587	Adcy6/Elovl6/Nme6/Acot7/Pdhx/Ampd2/Mpc1/Dnajc30/Pank1/Gucy1a1/Prkn/Pank4/COX2/Nos1/Nt5e/Gm6581/Atp5d/Elovl5/Nme7/Adss/Ampd3/Ldhd/Atp5b/Entpd1/Adcy4/Ada/Adcy1/Nos3
GO:0090263	positive regulation of canonical Wnt signaling pathway	16/1687	69/17970	0.000530306	Frat1/Ddx3x/Fgf9/Nrarp/Ror2/Dkk2/Bmal1/Adgra2/Zbed3/Tmem198b/Tnks/Lgr4/Rnf146/Atp6ap2/Usp47/Rspo1
GO:0001558	regulation of cell growth	45/1687	291/17970	0.000578606	Igfbp7/Nme6/Wnt5a/Ddx3x/Cyfip1/Bltp1/Rims2/Myocd/Inhba/Fdps/Exosc4/Cth/Ep300/Cdkn1b/Prkn/Sema6c/Smarca2/Cpne9/Csnk2a1-ps3/Fstl4/Wfdc1/Rbbp7/Bcl6/Aatk/Draxin/Gng4/Map3k13/Mapt/Reg1/Gm46764/Sesn2/Wdr36/Grem1/Slc25a33/Slc23a2/Adam10/Adnp/Usp47/Ppp1r9b/Dpysl2/Megf8/Tgfbr1/Kazald1/Zfyve27/Mecp2
GO:0006164	purine nucleotide biosynthetic process	27/1687	148/17970	0.000581515	Adcy6/Elovl6/Nme6/Acot7/Pdhx/Ampd2/Mpc1/Dnajc30/Pank1/Gucy1a1/Prkn/Pank4/COX2/Nos1/Gm6581/Atp5d/Elovl5/Nme7/Adss/Ampd3/Ldhd/Atp5b/Entpd1/Adcy4/Ada/Adcy1/Nos3
GO:0043436	oxoacid metabolic process	121/1687	967/17970	0.000587258	Cpt2/Elovl6/Mtch2/Pgam1/Smpd3/Cyp4f40/Prodh/Hacd2/Acot7/Pdhx/Arg2/Mecr/Hk1/Fpgs/Gm29667/Tysnd1/Mpc1/Degs1/Echdc1/Enoph1/Lypla1/Gnpat/Bnip2/Acadsb/Kmo/Ddc/Aldh1a1/Eno1b/Dcn/Lonp2/Nags/Grhpr/Itih5/Cth/Gatc/Gm46829/Nudt7/Cyp2t4/Lta4h/Vnn1/Ep300/Hpgd/Ddah1/Gm31349/Spock2/Slc27a1/Agmat/Hadhb/Fads1/Gm9199/Prmt3/Gm36787/Dars2/Nos1/Ndufs6b/Uevld/Gm54336/Gip/Cpt1a/Hal/4833422C13Rik/Aldh5a1/Per2/Vars2/Pla2…
GO:0030177	positive regulation of Wnt signaling pathway	20/1687	97/17970	0.000592667	Wnt5a/Frat1/Ddx3x/Fgf9/Nrarp/Ror2/Dkk2/Bmal1/Adgra2/Zbed3/Tmem198b/Csnk2a1-ps3/Tnfaip3/Tnks/Lgr4/Rnf146/Atp6ap2/Usp47/Rspo1/Rspo3
GO:0019752	carboxylic acid metabolic process	117/1687	932/17970	0.000638404	Cpt2/Elovl6/Mtch2/Pgam1/Smpd3/Cyp4f40/Prodh/Hacd2/Acot7/Pdhx/Arg2/Mecr/Hk1/Fpgs/Gm29667/Tysnd1/Mpc1/Degs1/Echdc1/Enoph1/Lypla1/Gnpat/Acadsb/Kmo/Ddc/Aldh1a1/Eno1b/Lonp2/Nags/Grhpr/Itih5/Cth/Gatc/Gm46829/Nudt7/Cyp2t4/Lta4h/Vnn1/Ep300/Hpgd/Ddah1/Gm31349/Slc27a1/Agmat/Hadhb/Fads1/Gm9199/Prmt3/Gm36787/Dars2/Nos1/Ndufs6b/Uevld/Gm54336/Gip/Cpt1a/Hal/4833422C13Rik/Aldh5a1/Per2/Vars2/Pla2g5/Ehhadh/Gls2/Gm…
GO:0007063	regulation of sister chromatid cohesion	6/1687	13/17970	0.000651162	Ctnnb1/Wapl/Gm33950/Ddx11/Tnks/Sgo2a
GO:0090140	regulation of mitochondrial fission	6/1687	13/17970	0.000651162	Aurka/Dcn/Prkn/Myo19/Mapt/Mief1
GO:0009137	purine nucleoside diphosphate catabolic process	5/1687	9/17970	0.000661122	Entpd4/Entpd4b/Nt5e/Entpd1/Gm52783
GO:0009181	purine ribonucleoside diphosphate catabolic process	5/1687	9/17970	0.000661122	Entpd4/Entpd4b/Nt5e/Entpd1/Gm52783
GO:0072215	regulation of metanephros development	5/1687	9/17970	0.000661122	Egr1/Ctnnb1/Bmp4/Wnt9b/Hnf1b
GO:0044265	cellular macromolecule catabolic process	100/1687	777/17970	0.00067882	Rnf213/Fbxo31/Hspa5/Edem1/Rnf128/Rnf34/Ctnnb1/Pomt2/Zc3h12a/Aurka/Dnajc10/Ubr3/Cul4a/Dda1/Abca2/Usp1/Psma4/Cd2ap/Rmnd5a/Dhx34/Skic3/Lonp2/Rnf4/Bmal1/Gm9836/Exosc4/Casp8/Dtl/Gtpbp1/Caml/Usp15/Usp43/Trim72/Psmd6/Prkn/Dcps/Zfp36l2/Ntan1/Peli1/Csnk2a1-ps3/Isg20/Fbxo33/Patl1/Tmem106b/Uchl5/Bnip3l-ps/Usp22/Cul1/Erlin1/Wac/Uchl1/Exosc8/Wfs1/Mylip/Usp30/Ythdf2/Dcst1/Sh3rf2/Tnfaip3/Yme1l1/Marchf7/Styx/Klh…
GO:0006082	organic acid metabolic process	122/1687	981/17970	0.000706	Cpt2/Elovl6/Mtch2/Pgam1/Smpd3/Cyp4f40/Prodh/Hacd2/Acot7/Pdhx/Arg2/Mecr/Hk1/Fpgs/Gm29667/Tysnd1/Mpc1/Degs1/Echdc1/Enoph1/Lypla1/Gnpat/Bnip2/Acadsb/Kmo/Ddc/Aldh1a1/Eno1b/Dcn/Lonp2/Nags/Grhpr/Itih5/Cth/Gatc/Gm46829/Nudt7/Cyp2t4/Lta4h/Vnn1/Ep300/Hpgd/Ddah1/Gm31349/Spock2/Slc27a1/Agmat/Hadhb/Fads1/Gm9199/Prmt3/Gm36787/Dars2/Nos1/Ndufs6b/Uevld/Gm54336/Gip/Cpt1a/Hal/4833422C13Rik/Aldh5a1/Per2/Vars2/Pla2…
GO:0022603	regulation of anatomical structure morphogenesis	90/1687	690/17970	0.000813585	Ywhah/Parva/Fbxo31/Wnt5a/Cldn3/Ctnnb1/Dab1/Lrp4/Cyfip1/Zc3h12a/Wtip/Aurka/Rims2/Tbx2/Bmp4/Fkbpl/Zmym3/Adm/Dcn/Nrarp/Ror2/Ccl8/Adgra2/Spry2/Ep300/Hspb6/Jhy/Ddah1/Rin2/Prkn/Sema6c/Ppp1r9a/Arhgap15/Smoc2/Sipa1l1/Wnt9b/Amigo1/Cpne9/Larp4/Ephb3/Fstl4/Adck1/Myo19/Sapcd2/Aatk/Draxin/Sec24b/Il18/Map3k13/Sox8/Cd53/Hnf1b/Mapt/Reg1/Epha2/Mief1/Dock1/Gm46764/Tnfaip3/Wdpcp/Postn/Lgr4/Wdr36/Ss18l1/Cul7/Grem1/S…
GO:0019318	hexose metabolic process	33/1687	198/17970	0.000822726	Pdx1/Kcnq1/Hk1/Sord/Gm29667/Eno1b/Gm46840/Dgkq/Ep300/Prkn/Il11ra2/Galk2/H6pd/Ppp1cb/Cpt1a/Fam3a/G6pc3/Per2/Ppp1r3d/Tigar/Adpgk/Hkdc1/Sesn2/Pfkfb2/Gpd1/Gapdh/Gdpgp1/Pask/Glb1/Gm12070/Pfkfb3/Epm2aip1/Supt20
GO:0002280	monocyte activation involved in immune response	3/1687	3/17970	0.00082604	Dysf/Lman2l/Fer1l5
GO:0010312	detoxification of zinc ion	3/1687	3/17970	0.00082604	Slc30a10/Slc30a1/1700034H15Rik
GO:0071579	regulation of zinc ion transport	3/1687	3/17970	0.00082604	Slc30a10/Slc30a1/1700034H15Rik
GO:0072179	nephric duct formation	3/1687	3/17970	0.00082604	Bmp4/Wnt9b/Hnf1b
GO:1990359	stress response to zinc ion	3/1687	3/17970	0.00082604	Slc30a10/Slc30a1/1700034H15Rik
GO:0045927	positive regulation of growth	31/1687	183/17970	0.00088451	Ddx3x/Cyfip1/Rims2/Tbx2/Ppm1f/Fgf9/Fdps/Exosc4/Ep300/Chd7/Prkn/Cpne9/Csnk2a1-ps3/Sh3pxd2b/Map3k13/Mapt/Sgip1/Wfs1/Reg1/Slc25a33/Slc23a2/Adam10/Adnp/Ptger4/Usp47/Tfcp2l1/Megf8/Tgfbr1/Sash3/Zfyve27/Mecp2
GO:0009135	purine nucleoside diphosphate metabolic process	18/1687	86/17970	0.00090743	Mtch2/Pgam1/Hk1/Gm29667/Entpd4/Eno1b/Ep300/Entpd4b/Nt5e/Tigar/Eno4/Adpgk/Entpd1/Hkdc1/Gpd1/Gapdh/Gm12070/Gm52783
GO:0009179	purine ribonucleoside diphosphate metabolic process	18/1687	86/17970	0.00090743	Mtch2/Pgam1/Hk1/Gm29667/Entpd4/Eno1b/Ep300/Entpd4b/Nt5e/Tigar/Eno4/Adpgk/Entpd1/Hkdc1/Gpd1/Gapdh/Gm12070/Gm52783
GO:0051130	positive regulation of cellular component organization	104/1687	821/17970	0.000925883	Fbxo31/Smpd3/Hspa5/Wnt5a/Poldip2/Cldn3/Ctnnb1/Lrp4/Cyfip1/Aurka/Dynlt1c/Rims2/Ppm1f/Slain2/Gpihbp1/Bmp4/Cdh17/Tac1/Zfp13/Dcn/Chchd10/Ror2/Birc5/Ccl8/Cep135/Nes/Ep300/Cdkn1b/Prkn/Ppp1r9a/Cep295/Morc2a/Pcp4/Gm33950/Nos1/Amigo1/Cpne9/Ephb3/Pdxp/Irgm2/Adck1/Sh3pxd2b/Bcl6/Spast/Togaram1/Tmem106b/Atp10a/Vstm5/Map3k13/Lrrc4b/Ddx11/Terf1/Mtf2/Cct4/Limch1/Pde4dip/Jmjd4/Cd53/Mapt/Sgip1/Reg1/Epha2/Mief1/Abc…
GO:0016054	organic acid catabolic process	43/1687	281/17970	0.000940222	Cpt2/Cyp4f40/Prodh/Arg2/Tysnd1/Echdc1/Acadsb/Kmo/Lonp2/Gm46829/Nudt7/Hpgd/Ddah1/Gm31349/Hadhb/Gm9199/Gm36787/Nos1/Gm54336/Cpt1a/Hal/Aldh5a1/Ehhadh/Gls2/Gm16702/Acot4/Kynu/Gm36375/Gm41608/Ldhd/Sesn2/Cyp4f18/Gm36279/Crabp1/Ddah2/Kyat3/Lpin1/Gm42245/Acot2/Otc/Gm32342/Nos3/Gm41450
GO:0046395	carboxylic acid catabolic process	43/1687	281/17970	0.000940222	Cpt2/Cyp4f40/Prodh/Arg2/Tysnd1/Echdc1/Acadsb/Kmo/Lonp2/Gm46829/Nudt7/Hpgd/Ddah1/Gm31349/Hadhb/Gm9199/Gm36787/Nos1/Gm54336/Cpt1a/Hal/Aldh5a1/Ehhadh/Gls2/Gm16702/Acot4/Kynu/Gm36375/Gm41608/Ldhd/Sesn2/Cyp4f18/Gm36279/Crabp1/Ddah2/Kyat3/Lpin1/Gm42245/Acot2/Otc/Gm32342/Nos3/Gm41450
GO:0042773	ATP synthesis coupled electron transport	15/1687	66/17970	0.000977981	Mtch2/Cox7a1/Coa6/Uqcrc1/Ino80dos/COX2/Ndufs6b/Uqcrq/Ndufb9/Ndufv3/Cox8b/Gm6293/Uqcrb/Cox4i1/Cox5b
GO:0062012	regulation of small molecule metabolic process	41/1687	265/17970	0.000981104	Mtch2/Pgam1/Smpd3/Egr1/Cd320/Lpcat3/Tysnd1/Dkk3/Fdps/Dnajc30/Lonp2/Gm46840/Dgkq/Ep300/Hpgd/Prkn/Dhcr7/Prmt3/COX2/Nos1/H6pd/Gip/Ppp1cb/Cpt1a/Fam3a/Ppp1r3d/Tigar/Elovl5/Erlin1/Entpd1/Sesn2/Clybl/Gpd1/Nucb2/Gper1/Ptger4/Pask/Epm2aip1/Nos3/Star/Supt20
GO:0030856	regulation of epithelial cell differentiation	21/1687	108/17970	0.000981552	Nkx6-3/Ctnnb1/Eppk1/Bmp4/Atoh8/Bmal1/Spry2/Reg3a/Cdkn1b/Cdkn1c/Prlr/Wnt9b/Gm31597/Cul7/Akap11/Foxc1/Prkch/Spred1/Proc/Tgfbr1/Zeb1
GO:0042117	monocyte activation	4/1687	6/17970	0.000994063	Dysf/Lman2l/Adam10/Fer1l5
GO:0097070	ductus arteriosus closure	4/1687	6/17970	0.000994063	Myocd/Hpgd/Stra6/Ptger4
GO:0048675	axon extension	17/1687	80/17970	0.00104224	Wnt5a/Cyfip1/Lamb2/Raph1/Nrp2/Ep300/Sema6c/Aatk/Draxin/Map3k13/Mapt/Gm46764/Wdr36/Adnp/Dpysl2/Megf8/Zfyve27
GO:0051150	regulation of smooth muscle cell differentiation	8/1687	24/17970	0.00110481	Tmsb4x/Fgf9/Bmp4/Myocd/Cth/Gper1/Mecp2/Zeb1
GO:0010498	proteasomal protein catabolic process	46/1687	309/17970	0.00115086	Fbxo31/Hspa5/Edem1/Rnf34/Ctnnb1/Pomt2/Aurka/Dnajc10/Ubr3/Cul4a/Dda1/Cd2ap/Rmnd5a/Rnf4/Bmal1/Gm9836/Caml/Trim72/Psmd6/Prkn/Peli1/Fbxo33/Uchl5/Cul1/Erlin1/Wac/Wfs1/Sh3rf2/Marchf7/Styx/Klhl42/Ubqln2/Ophn1/Psme4/Fbxo38/Rad23a/Edem2/Sgtb/Fbxo45/F8a/Rnf103/Ubxn11/Ankzf1/Usp14/Psma5/Rnft1
GO:0006650	glycerophospholipid metabolic process	34/1687	210/17970	0.00116422	Agpat4/Inpp5j/Acp6/Pgap3/Hycc2/Lpcat3/Impa1/Pgap2/Pigv/Gnpat/Pik3cg/Mboat2/Dgkq/Pyurf/Slc27a1/Pigg/Pigl/Mtmr7/Pdxp/Pla2g5/Pld1/Mtmr2/Abca3/Pip4p2/Lcat/Lclat1/Sacm1l/Pik3r6/Fig4/Alox15/Serinc2/Pla2g4c/Mecp2/Agpat5
GO:0040008	regulation of growth	63/1687	456/17970	0.00117632	Igfbp7/Nme6/Wnt5a/Ddx3x/Cyfip1/Eppk1/Bltp1/Rims2/Tbx2/Ppm1f/Fgf9/Bmp4/Myocd/Inhba/Fdps/Exosc4/Cth/Igfbp2/Ep300/Chd7/Cdkn1b/Prkn/Adrb3/Sema6c/Smarca2/Cpne9/Csnk2a1-ps3/Fstl4/Wfdc1/Rbbp7/Sh3pxd2b/Bcl6/Aatk/Draxin/Gng4/Map3k13/Hnf1b/Mapt/Sgip1/Wfs1/Reg1/Gm46764/Sesn2/Wdr36/Grem1/Tgfbr2/Slc25a33/Slc23a2/Adam10/Adnp/Ptger4/Usp47/Foxc1/Ppp1r9b/Tfcp2l1/Dpysl2/Megf8/Dusp6/Tgfbr1/Sash3/Kazald1/Zfyve27/Mec…
GO:0140053	mitochondrial gene expression	18/1687	88/17970	0.00120126	Rmnd1/Mrps34/Gfm2/Malsu1/Mrpl47/Chchd10/Mrpl16/Mrpl44/Gatc/Tefm/Aars2/Mief1/Trnt1/Slc25a33/Tfb1m/Mrps2/LOC115488500/Nsun4
GO:0006527	arginine catabolic process	5/1687	10/17970	0.00122008	Arg2/Ddah1/Nos1/Ddah2/Nos3
GO:0060231	mesenchymal to epithelial transition	5/1687	10/17970	0.00122008	Ctnnb1/Bmp4/Tcf15/Wnt9b/Grem1
GO:0048638	regulation of developmental growth	37/1687	235/17970	0.00122527	Wnt5a/Cyfip1/Eppk1/Rims2/Tbx2/Fgf9/Bmp4/Fdps/Ep300/Chd7/Cdkn1b/Prkn/Adrb3/Sema6c/Cpne9/Fstl4/Sh3pxd2b/Aatk/Draxin/Map3k13/Hnf1b/Mapt/Sgip1/Reg1/Gm46764/Wdr36/Slc23a2/Adnp/Ptger4/Foxc1/Dpysl2/Megf8/Dusp6/Tgfbr1/Sash3/Zfyve27/Mecp2
GO:0006220	pyrimidine nucleotide metabolic process	12/1687	48/17970	0.00127666	Agpat4/Uck2/Nme6/Entpd4/Entpd4b/Gm5867/Nme7/Dctd/Dck/Lclat1/Dhodh/Agpat5
GO:0009154	purine ribonucleotide catabolic process	10/1687	36/17970	0.00134668	Acot7/Entpd4/Nudt7/Entpd4b/Itpa/Pde8b/Nt5e/Entpd1/Ada/Gm52783
GO:0031589	cell-substrate adhesion	35/1687	220/17970	0.00136118	Parva/Poldip2/Itga8/Ctnnb1/Ppm1f/Lamb2/Ccn1/Sned1/Tyro3/Rin2/Ecm2/Spock2/Smoc2/Itgb4/Ephb3/Arhgap6/Bcl6/Lamb3/Limch1/Cdh13/Ccdc80/Dock1/Wdpcp/Postn/Col8a1/Grem1/Col16a1/Akip1/Rell2/Srcin1/Sirpa/Alox15/Bves/Ccl28/Olfm4
GO:0009185	ribonucleoside diphosphate metabolic process	18/1687	89/17970	0.00137621	Mtch2/Pgam1/Hk1/Gm29667/Entpd4/Eno1b/Ep300/Entpd4b/Nt5e/Tigar/Eno4/Adpgk/Entpd1/Hkdc1/Gpd1/Gapdh/Gm12070/Gm52783
GO:1903829	positive regulation of cellular protein localization	32/1687	196/17970	0.00138935	Edem1/Lrp4/Zc3h12a/Wipf1/Kcnb1/Riok2/Rangrf/Cd2ap/Slc5a3/Ep300/Pcm1/Prkn/Meak7/Tmem30b/Cct4/Gas8/Mapt/Epha2/Mief1/Mavs/Sesn2/Ctdspl2/Nptn/Glis2/Edem2/Gper1/Abhd17b/Prr5l/2700099C18Rik/Ppp1r9b/Hspa1l/Cep290
GO:0009260	ribonucleotide biosynthetic process	26/1687	149/17970	0.00143122	Adcy6/Elovl6/Uck2/Nme6/Acot7/Pdhx/Ampd2/Mpc1/Dnajc30/Pank1/Gucy1a1/Prkn/Pank4/COX2/Gm6581/Atp5d/Elovl5/Nme7/Adss/Ampd3/Ldhd/Atp5b/Entpd1/Adcy4/Adcy1/Dhodh
GO:0042493	response to drug	97/1687	768/17970	0.00149019	Ccnd1/Kdm3b/Smpd3/Hspa5/Pdx1/Rph3al/Egr1/Kcnq1/Cldn3/Ctnnb1/Dab1/Arg2/Slc28a2/Mmp2/Zc3h12a/Cd320/Kcnk3/Sord/Car4/Ppm1f/Bmp4/Gnpat/Inhba/Ndor1/Tac1/Aldh1a1/Ppp2ca/Mgst1/Rnf4/Dgkq/Casp8/Slc26a6/Pawr/P2rx6/Cyp2t4/Igfbp2/Ep300/Hpgd/Plekha1/Cdkn1b/Nr4a1/Prkn/Slc27a1/Dcps/Pcp4/Gnb5/Ptger2/Nos1/Amigo1/Pdxp/Wfdc1/Gip/Cpt1a/Per2/Slc25a26/Ddx11/Terf1/Tcn2/Hnf1b/Gm46878/Ly6g2/Reg1/Gnao1/Setd7/Cd27/Abca3/Tnf…
GO:0010638	positive regulation of organelle organization	58/1687	417/17970	0.00154142	Smpd3/Wnt5a/Ctnnb1/Cyfip1/Aurka/Ppm1f/Slain2/Tac1/Zfp13/Dcn/Chchd10/Birc5/Cep135/Nes/Ep300/Cdkn1b/Prkn/Cep295/Morc2a/Gm33950/Nos1/Pdxp/Irgm2/Adck1/Sh3pxd2b/Bcl6/Spast/Togaram1/Ddx11/Terf1/Mtf2/Cct4/Limch1/Pde4dip/Mapt/Mief1/Tnks/Gm20604/Resf1/Ttbk2/F2rl1/Zmynd10/Mapre1/Chtop/Fyco1/Gper1/Dnmt3b/Wasl/Hspa1l/Alox15/Tgfbr1/Tgfa/Mns1/Synpo2/Actr3/Atl3/Sgo2a/Mecp2
GO:0022904	respiratory electron transport chain	17/1687	83/17970	0.00159879	Mtch2/Cox7a1/Coa6/Uqcrc1/Ino80dos/COX2/Ndufs6b/Uqcrq/Ndufb9/Etfrf1/Ndufv3/Cox8b/Gpd1/Gm6293/Uqcrb/Cox4i1/Cox5b
GO:0044257	cellular protein catabolic process	75/1687	569/17970	0.00161008	Rnf213/Fbxo31/Hspa5/Edem1/Rnf128/Rnf34/Ctnnb1/Pomt2/Aurka/Dnajc10/Ubr3/Cul4a/Dda1/Abca2/Usp1/Psma4/Cd2ap/Rmnd5a/Lonp2/Rnf4/Bmal1/Gm9836/Casp8/Dtl/Caml/Usp15/Usp43/Trim72/Psmd6/Prkn/Ntan1/Peli1/Csnk2a1-ps3/Fbxo33/Tmem106b/Uchl5/Bnip3l-ps/Usp22/Cul1/Erlin1/Wac/Uchl1/Wfs1/Mylip/Usp30/Dcst1/Sh3rf2/Tnfaip3/Yme1l1/Marchf7/Styx/Klhl42/Ubqln2/Ophn1/Psme4/Tmem199/Fbxo38/Cul7/Rad23a/Laptm4b/Rnf146/Edem2/Ub…
GO:0050765	negative regulation of phagocytosis	6/1687	15/17970	0.0016107	Dysf/Lman2l/Prtn3/Pip4p2/Fer1l5/Sirpa
GO:0006790	sulfur compound metabolic process	40/1687	264/17970	0.00167559	Elovl6/Gstm2/Acot7/Pdhx/Gstp1/Mpc1/Enoph1/Ndor1/Acadsb/Dcn/Mgst1/Ggt6/Gstt3/Cth/Nudt7/Gstm7/Gsr/Nat8/Spock2/Gstp-ps/Isca2/4833422C13Rik/Tpst1/Particl/Ehhadh/Elovl5/Acot4/Kynu/Mmut/Txnrd3/Gm31597/Cbs/Nubpl/Acot9/Chac2/Mgst2/Nfs1/Acot2/Nubp2/Gsta5
GO:0043161	proteasome-mediated ubiquitin-dependent protein catabolic process	40/1687	264/17970	0.00167559	Fbxo31/Hspa5/Edem1/Rnf34/Ctnnb1/Aurka/Dnajc10/Ubr3/Cul4a/Dda1/Cd2ap/Rmnd5a/Rnf4/Bmal1/Gm9836/Caml/Trim72/Psmd6/Prkn/Peli1/Fbxo33/Uchl5/Cul1/Erlin1/Wac/Wfs1/Sh3rf2/Styx/Klhl42/Ubqln2/Fbxo38/Rad23a/Edem2/Sgtb/Fbxo45/Rnf103/Ubxn11/Ankzf1/Usp14/Psma5
GO:0006195	purine nucleotide catabolic process	10/1687	37/17970	0.00169232	Acot7/Entpd4/Nudt7/Entpd4b/Itpa/Pde8b/Nt5e/Entpd1/Ada/Gm52783
GO:0046847	filopodium assembly	10/1687	37/17970	0.00169232	Sh3bp1/Ppp1r9a/Itgb4/Vstm5/Rab5a/Abitram/Dock11/Ppp1r9b/Dpysl2/Tgfbr1
GO:0006396	RNA processing	95/1687	756/17970	0.00193948	Nop2/Srsf6/Ctu1/Leo1/Cmtr1/Zc3h12a/Zcchc4/Mrm2/Papola/Rtca/Aqr/Bmp4/Cwc22/Tut1/Myocd/Tyw3/Riok2/Rbm19/Imp4/Rps24/Slc38a2/Snrnp48/Mrpl44/Snrnp35/Exosc4/Wdr75/Srsf10/Ahnak/Nol9/Lcmt2/Tsen15/Chd7/Utp4/Trp53rka/Mtfmt/Dcps/Gm33178/Nifk/Thoc2l/Mto1/Prpf38a/Ints9/Isg20/Mphosph6/Trmt12/Rngtt/Pus1/Snrnp27/Dhx16/Kti12/Tyw1/Trmt9b/Gm35755/Aars2/Pus10/Exosc8/Ythdf2/Lsm8/Trnt1/Wdr36/Rbm4/Prpf40a/Toe1/Clk4/Nsr…
GO:0009108	coenzyme biosynthetic process	19/1687	99/17970	0.0019607	Elovl6/Pcbd2/Acot7/Pdhx/Fpgs/Mpc1/Coq6/Pdss2/Kmo/Pank1/Nmnat3/Mocs2/Pank4/Particl/Pcbd1/Elovl5/Kynu/Nmrk1/Gphn
GO:0009132	nucleoside diphosphate metabolic process	19/1687	99/17970	0.0019607	Mtch2/Pgam1/Hk1/Gm29667/Entpd4/Eno1b/Nudt7/Ep300/Entpd4b/Nt5e/Tigar/Eno4/Adpgk/Entpd1/Hkdc1/Gpd1/Gapdh/Gm12070/Gm52783
GO:0072672	neutrophil extravasation	5/1687	11/17970	0.00206444	Cd177/Pawr/Prtn3/Ptger4/Fut7
GO:0033365	protein localization to organelle	76/1687	584/17970	0.00212564	Mtch2/Hspa5/Edem1/Ddx3x/Zc3h12a/Kptn/Hk1/Aurka/Pom121/Fgf9/Bmp4/Cenpa/Srp54c/Arf4/Timm9/Cd2ap/Ppp2ca/Chchd10/Lonp2/Bmal1/Timm17b/Mid1/Caml/Ep300/Gm30251/Ipo4/Tram1/Pcm1/Prkn/Wapl/Meak7/Gm33950/Samm50/Ift56/Bnip3l-ps/Terf1/Cct4/Ssr3/Gm32340/Lmbrd1/Gas8/Mapt/Mavs/Tnfaip3/Tnks/Gm20604/Spdl1/Tmem98/Sesn2/Ophn1/Ttbk2/Tmco6/Zfyve16/Mcm8/Adam10/Akap11/Zmynd10/Glis2/Kpna4/Mapre1/Gper1/Rapgef4/Sgtb/Sort1/…
GO:0005996	monosaccharide metabolic process	36/1687	234/17970	0.00213073	Pdx1/Kcnq1/Hk1/Sord/Gm29667/Eno1b/Gm46840/Dgkq/Ep300/Prkn/Il11ra2/Galk2/H6pd/Ppp1cb/Cpt1a/Fam3a/G6pc3/Per2/Ppp1r3d/Tigar/Adpgk/Hkdc1/Sesn2/Pfkfb2/Slc23a2/Gpd1/Gapdh/Gdpgp1/Pask/Glb1/Gm12070/Dhdh/Rbks/Pfkfb3/Epm2aip1/Supt20
GO:0045743	positive regulation of fibroblast growth factor receptor signaling pathway	4/1687	7/17970	0.00214682	Ctnnb1/Smoc2/Nptn/Dstyk
GO:0009152	purine ribonucleotide biosynthetic process	24/1687	138/17970	0.00223714	Adcy6/Elovl6/Nme6/Acot7/Pdhx/Ampd2/Mpc1/Dnajc30/Pank1/Gucy1a1/Prkn/Pank4/COX2/Gm6581/Atp5d/Elovl5/Nme7/Adss/Ampd3/Ldhd/Atp5b/Entpd1/Adcy4/Adcy1
GO:0010564	regulation of cell cycle process	57/1687	415/17970	0.00224349	Ccnd1/Fbxo31/Smpd3/Nme6/Wnt5a/Poldip2/Ctc1/Cdc25a/Ctnnb1/Ddx3x/Aurka/Bmp4/Cul4a/Mad1l1/Riok2/Cenpf/Birc5/Rnf4/Dtl/Prc1/Mn1/Zwint/Cdkn1b/Wapl/Zfp36l2/Cep295/Cdkn1c/Gm33950/Pdxp/Csnk2a1-ps3/Ticrr/Myo19/Spast/Ddx11/Wac/Zfp655/Ythdf2/Gm2788/Gm46764/Tnks/Spdl1/Cul7/Map3k20/Gper1/Usp47/Xrcc3/2700099C18Rik/Pde3a/Atad5/Klhl13/Klhl9/Tgfa/Spice1/Rbl2/Sgo2a/Mecp2/Kif20a
GO:0045932	negative regulation of muscle contraction	7/1687	21/17970	0.00226249	Arg2/Zc3h12a/Gucy1a1/Arhgap42/Kcne3/Calcrl/Ptger4
GO:0030163	protein catabolic process	85/1687	668/17970	0.00230353	Rnf213/Fbxo31/Hspa5/Edem1/Wnt5a/Rnf128/Rnf34/Ctnnb1/Pomt2/Aurka/Dnajc10/Ubr3/Cul4a/Lypla1/Dda1/Abca2/Usp1/Psma4/Cd2ap/Ppp2ca/Rmnd5a/Lonp2/Rnf4/Bmal1/Gm9836/Casp8/Dtl/Caml/Usp15/Usp43/Cdkn1b/Trim72/Psmd6/Prkn/Ntan1/Peli1/Csnk2a1-ps3/Fbxo33/Tmem106b/Serpinb1a/Uchl5/Bnip3l-ps/Usp22/Cul1/Erlin1/Wac/Uchl1/Wfs1/Mylip/Usp30/Dcst1/Sh3rf2/Tnfaip3/Yme1l1/Marchf7/Styx/Klhl42/Ubqln2/Ophn1/Psme4/Tmem199/Fbxo3…
GO:0046390	ribose phosphate biosynthetic process	26/1687	154/17970	0.00231656	Adcy6/Elovl6/Uck2/Nme6/Acot7/Pdhx/Ampd2/Mpc1/Dnajc30/Pank1/Gucy1a1/Prkn/Pank4/COX2/Gm6581/Atp5d/Elovl5/Nme7/Adss/Ampd3/Ldhd/Atp5b/Entpd1/Adcy4/Adcy1/Dhodh
GO:0030155	regulation of cell adhesion	66/1687	496/17970	0.0023599	Wnt5a/Poldip2/Dab1/Arg2/Mmp2/Zc3h12a/Ppm1f/Bmp4/Ccn1/Nrarp/Kifap3/Lama1/Podxl/Gm38514/Pawr/Adgrg1/Igfbp2/Vnn1/Rin2/Nat8/Ecm2/Spock2/Smoc2/Prlr/Peli1/Ephb3/Ppp1cb/Arhgap6/Bcl6/Zfp608/Il18/Fgl2/Limch1/Il20rb/Epha2/Ythdf2/Atp5b/Cd27/Cdh13/Ccdc80/Dock1/Tnfaip3/Wdpcp/Postn/Marchf7/Col8a1/Btnl2/Grem1/Ada/Adam10/Col16a1/Cd83/Rell2/Ptger4/Fut7/Sirpa/Tnfrsf18/Icos/Pik3r6/Alox15/Sash3/Ccl28/Gpr4/Olfm4/Cblb…
GO:0072202	cell differentiation involved in metanephros development	6/1687	16/17970	0.00237393	Ctnnb1/Bmp4/Lamb2/Wnt9b/Lgr4/Grem1
GO:1903861	positive regulation of dendrite extension	6/1687	16/17970	0.00237393	Rims2/Prkn/Cpne9/Reg1/Slc23a2/Mecp2
GO:1904951	positive regulation of establishment of protein localization	33/1687	211/17970	0.00243578	Edem1/Pdx1/Rph3al/Myh10/Zc3h12a/Wipf1/Ppia/Kcnb1/Riok2/Exph5/Cd2ap/Gpr27/Cep135/Ep300/Pcm1/Prkn/Cep295/Gip/Tmem30b/Cct4/Mief1/Mavs/Ctdspl2/F2rl1/Edem2/Gper1/Ptger4/Rapgef4/Prr5l/Hspa1l/Tmed10-ps/Unc13b/Cep290
GO:0072523	purine-containing compound catabolic process	11/1687	45/17970	0.00243951	Nudt1/Acot7/Entpd4/Nudt7/Entpd4b/Itpa/Pde8b/Nt5e/Entpd1/Ada/Gm52783
GO:0043085	positive regulation of catalytic activity	93/1687	744/17970	0.00251741	Ccnd1/Mtch2/Wnt5a/Tab1/Egr1/Cldn3/Ctnnb1/Ddx3x/Dab1/Dnajc10/Ppia/Ppm1f/Ltf/Gpihbp1/Snx18/Bmp4/Ccn1/Arf4/Pik3cg/Ppp2ca/Sh3bp1/Ror2/Ywhab/Map3k21/Avpi1/Gpr55/Casp8/Map3k7/Ccl8/Pawr/Tyro3/Dennd1b/Slc5a3/Gmip/Fgfr3/Cdkn1b/Slc27a1/Ppp1r9a/Ccl20/Ccl9/Myl4/Prlr/Gnb5/Sipa1l1/Arhgap42/Nos1/Wnt9b/Ephb3/Arhgap29/Irgm2/Arhgap6/Tmem106b/Il18/Map3k13/Ddx11/Tigar/Arrdc4/Cct4/Pik3r5/Snora73b/Mmut/Edn2/Nus1/Epha2…
GO:0051603	proteolysis involved in cellular protein catabolic process	70/1687	534/17970	0.00259743	Rnf213/Fbxo31/Hspa5/Edem1/Rnf128/Rnf34/Ctnnb1/Pomt2/Aurka/Dnajc10/Ubr3/Cul4a/Dda1/Usp1/Psma4/Cd2ap/Rmnd5a/Lonp2/Rnf4/Bmal1/Gm9836/Casp8/Dtl/Caml/Usp15/Usp43/Trim72/Psmd6/Prkn/Ntan1/Peli1/Csnk2a1-ps3/Fbxo33/Uchl5/Usp22/Cul1/Erlin1/Wac/Uchl1/Wfs1/Mylip/Usp30/Dcst1/Sh3rf2/Tnfaip3/Yme1l1/Marchf7/Styx/Klhl42/Ubqln2/Ophn1/Psme4/Fbxo38/Cul7/Rad23a/Rnf146/Edem2/Ubap1/Usp47/Sgtb/Fbxo45/F8a/Otud7a/Rnf103/U…
GO:0043244	regulation of protein-containing complex disassembly	18/1687	94/17970	0.00260905	Tmod3/Sh3bp1/Eps8/Shfl/Mid1/Nes/Sptbn2/Pdxp/Irgm2/Spast/Per2/Jmjd4/Capza2/Ttbk2/F2rl1/Plekhh2/Fyco1/Avil
GO:0048806	genitalia development	9/1687	33/17970	0.00266822	Wnt5a/Ctnnb1/Ror2/Tyro3/Chd7/Wnt9b/Stra6/Hnf1b/Lgr4
GO:0042775	mitochondrial ATP synthesis coupled electron transport	13/1687	59/17970	0.00279212	Mtch2/Cox7a1/Coa6/Uqcrc1/Ndufs6b/Uqcrq/Ndufb9/Ndufv3/Cox8b/Gm6293/Uqcrb/Cox4i1/Cox5b
GO:0046031	ADP metabolic process	16/1687	80/17970	0.00279348	Mtch2/Pgam1/Hk1/Gm29667/Eno1b/Ep300/Nt5e/Tigar/Eno4/Adpgk/Entpd1/Hkdc1/Gpd1/Gapdh/Gm12070/Gm52783
GO:0097435	supramolecular fiber organization	72/1687	554/17970	0.00283403	Tmsb4x/Krt19/Marcks/Katna1/Cyfip1/Eppk1/Kptn/Wipf1/Tmod3/Gm13612/Ppm1f/Slain2/Tubgcp4/Tac1/Rangrf/Dpt/Cd2ap/Sh3bp1/Eps8/Shroom1/Nefm/Pawr/Mid1/Ep300/Pcm1/Cdkn1b/Washc3/Prkn/Ppp1r9a/Tubgcp2/Pkp2/Zbed3/Sptbn2/Gm52861/Pdxp/Myo19/Sh3pxd2b/Arhgap6/Abi1/Spast/Togaram1/Sorbs3/Limch1/Pde4dip/Mapt/Mzt1/Capza2/Crtap/Grem1/Ttbk2/F2rl1/Mapre1/Plekhh2/Sh3kbp1/Ptger4/Hook1/Foxc1/Sirpa/Avil/Abitram/Ppp1r9b/Wasl…
GO:1905330	regulation of morphogenesis of an epithelium	15/1687	73/17970	0.00284197	Wnt5a/Ctnnb1/Tbx2/Bmp4/Fkbpl/Ror2/Jhy/Wnt9b/Sapcd2/Sec24b/Sox8/Hnf1b/Lgr4/Grem1/Btbd7
GO:0060322	head development	68/1687	518/17970	0.00286241	Gdpd5/Phf8/Hspa5/Snph/Wnt5a/Itga8/Ctnnb1/Dab1/Mmp2/Crispld2/Bmp4/Gnpat/Inhba/Pdss2/Arf4/Cenpf/Slc38a2/Dnajc30/Mast1/Tyro3/Adgrg1/Nes/Nrp2/Hoxb3/Ccdc134/Ep300/Chd7/Jhy/Pitx2/Pcm1/Rab18/Plekha1/Npy/Sptbn2/Wnt9b/Meis3/Amigo1/Ephb3/Csnk2a1-ps3/Uqcrq/Aatk/Draxin/Uchl5/Sec24b/Smad9/Herc1/Stra6/Gm32340/Hnf1b/Gas8/Faim2/Gnao1/Eif2b3/Ophn1/Ttbk2/Nnat/Atp6ap2/Adcy1/Septin4/Foxc1/Fbxo45/Egr2/Cntn1/Ppp1r9b/D…
GO:0032880	regulation of protein localization	76/1687	591/17970	0.00290904	Edem1/Pdx1/Wnt5a/Rph3al/Kcnq1/Myh10/Ctnnb1/Lrp4/Zc3h12a/Wipf1/Stx6/Ppia/Ppm1f/Bmp4/Kcnb1/Riok2/Rangrf/Exph5/Cd2ap/Ppp2ca/Birc5/Bmal1/Gpr27/Cep135/Slc5a3/Ep300/Pcm1/Prkn/Wapl/Cep295/Meak7/Nos1/Csnk2a1-ps3/Gip/Sapcd2/Cpt1a/Rab9/Per2/Bnip3l-ps/Tmem30b/Terf1/Cct4/Gm32340/Gas8/Mapt/Epha2/Mief1/Mavs/Wdpcp/Ccne2/Tmem98/Sesn2/Ophn1/Ctdspl2/Ttbk2/Ica1/Nptn/Adam10/F2rl1/Glis2/2700049A03Rik/Edem2/Jagn1/Gper…
GO:0043954	cellular component maintenance	11/1687	46/17970	0.00293902	Cldn3/Cd177/Myocd/Chchd10/Pkp2/Mtmr2/Prtn3/Ophn1/F2rl1/Abhd17b/Gphn
GO:1900542	regulation of purine nucleotide metabolic process	11/1687	46/17970	0.00293902	Mtch2/Pgam1/Dnajc30/Ep300/Prkn/COX2/Nos1/Tigar/Entpd1/Gpd1/Nos3
GO:0044087	regulation of cellular component biogenesis	85/1687	674/17970	0.00295733	Tmsb4x/Smpd3/Hspa5/Wnt5a/Poldip2/Cldn3/Ddx3x/Cyfip1/Tmod3/Ppm1f/Slain2/Cdh17/Ccn1/Abca2/Tac1/Riok2/Rangrf/Malsu1/Eps8/Rnf4/Wdr75/Map3k7/Cep135/Ep300/Cdkn1b/Prkn/Ppp1r9a/Cep295/Pkp2/Sptbn2/Sipa1l1/Gm52861/Amigo1/Ephb3/Lrfn4/Irgm2/Sh3pxd2b/Arhgap6/Togaram1/Vstm5/Lrrc4b/Terf1/Pld1/Limch1/Pde4dip/Setd5/Mapt/Rab5a/Capza2/Epha2/Ythdf2/Abca3/Wdpcp/Vdac3/Odf2l/Ubqln2/Grem1/Ttbk2/Tbc1d30/F2rl1/Lcat/Zmynd1…
GO:1903047	mitotic cell cycle process	63/1687	474/17970	0.00300311	Ccnd1/Fbxo31/Phf8/Smpd3/Nme6/Poldip2/Myh10/Ctc1/Cdc25a/Ddx3x/Aurka/Dynlt1c/Ccni/Snx18/Bmp4/Cul4a/Mad1l1/Cenpa/Inhba/Riok2/Cenpf/Birc5/Dtl/Prc1/Nes/Spry2/Rec8/Zwint/Cdkn1b/Zfp36l2/Cdkn1c/Klf11/Gm33950/Pdxp/Ticrr/Sapcd2/Spast/Togaram1/Ndel1/Wac/Zfp655/Mzt1/E2f5/Cep55/Tnks/Spdl1/Ccne2/Nsl1/Cul7/Tcf19/Map3k20/Usp47/Xrcc3/2700099C18Rik/Togaram2/Atad5/Tgfa/Kat14/Spice1/Rbl2/Sgo2a/Mecp2/Kif20a
GO:0010726	positive regulation of hydrogen peroxide metabolic process	3/1687	4/17970	0.00307189	Zfp13/Duoxa2/COX2
GO:0010729	positive regulation of hydrogen peroxide biosynthetic process	3/1687	4/17970	0.00307189	Zfp13/Duoxa2/COX2
GO:0046032	ADP catabolic process	3/1687	4/17970	0.00307189	Nt5e/Entpd1/Gm52783
GO:0061325	cell proliferation involved in outflow tract morphogenesis	3/1687	4/17970	0.00307189	Ctnnb1/Bmp4/Pitx2
GO:0072217	negative regulation of metanephros development	3/1687	4/17970	0.00307189	Ctnnb1/Bmp4/Hnf1b
GO:0097052	L-kynurenine metabolic process	3/1687	4/17970	0.00307189	Kmo/Kynu/Kyat3
GO:0048639	positive regulation of developmental growth	21/1687	118/17970	0.00307595	Cyfip1/Rims2/Tbx2/Fgf9/Fdps/Ep300/Chd7/Prkn/Cpne9/Sh3pxd2b/Map3k13/Mapt/Sgip1/Reg1/Slc23a2/Adnp/Ptger4/Megf8/Sash3/Zfyve27/Mecp2
GO:0006511	ubiquitin-dependent protein catabolic process	60/1687	448/17970	0.00313311	Rnf213/Fbxo31/Hspa5/Edem1/Rnf128/Rnf34/Ctnnb1/Aurka/Dnajc10/Ubr3/Cul4a/Dda1/Usp1/Psma4/Cd2ap/Rmnd5a/Rnf4/Bmal1/Gm9836/Dtl/Caml/Usp15/Usp43/Trim72/Psmd6/Prkn/Ntan1/Peli1/Csnk2a1-ps3/Fbxo33/Uchl5/Usp22/Cul1/Erlin1/Wac/Uchl1/Wfs1/Mylip/Usp30/Dcst1/Sh3rf2/Tnfaip3/Styx/Klhl42/Ubqln2/Fbxo38/Cul7/Rad23a/Rnf146/Edem2/Ubap1/Usp47/Sgtb/Fbxo45/Otud7a/Rnf103/Ubxn11/Ankzf1/Usp14/Psma5
GO:0009261	ribonucleotide catabolic process	10/1687	40/17970	0.00317766	Acot7/Entpd4/Nudt7/Entpd4b/Itpa/Pde8b/Nt5e/Entpd1/Ada/Gm52783
GO:0010811	positive regulation of cell-substrate adhesion	16/1687	81/17970	0.00318428	Poldip2/Ppm1f/Ccn1/Rin2/Ecm2/Spock2/Smoc2/Cdh13/Ccdc80/Dock1/Col8a1/Col16a1/Rell2/Alox15/Ccl28/Olfm4
GO:0000002	mitochondrial genome maintenance	5/1687	12/17970	0.00326701	Mgme1/Mrpl15/Sesn2/Slc25a33/Pif1
GO:0009111	vitamin catabolic process	5/1687	12/17970	0.00326701	Cyp4f40/Pdxp/Cyp4f18/Crabp1/Gm32342
GO:0009191	ribonucleoside diphosphate catabolic process	5/1687	12/17970	0.00326701	Entpd4/Entpd4b/Nt5e/Entpd1/Gm52783
GO:0010310	regulation of hydrogen peroxide metabolic process	5/1687	12/17970	0.00326701	Zfp13/Duoxa2/Noxa1/COX2/Ptger4
GO:0008016	regulation of heart contraction	20/1687	111/17970	0.0032902	Gaa/Kcnq1/Zc3h12a/Tbx2/Tac1/Rangrf/Adm/Hrc/Myl4/Pkp2/Nos1/Popdc2/Slc4a3/Edn2/Gnao1/Kcne3/Ada/Bves/Dsp/Nos3
GO:0030516	regulation of axon extension	14/1687	67/17970	0.00329372	Wnt5a/Cyfip1/Ep300/Sema6c/Aatk/Draxin/Map3k13/Mapt/Gm46764/Wdr36/Adnp/Dpysl2/Megf8/Zfyve27
GO:0080135	regulation of cellular response to stress	61/1687	458/17970	0.0033027	Hmga1b/Mtch2/Hspa5/Edem1/Pdx1/Wnt5a/Ctnnb1/Arg2/Zc3h12a/Lpcat3/Ppia/Cul4a/Slc30a10/Usp1/Slc38a2/Smyd2/Ror2/Map3k21/Bmal1/Unc5cl/Traf3/Map3k7/Pawr/Mid1/Vnn1/Ddah1/Prkn/Nbr1/Mturn/Meak7/Ell3/Ier3/Bcl6/Ercc6/Map3k13/Ddx11/Tigar/Eya2/Ier5/Mapt/Wfs1/Npas2/Cd27/Sh3rf2/Marchf7/Ubqln2/Rnf146/Rad52/F2rl1/Map3k20/Edem2/Ncoa7/Rell2/Usp47/Sirpa/Polq/Spred1/Atad5/Dnaja1/Terf2ip/Rnft1
GO:0010243	response to organonitrogen compound	86/1687	686/17970	0.00330775	Slc2a4/Smpd3/Hspa5/Edem1/Pdx1/Egr1/Kcnq1/Ctnnb1/Pomt2/Mmp2/Cyfip1/Dnajc10/Sesn3/Tac1/Slc30a10/Adm/Pik3cg/Ppp2ca/Mgst1/Uqcrc1/Dgkq/Slc26a6/P2rx6/Reg3a/Cdkn1b/Trim72/Nr4a1/Prkn/Slc27a1/Fads1/Meak7/Klf11/Zbed3/Gnb5/Nos1/Amigo1/Pdxp/Gip/Cpt1a/Pla2g5/Il18/Ddx11/Erlin1/Slc26a3/Wfs1/Mylip/Reg1/Gnao1/Cdh13/Tnfaip3/Eif2b3/Sesn2/Aqp8/Ubqln2/Slc25a33/Ada/Gpd1/Nucb2/Serpina3g/Col16a1/Edem2/Gper1/Bche/Abcg2/F…
GO:0071236	cellular response to antibiotic	18/1687	96/17970	0.00331124	Smpd3/Hspa5/Egr1/Zc3h12a/Ppp2ca/Pawr/Plekha1/Cdkn1b/Ddx11/Tnfaip3/Rnf146/Slc23a2/Jagn1/Adcy1/Sirpa/Oser1/Ankzf1/Star
GO:0072329	monocarboxylic acid catabolic process	18/1687	96/17970	0.00331124	Cpt2/Cyp4f40/Tysnd1/Echdc1/Lonp2/Nudt7/Hpgd/Hadhb/Cpt1a/Aldh5a1/Ehhadh/Ldhd/Sesn2/Cyp4f18/Crabp1/Lpin1/Acot2/Gm32342
GO:0009064	glutamine family amino acid metabolic process	27/1687	166/17970	0.0033215	Prodh/Arg2/Fpgs/Nags/Gm46829/Ddah1/Gm31349/Agmat/Gm36787/Nos1/Gm54336/Hal/Aldh5a1/Gls2/Gm16702/Pycr1/Gm36375/Gm41608/Gm36279/Ddah2/Gm42245/Asns/Otc/Dglucy/Nos3/Mecp2/Gm41450
GO:0031112	positive regulation of microtubule polymerization or depolymerization	8/1687	28/17970	0.00332594	Slain2/Cdkn1b/Spast/Togaram1/Pde4dip/Mapt/Mapre1/Mecp2
GO:0045601	regulation of endothelial cell differentiation	8/1687	28/17970	0.00332594	Ctnnb1/Bmp4/Atoh8/Cul7/Akap11/Proc/Tgfbr1/Zeb1
GO:0044255	cellular lipid metabolic process	101/1687	826/17970	0.00333314	Cpt2/Elovl6/Agpat4/Smpd3/Cyp4f40/Hacd2/Inpp5j/Acp6/Acot7/Pgap3/Hycc2/Mecr/Lpcat3/Impa1/Tysnd1/Pgap2/Pigv/Degs1/Rdh12/Echdc1/Ccn1/Lypla1/Abca2/Gnpat/Pdss2/Fdps/Acadsb/Aldh1a1/Pik3cg/Lonp2/Mboat2/Dolk/Dgkq/Pyurf/Nudt7/Plpp5/Cyp2t4/Hpgd/Plppr1/Fgfr3/Gbgt1/Slc27a1/Hadhb/Fads1/Pigg/Pigl/Prmt3/Mtmr7/Ndufs6b/Pdxp/Gip/Cpt1a/4833422C13Rik/Rdh1/Per2/Pla2g5/Dhrs13/Cers6/Ehhadh/Elovl5/Pld1/Amacr/Acot4/Pik3r5…
GO:0048812	neuron projection morphogenesis	54/1687	396/17970	0.00335841	Ywhah/Fbxo31/Wnt5a/Ctnnb1/Dab1/Lrp4/Cyfip1/Aurka/Rims2/Lamb2/Raph1/Lama1/Nrp2/Ep300/Prkn/Sema6c/Ppp1r9a/Prmt3/Sema4f/Sipa1l1/Amigo1/Cpne9/Ephb3/Fstl4/Spast/Aatk/Draxin/Tmem106b/Map3k13/Mapt/Reg1/Epha2/Gm46764/Postn/Lgr4/Pak6/Wdr36/Ss18l1/Cul7/Nptn/Slc23a2/Adam10/Adnp/Adcy1/Srcin1/Fbxo45/Slitrk4/Egr2/Abitram/Sh3gl2/Dpysl2/Megf8/Zfyve27/Mecp2
GO:0006886	intracellular protein transport	84/1687	668/17970	0.00337443	Ap4s1/Ywhah/Tomm20/Hspa5/Edem1/Rph3al/Frat1/Zc3h12a/Wipf1/Copg2/Stx6/Rims2/Syngr1/Reep2/Nxf1/Pom121/Fgf9/Gpihbp1/Bmp4/Kcnb1/Hps4/Srp54c/Riok2/Rangrf/Exph5/Rab19/Arf4/Timm9/Ppp2ca/Ywhab/Tmed3/Lonp2/Bmal1/Timm17b/Copb2/Ep300/Gm30251/Ipo4/Nup160/Tram1/Pcm1/Rab18/Thoc2l/Gm16261/Samm50/Ift56/Sec24b/Snx5/Bnip3l-ps/Tmem30b/Ssr3/Gm32340/Gm46350/Rab5a/Mief1/Mavs/Styx/Ap1m2/Ctdspl2/Tmco6/Tbc1d30/Zfyve16/Kp…
GO:0009109	coenzyme catabolic process	6/1687	17/17970	0.00338014	Cyp4f40/Acot7/Nudt7/Pdxp/Nqo2/Cyp4f18
GO:0043687	post-translational protein modification	6/1687	17/17970	0.00338014	Abca2/Lcmt2/Irgm2/Esco1/Crtap/Gm46764
GO:0016052	carbohydrate catabolic process	21/1687	119/17970	0.00341253	Mtch2/Pgam1/Gaa/Hk1/Sord/Gm29667/Eno1b/Ep300/Il11ra2/Ppp1cb/Ppp1r3d/Tigar/Eno4/Adpgk/Hkdc1/Gpd1/Gapdh/Glb1/Gm12070/Dhdh/Rbks
GO:0030307	positive regulation of cell growth	21/1687	119/17970	0.00341253	Ddx3x/Cyfip1/Rims2/Fdps/Exosc4/Ep300/Prkn/Cpne9/Csnk2a1-ps3/Map3k13/Mapt/Reg1/Slc25a33/Slc23a2/Adam10/Adnp/Usp47/Megf8/Tgfbr1/Zfyve27/Mecp2
GO:0032990	cell part morphogenesis	58/1687	432/17970	0.00344104	Ywhah/Fbxo31/Wnt5a/Poldip2/Ctnnb1/Dab1/Lrp4/Cyfip1/Aurka/Rims2/Lamb2/Raph1/Lama1/Nes/Nrp2/Ep300/Prkn/Sema6c/Ppp1r9a/Prmt3/Sema4f/Sipa1l1/Ndufs6b/Amigo1/Cpne9/Ephb3/Fstl4/Spast/Aatk/Draxin/Tmem106b/Map3k13/Mapt/Reg1/Epha2/Gm46764/Postn/Lgr4/Pak6/Wdr36/Ss18l1/Cul7/Nptn/Nubpl/Slc23a2/Adam10/Adnp/Adcy1/Srcin1/Fbxo45/Slitrk4/Egr2/Abitram/Sh3gl2/Dpysl2/Megf8/Zfyve27/Mecp2
GO:0033865	nucleoside bisphosphate metabolic process	17/1687	89/17970	0.00347555	Elovl6/Acot7/Pdhx/Mpc1/Acadsb/Pank1/Nudt7/Pank4/4833422C13Rik/Ehhadh/Elovl5/Acot4/Kynu/Gm31597/Acot9/Hmgcr/Acot2
GO:0033875	ribonucleoside bisphosphate metabolic process	17/1687	89/17970	0.00347555	Elovl6/Acot7/Pdhx/Mpc1/Acadsb/Pank1/Nudt7/Pank4/4833422C13Rik/Ehhadh/Elovl5/Acot4/Kynu/Gm31597/Acot9/Hmgcr/Acot2
GO:0034032	purine nucleoside bisphosphate metabolic process	17/1687	89/17970	0.00347555	Elovl6/Acot7/Pdhx/Mpc1/Acadsb/Pank1/Nudt7/Pank4/4833422C13Rik/Ehhadh/Elovl5/Acot4/Kynu/Gm31597/Acot9/Hmgcr/Acot2
GO:0006140	regulation of nucleotide metabolic process	11/1687	47/17970	0.00351759	Mtch2/Pgam1/Dnajc30/Ep300/Prkn/COX2/Nos1/Tigar/Entpd1/Gpd1/Nos3
GO:0022402	cell cycle process	96/1687	781/17970	0.00356651	Ccnd1/Fbxo31/Phf8/Smpd3/Nme6/Wnt5a/Poldip2/Myh10/Ctc1/Cdc25a/Ctnnb1/Ddx3x/Aurka/Dynlt1c/Ccni/Snx18/Bmp4/Cul4a/Mad1l1/Cenpa/Tubgcp4/Inhba/Bnip2/Riok2/Cenpf/Birc5/Rnf4/Haus2/Dtl/Cep135/Prc1/Nes/Spry2/Mn1/Rec8/Zwint/Pcm1/Cdkn1b/Wapl/Zfp36l2/Cep295/Cdkn1c/Klf11/Zbed3/Zscan21/Gm33950/Pdxp/Csnk2a1-ps3/Ticrr/Myo19/Sapcd2/Spast/Togaram1/Ndel1/Ddx11/Terf1/Pde4dip/Wac/Esco1/Zfp655/Mzt1/Ythdf2/Gm2788/E2f5/C…
GO:0040007	growth	86/1687	689/17970	0.00372782	Igfbp7/Smpd3/Nme6/Wnt5a/Ctc1/Ctnnb1/Ddx3x/Lrp4/Cyfip1/Eppk1/Bltp1/Aurka/Rims2/Tbx2/Ppm1f/Fgf9/Bmp4/Myocd/Lamb2/Inhba/Fdps/Adm/Raph1/Exosc4/Cth/Nrp2/Spry2/Igfbp2/Ep300/Chd7/Plekha1/Cdkn1b/Prkn/Adrb3/Dhcr7/Sema6c/Smarca2/Cdkn1c/Prlr/Sptbn2/Ndufs6b/Cpne9/Csnk2a1-ps3/Fstl4/Wfdc1/Rbbp7/Sh3pxd2b/Bcl6/Aatk/Draxin/Gng4/Ercc6/Map3k13/Stra6/Hnf1b/Mapt/Sgip1/Wfs1/Reg1/Sp2/Gm46764/Postn/Sesn2/Pak6/Wdr36/Grem…
GO:0060341	regulation of cellular localization	69/1687	533/17970	0.00376426	Edem1/Pdx1/Wnt5a/Ctnnb1/Lrp4/Zc3h12a/Wipf1/Stx6/Reep2/Ppm1f/Bmp4/Kcnb1/Abca2/Riok2/Rangrf/Cd2ap/Ppp2ca/Dnajc30/Birc5/Gpr27/Hrc/Slc5a3/Ep300/Chd7/Pcm1/Prkn/Wapl/Meak7/Csnk2a1-ps3/Sapcd2/Sec24b/Bnip3l-ps/Tmem30b/Terf1/Cct4/Gm32340/Mtmr2/Gas8/Mapt/Nus1/Epha2/Mief1/Mavs/Rhot1/Gm46764/Ccne2/Tmem98/Sesn2/Ophn1/Ctdspl2/Ttbk2/Nptn/Cxcl11/Adam10/Glis2/Edem2/Jagn1/Gper1/Rapgef4/Abhd17b/Prr5l/2700099C18Rik/…
GO:0006766	vitamin metabolic process	13/1687	61/17970	0.00379907	Cyp4f40/Cd320/Vkorc1/Kmo/Vnn1/Prmt3/Pdxp/Kynu/Cyp4f18/Clybl/Slc23a2/Crabp1/Gm32342
GO:0045017	glycerolipid biosynthetic process	22/1687	128/17970	0.00386601	Agpat4/Pgap3/Lpcat3/Pgap2/Pigv/Pik3cg/Dgkq/Pyurf/Slc27a1/Pigg/Pigl/Pla2g5/Pld1/Lcat/Mogat2/Lpin1/Avil/Lclat1/Alox15/Cnep1r1/Pla2g4c/Agpat5
GO:0006575	cellular modified amino acid metabolic process	26/1687	160/17970	0.00395866	Cpt2/Gstm2/Lpcat3/Gstp1/Fpgs/Mgst1/Duoxa2/Ggt6/Mboat2/Gstt3/Cth/Gstm7/Vnn1/Gsr/Nat8/Slc27a1/Gstp-ps/Slco4a1/Cpt1a/Txnrd3/Chac2/Mgst2/Serinc2/Shmt1/Cpq/Gsta5
GO:0009790	embryo development	99/1687	812/17970	0.00396408	Cpt2/Krt19/Hspa5/Pdx1/Leo1/Wnt5a/Tab1/Frat1/Kcnq1/Itga8/Ctnnb1/Lrp4/Mmp2/Ubr3/Tbx2/Fgf9/Bmp4/Cul4a/Ccn1/Inhba/Bnip2/Rbm19/Adm/Aldh1a1/Gm16023/Eno1b/Nrarp/Luzp1/Lama1/Ror2/Atoh8/Sobp/Casp8/Map3k7/Nes/Nrp2/Spry2/Hoxb3/Ccdc134/Ep300/Chd7/Pitx2/Slc30a1/Tcf15/Nat8/Elf3/Slc39a3/Cdkn1c/Zbed3/Wnt9b/Uspl1/Meis3/Itgb4/Gorab/Lamb3/Gm47324/Sec24b/Stra6/Dnaaf2/Sox8/1700034H15Rik/Hnf1b/Etl4/Snora73b/Lmbrd1/Eph…
GO:0003337	mesenchymal to epithelial transition involved in metanephros morphogenesis	4/1687	8/17970	0.00397515	Ctnnb1/Bmp4/Wnt9b/Grem1
GO:0034145	positive regulation of toll-like receptor 4 signaling pathway	4/1687	8/17970	0.00397515	Ltf/Peli1/F2rl1/Ifi35
GO:0043471	regulation of cellular carbohydrate catabolic process	4/1687	8/17970	0.00397515	Pgam1/Ppp1cb/Ppp1r3d/Tigar
GO:0097501	stress response to metal ion	4/1687	8/17970	0.00397515	Hspa5/Slc30a10/Slc30a1/1700034H15Rik
GO:0098814	spontaneous synaptic transmission	4/1687	8/17970	0.00397515	Rims2/Prkn/Ppp1r9a/Unc13b
GO:0019941	modification-dependent protein catabolic process	60/1687	453/17970	0.00401448	Rnf213/Fbxo31/Hspa5/Edem1/Rnf128/Rnf34/Ctnnb1/Aurka/Dnajc10/Ubr3/Cul4a/Dda1/Usp1/Psma4/Cd2ap/Rmnd5a/Rnf4/Bmal1/Gm9836/Dtl/Caml/Usp15/Usp43/Trim72/Psmd6/Prkn/Ntan1/Peli1/Csnk2a1-ps3/Fbxo33/Uchl5/Usp22/Cul1/Erlin1/Wac/Uchl1/Wfs1/Mylip/Usp30/Dcst1/Sh3rf2/Tnfaip3/Styx/Klhl42/Ubqln2/Fbxo38/Cul7/Rad23a/Rnf146/Edem2/Ubap1/Usp47/Sgtb/Fbxo45/Otud7a/Rnf103/Ubxn11/Ankzf1/Usp14/Psma5
GO:0035239	tube morphogenesis	78/1687	617/17970	0.00403463	Parva/Rnf213/Fgf1/Wnt5a/Ctnnb1/Mmp2/Zc3h12a/Tbx2/Fgf9/Bmp4/Myocd/Fkbpl/Ccn1/Adm/Dcn/Pik3cg/Nrarp/Luzp1/Lama1/Atoh8/Casp8/Map3k7/Adgra2/Adgrg1/Nrp2/Spry2/Hoxb3/Ccdc134/Hpgd/Chd7/Hspb6/Pitx2/Ddah1/Rin2/Plcd3/Nr4a1/Col15a1/Smoc2/Wnt9b/Ephb3/Sec24b/Il18/Stra6/Sox8/Hnf1b/Snora73b/Mgp/Nus1/Epha2/Atp5b/Gm2788/Cdh13/Dnaaf1/Ubp1/Lgr4/Col8a1/Cul7/Grem1/Erap1/Pgf/Calcrl/Ptger4/Foxc1/Col8a2/Pik3r6/C6/Spred1/…
GO:0010560	positive regulation of glycoprotein biosynthetic process	7/1687	23/17970	0.00403714	Ctnnb1/Pomt2/Abca2/Pomt1/Pawr/Ep300/Pxylp1
GO:1903020	positive regulation of glycoprotein metabolic process	7/1687	23/17970	0.00403714	Ctnnb1/Pomt2/Abca2/Pomt1/Pawr/Ep300/Pxylp1
GO:0061387	regulation of extent of cell growth	15/1687	76/17970	0.00425405	Wnt5a/Cyfip1/Ep300/Sema6c/Fstl4/Aatk/Draxin/Map3k13/Mapt/Gm46764/Wdr36/Adnp/Dpysl2/Megf8/Zfyve27
GO:0051640	organelle localization	46/1687	330/17970	0.00427422	Ctnnb1/Dab1/Bltp1/Aurka/Stx6/Dynlt1c/Rims2/Kcnb1/Cenpa/Riok2/Milr1/Cenpf/Pik3cg/Birc5/Hps6/Spry2/Bloc1s6/Pcm1/Prkn/Zbed3/Myo19/Sapcd2/Arfgap2/Spast/Tmem106b/Mreg/Terf1/Mapt/Rhot1/Gm46764/Spdl1/Cdc42bpa/Cep19/Fyco1/F8a/2700099C18Rik/Borcs6/Ikbkg/Tmed10-ps/Bves/Ltv1/Unc13b/Spice1/Cep290/Mecp2/Pex1
GO:0007584	response to nutrient	25/1687	153/17970	0.00433009	Pdx1/Gnpat/Pdia3/Dgkq/P2rx6/Igfbp2/Mn1/Pitx2/Prkn/Fads1/Amigo1/Pdxp/Mapt/Postn/Tnks/Ada/Bche/Abcg2/Casp1/Cox4i1/Hlcs/Dnmt3b/Otc/Tbxa2r/Star
GO:0006749	glutathione metabolic process	14/1687	69/17970	0.00436101	Gstm2/Gstp1/Mgst1/Ggt6/Gstt3/Cth/Gstm7/Gsr/Nat8/Gstp-ps/Txnrd3/Chac2/Mgst2/Gsta5
GO:0048858	cell projection morphogenesis	55/1687	410/17970	0.00438444	Ywhah/Fbxo31/Wnt5a/Ctnnb1/Dab1/Lrp4/Cyfip1/Aurka/Rims2/Lamb2/Raph1/Lama1/Nes/Nrp2/Ep300/Prkn/Sema6c/Ppp1r9a/Prmt3/Sema4f/Sipa1l1/Amigo1/Cpne9/Ephb3/Fstl4/Spast/Aatk/Draxin/Tmem106b/Map3k13/Mapt/Reg1/Epha2/Gm46764/Postn/Lgr4/Pak6/Wdr36/Ss18l1/Cul7/Nptn/Slc23a2/Adam10/Adnp/Adcy1/Srcin1/Fbxo45/Slitrk4/Egr2/Abitram/Sh3gl2/Dpysl2/Megf8/Zfyve27/Mecp2
GO:0001667	ameboidal-type cell migration	39/1687	270/17970	0.00444223	Wnt5a/Zc3h12a/Eppk1/Ppm1f/Bmp4/Tac1/Dcn/Pik3cg/Sh3bp1/Atoh8/Patz1/Adgra2/Nrp2/Pitx2/Rin2/Nr4a1/Sema6c/Smoc2/Itgb4/Pkn3/Sox8/Snora73b/Nus1/Epha2/Atp5b/Cdh13/Dock1/Wdpcp/Grem1/Prr5l/Spred1/Megf8/Tgfbr1/Tbxa2r/Nos3/Macir/Mecp2/Egr3/Timp1
GO:0044057	regulation of system process	54/1687	402/17970	0.00459494	Gaa/Kcnq1/Arg2/Mmp2/Zc3h12a/Lpcat3/Rims2/Tbx2/Grin2d/Myocd/Igsf9b/Inhba/Tac1/Rangrf/Fdps/Adm/Gucy1a1/Pawr/Hrc/Ep300/Hspb6/Nr4a1/Prkn/Myl4/Pkp2/Ptger2/Arhgap42/Nos1/Popdc2/Begain/Per2/Slc4a3/Mtmr2/Edn2/Gnao1/Tmem98/Kcne3/Ada/F2rl1/Calcrl/Gper1/Ptger4/Rapgef4/Tnnt3/Abcg2/Egr2/Tnni2/Bves/Dsp/Tbxa2r/Unc13b/Nos3/Tnni1/Mecp2
GO:0046394	carboxylic acid biosynthetic process	36/1687	245/17970	0.00462402	Elovl6/Smpd3/Hacd2/Acot7/Mecr/Fpgs/Degs1/Enoph1/Kmo/Aldh1a1/Nags/Cth/Lta4h/Fads1/Prmt3/Gip/Per2/Pla2g5/Gls2/Elovl5/Amacr/Pycr1/Erlin1/Kynu/Edn2/Upb1/Cbs/Hacd1/Mgst2/Ptger4/Asns/Otc/Alox15/Shmt1/Psat1/Star
GO:0051926	negative regulation of calcium ion transport	10/1687	42/17970	0.00464273	Ppp2ca/Pawr/Hrc/Slc30a1/Gnb5/Nos1/1700034H15Rik/Gnao1/Pacsin3/Nos3
GO:0030258	lipid modification	31/1687	203/17970	0.00464957	Cpt2/Inpp5j/Hycc2/Lpcat3/Impa1/Tysnd1/Echdc1/Abca2/Pik3cg/Lonp2/Mboat2/Dgkq/Plpp5/Plppr1/Gbgt1/Hadhb/Mtmr7/Cpt1a/Ehhadh/Mtmr2/Sesn2/Spata6l/Soat2/Pip4p2/Nucb2/Lcat/B4galnt1/Sacm1l/Pik3r6/Fig4/Alox15
GO:0046474	glycerophospholipid biosynthetic process	18/1687	99/17970	0.00465297	Agpat4/Pgap3/Lpcat3/Pgap2/Pigv/Pik3cg/Dgkq/Pyurf/Slc27a1/Pigg/Pigl/Pla2g5/Pld1/Lcat/Lclat1/Alox15/Pla2g4c/Agpat5
GO:0099173	postsynapse organization	18/1687	99/17970	0.00465297	Wnt5a/Lrp4/Arf4/Nrp2/Ppp1r9a/Prmt3/Sptbn2/Sipa1l1/Ephb3/Lrfn4/Lrrc4b/Mtmr2/Ophn1/Adam10/Rapgef4/Srcin1/Abhd17b/Gphn
GO:0008211	glucocorticoid metabolic process	6/1687	18/17970	0.00467214	Ywhah/Dkk3/Dgkq/H6pd/Mecp2/Star
GO:0009301	snRNA transcription	6/1687	18/17970	0.00467214	Ell2/Uspl1/Ell3/Snapc4/Cc2d1a/Zfp143
GO:0045992	negative regulation of embryonic development	6/1687	18/17970	0.00467214	Wnt5a/Ctnnb1/Tbx2/Bmp4/Nrarp/Cdk20
GO:0046365	monosaccharide catabolic process	6/1687	18/17970	0.00467214	Eno1b/Il11ra2/Tigar/Glb1/Dhdh/Rbks
GO:0006091	generation of precursor metabolites and energy	49/1687	358/17970	0.00468404	Mtch2/Pgam1/Gaa/Cox7a1/Coa6/Hk1/Gm29667/Ndor1/Sdha/Gyg/Eno1b/Dnajc30/Chchd10/Uqcrc1/Cox6a1/Lyrm7/Ep300/Ino80dos/COX2/Ndufs6b/H6pd/Uqcrq/Ppp1cb/Ndufb9/Per2/Atp5d/Ppp1r3d/Wdr93/Tigar/Eno4/Adpgk/Atp5b/Etfrf1/Hkdc1/Ndufv3/Cox8b/Slc25a33/Gpd1/Gm6293/Gapdh/Uqcrb/Phkb/Pask/Cox4i1/Gm12070/Gm34303/Cox5b/Epm2aip1/COX1
GO:0009451	RNA modification	23/1687	138/17970	0.0047213	Nop2/Ctu1/Cmtr1/Zcchc4/Mrm2/Lcmt2/Mtfmt/Mto1/Trmt12/Pus1/Kti12/Tyw1/Trmt9b/Aars2/Pus10/Wtap/Tfb1m/Gm36279/Nsun4/Elp1/Bcdin3d/Trmt6/Trdmt1
GO:0008654	phospholipid biosynthetic process	24/1687	146/17970	0.00473264	Agpat4/Pgap3/Lpcat3/Pgap2/Pigv/Abca2/Gnpat/Fdps/Pik3cg/Mboat2/Dolk/Dgkq/Pyurf/Slc27a1/Pigg/Pigl/Pla2g5/Pld1/Nus1/Lcat/Lclat1/Alox15/Pla2g4c/Agpat5
GO:0015936	coenzyme A metabolic process	5/1687	13/17970	0.00490192	Acot7/Pank1/Nudt7/Pank4/Hmgcr
GO:0042182	ketone catabolic process	5/1687	13/17970	0.00490192	Cyp4f40/Kynu/Nqo2/Cyp4f18/Kyat3
GO:0072079	nephron tubule formation	5/1687	13/17970	0.00490192	Ctnnb1/Wnt9b/Sox8/Hnf1b/Grem1
GO:0090069	regulation of ribosome biogenesis	5/1687	13/17970	0.00490192	Riok2/Malsu1/Wdr75/Ythdf2/Utp15
GO:0016053	organic acid biosynthetic process	36/1687	246/17970	0.00494065	Elovl6/Smpd3/Hacd2/Acot7/Mecr/Fpgs/Degs1/Enoph1/Kmo/Aldh1a1/Nags/Cth/Lta4h/Fads1/Prmt3/Gip/Per2/Pla2g5/Gls2/Elovl5/Amacr/Pycr1/Erlin1/Kynu/Edn2/Upb1/Cbs/Hacd1/Mgst2/Ptger4/Asns/Otc/Alox15/Shmt1/Psat1/Star
GO:0000278	mitotic cell cycle	72/1687	567/17970	0.00501576	Ccnd1/Fbxo31/Phf8/Smpd3/Nme6/Poldip2/Myh10/Ctc1/Cdc25a/Ctnnb1/Ddx3x/Aurka/Dynlt1c/Ccni/Snx18/Bmp4/Cul4a/Mad1l1/Cenpa/Tubgcp4/Inhba/Riok2/Cenpf/Birc5/Dtl/Prc1/Nes/Spry2/Rec8/Zwint/Cdkn1b/Wapl/Zfp36l2/Cdkn1c/Smoc2/Klf11/Gm33950/Pdxp/Ticrr/Sapcd2/Spast/Togaram1/Thap1/Ndel1/Wac/Zfp655/Mzt1/Gm2788/E2f5/Cdh13/Cep55/Gm46764/Tnks/Spdl1/Ccne2/Nsl1/Cul7/Tcf19/Map3k20/Usp47/Foxc1/Xrcc3/2700099C18Rik/Togaram…
GO:0090257	regulation of muscle system process	26/1687	163/17970	0.00509243	Kcnq1/Arg2/Zc3h12a/Myocd/Rangrf/Fdps/Gucy1a1/Pawr/Hrc/Ep300/Hspb6/Nr4a1/Pkp2/Arhgap42/Edn2/Kcne3/Ada/Calcrl/Gper1/Ptger4/Tnnt3/Tnni2/Dsp/Tbxa2r/Nos3/Tnni1
GO:0010631	epithelial cell migration	29/1687	188/17970	0.0052432	Wnt5a/Zc3h12a/Eppk1/Ppm1f/Bmp4/Tac1/Dcn/Pik3cg/Sh3bp1/Atoh8/Patz1/Adgra2/Rin2/Nr4a1/Smoc2/Pkn3/Nus1/Epha2/Atp5b/Cdh13/Dock1/Wdpcp/Grem1/Spred1/Tgfbr1/Tbxa2r/Nos3/Mecp2/Egr3
GO:0043243	positive regulation of protein-containing complex disassembly	7/1687	24/17970	0.00524457	Nes/Pdxp/Irgm2/Spast/Jmjd4/F2rl1/Fyco1
GO:0000902	cell morphogenesis	83/1687	670/17970	0.00527282	Ywhah/Parva/Fbxo31/Wnt5a/Cldn3/Itga8/Ctnnb1/Dab1/Lrp4/Cyfip1/Wtip/Aurka/Rims2/Lamb2/Zmym3/Raph1/Lama1/Shroom1/Tyro3/Nes/Nrp2/Ep300/Prkn/Sema6c/Ppp1r9a/Col15a1/Slc39a3/Arhgap15/Prmt3/Sema4f/Sipa1l1/Amigo1/Cpne9/Larp4/Ephb3/Fstl4/Ift56/Bcl6/Spast/Aatk/Draxin/Tmem106b/Lamb3/Sec24b/Map3k13/Mapt/Reg1/Epha2/Ythdf2/Dock1/Gm46764/Wdpcp/Postn/Lgr4/Pak6/Wdr36/Ophn1/Ss18l1/Cul7/Grem1/Nptn/Slc23a2/Adam10/Cap…
GO:0000904	cell morphogenesis involved in differentiation	60/1687	459/17970	0.00534742	Ywhah/Parva/Fbxo31/Wnt5a/Cldn3/Itga8/Ctnnb1/Dab1/Lrp4/Cyfip1/Lamb2/Raph1/Lama1/Tyro3/Nrp2/Ep300/Sema6c/Ppp1r9a/Col15a1/Prmt3/Sema4f/Sipa1l1/Amigo1/Ephb3/Fstl4/Ift56/Spast/Aatk/Draxin/Tmem106b/Lamb3/Sec24b/Map3k13/Mapt/Epha2/Ythdf2/Dock1/Gm46764/Wdpcp/Postn/Lgr4/Wdr36/Ophn1/Ss18l1/Cul7/Nptn/Adam10/Akip1/Adnp/Adcy1/Srcin1/Fbxo45/Slitrk4/Egr2/Abitram/Dpysl2/Megf8/Bves/Olfm4/Zfyve27
GO:0007005	mitochondrion organization	50/1687	370/17970	0.00553669	Mtch2/Mtfp1/Cox7a1/Miga2/Poldip2/Atg2b/Fmc1/Aurka/Mgme1/Ndufaf3/Zfp13/Timm9/Dcn/Chchd10/Uqcrc1/Ndufab1/Timm17b/Uqcc6/Ndufs5-ps/Lyrm7/Ep300/Gm30251/Prkn/Mrpl15/Ndufs6b/Samm50/Adck1/Myo19/Ndufb9/Atp5d/Bnip3l-ps/Tigar/Eya2/Mapt/Usp30/Mief1/Rhot1/Yme1l1/Gm20604/Sesn2/Ndufa1/Nubpl/Immt/Slc25a33/Dnm1l/Gper1/Septin4/Hspa1l/Pif1/Ndufc1
GO:0010648	negative regulation of cell communication	112/1687	945/17970	0.00556313	Gdpd5/Rnf213/Hspa5/Pdx1/Wnt5a/Rph3al/Egr1/Kcnq1/Rnf34/Ctnnb1/Ddx3x/Dab1/Lrp4/Zc3h12a/Kptn/Wtip/Dynlt1c/Ppia/Wwox/Ltf/Fgf9/Dkk3/Bmp4/Kcnb1/Myocd/Sesn3/Adm/Dcn/Nrarp/Cd2ap/Sh3bp1/Ror2/Ywhab/Dkk2/Bmal1/Slc30a7/Ltbp1/Casp8/Cth/Map3k7/Adgra2/Pawr/Tyro3/Spry2/Vnn1/Slc30a1/Plekha1/Trim72/Prkn/Ppp1r9a/Arhgap42/Nos1/Meis3/H2bc21/Ell3/Fstl4/Bcl6/Draxin/Mvp/Rita1/Sgk3/1700034H15Rik/Eya2/Mtmr2/Snora73b/Mapt/…
GO:0003205	cardiac chamber development	21/1687	124/17970	0.00559104	Parva/Wnt5a/Tab1/Tbx2/Fgf9/Bmp4/Myocd/Ccn1/Ppp2ca/Luzp1/Ltbp1/Nrp2/Chd7/Pitx2/Pkp2/Stra6/Foxc1/Tgfbr1/Dsp/Nos3/Tnni1
GO:0043632	modification-dependent macromolecule catabolic process	60/1687	460/17970	0.00560289	Rnf213/Fbxo31/Hspa5/Edem1/Rnf128/Rnf34/Ctnnb1/Aurka/Dnajc10/Ubr3/Cul4a/Dda1/Usp1/Psma4/Cd2ap/Rmnd5a/Rnf4/Bmal1/Gm9836/Dtl/Caml/Usp15/Usp43/Trim72/Psmd6/Prkn/Ntan1/Peli1/Csnk2a1-ps3/Fbxo33/Uchl5/Usp22/Cul1/Erlin1/Wac/Uchl1/Wfs1/Mylip/Usp30/Dcst1/Sh3rf2/Tnfaip3/Styx/Klhl42/Ubqln2/Fbxo38/Cul7/Rad23a/Rnf146/Edem2/Ubap1/Usp47/Sgtb/Fbxo45/Otud7a/Rnf103/Ubxn11/Ankzf1/Usp14/Psma5
GO:0032787	monocarboxylic acid metabolic process	66/1687	515/17970	0.00570436	Cpt2/Elovl6/Mtch2/Pgam1/Cyp4f40/Hacd2/Acot7/Pdhx/Mecr/Hk1/Gm29667/Tysnd1/Mpc1/Degs1/Echdc1/Lypla1/Gnpat/Acadsb/Kmo/Aldh1a1/Eno1b/Lonp2/Grhpr/Nudt7/Cyp2t4/Vnn1/Ep300/Hpgd/Slc27a1/Hadhb/Fads1/Prmt3/Ndufs6b/Gip/Cpt1a/Hal/4833422C13Rik/Aldh5a1/Per2/Ehhadh/Tigar/Elovl5/Amacr/Eno4/Acot4/Erlin1/Kynu/Peds1/Edn2/Ldhd/Adpgk/Hkdc1/Sesn2/Cyp4f18/Gpd1/Nucb2/Gapdh/Hacd1/Crabp1/Lpin1/Gm12070/Acot2/Asns/Alox15/G…
GO:0072527	pyrimidine-containing compound metabolic process	13/1687	64/17970	0.00584116	Agpat4/Uck2/Nme6/Entpd4/Entpd4b/Gm5867/Nme7/Dctd/Upb1/Dck/Lclat1/Dhodh/Agpat5
GO:0008652	cellular amino acid biosynthetic process	12/1687	57/17970	0.00589537	Enoph1/Aldh1a1/Nags/Cth/Gls2/Pycr1/Upb1/Cbs/Asns/Otc/Shmt1/Psat1
GO:0022604	regulation of cell morphogenesis	45/1687	327/17970	0.0059148	Ywhah/Parva/Fbxo31/Wnt5a/Cldn3/Dab1/Lrp4/Cyfip1/Wtip/Rims2/Zmym3/Ep300/Prkn/Sema6c/Ppp1r9a/Arhgap15/Sipa1l1/Amigo1/Cpne9/Larp4/Ephb3/Fstl4/Aatk/Draxin/Map3k13/Mapt/Reg1/Dock1/Gm46764/Wdpcp/Postn/Wdr36/Ss18l1/Cul7/Slc23a2/Adam10/Adnp/Sh3kbp1/Srcin1/Dpysl2/Megf8/Bves/Olfm4/Zfyve27/Mecp2
GO:0023057	negative regulation of signaling	112/1687	947/17970	0.00593158	Gdpd5/Rnf213/Hspa5/Pdx1/Wnt5a/Rph3al/Egr1/Kcnq1/Rnf34/Ctnnb1/Ddx3x/Dab1/Lrp4/Zc3h12a/Kptn/Wtip/Dynlt1c/Ppia/Wwox/Ltf/Fgf9/Dkk3/Bmp4/Kcnb1/Myocd/Sesn3/Adm/Dcn/Nrarp/Cd2ap/Sh3bp1/Ror2/Ywhab/Dkk2/Bmal1/Slc30a7/Ltbp1/Casp8/Cth/Map3k7/Adgra2/Pawr/Tyro3/Spry2/Vnn1/Slc30a1/Plekha1/Trim72/Prkn/Ppp1r9a/Arhgap42/Nos1/Meis3/H2bc21/Ell3/Fstl4/Bcl6/Draxin/Mvp/Rita1/Sgk3/1700034H15Rik/Eya2/Mtmr2/Snora73b/Mapt/…
GO:0007269	neurotransmitter secretion	19/1687	109/17970	0.00594954	Rims2/Kmo/Slc30a1/Nr4a1/Prkn/Ppp1r9a/Syp/Sptbn2/1700034H15Rik/Rab5a/Rhot1/Gper1/Ptger4/Adcy1/Kcnc3/Gm31336/Cadps2/Sv2a/Unc13b
GO:0099643	signal release from synapse	19/1687	109/17970	0.00594954	Rims2/Kmo/Slc30a1/Nr4a1/Prkn/Ppp1r9a/Syp/Sptbn2/1700034H15Rik/Rab5a/Rhot1/Gper1/Ptger4/Adcy1/Kcnc3/Gm31336/Cadps2/Sv2a/Unc13b
GO:1903522	regulation of blood circulation	26/1687	165/17970	0.00598952	Gaa/Kcnq1/Mmp2/Zc3h12a/Tbx2/Tac1/Rangrf/Adm/Hrc/Myl4/Pkp2/Ptger2/Arhgap42/Nos1/Popdc2/Per2/Slc4a3/Edn2/Gnao1/Kcne3/Ada/F2rl1/Bves/Dsp/Tbxa2r/Nos3
GO:0031344	regulation of cell projection organization	63/1687	489/17970	0.00606498	Ywhah/Fbxo31/Hspa5/Wnt5a/Katna1/Dab1/Lrp4/Cyfip1/Dynlt1c/Rims2/Bmp4/Ror2/Cep135/Spry2/Ep300/Prkn/Sema6c/Ppp1r9a/Pcp4/Sipa1l1/Amigo1/Cpne9/Ephb3/Fstl4/Aatk/Draxin/Tmem106b/Map3k13/Pld1/Mapt/Rab5a/Mylip/Reg1/Epha2/Gm46764/Wdpcp/Vdac3/Odf2l/Wdr36/Ss18l1/Cul7/Ttbk2/Nptn/Tbc1d30/Slc23a2/Adam10/F2rl1/Zmynd10/Adnp/Rapgef4/Srcin1/Abhd17b/Avil/Abitram/Cntn1/Dock11/Dpysl2/Megf8/Tgfbr1/Mns1/Zfyve27/Cbfa2t2/…
GO:0050770	regulation of axonogenesis	20/1687	117/17970	0.0060695	Wnt5a/Dab1/Lrp4/Cyfip1/Ep300/Sema6c/Sipa1l1/Amigo1/Ephb3/Fstl4/Aatk/Draxin/Map3k13/Mapt/Gm46764/Wdr36/Adnp/Dpysl2/Megf8/Zfyve27
GO:0090132	epithelium migration	29/1687	190/17970	0.0060895	Wnt5a/Zc3h12a/Eppk1/Ppm1f/Bmp4/Tac1/Dcn/Pik3cg/Sh3bp1/Atoh8/Patz1/Adgra2/Rin2/Nr4a1/Smoc2/Pkn3/Nus1/Epha2/Atp5b/Cdh13/Dock1/Wdpcp/Grem1/Spred1/Tgfbr1/Tbxa2r/Nos3/Mecp2/Egr3
GO:0071774	response to fibroblast growth factor	15/1687	79/17970	0.006191	Fgf1/Wnt5a/Ctnnb1/Fgf9/Spry2/Fgfr3/Elk1/Nr4a1/Zfp36l2/Smoc2/Postn/Nptn/Dstyk/Star/Egr3
GO:0046700	heterocycle catabolic process	54/1687	408/17970	0.00620289	Nudt1/Prodh/Acot7/Zc3h12a/Entpd4/Kmo/Dhx34/Skic3/Exosc4/Gm46829/Nudt7/Gtpbp1/Entpd4b/Gm31349/Itpa/Dcps/Zfp36l2/Gm36787/Pde8b/Pdxp/Gm54336/Isg20/Hal/Patl1/Nt5e/Gm16702/Kynu/Gm36375/Gm41608/Exosc8/Upb1/Ythdf2/Entpd1/Tent5c/Ada/Gm36279/Hnrnpa0/Nbdy/Smpdl3a/Parn/Pnrc2/Gm42245/Prr5l/Zc3h14/Exog/Polr2d/Fen1/Dffb/Dcp2/Enpp5/Rnaseh2c/Trdmt1/Gm41450/Gm52783
GO:0120039	plasma membrane bounded cell projection morphogenesis	54/1687	408/17970	0.00620289	Ywhah/Fbxo31/Wnt5a/Ctnnb1/Dab1/Lrp4/Cyfip1/Aurka/Rims2/Lamb2/Raph1/Lama1/Nrp2/Ep300/Prkn/Sema6c/Ppp1r9a/Prmt3/Sema4f/Sipa1l1/Amigo1/Cpne9/Ephb3/Fstl4/Spast/Aatk/Draxin/Tmem106b/Map3k13/Mapt/Reg1/Epha2/Gm46764/Postn/Lgr4/Pak6/Wdr36/Ss18l1/Cul7/Nptn/Slc23a2/Adam10/Adnp/Adcy1/Srcin1/Fbxo45/Slitrk4/Egr2/Abitram/Sh3gl2/Dpysl2/Megf8/Zfyve27/Mecp2
GO:1902903	regulation of supramolecular fiber organization	41/1687	293/17970	0.00628013	Tmsb4x/Cyfip1/Tmod3/Gm13612/Ppm1f/Slain2/Tac1/Rangrf/Sh3bp1/Eps8/Mid1/Ep300/Cdkn1b/Prkn/Ppp1r9a/Sptbn2/Gm52861/Pdxp/Sh3pxd2b/Arhgap6/Spast/Togaram1/Limch1/Pde4dip/Mapt/Capza2/Ttbk2/F2rl1/Mapre1/Plekhh2/Ptger4/Avil/Abitram/Wasl/Alox15/Gm40363/Gm53330/Tgfbr1/Synpo2/Actr3/Mecp2
GO:0033081	regulation of T cell differentiation in thymus	6/1687	19/17970	0.00629354	Bmp4/Vnn1/Zfp608/Ada/Egr3/Zeb1
GO:0051222	positive regulation of protein transport	30/1687	199/17970	0.00638059	Edem1/Pdx1/Rph3al/Myh10/Zc3h12a/Wipf1/Ppia/Kcnb1/Riok2/Exph5/Cd2ap/Gpr27/Ep300/Pcm1/Prkn/Gip/Tmem30b/Mief1/Mavs/Ctdspl2/F2rl1/Edem2/Gper1/Ptger4/Rapgef4/Prr5l/Hspa1l/Tmed10-ps/Unc13b/Cep290
GO:0032989	cellular component morphogenesis	90/1687	741/17970	0.00646281	Ywhah/Parva/Fbxo31/Krt19/Wnt5a/Poldip2/Cldn3/Itga8/Ctnnb1/Dab1/Lrp4/Cyfip1/Wtip/Aurka/Rims2/Lamb2/Gnpat/Zmym3/Raph1/Lama1/Shroom1/Tyro3/Nes/Nrp2/Ep300/Prkn/Sema6c/Ppp1r9a/Col15a1/Slc39a3/Arhgap15/Prmt3/Sema4f/Sipa1l1/Ndufs6b/Itgb4/Amigo1/Cpne9/Larp4/Ephb3/Fstl4/Ift56/Bcl6/Spast/Aatk/Draxin/Tmem106b/Lamb3/Sec24b/Map3k13/Mtmr2/Mapt/Reg1/Epha2/Ythdf2/Dock1/Gm46764/Wdpcp/Postn/Lgr4/Pak6/Wdr36/Ophn1/S…
GO:0014070	response to organic cyclic compound	81/1687	657/17970	0.00654311	Ywhah/Hspa5/Pdx1/Nasp/Egr1/Kcnq1/Ctnnb1/Mmp2/Zc3h12a/Bmp4/Abca2/Inhba/Tac1/Adm/Pik3cg/Ppp2ca/Lonp2/Ifit1bl2/Pdia3/Rnf4/Bmal1/Dgkq/Sp5/Slc26a6/P2rx6/Igfbp2/Mn1/Ep300/Hpgd/Ifit3/Cdkn1b/Elk1/Fads1/Zfp36l2/Peli1/Gnb5/Ptger2/Nos1/Pdxp/Csnk2a1-ps3/Wfdc1/Gip/Cpt1a/Scnn1a/Pla2g5/Il18/Smad9/Gm32340/Hnf1b/Slc26a3/Reg1/Gnao1/Abca3/Mavs/Postn/Aqp8/Ada/Gpd1/Lcat/Cd83/Gper1/Lbh/Bche/Adcy1/Abcg2/Casp1/Ifit1bl1/…
GO:0072210	metanephric nephron development	8/1687	31/17970	0.00655449	Egr1/Ctnnb1/Bmp4/Lamb2/Wnt9b/Sox8/Lgr4/Grem1
GO:0097484	dendrite extension	8/1687	31/17970	0.00655449	Cyfip1/Rims2/Prkn/Cpne9/Reg1/Slc23a2/Sh3gl2/Mecp2
GO:0060976	coronary vasculature development	10/1687	44/17970	0.00659213	Tab1/Fgf9/Bmp4/Myocd/Ltbp1/Sec24b/Gper1/Spred1/Megf8/Tgfbr1
GO:0017062	respiratory chain complex III assembly	4/1687	9/17970	0.00662636	Uqcrc1/Uqcc6/Lyrm7/Slc25a33
GO:0030540	female genitalia development	4/1687	9/17970	0.00662636	Wnt5a/Tyro3/Chd7/Stra6
GO:0034551	mitochondrial respiratory chain complex III assembly	4/1687	9/17970	0.00662636	Uqcrc1/Uqcc6/Lyrm7/Slc25a33
GO:0042363	fat-soluble vitamin catabolic process	4/1687	9/17970	0.00662636	Cyp4f40/Cyp4f18/Crabp1/Gm32342
GO:0046929	negative regulation of neurotransmitter secretion	4/1687	9/17970	0.00662636	Slc30a1/Prkn/Ppp1r9a/1700034H15Rik
GO:0051194	positive regulation of cofactor metabolic process	4/1687	9/17970	0.00662636	Zfp13/Duoxa2/COX2/Clybl
GO:0090141	positive regulation of mitochondrial fission	4/1687	9/17970	0.00662636	Aurka/Dcn/Prkn/Mief1
GO:1904294	positive regulation of ERAD pathway	4/1687	9/17970	0.00662636	Edem1/Ubqln2/Edem2/Rnft1
GO:1904526	regulation of microtubule binding	4/1687	9/17970	0.00662636	Ppp2ca/Gas8/Ttbk2/Mapre1
GO:1905331	negative regulation of morphogenesis of an epithelium	4/1687	9/17970	0.00662636	Wnt5a/Ctnnb1/Tbx2/Bmp4
GO:0001510	RNA methylation	13/1687	65/17970	0.00668895	Nop2/Cmtr1/Zcchc4/Mrm2/Lcmt2/Trmt12/Wtap/Tfb1m/Gm36279/Nsun4/Bcdin3d/Trmt6/Trdmt1
GO:1901605	alpha-amino acid metabolic process	38/1687	268/17970	0.00669753	Prodh/Arg2/Fpgs/Enoph1/Acadsb/Kmo/Nags/Cth/Gm46829/Ddah1/Gm31349/Agmat/Gm9199/Gm36787/Nos1/Gm54336/Hal/Aldh5a1/Gls2/Gm16702/Pycr1/Kynu/Gm36375/Gm41608/Mmut/Cbs/Gm36279/Ddah2/Kyat3/Gm42245/Asns/Otc/Shmt1/Dglucy/Psat1/Nos3/Mecp2/Gm41450
GO:0031116	positive regulation of microtubule polymerization	7/1687	25/17970	0.00670377	Slain2/Cdkn1b/Togaram1/Pde4dip/Mapt/Mapre1/Mecp2
GO:0110111	negative regulation of animal organ morphogenesis	7/1687	25/17970	0.00670377	Wnt5a/Ctnnb1/Tbx2/Bmp4/Hnf1b/Grem1/Foxc1
GO:1901985	positive regulation of protein acetylation	7/1687	25/17970	0.00670377	Ddx3x/Bmal1/Ep300/Cep295/Nos1/Fam161a/Terf2ip
GO:1905114	cell surface receptor signaling pathway involved in cell-cell signaling	47/1687	347/17970	0.00670476	Rnf213/Leo1/Wnt5a/Frat1/Egr1/Ctnnb1/Ddx3x/Lrp4/Rims2/Wwox/Fgf9/Dkk3/Bmp4/Igsf9b/Nrarp/Ror2/Dkk2/Bmal1/Adgra2/Tcf7l1/Pitx2/Prkn/Ppp1r9a/Frat2/Zbed3/Wnt9b/Tmem198b/Csnk2a1-ps3/Begain/Draxin/Hnf1b/Mtmr2/Rab5a/Tnfaip3/Tnks/Lgr4/Wnt5b/Grem1/Rnf146/Atp6ap2/Usp47/Rspo1/Rspo3/Prkaa2/Unc13b/Gm31391/Mecp2
GO:0043542	endothelial cell migration	23/1687	142/17970	0.00672232	Wnt5a/Zc3h12a/Bmp4/Dcn/Pik3cg/Sh3bp1/Atoh8/Patz1/Adgra2/Rin2/Nr4a1/Smoc2/Nus1/Epha2/Atp5b/Cdh13/Grem1/Spred1/Tgfbr1/Tbxa2r/Nos3/Mecp2/Egr3
GO:0060047	heart contraction	22/1687	134/17970	0.00674688	Gaa/Kcnq1/Zc3h12a/Tbx2/Tac1/Rangrf/Adm/Hrc/Myl4/Pkp2/Nos1/Popdc2/Slc4a3/Edn2/Gnao1/Kcne3/Ada/Tnni2/Bves/Dsp/Nos3/Tnni1
GO:0005975	carbohydrate metabolic process	66/1687	519/17970	0.00678056	Mtch2/Pgam1/Gaa/Smpd3/Edem1/Pdx1/Sis/Kcnq1/Hk1/Sord/Impa1/Gm29667/Man1a/Ppip5k1/Gyg/B4galt2/Eno1b/Gm46840/Dgkq/Slc5a3/Ep300/Gbgt1/Prkn/Il11ra2/Galk2/Gk/H6pd/Pdxp/Uevld/Ppp1cb/Cpt1a/Fam3a/G6pc3/Per2/Ppp1r3d/Tigar/Eno4/Mtmr2/Slc3a2/Adpgk/Hkdc1/Sesn2/Pfkfb2/Pgm3/Slc23a2/Gpd1/Pygl/Gapdh/Gdpgp1/Edem2/Gper1/Mogat2/Phkb/Ptger4/Abcg2/Pask/Glb1/Gm12070/Dhdh/Rbks/Mgam/Pfkfb3/Epm2aip1/Mecp2/Supt20/B4galt4
GO:0006644	phospholipid metabolic process	43/1687	312/17970	0.00683211	Agpat4/Smpd3/Inpp5j/Acp6/Pgap3/Hycc2/Lpcat3/Impa1/Pgap2/Pigv/Abca2/Gnpat/Fdps/Pik3cg/Mboat2/Dolk/Dgkq/Pyurf/Plpp5/Plppr1/Fgfr3/Slc27a1/Pigg/Pigl/Mtmr7/Pdxp/Pla2g5/Pld1/Pik3r5/Mtmr2/Nus1/Abca3/Pip4p2/Lcat/Lclat1/Sacm1l/Pik3r6/Fig4/Alox15/Serinc2/Pla2g4c/Mecp2/Agpat5
GO:0045944	positive regulation of transcription by RNA polymerase II	96/1687	800/17970	0.00702031	Hmga1b/Cavin2/Pdx1/Leo1/Wnt5a/Egr1/Batf/Itga8/Ctnnb1/Ddx3x/Zc3h12a/Lpcat3/Zfp292/Wwox/Bmp4/Myocd/Ccn1/Inhba/Camta1/Pou2af1/Arf4/Dcn/Ell2/Atoh8/Rnf4/Bmal1/Patz1/Gm9836/Bmp3/Slc30a7/Ccpg1/Hoxb3/Ep300/Chd7/Pitx2/Tcf15/Creb3l2/Ssbp2/Elk1/Nr4a1/Prkn/Prdm10/Arid4a/Elf3/Smarca2/Zfp521/Zbed3/Nufip1/Peg3/Zscan21/Nos1/Meis3/Ell3/Six5/Ercc6/Il18/Yy2/Dcaf6/Dpf1/Mtf2/Sox8/Hnf1b/Erlin1/Ier5/Mettl23/Npas2/Gm278…
GO:0008015	blood circulation	46/1687	339/17970	0.00702165	Gaa/Smpd3/Kcnq1/Mmp2/Zc3h12a/Tbx2/Tac1/Rangrf/Adm/Qrfp/Gucy1a1/Hrc/Klk1/Chd7/Ddah1/Npy/Adrb3/Myl4/Pkp2/Ptger2/Arhgap42/Nos1/Popdc2/Per2/Il18/Slc4a3/Edn2/Gnao1/Postn/Cyp4f18/Kcne3/Ada/Erap1/F2rl1/Atp6ap2/Gper1/Foxc1/Pde3a/Tnni2/Bves/Dsp/Tbxa2r/Nos3/Gpr4/Tnni1/Mecp2
GO:0061217	regulation of mesonephros development	5/1687	14/17970	0.00704225	Bmp4/Sox8/Hnf1b/Lgr4/Grem1
GO:0072077	renal vesicle morphogenesis	5/1687	14/17970	0.00704225	Ctnnb1/Bmp4/Wnt9b/Sox8/Grem1
GO:0090189	regulation of branching involved in ureteric bud morphogenesis	5/1687	14/17970	0.00704225	Bmp4/Sox8/Hnf1b/Lgr4/Grem1
GO:1901569	fatty acid derivative catabolic process	5/1687	14/17970	0.00704225	Cyp4f40/Acot7/Nudt7/Hpgd/Cyp4f18
GO:1904357	negative regulation of telomere maintenance via telomere lengthening	5/1687	14/17970	0.00704225	Ctc1/Terf1/Tnks/Dcp2/Pif1
GO:0006003	fructose 2,6-bisphosphate metabolic process	3/1687	5/17970	0.00714257	Tigar/Pfkfb2/Pfkfb3
GO:0051775	response to redox state	3/1687	5/17970	0.00714257	Smpd3/Bmal1/Npas2
GO:0071608	macrophage inflammatory protein-1 alpha production	3/1687	5/17970	0.00714257	Arg2/Mcoln2/Sirpa
GO:0071640	regulation of macrophage inflammatory protein 1 alpha production	3/1687	5/17970	0.00714257	Arg2/Mcoln2/Sirpa
GO:0097151	positive regulation of inhibitory postsynaptic potential	3/1687	5/17970	0.00714257	Rims2/Igsf9b/Unc13b
GO:0098828	modulation of inhibitory postsynaptic potential	3/1687	5/17970	0.00714257	Rims2/Igsf9b/Unc13b
GO:1901523	icosanoid catabolic process	3/1687	5/17970	0.00714257	Cyp4f40/Hpgd/Cyp4f18
GO:1901662	quinone catabolic process	3/1687	5/17970	0.00714257	Cyp4f40/Nqo2/Cyp4f18
GO:2000389	regulation of neutrophil extravasation	3/1687	5/17970	0.00714257	Pawr/Ptger4/Fut7
GO:0070201	regulation of establishment of protein localization	52/1687	393/17970	0.00717475	Edem1/Pdx1/Rph3al/Kcnq1/Myh10/Zc3h12a/Wipf1/Ppia/Ppm1f/Bmp4/Kcnb1/Riok2/Exph5/Cd2ap/Ppp2ca/Birc5/Bmal1/Gpr27/Cep135/Ep300/Pcm1/Prkn/Cep295/Nos1/Gip/Cpt1a/Per2/Bnip3l-ps/Tmem30b/Terf1/Cct4/Gm32340/Mapt/Mief1/Mavs/Ophn1/Ctdspl2/Ica1/F2rl1/2700049A03Rik/Edem2/Jagn1/Gper1/Ptger4/Rapgef4/Prr5l/Hspa1l/Tmed10-ps/Hmgn3/Dnaja1/Unc13b/Cep290
GO:0009968	negative regulation of signal transduction	100/1687	839/17970	0.00727466	Gdpd5/Rnf213/Hspa5/Pdx1/Wnt5a/Rph3al/Egr1/Rnf34/Ctnnb1/Ddx3x/Dab1/Lrp4/Zc3h12a/Kptn/Wtip/Dynlt1c/Ppia/Wwox/Ltf/Fgf9/Dkk3/Bmp4/Myocd/Sesn3/Adm/Dcn/Nrarp/Cd2ap/Sh3bp1/Ror2/Ywhab/Dkk2/Bmal1/Slc30a7/Ltbp1/Casp8/Cth/Map3k7/Adgra2/Pawr/Tyro3/Spry2/Vnn1/Plekha1/Trim72/Prkn/Arhgap42/Meis3/H2bc21/Ell3/Fstl4/Bcl6/Draxin/Mvp/Rita1/Sgk3/Eya2/Mtmr2/Snora73b/Wfs1/Tnfaip8l1/Epha2/Ythdf2/Faim2/Dcst1/Sh3rf2/Tnfai…
GO:0120035	regulation of plasma membrane bounded cell projection organization	62/1687	484/17970	0.00728033	Ywhah/Fbxo31/Hspa5/Wnt5a/Katna1/Dab1/Lrp4/Cyfip1/Dynlt1c/Rims2/Bmp4/Ror2/Cep135/Ep300/Prkn/Sema6c/Ppp1r9a/Pcp4/Sipa1l1/Amigo1/Cpne9/Ephb3/Fstl4/Aatk/Draxin/Tmem106b/Map3k13/Pld1/Mapt/Rab5a/Mylip/Reg1/Epha2/Gm46764/Wdpcp/Vdac3/Odf2l/Wdr36/Ss18l1/Cul7/Ttbk2/Nptn/Tbc1d30/Slc23a2/Adam10/F2rl1/Zmynd10/Adnp/Rapgef4/Srcin1/Abhd17b/Avil/Abitram/Cntn1/Dock11/Dpysl2/Megf8/Tgfbr1/Mns1/Zfyve27/Cbfa2t2/Mecp2
GO:0080134	regulation of response to stress	116/1687	992/17970	0.00731082	Hmga1b/Mtch2/Hspa5/Edem1/Pdx1/Wnt5a/Cldn3/Ctnnb1/Ddx3x/Arg2/Zc3h12a/Eppk1/Lpcat3/Ppia/Ltf/Cul4a/Sesn3/Tac1/Slc30a10/Gpx2/Usp1/Pik3cg/Slc38a2/Duoxa2/Smyd2/Ror2/Map3k21/Ifit1bl2/Bmal1/Unc5cl/Casp8/Traf3/Map3k7/Pawr/Tyro3/Mid1/Vnn1/Reg3a/Ddah1/Cdkn1b/Prkn/Nbr1/Mturn/Meak7/Smoc2/Pglyrp1/Peli1/Ell3/Il22ra2/Wfdc1/Irgm2/Ier3/Bcl6/Nt5e/Serpinb1a/Ercc6/Map3k13/Fgl2/Ddx11/Tigar/Eya2/Ier5/Mapt/Wfs1/Il20rb/Y…
GO:0046928	regulation of neurotransmitter secretion	14/1687	73/17970	0.00733189	Rims2/Kmo/Slc30a1/Prkn/Ppp1r9a/Syp/1700034H15Rik/Rab5a/Rhot1/Gper1/Ptger4/Adcy1/Kcnc3/Unc13b
GO:0010769	regulation of cell morphogenesis involved in differentiation	30/1687	201/17970	0.00735068	Ywhah/Fbxo31/Wnt5a/Dab1/Lrp4/Cyfip1/Ep300/Sema6c/Ppp1r9a/Sipa1l1/Amigo1/Ephb3/Fstl4/Aatk/Draxin/Map3k13/Mapt/Dock1/Gm46764/Postn/Wdr36/Ss18l1/Cul7/Adam10/Adnp/Srcin1/Dpysl2/Megf8/Olfm4/Zfyve27
GO:0032269	negative regulation of cellular protein metabolic process	80/1687	651/17970	0.00742206	Lamtor5/Rnf34/Ctnnb1/Ddx3x/Zc3h12a/Dynlt1c/Mgat5/Dnajc10/Ppia/Ppm1f/Ltf/Bmp4/Myocd/Malsu1/Naip1/Ppp2ca/Ywhab/Birc5/Shfl/Hexim2/Dgkq/Spry2/Caml/Ep300/Cdkn1b/Nr4a1/Prkn/Zfp36l2/Cdkn1c/Prmt3/Zbed3/Pcp4/Nos1/Csnk2a1-ps3/Caprin1/Patl1/Mvp/Per2/Serpinb1a/Uchl5/Il18/Mtf2/Wac/Mapt/Ythdf2/Crtap/Sh3rf2/Tnfaip3/Tmem98/Marchf7/Sesn2/Styx/Msx3/Ophn1/Grem1/Laptm4b/F2rl1/Serpina3g/Ago4/Ncoa7/Pwp1/Gper1/Usp47/Si…
GO:0090130	tissue migration	29/1687	193/17970	0.00757003	Wnt5a/Zc3h12a/Eppk1/Ppm1f/Bmp4/Tac1/Dcn/Pik3cg/Sh3bp1/Atoh8/Patz1/Adgra2/Rin2/Nr4a1/Smoc2/Pkn3/Nus1/Epha2/Atp5b/Cdh13/Dock1/Wdpcp/Grem1/Spred1/Tgfbr1/Tbxa2r/Nos3/Mecp2/Egr3
GO:0032543	mitochondrial translation	13/1687	66/17970	0.00763148	Rmnd1/Mrps34/Gfm2/Malsu1/Mrpl47/Mrpl16/Mrpl44/Gatc/Aars2/Mief1/Mrps2/LOC115488500/Nsun4
GO:0046486	glycerolipid metabolic process	40/1687	288/17970	0.00779312	Agpat4/Inpp5j/Acp6/Pgap3/Hycc2/Lpcat3/Impa1/Pgap2/Pigv/Gnpat/Pik3cg/Mboat2/Dgkq/Pyurf/Slc27a1/Pigg/Pigl/Mtmr7/Pdxp/Cpt1a/Pla2g5/Pld1/Mtmr2/Abca3/Pip4p2/Gpd1/Lcat/Mogat2/Lpin1/Avil/Lclat1/Sacm1l/Pik3r6/Fig4/Alox15/Serinc2/Cnep1r1/Pla2g4c/Mecp2/Agpat5
GO:1901137	carbohydrate derivative biosynthetic process	63/1687	495/17970	0.00788551	Adcy6/Elovl6/Smpd3/Uck2/Nme6/Acot7/Pgap3/Pdhx/Galnt1/Ampd2/Ctnnb1/Pomt2/Mgat5/Pgap2/Pigv/Mpc1/Abca2/St3gal2/B4galt2/Dnajc30/Pank1/Gucy1a1/Pyurf/Pomt1/Pawr/Lcmt2/Ep300/Gbgt1/Prkn/Pigg/Pigl/St6galnac3/Pank4/COX2/Alg1/Galnt11/Nt5e/Gm6581/Atp5d/Pxylp1/Elovl5/Tyw1/Ext1/Nme7/Adss/Ampd3/Nus1/Ldhd/Tmem165/Atp5b/Entpd1/Adcy4/Pgm3/Ada/St3gal5/Ptger4/Adcy1/Fut7/Ddost/B4galnt1/Dhodh/Large2/B4galt4
GO:0031401	positive regulation of protein modification process	101/1687	851/17970	0.00789315	Ccnd1/Hspa5/Wnt5a/Tab1/Egr1/Cldn3/Ctnnb1/Ddx3x/Dab1/Lrp4/Pomt2/Zc3h12a/Ppia/Ccnq/Ltf/Uba2/Fgf9/Bmp4/Ccn1/Inhba/Slc30a10/Bnip2/Camta1/Cdca2/Pik3cg/Ppp2ca/Ror2/Map3k21/Bmal1/Avpi1/Gpr55/Bmp3/Dgkq/Unc5cl/Traf3/Map3k7/Ccl8/Pomt1/Pawr/Mid1/Spry2/Ep300/Fgfr3/Cdkn1b/Prkn/Slc27a1/Adrb3/Ppp1r9a/Cep295/Ccl20/Mturn/Ccl9/Prlr/Peli1/Nos1/Irgm2/Bcl6/Ercc6/Il18/Map3k13/Arrdc4/Mtf2/Limch1/Pik3r5/Nqo2/Wfs1/Cd27/C…
GO:0031050	dsRNA processing	8/1687	32/17970	0.00803464	Zc3h12a/Bmp4/Myocd/Mrpl44/Pus10/Prkra/Bcdin3d/Mecp2
GO:0070918	production of small RNA involved in gene silencing by RNA	8/1687	32/17970	0.00803464	Zc3h12a/Bmp4/Myocd/Mrpl44/Pus10/Prkra/Bcdin3d/Mecp2
GO:0030902	hindbrain development	20/1687	120/17970	0.00805287	Hspa5/Ctnnb1/Dab1/Gnpat/Pdss2/Hoxb3/Sptbn2/Uqcrq/Sec24b/Smad9/Herc1/Hnf1b/Faim2/Ophn1/Ttbk2/Foxc1/Egr2/Cntn1/Cep290/Mecp2
GO:0034655	nucleobase-containing compound catabolic process	39/1687	280/17970	0.00813747	Nudt1/Acot7/Zc3h12a/Entpd4/Dhx34/Skic3/Exosc4/Nudt7/Gtpbp1/Entpd4b/Itpa/Dcps/Zfp36l2/Pde8b/Isg20/Patl1/Nt5e/Exosc8/Upb1/Ythdf2/Entpd1/Tent5c/Ada/Hnrnpa0/Nbdy/Smpdl3a/Parn/Pnrc2/Prr5l/Zc3h14/Exog/Polr2d/Fen1/Dffb/Dcp2/Enpp5/Rnaseh2c/Trdmt1/Gm52783
GO:0044344	cellular response to fibroblast growth factor stimulus	14/1687	74/17970	0.0082816	Fgf1/Wnt5a/Ctnnb1/Fgf9/Spry2/Fgfr3/Nr4a1/Zfp36l2/Smoc2/Postn/Nptn/Dstyk/Star/Egr3
GO:0051193	regulation of cofactor metabolic process	6/1687	20/17970	0.00828796	Zfp13/Duoxa2/Noxa1/COX2/Clybl/Ptger4
GO:0072273	metanephric nephron morphogenesis	6/1687	20/17970	0.00828796	Ctnnb1/Bmp4/Wnt9b/Sox8/Lgr4/Grem1
GO:1903859	regulation of dendrite extension	6/1687	20/17970	0.00828796	Rims2/Prkn/Cpne9/Reg1/Slc23a2/Mecp2
GO:0072359	circulatory system development	95/1687	796/17970	0.00844375	Parva/Rnf213/Gaa/Fgf1/Wnt5a/Ifitm2/Tab1/Egr1/Kcnq1/Ctnnb1/Mmp2/Zc3h12a/Tbx2/Fgf9/Bmp4/Myocd/Fkbpl/Ccn1/Fdps/Adm/Dcn/Pik3cg/Nrarp/Ppp2ca/Smyd2/Luzp1/Lama1/Ltbp1/Casp8/Cth/Map3k7/Adgra2/Adgrg1/Nrp2/Spry2/Hoxb3/Ccdc134/Ep300/Hpgd/Chd7/Hspb6/Pitx2/Ddah1/Rin2/Cdkn1b/Plcd3/Nr4a1/Dhcr7/Col15a1/Pkp2/Smoc2/Ndufs6b/Ephb3/Popdc2/Sh3pxd2b/Galnt11/Sec24b/Il18/Stra6/Nus1/Epha2/Atp5b/Gm2788/Cdh13/Wdpcp/Dnaaf1/U…
GO:0030488	tRNA methylation	7/1687	26/17970	0.00844401	Lcmt2/Trmt12/Gm36279/Nsun4/Bcdin3d/Trmt6/Trdmt1
GO:0045746	negative regulation of Notch signaling pathway	7/1687	26/17970	0.00844401	Gdpd5/Nrarp/Bcl6/Rita1/Ythdf2/Rfng/Cbfa2t2
GO:0044270	cellular nitrogen compound catabolic process	43/1687	316/17970	0.00850399	Nudt1/Acot7/Zc3h12a/Entpd4/Kmo/Dhx34/Skic3/Exosc4/Nudt7/Gtpbp1/Entpd4b/Itpa/Dcps/Zfp36l2/Pde8b/Pdxp/Isg20/Hal/Patl1/Nt5e/Kynu/Exosc8/Upb1/Ythdf2/Entpd1/Tent5c/Ada/Hnrnpa0/Nbdy/Smpdl3a/Parn/Pnrc2/Prr5l/Zc3h14/Exog/Polr2d/Fen1/Dffb/Dcp2/Enpp5/Rnaseh2c/Trdmt1/Gm52783
GO:1901361	organic cyclic compound catabolic process	57/1687	442/17970	0.00855542	Ywhah/Nudt1/Prodh/Acot7/Zc3h12a/Entpd4/Kmo/Dhx34/Skic3/Exosc4/Gm46829/Nudt7/Gtpbp1/Entpd4b/Gm31349/Itpa/Dcps/Zfp36l2/Gm36787/Pde8b/Pdxp/Gm54336/Isg20/Hal/Patl1/Nt5e/Gm16702/Kynu/Gm36375/Gm41608/Exosc8/Upb1/Ythdf2/Entpd1/Tent5c/Ada/Gm36279/Hnrnpa0/Kyat3/Nbdy/Smpdl3a/Parn/Pnrc2/Gm42245/Prr5l/Zc3h14/Exog/Polr2d/Cyp46a1/Fen1/Dffb/Dcp2/Enpp5/Rnaseh2c/Trdmt1/Gm41450/Gm52783
GO:0070647	protein modification by small protein conjugation or removal	83/1687	683/17970	0.00855777	Rnf213/Fbxo31/Hspa5/Ctu1/Leo1/Egr1/Katna1/Rnf34/Ctnnb1/Ddx3x/Zc3h12a/Ubr3/Mkrn2/Ppia/Uba2/Cul4a/Josd1/Dda1/Usp1/Rnf4/Traf3/Dtl/Tulp4/Spry2/Caml/Usp15/Usp43/Trim72/Prkn/Anapc16/Prmt3/Peli1/Uspl1/Klhl7/Fbxo33/Per2/Eif3f/Uchl5/Dcaf6/Dtx4/Btbd1/Usp22/Pcnp/Arrdc4/Dtx3/Gm32340/Cul1/Wac/Shprh/Uchl1/Wfs1/Mylip/Usp30/Gm12444/Sh3rf2/Tnfaip3/Tnks/Marchf7/Klhl42/Cul7/Rnf146/Klhl8/Med18/Rnf135/Gm39210/Septin4…
GO:0007420	brain development	62/1687	488/17970	0.00865574	Gdpd5/Phf8/Hspa5/Snph/Wnt5a/Itga8/Ctnnb1/Dab1/Bmp4/Gnpat/Inhba/Pdss2/Arf4/Cenpf/Slc38a2/Dnajc30/Mast1/Tyro3/Adgrg1/Nes/Nrp2/Hoxb3/Ccdc134/Chd7/Jhy/Pitx2/Pcm1/Rab18/Npy/Sptbn2/Wnt9b/Meis3/Amigo1/Ephb3/Csnk2a1-ps3/Uqcrq/Aatk/Draxin/Uchl5/Sec24b/Smad9/Herc1/Gm32340/Hnf1b/Gas8/Faim2/Gnao1/Eif2b3/Ophn1/Ttbk2/Nnat/Adcy1/Septin4/Foxc1/Fbxo45/Egr2/Cntn1/Ppp1r9b/Dpysl2/Cep290/Mecp2/Star
GO:0072593	reactive oxygen species metabolic process	33/1687	229/17970	0.00866192	Smpd3/Duox2/Arg2/Zc3h12a/Cd177/Ccn1/Slc30a10/Zfp13/Arf4/Duoxa2/Noxo1/Map3k7/Slc5a3/Ddah1/Prkn/Noxa1/COX2/Nos1/Sh3pxd2b/Il18/Gls2/Tigar/Mapt/Nqo2/Zmiz1os1/Sesn2/Cat/Slc25a33/F2rl1/Ddah2/Ptger4/Sirpa/Nos3
GO:0045786	negative regulation of cell cycle	36/1687	255/17970	0.00870668	Ccnd1/Fbxo31/Nme6/Ctnnb1/Bmp4/Cul4a/Myocd/Mad1l1/Inhba/Birc5/Hexim2/Dtl/Hpgd/Zwint/Cdkn1b/Nr4a1/Wapl/Zfp36l2/Cdkn1c/Ticrr/Ercc6/Wac/Zfp655/Gm2788/Tnfaip3/Tnks/Spdl1/Map3k20/Gper1/Atm/Usp47/Foxc1/Xrcc3/2700099C18Rik/Ints7/Rbl2
GO:0007284	spermatogonial cell division	2/1687	2/17970	0.00880847	Ythdf2/Zfp449
GO:0010908	regulation of heparan sulfate proteoglycan biosynthetic process	2/1687	2/17970	0.00880847	Ctnnb1/Pxylp1
GO:0010909	positive regulation of heparan sulfate proteoglycan biosynthetic process	2/1687	2/17970	0.00880847	Ctnnb1/Pxylp1
GO:0021539	subthalamus development	2/1687	2/17970	0.00880847	Pitx2/Uqcrq
GO:0021577	hindbrain structural organization	2/1687	2/17970	0.00880847	Hspa5/Dab1
GO:0021589	cerebellum structural organization	2/1687	2/17970	0.00880847	Hspa5/Dab1
GO:0030263	apoptotic chromosome condensation	2/1687	2/17970	0.00880847	Gper1/Dffb
GO:0031930	mitochondria-nucleus signaling pathway	2/1687	2/17970	0.00880847	Chchd10/Slc25a33
GO:0032808	lacrimal gland development	2/1687	2/17970	0.00880847	Foxc1/Igsf3
GO:0034140	negative regulation of toll-like receptor 3 signaling pathway	2/1687	2/17970	0.00880847	Tnfaip3/F2rl1
GO:0036245	cellular response to menadione	2/1687	2/17970	0.00880847	Ndor1/Dcps
GO:0042986	positive regulation of amyloid precursor protein biosynthetic process	2/1687	2/17970	0.00880847	Abca2/Pawr
GO:0048752	semicircular canal morphogenesis	2/1687	2/17970	0.00880847	Chd7/Zeb1
GO:0060994	regulation of transcription from RNA polymerase II promoter involved in kidney development	2/1687	2/17970	0.00880847	Bmp4/Glis2
GO:0070781	response to biotin	2/1687	2/17970	0.00880847	Hlcs/Otc
GO:0071580	regulation of zinc ion transmembrane transport	2/1687	2/17970	0.00880847	Slc30a1/1700034H15Rik
GO:0071581	regulation of zinc ion transmembrane import	2/1687	2/17970	0.00880847	Slc30a1/1700034H15Rik
GO:0071582	negative regulation of zinc ion transport	2/1687	2/17970	0.00880847	Slc30a1/1700034H15Rik
GO:0071583	negative regulation of zinc ion transmembrane transport	2/1687	2/17970	0.00880847	Slc30a1/1700034H15Rik
GO:0071584	negative regulation of zinc ion transmembrane import	2/1687	2/17970	0.00880847	Slc30a1/1700034H15Rik
GO:0072038	mesenchymal stem cell maintenance involved in nephron morphogenesis	2/1687	2/17970	0.00880847	Wnt9b/Hnf1b
GO:0072181	mesonephric duct formation	2/1687	2/17970	0.00880847	Wnt9b/Hnf1b
GO:0097681	double-strand break repair via alternative nonhomologous end joining	2/1687	2/17970	0.00880847	Hmces/Polq
GO:0098923	retrograde trans-synaptic signaling by soluble gas	2/1687	2/17970	0.00880847	Gucy1a1/Nos1
GO:0098924	retrograde trans-synaptic signaling by nitric oxide	2/1687	2/17970	0.00880847	Gucy1a1/Nos1
GO:0099163	synaptic signaling by nitric oxide	2/1687	2/17970	0.00880847	Gucy1a1/Nos1
GO:0099543	trans-synaptic signaling by soluble gas	2/1687	2/17970	0.00880847	Gucy1a1/Nos1
GO:0099548	trans-synaptic signaling by nitric oxide	2/1687	2/17970	0.00880847	Gucy1a1/Nos1
GO:1901963	regulation of cell proliferation involved in outflow tract morphogenesis	2/1687	2/17970	0.00880847	Ctnnb1/Bmp4
GO:1902816	regulation of protein localization to microtubule	2/1687	2/17970	0.00880847	Ttbk2/Abhd17b
GO:1902817	negative regulation of protein localization to microtubule	2/1687	2/17970	0.00880847	Ttbk2/Abhd17b
GO:1903527	positive regulation of membrane tubulation	2/1687	2/17970	0.00880847	Atp10a/Sh3gl2
GO:1903852	positive regulation of cristae formation	2/1687	2/17970	0.00880847	Chchd10/Adck1
GO:1904048	regulation of spontaneous neurotransmitter secretion	2/1687	2/17970	0.00880847	Prkn/Ppp1r9a
GO:1904049	negative regulation of spontaneous neurotransmitter secretion	2/1687	2/17970	0.00880847	Prkn/Ppp1r9a
GO:1904098	regulation of protein O-linked glycosylation	2/1687	2/17970	0.00880847	Pomt2/Pomt1
GO:1904100	positive regulation of protein O-linked glycosylation	2/1687	2/17970	0.00880847	Pomt2/Pomt1
GO:1904154	positive regulation of retrograde protein transport, ER to cytosol	2/1687	2/17970	0.00880847	Edem1/Edem2
GO:1904672	regulation of somatic stem cell population maintenance	2/1687	2/17970	0.00880847	Hnf1b/Lbh
GO:1905150	regulation of voltage-gated sodium channel activity	2/1687	2/17970	0.00880847	Kcnq1/Gper1
GO:1905492	positive regulation of branching morphogenesis of a nerve	2/1687	2/17970	0.00880847	Map3k13/Mecp2
GO:2000182	regulation of progesterone biosynthetic process	2/1687	2/17970	0.00880847	Egr1/Dgkq
GO:2000721	positive regulation of transcription from RNA polymerase II promoter involved in smooth muscle cell differentiation	2/1687	2/17970	0.00880847	Itga8/Myocd
GO:2000724	positive regulation of cardiac vascular smooth muscle cell differentiation	2/1687	2/17970	0.00880847	Myocd/Gper1
GO:2000819	regulation of nucleotide-excision repair	2/1687	2/17970	0.00880847	Cul4a/Rad52
GO:0031175	neuron projection development	80/1687	656/17970	0.00893109	Ywhah/Gdpd5/Fbxo31/Hspa5/Wnt5a/Katna1/Ctnnb1/Dab1/Lrp4/Mmp2/Cyfip1/Aurka/Dynlt1c/Rims2/Bmp4/Tbc1d24/Lamb2/Adm/Arf4/Raph1/Lama1/Ror2/Nrp2/Ep300/Bloc1s6/Prkn/Npy/Sema6c/Ppp1r9a/Prmt3/Sema4f/Pcp4/Sipa1l1/Amigo1/Cpne9/Ephb3/Fstl4/Spast/Aatk/Draxin/Tmem106b/Sec24b/Ercc6/Herc1/Map3k13/Mapt/Mylip/Reg1/Epha2/Gnao1/Gm46764/Postn/Lgr4/Pak6/Wdr36/Ophn1/Ss18l1/Cul7/Nptn/Slc23a2/Adam10/Adnp/Rapgef4/Adcy1/Srci…
GO:0048667	cell morphogenesis involved in neuron differentiation	47/1687	353/17970	0.00913127	Ywhah/Fbxo31/Wnt5a/Dab1/Lrp4/Cyfip1/Lamb2/Raph1/Lama1/Nrp2/Ep300/Sema6c/Ppp1r9a/Prmt3/Sema4f/Sipa1l1/Amigo1/Ephb3/Fstl4/Ift56/Spast/Aatk/Draxin/Tmem106b/Sec24b/Map3k13/Mapt/Epha2/Gm46764/Wdpcp/Lgr4/Wdr36/Ophn1/Ss18l1/Cul7/Nptn/Adam10/Adnp/Adcy1/Srcin1/Fbxo45/Slitrk4/Egr2/Abitram/Dpysl2/Megf8/Zfyve27
GO:0006913	nucleocytoplasmic transport	31/1687	213/17970	0.00932338	Frat1/Zc3h12a/Wipf1/Nxf1/Pom121/Fgf9/Bmp4/Riok2/Rangrf/Ppp2ca/Bmal1/Ep300/Ipo4/Nup160/Rab18/Thoc2l/Rita1/Gm32340/Mavs/Styx/Ctdspl2/Tmco6/Adam10/Kpna4/Chtop/Gper1/Egr2/Sarnp/Polr2d/Ltv1/Thoc2
GO:0051169	nuclear transport	31/1687	213/17970	0.00932338	Frat1/Zc3h12a/Wipf1/Nxf1/Pom121/Fgf9/Bmp4/Riok2/Rangrf/Ppp2ca/Bmal1/Ep300/Ipo4/Nup160/Rab18/Thoc2l/Rita1/Gm32340/Mavs/Styx/Ctdspl2/Tmco6/Adam10/Kpna4/Chtop/Gper1/Egr2/Sarnp/Polr2d/Ltv1/Thoc2
GO:0009141	nucleoside triphosphate metabolic process	17/1687	98/17970	0.00940204	Uck2/Nme6/Entpd4/Dnajc30/Gtpbp1/Entpd4b/Prkn/Itpa/COX2/Gm6581/Atp5d/Nme7/Ldhd/Atp5b/Entpd1/Ada/Smpdl3a
GO:0051588	regulation of neurotransmitter transport	18/1687	106/17970	0.00955971	Rims2/Kmo/Maob/Slc30a1/Prkn/Ppp1r9a/Syp/Nos1/Per2/1700034H15Rik/Rab5a/Rhot1/Gper1/Ptger4/Adcy1/Kcnc3/Sv2a/Unc13b
GO:0097190	apoptotic signaling pathway	50/1687	381/17970	0.00960109	Mtch2/Pdx1/Rnf34/Ctnnb1/Ddx3x/Dnajc10/Ppia/Wwox/Ppm1f/Bmp4/Inhba/Zfp13/Chchd10/Pdia3/Casp8/Cth/Map3k7/Pawr/Vnn1/Ep300/Fgfr3/Prkn/Melk/Meis3/Ell3/Ercc6/Bnip3l-ps/Il18/Sgk3/Eya2/Mapt/Wfs1/Epha2/Faim2/Cd27/Rhot1/Tnfaip3/Gm20604/Marchf7/Casp8ap2/Dapl1/Tnfrsf10b/Clca3a1/Gper1/Septin4/Usp47/Sort1/Atad5/Tgfbr1/Dnaja1
GO:1901698	response to nitrogen compound	93/1687	781/17970	0.00964199	Slc2a4/Smpd3/Hspa5/Edem1/Pdx1/Egr1/Kcnq1/Ctnnb1/Pomt2/Mmp2/Cyfip1/Dnajc10/Sesn3/Tac1/Slc30a10/Adm/Pik3cg/Ppp2ca/Mgst1/Ifit1bl2/Rnf4/Uqcrc1/Dgkq/Slc26a6/P2rx6/Reg3a/Cdkn1b/Trim72/Nr4a1/Prkn/Slc27a1/Fads1/Meak7/Klf11/Zbed3/Peli1/Gnb5/Nos1/Amigo1/Pdxp/Gip/Cpt1a/Pla2g5/Il18/Ddx11/Erlin1/Gm46878/Slc26a3/Wfs1/Ly6g2/Mylip/Reg1/Gnao1/Cdh13/Mavs/Tnfaip3/Eif2b3/Sesn2/Aqp8/Ubqln2/Slc25a33/Ada/Gpd1/Nucb2/Ser…
GO:0060324	face development	8/1687	33/17970	0.00975189	Wnt5a/Mmp2/Crispld2/Hoxb3/Ep300/Chd7/Plekha1/Stra6
GO:0090183	regulation of kidney development	8/1687	33/17970	0.00975189	Egr1/Ctnnb1/Bmp4/Wnt9b/Sox8/Hnf1b/Lgr4/Grem1
GO:0002098	tRNA wobble uridine modification	5/1687	15/17970	0.00975803	Ctu1/Mto1/Kti12/Trmt9b/Elp1
GO:0009134	nucleoside diphosphate catabolic process	5/1687	15/17970	0.00975803	Entpd4/Entpd4b/Nt5e/Entpd1/Gm52783
GO:0034331	cell junction maintenance	5/1687	15/17970	0.00975803	Cldn3/Cd177/Pkp2/Prtn3/F2rl1
GO:0045198	establishment of epithelial cell apical/basal polarity	5/1687	15/17970	0.00975803	Wnt5a/Sh3bp1/Lama1/Tcf15/Ophn1
GO:0072087	renal vesicle development	5/1687	15/17970	0.00975803	Ctnnb1/Bmp4/Wnt9b/Sox8/Grem1
GO:1902473	regulation of protein localization to synapse	5/1687	15/17970	0.00975803	Mapt/Nptn/Adam10/Rapgef4/Abhd17b
GO:1903798	regulation of production of miRNAs involved in gene silencing by miRNA	5/1687	15/17970	0.00975803	Zc3h12a/Bmp4/Myocd/Bcdin3d/Mecp2
GO:1904861	excitatory synapse assembly	5/1687	15/17970	0.00975803	Sipa1l1/Lrfn4/Vstm5/Lrrc4b/Nptn
GO:0043279	response to alkaloid	15/1687	83/17970	0.00981297	Hspa5/Pdx1/Tac1/Uqcrc1/Nos1/Cpt1a/Gnao1/Ada/Bche/Abcg2/Dnmt3b/Ppp1r9b/Tmed10-ps/Mecp2/Star
GO:0062197	cellular response to chemical stress	33/1687	231/17970	0.00982548	Smpd3/Ctnnb1/Ddx3x/Mmp2/Zc3h12a/Ppia/Bmp4/Mgst1/Bmal1/Pawr/Vnn1/Gsr/Plekha1/Prkn/Melk/Meak7/Adprs/Mapt/Tnfaip3/Brf2/Sesn2/Slc12a6/Rnf146/Rad52/Ncoa7/Sirpa/Prr5l/Lrrc8d/Oser1/Dnmt3b/Ankzf1/Dnaja1/Nos3
GO:0016241	regulation of macroautophagy	13/1687	68/17970	0.00982893	Poldip2/Sesn3/Dcn/Map3k7/Prkn/Irgm2/Bnip3l-ps/Tigar/Wac/Usp30/Sesn2/Ubqln2/Fyco1
GO:1901879	regulation of protein depolymerization	13/1687	68/17970	0.00982893	Tmod3/Sh3bp1/Eps8/Mid1/Nes/Sptbn2/Pdxp/Spast/Capza2/Ttbk2/F2rl1/Plekhh2/Avil
GO:0007417	central nervous system development	80/1687	659/17970	0.00995556	Gdpd5/Phf8/Hspa5/Snph/Pdx1/Wnt5a/Marcks/Cldn3/Itga8/Ctnnb1/Dab1/Nkx6-2/Bmp4/Lamb2/Gnpat/Inhba/Pdss2/Arf4/Cenpf/Slc38a2/Dnajc30/Ror2/Mast1/Adgra2/Tyro3/Adgrg1/Nes/Nrp2/Hoxb3/Ccdc134/Chd7/Jhy/Pitx2/Pcm1/Rab18/Npy/Sptbn2/Wnt9b/Meis3/Amigo1/Ephb3/Csnk2a1-ps3/Uqcrq/Aldh5a1/Aatk/Draxin/Uchl5/Sec24b/Smad9/Vstm5/Herc1/Sox8/Gm32340/Hnf1b/Gas8/Hdac11/Faim2/Gnao1/Eif2b3/Tmem98/Ophn1/Ttbk2/Nnat/Glis2/Atp6ap2…
GO:0051983	regulation of chromosome segregation	16/1687	91/17970	0.0101594	Ctnnb1/Mad1l1/Riok2/Birc5/Zwint/Wapl/Gm33950/Csnk2a1-ps3/Smc6/Ddx11/Gm46764/Tnks/Spdl1/Xrcc3/2700099C18Rik/Sgo2a
GO:0006020	inositol metabolic process	4/1687	10/17970	0.0102305	Impa1/Ppip5k1/Slc5a3/Mecp2
GO:0006152	purine nucleoside catabolic process	4/1687	10/17970	0.0102305	Nudt1/Entpd4/Entpd4b/Ada
GO:0006825	copper ion transport	4/1687	10/17970	0.0102305	Heph/Slc31a2/Atp7b/Mmgt2
GO:0010566	regulation of ketone biosynthetic process	4/1687	10/17970	0.0102305	Egr1/Dkk3/Dgkq/H6pd
GO:0032211	negative regulation of telomere maintenance via telomerase	4/1687	10/17970	0.0102305	Ctc1/Terf1/Dcp2/Pif1
GO:0051152	positive regulation of smooth muscle cell differentiation	4/1687	10/17970	0.0102305	Tmsb4x/Myocd/Cth/Gper1
GO:0051481	negative regulation of cytosolic calcium ion concentration	4/1687	10/17970	0.0102305	Smpd3/Kcnk3/Hrc/Nos1
GO:0071609	chemokine (C-C motif) ligand 5 production	4/1687	10/17970	0.0102305	Arg2/Mavs/Mcoln2/Sirpa
GO:0071649	regulation of chemokine (C-C motif) ligand 5 production	4/1687	10/17970	0.0102305	Arg2/Mavs/Mcoln2/Sirpa
GO:0090281	negative regulation of calcium ion import	4/1687	10/17970	0.0102305	Pawr/Hrc/Slc30a1/1700034H15Rik
GO:1901881	positive regulation of protein depolymerization	4/1687	10/17970	0.0102305	Nes/Pdxp/Spast/F2rl1
GO:1902746	regulation of lens fiber cell differentiation	4/1687	10/17970	0.0102305	Spry2/Cdkn1b/Cdkn1c/Spred1
GO:1904889	regulation of excitatory synapse assembly	4/1687	10/17970	0.0102305	Sipa1l1/Lrfn4/Vstm5/Lrrc4b
GO:0048589	developmental growth	61/1687	483/17970	0.0103365	Smpd3/Wnt5a/Ctc1/Ctnnb1/Lrp4/Cyfip1/Eppk1/Aurka/Rims2/Tbx2/Fgf9/Bmp4/Myocd/Lamb2/Fdps/Adm/Raph1/Nrp2/Spry2/Ep300/Chd7/Plekha1/Cdkn1b/Prkn/Adrb3/Dhcr7/Sema6c/Cdkn1c/Prlr/Sptbn2/Ndufs6b/Cpne9/Fstl4/Sh3pxd2b/Aatk/Draxin/Ercc6/Map3k13/Stra6/Hnf1b/Mapt/Sgip1/Reg1/Sp2/Gm46764/Postn/Pak6/Wdr36/Slc23a2/Adnp/Ptger4/Foxc1/Sh3gl2/Dpysl2/Megf8/Dusp6/Tgfbr1/Cpq/Sash3/Zfyve27/Mecp2
GO:0030834	regulation of actin filament depolymerization	9/1687	40/17970	0.0104205	Tmod3/Sh3bp1/Eps8/Sptbn2/Pdxp/Capza2/F2rl1/Plekhh2/Avil
GO:0046839	phospholipid dephosphorylation	9/1687	40/17970	0.0104205	Inpp5j/Plpp5/Plppr1/Mtmr7/Mtmr2/Spata6l/Pip4p2/Sacm1l/Fig4
GO:0009062	fatty acid catabolic process	14/1687	76/17970	0.0104713	Cpt2/Cyp4f40/Tysnd1/Echdc1/Lonp2/Nudt7/Hpgd/Hadhb/Cpt1a/Ehhadh/Sesn2/Cyp4f18/Lpin1/Acot2
GO:0006006	glucose metabolic process	25/1687	164/17970	0.0104934	Pdx1/Kcnq1/Gm29667/Eno1b/Gm46840/Dgkq/Ep300/Prkn/H6pd/Ppp1cb/Cpt1a/Fam3a/G6pc3/Per2/Ppp1r3d/Tigar/Adpgk/Sesn2/Gpd1/Gapdh/Gdpgp1/Pask/Gm12070/Epm2aip1/Supt20
GO:0032210	regulation of telomere maintenance via telomerase	7/1687	27/17970	0.0104945	Ctc1/Ctnnb1/Terf1/Cct4/Tnks/Dcp2/Pif1
GO:0050728	negative regulation of inflammatory response	18/1687	107/17970	0.0105136	Zc3h12a/Lpcat3/Gpx2/Tyro3/Pglyrp1/Il22ra2/Wfdc1/Nt5e/Il20rb/Tnfaip3/Ada/Calcrl/Gper1/Gpx2-ps1/Ptger4/Sirpa/Proc/Macir
GO:0051336	regulation of hydrolase activity	81/1687	670/17970	0.0105333	Mtch2/Lamtor5/Wnt5a/Gchfr/Cldn3/Rnf34/Ddx3x/Mgat5/Dnajc10/Ppm1f/Ltf/Gpihbp1/Snx18/Ccn1/Arf4/Naip1/Ppp2ca/Sh3bp1/Birc5/Gpr55/Casp8/Ccl8/Pawr/Dennd1b/Spry2/Ep300/Gmip/Fgfr3/Nr4a1/Ccl20/Ccl9/Myl4/Arhgap15/Gnb5/Sipa1l1/Arhgap42/Nos1/Ephb3/Arhgap29/Csnk2a1-ps3/Arhgap6/Bcl6/Tmem106b/Serpinb1a/Ndel1/Ddx11/Terf1/Ppp1r2/Mmut/Epha2/Gnao1/Arhgap11a/Ccl22/Sh3rf2/Prtn3/Ppp1r2-ps2/Tbc1d30/Casp8ap2/F2rl1/Serpin…
GO:0050805	negative regulation of synaptic transmission	10/1687	47/17970	0.0106379	Kcnb1/Slc30a1/Prkn/Ppp1r9a/1700034H15Rik/Mtmr2/Mapt/Adnp/Bche/Rapgef4
GO:0030808	regulation of nucleotide biosynthetic process	6/1687	21/17970	0.0106981	Dnajc30/Prkn/COX2/Nos1/Entpd1/Nos3
GO:0032205	negative regulation of telomere maintenance	6/1687	21/17970	0.0106981	Ctc1/Terf1/Tnks/Dcp2/Pif1/Terf2ip
GO:0051589	negative regulation of neurotransmitter transport	6/1687	21/17970	0.0106981	Maob/Slc30a1/Prkn/Ppp1r9a/Nos1/1700034H15Rik
GO:1900371	regulation of purine nucleotide biosynthetic process	6/1687	21/17970	0.0106981	Dnajc30/Prkn/COX2/Nos1/Entpd1/Nos3
GO:0009199	ribonucleoside triphosphate metabolic process	15/1687	84/17970	0.0109385	Uck2/Nme6/Entpd4/Dnajc30/Gtpbp1/Entpd4b/Prkn/Itpa/COX2/Gm6581/Atp5d/Nme7/Ldhd/Atp5b/Entpd1
GO:0010810	regulation of cell-substrate adhesion	22/1687	140/17970	0.0111904	Poldip2/Ppm1f/Ccn1/Rin2/Ecm2/Spock2/Smoc2/Arhgap6/Bcl6/Limch1/Cdh13/Ccdc80/Dock1/Wdpcp/Postn/Col8a1/Grem1/Col16a1/Rell2/Alox15/Ccl28/Olfm4
GO:2001234	negative regulation of apoptotic signaling pathway	22/1687	140/17970	0.0111904	Pdx1/Rnf34/Ctnnb1/Ddx3x/Ppia/Bmp4/Cth/Map3k7/Vnn1/Prkn/Meis3/Ell3/Sgk3/Eya2/Wfs1/Faim2/Tnfaip3/Marchf7/Usp47/Atad5/Tgfbr1/Dnaja1
GO:0090316	positive regulation of intracellular protein transport	16/1687	92/17970	0.0112572	Edem1/Zc3h12a/Wipf1/Kcnb1/Riok2/Ep300/Pcm1/Tmem30b/Mief1/Mavs/Ctdspl2/Edem2/Gper1/Prr5l/Hspa1l/Cep290
GO:0007416	synapse assembly	19/1687	116/17970	0.0115465	Wnt5a/Lrp4/Gnpat/Ppp1r9a/Sptbn2/Sipa1l1/Amigo1/Ephb3/Lrfn4/Vstm5/Lrrc4b/Setd5/Mapt/Nptn/Adnp/Fbxo45/Slitrk4/Gphn/Mecp2
GO:0051270	regulation of cellular component movement	84/1687	701/17970	0.0115502	Tmsb4x/Fbxo31/Smpd3/Hspa5/Wdr44/Wnt5a/Egr1/Cldn3/Mmp2/Zc3h12a/Eppk1/Mgat5/Gm12854/Ppm1f/Fgf9/Bmp4/Myocd/Ccn1/Tac1/Rangrf/Dcn/Pik3cg/Duoxa2/Sh3bp1/Mtus1/Lama1/Ror2/Atoh8/Patz1/Adgra2/Pawr/Adgrg1/Spry2/Pitx2/Rin2/Cdkn1b/Sema6c/Ccl20/Pkp2/Meak7/Smoc2/Nos1/Bcl6/Il18/Limch1/Mapt/Edn2/Nus1/Rab5a/Epha2/Atp5b/Cdh13/Sh3rf2/Rhot1/Dock1/Wdpcp/Postn/Dnaaf1/Grem1/Ttbk2/Kcne3/Ada/Adam10/F2rl1/Pgf/Gper1/Ptger4/…
GO:0042472	inner ear morphogenesis	12/1687	62/17970	0.0116575	Wnt5a/Kcnq1/Itga8/Fgf9/Ror2/Sobp/Spry2/Chd7/Sec24b/Wdpcp/Cep290/Zeb1
GO:0048285	organelle fission	47/1687	358/17970	0.0116769	Mtch2/Smpd3/Mtfp1/Nme6/Wnt5a/Poldip2/Aurka/Bmp4/Mad1l1/Riok2/Dcn/Birc5/Prc1/Rec8/Zwint/Cdkn1b/Prkn/Cdkn1c/Zscan21/Gm33950/Pdxp/Myo19/Spast/Togaram1/Pex11b/Ndel1/Terf1/Mapt/Mzt1/Mief1/Tnks/Spdl1/Ccne2/Nsl1/Syce3/Cul7/Dnm1l/Psmc3ip/Rad54b/Xrcc3/2700099C18Rik/Pde3a/Togaram2/Syce2/Tgfa/Spice1/Sgo2a
GO:0031076	embryonic camera-type eye development	8/1687	34/17970	0.0117275	Tbx2/Aldh1a1/Nes/Pitx2/Stra6/Snora73b/Cdk20/Zeb1
GO:0061005	cell differentiation involved in kidney development	8/1687	34/17970	0.0117275	Ctnnb1/Bmp4/Lamb2/Wnt9b/Lgr4/Grem1/Glis2/Gpr4
GO:0048598	embryonic morphogenesis	55/1687	431/17970	0.0118079	Pdx1/Leo1/Wnt5a/Kcnq1/Itga8/Ctnnb1/Lrp4/Mmp2/Tbx2/Fgf9/Bmp4/Ccn1/Inhba/Adm/Aldh1a1/Luzp1/Ror2/Atoh8/Sobp/Casp8/Map3k7/Spry2/Hoxb3/Chd7/Pitx2/Nat8/Slc39a3/Cdkn1c/Wnt9b/Itgb4/Lamb3/Sec24b/Stra6/Sox8/Hnf1b/Snora73b/Lmbrd1/Epha2/Ythdf2/Tnfaip3/Wdpcp/Dnaaf1/Col8a1/Msx3/Grem1/Ttbk2/Map3k20/Foxc1/Grem2/Megf8/Tgfbr1/Cep290/Cdk20/Zeb1/Supt20
GO:0034599	cellular response to oxidative stress	28/1687	191/17970	0.0118376	Smpd3/Ctnnb1/Mmp2/Zc3h12a/Ppia/Bmp4/Mgst1/Bmal1/Pawr/Vnn1/Gsr/Plekha1/Prkn/Melk/Meak7/Adprs/Mapt/Tnfaip3/Brf2/Sesn2/Rnf146/Rad52/Ncoa7/Sirpa/Prr5l/Oser1/Ankzf1/Nos3
GO:0048646	anatomical structure formation involved in morphogenesis	94/1687	797/17970	0.0118951	Parva/Rnf213/Krt19/Smpd3/Fgf1/Leo1/Wnt5a/Ctnnb1/Mmp2/Zc3h12a/Tbx2/Fgf9/Bmp4/Fkbpl/Ccn1/Gnpat/Inhba/Adm/Aldh1a1/Dcn/Pik3cg/Nrarp/Luzp1/Ror2/Atoh8/Casp8/Map3k7/Ccl8/Adgra2/Adgrg1/Nrp2/Spry2/Hoxb3/Ccdc134/Ep300/Hspb6/Pitx2/Ddah1/Tcf15/Plcd3/Nr4a1/Lman2l/Col15a1/Smoc2/Wnt9b/Uspl1/Itgb4/Ephb3/Bcl6/Lamb3/Megf11/Sec24b/Il18/Herc1/Stra6/Sox8/Cd53/Hnf1b/Mtmr2/Snora73b/Nus1/Epha2/Faim2/Atp5b/Gm2788/Cdh13/T…
GO:0010976	positive regulation of neuron projection development	29/1687	200/17970	0.0122027	Fbxo31/Hspa5/Wnt5a/Cyfip1/Dynlt1c/Rims2/Bmp4/Ror2/Ep300/Prkn/Ppp1r9a/Pcp4/Amigo1/Cpne9/Tmem106b/Map3k13/Mapt/Reg1/Ss18l1/Cul7/Nptn/Slc23a2/Adnp/Avil/Cntn1/Megf8/Zfyve27/Cbfa2t2/Mecp2
GO:0006730	one-carbon metabolic process	9/1687	41/17970	0.012267	Car4/Fpgs/Ahcyl1/Particl/Car13/Car5b/Car11/Shmt1/Sfxn3
GO:0003013	circulatory system process	46/1687	350/17970	0.0122673	Gaa/Smpd3/Kcnq1/Mmp2/Zc3h12a/Tbx2/Tac1/Rangrf/Adm/Qrfp/Gucy1a1/Hrc/Klk1/Chd7/Ddah1/Npy/Adrb3/Myl4/Pkp2/Ptger2/Arhgap42/Nos1/Popdc2/Per2/Il18/Slc4a3/Edn2/Gnao1/Postn/Cyp4f18/Kcne3/Ada/Erap1/F2rl1/Atp6ap2/Gper1/Foxc1/Pde3a/Tnni2/Bves/Dsp/Tbxa2r/Nos3/Gpr4/Tnni1/Mecp2
GO:0030042	actin filament depolymerization	10/1687	48/17970	0.0123363	Tmod3/Sh3bp1/Eps8/Sptbn2/Pdxp/Capza2/F2rl1/Plekhh2/Avil/Ppp1r9b
GO:1901983	regulation of protein acetylation	10/1687	48/17970	0.0123363	Ddx3x/Myocd/Bmal1/Ep300/Cep295/Nos1/Setd5/Fam161a/Msx3/Terf2ip
GO:0033045	regulation of sister chromatid segregation	13/1687	70/17970	0.0124911	Ctnnb1/Mad1l1/Riok2/Birc5/Zwint/Wapl/Gm33950/Ddx11/Tnks/Spdl1/Xrcc3/2700099C18Rik/Sgo2a
GO:0043087	regulation of GTPase activity	33/1687	235/17970	0.0125388	Wnt5a/Snx18/Sh3bp1/Ccl8/Dennd1b/Spry2/Gmip/Ccl20/Ccl9/Arhgap15/Gnb5/Sipa1l1/Arhgap42/Ephb3/Arhgap29/Arhgap6/Bcl6/Mmut/Epha2/Gnao1/Arhgap11a/Ccl22/Prtn3/Tbc1d30/F2rl1/Rasgrp3/Dock11/Evi5l/Bves/Gm40855/Tbc1d2/Cblb/Rgl3
GO:0003231	cardiac ventricle development	17/1687	101/17970	0.0126002	Wnt5a/Fgf9/Bmp4/Myocd/Ccn1/Ppp2ca/Luzp1/Ltbp1/Chd7/Pitx2/Pkp2/Stra6/Foxc1/Tgfbr1/Dsp/Nos3/Tnni1
GO:0010594	regulation of endothelial cell migration	18/1687	109/17970	0.0126478	Wnt5a/Zc3h12a/Bmp4/Dcn/Pik3cg/Sh3bp1/Atoh8/Patz1/Adgra2/Rin2/Smoc2/Nus1/Epha2/Atp5b/Spred1/Tbxa2r/Nos3/Mecp2
GO:0120031	plasma membrane bounded cell projection assembly	50/1687	387/17970	0.0127121	Parva/Kcnq1/Cyfip1/Sh3bp1/Cep135/Jhy/Cep162/Pcm1/Txndc15/Ppp1r9a/Iqcb1/Itgb4/Emp1/Gorab/Ift56/Togaram1/Galnt11/Gm47324/Vstm5/Pld1/Dnaaf2/Gas8/Ptpdc1/Rab5a/Epha2/Fam161a/Cdh13/Wdpcp/Dnaaf1/Cfap157/Vdac3/Odf2l/Ttbk2/Tbc1d30/Cep19/Bbof1/F2rl1/Armc2/Zmynd10/Mapre1/2700049A03Rik/Avil/Abitram/Dock11/Ppp1r9b/Dpysl2/Tgfbr1/Mns1/Macir/Cep290
GO:0007020	microtubule nucleation	7/1687	28/17970	0.0128841	Slain2/Tubgcp4/Rangrf/Tubgcp2/Pde4dip/Mzt1/Mecp2
GO:0032350	regulation of hormone metabolic process	7/1687	28/17970	0.0128841	Egr1/Dkk3/Duoxa2/Dgkq/Prmt3/H6pd/Pde8b
GO:0010632	regulation of epithelial cell migration	22/1687	142/17970	0.0131086	Wnt5a/Zc3h12a/Eppk1/Ppm1f/Bmp4/Tac1/Dcn/Pik3cg/Sh3bp1/Atoh8/Patz1/Adgra2/Rin2/Smoc2/Nus1/Epha2/Atp5b/Dock1/Spred1/Tbxa2r/Nos3/Mecp2
GO:0042795	snRNA transcription by RNA polymerase II	5/1687	16/17970	0.0131144	Ell2/Ell3/Snapc4/Cc2d1a/Zfp143
GO:0051156	glucose 6-phosphate metabolic process	5/1687	16/17970	0.0131144	Pgam1/H6pd/G6pc3/Tigar/Hkdc1
GO:0055069	zinc ion homeostasis	5/1687	16/17970	0.0131144	Slc30a10/Slc30a1/Prkn/1700034H15Rik/Atp7b
GO:0060065	uterus development	5/1687	16/17970	0.0131144	Wnt5a/Myocd/Cdkn1c/Wnt9b/Stra6
GO:0070920	regulation of production of small RNA involved in gene silencing by RNA	5/1687	16/17970	0.0131144	Zc3h12a/Bmp4/Myocd/Bcdin3d/Mecp2
GO:0033273	response to vitamin	12/1687	63/17970	0.0132048	Pdx1/Pdia3/Mn1/Pitx2/Fads1/Postn/Ada/Bche/Abcg2/Hlcs/Dnmt3b/Otc
GO:1901292	nucleoside phosphate catabolic process	12/1687	63/17970	0.0132048	Acot7/Entpd4/Nudt7/Entpd4b/Itpa/Pde8b/Nt5e/Entpd1/Ada/Smpdl3a/Enpp5/Gm52783
GO:0003223	ventricular compact myocardium morphogenesis	3/1687	6/17970	0.0132911	Chd7/Tgfbr1/Dsp
GO:0031946	regulation of glucocorticoid biosynthetic process	3/1687	6/17970	0.0132911	Dkk3/Dgkq/H6pd
GO:0034139	regulation of toll-like receptor 3 signaling pathway	3/1687	6/17970	0.0132911	Peli1/Tnfaip3/F2rl1
GO:0036152	phosphatidylethanolamine acyl-chain remodeling	3/1687	6/17970	0.0132911	Lpcat3/Mboat2/Pla2g4c
GO:0061156	pulmonary artery morphogenesis	3/1687	6/17970	0.0132911	Bmp4/Sec24b/Stra6
GO:0072172	mesonephric tubule formation	3/1687	6/17970	0.0132911	Wnt9b/Hnf1b/Grem1
GO:0072178	nephric duct morphogenesis	3/1687	6/17970	0.0132911	Bmp4/Wnt9b/Hnf1b
GO:1900454	positive regulation of long-term synaptic depression	3/1687	6/17970	0.0132911	Kcnb1/Ppp1r9a/Mapt
GO:2000064	regulation of cortisol biosynthetic process	3/1687	6/17970	0.0132911	Dkk3/Dgkq/H6pd
GO:0016311	dephosphorylation	33/1687	236/17970	0.0133046	Inpp5j/Acp6/Tab1/Impa1/Mgat5/Ppia/Ppm1f/Camta1/Cdca2/Ppp2ca/Ywhab/Dusp28/Pawr/Plpp5/Plppr1/Mtmr7/Cttnbp2nl/Pdxp/Ppp1cb/Pxylp1/Eya2/Mtmr2/Ppp1r2/Sh3rf2/Spata6l/Ppp1r2-ps2/Ctdspl2/Pip4p2/Sacm1l/Fig4/Ppp1r9b/Cnep1r1/Dusp6
GO:0000226	microtubule cytoskeleton organization	60/1687	480/17970	0.0133649	Gas2l3/Poldip2/Katna1/Ctnnb1/Aurka/Dynlt1c/Slain2/Cenpa/Tubgcp4/Bnip2/Rangrf/Birc5/Rnf4/Haus2/Cep135/Mid1/Prc1/Spry2/Jhy/Pcm1/Cdkn1b/Cep295/Tubgcp2/Zbed3/Sapcd2/Ift56/Spast/Togaram1/Gm47324/Ndel1/Dnaaf2/Pde4dip/Gas8/Mapt/Mzt1/Gm46764/Dnaaf1/Tnks/Spdl1/Cfap157/Cul7/Cdc42bpa/Ninl/Ttbk2/Cep19/Armc2/Zmynd10/Mapre1/Hook1/Stmn2/Xrcc3/2700099C18Rik/Togaram2/Gm5808/Cep152/Mns1/Spice1/Cep290/Mecp2/Kif20a
GO:2000377	regulation of reactive oxygen species metabolic process	24/1687	159/17970	0.0134438	Smpd3/Arg2/Zc3h12a/Cd177/Slc30a10/Zfp13/Arf4/Duoxa2/Map3k7/Slc5a3/Ddah1/Prkn/Noxa1/COX2/Il18/Tigar/Mapt/Nqo2/Zmiz1os1/Slc25a33/F2rl1/Ddah2/Ptger4/Sirpa
GO:0071407	cellular response to organic cyclic compound	46/1687	352/17970	0.0135028	Ywhah/Hspa5/Egr1/Kcnq1/Ctnnb1/Mmp2/Zc3h12a/Bmp4/Inhba/Pik3cg/Ppp2ca/Ifit1bl2/Pdia3/Rnf4/Bmal1/Sp5/Slc26a6/Mn1/Ep300/Cdkn1b/Elk1/Zfp36l2/Gnb5/Nos1/Pdxp/Scnn1a/Il18/Smad9/Gm32340/Slc26a3/Gnao1/Mavs/Aqp8/Gpd1/Gper1/Lbh/Adcy1/Abcg2/Ifit1bl1/Pde3a/Dnmt3b/Ppp1r9b/Dnaja1/Mecp2/Star/Trerf1
GO:0019439	aromatic compound catabolic process	44/1687	334/17970	0.0135384	Nudt1/Acot7/Zc3h12a/Entpd4/Kmo/Dhx34/Skic3/Exosc4/Nudt7/Gtpbp1/Entpd4b/Itpa/Dcps/Zfp36l2/Pde8b/Pdxp/Isg20/Hal/Patl1/Nt5e/Kynu/Exosc8/Upb1/Ythdf2/Entpd1/Tent5c/Ada/Hnrnpa0/Kyat3/Nbdy/Smpdl3a/Parn/Pnrc2/Prr5l/Zc3h14/Exog/Polr2d/Fen1/Dffb/Dcp2/Enpp5/Rnaseh2c/Trdmt1/Gm52783
GO:0014072	response to isoquinoline alkaloid	6/1687	22/17970	0.0135653	Tac1/Gnao1/Ada/Abcg2/Ppp1r9b/Mecp2
GO:0032885	regulation of polysaccharide biosynthetic process	6/1687	22/17970	0.0135653	Smpd3/Ppp1cb/Ppp1r3d/Ptger4/Pask/Epm2aip1
GO:0040036	regulation of fibroblast growth factor receptor signaling pathway	6/1687	22/17970	0.0135653	Wnt5a/Ctnnb1/Spry2/Smoc2/Nptn/Dstyk
GO:0051017	actin filament bundle assembly	19/1687	118/17970	0.0137461	Marcks/Ppm1f/Tac1/Eps8/Shroom1/Pawr/Prkn/Ppp1r9a/Gm52861/Pdxp/Sh3pxd2b/Arhgap6/Limch1/Ptger4/Dpysl2/Gm40363/Gm53330/Tgfbr1/Synpo2
GO:0009166	nucleotide catabolic process	11/1687	56/17970	0.0138113	Acot7/Entpd4/Nudt7/Entpd4b/Itpa/Pde8b/Nt5e/Entpd1/Ada/Enpp5/Gm52783
GO:0035194	posttranscriptional gene silencing by RNA	11/1687	56/17970	0.0138113	Zc3h12a/Wtip/Bmp4/Myocd/Mrpl44/Pus10/Ago4/Prkra/Bcdin3d/Ago1/Mecp2
GO:0001658	branching involved in ureteric bud morphogenesis	8/1687	35/17970	0.0139823	Ctnnb1/Bmp4/Wnt9b/Sox8/Hnf1b/Lgr4/Grem1/Pgf
GO:0015850	organic hydroxy compound transport	25/1687	168/17970	0.014013	Smpd3/Kcnq1/Lpcat3/Kcnb1/Abca2/Tac1/Maob/Slc26a6/Slc5a3/Prkn/Slc10a3/Pcp4/Nos1/Slc10a5/Stard5/Nus1/Abca3/Abca5/Entpd1/Aqp8/Soat2/Nucb2/Lcat/Slc10a6/Star
GO:0006096	glycolytic process	13/1687	71/17970	0.014015	Mtch2/Pgam1/Hk1/Gm29667/Eno1b/Ep300/Tigar/Eno4/Adpgk/Hkdc1/Gpd1/Gapdh/Gm12070
GO:0003015	heart process	22/1687	143/17970	0.0141613	Gaa/Kcnq1/Zc3h12a/Tbx2/Tac1/Rangrf/Adm/Hrc/Myl4/Pkp2/Nos1/Popdc2/Slc4a3/Edn2/Gnao1/Kcne3/Ada/Tnni2/Bves/Dsp/Nos3/Tnni1
GO:0006940	regulation of smooth muscle contraction	10/1687	49/17970	0.0142311	Myocd/Gucy1a1/Pawr/Arhgap42/Edn2/Ada/Calcrl/Gper1/Ptger4/Tbxa2r
GO:0034976	response to endoplasmic reticulum stress	24/1687	160/17970	0.0144526	Hspa5/Edem1/Pdx1/Ddx3x/Pomt2/Lpcat3/Dnajc10/Pdia3/Ep300/Creb3l2/Prkn/Gm32340/Erlin1/Wfs1/Sesn2/Ubqln2/Edem2/Tnfrsf10b/Sgtb/Rnf103/Alox15/Ankzf1/Tmx1/Rnft1
GO:0003279	cardiac septum development	14/1687	79/17970	0.0145755	Parva/Wnt5a/Tab1/Tbx2/Bmp4/Ccn1/Luzp1/Ltbp1/Nrp2/Chd7/Pitx2/Stra6/Tgfbr1/Nos3
GO:0009894	regulation of catabolic process	71/1687	585/17970	0.0146038	Mtch2/Pgam1/Edem1/Wnt5a/Poldip2/Fmc1/Zc3h12a/Aurka/Tysnd1/Cul4a/Sesn3/Dda1/Abca2/Dcn/Pik3cg/Ppp2ca/Dhx34/Lonp2/Bmal1/Gm9836/Map3k7/Dtl/Gtpbp1/Caml/Ep300/Hpgd/Cdkn1b/Prkn/Zfp36l2/Csnk2a1-ps3/Irgm2/Ppp1cb/Cpt1a/Serpinb1a/Uchl5/Bnip3l-ps/Herc1/Ppp1r3d/Tigar/Mtmr2/Wac/Mapt/Mylip/Usp30/Ythdf2/Sh3rf2/Tnfaip3/Marchf7/Sesn2/Styx/Ubqln2/Ophn1/Tent5c/Laptm4b/Gpd1/Dapl1/Hnrnpa0/Edem2/Fyco1/Casp1/F8a/Depp1/P…
GO:0016055	Wnt signaling pathway	39/1687	291/17970	0.014856	Rnf213/Leo1/Wnt5a/Frat1/Egr1/Ctnnb1/Ddx3x/Lrp4/Wwox/Fgf9/Dkk3/Nrarp/Ror2/Dkk2/Bmal1/Adgra2/Tcf7l1/Pitx2/Prkn/Frat2/Zbed3/Wnt9b/Tmem198b/Csnk2a1-ps3/Draxin/Hnf1b/Rab5a/Tnfaip3/Tnks/Lgr4/Wnt5b/Grem1/Rnf146/Atp6ap2/Usp47/Rspo1/Rspo3/Prkaa2/Gm31391
GO:0072594	establishment of protein localization to organelle	39/1687	291/17970	0.014856	Mtch2/Hspa5/Edem1/Zc3h12a/Hk1/Pom121/Fgf9/Bmp4/Srp54c/Timm9/Ppp2ca/Lonp2/Bmal1/Timm17b/Ep300/Gm30251/Ipo4/Tram1/Samm50/Bnip3l-ps/Terf1/Cct4/Ssr3/Gm32340/Mapt/Mavs/Tnfaip3/Gm20604/Ophn1/Tmco6/Zfyve16/Kpna4/Gper1/Sgtb/Sort1/Srp54a/Hspa1l/Dnaja1/Pex1
GO:0042759	long-chain fatty acid biosynthetic process	4/1687	11/17970	0.0148969	Elovl6/Acot7/Fads1/Alox15
GO:0048172	regulation of short-term neuronal synaptic plasticity	4/1687	11/17970	0.0148969	Syngr1/Syp/Shisa8/Unc13b
GO:0061469	regulation of type B pancreatic cell proliferation	4/1687	11/17970	0.0148969	Fmc1/Birc5/Nr4a1/Reg1
GO:0090030	regulation of steroid hormone biosynthetic process	4/1687	11/17970	0.0148969	Dkk3/Dgkq/H6pd/Pde8b
GO:0010942	positive regulation of cell death	60/1687	483/17970	0.0150735	Mtch2/Pdx1/Wnt5a/Egr1/Ctnnb1/Ddx3x/Mmp2/Zc3h12a/Wwox/Ppm1f/Degs1/Bmp4/Ccn1/Inhba/Tac1/Zfp13/Kmo/Adm/Aldh1a1/Ppp2ca/Chchd10/Pdia3/Casp8/Pawr/Ep300/Hpgd/Cdkn1b/Elk1/Nr4a1/Prkn/Melk/Klf11/Gm8283/COX2/Nos1/Bcl6/Bnip3l-ps/Il18/Tigar/Mapt/Nqo2/Zfp346/Gm20604/Syce3/Stk17b/Casp8ap2/Adam10/Map3k20/Tnfrsf10b/Gper1/Septin4/Casp1/Sort1/Gramd4/C6/Dusp6/Tgfbr1/Dnaja1/Unc13b/Nos3
GO:1901615	organic hydroxy compound metabolic process	47/1687	364/17970	0.0154781	Mtch2/Cyp4f40/Pcbd2/Wnt5a/Sord/Lpcat3/Impa1/Dkk3/Rdh12/Abca2/Ppip5k1/Fdps/Ddc/Aldh1a1/Duoxa2/Maob/Dgkq/Slc5a3/Prkn/Dhcr7/Slco4a1/H6pd/Pdxp/Per2/Pcbd1/Tigar/Amacr/Erlin1/Mtmr2/Nus1/Ldhd/Insig2/Gm31597/Cyp4f18/Soat2/Gpd1/Lcat/Gper1/Mogat2/Hmgcr/Tyr/Cyp46a1/Alox15/Gm32342/Cpq/Mecp2/Star
GO:0031346	positive regulation of cell projection organization	37/1687	274/17970	0.0155106	Fbxo31/Hspa5/Wnt5a/Cyfip1/Dynlt1c/Rims2/Bmp4/Ror2/Cep135/Ep300/Prkn/Ppp1r9a/Pcp4/Amigo1/Cpne9/Tmem106b/Map3k13/Mapt/Reg1/Ss18l1/Cul7/Ttbk2/Nptn/Slc23a2/F2rl1/Zmynd10/Adnp/Avil/Cntn1/Dock11/Dpysl2/Megf8/Tgfbr1/Mns1/Zfyve27/Cbfa2t2/Mecp2
GO:0035196	production of miRNAs involved in gene silencing by miRNA	7/1687	29/17970	0.0156405	Zc3h12a/Bmp4/Myocd/Mrpl44/Pus10/Bcdin3d/Mecp2
GO:0042181	ketone biosynthetic process	7/1687	29/17970	0.0156405	Egr1/Dkk3/Coq6/Pdss2/Dgkq/H6pd/Star
GO:0045773	positive regulation of axon extension	7/1687	29/17970	0.0156405	Cyfip1/Ep300/Map3k13/Mapt/Adnp/Megf8/Zfyve27
GO:0006757	ATP generation from ADP	13/1687	72/17970	0.0156773	Mtch2/Pgam1/Hk1/Gm29667/Eno1b/Ep300/Tigar/Eno4/Adpgk/Hkdc1/Gpd1/Gapdh/Gm12070
GO:0044772	mitotic cell cycle phase transition	36/1687	266/17970	0.0162639	Ccnd1/Fbxo31/Phf8/Ctc1/Cdc25a/Ddx3x/Ccni/Cul4a/Mad1l1/Inhba/Riok2/Cenpf/Birc5/Dtl/Nes/Zwint/Cdkn1b/Zfp36l2/Cdkn1c/Klf11/Gm33950/Ticrr/Spast/Wac/Zfp655/E2f5/Spdl1/Ccne2/Tcf19/Usp47/Xrcc3/2700099C18Rik/Atad5/Kat14/Rbl2/Mecp2
GO:0030433	ubiquitin-dependent ERAD pathway	10/1687	50/17970	0.016335	Hspa5/Edem1/Dnajc10/Erlin1/Wfs1/Ubqln2/Edem2/Sgtb/Rnf103/Ankzf1
GO:0050810	regulation of steroid biosynthetic process	10/1687	50/17970	0.016335	Egr1/Lpcat3/Dkk3/Fdps/Dgkq/Dhcr7/H6pd/Pde8b/Erlin1/Star
GO:0006936	muscle contraction	28/1687	196/17970	0.0163948	Gaa/Smpd3/Kcnq1/Arg2/Zc3h12a/Tbx2/Myocd/Rangrf/Gucy1a1/Pawr/Hspb6/Nr4a1/Myl4/Pkp2/Arhgap42/Nos1/Ndufs6b/Edn2/Kcne3/Ada/Calcrl/Gper1/Ptger4/Tnnt3/Tnni2/Dsp/Tbxa2r/Tnni1
GO:0060070	canonical Wnt signaling pathway	28/1687	196/17970	0.0163948	Wnt5a/Frat1/Egr1/Ctnnb1/Ddx3x/Lrp4/Fgf9/Dkk3/Nrarp/Ror2/Dkk2/Bmal1/Adgra2/Tcf7l1/Prkn/Zbed3/Wnt9b/Tmem198b/Draxin/Rab5a/Tnks/Lgr4/Grem1/Rnf146/Atp6ap2/Usp47/Rspo1/Gm31391
GO:0071320	cellular response to cAMP	8/1687	36/17970	0.0165371	Hspa5/Kcnq1/Pik3cg/Slc26a6/Slc26a3/Aqp8/Gpd1/Star
GO:1902930	regulation of alcohol biosynthetic process	8/1687	36/17970	0.0165371	Lpcat3/Dkk3/Fdps/Dgkq/Dhcr7/H6pd/Erlin1/Gper1
GO:0010821	regulation of mitochondrion organization	17/1687	104/17970	0.0165967	Aurka/Zfp13/Dcn/Chchd10/Ep300/Prkn/Adck1/Myo19/Bnip3l-ps/Tigar/Mapt/Usp30/Mief1/Rhot1/Gm20604/Gper1/Hspa1l
GO:0016579	protein deubiquitination	17/1687	104/17970	0.0165967	Zc3h12a/Josd1/Usp1/Usp15/Usp43/Eif3f/Uchl5/Usp22/Uchl1/Usp30/Gm12444/Tnfaip3/Usp47/Otud7a/Usp14/Atxn7l3/Trim21
GO:0061844	antimicrobial humoral immune response mediated by antimicrobial peptide	17/1687	104/17970	0.0165967	Ltf/Tac1/Adm/Reg3a/Npy/H2bc12/Ccl20/Pglyrp1/H2bc21/Reg1/Defa37/Ccl22/Pgc/Defa23/Defa35/Ccl28/Defa34
GO:0014911	positive regulation of smooth muscle cell migration	9/1687	43/17970	0.0166745	Tmsb4x/Egr1/Gm12854/Fgf9/Il18/Rab5a/Postn/Ptger4/Rapgef4
GO:0048168	regulation of neuronal synaptic plasticity	9/1687	43/17970	0.0166745	Egr1/Syngr1/Syp/Rab5a/Shisa8/Nptn/Egr2/Unc13b/Star
GO:0030111	regulation of Wnt signaling pathway	29/1687	205/17970	0.0167464	Rnf213/Wnt5a/Frat1/Egr1/Ddx3x/Lrp4/Wwox/Fgf9/Dkk3/Nrarp/Ror2/Dkk2/Bmal1/Adgra2/Prkn/Zbed3/Tmem198b/Csnk2a1-ps3/Draxin/Hnf1b/Tnfaip3/Tnks/Lgr4/Grem1/Rnf146/Atp6ap2/Usp47/Rspo1/Rspo3
GO:0034446	substrate adhesion-dependent cell spreading	12/1687	65/17970	0.0167642	Parva/Itga8/Lamb2/Tyro3/Ephb3/Lamb3/Dock1/Postn/Akip1/Srcin1/Bves/Olfm4
GO:0036503	ERAD pathway	12/1687	65/17970	0.0167642	Hspa5/Edem1/Pomt2/Dnajc10/Erlin1/Wfs1/Ubqln2/Edem2/Sgtb/Rnf103/Ankzf1/Rnft1
GO:0006536	glutamate metabolic process	6/1687	23/17970	0.0169281	Fpgs/Nags/Hal/Aldh5a1/Gls2/Dglucy
GO:0044342	type B pancreatic cell proliferation	6/1687	23/17970	0.0169281	Fmc1/Birc5/Nr4a1/Serpinb1a/Reg1/Tcf19
GO:0045686	negative regulation of glial cell differentiation	6/1687	23/17970	0.0169281	Ctnnb1/Dab1/Nkx6-2/Bmp4/Tmem98/Mecp2
GO:0002097	tRNA wobble base modification	5/1687	17/17970	0.0171704	Ctu1/Mto1/Kti12/Trmt9b/Elp1
GO:0010464	regulation of mesenchymal cell proliferation	5/1687	17/17970	0.0171704	Wnt5a/Ctnnb1/Fgf9/Bmp4/Zeb1
GO:0030859	polarized epithelial cell differentiation	5/1687	17/17970	0.0171704	Wnt5a/Sh3bp1/Lama1/Tcf15/Ophn1
GO:0048863	stem cell differentiation	23/1687	154/17970	0.0171963	Pdx1/Batf/Ctnnb1/Tbx2/Bmp4/Myocd/Nrp2/Pitx2/Tcf15/Sema6c/Zfp36l2/Ell3/Mtf2/Sox8/Hnf1b/Snora73b/Ythdf2/Grem1/Pwp1/Lbh/Bche/Foxc1/Gm32342
GO:0007015	actin filament organization	43/1687	330/17970	0.0172515	Tmsb4x/Marcks/Cyfip1/Kptn/Wipf1/Tmod3/Ppm1f/Tac1/Cd2ap/Sh3bp1/Eps8/Shroom1/Pawr/Washc3/Prkn/Ppp1r9a/Zbed3/Sptbn2/Gm52861/Pdxp/Myo19/Sh3pxd2b/Arhgap6/Abi1/Sorbs3/Limch1/Capza2/F2rl1/Plekhh2/Sh3kbp1/Ptger4/Sirpa/Avil/Abitram/Ppp1r9b/Wasl/Alox15/Dpysl2/Gm40363/Gm53330/Tgfbr1/Synpo2/Actr3
GO:0198738	cell-cell signaling by wnt	39/1687	294/17970	0.017317	Rnf213/Leo1/Wnt5a/Frat1/Egr1/Ctnnb1/Ddx3x/Lrp4/Wwox/Fgf9/Dkk3/Nrarp/Ror2/Dkk2/Bmal1/Adgra2/Tcf7l1/Pitx2/Prkn/Frat2/Zbed3/Wnt9b/Tmem198b/Csnk2a1-ps3/Draxin/Hnf1b/Rab5a/Tnfaip3/Tnks/Lgr4/Wnt5b/Grem1/Rnf146/Atp6ap2/Usp47/Rspo1/Rspo3/Prkaa2/Gm31391
GO:0030031	cell projection assembly	50/1687	394/17970	0.0173466	Parva/Kcnq1/Cyfip1/Sh3bp1/Cep135/Jhy/Cep162/Pcm1/Txndc15/Ppp1r9a/Iqcb1/Itgb4/Emp1/Gorab/Ift56/Togaram1/Galnt11/Gm47324/Vstm5/Pld1/Dnaaf2/Gas8/Ptpdc1/Rab5a/Epha2/Fam161a/Cdh13/Wdpcp/Dnaaf1/Cfap157/Vdac3/Odf2l/Ttbk2/Tbc1d30/Cep19/Bbof1/F2rl1/Armc2/Zmynd10/Mapre1/2700049A03Rik/Avil/Abitram/Dock11/Ppp1r9b/Dpysl2/Tgfbr1/Mns1/Macir/Cep290
GO:1901342	regulation of vasculature development	32/1687	232/17970	0.0175364	Wnt5a/Egr1/Ctnnb1/Zc3h12a/Fgf9/Bmp4/Myocd/Fkbpl/Adm/Dcn/Cth/Adgra2/Spry2/Hspb6/Ddah1/Rin2/Smoc2/Epha2/Grem1/Erap1/Adam10/Pgf/Gper1/Ptger4/Foxc1/Pik3r6/C6/Spred1/Tbxa2r/Nos3/Gpr4/Mecp2
GO:0048659	smooth muscle cell proliferation	19/1687	121/17970	0.0176496	Smpd3/Poldip2/Egr1/Ctnnb1/Mmp2/Fgf9/Bmp4/Myocd/Hpgd/Cdkn1b/Il18/Nqo2/Rab5a/Cdh13/Tnfaip3/Calcrl/Gper1/Zfp143/Nos3
GO:0061572	actin filament bundle organization	19/1687	121/17970	0.0176496	Marcks/Ppm1f/Tac1/Eps8/Shroom1/Pawr/Prkn/Ppp1r9a/Gm52861/Pdxp/Sh3pxd2b/Arhgap6/Limch1/Ptger4/Dpysl2/Gm40363/Gm53330/Tgfbr1/Synpo2
GO:0140014	mitotic nuclear division	29/1687	206/17970	0.0177993	Smpd3/Nme6/Poldip2/Aurka/Bmp4/Mad1l1/Riok2/Birc5/Prc1/Rec8/Zwint/Cdkn1b/Cdkn1c/Gm33950/Pdxp/Spast/Togaram1/Ndel1/Mzt1/Tnks/Spdl1/Nsl1/Cul7/Xrcc3/2700099C18Rik/Togaram2/Tgfa/Spice1/Sgo2a
GO:0030334	regulation of cell migration	73/1687	610/17970	0.0181126	Tmsb4x/Fbxo31/Smpd3/Hspa5/Wdr44/Wnt5a/Egr1/Cldn3/Mmp2/Zc3h12a/Eppk1/Mgat5/Gm12854/Ppm1f/Fgf9/Bmp4/Myocd/Ccn1/Tac1/Dcn/Pik3cg/Sh3bp1/Mtus1/Lama1/Ror2/Atoh8/Patz1/Adgra2/Pawr/Adgrg1/Spry2/Pitx2/Rin2/Sema6c/Ccl20/Pkp2/Meak7/Smoc2/Il18/Limch1/Edn2/Nus1/Rab5a/Epha2/Atp5b/Cdh13/Sh3rf2/Dock1/Wdpcp/Postn/Grem1/Ttbk2/Ada/Adam10/F2rl1/Pgf/Gper1/Ptger4/Rapgef4/Fut7/Srcin1/Tnfrsf18/Prr5l/Spred1/Dpysl2/Tgfbr1…
GO:0006090	pyruvate metabolic process	15/1687	89/17970	0.0181605	Mtch2/Pgam1/Pdhx/Hk1/Gm29667/Mpc1/Eno1b/Ep300/Tigar/Eno4/Adpgk/Hkdc1/Gpd1/Gapdh/Gm12070
GO:0050804	modulation of chemical synaptic transmission	41/1687	313/17970	0.0181809	Egr1/Cyfip1/Rims2/Syngr1/Grin2d/Kcnb1/Igsf9b/Tac1/Kmo/Ror2/Gucy1a1/Plcb4/Slc30a1/Prkn/Ppp1r9a/Syp/Sipa1l1/Nos1/Begain/Gip/1700034H15Rik/Mtmr2/Mapt/Rab5a/Rhot1/Ophn1/Shisa8/Nptn/Adnp/Gper1/Bche/Ptger4/Rapgef4/Adcy1/Kcnc3/Egr2/Cyp46a1/Ppp1r9b/Unc13b/Mecp2/Star
GO:0033002	muscle cell proliferation	23/1687	155/17970	0.0184578	Smpd3/Poldip2/Egr1/Ctnnb1/Mmp2/Tbx2/Fgf9/Bmp4/Myocd/Hpgd/Cdkn1b/Six5/Il18/Nqo2/Rab5a/Cdh13/Tnfaip3/Calcrl/Gper1/Zfp143/Foxc1/Tgfbr1/Nos3
GO:0035195	gene silencing by miRNA	10/1687	51/17970	0.0186606	Zc3h12a/Wtip/Bmp4/Myocd/Mrpl44/Pus10/Ago4/Bcdin3d/Ago1/Mecp2
GO:1901607	alpha-amino acid biosynthetic process	10/1687	51/17970	0.0186606	Enoph1/Nags/Cth/Gls2/Pycr1/Cbs/Asns/Otc/Shmt1/Psat1
GO:0021587	cerebellum morphogenesis	7/1687	30/17970	0.0187906	Hspa5/Dab1/Gnpat/Sptbn2/Herc1/Faim2/Ophn1
GO:1903523	negative regulation of blood circulation	7/1687	30/17970	0.0187906	Mmp2/Zc3h12a/Tac1/Adm/Arhgap42/Nos1/Kcne3
GO:0051129	negative regulation of cellular component organization	66/1687	545/17970	0.0188275	Tmsb4x/Ywhah/Phf8/Hspa5/Snph/Nme6/Wnt5a/Ctc1/Katna1/Ddx3x/Dab1/Lrp4/Tmod3/Gm13612/Bmp4/Mad1l1/Abca2/Eps8/Birc5/Map3k7/Mid1/Spry2/Ep300/Zwint/Prkn/Sema6c/Wapl/Ppp1r9a/Sptbn2/Fstl4/Adck1/Arhgap6/Aatk/Draxin/Per2/Tigar/Terf1/Mtf2/Mtmr2/Mapt/Mylip/Usp30/Capza2/Postn/Tnks/Spdl1/Odf2l/Ubqln2/Msx3/Ttbk2/Tbc1d30/Mapre1/Plekhh2/Nbdy/Ptger4/Avil/Xrcc3/2700099C18Rik/Dnmt3b/Dcp2/Pif1/Pacsin3/Ankrd13b/Cbfa2t2…
GO:0034097	response to cytokine	76/1687	640/17970	0.0190674	Smpd3/Hspa5/Pdx1/Wnt5a/Ifitm2/Egr1/Zc3h12a/Syngr1/Mpc1/Kmo/Eno1b/Ppp2ca/Ifit1bl2/Pdia3/Shfl/Srm/Nmnat3/Casp8/Traf3/Cth/Ccl8/Slc26a6/Nrp2/Spry2/Ifit3/Spock2/Prkn/Slc27a1/Zfp36l2/Ccl20/Ccl9/Gbp3/Prlr/Mrpl15/H2bc21/Il22ra2/Il3ra/Irgm2/Pla2g5/Il18/Mtf2/C1qtnf4/Edn2/Il20rb/Reg1/Ythdf2/Dcst1/Gnao1/Atp5b/Ccl22/Mavs/Postn/F830016B08Rik/Adam23/Cxcl11/Gpd1/Adam10/F2rl1/Serpina3g/Jagn1/Gper1/Card14/Foxc1/Ca…
GO:0099177	regulation of trans-synaptic signaling	41/1687	314/17970	0.0190769	Egr1/Cyfip1/Rims2/Syngr1/Grin2d/Kcnb1/Igsf9b/Tac1/Kmo/Ror2/Gucy1a1/Plcb4/Slc30a1/Prkn/Ppp1r9a/Syp/Sipa1l1/Nos1/Begain/Gip/1700034H15Rik/Mtmr2/Mapt/Rab5a/Rhot1/Ophn1/Shisa8/Nptn/Adnp/Gper1/Bche/Ptger4/Rapgef4/Adcy1/Kcnc3/Egr2/Cyp46a1/Ppp1r9b/Unc13b/Mecp2/Star
GO:1901606	alpha-amino acid catabolic process	24/1687	164/17970	0.0191049	Prodh/Arg2/Acadsb/Kmo/Gm46829/Ddah1/Gm31349/Gm9199/Gm36787/Nos1/Gm54336/Hal/Gls2/Gm16702/Kynu/Gm36375/Gm41608/Gm36279/Ddah2/Kyat3/Gm42245/Otc/Nos3/Gm41450
GO:0000281	mitotic cytokinesis	9/1687	44/17970	0.0192671	Poldip2/Myh10/Snx18/Cenpa/Birc5/Spast/Cep55/Cul7/Kif20a
GO:0016239	positive regulation of macroautophagy	9/1687	44/17970	0.0192671	Sesn3/Dcn/Map3k7/Prkn/Irgm2/Bnip3l-ps/Wac/Sesn2/Fyco1
GO:1990874	vascular smooth muscle cell proliferation	8/1687	37/17970	0.0194115	Poldip2/Mmp2/Fgf9/Myocd/Hpgd/Cdkn1b/Nqo2/Gper1
GO:0060840	artery development	13/1687	74/17970	0.0194469	Tab1/Tbx2/Bmp4/Myocd/Luzp1/Ltbp1/Hpgd/Chd7/Sec24b/Stra6/Ptger4/Foxc1/Tgfbr1
GO:0010975	regulation of neuron projection development	46/1687	360/17970	0.0195053	Ywhah/Fbxo31/Hspa5/Wnt5a/Katna1/Dab1/Lrp4/Cyfip1/Dynlt1c/Rims2/Bmp4/Ror2/Ep300/Prkn/Sema6c/Ppp1r9a/Pcp4/Sipa1l1/Amigo1/Cpne9/Ephb3/Fstl4/Aatk/Draxin/Tmem106b/Map3k13/Mapt/Mylip/Reg1/Gm46764/Wdr36/Ss18l1/Cul7/Nptn/Slc23a2/Adam10/Adnp/Rapgef4/Srcin1/Avil/Cntn1/Dpysl2/Megf8/Zfyve27/Cbfa2t2/Mecp2
GO:0046939	nucleotide phosphorylation	14/1687	82/17970	0.019817	Mtch2/Pgam1/Hk1/Gm29667/Eno1b/Ep300/Tigar/Eno4/Adpgk/Hkdc1/Dck/Gpd1/Gapdh/Gm12070
GO:0051248	negative regulation of protein metabolic process	81/1687	689/17970	0.0199013	Lamtor5/Rnf34/Ctnnb1/Ddx3x/Zc3h12a/Dynlt1c/Mgat5/Dnajc10/Gm13612/Ppia/Ppm1f/Ltf/Bmp4/Myocd/Malsu1/Naip1/Ppp2ca/Ywhab/Birc5/Shfl/Hexim2/Dgkq/Spry2/Caml/Ep300/Cdkn1b/Nr4a1/Prkn/Zfp36l2/Cdkn1c/Prmt3/Zbed3/Pcp4/Nos1/Csnk2a1-ps3/Caprin1/Patl1/Mvp/Per2/Serpinb1a/Uchl5/Il18/Mtf2/Wac/Mapt/Ythdf2/Crtap/Sh3rf2/Tnfaip3/Tmem98/Marchf7/Sesn2/Styx/Msx3/Ophn1/Grem1/Laptm4b/F2rl1/Serpina3g/Ago4/Ncoa7/Pwp1/Gper1/…
GO:0060271	cilium assembly	34/1687	252/17970	0.019912	Parva/Kcnq1/Cep135/Jhy/Cep162/Pcm1/Txndc15/Iqcb1/Gorab/Ift56/Togaram1/Galnt11/Gm47324/Dnaaf2/Gas8/Ptpdc1/Fam161a/Wdpcp/Dnaaf1/Cfap157/Vdac3/Odf2l/Ttbk2/Tbc1d30/Cep19/Bbof1/Armc2/Zmynd10/Mapre1/2700049A03Rik/Avil/Mns1/Macir/Cep290
GO:0016441	posttranscriptional gene silencing	11/1687	59/17970	0.0200643	Zc3h12a/Wtip/Bmp4/Myocd/Mrpl44/Pus10/Ago4/Prkra/Bcdin3d/Ago1/Mecp2
GO:1903578	regulation of ATP metabolic process	11/1687	59/17970	0.0200643	Mtch2/Pgam1/Cox7a1/Dnajc30/Ep300/Prkn/COX2/Tigar/Entpd1/Slc25a33/Gpd1
GO:0051345	positive regulation of hydrolase activity	48/1687	379/17970	0.0200679	Mtch2/Wnt5a/Cldn3/Ddx3x/Dnajc10/Ppm1f/Gpihbp1/Snx18/Ccn1/Arf4/Ppp2ca/Sh3bp1/Gpr55/Casp8/Ccl8/Pawr/Dennd1b/Gmip/Fgfr3/Ccl20/Ccl9/Myl4/Gnb5/Sipa1l1/Arhgap42/Arhgap29/Arhgap6/Tmem106b/Ddx11/Mmut/Epha2/Gnao1/Arhgap11a/Ccl22/Prtn3/Tbc1d30/Casp8ap2/F2rl1/Chtop/Tnfrsf10b/Gper1/Tnnt3/Casp1/Gramd4/Dock11/Gm40855/Tbc1d2/Rgl3
GO:0042180	cellular ketone metabolic process	24/1687	165/17970	0.0204338	Cyp4f40/Egr1/Tysnd1/Dkk3/Coq6/Pdss2/Kmo/Lonp2/Dgkq/Hpgd/Prmt3/H6pd/Gip/Cpt1a/Elovl5/Erlin1/Kynu/Nqo2/Cyp4f18/Gpd1/Nucb2/Kyat3/Cyp46a1/Star
GO:0006122	mitochondrial electron transport, ubiquinol to cytochrome c	4/1687	12/17970	0.0207118	Uqcrc1/Uqcrq/Gm6293/Uqcrb
GO:0006828	manganese ion transport	4/1687	12/17970	0.0207118	Slc30a10/Tmem165/Mmgt2/Atp2c2
GO:0007494	midgut development	4/1687	12/17970	0.0207118	Wnt5a/Dab1/Reg1/Otc
GO:0030810	positive regulation of nucleotide biosynthetic process	4/1687	12/17970	0.0207118	Prkn/COX2/Nos1/Nos3
GO:0043173	nucleotide salvage	4/1687	12/17970	0.0207118	Uck2/Ampd2/Ampd3/Ada
GO:0061213	positive regulation of mesonephros development	4/1687	12/17970	0.0207118	Bmp4/Sox8/Lgr4/Grem1
GO:0072283	metanephric renal vesicle morphogenesis	4/1687	12/17970	0.0207118	Ctnnb1/Bmp4/Wnt9b/Grem1
GO:0090190	positive regulation of branching involved in ureteric bud morphogenesis	4/1687	12/17970	0.0207118	Bmp4/Sox8/Lgr4/Grem1
GO:1900373	positive regulation of purine nucleotide biosynthetic process	4/1687	12/17970	0.0207118	Prkn/COX2/Nos1/Nos3
GO:1901213	regulation of transcription from RNA polymerase II promoter involved in heart development	4/1687	12/17970	0.0207118	Tbx2/Bmp4/Myocd/Grem1
GO:1905063	regulation of vascular smooth muscle cell differentiation	4/1687	12/17970	0.0207118	Fgf9/Myocd/Cth/Gper1
GO:2000232	regulation of rRNA processing	4/1687	12/17970	0.0207118	Riok2/Wdr75/Ythdf2/Utp15
GO:0070925	organelle assembly	71/1687	595/17970	0.0207271	Parva/Krt19/Nop2/Poldip2/Kcnq1/Atg2b/Ddx3x/Aurka/Hps4/Cenpa/Tubgcp4/Rab19/Rnf4/Haus2/Cep135/Prc1/Ep300/Jhy/Cep162/Pcm1/Txndc15/Cep295/Iqcb1/Sipa1l1/Lrfn4/Irgm2/Sh3pxd2b/Gorab/Ift56/Togaram1/Patl1/Galnt11/Gm47324/Lrrc4b/Dnaaf2/Gas8/Tmem41b/Mzt1/Ptpdc1/Ythdf2/Abca3/Fam161a/Wdpcp/Dnaaf1/Tnks/Cfap157/Vdac3/Odf2l/Ubqln2/Ttbk2/Tbc1d30/Cep19/Bbof1/Armc2/Zmynd10/Mapre1/2700049A03Rik/Mrps2/Nbdy/Avil/27000…
GO:0097345	mitochondrial outer membrane permeabilization	6/1687	24/17970	0.0208226	Zfp13/Chchd10/Bnip3l-ps/Eya2/Rhot1/Gm20604
GO:0006520	cellular amino acid metabolic process	48/1687	380/17970	0.0209463	Prodh/Arg2/Fpgs/Enoph1/Acadsb/Kmo/Ddc/Aldh1a1/Nags/Cth/Gatc/Gm46829/Ddah1/Gm31349/Agmat/Gm9199/Gm36787/Dars2/Nos1/Gm54336/Hal/Aldh5a1/Vars2/Gls2/Gm16702/Pycr1/Kynu/Gm36375/Aars2/Gm41608/Mmut/Hpdl/Upb1/Cbs/Gm36279/Ddah2/Kyat3/Gm42245/LOC115488500/Farsb/Asns/Otc/Shmt1/Dglucy/Psat1/Nos3/Mecp2/Gm41450
GO:0009063	cellular amino acid catabolic process	25/1687	174/17970	0.0209951	Prodh/Arg2/Acadsb/Kmo/Gm46829/Ddah1/Gm31349/Gm9199/Gm36787/Nos1/Gm54336/Hal/Aldh5a1/Gls2/Gm16702/Kynu/Gm36375/Gm41608/Gm36279/Ddah2/Kyat3/Gm42245/Otc/Nos3/Gm41450
GO:0099175	regulation of postsynapse organization	12/1687	67/17970	0.0210012	Wnt5a/Lrp4/Arf4/Nrp2/Ppp1r9a/Sipa1l1/Lrfn4/Lrrc4b/Adam10/Rapgef4/Srcin1/Abhd17b
GO:0001655	urogenital system development	36/1687	271/17970	0.0211188	Wnt5a/Egr1/Itga8/Ctnnb1/Arg2/Lrp4/Mmp2/Bmp4/Myocd/Lamb2/Cenpf/Dcn/Hpgd/Nup160/Cdkn1b/Cdkn1c/Prlr/Wnt9b/Ndufs6b/Ephb3/Smad9/Stra6/Sox8/Hnf1b/Wfs1/Wdpcp/Lgr4/Grem1/Pgf/Nfia/Glis2/Foxc1/Tmed10-ps/Tgfbr1/Gpr4/Cep290
GO:0031400	negative regulation of protein modification process	50/1687	399/17970	0.0214317	Ctnnb1/Zc3h12a/Dynlt1c/Mgat5/Dnajc10/Ppia/Ppm1f/Bmp4/Myocd/Ppp2ca/Ywhab/Hexim2/Dgkq/Spry2/Caml/Cdkn1b/Prkn/Cdkn1c/Prmt3/Zbed3/Pcp4/Nos1/Mvp/Per2/Il18/Mtf2/Mapt/Crtap/Sh3rf2/Tnfaip3/Marchf7/Msx3/Grem1/F2rl1/Ncoa7/Pwp1/Gper1/Sirpa/Prr5l/Spred1/Dnmt3b/Ppp1r9b/Sh3gl2/Ocln/Dusp6/Dnaja1/Trim21/Ibtk/Cblb/Terf2ip
GO:0043624	cellular protein complex disassembly	17/1687	107/17970	0.0215103	Tmod3/Sh3bp1/Eps8/Shfl/Mid1/Nes/Sptbn2/Pdxp/Spast/Jmjd4/Capza2/Ttbk2/F2rl1/Plekhh2/Avil/Ppp1r9b/Sh3gl2
GO:0000052	citrulline metabolic process	3/1687	7/17970	0.0216493	Ddah1/Ddah2/Otc
GO:0001778	plasma membrane repair	3/1687	7/17970	0.0216493	Trim72/Lman2l/Fer1l5
GO:0002314	germinal center B cell differentiation	3/1687	7/17970	0.0216493	Cdh17/Pou2af1/Ada
GO:0003256	regulation of transcription from RNA polymerase II promoter involved in myocardial precursor cell differentiation	3/1687	7/17970	0.0216493	Tbx2/Myocd/Grem1
GO:0006335	DNA replication-dependent nucleosome assembly	3/1687	7/17970	0.0216493	Nasp/Ipo4/Chaf1b
GO:0006563	L-serine metabolic process	3/1687	7/17970	0.0216493	Cbs/Shmt1/Psat1
GO:0010728	regulation of hydrogen peroxide biosynthetic process	3/1687	7/17970	0.0216493	Zfp13/Duoxa2/COX2
GO:0031943	regulation of glucocorticoid metabolic process	3/1687	7/17970	0.0216493	Dkk3/Dgkq/H6pd
GO:0032261	purine nucleotide salvage	3/1687	7/17970	0.0216493	Ampd2/Ampd3/Ada
GO:0034091	regulation of maintenance of sister chromatid cohesion	3/1687	7/17970	0.0216493	Gm33950/Tnks/Sgo2a
GO:0034214	protein hexamerization	3/1687	7/17970	0.0216493	Spast/Yme1l1/Lrrc8d
GO:0034651	cortisol biosynthetic process	3/1687	7/17970	0.0216493	Dkk3/Dgkq/H6pd
GO:0034723	DNA replication-dependent nucleosome organization	3/1687	7/17970	0.0216493	Nasp/Ipo4/Chaf1b
GO:0035581	sequestering of extracellular ligand from receptor	3/1687	7/17970	0.0216493	Ltbp1/Grem1/Grem2
GO:0036151	phosphatidylcholine acyl-chain remodeling	3/1687	7/17970	0.0216493	Lpcat3/Mboat2/Pla2g4c
GO:0045110	intermediate filament bundle assembly	3/1687	7/17970	0.0216493	Eppk1/Nefm/Pkp2
GO:0045876	positive regulation of sister chromatid cohesion	3/1687	7/17970	0.0216493	Gm33950/Ddx11/Sgo2a
GO:0045988	negative regulation of striated muscle contraction	3/1687	7/17970	0.0216493	Arg2/Zc3h12a/Kcne3
GO:0051182	coenzyme transport	3/1687	7/17970	0.0216493	Slc27a1/Slc25a26/Slc23a2
GO:0090070	positive regulation of ribosome biogenesis	3/1687	7/17970	0.0216493	Riok2/Wdr75/Utp15
GO:1900115	extracellular regulation of signal transduction	3/1687	7/17970	0.0216493	Ltbp1/Grem1/Grem2
GO:1900116	extracellular negative regulation of signal transduction	3/1687	7/17970	0.0216493	Ltbp1/Grem1/Grem2
GO:1902645	tertiary alcohol biosynthetic process	3/1687	7/17970	0.0216493	Dkk3/Dgkq/H6pd
GO:1905065	positive regulation of vascular smooth muscle cell differentiation	3/1687	7/17970	0.0216493	Myocd/Cth/Gper1
GO:2000234	positive regulation of rRNA processing	3/1687	7/17970	0.0216493	Riok2/Wdr75/Utp15
GO:0048167	regulation of synaptic plasticity	20/1687	132/17970	0.0217667	Egr1/Rims2/Syngr1/Grin2d/Kcnb1/Ppp1r9a/Syp/Sipa1l1/Nos1/Gip/Mapt/Rab5a/Shisa8/Nptn/Adcy1/Egr2/Cyp46a1/Unc13b/Mecp2/Star
GO:0007264	small GTPase mediated signal transduction	42/1687	326/17970	0.021872	Dab1/Cyfip1/Rhobtb2/Bnip2/Rangrf/Rit1/Gdi2/Stard8/Pik3cg/Cd2ap/Sh3bp1/Gpr55/Gpr20/Gm38514/Adgrg1/Spry2/Gm15337/Arhgap32/Sipa1l1/Arhgap42/Ralgps1/Bcl6/Rab9/Aatk/F2rl2/Snora73b/Shoc2/Rab33b/Cdh13/Dock1/Ophn1/Cdc42bpa/Nucb2/F2rl1/Rasgrp3/Rapgef4/Ctnnal1/Dock11/Gm52186/Gpr4/Dennd4c/Rgl3
GO:0051261	protein depolymerization	15/1687	91/17970	0.0218979	Tmod3/Sh3bp1/Eps8/Mid1/Nes/Sptbn2/Pdxp/Spast/Capza2/Ttbk2/F2rl1/Plekhh2/Avil/Ppp1r9b/Sh3gl2
GO:0030324	lung development	22/1687	149/17970	0.0219579	Smpd3/Wnt5a/Tab1/Ctnnb1/Crispld2/Fgf9/Bmp4/Myocd/Lama1/Spry2/Ep300/Pitx2/Elk1/Dhcr7/Sec24b/Stra6/Mgp/Edn2/Abca3/Dnaaf1/Ada/Nos3
GO:0006691	leukotriene metabolic process	5/1687	18/17970	0.0219774	Cyp4f40/Lta4h/Pla2g5/Cyp4f18/Mgst2
GO:0035089	establishment of apical/basal cell polarity	5/1687	18/17970	0.0219774	Wnt5a/Sh3bp1/Lama1/Tcf15/Ophn1
GO:0045603	positive regulation of endothelial cell differentiation	5/1687	18/17970	0.0219774	Ctnnb1/Bmp4/Atoh8/Akap11/Proc
GO:0046058	cAMP metabolic process	5/1687	18/17970	0.0219774	Adcy6/Pde8b/Epha2/Adcy4/Adcy1
GO:0031329	regulation of cellular catabolic process	60/1687	493/17970	0.022109	Pgam1/Edem1/Poldip2/Zc3h12a/Aurka/Tysnd1/Sesn3/Dda1/Abca2/Dcn/Pik3cg/Dhx34/Lonp2/Gm9836/Map3k7/Gtpbp1/Caml/Hpgd/Prkn/Zfp36l2/Csnk2a1-ps3/Irgm2/Ppp1cb/Cpt1a/Uchl5/Bnip3l-ps/Herc1/Ppp1r3d/Tigar/Mtmr2/Wac/Mapt/Mylip/Usp30/Ythdf2/Sh3rf2/Tnfaip3/Marchf7/Sesn2/Styx/Ubqln2/Ophn1/Tent5c/Laptm4b/Gpd1/Dapl1/Hnrnpa0/Edem2/Fyco1/Casp1/F8a/Depp1/Prr5l/Zc3h14/Dcp2/Pacsin3/Trdmt1/Trim21/Timp1/Rnft1
GO:0036465	synaptic vesicle recycling	7/1687	31/17970	0.0223594	Cyfip1/Bltp1/Dgkq/Syp/Rab5a/Ophn1/Sh3gl2
GO:0045047	protein targeting to ER	7/1687	31/17970	0.0223594	Hspa5/Edem1/Srp54c/Tram1/Ssr3/Sgtb/Srp54a
GO:1902108	regulation of mitochondrial membrane permeability involved in apoptotic process	7/1687	31/17970	0.0223594	Mtch2/Zfp13/Chchd10/Bnip3l-ps/Eya2/Rhot1/Gm20604
GO:0002027	regulation of heart rate	11/1687	60/17970	0.0225518	Kcnq1/Tac1/Adm/Hrc/Pkp2/Popdc2/Edn2/Kcne3/Ada/Bves/Dsp
GO:0010717	regulation of epithelial to mesenchymal transition	11/1687	60/17970	0.0225518	Ctnnb1/Bmp4/Myocd/Ppp2ca/Pawr/Spry2/Ell3/Grem1/Foxc1/Spred1/Tgfbr1
GO:0034340	response to type I interferon	8/1687	38/17970	0.0226248	Wnt5a/Ifitm2/Ifit1bl2/Shfl/Ythdf2/Dcst1/Mavs/Ifit1bl1
GO:0098900	regulation of action potential	8/1687	38/17970	0.0226248	Kcnb1/Tac1/Rangrf/Pawr/Pkp2/Kcne3/Rapgef4/Dsp
GO:1901617	organic hydroxy compound biosynthetic process	23/1687	158/17970	0.0226805	Pcbd2/Wnt5a/Lpcat3/Impa1/Dkk3/Abca2/Ppip5k1/Fdps/Ddc/Dgkq/Dhcr7/H6pd/Pdxp/Per2/Pcbd1/Amacr/Erlin1/Nus1/Gper1/Hmgcr/Tyr/Alox15/Star
GO:0048660	regulation of smooth muscle cell proliferation	18/1687	116/17970	0.0229059	Smpd3/Egr1/Ctnnb1/Mmp2/Fgf9/Bmp4/Myocd/Hpgd/Cdkn1b/Il18/Nqo2/Rab5a/Cdh13/Tnfaip3/Calcrl/Gper1/Zfp143/Nos3
GO:0060541	respiratory system development	24/1687	167/17970	0.0233069	Smpd3/Wnt5a/Tab1/Ctnnb1/Crispld2/Fgf9/Bmp4/Myocd/Lama1/Spry2/Ep300/Chd7/Pitx2/Elk1/Dhcr7/Sec24b/Stra6/Mgp/Edn2/Abca3/Wdpcp/Dnaaf1/Ada/Nos3
GO:0033044	regulation of chromosome organization	34/1687	255/17970	0.0233113	Phf8/Ctc1/Ctnnb1/Myocd/Mad1l1/Riok2/Birc5/Rnf4/Ep300/Zwint/Wapl/Morc2a/Gm33950/Nos1/Bcl6/Ddx11/Terf1/Mtf2/Cct4/Setd5/Setd7/Tnks/Spdl1/Msx3/Resf1/Chtop/Xrcc3/2700099C18Rik/Dnmt3b/Dcp2/Pif1/Sgo2a/Mecp2/Terf2ip
GO:0000910	cytokinesis	17/1687	108/17970	0.0233726	Poldip2/Myh10/Aurka/Snx18/Cenpa/Birc5/Prc1/Pdxp/Myo19/Spast/Gm2788/Cep55/Cul7/Septin4/Klhl13/Klhl9/Kif20a
GO:0009065	glutamine family amino acid catabolic process	17/1687	108/17970	0.0233726	Prodh/Arg2/Gm46829/Ddah1/Gm31349/Gm36787/Nos1/Gm54336/Gls2/Gm16702/Gm36375/Gm41608/Gm36279/Ddah2/Gm42245/Nos3/Gm41450
GO:2001251	negative regulation of chromosome organization	17/1687	108/17970	0.0233726	Phf8/Ctc1/Mad1l1/Birc5/Zwint/Wapl/Terf1/Mtf2/Tnks/Spdl1/Msx3/Xrcc3/2700099C18Rik/Dnmt3b/Dcp2/Pif1/Terf2ip
GO:0046165	alcohol biosynthetic process	16/1687	100/17970	0.0237384	Pcbd2/Lpcat3/Impa1/Dkk3/Abca2/Ppip5k1/Fdps/Dgkq/Dhcr7/H6pd/Pdxp/Pcbd1/Erlin1/Nus1/Gper1/Hmgcr
GO:0007040	lysosome organization	10/1687	53/17970	0.024026	Gaa/Hps4/Clvs1/Tmem106b/Tmem165/Tmem199/Laptm4b/Atp6ap2/Hook1/Gm32391
GO:0048844	artery morphogenesis	10/1687	53/17970	0.024026	Tbx2/Bmp4/Myocd/Hpgd/Chd7/Sec24b/Stra6/Ptger4/Foxc1/Tgfbr1
GO:0080171	lytic vacuole organization	10/1687	53/17970	0.024026	Gaa/Hps4/Clvs1/Tmem106b/Tmem165/Tmem199/Laptm4b/Atp6ap2/Hook1/Gm32391
GO:0051726	regulation of cell cycle	82/1687	705/17970	0.0242793	Ccnd1/Gdpd5/Fbxo31/Smpd3/Nme6/Wnt5a/Poldip2/Ctc1/Cdc25a/Ctnnb1/Ddx3x/Aurka/Ccni/Bmp4/Cul4a/Myocd/Mad1l1/Inhba/Riok2/Cenpf/Birc5/Rnf4/Bmal1/Hexim2/Dtl/Ccpg1/Prc1/Mn1/Hpgd/Zwint/Cdkn1b/Nr4a1/Wapl/Zfp36l2/Cep295/Cdkn1c/Smoc2/Gm33950/Pdxp/Csnk2a1-ps3/Ticrr/Myo19/Spast/Per2/Ccndbp1/Thap1/Ercc6/Ddx11/Wac/Snora73b/Zfp655/Wfs1/Ythdf2/Gm2788/E2f5/Gm46764/Tnfaip3/Tnks/Prr11/Spdl1/Ccne2/Cul7/Cdkn3/Map3k20/G…
GO:0072001	renal system development	32/1687	238/17970	0.0244019	Wnt5a/Egr1/Itga8/Ctnnb1/Arg2/Lrp4/Bmp4/Myocd/Lamb2/Cenpf/Dcn/Hpgd/Nup160/Cdkn1c/Wnt9b/Ndufs6b/Smad9/Stra6/Sox8/Hnf1b/Wfs1/Wdpcp/Lgr4/Grem1/Pgf/Nfia/Glis2/Foxc1/Tmed10-ps/Tgfbr1/Gpr4/Cep290
GO:0010563	negative regulation of phosphorus metabolic process	45/1687	356/17970	0.0244593	Mtch2/Zc3h12a/Dynlt1c/Mgat5/Dnajc10/Ppia/Ppm1f/Bmp4/Myocd/Abca2/Ppp2ca/Ywhab/Gm46840/Hexim2/Dgkq/Spry2/Cdkn1b/Prkn/Slc27a1/Cdkn1c/Zbed3/Pcp4/Nos1/Mvp/Il18/Tigar/Mapt/Sh3rf2/Tnfaip3/Entpd1/Grem1/F2rl1/Pwp1/Gper1/Sirpa/Prr5l/Spred1/Ppp1r9b/Sh3gl2/Ocln/Dusp6/Dnaja1/Ibtk/Cblb/Terf2ip
GO:0045936	negative regulation of phosphate metabolic process	45/1687	356/17970	0.0244593	Mtch2/Zc3h12a/Dynlt1c/Mgat5/Dnajc10/Ppia/Ppm1f/Bmp4/Myocd/Abca2/Ppp2ca/Ywhab/Gm46840/Hexim2/Dgkq/Spry2/Cdkn1b/Prkn/Slc27a1/Cdkn1c/Zbed3/Pcp4/Nos1/Mvp/Il18/Tigar/Mapt/Sh3rf2/Tnfaip3/Entpd1/Grem1/F2rl1/Pwp1/Gper1/Sirpa/Prr5l/Spred1/Ppp1r9b/Sh3gl2/Ocln/Dusp6/Dnaja1/Ibtk/Cblb/Terf2ip
GO:0006256	UDP catabolic process	2/1687	3/17970	0.0247733	Entpd4/Entpd4b
GO:0006663	platelet activating factor biosynthetic process	2/1687	3/17970	0.0247733	Pla2g5/Pla2g4c
GO:0006701	progesterone biosynthetic process	2/1687	3/17970	0.0247733	Egr1/Dgkq
GO:0007223	Wnt signaling pathway, calcium modulating pathway	2/1687	3/17970	0.0247733	Wnt5a/Ror2
GO:0009140	pyrimidine nucleoside diphosphate catabolic process	2/1687	3/17970	0.0247733	Entpd4/Entpd4b
GO:0009146	purine nucleoside triphosphate catabolic process	2/1687	3/17970	0.0247733	Itpa/Ada
GO:0009193	pyrimidine ribonucleoside diphosphate metabolic process	2/1687	3/17970	0.0247733	Entpd4/Entpd4b
GO:0009195	pyrimidine ribonucleoside diphosphate catabolic process	2/1687	3/17970	0.0247733	Entpd4/Entpd4b
GO:0016576	histone dephosphorylation	2/1687	3/17970	0.0247733	Ppm1f/Eya2
GO:0019344	cysteine biosynthetic process	2/1687	3/17970	0.0247733	Cth/Cbs
GO:0021960	anterior commissure morphogenesis	2/1687	3/17970	0.0247733	Draxin/Fbxo45
GO:0031590	wybutosine metabolic process	2/1687	3/17970	0.0247733	Lcmt2/Tyw1
GO:0031591	wybutosine biosynthetic process	2/1687	3/17970	0.0247733	Lcmt2/Tyw1
GO:0032185	septin cytoskeleton organization	2/1687	3/17970	0.0247733	Lrch3/Wdpcp
GO:0035993	deltoid tuberosity development	2/1687	3/17970	0.0247733	Bmp4/Pitx2
GO:0036100	leukotriene catabolic process	2/1687	3/17970	0.0247733	Cyp4f40/Cyp4f18
GO:0036101	leukotriene B4 catabolic process	2/1687	3/17970	0.0247733	Cyp4f40/Cyp4f18
GO:0036335	intestinal stem cell homeostasis	2/1687	3/17970	0.0247733	Lpcat3/Lgr4
GO:0038098	sequestering of BMP from receptor via BMP binding	2/1687	3/17970	0.0247733	Grem1/Grem2
GO:0042361	menaquinone catabolic process	2/1687	3/17970	0.0247733	Cyp4f40/Cyp4f18
GO:0042377	vitamin K catabolic process	2/1687	3/17970	0.0247733	Cyp4f40/Cyp4f18
GO:0042640	anagen	2/1687	3/17970	0.0247733	Wnt5a/Ctnnb1
GO:0043420	anthranilate metabolic process	2/1687	3/17970	0.0247733	Kmo/Kynu
GO:0043456	regulation of pentose-phosphate shunt	2/1687	3/17970	0.0247733	Pgam1/Tigar
GO:0045852	pH elevation	2/1687	3/17970	0.0247733	Slc26a6/Slc26a3
GO:0045875	negative regulation of sister chromatid cohesion	2/1687	3/17970	0.0247733	Wapl/Tnks
GO:0046048	UDP metabolic process	2/1687	3/17970	0.0247733	Entpd4/Entpd4b
GO:0046712	GDP catabolic process	2/1687	3/17970	0.0247733	Entpd4/Entpd4b
GO:0051454	intracellular pH elevation	2/1687	3/17970	0.0247733	Slc26a6/Slc26a3
GO:0051884	regulation of timing of anagen	2/1687	3/17970	0.0247733	Wnt5a/Ctnnb1
GO:0060157	urinary bladder development	2/1687	3/17970	0.0247733	Wnt5a/Myocd
GO:0060681	branch elongation involved in ureteric bud branching	2/1687	3/17970	0.0247733	Bmp4/Hnf1b
GO:0060686	negative regulation of prostatic bud formation	2/1687	3/17970	0.0247733	Wnt5a/Bmp4
GO:0060931	sinoatrial node cell development	2/1687	3/17970	0.0247733	Popdc2/Bves
GO:0061046	regulation of branching involved in lung morphogenesis	2/1687	3/17970	0.0247733	Ctnnb1/Bmp4
GO:0061047	positive regulation of branching involved in lung morphogenesis	2/1687	3/17970	0.0247733	Ctnnb1/Bmp4
GO:0061218	negative regulation of mesonephros development	2/1687	3/17970	0.0247733	Bmp4/Hnf1b
GO:0070602	regulation of centromeric sister chromatid cohesion	2/1687	3/17970	0.0247733	Ctnnb1/Sgo2a
GO:0071072	negative regulation of phospholipid biosynthetic process	2/1687	3/17970	0.0247733	Abca2/Slc27a1
GO:0071317	cellular response to isoquinoline alkaloid	2/1687	3/17970	0.0247733	Ppp1r9b/Mecp2
GO:0071585	detoxification of cadmium ion	2/1687	3/17970	0.0247733	Slc30a1/1700034H15Rik
GO:0071641	negative regulation of macrophage inflammatory protein 1 alpha production	2/1687	3/17970	0.0247733	Arg2/Sirpa
GO:0071947	protein deubiquitination involved in ubiquitin-dependent protein catabolic process	2/1687	3/17970	0.0247733	Tnfaip3/Otud7a
GO:0072095	regulation of branch elongation involved in ureteric bud branching	2/1687	3/17970	0.0247733	Bmp4/Hnf1b
GO:0072174	metanephric tubule formation	2/1687	3/17970	0.0247733	Wnt9b/Sox8
GO:0072180	mesonephric duct morphogenesis	2/1687	3/17970	0.0247733	Wnt9b/Hnf1b
GO:0072197	ureter morphogenesis	2/1687	3/17970	0.0247733	Bmp4/Sox8
GO:0090258	negative regulation of mitochondrial fission	2/1687	3/17970	0.0247733	Prkn/Mapt
GO:0097053	L-kynurenine catabolic process	2/1687	3/17970	0.0247733	Kynu/Kyat3
GO:1900125	regulation of hyaluronan biosynthetic process	2/1687	3/17970	0.0247733	Smpd3/Ptger4
GO:1900239	regulation of phenotypic switching	2/1687	3/17970	0.0247733	Fgf9/Myocd
GO:1901873	regulation of post-translational protein modification	2/1687	3/17970	0.0247733	Abca2/Crtap
GO:1902338	negative regulation of apoptotic process involved in morphogenesis	2/1687	3/17970	0.0247733	Hnf1b/Foxc1
GO:1903334	positive regulation of protein folding	2/1687	3/17970	0.0247733	Pdia3/Sgtb
GO:1903525	regulation of membrane tubulation	2/1687	3/17970	0.0247733	Atp10a/Sh3gl2
GO:1903850	regulation of cristae formation	2/1687	3/17970	0.0247733	Chchd10/Adck1
GO:1904457	positive regulation of neuronal action potential	2/1687	3/17970	0.0247733	Pawr/Rapgef4
GO:1904746	negative regulation of apoptotic process involved in development	2/1687	3/17970	0.0247733	Hnf1b/Foxc1
GO:1905198	manchette assembly	2/1687	3/17970	0.0247733	Ift56/Hook1
GO:1905603	regulation of maintenance of permeability of blood-brain barrier	2/1687	3/17970	0.0247733	Sh3gl2/Ocln
GO:1990170	stress response to cadmium ion	2/1687	3/17970	0.0247733	Slc30a1/1700034H15Rik
GO:2000474	regulation of opioid receptor signaling pathway	2/1687	3/17970	0.0247733	Syp/Ppp1r9b
GO:2000675	negative regulation of type B pancreatic cell apoptotic process	2/1687	3/17970	0.0247733	Pdx1/Wfs1
GO:2000722	regulation of cardiac vascular smooth muscle cell differentiation	2/1687	3/17970	0.0247733	Myocd/Gper1
GO:0007033	vacuole organization	18/1687	117/17970	0.0247781	Gaa/Atg2b/Hps4/Rab19/Eno1b/Clvs1/Irgm2/Tmem106b/Tmem41b/Tmem165/Ubqln2/Tmem199/Laptm4b/Atp6ap2/Hook1/Gm32391/Trappc8/Synpo2
GO:0030323	respiratory tube development	22/1687	151/17970	0.0251865	Smpd3/Wnt5a/Tab1/Ctnnb1/Crispld2/Fgf9/Bmp4/Myocd/Lama1/Spry2/Ep300/Pitx2/Elk1/Dhcr7/Sec24b/Stra6/Mgp/Edn2/Abca3/Dnaaf1/Ada/Nos3
GO:0090087	regulation of peptide transport	50/1687	403/17970	0.025227	Edem1/Pdx1/Rph3al/Kcnq1/Myh10/Zc3h12a/Wipf1/Ppia/Ppm1f/Bmp4/Kcnb1/Riok2/Exph5/Cd2ap/Ppp2ca/Birc5/Bmal1/Gpr27/Slc26a6/Ep300/Chd7/Pcm1/Prkn/Nos1/Gip/Cpt1a/Per2/Bnip3l-ps/Tmem30b/Gm32340/Mief1/Mavs/Ophn1/Ctdspl2/Ica1/Nucb2/F2rl1/Edem2/Jagn1/Gper1/Ptger4/Rapgef4/Pask/Prr5l/Hspa1l/Tmed10-ps/Hmgn3/Dnaja1/Unc13b/Cep290
GO:0031146	SCF-dependent proteasomal ubiquitin-dependent protein catabolic process	6/1687	25/17970	0.0252812	Fbxo31/Cul4a/Fbxo33/Cul1/Styx/Fbxo38
GO:0035272	exocrine system development	6/1687	25/17970	0.0252812	Pdx1/Lama1/Foxc1/Tfcp2l1/Igsf3/Btbd7
GO:0042149	cellular response to glucose starvation	6/1687	25/17970	0.0252812	Hspa5/Zc3h12a/Kptn/Sesn3/Nuak2/Sesn2
GO:0060323	head morphogenesis	6/1687	25/17970	0.0252812	Mmp2/Crispld2/Ep300/Plekha1/Stra6/Atp6ap2
GO:1905209	positive regulation of cardiocyte differentiation	6/1687	25/17970	0.0252812	Bmp4/Myocd/Fdps/Ep300/Grem1/Gper1
GO:2000826	regulation of heart morphogenesis	6/1687	25/17970	0.0252812	Wnt5a/Ctnnb1/Tbx2/Bmp4/Foxc1/Tgfbr1
GO:0090398	cellular senescence	9/1687	46/17970	0.0253053	Hmga1b/Arg2/Tbx2/Slc30a10/Bmal1/Pawr/Gm33950/Bcl6/Smc6
GO:0030029	actin filament-based process	67/1687	563/17970	0.0253614	Tmsb4x/Parva/Krt19/Gas2l3/Marcks/Kcnq1/Cldn3/Myh10/Cyfip1/Kptn/Wipf1/Tmod3/Arhgef17/Ppm1f/Tac1/Rangrf/Stard8/Cd2ap/Sh3bp1/Eps8/Shroom1/Nuak2/Pawr/Gm15337/Ep300/Washc3/Prkn/Ppp1r9a/Pkp2/Coro2b/Zbed3/Sptbn2/Sipa1l1/Nos1/Gm52861/Pdxp/Myo19/Sh3pxd2b/Arhgap6/Abi1/Bcl6/Sorbs3/Limch1/Snora73b/Capza2/Ophn1/Cdc42bpa/Kcne3/Ehbp1/F2rl1/Akap11/Plekhh2/Sh3kbp1/Ptger4/Sirpa/Avil/Abitram/Ppp1r9b/Wasl/Alox15/Dpy…
GO:0043547	positive regulation of GTPase activity	25/1687	177/17970	0.0253785	Wnt5a/Snx18/Sh3bp1/Ccl8/Dennd1b/Gmip/Ccl20/Ccl9/Gnb5/Sipa1l1/Arhgap42/Arhgap29/Arhgap6/Mmut/Epha2/Gnao1/Arhgap11a/Ccl22/Prtn3/Tbc1d30/F2rl1/Dock11/Gm40855/Tbc1d2/Rgl3
GO:0009725	response to hormone	76/1687	649/17970	0.0254851	Ccnd1/Ywhah/Slc2a4/Pdx1/Nasp/Egr1/Kcnq1/Ctnnb1/Mmp2/Cyfip1/Sord/Bmp4/Sesn3/Abca2/Inhba/Tac1/Slc30a10/Adm/Ppp2ca/Rnf4/Bmal1/Slc26a6/Igfbp2/Ep300/Reg3a/Hpgd/Pitx2/Cdkn1b/Elk1/Trim72/Nr4a1/Slc27a1/Fads1/Zfp36l2/Meak7/Zbed3/Ptger2/Nos1/Csnk2a1-ps3/Wfdc1/Gip/Scnn1a/Il18/Gm32340/Gm46878/Ly6g2/Reg1/Abca3/Postn/Eif2b3/Sesn2/Slc25a33/Nucb2/Lcat/Serpina3g/Gper1/Lbh/Bche/Ptger4/Abcg2/Fut7/Sort1/Egr2/Glb1/Dn…
GO:0001578	microtubule bundle formation	16/1687	101/17970	0.025835	Katna1/Prc1/Jhy/Ift56/Spast/Togaram1/Gm47324/Dnaaf2/Gas8/Dnaaf1/Cfap157/Armc2/Zmynd10/Mapre1/Mns1/Kif20a
GO:0001932	regulation of protein phosphorylation	112/1687	999/17970	0.0260817	Ccnd1/Smpd3/Wnt5a/Tab1/Egr1/Cldn3/Ctnnb1/Ddx3x/Dab1/Lrp4/Zc3h12a/Dynlt1c/Dnajc10/Ppia/Ppm1f/Ccni/Ccnq/Ltf/Fgf9/Bmp4/Myocd/Ccn1/Inhba/Slc30a10/Bnip2/Pik3cg/Ppp2ca/Ror2/Map3k21/Avpi1/Gpr55/Bmp3/Hexim2/Dgkq/Unc5cl/Traf3/Map3k7/Ccl8/Hrc/Mid1/Spry2/Ep300/Fgfr3/Cdkn1b/Prkn/Slc27a1/Adrb3/Ppp1r9a/Nbr1/Ccl20/Mturn/Ccl9/Cdkn1c/Prlr/Zbed3/Pcp4/Nos1/Wnt9b/Il22ra2/Irgm2/Mvp/Ercc6/Il18/Map3k13/Limch1/Pik3r5/Nq…
GO:0008643	carbohydrate transport	15/1687	93/17970	0.0261871	Smpd3/Slc2a2/Slc2a8/Slc26a6/Slc27a1/Slc5a4b/Gip/Slc37a3/Sesn2/Slc23a2/Slc35a2/Sort1/Ocln/Slc35a1/Mfsd4b3-ps
GO:0006221	pyrimidine nucleotide biosynthetic process	8/1687	39/17970	0.0261948	Agpat4/Uck2/Nme6/Gm5867/Nme7/Lclat1/Dhodh/Agpat5
GO:0043388	positive regulation of DNA binding	8/1687	39/17970	0.0261948	Pdx1/Ctnnb1/Myocd/Ep300/Pitx2/Prkn/Wapl/Foxc1
GO:0045912	negative regulation of carbohydrate metabolic process	8/1687	39/17970	0.0261948	Mtch2/Smpd3/Gm46840/Ep300/Prkn/Fam3a/Tigar/Pask
GO:0000723	telomere maintenance	14/1687	85/17970	0.0263682	Ctc1/Ctnnb1/Zbtb48/Gm33950/Smc6/Terf1/Cct4/Tnks/Ccne2/Atm/Xrcc3/Dcp2/Pif1/Terf2ip
GO:0022037	metencephalon development	14/1687	85/17970	0.0263682	Hspa5/Dab1/Gnpat/Pdss2/Sptbn2/Uqcrq/Sec24b/Herc1/Faim2/Ophn1/Ttbk2/Foxc1/Cntn1/Mecp2
GO:0034404	nucleobase-containing small molecule biosynthetic process	14/1687	85/17970	0.0263682	Nme6/Acot7/Entpd4/Nudt7/Entpd4b/Itpa/Pde8b/Nt5e/Nme7/Entpd1/Ada/Smpdl3a/Enpp5/Gm52783
GO:0042743	hydrogen peroxide metabolic process	7/1687	32/17970	0.0263704	Duox2/Zfp13/Duoxa2/Noxa1/COX2/Cat/Ptger4
GO:0055025	positive regulation of cardiac muscle tissue development	7/1687	32/17970	0.0263704	Tbx2/Fgf9/Bmp4/Myocd/Fdps/Ep300/Grem1
GO:0048666	neuron development	88/1687	766/17970	0.0266301	Ywhah/Gdpd5/Fbxo31/Hspa5/Wnt5a/Kcnq1/Katna1/Ctnnb1/Dab1/Lrp4/Mmp2/Cyfip1/Aurka/Dynlt1c/Rims2/Bmp4/Tbc1d24/Lamb2/Adm/Arf4/Raph1/Lama1/Ror2/Nrp2/Ep300/Bloc1s6/Prkn/Npy/Sema6c/Ppp1r9a/Mturn/Cdkn1c/Prmt3/Sema4f/Pcp4/Sipa1l1/Amigo1/Cpne9/Ephb3/Fstl4/Uqcrq/Ift56/Spast/Aatk/Draxin/Tmem106b/Sec24b/Ercc6/Herc1/Map3k13/Mtmr2/Mapt/Mylip/Reg1/Epha2/Gnao1/Gm46764/Wdpcp/Postn/Lgr4/Pak6/Wdr36/Ophn1/Ss18l1/Cul7/…
GO:0008610	lipid biosynthetic process	57/1687	470/17970	0.0267606	Elovl6/Agpat4/Smpd3/Hacd2/Acot7/Pgap3/Egr1/Mecr/Lpcat3/Pgap2/Pigv/Dkk3/Degs1/Ccn1/Abca2/Gnpat/Pdss2/Fdps/Aldh1a1/Pik3cg/Mboat2/Dolk/Dgkq/Pyurf/Slc27a1/Dhcr7/Fads1/Pigg/Pigl/Prmt3/H6pd/Pde8b/Gip/Fam3a/Pla2g5/Cers6/Elovl5/Pld1/Amacr/Erlin1/Edn2/Nus1/Abca3/Lcat/Hacd1/Gper1/Mogat2/Lpin1/Hmgcr/Avil/Lclat1/B4galnt1/Alox15/Cnep1r1/Pla2g4c/Star/Agpat5
GO:0046488	phosphatidylinositol metabolic process	18/1687	118/17970	0.0267639	Inpp5j/Pgap3/Hycc2/Impa1/Pgap2/Pigv/Pik3cg/Pyurf/Slc27a1/Pigg/Pigl/Mtmr7/Mtmr2/Pip4p2/Lclat1/Sacm1l/Pik3r6/Fig4
GO:0046890	regulation of lipid biosynthetic process	22/1687	152/17970	0.0269311	Smpd3/Egr1/Lpcat3/Dkk3/Ccn1/Abca2/Fdps/Dgkq/Slc27a1/Dhcr7/Prmt3/H6pd/Pde8b/Gip/Fam3a/Elovl5/Erlin1/Abca3/Gper1/Avil/Cnep1r1/Star
GO:0008625	extrinsic apoptotic signaling pathway via death domain receptors	10/1687	54/17970	0.0270893	Rnf34/Ddx3x/Casp8/Il18/Faim2/Tnfaip3/Gm20604/Casp8ap2/Tnfrsf10b/Sort1
GO:0060411	cardiac septum morphogenesis	10/1687	54/17970	0.0270893	Parva/Wnt5a/Tbx2/Bmp4/Ccn1/Nrp2/Chd7/Pitx2/Tgfbr1/Nos3
GO:0051301	cell division	55/1687	452/17970	0.0275558	Fgf1/Poldip2/Myh10/Cdc25a/Katna1/Aurka/Dynlt1c/Lmln/Fgf9/Snx18/Cenpa/Cdca2/Cd2ap/Birc5/Haus2/Prc1/Zwint/Wapl/Zfp36l2/Anapc16/Chmp1b/Gm33950/Wnt9b/Pdxp/Ppp1cb/Myo19/Gm37804/Sapcd2/Spast/Terf1/Ythdf2/Gm2788/Cep55/Tnks/Spdl1/Ccne2/Klhl42/Syce3/Cul7/Pgf/Mapre1/Spc25/Lbh/Septin4/2700099C18Rik/Syce2/Klhl13/Klhl9/Tgfa/Spice1/Rbl2/Sgo2a/Zfp449/Cdk20/Kif20a
GO:0009164	nucleoside catabolic process	5/1687	19/17970	0.0275788	Nudt1/Entpd4/Entpd4b/Upb1/Ada
GO:0009208	pyrimidine ribonucleoside triphosphate metabolic process	5/1687	19/17970	0.0275788	Uck2/Nme6/Entpd4/Entpd4b/Nme7
GO:0010460	positive regulation of heart rate	5/1687	19/17970	0.0275788	Kcnq1/Adm/Hrc/Edn2/Ada
GO:0033688	regulation of osteoblast proliferation	5/1687	19/17970	0.0275788	Ltf/Ccn1/Mn1/Sox8/Grem1
GO:0043094	cellular metabolic compound salvage	5/1687	19/17970	0.0275788	Uck2/Ampd2/Enoph1/Ampd3/Ada
GO:0045736	negative regulation of cyclin-dependent protein serine/threonine kinase activity	5/1687	19/17970	0.0275788	Myocd/Hexim2/Cdkn1b/Cdkn1c/Tnfaip3
GO:0045943	positive regulation of transcription by RNA polymerase I	5/1687	19/17970	0.0275788	Phf8/Wdr75/Ddx11/Pwp1/Utp15
GO:0046036	CTP metabolic process	5/1687	19/17970	0.0275788	Uck2/Nme6/Entpd4/Entpd4b/Nme7
GO:0046885	regulation of hormone biosynthetic process	5/1687	19/17970	0.0275788	Egr1/Dkk3/Dgkq/H6pd/Pde8b
GO:1902751	positive regulation of cell cycle G2/M phase transition	5/1687	19/17970	0.0275788	Ccnd1/Cdc25a/Dtl/Atad5/Mecp2
GO:1904030	negative regulation of cyclin-dependent protein kinase activity	5/1687	19/17970	0.0275788	Myocd/Hexim2/Cdkn1b/Cdkn1c/Tnfaip3
GO:0045930	negative regulation of mitotic cell cycle	23/1687	161/17970	0.0276137	Ccnd1/Fbxo31/Nme6/Ctnnb1/Bmp4/Mad1l1/Birc5/Dtl/Zwint/Cdkn1b/Zfp36l2/Cdkn1c/Ticrr/Wac/Zfp655/Tnks/Spdl1/Map3k20/Usp47/Foxc1/Xrcc3/2700099C18Rik/Rbl2
GO:0060828	regulation of canonical Wnt signaling pathway	23/1687	161/17970	0.0276137	Wnt5a/Frat1/Egr1/Ddx3x/Lrp4/Fgf9/Dkk3/Nrarp/Ror2/Dkk2/Bmal1/Adgra2/Prkn/Zbed3/Tmem198b/Draxin/Tnks/Lgr4/Grem1/Rnf146/Atp6ap2/Usp47/Rspo1
GO:0001956	positive regulation of neurotransmitter secretion	4/1687	13/17970	0.0277385	Kmo/Gper1/Ptger4/Unc13b
GO:0003148	outflow tract septum morphogenesis	4/1687	13/17970	0.0277385	Parva/Tbx2/Bmp4/Nrp2
GO:0019320	hexose catabolic process	4/1687	13/17970	0.0277385	Eno1b/Il11ra2/Tigar/Glb1
GO:0045906	negative regulation of vasoconstriction	4/1687	13/17970	0.0277385	Mmp2/Adm/Arhgap42/Nos1
GO:0048532	anatomical structure arrangement	4/1687	13/17970	0.0277385	Hspa5/Dab1/Nrp2/Egr2
GO:0050665	hydrogen peroxide biosynthetic process	4/1687	13/17970	0.0277385	Duox2/Zfp13/Duoxa2/COX2
GO:0070243	regulation of thymocyte apoptotic process	4/1687	13/17970	0.0277385	Wnt5a/Bmp4/Casp8/Ada
GO:0071577	zinc ion transmembrane transport	4/1687	13/17970	0.0277385	Slc30a10/Slc30a1/Slc39a3/1700034H15Rik
GO:0086005	ventricular cardiac muscle cell action potential	4/1687	13/17970	0.0277385	Kcnq1/Pkp2/Kcne3/Dsp
GO:0097320	plasma membrane tubulation	4/1687	13/17970	0.0277385	Cavin2/Atp10a/Sh3gl2/Pacsin3
GO:2000738	positive regulation of stem cell differentiation	4/1687	13/17970	0.0277385	Bmp4/Tcf15/Pwp1/Foxc1
GO:0048754	branching morphogenesis of an epithelial tube	16/1687	102/17970	0.0280671	Wnt5a/Ctnnb1/Bmp4/Fkbpl/Nrarp/Lama1/Spry2/Pitx2/Wnt9b/Sox8/Hnf1b/Mgp/Epha2/Lgr4/Grem1/Pgf
GO:1903409	reactive oxygen species biosynthetic process	16/1687	102/17970	0.0280671	Smpd3/Duox2/Arg2/Zc3h12a/Slc30a10/Zfp13/Duoxa2/Slc5a3/Ddah1/Prkn/COX2/Nos1/Slc25a33/Ddah2/Sirpa/Nos3
GO:1901888	regulation of cell junction assembly	11/1687	62/17970	0.0281908	Poldip2/Cldn3/Ppm1f/Pkp2/Arhgap6/Limch1/Epha2/Wdpcp/Grem1/Col16a1/Prkch
GO:0032386	regulation of intracellular transport	31/1687	232/17970	0.0284875	Edem1/Zc3h12a/Wipf1/Reep2/Bmp4/Kcnb1/Abca2/Riok2/Ppp2ca/Dnajc30/Hrc/Ep300/Pcm1/Sec24b/Bnip3l-ps/Tmem30b/Gm32340/Mtmr2/Mapt/Nus1/Mief1/Mavs/Rhot1/Ctdspl2/Edem2/Gper1/Prr5l/Hspa1l/Bves/Cep290/Mecp2
GO:0048732	gland development	42/1687	332/17970	0.0285867	Pdx1/Wnt5a/Ctc1/Ctnnb1/Mmp2/Aurka/Tbx2/Bmp4/Lama1/Hoxb3/Pitx2/Cdkn1b/Elk1/Elf3/Cdkn1c/Prlr/COX2/Ephb3/Csnk2a1-ps3/Cpt1a/Arhgap5/Il18/Stra6/Hnf1b/Upb1/Reg1/Epha2/Gm2788/Tnfaip3/Dnaaf1/Ada/Atp7b/Lbh/Foxc1/Otc/Tfcp2l1/Proc/Igsf3/Tgfbr1/Tgfa/Atp2c2/Btbd7
GO:0048661	positive regulation of smooth muscle cell proliferation	12/1687	70/17970	0.0287758	Smpd3/Egr1/Mmp2/Fgf9/Bmp4/Hpgd/Il18/Nqo2/Rab5a/Cdh13/Calcrl/Zfp143
GO:0010833	telomere maintenance via telomere lengthening	9/1687	47/17970	0.0287792	Ctc1/Ctnnb1/Zbtb48/Terf1/Cct4/Tnks/Dcp2/Pif1/Terf2ip
GO:0035924	cellular response to vascular endothelial growth factor stimulus	9/1687	47/17970	0.0287792	Dcn/Adgra2/Spry2/Nr4a1/Smoc2/Nus1/Pgf/Foxc1/Egr3
GO:0006637	acyl-CoA metabolic process	13/1687	78/17970	0.0289709	Elovl6/Acot7/Pdhx/Mpc1/Acadsb/Nudt7/4833422C13Rik/Ehhadh/Elovl5/Acot4/Kynu/Acot9/Acot2
GO:0035383	thioester metabolic process	13/1687	78/17970	0.0289709	Elovl6/Acot7/Pdhx/Mpc1/Acadsb/Nudt7/4833422C13Rik/Ehhadh/Elovl5/Acot4/Kynu/Acot9/Acot2
GO:0016236	macroautophagy	20/1687	136/17970	0.0290367	Poldip2/Atg2b/Sesn3/Rab19/Dcn/Map3k7/Prkn/Nbr1/Irgm2/Bnip3l-ps/Tigar/Gm32340/Wac/Tmem41b/Usp30/Sesn2/Ubqln2/Fyco1/Trappc8/Synpo2
GO:0007548	sex differentiation	31/1687	233/17970	0.0300112	Nudt1/Hspa5/Wnt5a/Nasp/Ctnnb1/Mmp2/Fgf9/Bmp4/Inhba/Ror2/Patz1/Tyro3/Adgrg1/Rec8/Chd7/Pitx2/Plekha1/Arid4a/Wnt9b/Cbx2/Smad9/Stra6/Sox8/Hnf1b/Edn2/Lgr4/Ptger4/Foxc1/Tgfbr1/Nos3/Star
GO:0097237	cellular response to toxic substance	19/1687	128/17970	0.0300773	Smpd3/Egr1/Zc3h12a/Rdh12/Aldh1a1/Ppp2ca/Pawr/Plekha1/Prkn/Ppp1r9a/Ddx11/Tnfaip3/Sesn2/Rnf146/Slc23a2/Sirpa/Oser1/Ankzf1/Nos3
GO:0098781	ncRNA transcription	8/1687	40/17970	0.0301384	Ell2/Uspl1/Ell3/Ddx11/Snapc4/Cc2d1a/Pwp1/Zfp143
GO:0045597	positive regulation of cell differentiation	83/1687	722/17970	0.030183	Tmsb4x/Gdpd5/Fbxo31/Hspa5/Wnt5a/Ctnnb1/Dab1/Cyfip1/Zc3h12a/Nkx6-2/Aurka/Dynlt1c/Rims2/Ltf/Bmp4/Myocd/Ccn1/Inhba/Bnip2/Fdps/Adm/Ror2/Atoh8/Bmal1/Casp8/Cth/Ccl8/Vnn1/Ep300/Bloc1s6/Tcf15/Rin2/Prkn/Ppp1r9a/Mturn/Pcp4/Ell3/Amigo1/Cpne9/Sh3pxd2b/Bcl6/Tmem106b/Il18/Smad9/Map3k13/Sox8/Cd53/Mapt/Reg1/Cd27/Dock1/Gm31597/Ss18l1/Cul7/Grem1/Nptn/Slc23a2/Ada/Akap11/Cd83/Adnp/Pwp1/Gper1/Ptger4/Foxc1/Egr2/Prkch/…
GO:0003338	metanephros morphogenesis	6/1687	26/17970	0.0303324	Ctnnb1/Bmp4/Wnt9b/Sox8/Lgr4/Grem1
GO:0032881	regulation of polysaccharide metabolic process	6/1687	26/17970	0.0303324	Smpd3/Ppp1cb/Ppp1r3d/Ptger4/Pask/Epm2aip1
GO:0035025	positive regulation of Rho protein signal transduction	6/1687	26/17970	0.0303324	Gpr55/Gpr20/Adgrg1/F2rl2/F2rl1/Gpr4
GO:0035850	epithelial cell differentiation involved in kidney development	6/1687	26/17970	0.0303324	Ctnnb1/Bmp4/Lamb2/Wnt9b/Grem1/Gpr4
GO:0035886	vascular smooth muscle cell differentiation	6/1687	26/17970	0.0303324	Fgf9/Myocd/Adm/Cth/Pitx2/Gper1
GO:0048278	vesicle docking	6/1687	26/17970	0.0303324	Stx6/Rims2/Kcnb1/Bloc1s6/Bves/Unc13b
GO:0051489	regulation of filopodium assembly	6/1687	26/17970	0.0303324	Ppp1r9a/Rab5a/Abitram/Dock11/Dpysl2/Tgfbr1
GO:0061462	protein localization to lysosome	6/1687	26/17970	0.0303324	Kptn/Meak7/Lmbrd1/Zfyve16/Sort1/Glmp
GO:0120178	steroid hormone biosynthetic process	6/1687	26/17970	0.0303324	Egr1/Dkk3/Dgkq/Dhcr7/H6pd/Star
GO:1902110	positive regulation of mitochondrial membrane permeability involved in apoptotic process	6/1687	26/17970	0.0303324	Zfp13/Chchd10/Bnip3l-ps/Eya2/Rhot1/Gm20604
GO:0032259	methylation	38/1687	297/17970	0.0308319	Phf8/Nop2/Cmtr1/Ctnnb1/Zcchc4/Mrm2/Tyw3/Mettl14/Fam98b/Smyd2/Lcmt2/Thumpd2/Prdm10/Arid4a/Prmt3/Mettl8/Trmt12/Mtr/Mtf2/Setd5/Mettl23/Setd7/Kdm3a/Wtap/Mettl21a/Tfb1m/Gm36279/Chtop/Pwp1/Dydc2/Dnmt3b/Nsun4/Bcdin3d/Trmt6/Eef1akmt1/Trdmt1/Mecp2/Wdr5b
GO:0006278	RNA-dependent DNA biosynthetic process	7/1687	33/17970	0.0308446	Ctc1/Ctnnb1/Terf1/Cct4/Tnks/Dcp2/Pif1
GO:0007004	telomere maintenance via telomerase	7/1687	33/17970	0.0308446	Ctc1/Ctnnb1/Terf1/Cct4/Tnks/Dcp2/Pif1
GO:0010171	body morphogenesis	7/1687	33/17970	0.0308446	Mmp2/Crispld2/Ep300/Plekha1/Stra6/Atp6ap2/Grem2
GO:0021575	hindbrain morphogenesis	7/1687	33/17970	0.0308446	Hspa5/Dab1/Gnpat/Sptbn2/Herc1/Faim2/Ophn1
GO:0033866	nucleoside bisphosphate biosynthetic process	7/1687	33/17970	0.0308446	Elovl6/Acot7/Pdhx/Mpc1/Pank1/Pank4/Elovl5
GO:0034030	ribonucleoside bisphosphate biosynthetic process	7/1687	33/17970	0.0308446	Elovl6/Acot7/Pdhx/Mpc1/Pank1/Pank4/Elovl5
GO:0034033	purine nucleoside bisphosphate biosynthetic process	7/1687	33/17970	0.0308446	Elovl6/Acot7/Pdhx/Mpc1/Pank1/Pank4/Elovl5
GO:0038084	vascular endothelial growth factor signaling pathway	7/1687	33/17970	0.0308446	Dcn/Adgra2/Spry2/Smoc2/Nus1/Pgf/Foxc1
GO:0043470	regulation of carbohydrate catabolic process	7/1687	33/17970	0.0308446	Mtch2/Pgam1/Ep300/Ppp1cb/Ppp1r3d/Tigar/Gpd1
GO:0072599	establishment of protein localization to endoplasmic reticulum	7/1687	33/17970	0.0308446	Hspa5/Edem1/Srp54c/Tram1/Ssr3/Sgtb/Srp54a
GO:1901799	negative regulation of proteasomal protein catabolic process	7/1687	33/17970	0.0308446	Caml/Uchl5/Wac/Marchf7/Styx/Ophn1/F8a
GO:1904356	regulation of telomere maintenance via telomere lengthening	7/1687	33/17970	0.0308446	Ctc1/Ctnnb1/Terf1/Cct4/Tnks/Dcp2/Pif1
GO:0032446	protein modification by small protein conjugation	67/1687	569/17970	0.0309247	Rnf213/Fbxo31/Hspa5/Ctu1/Leo1/Egr1/Katna1/Rnf34/Ctnnb1/Ddx3x/Ubr3/Mkrn2/Ppia/Uba2/Cul4a/Dda1/Rnf4/Traf3/Dtl/Tulp4/Spry2/Caml/Trim72/Prkn/Anapc16/Prmt3/Peli1/Klhl7/Fbxo33/Per2/Dcaf6/Dtx4/Btbd1/Pcnp/Arrdc4/Dtx3/Gm32340/Cul1/Wac/Shprh/Wfs1/Mylip/Sh3rf2/Tnfaip3/Tnks/Marchf7/Klhl42/Cul7/Rnf146/Klhl8/Med18/Rnf135/Gm39210/Septin4/Fbxo45/Egr2/Dcun1d4/Rnf103/Neurl2/Klhl13/Klhl9/Tgfbr1/Dnaja1/Fbxo32/Trim21…
GO:0045666	positive regulation of neuron differentiation	35/1687	270/17970	0.0313495	Gdpd5/Fbxo31/Hspa5/Wnt5a/Dab1/Cyfip1/Dynlt1c/Rims2/Bmp4/Bnip2/Ror2/Ep300/Prkn/Ppp1r9a/Pcp4/Amigo1/Cpne9/Bcl6/Tmem106b/Map3k13/Mapt/Reg1/Ss18l1/Cul7/Nptn/Slc23a2/Adnp/Avil/Cntn1/Dnmt3b/Megf8/Zfyve27/Cbfa2t2/Mecp2/Zeb1
GO:0046785	microtubule polymerization	11/1687	63/17970	0.0313609	Slain2/Tubgcp4/Rangrf/Cdkn1b/Tubgcp2/Togaram1/Pde4dip/Mapt/Mzt1/Mapre1/Mecp2
GO:0030198	extracellular matrix organization	29/1687	216/17970	0.0314588	Smpd3/Itga8/Mmp2/Crispld2/Lamb2/Ccn1/Dpt/Noxo1/Pomt1/Tcf15/Ecm2/Spock2/Elf3/Col15a1/Smoc2/Sh3pxd2b/Lamb3/Crtap/Ccdc80/Postn/Col8a1/Grem1/Col16a1/Foxc1/Col8a2/Tgfbr1/Thsd4/Kazald1/Adamts19
GO:0002040	sprouting angiogenesis	14/1687	87/17970	0.0315457	Parva/Rnf213/Bmp4/Nrarp/Adgra2/Nr4a1/Epha2/Gm2788/Cdh13/Grem1/Pgf/Spred1/Tbxa2r/Egr3
GO:0032200	telomere organization	14/1687	87/17970	0.0315457	Ctc1/Ctnnb1/Zbtb48/Gm33950/Smc6/Terf1/Cct4/Tnks/Ccne2/Atm/Xrcc3/Dcp2/Pif1/Terf2ip
GO:0007006	mitochondrial membrane organization	12/1687	71/17970	0.031778	Mtch2/Mtfp1/Zfp13/Timm9/Chchd10/Samm50/Adck1/Bnip3l-ps/Eya2/Rhot1/Gm20604/Immt
GO:0006165	nucleoside diphosphate phosphorylation	13/1687	79/17970	0.0318063	Mtch2/Pgam1/Hk1/Gm29667/Eno1b/Ep300/Tigar/Eno4/Adpgk/Hkdc1/Gpd1/Gapdh/Gm12070
GO:1901655	cellular response to ketone	13/1687	79/17970	0.0318063	Bmp4/Ndor1/Rnf4/Elk1/Dcps/Ptger2/Scnn1a/Ptger4/Adcy1/Abcg2/Dnmt3b/Star/Trerf1
GO:2000379	positive regulation of reactive oxygen species metabolic process	13/1687	79/17970	0.0318063	Smpd3/Zc3h12a/Cd177/Zfp13/Duoxa2/Slc5a3/Ddah1/COX2/Il18/Mapt/Nqo2/F2rl1/Ddah2
GO:0009636	response to toxic substance	43/1687	344/17970	0.0321575	Kdm3b/Smpd3/Pdx1/Egr1/Kcnq1/Cldn3/Mmp2/Zc3h12a/Rdh12/Slc30a10/Aldh1a1/Ppp2ca/Casp8/Pawr/Hpgd/Slc30a1/Plekha1/Nr4a1/Prkn/Wapl/Ppp1r9a/Cpt1a/Ercc6/Ddx11/1700034H15Rik/Gnao1/Setd7/Cd27/Tnfaip3/Sesn2/Rnf146/Slc23a2/Ada/Abcg2/Sirpa/Oser1/Dnmt3b/Ppp1r9b/Ankzf1/Trdmt1/Tbxa2r/Nos3/Star
GO:0002315	marginal zone B cell differentiation	3/1687	8/17970	0.0322538	Cdh17/Tnfaip3/Dock11
GO:0006000	fructose metabolic process	3/1687	8/17970	0.0322538	Sord/Pfkfb2/Pfkfb3
GO:0006517	protein deglycosylation	3/1687	8/17970	0.0322538	Edem1/Edem2/Engase
GO:0019732	antifungal humoral response	3/1687	8/17970	0.0322538	Ltf/Tac1/Npy
GO:0031053	primary miRNA processing	3/1687	8/17970	0.0322538	Mrpl44/Pus10/Mecp2
GO:0032908	regulation of transforming growth factor beta1 production	3/1687	8/17970	0.0322538	Cd2ap/Laptm4b/Atp6ap2
GO:0034454	microtubule anchoring at centrosome	3/1687	8/17970	0.0322538	Pcm1/Ninl/Cep19
GO:0042373	vitamin K metabolic process	3/1687	8/17970	0.0322538	Cyp4f40/Vkorc1/Cyp4f18
GO:0043101	purine-containing compound salvage	3/1687	8/17970	0.0322538	Ampd2/Ampd3/Ada
GO:0048263	determination of dorsal identity	3/1687	8/17970	0.0322538	Ctnnb1/Grem1/Grem2
GO:0072173	metanephric tubule morphogenesis	3/1687	8/17970	0.0322538	Wnt9b/Sox8/Lgr4
GO:0086069	bundle of His cell to Purkinje myocyte communication	3/1687	8/17970	0.0322538	Rangrf/Pkp2/Dsp
GO:0098911	regulation of ventricular cardiac muscle cell action potential	3/1687	8/17970	0.0322538	Pkp2/Kcne3/Dsp
GO:1900543	negative regulation of purine nucleotide metabolic process	3/1687	8/17970	0.0322538	Mtch2/Tigar/Entpd1
GO:1900747	negative regulation of vascular endothelial growth factor signaling pathway	3/1687	8/17970	0.0322538	Dcn/Adgra2/Spry2
GO:1902036	regulation of hematopoietic stem cell differentiation	3/1687	8/17970	0.0322538	Tcf15/Ythdf2/Foxc1
GO:1902165	regulation of intrinsic apoptotic signaling pathway in response to DNA damage by p53 class mediator	3/1687	8/17970	0.0322538	Ell3/Marchf7/Atad5
GO:1902166	negative regulation of intrinsic apoptotic signaling pathway in response to DNA damage by p53 class mediator	3/1687	8/17970	0.0322538	Ell3/Marchf7/Atad5
GO:2000644	regulation of receptor catabolic process	3/1687	8/17970	0.0322538	Abca2/Mtmr2/Mylip
GO:0044770	cell cycle phase transition	37/1687	289/17970	0.0324832	Ccnd1/Fbxo31/Phf8/Ctc1/Cdc25a/Ddx3x/Ccni/Cul4a/Mad1l1/Inhba/Riok2/Cenpf/Birc5/Dtl/Nes/Mn1/Zwint/Cdkn1b/Zfp36l2/Cdkn1c/Klf11/Gm33950/Ticrr/Spast/Wac/Zfp655/E2f5/Spdl1/Ccne2/Tcf19/Usp47/Xrcc3/2700099C18Rik/Atad5/Kat14/Rbl2/Mecp2
GO:0003151	outflow tract morphogenesis	9/1687	48/17970	0.0325737	Parva/Wnt5a/Ctnnb1/Tbx2/Bmp4/Nrp2/Pitx2/Sec24b/Foxc1
GO:0045071	negative regulation of viral genome replication	9/1687	48/17970	0.0325737	Ifitm2/Zc3h12a/Ltf/Shfl/Prkn/Morc2a/Isg20/Mavs/Resf1
GO:0045839	negative regulation of mitotic nuclear division	9/1687	48/17970	0.0325737	Nme6/Bmp4/Mad1l1/Birc5/Zwint/Tnks/Spdl1/Xrcc3/2700099C18Rik
GO:0045844	positive regulation of striated muscle tissue development	9/1687	48/17970	0.0325737	Ctnnb1/Tbx2/Fgf9/Bmp4/Myocd/Fdps/Bmal1/Ep300/Grem1
GO:0048636	positive regulation of muscle organ development	9/1687	48/17970	0.0325737	Ctnnb1/Tbx2/Fgf9/Bmp4/Myocd/Fdps/Bmal1/Ep300/Grem1
GO:1901863	positive regulation of muscle tissue development	9/1687	48/17970	0.0325737	Ctnnb1/Tbx2/Fgf9/Bmp4/Myocd/Fdps/Bmal1/Ep300/Grem1
GO:0050808	synapse organization	36/1687	280/17970	0.0326883	Wnt5a/Myh10/Ctnnb1/Lrp4/Cyfip1/Igsf9b/Lamb2/Gnpat/Arf4/Chchd10/Nrp2/Ppp1r9a/Prmt3/Sptbn2/Sipa1l1/Amigo1/Ephb3/Lrfn4/Vstm5/Lrrc4b/Setd5/Mtmr2/Mapt/Ophn1/Nptn/Adam10/Nfia/Adnp/Rapgef4/Srcin1/Fbxo45/Abhd17b/Slitrk4/Unc13b/Gphn/Mecp2
GO:0007224	smoothened signaling pathway	16/1687	104/17970	0.032956	Pdx1/Fgf9/Ror2/Txndc15/Gorab/Ift56/Uchl5/Gas8/Ptpdc1/Wdpcp/Tedc1/Ttbk2/Glis2/2700049A03Rik/Megf8/Cdk20
GO:0110053	regulation of actin filament organization	28/1687	208/17970	0.0330554	Tmsb4x/Cyfip1/Tmod3/Ppm1f/Tac1/Sh3bp1/Eps8/Prkn/Ppp1r9a/Sptbn2/Gm52861/Pdxp/Sh3pxd2b/Arhgap6/Limch1/Capza2/F2rl1/Plekhh2/Ptger4/Avil/Abitram/Wasl/Alox15/Gm40363/Gm53330/Tgfbr1/Synpo2/Actr3
GO:0051223	regulation of protein transport	46/1687	373/17970	0.033658	Edem1/Pdx1/Rph3al/Kcnq1/Myh10/Zc3h12a/Wipf1/Ppia/Ppm1f/Bmp4/Kcnb1/Riok2/Exph5/Cd2ap/Ppp2ca/Birc5/Bmal1/Gpr27/Ep300/Pcm1/Prkn/Nos1/Gip/Cpt1a/Per2/Bnip3l-ps/Tmem30b/Gm32340/Mief1/Mavs/Ophn1/Ctdspl2/Ica1/F2rl1/Edem2/Jagn1/Gper1/Ptger4/Rapgef4/Prr5l/Hspa1l/Tmed10-ps/Hmgn3/Dnaja1/Unc13b/Cep290
GO:0000041	transition metal ion transport	15/1687	96/17970	0.033749	Ltf/Slc30a10/Slc30a7/Heph/Slc30a1/Slc39a3/Nos1/Tcn2/1700034H15Rik/Tmem165/Slc31a2/Atp7b/Mmgt2/Scara5/Atp2c2
GO:0003206	cardiac chamber morphogenesis	15/1687	96/17970	0.033749	Parva/Wnt5a/Tbx2/Fgf9/Bmp4/Ccn1/Nrp2/Chd7/Pitx2/Pkp2/Foxc1/Tgfbr1/Dsp/Nos3/Tnni1
GO:0009190	cyclic nucleotide biosynthetic process	5/1687	20/17970	0.0340091	Adcy6/Gucy1a1/Adcy4/Adcy1/Gucy1b1
GO:0033687	osteoblast proliferation	5/1687	20/17970	0.0340091	Ltf/Ccn1/Mn1/Sox8/Grem1
GO:0061162	establishment of monopolar cell polarity	5/1687	20/17970	0.0340091	Wnt5a/Sh3bp1/Lama1/Tcf15/Ophn1
GO:0097106	postsynaptic density organization	5/1687	20/17970	0.0340091	Sipa1l1/Lrfn4/Lrrc4b/Ophn1/Gphn
GO:2000727	positive regulation of cardiac muscle cell differentiation	5/1687	20/17970	0.0340091	Bmp4/Myocd/Fdps/Ep300/Grem1
GO:0051149	positive regulation of muscle cell differentiation	10/1687	56/17970	0.0340321	Tmsb4x/Bmp4/Myocd/Fdps/Cth/Ccl8/Ep300/Cd53/Grem1/Gper1
GO:1902905	positive regulation of supramolecular fiber organization	21/1687	147/17970	0.0341402	Cyfip1/Ppm1f/Slain2/Tac1/Ep300/Cdkn1b/Pdxp/Sh3pxd2b/Spast/Togaram1/Limch1/Pde4dip/Mapt/F2rl1/Mapre1/Wasl/Alox15/Tgfbr1/Synpo2/Actr3/Mecp2
GO:0000165	MAPK cascade	61/1687	515/17970	0.0343646	Wnt5a/Tab1/Ctnnb1/Zc3h12a/Dynlt1c/Ppia/Ccnq/Fgf9/Bmp4/Ccn1/Slc30a10/Bnip2/Pik3cg/Ror2/Map3k21/Avpi1/Gpr55/Unc5cl/Traf3/Map3k7/Ccl8/Mid1/Spry2/Fgfr3/Prkn/Adrb3/Zfp36l2/Nbr1/Ccl20/Mturn/Ccl9/Ppp1cb/Ercc6/Il18/Map3k13/Pik3r5/Nqo2/Epha2/Cd27/Ccl22/Sh3rf2/Styx/Pak6/Nptn/F2rl1/Map3k20/Atp6ap2/Gper1/Lbh/Rell2/Ptger4/Sirpa/Tlr13/Dstyk/Pik3r6/Spred1/Alox15/Dusp6/Tgfbr1/Dnaja1/Tgfa
GO:0023014	signal transduction by protein phosphorylation	61/1687	515/17970	0.0343646	Wnt5a/Tab1/Ctnnb1/Zc3h12a/Dynlt1c/Ppia/Ccnq/Fgf9/Bmp4/Ccn1/Slc30a10/Bnip2/Pik3cg/Ror2/Map3k21/Avpi1/Gpr55/Unc5cl/Traf3/Map3k7/Ccl8/Mid1/Spry2/Fgfr3/Prkn/Adrb3/Zfp36l2/Nbr1/Ccl20/Mturn/Ccl9/Ppp1cb/Ercc6/Il18/Map3k13/Pik3r5/Nqo2/Epha2/Cd27/Ccl22/Sh3rf2/Styx/Pak6/Nptn/F2rl1/Map3k20/Atp6ap2/Gper1/Lbh/Rell2/Ptger4/Sirpa/Tlr13/Dstyk/Pik3r6/Spred1/Alox15/Dusp6/Tgfbr1/Dnaja1/Tgfa
GO:2001243	negative regulation of intrinsic apoptotic signaling pathway	11/1687	64/17970	0.0347765	Pdx1/Ddx3x/Ppia/Vnn1/Prkn/Ell3/Wfs1/Marchf7/Usp47/Atad5/Dnaja1
GO:0001704	formation of primary germ layer	13/1687	80/17970	0.0348368	Leo1/Wnt5a/Ctnnb1/Mmp2/Bmp4/Inhba/Atoh8/Itgb4/Lamb3/Hnf1b/Epha2/Col8a1/Foxc1
GO:0043393	regulation of protein binding	22/1687	156/17970	0.0348412	Wnt5a/Poldip2/Aurka/Bmp4/Ppp2ca/Ccpg1/Nes/Ep300/Prkn/Ddx11/Gas8/Styx/Ttbk2/Mapre1/Adnp/Gper1/Grem2/Tgfbr1/Rfng/Trim21/Cblb/Mecp2
GO:0015980	energy derivation by oxidation of organic compounds	29/1687	218/17970	0.0349606	Mtch2/Gaa/Cox7a1/Coa6/Sdha/Gyg/Uqcrc1/Lyrm7/Ino80dos/COX2/Ndufs6b/Uqcrq/Ppp1cb/Ndufb9/Per2/Atp5d/Ppp1r3d/Tigar/Etfrf1/Ndufv3/Cox8b/Gpd1/Gm6293/Uqcrb/Phkb/Pask/Cox4i1/Cox5b/Epm2aip1
GO:0001763	morphogenesis of a branching structure	20/1687	139/17970	0.0355885	Wnt5a/Ctnnb1/Bmp4/Fkbpl/Adm/Nrarp/Lama1/Spry2/Pitx2/Wnt9b/Map3k13/Sox8/Hnf1b/Mgp/Epha2/Lgr4/Grem1/Pgf/Btbd7/Mecp2
GO:0050714	positive regulation of protein secretion	16/1687	105/17970	0.035622	Pdx1/Rph3al/Myh10/Ppia/Exph5/Cd2ap/Gpr27/Ep300/Prkn/Gip/F2rl1/Gper1/Ptger4/Rapgef4/Tmed10-ps/Unc13b
GO:0009187	cyclic nucleotide metabolic process	7/1687	34/17970	0.0358009	Adcy6/Gucy1a1/Pde8b/Epha2/Adcy4/Adcy1/Gucy1b1
GO:0010559	regulation of glycoprotein biosynthetic process	7/1687	34/17970	0.0358009	Ctnnb1/Pomt2/Abca2/Pomt1/Pawr/Ep300/Pxylp1
GO:0048546	digestive tract morphogenesis	7/1687	34/17970	0.0358009	Wnt5a/Ctnnb1/Bmp4/Pitx2/Ephb3/Stra6/Hnf1b
GO:1903320	regulation of protein modification by small protein conjugation or removal	24/1687	174/17970	0.0358692	Hspa5/Egr1/Ctnnb1/Ddx3x/Zc3h12a/Ppia/Uba2/Spry2/Caml/Prkn/Prmt3/Peli1/Per2/Arrdc4/Wfs1/Sh3rf2/Tnfaip3/Marchf7/Septin4/Dcun1d4/Tgfbr1/Dnaja1/Trim21/Cblb
GO:1901136	carbohydrate derivative catabolic process	18/1687	122/17970	0.0359177	Nudt1/Edem1/Acot7/Entpd4/Aldh1a1/Nudt7/Entpd4b/Itpa/Pglyrp1/Pde8b/Nt5e/Upb1/Entpd1/Ada/Gpd1/Edem2/Lyve1/Gm52783
GO:0009218	pyrimidine ribonucleotide metabolic process	6/1687	27/17970	0.0360004	Uck2/Nme6/Entpd4/Entpd4b/Nme7/Dhodh
GO:0045197	establishment or maintenance of epithelial cell apical/basal polarity	6/1687	27/17970	0.0360004	Wnt5a/Arf4/Sh3bp1/Lama1/Tcf15/Ophn1
GO:0045987	positive regulation of smooth muscle contraction	6/1687	27/17970	0.0360004	Myocd/Pawr/Edn2/Ada/Gper1/Tbxa2r
GO:0006390	mitochondrial transcription	4/1687	14/17970	0.036017	Chchd10/Tefm/Slc25a33/Tfb1m
GO:0035268	protein mannosylation	4/1687	14/17970	0.036017	Pomt2/Pomt1/Nus1/Large2
GO:0035372	protein localization to microtubule	4/1687	14/17970	0.036017	Mid1/Ttbk2/Mapre1/Abhd17b
GO:0035751	regulation of lysosomal lumen pH	4/1687	14/17970	0.036017	Tmem106b/Tmem165/Tmem199/Atp6ap2
GO:0042407	cristae formation	4/1687	14/17970	0.036017	Chchd10/Samm50/Adck1/Immt
GO:0045217	cell-cell junction maintenance	4/1687	14/17970	0.036017	Cd177/Pkp2/Prtn3/F2rl1
GO:0045986	negative regulation of smooth muscle contraction	4/1687	14/17970	0.036017	Gucy1a1/Arhgap42/Calcrl/Ptger4
GO:0060602	branch elongation of an epithelium	4/1687	14/17970	0.036017	Wnt5a/Bmp4/Spry2/Hnf1b
GO:0070071	proton-transporting two-sector ATPase complex assembly	4/1687	14/17970	0.036017	Fmc1/Vma21/Atp5d/Tmem199
GO:0016567	protein ubiquitination	62/1687	526/17970	0.0360752	Rnf213/Fbxo31/Hspa5/Leo1/Katna1/Rnf34/Ctnnb1/Ddx3x/Ubr3/Mkrn2/Ppia/Cul4a/Dda1/Rnf4/Traf3/Dtl/Tulp4/Spry2/Caml/Trim72/Prkn/Anapc16/Prmt3/Peli1/Klhl7/Fbxo33/Per2/Dcaf6/Dtx4/Btbd1/Pcnp/Arrdc4/Dtx3/Cul1/Wac/Shprh/Wfs1/Mylip/Sh3rf2/Tnfaip3/Tnks/Marchf7/Klhl42/Cul7/Rnf146/Klhl8/Med18/Rnf135/Gm39210/Septin4/Fbxo45/Dcun1d4/Rnf103/Neurl2/Klhl13/Klhl9/Tgfbr1/Dnaja1/Fbxo32/Trim21/Cblb/Rnft1
GO:0042733	embryonic digit morphogenesis	9/1687	49/17970	0.0367008	Wnt5a/Ctnnb1/Lrp4/Tbx2/Bmp4/Ror2/Wdpcp/Ttbk2/Map3k20
GO:0051057	positive regulation of small GTPase mediated signal transduction	9/1687	49/17970	0.0367008	Bnip2/Pik3cg/Gpr55/Gpr20/Adgrg1/F2rl2/Shoc2/F2rl1/Gpr4
GO:0097194	execution phase of apoptosis	9/1687	49/17970	0.0367008	Rnf34/Zc3h12a/Casp8/Gper1/Xkr4/Casp1/Exog/Dffb/Xkr6
GO:0061458	reproductive system development	45/1687	366/17970	0.0369	Krt19/Nudt1/Hspa5/Wnt5a/Nasp/Ctnnb1/Mmp2/Fgf9/Bmp4/Myocd/Ccn1/Inhba/Adm/Dcn/Ror2/Gjb1/Patz1/Tyro3/Adgrg1/Rec8/Ccdc134/Chd7/Pitx2/Plekha1/Cdkn1b/Arid4a/Cdkn1c/Prlr/Wnt9b/Ndufs6b/Stra6/Sox8/Hnf1b/Edn2/Gm2788/Lgr4/Cul7/Ada/Ptger4/Foxc1/Ppp1r9b/Tgfbr1/Nos3/Syna/Star
GO:0043434	response to peptide hormone	37/1687	292/17970	0.03716	Slc2a4/Egr1/Kcnq1/Cyfip1/Sesn3/Slc30a10/Adm/Ppp2ca/Slc26a6/Reg3a/Cdkn1b/Trim72/Nr4a1/Slc27a1/Fads1/Meak7/Zbed3/Nos1/Gip/Il18/Reg1/Eif2b3/Sesn2/Slc25a33/Nucb2/Serpina3g/Gper1/Abcg2/Fut7/Sort1/Egr2/Otc/Cox5b/Epm2aip1/Dennd4c/Star/Timp1
GO:0007088	regulation of mitotic nuclear division	17/1687	114/17970	0.037203	Smpd3/Nme6/Bmp4/Mad1l1/Riok2/Birc5/Zwint/Cdkn1b/Cdkn1c/Gm33950/Pdxp/Tnks/Spdl1/Cul7/Xrcc3/2700099C18Rik/Tgfa
GO:0099504	synaptic vesicle cycle	17/1687	114/17970	0.037203	Ctnnb1/Cyfip1/Bltp1/Rims2/Dgkq/Syp/Sptbn2/Pld1/Rab5a/Ophn1/Rapgef4/Adcy1/Gm31336/Cadps2/Sv2a/Sh3gl2/Unc13b
GO:0010562	positive regulation of phosphorus metabolic process	89/1687	788/17970	0.0373647	Ccnd1/Wnt5a/Tab1/Egr1/Cldn3/Ctnnb1/Ddx3x/Dab1/Lrp4/Zc3h12a/Ppia/Ccnq/Ltf/Fgf9/Bmp4/Ccn1/Inhba/Slc30a10/Bnip2/Camta1/Cdca2/Pik3cg/Ppp2ca/Ror2/Map3k21/Avpi1/Gpr55/Bmp3/Dgkq/Unc5cl/Traf3/Map3k7/Ccl8/Pawr/Tyro3/Mid1/Spry2/Ep300/Fgfr3/Cdkn1b/Prkn/Slc27a1/Adrb3/Ppp1r9a/Ccl20/Mturn/Ccl9/Prlr/COX2/Nos1/Ephb3/Irgm2/Ercc6/Il18/Map3k13/Tigar/Limch1/Pik3r5/Nqo2/Epha2/Cd27/Ccl22/Sh3rf2/Mavs/Pak6/Grem1/Nptn/Gp…
GO:0045937	positive regulation of phosphate metabolic process	89/1687	788/17970	0.0373647	Ccnd1/Wnt5a/Tab1/Egr1/Cldn3/Ctnnb1/Ddx3x/Dab1/Lrp4/Zc3h12a/Ppia/Ccnq/Ltf/Fgf9/Bmp4/Ccn1/Inhba/Slc30a10/Bnip2/Camta1/Cdca2/Pik3cg/Ppp2ca/Ror2/Map3k21/Avpi1/Gpr55/Bmp3/Dgkq/Unc5cl/Traf3/Map3k7/Ccl8/Pawr/Tyro3/Mid1/Spry2/Ep300/Fgfr3/Cdkn1b/Prkn/Slc27a1/Adrb3/Ppp1r9a/Ccl20/Mturn/Ccl9/Prlr/COX2/Nos1/Ephb3/Irgm2/Ercc6/Il18/Map3k13/Tigar/Limch1/Pik3r5/Nqo2/Epha2/Cd27/Ccl22/Sh3rf2/Mavs/Pak6/Grem1/Nptn/Gp…
GO:0051495	positive regulation of cytoskeleton organization	23/1687	166/17970	0.0375969	Cyfip1/Ppm1f/Slain2/Tac1/Nes/Ep300/Cdkn1b/Cep295/Pdxp/Sh3pxd2b/Spast/Togaram1/Limch1/Pde4dip/Mapt/F2rl1/Mapre1/Wasl/Alox15/Tgfbr1/Synpo2/Actr3/Mecp2
GO:0008589	regulation of smoothened signaling pathway	10/1687	57/17970	0.0379316	Fgf9/Txndc15/Gorab/Uchl5/Gas8/Tedc1/Ttbk2/Glis2/Megf8/Cdk20
GO:0006720	isoprenoid metabolic process	13/1687	81/17970	0.0380685	Rdh12/Pdss2/Fdps/Aldh1a1/Prmt3/Rdh1/Dhrs13/Amacr/Nus1/Crabp1/Hmgcr/Gm32342/Star
GO:0021549	cerebellum development	13/1687	81/17970	0.0380685	Hspa5/Dab1/Gnpat/Pdss2/Sptbn2/Uqcrq/Herc1/Faim2/Ophn1/Ttbk2/Foxc1/Cntn1/Mecp2
GO:0043200	response to amino acid	13/1687	81/17970	0.0380685	Pdx1/Mmp2/Sesn3/Cdkn1b/Prkn/Meak7/Amigo1/Gip/Sesn2/Col16a1/Dnmt3b/Ppp1r9b/Zeb1
GO:0042471	ear morphogenesis	12/1687	73/17970	0.0384433	Wnt5a/Kcnq1/Itga8/Fgf9/Ror2/Sobp/Spry2/Chd7/Sec24b/Wdpcp/Cep290/Zeb1
GO:0001657	ureteric bud development	11/1687	65/17970	0.0384456	Ctnnb1/Arg2/Bmp4/Wnt9b/Smad9/Sox8/Hnf1b/Lgr4/Grem1/Pgf/Foxc1
GO:0046434	organophosphate catabolic process	18/1687	123/17970	0.0385271	Smpd3/Acot7/Impa1/Entpd4/Nudt7/Entpd4b/Itpa/Pde8b/Pdxp/Nt5e/Mtmr2/Entpd1/Ada/Gpd1/Smpdl3a/Enpp5/Pla2g4c/Gm52783
GO:0043062	extracellular structure organization	29/1687	220/17970	0.0387497	Smpd3/Itga8/Mmp2/Crispld2/Lamb2/Ccn1/Dpt/Noxo1/Pomt1/Tcf15/Ecm2/Spock2/Elf3/Col15a1/Smoc2/Sh3pxd2b/Lamb3/Crtap/Ccdc80/Postn/Col8a1/Grem1/Col16a1/Foxc1/Col8a2/Tgfbr1/Thsd4/Kazald1/Adamts19
GO:0032984	protein-containing complex disassembly	21/1687	149/17970	0.0387704	Tmod3/Sh3bp1/Eps8/Shfl/Mid1/Nes/Sptbn2/Pdxp/Irgm2/Spast/Per2/Jmjd4/Capza2/H2ac25/Ttbk2/F2rl1/Plekhh2/Fyco1/Avil/Ppp1r9b/Sh3gl2
GO:0009991	response to extracellular stimulus	49/1687	405/17970	0.0390469	Nudt1/Hspa5/Pdx1/Zc3h12a/Kptn/Sord/Kcnb1/Myocd/Sesn3/Gnpat/Adm/Slc38a2/Pdia3/Nuak2/Dgkq/P2rx6/Igfbp2/Mn1/Pitx2/Prkn/Npy/Adrb3/Fads1/Meak7/Wnt9b/Amigo1/Pdxp/Gip/Cpt1a/Mapt/Sgip1/Reg1/Postn/Tnks/Sesn2/Mios/Ada/Nucb2/Dapl1/Adnp/Bche/Abcg2/Casp1/Cox4i1/Hlcs/Dnmt3b/Otc/Tbxa2r/Star
GO:0051272	positive regulation of cellular component movement	49/1687	405/17970	0.0390469	Tmsb4x/Fbxo31/Hspa5/Wnt5a/Egr1/Cldn3/Mmp2/Zc3h12a/Mgat5/Gm12854/Ppm1f/Fgf9/Bmp4/Ccn1/Tac1/Pik3cg/Duoxa2/Ror2/Atoh8/Adgra2/Pawr/Spry2/Rin2/Sema6c/Ccl20/Smoc2/Bcl6/Il18/Edn2/Nus1/Rab5a/Atp5b/Cdh13/Sh3rf2/Dock1/Postn/Adam10/F2rl1/Pgf/Gper1/Ptger4/Rapgef4/Fut7/Tnfrsf18/Megf8/Tgfbr1/Synpo2/Nos3/Mecp2
GO:0043069	negative regulation of programmed cell death	84/1687	741/17970	0.0391463	Lamtor5/Hspa5/Pdx1/Wnt5a/Tmbim4/Rnf34/Ctnnb1/Ddx3x/Arg2/Zc3h12a/Aurka/Ppia/Ltf/Bmp4/Myocd/Ccn1/Slc30a10/Arf4/Pik3cg/Naip1/Kifap3/Birc5/Nuak2/Casp8/Cth/Map3k7/Tyro3/Nes/Spry2/Vnn1/Ep300/Hspb6/Ifit3/Nat8/Cdkn1b/Nr4a1/Prkn/Capn13/Dcps/Prlr/Peli1/Pcp4/Nos1/Meis3/Ell3/Csnk2a1-ps3/Tmem132a/Ier3/Bcl6/Draxin/Bnip3l-ps/Il18/Tigar/Sox8/Sgk3/Hnf1b/Eya2/Wfs1/Faim2/Cd27/Sh3rf2/Tnfaip3/Yme1l1/Marchf7/Grem1/Ada…
GO:0046579	positive regulation of Ras protein signal transduction	8/1687	42/17970	0.0392061	Pik3cg/Gpr55/Gpr20/Adgrg1/F2rl2/Shoc2/F2rl1/Gpr4
GO:0051187	cofactor catabolic process	8/1687	42/17970	0.0392061	Cyp4f40/Acot7/Nudt7/Pdxp/Nqo2/Cyp4f18/Cat/Chac2
GO:0060675	ureteric bud morphogenesis	8/1687	42/17970	0.0392061	Ctnnb1/Bmp4/Wnt9b/Sox8/Hnf1b/Lgr4/Grem1/Pgf
GO:0072528	pyrimidine-containing compound biosynthetic process	8/1687	42/17970	0.0392061	Agpat4/Uck2/Nme6/Gm5867/Nme7/Lclat1/Dhodh/Agpat5
GO:0006473	protein acetylation	19/1687	132/17970	0.0396254	Ddx3x/Myocd/Bmal1/Map3k7/Phf20l1/Naa25/Ep300/Nat8/Cep295/Gm33950/Nos1/Setd5/Esco1/Fam161a/Msx3/Zzz3/Kat14/Mecp2/Terf2ip
GO:0010639	negative regulation of organelle organization	39/1687	312/17970	0.0397117	Tmsb4x/Phf8/Nme6/Ctc1/Tmod3/Bmp4/Mad1l1/Eps8/Birc5/Mid1/Zwint/Prkn/Wapl/Ppp1r9a/Sptbn2/Adck1/Arhgap6/Tigar/Terf1/Mtf2/Mapt/Usp30/Capza2/Tnks/Spdl1/Odf2l/Msx3/Ttbk2/Tbc1d30/Mapre1/Plekhh2/Nbdy/Avil/Xrcc3/2700099C18Rik/Dnmt3b/Dcp2/Pif1/Terf2ip
GO:0001505	regulation of neurotransmitter levels	34/1687	266/17970	0.0398046	Smpd3/Zc3h12a/Rims2/Kmo/Aldh1a1/Maob/Slc30a1/Ddah1/Nr4a1/Prkn/Ppp1r9a/Gm9199/Syp/Sptbn2/Nos1/Aldh5a1/Per2/1700034H15Rik/Upb1/Rab5a/Rhot1/Ddah2/Gper1/Bche/Ptger4/Adcy1/Kcnc3/Sirpa/Gm31336/Cadps2/Sv2a/Shmt1/Unc13b/Nos3
GO:0033157	regulation of intracellular protein transport	20/1687	141/17970	0.0405255	Edem1/Zc3h12a/Wipf1/Bmp4/Kcnb1/Riok2/Ppp2ca/Ep300/Pcm1/Bnip3l-ps/Tmem30b/Gm32340/Mief1/Mavs/Ctdspl2/Edem2/Gper1/Prr5l/Hspa1l/Cep290
GO:0030326	embryonic limb morphogenesis	14/1687	90/17970	0.0406422	Wnt5a/Ctnnb1/Lrp4/Tbx2/Fgf9/Bmp4/Ror2/Chd7/Pitx2/Wdpcp/Grem1/Ttbk2/Map3k20/Megf8
GO:0032612	interleukin-1 production	14/1687	90/17970	0.0406422	Wnt5a/Egr1/Arg2/Zc3h12a/Hk1/Casp8/Ccl20/Serpinb1a/Tnfaip3/F2rl1/Ptger4/Casp1/Sirpa/Tmed10-ps
GO:0032652	regulation of interleukin-1 production	14/1687	90/17970	0.0406422	Wnt5a/Egr1/Arg2/Zc3h12a/Hk1/Casp8/Ccl20/Serpinb1a/Tnfaip3/F2rl1/Ptger4/Casp1/Sirpa/Tmed10-ps
GO:0035113	embryonic appendage morphogenesis	14/1687	90/17970	0.0406422	Wnt5a/Ctnnb1/Lrp4/Tbx2/Fgf9/Bmp4/Ror2/Chd7/Pitx2/Wdpcp/Grem1/Ttbk2/Map3k20/Megf8
GO:0007346	regulation of mitotic cell cycle	40/1687	322/17970	0.0409258	Ccnd1/Fbxo31/Smpd3/Nme6/Poldip2/Ctc1/Cdc25a/Ctnnb1/Ddx3x/Bmp4/Cul4a/Mad1l1/Riok2/Cenpf/Birc5/Dtl/Zwint/Cdkn1b/Zfp36l2/Cdkn1c/Smoc2/Gm33950/Pdxp/Ticrr/Thap1/Wac/Zfp655/Gm46764/Tnks/Spdl1/Cul7/Map3k20/Usp47/Foxc1/Xrcc3/2700099C18Rik/Atad5/Tgfa/Rbl2/Mecp2
GO:1901652	response to peptide	43/1687	350/17970	0.0410047	Slc2a4/Smpd3/Egr1/Kcnq1/Mmp2/Cyfip1/Sesn3/Slc30a10/Adm/Ppp2ca/Slc26a6/Reg3a/Cdkn1b/Trim72/Nr4a1/Slc27a1/Fads1/Meak7/Klf11/Zbed3/Nos1/Gip/Il18/Ddx11/Reg1/Tnfaip3/Eif2b3/Sesn2/Slc25a33/Nucb2/Serpina3g/Gper1/Abcg2/Fut7/Sort1/Egr2/Ppp1r9b/Otc/Cox5b/Epm2aip1/Dennd4c/Star/Timp1
GO:0035987	endodermal cell differentiation	7/1687	35/17970	0.0412555	Leo1/Ctnnb1/Mmp2/Inhba/Lamb3/Hnf1b/Col8a1
GO:0071357	cellular response to type I interferon	7/1687	35/17970	0.0412555	Wnt5a/Ifitm2/Ifit1bl2/Ythdf2/Dcst1/Mavs/Ifit1bl1
GO:0140056	organelle localization by membrane tethering	7/1687	35/17970	0.0412555	Stx6/Rims2/Kcnb1/Bloc1s6/Bves/Unc13b/Cep290
GO:0032786	positive regulation of DNA-templated transcription, elongation	5/1687	21/17970	0.0412937	Leo1/Ctnnb1/Ell2/Ell3/Ercc6
GO:0043278	response to morphine	5/1687	21/17970	0.0412937	Tac1/Gnao1/Ada/Abcg2/Ppp1r9b
GO:0048013	ephrin receptor signaling pathway	5/1687	21/17970	0.0412937	Sipa1l1/Ephb3/Epha2/Efnb2/Efna3
GO:0061339	establishment or maintenance of monopolar cell polarity	5/1687	21/17970	0.0412937	Wnt5a/Sh3bp1/Lama1/Tcf15/Ophn1
GO:0099084	postsynaptic specialization organization	5/1687	21/17970	0.0412937	Sipa1l1/Lrfn4/Lrrc4b/Ophn1/Gphn
GO:1903426	regulation of reactive oxygen species biosynthetic process	13/1687	82/17970	0.0415071	Smpd3/Arg2/Zc3h12a/Slc30a10/Zfp13/Duoxa2/Slc5a3/Ddah1/Prkn/COX2/Slc25a33/Ddah2/Sirpa
GO:2000145	regulation of cell motility	74/1687	646/17970	0.0415274	Tmsb4x/Fbxo31/Smpd3/Hspa5/Wdr44/Wnt5a/Egr1/Cldn3/Mmp2/Zc3h12a/Eppk1/Mgat5/Gm12854/Ppm1f/Fgf9/Bmp4/Myocd/Ccn1/Tac1/Dcn/Pik3cg/Duoxa2/Sh3bp1/Mtus1/Lama1/Ror2/Atoh8/Patz1/Adgra2/Pawr/Adgrg1/Spry2/Pitx2/Rin2/Sema6c/Ccl20/Pkp2/Meak7/Smoc2/Il18/Limch1/Edn2/Nus1/Rab5a/Epha2/Atp5b/Cdh13/Sh3rf2/Dock1/Wdpcp/Postn/Grem1/Ttbk2/Ada/Adam10/F2rl1/Pgf/Gper1/Ptger4/Rapgef4/Fut7/Srcin1/Tnfrsf18/Prr5l/Spred1/Dpysl2…
GO:0030036	actin cytoskeleton organization	61/1687	521/17970	0.0418099	Tmsb4x/Parva/Krt19/Gas2l3/Marcks/Cldn3/Myh10/Cyfip1/Kptn/Wipf1/Tmod3/Arhgef17/Ppm1f/Tac1/Stard8/Cd2ap/Sh3bp1/Eps8/Shroom1/Nuak2/Pawr/Gm15337/Ep300/Washc3/Prkn/Ppp1r9a/Coro2b/Zbed3/Sptbn2/Sipa1l1/Gm52861/Pdxp/Myo19/Sh3pxd2b/Arhgap6/Abi1/Bcl6/Sorbs3/Limch1/Snora73b/Capza2/Ophn1/Cdc42bpa/Ehbp1/F2rl1/Akap11/Plekhh2/Sh3kbp1/Ptger4/Sirpa/Avil/Abitram/Ppp1r9b/Wasl/Alox15/Dpysl2/Gm40363/Gm53330/Tgfbr1/Sy…
GO:0051056	regulation of small GTPase mediated signal transduction	22/1687	159/17970	0.0418242	Bnip2/Stard8/Pik3cg/Cd2ap/Sh3bp1/Gpr55/Gpr20/Gm38514/Adgrg1/Spry2/Gm15337/Sipa1l1/Arhgap42/Bcl6/F2rl2/Shoc2/Ophn1/Cdc42bpa/F2rl1/Gm52186/Gpr4/Dennd4c
GO:0070585	protein localization to mitochondrion	12/1687	74/17970	0.04212	Mtch2/Hk1/Timm9/Timm17b/Gm30251/Prkn/Samm50/Bnip3l-ps/Mapt/Gm20604/Hspa1l/Dnaja1
GO:1901216	positive regulation of neuron death	12/1687	74/17970	0.04212	Wnt5a/Egr1/Ctnnb1/Tac1/Kmo/Casp8/Pawr/Elk1/Nos1/Il18/Mapt/Nqo2
GO:0010822	positive regulation of mitochondrion organization	10/1687	58/17970	0.0421288	Aurka/Zfp13/Dcn/Chchd10/Prkn/Adck1/Mief1/Gm20604/Gper1/Hspa1l
GO:0000038	very long-chain fatty acid metabolic process	6/1687	28/17970	0.0423048	Elovl6/Hacd2/Elovl5/Acot4/Cyp4f18/Acot2
GO:0000132	establishment of mitotic spindle orientation	6/1687	28/17970	0.0423048	Dynlt1c/Cenpa/Spry2/Sapcd2/Spdl1/2700099C18Rik
GO:1901659	glycosyl compound biosynthetic process	6/1687	28/17970	0.0423048	Nme6/Lcmt2/Nt5e/Tyw1/Nme7/Ada
GO:1902686	mitochondrial outer membrane permeabilization involved in programmed cell death	6/1687	28/17970	0.0423048	Zfp13/Chchd10/Bnip3l-ps/Eya2/Rhot1/Gm20604
GO:0006457	protein folding	19/1687	133/17970	0.0423236	Hspa5/Trap1/Dnajc10/Gm13612/Ppia/Fkbp11/Pdia3/Hspb6/Calr/Cct4/Crtap/Fkbp2/Zmynd10/Sgtb/Dnaja4/Hspa1l/Dnaja1/Gm10069/Tbca
GO:0120032	regulation of plasma membrane bounded cell projection assembly	19/1687	133/17970	0.0423236	Cyfip1/Cep135/Ppp1r9a/Pld1/Rab5a/Epha2/Wdpcp/Vdac3/Odf2l/Ttbk2/Tbc1d30/F2rl1/Zmynd10/Avil/Abitram/Dock11/Dpysl2/Tgfbr1/Mns1
GO:0030048	actin filament-based movement	11/1687	66/17970	0.042376	Parva/Kcnq1/Myh10/Wipf1/Rangrf/Pkp2/Nos1/Myo19/Limch1/Kcne3/Dsp
GO:0072163	mesonephric epithelium development	11/1687	66/17970	0.042376	Ctnnb1/Arg2/Bmp4/Wnt9b/Smad9/Sox8/Hnf1b/Lgr4/Grem1/Pgf/Foxc1
GO:0072164	mesonephric tubule development	11/1687	66/17970	0.042376	Ctnnb1/Arg2/Bmp4/Wnt9b/Smad9/Sox8/Hnf1b/Lgr4/Grem1/Pgf/Foxc1
GO:1903321	negative regulation of protein modification by small protein conjugation or removal	11/1687	66/17970	0.042376	Ctnnb1/Ppia/Spry2/Caml/Prmt3/Per2/Sh3rf2/Tnfaip3/Marchf7/Dnaja1/Trim21
GO:0031667	response to nutrient levels	46/1687	379/17970	0.0424179	Hspa5/Pdx1/Zc3h12a/Kptn/Sord/Kcnb1/Sesn3/Gnpat/Adm/Slc38a2/Pdia3/Nuak2/Dgkq/P2rx6/Igfbp2/Mn1/Pitx2/Prkn/Npy/Adrb3/Fads1/Meak7/Wnt9b/Amigo1/Pdxp/Gip/Cpt1a/Mapt/Sgip1/Reg1/Postn/Tnks/Sesn2/Mios/Ada/Nucb2/Dapl1/Bche/Abcg2/Casp1/Cox4i1/Hlcs/Dnmt3b/Otc/Tbxa2r/Star
GO:0044262	cellular carbohydrate metabolic process	29/1687	222/17970	0.0428385	Mtch2/Pgam1/Gaa/Sord/Impa1/Ppip5k1/Gyg/Gm46840/Dgkq/Slc5a3/Ep300/Prkn/Pdxp/Ppp1cb/Fam3a/Per2/Ppp1r3d/Tigar/Mtmr2/Sesn2/Gper1/Mogat2/Phkb/Abcg2/Pask/Glb1/Epm2aip1/Mecp2/Supt20
GO:0001889	liver development	17/1687	116/17970	0.0429223	Pdx1/Aurka/Bmp4/Elk1/Csnk2a1-ps3/Cpt1a/Il18/Hnf1b/Upb1/Reg1/Gm2788/Tnfaip3/Dnaaf1/Ada/Otc/Proc/Tgfa
GO:0060548	negative regulation of cell death	91/1687	813/17970	0.0430356	Lamtor5/Hspa5/Pdx1/Wnt5a/Tmbim4/Rnf34/Ctnnb1/Ddx3x/Arg2/Zc3h12a/Aurka/Ppia/Ltf/Bmp4/Myocd/Ccn1/Tac1/Slc30a10/Arf4/Pik3cg/Naip1/Kifap3/Birc5/Rnf4/Nuak2/Casp8/Cth/Map3k7/Tyro3/Nes/Spry2/Vnn1/Ep300/Hspb6/Ifit3/Nat8/Cdkn1b/Nr4a1/Prkn/Capn13/Dcps/Meak7/Prlr/Peli1/Pcp4/Nos1/Meis3/Ell3/Csnk2a1-ps3/Tmem132a/Ier3/Bcl6/Draxin/Bnip3l-ps/Il18/Tigar/Sox8/Sgk3/Hnf1b/Eya2/Wfs1/Faim2/Npas2/Cd27/Sh3rf2/Tnfaip3/Ym…
GO:0044782	cilium organization	35/1687	277/17970	0.0431813	Parva/Kcnq1/Kifap3/Cep135/Jhy/Cep162/Pcm1/Txndc15/Iqcb1/Gorab/Ift56/Togaram1/Galnt11/Gm47324/Dnaaf2/Gas8/Ptpdc1/Fam161a/Wdpcp/Dnaaf1/Cfap157/Vdac3/Odf2l/Ttbk2/Tbc1d30/Cep19/Bbof1/Armc2/Zmynd10/Mapre1/2700049A03Rik/Avil/Mns1/Macir/Cep290
GO:0010817	regulation of hormone levels	49/1687	408/17970	0.0435517	Ywhah/Smpd3/Pdx1/Rph3al/Egr1/Kcnq1/Rims2/Dkk3/Rdh12/Kcnb1/Inhba/Tac1/Adm/Aldh1a1/Duoxa2/Birc5/Bmal1/Gpr27/Dgkq/Chd7/Plekha1/Prkn/Dhcr7/Prmt3/Slco4a1/Nos1/H6pd/Pde8b/Gip/Cpt1a/Per2/Sox8/Hnf1b/Edn2/Ica1/Nucb2/Crabp1/Atp6ap2/Jagn1/Gper1/Ptger4/Rapgef4/Pask/Cyp46a1/Gm32342/Hmgn3/Cpq/Mecp2/Star
GO:0019933	cAMP-mediated signaling	21/1687	151/17970	0.0438465	Rims2/Adm/Dgkq/Adgrg1/Adrb3/Ptger2/Nos1/Gip/S1pr4/Cxcl11/Cap2/Nucb2/Calcrl/Gper1/Ptger4/Rapgef4/Adcy1/Pde3a/Adgre1/Tbxa2r/Gpr4
GO:0007409	axonogenesis	33/1687	259/17970	0.0439309	Wnt5a/Dab1/Lrp4/Cyfip1/Lamb2/Raph1/Lama1/Nrp2/Ep300/Sema6c/Sema4f/Sipa1l1/Amigo1/Ephb3/Fstl4/Spast/Aatk/Draxin/Map3k13/Mapt/Epha2/Gm46764/Lgr4/Wdr36/Nptn/Adnp/Adcy1/Fbxo45/Slitrk4/Egr2/Dpysl2/Megf8/Zfyve27
GO:0070646	protein modification by small protein removal	18/1687	125/17970	0.0441551	Zc3h12a/Josd1/Usp1/Usp15/Usp43/Uspl1/Eif3f/Uchl5/Usp22/Uchl1/Usp30/Gm12444/Tnfaip3/Usp47/Otud7a/Usp14/Atxn7l3/Trim21
GO:0090066	regulation of anatomical structure size	48/1687	399/17970	0.0442614	Tmsb4x/Smpd3/Wnt5a/Mmp2/Cyfip1/Tmod3/Adm/Sh3bp1/Eps8/Gucy1a1/Ep300/Adrb3/Sema6c/Ppp1r9a/Sptbn2/Arhgap42/Nos1/Wnt9b/Pdxp/Fstl4/Aatk/Draxin/Per2/Pex11b/Map3k13/Hnf1b/Mapt/Edn2/Rab5a/Capza2/Gm46764/Wdr36/Slc12a6/F2rl1/Adnp/Plekhh2/Gper1/Foxc1/Avil/Abitram/Wasl/Alox15/Dpysl2/Megf8/Tbxa2r/Nos3/Actr3/Zfyve27
GO:0050769	positive regulation of neurogenesis	43/1687	352/17970	0.044331	Gdpd5/Fbxo31/Hspa5/Wnt5a/Ctnnb1/Dab1/Cyfip1/Nkx6-2/Dynlt1c/Rims2/Bmp4/Bnip2/Ror2/Ep300/Prkn/Ppp1r9a/Pcp4/Ell3/Amigo1/Cpne9/Bcl6/Tmem106b/Map3k13/Sox8/Mapt/Reg1/Ss18l1/Cul7/Nptn/Slc23a2/Adnp/Gper1/Egr2/Prkch/Avil/Cntn1/Dnmt3b/Megf8/Zfyve27/Cbfa2t2/Mecp2/Star/Zeb1
GO:0031113	regulation of microtubule polymerization	8/1687	43/17970	0.0443562	Slain2/Rangrf/Cdkn1b/Togaram1/Pde4dip/Mapt/Mapre1/Mecp2
GO:0033046	negative regulation of sister chromatid segregation	8/1687	43/17970	0.0443562	Mad1l1/Birc5/Zwint/Wapl/Tnks/Spdl1/Xrcc3/2700099C18Rik
GO:0070936	protein K48-linked ubiquitination	8/1687	43/17970	0.0443562	Rnf34/Ppia/Rnf4/Prkn/Peli1/Cul1/Tnfaip3/Rnf146
GO:0072171	mesonephric tubule morphogenesis	8/1687	43/17970	0.0443562	Ctnnb1/Bmp4/Wnt9b/Sox8/Hnf1b/Lgr4/Grem1/Pgf
GO:1904888	cranial skeletal system development	8/1687	43/17970	0.0443562	Ctnnb1/Bmp4/Slc39a3/Wnt9b/Sh3pxd2b/Cep55/Megf8/Tgfbr1
GO:0016458	gene silencing	22/1687	160/17970	0.0443651	Phf8/Kcnq1/Zc3h12a/Wtip/Bmp4/Myocd/Mrpl44/Scmh1/Morc2a/H2ac8/Pus10/H2ac25/Resf1/Ago4/Prkra/Dydc2/H2aj/Dnmt3b/Bcdin3d/Ago1/Exd1/Mecp2
GO:0010720	positive regulation of cell development	50/1687	418/17970	0.0443949	Gdpd5/Fbxo31/Hspa5/Wnt5a/Ctnnb1/Dab1/Cyfip1/Nkx6-2/Aurka/Dynlt1c/Rims2/Bmp4/Bnip2/Fdps/Ror2/Ep300/Prkn/Ppp1r9a/Pcp4/Ell3/Amigo1/Cpne9/Bcl6/Tmem106b/Map3k13/Sox8/Mapt/Reg1/Dock1/Ss18l1/Cul7/Nptn/Slc23a2/Akap11/Adnp/Gper1/Egr2/Prkch/Avil/Cntn1/Pde3a/Dnmt3b/Proc/Megf8/Olfm4/Zfyve27/Cbfa2t2/Mecp2/Star/Zeb1
GO:0042326	negative regulation of phosphorylation	39/1687	315/17970	0.0449675	Mtch2/Zc3h12a/Dynlt1c/Dnajc10/Ppia/Ppm1f/Bmp4/Myocd/Ppp2ca/Gm46840/Hexim2/Dgkq/Spry2/Cdkn1b/Prkn/Cdkn1c/Zbed3/Pcp4/Nos1/Mvp/Il18/Tigar/Mapt/Sh3rf2/Tnfaip3/Grem1/F2rl1/Pwp1/Gper1/Sirpa/Prr5l/Spred1/Sh3gl2/Ocln/Dusp6/Dnaja1/Ibtk/Cblb/Terf2ip
GO:0051960	regulation of nervous system development	77/1687	678/17970	0.0450344	Ywhah/Gdpd5/Fbxo31/Hspa5/Wnt5a/Katna1/Ctnnb1/Dab1/Lrp4/Cyfip1/Nkx6-2/Dynlt1c/Rims2/Bmp4/Bnip2/Ror2/Bmal1/Adgrg1/Hoxb3/Ep300/Chd7/Pcm1/Prkn/Sema6c/Ppp1r9a/Pcp4/Sipa1l1/Nos1/Ell3/Amigo1/Cpne9/Ephb3/Fstl4/Lrfn4/Gorab/Bcl6/Aatk/Draxin/Tmem106b/Per2/Sec24b/Vstm5/Map3k13/Lrrc4b/Sox8/Setd5/Mtmr2/Mapt/Mylip/Reg1/Ythdf2/Gm46764/Tmem98/Wdr36/Ss18l1/Cul7/Nptn/Slc23a2/Adam10/Adnp/Gper1/Rapgef4/Srcin1/Slitrk4…
GO:0000290	deadenylation-dependent decapping of nuclear-transcribed mRNA	3/1687	9/17970	0.0450675	Dcps/Patl1/Dcp2
GO:0006012	galactose metabolic process	3/1687	9/17970	0.0450675	Il11ra2/Galk2/Glb1
GO:0006171	cAMP biosynthetic process	3/1687	9/17970	0.0450675	Adcy6/Adcy4/Adcy1
GO:0007042	lysosomal lumen acidification	3/1687	9/17970	0.0450675	Tmem106b/Tmem199/Atp6ap2
GO:0009143	nucleoside triphosphate catabolic process	3/1687	9/17970	0.0450675	Itpa/Ada/Smpdl3a
GO:0015937	coenzyme A biosynthetic process	3/1687	9/17970	0.0450675	Acot7/Pank1/Pank4
GO:0016024	CDP-diacylglycerol biosynthetic process	3/1687	9/17970	0.0450675	Agpat4/Lclat1/Agpat5
GO:0019370	leukotriene biosynthetic process	3/1687	9/17970	0.0450675	Lta4h/Pla2g5/Mgst2
GO:0032351	negative regulation of hormone metabolic process	3/1687	9/17970	0.0450675	Dkk3/Prmt3/Pde8b
GO:0032610	interleukin-1 alpha production	3/1687	9/17970	0.0450675	Ccl20/Ptger4/Casp1
GO:0032650	regulation of interleukin-1 alpha production	3/1687	9/17970	0.0450675	Ccl20/Ptger4/Casp1
GO:0032905	transforming growth factor beta1 production	3/1687	9/17970	0.0450675	Cd2ap/Laptm4b/Atp6ap2
GO:0034086	maintenance of sister chromatid cohesion	3/1687	9/17970	0.0450675	Gm33950/Tnks/Sgo2a
GO:0034650	cortisol metabolic process	3/1687	9/17970	0.0450675	Dkk3/Dgkq/H6pd
GO:0035871	protein K11-linked deubiquitination	3/1687	9/17970	0.0450675	Usp30/Tnfaip3/Otud7a
GO:0043201	response to leucine	3/1687	9/17970	0.0450675	Pdx1/Sesn3/Sesn2
GO:0045980	negative regulation of nucleotide metabolic process	3/1687	9/17970	0.0450675	Mtch2/Tigar/Entpd1
GO:0046130	purine ribonucleoside catabolic process	3/1687	9/17970	0.0450675	Entpd4/Entpd4b/Ada
GO:0048262	determination of dorsal/ventral asymmetry	3/1687	9/17970	0.0450675	Ctnnb1/Grem1/Grem2
GO:0060379	cardiac muscle cell myoblast differentiation	3/1687	9/17970	0.0450675	Tbx2/Myocd/Grem1
GO:0070091	glucagon secretion	3/1687	9/17970	0.0450675	Gip/Nucb2/Pask
GO:0070092	regulation of glucagon secretion	3/1687	9/17970	0.0450675	Gip/Nucb2/Pask
GO:0070141	response to UV-A	3/1687	9/17970	0.0450675	Ccnd1/Mmp2/Timp1
GO:0070863	positive regulation of protein exit from endoplasmic reticulum	3/1687	9/17970	0.0450675	Edem1/Tmem30b/Edem2
GO:0071372	cellular response to follicle-stimulating hormone stimulus	3/1687	9/17970	0.0450675	Inhba/Ppp2ca/Star
GO:0072189	ureter development	3/1687	9/17970	0.0450675	Bmp4/Sox8/Nfia
GO:0072224	metanephric glomerulus development	3/1687	9/17970	0.0450675	Egr1/Lamb2/Lgr4
GO:0072393	microtubule anchoring at microtubule organizing center	3/1687	9/17970	0.0450675	Pcm1/Ninl/Cep19
GO:0090185	negative regulation of kidney development	3/1687	9/17970	0.0450675	Ctnnb1/Bmp4/Hnf1b
GO:0098760	response to interleukin-7	3/1687	9/17970	0.0450675	Eno1b/Pdia3/Atp5b
GO:0098761	cellular response to interleukin-7	3/1687	9/17970	0.0450675	Eno1b/Pdia3/Atp5b
GO:0099151	regulation of postsynaptic density assembly	3/1687	9/17970	0.0450675	Sipa1l1/Lrfn4/Lrrc4b
GO:1900426	positive regulation of defense response to bacterium	3/1687	9/17970	0.0450675	Pgc/F2rl1/Unc13b
GO:1900452	regulation of long-term synaptic depression	3/1687	9/17970	0.0450675	Kcnb1/Ppp1r9a/Mapt
GO:1901978	positive regulation of cell cycle checkpoint	3/1687	9/17970	0.0450675	Map3k20/Xrcc3/2700099C18Rik
GO:1903799	negative regulation of production of miRNAs involved in gene silencing by miRNA	3/1687	9/17970	0.0450675	Zc3h12a/Bcdin3d/Mecp2
GO:1904948	midbrain dopaminergic neuron differentiation	3/1687	9/17970	0.0450675	Wnt5a/Ctnnb1/Wnt9b
GO:2000774	positive regulation of cellular senescence	3/1687	9/17970	0.0450675	Hmga1b/Arg2/Pawr
GO:0071496	cellular response to external stimulus	28/1687	214/17970	0.0451448	Nudt1/Hspa5/Zc3h12a/Kptn/Kcnb1/Myocd/Sesn3/Slc38a2/Map3k1/Pdia3/Nuak2/Casp8/Mn1/Prkn/Fads1/Nos1/Wnt9b/Amigo1/Pdxp/Postn/Tnks/Sesn2/Mios/Dapl1/Adnp/Ptger4/Casp1/Nos3
GO:0032231	regulation of actin filament bundle assembly	13/1687	83/17970	0.0451583	Ppm1f/Tac1/Prkn/Ppp1r9a/Gm52861/Sh3pxd2b/Arhgap6/Limch1/Ptger4/Gm40363/Gm53330/Tgfbr1/Synpo2
GO:0044839	cell cycle G2/M phase transition	13/1687	83/17970	0.0451583	Ccnd1/Ctc1/Cdc25a/Cenpf/Birc5/Dtl/Nes/Ticrr/Usp47/2700099C18Rik/Atad5/Kat14/Mecp2
GO:0030855	epithelial cell differentiation	53/1687	447/17970	0.0452032	Nkx6-3/Pdx1/Wnt5a/Kcnq1/Cldn3/Ctnnb1/Eppk1/Bmp4/Lamb2/Exph5/Sh3bp1/Lama1/Atoh8/Bmal1/Spry2/Reg3a/Tcf15/Cdkn1b/Yipf6/Arid4a/Elf3/Col15a1/Cdkn1c/Prlr/Wnt9b/Cpt1a/Krt10/Sec24b/Tigar/Sox8/Hnf1b/Epha2/Gm2788/Wdpcp/Gm31597/Ophn1/Cul7/Grem1/F2rl1/Akap11/Lbh/Foxc1/Prkch/Spred1/Tfcp2l1/Proc/Cep152/Tgfbr1/Ehf/Dsp/Gpr4/Cbfa2t2/Zeb1
GO:1901701	cellular response to oxygen-containing compound	91/1687	815/17970	0.045266	Slc2a4/Smpd3/Hspa5/Pdx1/Wnt5a/Egr1/Kcnq1/Ctnnb1/Mmp2/Cyfip1/Zc3h12a/Ltf/Rdh12/Bmp4/Kcnb1/Sesn3/Inhba/Ndor1/Slc30a10/Kmo/Aldh1a1/Pik3cg/Slc38a2/Ppp2ca/Mgst1/Birc5/Pdia3/Rnf4/Gpr27/Slc26a6/Pawr/Mn1/Plekha1/Elk1/Trim72/Nr4a1/Prkn/Slc27a1/Dcps/Klf11/Gnb5/Ptger2/Nos1/Amigo1/Pdxp/Irgm2/Cpt1a/Scnn1a/Il18/Ddx11/Adprs/Gm46878/Slc26a3/Ly6g2/Reg1/Gnao1/Defa37/Tnfaip3/Sesn2/Aqp8/Rnf146/Slc25a33/Slc23a2/Gpd1/…
GO:1902533	positive regulation of intracellular signal transduction	78/1687	688/17970	0.0453676	Mtch2/Smpd3/Wnt5a/Tab1/Ctnnb1/Ddx3x/Zc3h12a/Ppia/Ccnq/Rheb/Ltf/Fgf9/Bmp4/Slc30a10/Bnip2/Camta1/Dcn/Pik3cg/Ror2/Map3k21/Gucy1a1/Avpi1/Gpr55/Unc5cl/Gpr20/Casp8/Traf3/Cth/Map3k7/Ccl8/Adgrg1/Mid1/Spry2/Ep300/Fgfr3/Prkn/Adrb3/Ccl20/Mturn/Ccl9/Peli1/Nos1/Meis3/Gip/Il18/Stimate/Map3k13/C1qtnf4/Pik3r5/F2rl2/Nqo2/Shoc2/Cd27/Ccl22/Cdh13/Sh3rf2/Mios/Grem1/Nptn/Ada/F2rl1/Map3k20/Ifi35/Gper1/Rell2/Ptger4/Sept…
GO:0006089	lactate metabolic process	4/1687	15/17970	0.0455657	Mtch2/Per2/Tigar/Ldhd
GO:0006882	cellular zinc ion homeostasis	4/1687	15/17970	0.0455657	Slc30a10/Slc30a1/1700034H15Rik/Atp7b
GO:0007257	activation of JUN kinase activity	4/1687	15/17970	0.0455657	Wnt5a/Map3k21/Map3k13/Map3k20
GO:0009070	serine family amino acid biosynthetic process	4/1687	15/17970	0.0455657	Cth/Cbs/Shmt1/Psat1
GO:0009084	glutamine family amino acid biosynthetic process	4/1687	15/17970	0.0455657	Nags/Gls2/Pycr1/Otc
GO:0009435	NAD biosynthetic process	4/1687	15/17970	0.0455657	Kmo/Nmnat3/Kynu/Nmrk1
GO:0017000	antibiotic biosynthetic process	4/1687	15/17970	0.0455657	Duox2/Zfp13/Duoxa2/COX2
GO:0019674	NAD metabolic process	4/1687	15/17970	0.0455657	Kmo/Eno1b/Tigar/Gpd1
GO:0034143	regulation of toll-like receptor 4 signaling pathway	4/1687	15/17970	0.0455657	Ltf/Peli1/F2rl1/Ifi35
GO:0036159	inner dynein arm assembly	4/1687	15/17970	0.0455657	Gm47324/Dnaaf2/Dnaaf1/Zmynd10
GO:0045540	regulation of cholesterol biosynthetic process	4/1687	15/17970	0.0455657	Lpcat3/Fdps/Dhcr7/Erlin1
GO:0050860	negative regulation of T cell receptor signaling pathway	4/1687	15/17970	0.0455657	Slc30a7/Pawr/Btnl2/Cblb
GO:0071786	endoplasmic reticulum tubular network organization	4/1687	15/17970	0.0455657	Reep2/Rab18/Atl3/Zfyve27
GO:0097502	mannosylation	4/1687	15/17970	0.0455657	Pomt2/Pomt1/Nus1/Large2
GO:0099068	postsynapse assembly	4/1687	15/17970	0.0455657	Lrp4/Sipa1l1/Lrfn4/Lrrc4b
GO:0106118	regulation of sterol biosynthetic process	4/1687	15/17970	0.0455657	Lpcat3/Fdps/Dhcr7/Erlin1
GO:1900424	regulation of defense response to bacterium	4/1687	15/17970	0.0455657	Arg2/Pgc/F2rl1/Unc13b
GO:1902254	negative regulation of intrinsic apoptotic signaling pathway by p53 class mediator	4/1687	15/17970	0.0455657	Prkn/Ell3/Marchf7/Atad5
GO:2000810	regulation of bicellular tight junction assembly	4/1687	15/17970	0.0455657	Cldn3/Pkp2/Epha2/Prkch
GO:2001169	regulation of ATP biosynthetic process	4/1687	15/17970	0.0455657	Dnajc30/Prkn/COX2/Entpd1
GO:0042278	purine nucleoside metabolic process	9/1687	51/17970	0.045995	Nudt1/Nme6/Macrod1/Entpd4/Gtpbp1/Entpd4b/Nt5e/Nme7/Ada
GO:0090559	regulation of membrane permeability	9/1687	51/17970	0.045995	Mtch2/Cldn3/Zfp13/Chchd10/Bnip3l-ps/Eya2/Rhot1/Gm20604/Laptm4b
GO:0061008	hepaticobiliary system development	17/1687	117/17970	0.0460068	Pdx1/Aurka/Bmp4/Elk1/Csnk2a1-ps3/Cpt1a/Il18/Hnf1b/Upb1/Reg1/Gm2788/Tnfaip3/Dnaaf1/Ada/Otc/Proc/Tgfa
GO:0001952	regulation of cell-matrix adhesion	12/1687	75/17970	0.0460345	Poldip2/Ppm1f/Rin2/Arhgap6/Bcl6/Limch1/Cdh13/Wdpcp/Postn/Grem1/Col16a1/Ccl28
GO:0019079	viral genome replication	12/1687	75/17970	0.0460345	Ifitm2/Ddx3x/Zc3h12a/Ppia/Ltf/Shfl/Prkn/Morc2a/Isg20/Rab5a/Mavs/Resf1
GO:0031110	regulation of microtubule polymerization or depolymerization	12/1687	75/17970	0.0460345	Slain2/Rangrf/Mid1/Cdkn1b/Spast/Togaram1/Pde4dip/Mapt/Ttbk2/Mapre1/Stmn2/Mecp2
GO:0023061	signal release	43/1687	353/17970	0.0460685	Smpd3/Pdx1/Rph3al/Kcnq1/Rims2/Kcnb1/Inhba/Tac1/Kmo/Adm/Birc5/Bmal1/Gpr27/Chd7/Slc30a1/Nr4a1/Prkn/Ppp1r9a/Syp/Sptbn2/Nos1/Gip/Cpt1a/Per2/1700034H15Rik/Hnf1b/Edn2/Rab5a/Rhot1/Ica1/Nucb2/Jagn1/Gper1/Ptger4/Rapgef4/Adcy1/Pask/Kcnc3/Gm31336/Cadps2/Sv2a/Hmgn3/Unc13b
GO:2001233	regulation of apoptotic signaling pathway	32/1687	251/17970	0.0463389	Mtch2/Pdx1/Rnf34/Ctnnb1/Ddx3x/Ppia/Wwox/Bmp4/Inhba/Zfp13/Chchd10/Pdia3/Casp8/Cth/Map3k7/Vnn1/Prkn/Meis3/Ell3/Sgk3/Eya2/Wfs1/Faim2/Tnfaip3/Gm20604/Marchf7/Gper1/Septin4/Usp47/Atad5/Tgfbr1/Dnaja1
GO:0003163	sinoatrial node development	2/1687	4/17970	0.0464748	Popdc2/Bves
GO:0003257	positive regulation of transcription from RNA polymerase II promoter involved in myocardial precursor cell differentiation	2/1687	4/17970	0.0464748	Myocd/Grem1
GO:0003339	regulation of mesenchymal to epithelial transition involved in metanephros morphogenesis	2/1687	4/17970	0.0464748	Ctnnb1/Wnt9b
GO:0005981	regulation of glycogen catabolic process	2/1687	4/17970	0.0464748	Ppp1cb/Ppp1r3d
GO:0006196	AMP catabolic process	2/1687	4/17970	0.0464748	Nt5e/Ada
GO:0006824	cobalt ion transport	2/1687	4/17970	0.0464748	Tcn2/Mmgt2
GO:0007056	spindle assembly involved in female meiosis	2/1687	4/17970	0.0464748	Aurka/2700099C18Rik
GO:0007057	spindle assembly involved in female meiosis I	2/1687	4/17970	0.0464748	Aurka/2700099C18Rik
GO:0009233	menaquinone metabolic process	2/1687	4/17970	0.0464748	Cyp4f40/Cyp4f18
GO:0009608	response to symbiont	2/1687	4/17970	0.0464748	Gpx2/Gpx2-ps1
GO:0009609	response to symbiotic bacterium	2/1687	4/17970	0.0464748	Gpx2/Gpx2-ps1
GO:0015691	cadmium ion transport	2/1687	4/17970	0.0464748	Slc30a1/1700034H15Rik
GO:0016081	synaptic vesicle docking	2/1687	4/17970	0.0464748	Rims2/Unc13b
GO:0019323	pentose catabolic process	2/1687	4/17970	0.0464748	Dhdh/Rbks
GO:0031284	positive regulation of guanylate cyclase activity	2/1687	4/17970	0.0464748	Nos1/Nos3
GO:0032799	low-density lipoprotein receptor particle metabolic process	2/1687	4/17970	0.0464748	Abca2/Mylip
GO:0032802	low-density lipoprotein particle receptor catabolic process	2/1687	4/17970	0.0464748	Abca2/Mylip
GO:0032803	regulation of low-density lipoprotein particle receptor catabolic process	2/1687	4/17970	0.0464748	Abca2/Mylip
GO:0032911	negative regulation of transforming growth factor beta1 production	2/1687	4/17970	0.0464748	Cd2ap/Laptm4b
GO:0033292	T-tubule organization	2/1687	4/17970	0.0464748	Lman2l/Fer1l5
GO:0035964	COPI-coated vesicle budding	2/1687	4/17970	0.0464748	Arfgap2/Tmed10-ps
GO:0035977	protein deglycosylation involved in glycoprotein catabolic process	2/1687	4/17970	0.0464748	Edem1/Edem2
GO:0036102	leukotriene B4 metabolic process	2/1687	4/17970	0.0464748	Cyp4f40/Cyp4f18
GO:0036114	medium-chain fatty-acyl-CoA catabolic process	2/1687	4/17970	0.0464748	Acot7/Nudt7
GO:0036166	phenotypic switching	2/1687	4/17970	0.0464748	Fgf9/Myocd
GO:0036438	maintenance of lens transparency	2/1687	4/17970	0.0464748	Aldh1a1/Foxc1
GO:0036507	protein demannosylation	2/1687	4/17970	0.0464748	Edem1/Edem2
GO:0036508	protein alpha-1,2-demannosylation	2/1687	4/17970	0.0464748	Edem1/Edem2
GO:0042321	negative regulation of circadian sleep/wake cycle, sleep	2/1687	4/17970	0.0464748	Ada/Ptger4
GO:0042374	phylloquinone metabolic process	2/1687	4/17970	0.0464748	Cyp4f40/Cyp4f18
GO:0042376	phylloquinone catabolic process	2/1687	4/17970	0.0464748	Cyp4f40/Cyp4f18
GO:0044828	negative regulation by host of viral genome replication	2/1687	4/17970	0.0464748	Zc3h12a/Prkn
GO:0046469	platelet activating factor metabolic process	2/1687	4/17970	0.0464748	Pla2g5/Pla2g4c
GO:0046710	GDP metabolic process	2/1687	4/17970	0.0464748	Entpd4/Entpd4b
GO:0048793	pronephros development	2/1687	4/17970	0.0464748	Hnf1b/Cep290
GO:0060440	trachea formation	2/1687	4/17970	0.0464748	Ctnnb1/Bmp4
GO:0060449	bud elongation involved in lung branching	2/1687	4/17970	0.0464748	Bmp4/Spry2
GO:0060592	mammary gland formation	2/1687	4/17970	0.0464748	Tbx2/Bmp4
GO:0060872	semicircular canal development	2/1687	4/17970	0.0464748	Chd7/Zeb1
GO:0060921	sinoatrial node cell differentiation	2/1687	4/17970	0.0464748	Popdc2/Bves
GO:0060926	cardiac pacemaker cell development	2/1687	4/17970	0.0464748	Popdc2/Bves
GO:0061038	uterus morphogenesis	2/1687	4/17970	0.0464748	Wnt9b/Stra6
GO:0061478	response to platelet aggregation inhibitor	2/1687	4/17970	0.0464748	Reg1/Adcy1
GO:0061550	cranial ganglion development	2/1687	4/17970	0.0464748	Ctnnb1/Nrp2
GO:0070574	cadmium ion transmembrane transport	2/1687	4/17970	0.0464748	Slc30a1/1700034H15Rik
GO:0071421	manganese ion transmembrane transport	2/1687	4/17970	0.0464748	Slc30a10/Tmem165
GO:0072201	negative regulation of mesenchymal cell proliferation	2/1687	4/17970	0.0464748	Wnt5a/Bmp4
GO:0086073	bundle of His cell-Purkinje myocyte adhesion involved in cell communication	2/1687	4/17970	0.0464748	Pkp2/Dsp
GO:0090032	negative regulation of steroid hormone biosynthetic process	2/1687	4/17970	0.0464748	Dkk3/Pde8b
GO:0090154	positive regulation of sphingolipid biosynthetic process	2/1687	4/17970	0.0464748	Smpd3/Ccn1
GO:1900019	regulation of protein kinase C activity	2/1687	4/17970	0.0464748	Wnt5a/Ror2
GO:1900020	positive regulation of protein kinase C activity	2/1687	4/17970	0.0464748	Wnt5a/Ror2
GO:1900034	regulation of cellular response to heat	2/1687	4/17970	0.0464748	Ier5/Mapt
GO:1901491	negative regulation of lymphangiogenesis	2/1687	4/17970	0.0464748	Epha2/Foxc1
GO:1901642	nucleoside transmembrane transport	2/1687	4/17970	0.0464748	Slc28a2/Slc28a2b
GO:1902031	regulation of NADP metabolic process	2/1687	4/17970	0.0464748	Pgam1/Tigar
GO:1902455	negative regulation of stem cell population maintenance	2/1687	4/17970	0.0464748	Wnt9b/Hnf1b
GO:1902730	positive regulation of proteoglycan biosynthetic process	2/1687	4/17970	0.0464748	Ctnnb1/Pxylp1
GO:1904380	endoplasmic reticulum mannose trimming	2/1687	4/17970	0.0464748	Edem1/Edem2
GO:1904382	mannose trimming involved in glycoprotein ERAD pathway	2/1687	4/17970	0.0464748	Edem1/Edem2
GO:2000304	positive regulation of ceramide biosynthetic process	2/1687	4/17970	0.0464748	Smpd3/Ccn1
GO:2000391	positive regulation of neutrophil extravasation	2/1687	4/17970	0.0464748	Pawr/Ptger4
GO:2000674	regulation of type B pancreatic cell apoptotic process	2/1687	4/17970	0.0464748	Pdx1/Wfs1
GO:0014909	smooth muscle cell migration	11/1687	67/17970	0.0465746	Tmsb4x/Parva/Egr1/Gm12854/Fgf9/Myocd/Il18/Rab5a/Postn/Ptger4/Rapgef4
GO:0045069	regulation of viral genome replication	11/1687	67/17970	0.0465746	Ifitm2/Ddx3x/Zc3h12a/Ppia/Ltf/Shfl/Prkn/Morc2a/Isg20/Mavs/Resf1
GO:0001822	kidney development	30/1687	233/17970	0.046984	Wnt5a/Egr1/Itga8/Ctnnb1/Arg2/Lrp4/Bmp4/Lamb2/Cenpf/Dcn/Hpgd/Nup160/Cdkn1c/Wnt9b/Ndufs6b/Smad9/Stra6/Sox8/Hnf1b/Wfs1/Wdpcp/Lgr4/Grem1/Pgf/Glis2/Foxc1/Tmed10-ps/Tgfbr1/Gpr4/Cep290
GO:0007369	gastrulation	18/1687	126/17970	0.0471802	Leo1/Wnt5a/Ctnnb1/Mmp2/Bmp4/Inhba/Atoh8/Nat8/Itgb4/Lamb3/Hnf1b/Lmbrd1/Epha2/Tnfaip3/Col8a1/Foxc1/Megf8/Supt20
GO:0010677	negative regulation of cellular carbohydrate metabolic process	7/1687	36/17970	0.0472221	Mtch2/Gm46840/Ep300/Prkn/Fam3a/Tigar/Pask
GO:0045933	positive regulation of muscle contraction	7/1687	36/17970	0.0472221	Kcnq1/Myocd/Pawr/Edn2/Ada/Gper1/Tbxa2r
GO:0051893	regulation of focal adhesion assembly	7/1687	36/17970	0.0472221	Poldip2/Ppm1f/Arhgap6/Limch1/Wdpcp/Grem1/Col16a1
GO:0090109	regulation of cell-substrate junction assembly	7/1687	36/17970	0.0472221	Poldip2/Ppm1f/Arhgap6/Limch1/Wdpcp/Grem1/Col16a1
GO:1903018	regulation of glycoprotein metabolic process	7/1687	36/17970	0.0472221	Ctnnb1/Pomt2/Abca2/Pomt1/Pawr/Ep300/Pxylp1
GO:1904705	regulation of vascular smooth muscle cell proliferation	7/1687	36/17970	0.0472221	Mmp2/Fgf9/Myocd/Hpgd/Cdkn1b/Nqo2/Gper1
GO:2000736	regulation of stem cell differentiation	7/1687	36/17970	0.0472221	Bmp4/Tcf15/Zfp36l2/Ythdf2/Pwp1/Lbh/Foxc1
GO:0043408	regulation of MAPK cascade	56/1687	477/17970	0.0473348	Wnt5a/Tab1/Ctnnb1/Zc3h12a/Dynlt1c/Ppia/Ccnq/Fgf9/Bmp4/Ccn1/Slc30a10/Bnip2/Pik3cg/Ror2/Map3k21/Avpi1/Gpr55/Unc5cl/Traf3/Map3k7/Ccl8/Mid1/Spry2/Fgfr3/Prkn/Adrb3/Nbr1/Ccl20/Mturn/Ccl9/Map3k13/Pik3r5/Nqo2/Epha2/Cd27/Ccl22/Sh3rf2/Styx/Pak6/Nptn/F2rl1/Map3k20/Atp6ap2/Gper1/Lbh/Rell2/Sirpa/Tlr13/Dstyk/Pik3r6/Spred1/Alox15/Dusp6/Tgfbr1/Dnaja1/Tgfa
GO:0031348	negative regulation of defense response	23/1687	170/17970	0.0473388	Arg2/Zc3h12a/Lpcat3/Gpx2/Tyro3/Pglyrp1/Il22ra2/Wfdc1/Nt5e/Fgl2/Il20rb/Ythdf2/Dcst1/Tnfaip3/Ada/Calcrl/Gper1/Gpx2-ps1/Ptger4/Sirpa/Proc/Trim21/Macir
GO:0033108	mitochondrial respiratory chain complex assembly	14/1687	92/17970	0.0476543	Ndufaf3/Uqcrc1/Ndufab1/Uqcc6/Ndufs5-ps/Lyrm7/Gm30251/Ndufs6b/Samm50/Ndufb9/Ndufa1/Nubpl/Slc25a33/Ndufc1
GO:0051168	nuclear export	16/1687	109/17970	0.0478601	Frat1/Wipf1/Nxf1/Pom121/Riok2/Nup160/Thoc2l/Rita1/Styx/Ctdspl2/Chtop/Egr2/Sarnp/Polr2d/Ltv1/Thoc2
GO:0003012	muscle system process	33/1687	261/17970	0.0480579	Gaa/Smpd3/Kcnq1/Arg2/Zc3h12a/Tbx2/Myocd/Rangrf/Fdps/Gucy1a1/Pawr/Hrc/Ep300/Hspb6/Trim72/Nr4a1/Myl4/Pkp2/Arhgap42/Nos1/Ndufs6b/Edn2/Kcne3/Ada/Calcrl/Gper1/Ptger4/Tnnt3/Tnni2/Dsp/Tbxa2r/Nos3/Tnni1
GO:0060491	regulation of cell projection assembly	19/1687	135/17970	0.0481142	Cyfip1/Cep135/Ppp1r9a/Pld1/Rab5a/Epha2/Wdpcp/Vdac3/Odf2l/Ttbk2/Tbc1d30/F2rl1/Zmynd10/Avil/Abitram/Dock11/Dpysl2/Tgfbr1/Mns1
GO:0070848	response to growth factor	55/1687	468/17970	0.048209	Smpd3/Hspa5/Fgf1/Wnt5a/Tab1/Egr1/Itga8/Ctnnb1/Cyfip1/Wwox/Fgf9/Bmp4/Myocd/Ccn1/Tac1/Dcn/Ror2/Ltbp1/Map3k7/Adgra2/Spry2/Ep300/Hpgd/Fgfr3/Elk1/Nr4a1/Zfp36l2/Smoc2/Nos1/Rgmb/Smad9/Nus1/Epha2/Postn/Ctdspl2/Grem1/Nptn/Pgf/Foxc1/Sort1/Dstyk/Pde3a/Spred1/Grem2/Ppp1r9b/Sh3gl2/Megf8/Dusp6/Tgfbr1/Nos3/Zfyve27/Veph1/Star/Egr3/Zeb1
GO:0044089	positive regulation of cellular component biogenesis	44/1687	364/17970	0.0489282	Smpd3/Poldip2/Cldn3/Cyfip1/Ppm1f/Slain2/Cdh17/Tac1/Riok2/Wdr75/Cep135/Ep300/Cdkn1b/Cep295/Amigo1/Ephb3/Sh3pxd2b/Togaram1/Vstm5/Lrrc4b/Terf1/Limch1/Pde4dip/Mapt/Epha2/Abca3/Ttbk2/F2rl1/Zmynd10/Col16a1/Mapre1/Adnp/Utp15/Avil/Dock11/Wasl/Alox15/Dpysl2/Tgfbr1/Mns1/Synpo2/Unc13b/Actr3/Mecp2
GO:0009144	purine nucleoside triphosphate metabolic process	13/1687	84/17970	0.0490272	Nme6/Dnajc30/Gtpbp1/Prkn/Itpa/COX2/Gm6581/Atp5d/Nme7/Ldhd/Atp5b/Entpd1/Ada
GO:0009611	response to wounding	46/1687	383/17970	0.0491541	Pdx1/Wnt5a/Cldn3/Mmp2/Eppk1/Aurka/Hgfac/Ppia/Hps4/Lamb2/Ccn1/Adm/Arf4/Dcn/Nmnat3/Hps6/Tyro3/Reg3a/Bloc1s6/Cdkn1b/Trim72/Lman2l/Zfp36l2/Smoc2/Itgb4/Wfdc1/Gip/F2rl2/Reg1/Tnfaip3/Entpd1/Postn/Pllp/F2rl1/Fer1l5/Ptger4/Alox15/Proc/Dpysl2/Cpq/Tgfa/Dsp/Tbxa2r/Gpr4/Gp1ba/Timp1
GO:0006066	alcohol metabolic process	30/1687	234/17970	0.0492468	Pcbd2/Sord/Lpcat3/Impa1/Dkk3/Rdh12/Abca2/Ppip5k1/Fdps/Aldh1a1/Dgkq/Slc5a3/Dhcr7/H6pd/Pdxp/Pcbd1/Erlin1/Mtmr2/Nus1/Insig2/Gm31597/Soat2/Gpd1/Lcat/Gper1/Mogat2/Hmgcr/Cyp46a1/Mecp2/Star
GO:0046677	response to antibiotic	30/1687	234/17970	0.0492468	Smpd3/Hspa5/Egr1/Cldn3/Mmp2/Zc3h12a/Aldh1a1/Ppp2ca/Casp8/Pawr/Hpgd/Plekha1/Cdkn1b/Adrb3/Cpt1a/Ddx11/Gnao1/Setd7/Cd27/Tnfaip3/Rnf146/Slc23a2/Ada/Jagn1/Adcy1/Sirpa/Oser1/Ankzf1/Tbxa2r/Star
GO:0006767	water-soluble vitamin metabolic process	6/1687	29/17970	0.0492607	Kmo/Vnn1/Pdxp/Kynu/Clybl/Slc23a2
GO:0030901	midbrain development	6/1687	29/17970	0.0492607	Wnt5a/Ctnnb1/Wnt9b/Uqcrq/Uchl5/Smad9
GO:0032873	negative regulation of stress-activated MAPK cascade	6/1687	29/17970	0.0492607	Ppia/Prkn/Sh3rf2/F2rl1/Sirpa/Dnaja1
GO:0044275	cellular carbohydrate catabolic process	6/1687	29/17970	0.0492607	Pgam1/Gaa/Sord/Ppp1cb/Ppp1r3d/Tigar
GO:0045880	positive regulation of smoothened signaling pathway	6/1687	29/17970	0.0492607	Fgf9/Txndc15/Gorab/Uchl5/Gas8/Tedc1
GO:0070303	negative regulation of stress-activated protein kinase signaling cascade	6/1687	29/17970	0.0492607	Ppia/Prkn/Sh3rf2/F2rl1/Sirpa/Dnaja1
GO:0002313	mature B cell differentiation involved in immune response	5/1687	22/17970	0.0494491	Cdh17/Pou2af1/Tnfaip3/Ada/Dock11
GO:0006356	regulation of transcription by RNA polymerase I	5/1687	22/17970	0.0494491	Phf8/Wdr75/Ddx11/Pwp1/Utp15
GO:0016180	snRNA processing	5/1687	22/17970	0.0494491	Tut1/Exosc4/Ints9/Toe1/Ints7
GO:0016226	iron-sulfur cluster assembly	5/1687	22/17970	0.0494491	Ndor1/Isca2/Nubpl/Nfs1/Nubp2
GO:0031163	metallo-sulfur cluster assembly	5/1687	22/17970	0.0494491	Ndor1/Isca2/Nubpl/Nfs1/Nubp2
GO:0034656	nucleobase-containing small molecule catabolic process	5/1687	22/17970	0.0494491	Nudt1/Entpd4/Entpd4b/Upb1/Ada
GO:0045662	negative regulation of myoblast differentiation	5/1687	22/17970	0.0494491	Bmp4/Cmtm5/Ccl9/Il18/Sox8
GO:0046329	negative regulation of JNK cascade	5/1687	22/17970	0.0494491	Prkn/Sh3rf2/F2rl1/Sirpa/Dnaja1
GO:0048169	regulation of long-term neuronal synaptic plasticity	5/1687	22/17970	0.0494491	Egr1/Syngr1/Syp/Rab5a/Nptn
GO:0062125	regulation of mitochondrial gene expression	5/1687	22/17970	0.0494491	Rmnd1/Malsu1/Chchd10/Mief1/Nsun4
GO:0090162	establishment of epithelial cell polarity	5/1687	22/17970	0.0494491	Wnt5a/Sh3bp1/Lama1/Tcf15/Ophn1
GO:1901797	negative regulation of signal transduction by p53 class mediator	5/1687	22/17970	0.0494491	Rnf34/Prkn/Ell3/Marchf7/Atad5
GO:1902229	regulation of intrinsic apoptotic signaling pathway in response to DNA damage	5/1687	22/17970	0.0494491	Mtch2/Ell3/Marchf7/Usp47/Atad5
GO:0050767	regulation of neurogenesis	68/1687	594/17970	0.0495172	Ywhah/Gdpd5/Fbxo31/Hspa5/Wnt5a/Katna1/Ctnnb1/Dab1/Lrp4/Cyfip1/Nkx6-2/Dynlt1c/Rims2/Bmp4/Bnip2/Ror2/Bmal1/Adgrg1/Hoxb3/Ep300/Chd7/Pcm1/Prkn/Sema6c/Ppp1r9a/Pcp4/Sipa1l1/Nos1/Ell3/Amigo1/Cpne9/Ephb3/Fstl4/Bcl6/Aatk/Draxin/Tmem106b/Per2/Map3k13/Sox8/Mapt/Mylip/Reg1/Ythdf2/Gm46764/Tmem98/Wdr36/Ss18l1/Cul7/Nptn/Slc23a2/Adam10/Adnp/Gper1/Rapgef4/Srcin1/Egr2/Prkch/Avil/Cntn1/Dnmt3b/Dpysl2/Megf8/Zfyve27/C…
GO:0031109	microtubule polymerization or depolymerization	15/1687	101/17970	0.0496893	Slain2/Tubgcp4/Rangrf/Mid1/Cdkn1b/Tubgcp2/Spast/Togaram1/Pde4dip/Mapt/Mzt1/Ttbk2/Mapre1/Stmn2/Mecp2
GO:0022411	cellular component disassembly	34/1687	271/17970	0.0497089	Atg2b/Tmod3/Gfm2/Sh3bp1/Eps8/Noxo1/Shfl/Mid1/Nes/Prkn/Sptbn2/Pdxp/Irgm2/Sh3pxd2b/Spast/Per2/Bnip3l-ps/Tigar/Gm32340/Jmjd4/Usp30/Capza2/H2ac25/Ttbk2/F2rl1/Plekhh2/Fyco1/Gper1/Avil/Exog/Ppp1r9b/Sh3gl2/Dffb/Tgfbr1
GO:0031330	negative regulation of cellular catabolic process	22/1687	162/17970	0.0497803	Poldip2/Pik3cg/Dhx34/Caml/Csnk2a1-ps3/Uchl5/Herc1/Tigar/Mtmr2/Wac/Usp30/Tnfaip3/Marchf7/Styx/Ophn1/Tent5c/Laptm4b/Dapl1/Hnrnpa0/F8a/Trdmt1/Timp1
GO:1903051	negative regulation of proteolysis involved in cellular protein catabolic process	8/1687	44/17970	0.0499315	Caml/Csnk2a1-ps3/Uchl5/Wac/Marchf7/Styx/Ophn1/F8a
GO:0006836	neurotransmitter transport	26/1687	198/17970	0.0501552	Slc28a2/Rims2/Kmo/Maob/Slc30a1/Nr4a1/Prkn/Ppp1r9a/Syp/Sptbn2/Nos1/Per2/1700034H15Rik/Rab5a/Rhot1/Slc44a1/Ada/Gper1/Ptger4/Stx1a/Adcy1/Kcnc3/Gm31336/Cadps2/Sv2a/Unc13b
GO:0009743	response to carbohydrate	24/1687	180/17970	0.0501745	Pdx1/Egr1/Kcnb1/Ppp2ca/Birc5/Gpr27/Slc26a6/Ep300/Cdkn1b/Prkn/Col6a2/Fads1/Zbed3/Gip/Hnf1b/Eif2b3/Sesn2/Calcrl/Adnp/Jagn1/Gper1/Hmgn3/Unc13b/Star
GO:0043648	dicarboxylic acid metabolic process	12/1687	76/17970	0.0501924	Fpgs/Kmo/Nags/Grhpr/Hal/Aldh5a1/Gls2/Acot4/Kynu/Kyat3/Dglucy/Star
GO:0071900	regulation of protein serine/threonine kinase activity	33/1687	262/17970	0.0502256	Ccnd1/Wnt5a/Tab1/Ppia/Ccni/Ltf/Bmp4/Myocd/Pik3cg/Ppp2ca/Ror2/Map3k21/Avpi1/Hexim2/Map3k7/Spry2/Cdkn1b/Slc27a1/Cdkn1c/Irgm2/Map3k13/Pik3r5/Tnfaip3/Ccne2/Sesn2/Map3k20/Pik3r6/Spred1/Dusp6/Tgfbr1/Dnaja1/Tgfa/Synpo2
GO:0040012	regulation of locomotion	78/1687	692/17970	0.0505363	Tmsb4x/Fbxo31/Smpd3/Hspa5/Wdr44/Wnt5a/Egr1/Cldn3/Mmp2/Zc3h12a/Eppk1/Mgat5/Gm12854/Ppm1f/Fgf9/Bmp4/Myocd/Ccn1/Tac1/Dcn/Pik3cg/Duoxa2/Sh3bp1/Mtus1/Lama1/Ror2/Atoh8/Patz1/Adgra2/Pawr/Adgrg1/Spry2/Pitx2/Rin2/Sema6c/Ccl20/Pkp2/Meak7/Smoc2/Il18/Limch1/Edn2/Nus1/Rab5a/Epha2/Atp5b/Cdh13/Sh3rf2/Dock1/Wdpcp/Postn/Grem1/Ttbk2/Ada/Adam10/F2rl1/Pgf/Gper1/Ptger4/Rapgef4/Fut7/Srcin1/Tnfrsf18/Prr5l/Spred1/Chrm1/…
GO:0001823	mesonephros development	11/1687	68/17970	0.0510478	Ctnnb1/Arg2/Bmp4/Wnt9b/Smad9/Sox8/Hnf1b/Lgr4/Grem1/Pgf/Foxc1
GO:1903363	negative regulation of cellular protein catabolic process	9/1687	52/17970	0.0511804	Caml/Csnk2a1-ps3/Uchl5/Wac/Marchf7/Styx/Ophn1/Laptm4b/F8a
GO:0045931	positive regulation of mitotic cell cycle	16/1687	110/17970	0.0513325	Ccnd1/Smpd3/Poldip2/Cdc25a/Ddx3x/Cul4a/Birc5/Dtl/Smoc2/Gm33950/Gm46764/Map3k20/Xrcc3/2700099C18Rik/Tgfa/Mecp2
GO:0001656	metanephros development	10/1687	60/17970	0.0514477	Egr1/Itga8/Ctnnb1/Bmp4/Lamb2/Wnt9b/Sox8/Hnf1b/Lgr4/Grem1
GO:0008593	regulation of Notch signaling pathway	10/1687	60/17970	0.0514477	Gdpd5/Nrarp/Bcl6/Galnt11/Rita1/Ythdf2/Postn/Adam10/Rfng/Cbfa2t2
GO:0014910	regulation of smooth muscle cell migration	10/1687	60/17970	0.0514477	Tmsb4x/Egr1/Gm12854/Fgf9/Myocd/Il18/Rab5a/Postn/Ptger4/Rapgef4
GO:0072347	response to anesthetic	10/1687	60/17970	0.0514477	Hspa5/Kcnq1/Tac1/Nos1/Gnao1/Ada/Abcg2/Dnmt3b/Ppp1r9b/Mecp2
GO:0006611	protein export from nucleus	14/1687	93/17970	0.0514586	Frat1/Wipf1/Nxf1/Riok2/Nup160/Thoc2l/Styx/Ctdspl2/Chtop/Egr2/Sarnp/Polr2d/Ltv1/Thoc2
GO:0010634	positive regulation of epithelial cell migration	14/1687	93/17970	0.0514586	Wnt5a/Zc3h12a/Ppm1f/Bmp4/Tac1/Pik3cg/Atoh8/Adgra2/Rin2/Smoc2/Nus1/Atp5b/Dock1/Nos3
GO:0051783	regulation of nuclear division	20/1687	145/17970	0.0518663	Smpd3/Nme6/Wnt5a/Bmp4/Mad1l1/Riok2/Birc5/Zwint/Cdkn1b/Cdkn1c/Gm33950/Pdxp/Tnks/Spdl1/Cul7/Xrcc3/2700099C18Rik/Pde3a/Tgfa/Sgo2a
GO:0097191	extrinsic apoptotic signaling pathway	21/1687	154/17970	0.0523404	Rnf34/Ddx3x/Wwox/Bmp4/Inhba/Pdia3/Casp8/Fgfr3/Il18/Sgk3/Eya2/Faim2/Cd27/Tnfaip3/Gm20604/Casp8ap2/Tnfrsf10b/Clca3a1/Gper1/Sort1/Tgfbr1
GO:0043410	positive regulation of MAPK cascade	42/1687	347/17970	0.0524052	Wnt5a/Tab1/Ctnnb1/Zc3h12a/Ppia/Ccnq/Fgf9/Bmp4/Slc30a10/Bnip2/Pik3cg/Ror2/Map3k21/Avpi1/Gpr55/Unc5cl/Traf3/Map3k7/Ccl8/Mid1/Spry2/Fgfr3/Adrb3/Ccl20/Mturn/Ccl9/Map3k13/Pik3r5/Nqo2/Cd27/Ccl22/Sh3rf2/Nptn/F2rl1/Map3k20/Gper1/Rell2/Dstyk/Pik3r6/Alox15/Tgfbr1/Tgfa
GO:0046467	membrane lipid biosynthetic process	15/1687	102/17970	0.0534172	Elovl6/Smpd3/Hacd2/Pgap3/Pgap2/Pigv/Degs1/Ccn1/Abca2/Pyurf/Pigg/Pigl/Cers6/Elovl5/B4galnt1
GO:0050829	defense response to Gram-negative bacterium	15/1687	102/17970	0.0534172	Lypd8/Ltf/Tac1/Adm/Lyz1/Npy/H2bc12/H2bc21/Irgm2/Defa37/F2rl1/Defa23/Casp1/Defa35/Defa34
GO:0051147	regulation of muscle cell differentiation	15/1687	102/17970	0.0534172	Tmsb4x/Fgf9/Bmp4/Myocd/Fdps/Cth/Ccl8/Plpp7/Ep300/Trim72/Cd53/Grem1/Gper1/Mecp2/Zeb1
GO:0019730	antimicrobial humoral response	18/1687	128/17970	0.0536673	Ltf/Tac1/Adm/Reg3a/Npy/H2bc12/Ccl20/Pglyrp1/H2bc21/Wfdc2/Reg1/Defa37/Ccl22/Pgc/Defa23/Defa35/Ccl28/Defa34
GO:0051302	regulation of cell division	18/1687	128/17970	0.0536673	Fgf1/Poldip2/Aurka/Fgf9/Prc1/Wnt9b/Pdxp/Myo19/Gm37804/Spast/Gm2788/Pgf/Lbh/Klhl13/Klhl9/Tgfa/Rbl2/Kif20a
GO:0030857	negative regulation of epithelial cell differentiation	7/1687	37/17970	0.0537112	Nkx6-3/Ctnnb1/Spry2/Reg3a/Spred1/Tgfbr1/Zeb1
GO:0150116	regulation of cell-substrate junction organization	7/1687	37/17970	0.0537112	Poldip2/Ppm1f/Arhgap6/Limch1/Wdpcp/Grem1/Col16a1
GO:1903202	negative regulation of oxidative stress-induced cell death	7/1687	37/17970	0.0537112	Ctnnb1/Ppia/Vnn1/Prkn/Meak7/Rnf146/Ncoa7
GO:0007219	Notch signaling pathway	19/1687	137/17970	0.054449	Gdpd5/Krt19/Tbx2/Nrarp/Cdkn1b/Bcl6/Galnt11/Rita1/Dtx4/Dtx3/Hnf1b/Ythdf2/Postn/Jag1/Adam10/Foxc1/Cntn1/Rfng/Cbfa2t2
GO:0030100	regulation of endocytosis	19/1687	137/17970	0.054449	Snph/Wnt5a/Cd177/Abca2/Cd2ap/Dgkq/Mtmr2/Sgip1/Rab5a/Cdh13/Ubqln2/Ophn1/Grem1/F2rl1/Rspo1/Sh3gl2/Alox15/Pacsin3/Ankrd13b
GO:0018210	peptidyl-threonine modification	12/1687	77/17970	0.0545989	Wnt5a/Galnt1/Dgkq/Map3k7/Spry2/Csnk2a1-ps3/Irgm2/Galnt11/Tnks/Cdc42bpa/Spred1/Tgfbr1
GO:0008217	regulation of blood pressure	20/1687	146/17970	0.0550219	Kcnq1/Tac1/Adm/Qrfp/Gucy1a1/Klk1/Ddah1/Npy/Adrb3/Arhgap42/Nos1/Edn2/Postn/Cyp4f18/Erap1/F2rl1/Atp6ap2/Tbxa2r/Nos3/Mecp2
GO:0046683	response to organophosphorus	14/1687	94/17970	0.0554672	Hspa5/Kcnq1/Pik3cg/Dgkq/Slc26a6/P2rx6/Pdxp/Pla2g5/Slc26a3/Aqp8/Gpd1/Casp1/Pde3a/Star
GO:1901657	glycosyl compound metabolic process	14/1687	94/17970	0.0554672	Nudt1/Nme6/Macrod1/Entpd4/Gtpbp1/Lcmt2/Entpd4b/Nt5e/Tyw1/Nme7/Upb1/Dck/Ada/Abcg2
GO:0051963	regulation of synapse assembly	11/1687	69/17970	0.0558013	Wnt5a/Ppp1r9a/Sipa1l1/Amigo1/Ephb3/Lrfn4/Vstm5/Lrrc4b/Setd5/Adnp/Slitrk4
GO:0002066	columnar/cuboidal epithelial cell development	8/1687	45/17970	0.0559407	Wnt5a/Kcnq1/Bmp4/Bmal1/Yipf6/Sec24b/Tigar/Wdpcp
GO:0032204	regulation of telomere maintenance	8/1687	45/17970	0.0559407	Ctc1/Ctnnb1/Terf1/Cct4/Tnks/Dcp2/Pif1/Terf2ip
GO:0006349	regulation of gene expression by genetic imprinting	4/1687	16/17970	0.0563828	Kcnq1/Arid4a/Dnmt3b/Mecp2
GO:0006904	vesicle docking involved in exocytosis	4/1687	16/17970	0.0563828	Rims2/Kcnb1/Bloc1s6/Unc13b
GO:0031167	rRNA methylation	4/1687	16/17970	0.0563828	Zcchc4/Mrm2/Tfb1m/Nsun4
GO:0032930	positive regulation of superoxide anion generation	4/1687	16/17970	0.0563828	Cd177/Il18/Mapt/F2rl1
GO:0045822	negative regulation of heart contraction	4/1687	16/17970	0.0563828	Zc3h12a/Tac1/Nos1/Kcne3
GO:0098901	regulation of cardiac muscle cell action potential	4/1687	16/17970	0.0563828	Rangrf/Pkp2/Kcne3/Dsp
GO:1900746	regulation of vascular endothelial growth factor signaling pathway	4/1687	16/17970	0.0563828	Dcn/Adgra2/Spry2/Smoc2
GO:1903204	negative regulation of oxidative stress-induced neuron death	4/1687	16/17970	0.0563828	Ctnnb1/Prkn/Meak7/Ncoa7
GO:1904292	regulation of ERAD pathway	4/1687	16/17970	0.0563828	Edem1/Ubqln2/Edem2/Rnft1
GO:2000737	negative regulation of stem cell differentiation	4/1687	16/17970	0.0563828	Tcf15/Zfp36l2/Ythdf2/Lbh
GO:0001738	morphogenesis of a polarized epithelium	10/1687	61/17970	0.0565831	Wnt5a/Sh3bp1/Lama1/Ror2/Jhy/Tcf15/Wnt9b/Sapcd2/Sec24b/Ophn1
GO:0035023	regulation of Rho protein signal transduction	10/1687	61/17970	0.0565831	Stard8/Gpr55/Gpr20/Adgrg1/Arhgap42/Bcl6/F2rl2/Ophn1/F2rl1/Gpr4
GO:0036473	cell death in response to oxidative stress	10/1687	61/17970	0.0565831	Ctnnb1/Ppia/Pawr/Vnn1/Prkn/Melk/Meak7/Mapt/Rnf146/Ncoa7
GO:0061640	cytoskeleton-dependent cytokinesis	10/1687	61/17970	0.0565831	Poldip2/Myh10/Snx18/Cenpa/Birc5/Spast/Cep55/Cul7/Septin4/Kif20a
GO:0110110	positive regulation of animal organ morphogenesis	9/1687	53/17970	0.0567347	Wnt5a/Ctnnb1/Bmp4/Il18/Sox8/Tnfaip3/Lgr4/Grem1/Tgfbr1
GO:1905897	regulation of response to endoplasmic reticulum stress	9/1687	53/17970	0.0567347	Hspa5/Edem1/Pdx1/Lpcat3/Prkn/Wfs1/Ubqln2/Edem2/Rnft1
GO:0005978	glycogen biosynthetic process	6/1687	30/17970	0.0568782	Gyg/Ppp1cb/Per2/Ppp1r3d/Pask/Epm2aip1
GO:0009250	glucan biosynthetic process	6/1687	30/17970	0.0568782	Gyg/Ppp1cb/Per2/Ppp1r3d/Pask/Epm2aip1
GO:0040001	establishment of mitotic spindle localization	6/1687	30/17970	0.0568782	Dynlt1c/Cenpa/Spry2/Sapcd2/Spdl1/2700099C18Rik
GO:0046856	phosphatidylinositol dephosphorylation	6/1687	30/17970	0.0568782	Inpp5j/Mtmr7/Mtmr2/Pip4p2/Sacm1l/Fig4
GO:0007568	aging	29/1687	228/17970	0.0570208	Hmga1b/Nudt1/Pdx1/Ctc1/Arg2/Mmp2/Tbx2/Slc30a10/Kmo/Adm/Dcn/Bmal1/Pawr/Igfbp2/Adrb3/Fads1/Cdkn1c/Gm33950/Ndufs6b/Bcl6/Smc6/Kynu/Gnao1/Ada/Abcg2/Rad54b/Ppp1r9b/Tfcp2l1/Timp1
GO:1901214	regulation of neuron death	29/1687	228/17970	0.0570208	Wnt5a/Egr1/Ctnnb1/Kcnb1/Tac1/Slc30a10/Kmo/Birc5/Casp8/Pawr/Tyro3/Nes/Elk1/Prkn/Meak7/Pcp4/Nos1/Draxin/Il18/Tigar/Mapt/Nqo2/Wfs1/Faim2/Slc23a2/Adnp/Ncoa7/Mecp2/Star
GO:0061138	morphogenesis of a branching epithelium	18/1687	129/17970	0.0571348	Wnt5a/Ctnnb1/Bmp4/Fkbpl/Adm/Nrarp/Lama1/Spry2/Pitx2/Wnt9b/Sox8/Hnf1b/Mgp/Epha2/Lgr4/Grem1/Pgf/Btbd7
GO:0061061	muscle structure development	51/1687	435/17970	0.0572652	Tmsb4x/Krt19/Wnt5a/Egr1/Itga8/Ctnnb1/Tbx2/Fgf9/Bmp4/Myocd/Bnip2/Fdps/Adm/Cmtm5/Cenpf/Dcn/Bmal1/Frg1/Cth/Ccl8/Plpp7/Ep300/Chd7/Pitx2/Tcf15/Trim72/Nr4a1/Lman2l/Ccl9/Pkp2/Popdc2/Il18/Stra6/Btbd1/Sox8/Cd53/Grem1/Fer1l5/Gper1/Cd164/Foxc1/Casp1/Sort1/Egr2/Tgfbr1/Bves/Dsp/Tnni1/Mecp2/Syna/Zeb1
GO:0045785	positive regulation of cell adhesion	36/1687	293/17970	0.0572842	Wnt5a/Poldip2/Ppm1f/Ccn1/Kifap3/Pawr/Adgrg1/Igfbp2/Vnn1/Rin2/Ecm2/Spock2/Smoc2/Bcl6/Il18/Cd27/Cdh13/Ccdc80/Dock1/Col8a1/Btnl2/Ada/Col16a1/Cd83/Rell2/Ptger4/Fut7/Sirpa/Tnfrsf18/Icos/Pik3r6/Alox15/Sash3/Ccl28/Olfm4/Egr3
GO:0006979	response to oxidative stress	38/1687	312/17970	0.0578879	Smpd3/Ctnnb1/Mmp2/Zc3h12a/Ppia/Bmp4/Sesn3/Gpx2/Aldh1a1/Mgst1/Bmal1/Pawr/Vnn1/Gsr/Plekha1/Prkn/Melk/Meak7/Ercc6/Adprs/Mapt/Gnao1/Tnfaip3/Brf2/Sesn2/Cat/Rnf146/Rad52/Slc23a2/Ada/Ncoa7/Gpx2-ps1/Sirpa/Prr5l/Oser1/Ankzf1/Nos3/Star
GO:0045787	positive regulation of cell cycle	27/1687	210/17970	0.0578903	Ccnd1/Gdpd5/Smpd3/Wnt5a/Poldip2/Cdc25a/Ddx3x/Cul4a/Birc5/Dtl/Ccpg1/Cdkn1b/Cep295/Smoc2/Gm33950/Spast/Ddx11/Gm2788/Gm46764/Map3k20/Xrcc3/2700099C18Rik/Atad5/Tgfa/Trim21/Sgo2a/Mecp2
GO:0035821	modification of morphology or physiology of other organism	20/1687	147/17970	0.0583104	Zc3h12a/Ltf/Tac1/Ep300/Reg3a/Prkn/H2bc12/Ccl20/Pglyrp1/H2bc21/Irgm2/Rab9/Reg1/Defa37/Ccl22/F2rl1/Defa23/Defa35/Ccl28/Defa34
GO:0002026	regulation of the force of heart contraction	5/1687	23/17970	0.0584828	Gaa/Adm/Myl4/Nos1/Nos3
GO:0007031	peroxisome organization	5/1687	23/17970	0.0584828	Lonp2/Pex11b/Mavs/Dnm1l/Pex1
GO:0009147	pyrimidine nucleoside triphosphate metabolic process	5/1687	23/17970	0.0584828	Uck2/Nme6/Entpd4/Entpd4b/Nme7
GO:0021680	cerebellar Purkinje cell layer development	5/1687	23/17970	0.0584828	Hspa5/Sptbn2/Uqcrq/Herc1/Faim2
GO:0048566	embryonic digestive tract development	5/1687	23/17970	0.0584828	Fgf9/Pitx2/Stra6/Hnf1b/Ada
GO:0048596	embryonic camera-type eye morphogenesis	5/1687	23/17970	0.0584828	Tbx2/Aldh1a1/Stra6/Snora73b/Zeb1
GO:0060325	face morphogenesis	5/1687	23/17970	0.0584828	Mmp2/Crispld2/Ep300/Plekha1/Stra6
GO:0071480	cellular response to gamma radiation	5/1687	23/17970	0.0584828	Hspa5/Egr1/Rnf4/Elk1/Map3k20
GO:0090181	regulation of cholesterol metabolic process	5/1687	23/17970	0.0584828	Lpcat3/Fdps/Dgkq/Dhcr7/Erlin1
GO:0006839	mitochondrial transport	21/1687	156/17970	0.0586159	Mtch2/Mpc1/Zfp13/Timm9/Dnajc30/Chchd10/Timm17b/Gm13570/Gm30251/Prkn/Samm50/Atp5d/Bnip3l-ps/Eya2/Atp5b/Rhot1/Gm20604/Slc25a33/Slc25a4/Hspa1l/Sfxn3
GO:0015931	nucleobase-containing compound transport	21/1687	156/17970	0.0586159	Slc28a2/Nxf1/Pom121/Riok2/Gjb1/Igf2bp3/Nup160/Thoc2l/Mapt/Tnks/Slc25a33/Slc35a2/Chtop/Sarnp/Polr2d/Slc25a4/Slc28a2b/Hnrnpa3/Ltv1/Thoc2/Sidt1
GO:0071560	cellular response to transforming growth factor beta stimulus	21/1687	156/17970	0.0586159	Hspa5/Wnt5a/Tab1/Itga8/Wwox/Myocd/Ltbp1/Map3k7/Spry2/Ep300/Hpgd/Zfp36l2/Smad9/Postn/Pde3a/Spred1/Tgfbr1/Nos3/Veph1/Star/Zeb1
GO:0055114	oxidation-reduction process	44/1687	369/17970	0.0586693	Cpt2/Mtch2/Pgam1/Gaa/Cox7a1/Coa6/Tysnd1/Echdc1/Ndor1/Sdha/Gyg/Eno1b/Lonp2/Uqcrc1/Lyrm7/Ino80dos/Hadhb/COX2/Ndufs6b/H6pd/Uqcrq/Ppp1cb/Ndufb9/Cpt1a/Per2/Atp5d/Ehhadh/Ppp1r3d/Wdr93/Tigar/Etfrf1/Sesn2/Ndufv3/Cox8b/Gpd1/Nucb2/Gm6293/Uqcrb/Phkb/Pask/Cox4i1/Alox15/Cox5b/Epm2aip1
GO:0006974	cellular response to DNA damage stimulus	72/1687	639/17970	0.0586711	Ccnd1/Mtch2/Fbxo31/Nudt1/Poldip2/Batf/Ctc1/Zc3h12a/Macrod1/Cul4a/Rad51ap1/Mgme1/Usp1/Smyd2/Exd2/Dtl/Msh5/Rec8/Ep300/Morc2a/Gm33950/Ell3/Ticrr/Chaf1b/Ier3/Bcl6/Tdp1/Fancc/Smc6/Uchl5/Ercc6/Nhej1/Ddx11/Tigar/Adprs/Eya2/Wac/Exo5/Shprh/Mapt/Epha2/Setd7/Npas2/H2ac25/Gm20604/Marchf7/Sesn2/Psme4/Nthl1/Rad23a/Rad52/Mcm8/Cdkn3/Recql/Map3k20/Gm11690/Atm/Usp47/Fbxo45/Rad54b/Hmces/Xrcc3/Polq/Spred1/Atad5/Ikbk…
GO:1903530	regulation of secretion by cell	51/1687	436/17970	0.0591643	Smpd3/Pdx1/Rph3al/Kcnq1/Myh10/Cd177/Rims2/Ppia/Kcnb1/Inhba/Tac1/Exph5/Kmo/Cd2ap/Maob/Birc5/Bmal1/Gpr27/Ep300/Chd7/Slc30a1/Prkn/Ppp1r9a/Syp/Pcp4/Nos1/Gip/Cpt1a/Rab9/Per2/1700034H15Rik/Edn2/Rab5a/Rhot1/Entpd1/Ica1/Nucb2/F2rl1/Jagn1/Gper1/Ptger4/Rapgef4/Stx1a/Adcy1/Septin4/Pask/Kcnc3/Gm31336/Tmed10-ps/Hmgn3/Unc13b
GO:0000956	nuclear-transcribed mRNA catabolic process	12/1687	78/17970	0.0592585	Zc3h12a/Dhx34/Skic3/Exosc4/Dcps/Zfp36l2/Patl1/Nbdy/Parn/Pnrc2/Polr2d/Dcp2
GO:0003158	endothelium development	12/1687	78/17970	0.0592585	Cldn3/Ctnnb1/Bmp4/Atoh8/Col15a1/Cul7/F2rl1/Akap11/Gja4/Proc/Tgfbr1/Zeb1
GO:0019731	antibacterial humoral response	12/1687	78/17970	0.0592585	Ltf/Tac1/Adm/Npy/H2bc12/H2bc21/Wfdc2/Defa37/Pgc/Defa23/Defa35/Defa34
GO:0031047	gene silencing by RNA	12/1687	78/17970	0.0592585	Zc3h12a/Wtip/Bmp4/Myocd/Mrpl44/Pus10/Ago4/Prkra/Bcdin3d/Ago1/Exd1/Mecp2
GO:0045995	regulation of embryonic development	14/1687	95/17970	0.0596839	Hspa5/Wnt5a/Ctnnb1/Tbx2/Bmp4/Rbm19/Nrarp/Lama1/Zbed3/Gorab/Sec24b/Tnfaip3/Wdpcp/Cdk20
GO:0030335	positive regulation of cell migration	45/1687	379/17970	0.0597125	Tmsb4x/Fbxo31/Hspa5/Wnt5a/Egr1/Cldn3/Mmp2/Zc3h12a/Mgat5/Gm12854/Ppm1f/Fgf9/Bmp4/Ccn1/Tac1/Pik3cg/Ror2/Atoh8/Adgra2/Pawr/Spry2/Rin2/Sema6c/Ccl20/Smoc2/Il18/Edn2/Nus1/Rab5a/Atp5b/Cdh13/Sh3rf2/Dock1/Postn/Adam10/F2rl1/Pgf/Gper1/Ptger4/Rapgef4/Fut7/Tnfrsf18/Tgfbr1/Synpo2/Nos3
GO:0003184	pulmonary valve morphogenesis	3/1687	10/17970	0.0599976	Bmp4/Stra6/Nos3
GO:0008300	isoprenoid catabolic process	3/1687	10/17970	0.0599976	Amacr/Crabp1/Gm32342
GO:0010968	regulation of microtubule nucleation	3/1687	10/17970	0.0599976	Rangrf/Pde4dip/Mecp2
GO:0017014	protein nitrosylation	3/1687	10/17970	0.0599976	Ddah1/Nos1/Ncoa7
GO:0021952	central nervous system projection neuron axonogenesis	3/1687	10/17970	0.0599976	Ephb3/Draxin/Fbxo45
GO:0030656	regulation of vitamin metabolic process	3/1687	10/17970	0.0599976	Cd320/Prmt3/Clybl
GO:0034309	primary alcohol biosynthetic process	3/1687	10/17970	0.0599976	Dkk3/Dgkq/H6pd
GO:0042448	progesterone metabolic process	3/1687	10/17970	0.0599976	Egr1/Dgkq/Cyp46a1
GO:0042754	negative regulation of circadian rhythm	3/1687	10/17970	0.0599976	Per2/Ada/Ptger4
GO:0044793	negative regulation by host of viral process	3/1687	10/17970	0.0599976	Zc3h12a/Ltf/Prkn
GO:0045760	positive regulation of action potential	3/1687	10/17970	0.0599976	Tac1/Pawr/Rapgef4
GO:0046341	CDP-diacylglycerol metabolic process	3/1687	10/17970	0.0599976	Agpat4/Lclat1/Agpat5
GO:0048339	paraxial mesoderm development	3/1687	10/17970	0.0599976	Wnt5a/Tcf15/Foxc1
GO:0070189	kynurenine metabolic process	3/1687	10/17970	0.0599976	Kmo/Kynu/Kyat3
GO:0071871	response to epinephrine	3/1687	10/17970	0.0599976	Kcnq1/Nos1/Star
GO:0071872	cellular response to epinephrine stimulus	3/1687	10/17970	0.0599976	Kcnq1/Nos1/Star
GO:0072176	nephric duct development	3/1687	10/17970	0.0599976	Bmp4/Wnt9b/Hnf1b
GO:0090343	positive regulation of cell aging	3/1687	10/17970	0.0599976	Hmga1b/Arg2/Pawr
GO:0099150	regulation of postsynaptic specialization assembly	3/1687	10/17970	0.0599976	Sipa1l1/Lrfn4/Lrrc4b
GO:0099558	maintenance of synapse structure	3/1687	10/17970	0.0599976	Chchd10/Ophn1/Gphn
GO:0150052	regulation of postsynapse assembly	3/1687	10/17970	0.0599976	Sipa1l1/Lrfn4/Lrrc4b
GO:1902548	negative regulation of cellular response to vascular endothelial growth factor stimulus	3/1687	10/17970	0.0599976	Dcn/Adgra2/Spry2
GO:1902916	positive regulation of protein polyubiquitination	3/1687	10/17970	0.0599976	Ddx3x/Prkn/Marchf7
GO:1903299	regulation of hexokinase activity	3/1687	10/17970	0.0599976	Gm46840/Prkn/Tigar
GO:1905874	regulation of postsynaptic density organization	3/1687	10/17970	0.0599976	Sipa1l1/Lrfn4/Lrrc4b
GO:0019932	second-messenger-mediated signaling	38/1687	313/17970	0.060165	Pdx1/Tmbim4/Rims2/Camta1/Adm/Gucy1a1/Dgkq/Hrc/Adgrg1/Adrb3/Ppp1r9a/Ccl20/Ptger2/Nos1/Irgm2/Gip/Stimate/Ppp3cb/Mapt/Edn2/Cdh13/S1pr4/Cxcl11/Ada/Cap2/Nucb2/Calcrl/Adnp/Gper1/Ptger4/Rapgef4/Adcy1/Pde3a/Adgre1/Ppp1r9b/Tbxa2r/Nos3/Gpr4
GO:0001933	negative regulation of protein phosphorylation	35/1687	285/17970	0.0604741	Zc3h12a/Dynlt1c/Dnajc10/Ppia/Ppm1f/Bmp4/Myocd/Ppp2ca/Hexim2/Dgkq/Spry2/Cdkn1b/Prkn/Cdkn1c/Zbed3/Pcp4/Nos1/Mvp/Il18/Sh3rf2/Tnfaip3/Grem1/F2rl1/Pwp1/Gper1/Sirpa/Prr5l/Spred1/Sh3gl2/Ocln/Dusp6/Dnaja1/Ibtk/Cblb/Terf2ip
GO:0032970	regulation of actin filament-based process	35/1687	285/17970	0.0604741	Tmsb4x/Cyfip1/Tmod3/Ppm1f/Tac1/Rangrf/Cd2ap/Sh3bp1/Eps8/Ep300/Prkn/Ppp1r9a/Pkp2/Sptbn2/Nos1/Gm52861/Pdxp/Sh3pxd2b/Arhgap6/Limch1/Capza2/Kcne3/F2rl1/Plekhh2/Ptger4/Avil/Abitram/Wasl/Alox15/Gm40363/Gm53330/Tgfbr1/Dsp/Synpo2/Actr3
GO:0021695	cerebellar cortex development	7/1687	38/17970	0.0607307	Hspa5/Sptbn2/Uqcrq/Herc1/Faim2/Ophn1/Ttbk2
GO:0031018	endocrine pancreas development	7/1687	38/17970	0.0607307	Pdx1/Wnt5a/Nkx6-2/Bmp4/Bmal1/Gip/Hnf1b
GO:0061077	chaperone-mediated protein folding	7/1687	38/17970	0.0607307	Hspa5/Fkbp11/Hspb6/Crtap/Fkbp2/Sgtb/Hspa1l
GO:1900408	negative regulation of cellular response to oxidative stress	7/1687	38/17970	0.0607307	Ctnnb1/Ppia/Vnn1/Prkn/Meak7/Rnf146/Ncoa7
GO:2000027	regulation of animal organ morphogenesis	18/1687	130/17970	0.0607551	Wnt5a/Ctnnb1/Tbx2/Bmp4/Ror2/Jhy/Wnt9b/Sapcd2/Sec24b/Il18/Sox8/Hnf1b/Tnfaip3/Lgr4/Grem1/Foxc1/Tgfbr1/Btbd7
GO:0010595	positive regulation of endothelial cell migration	11/1687	70/17970	0.0608399	Wnt5a/Zc3h12a/Bmp4/Pik3cg/Atoh8/Adgra2/Rin2/Smoc2/Nus1/Atp5b/Nos3
GO:0045446	endothelial cell differentiation	11/1687	70/17970	0.0608399	Cldn3/Ctnnb1/Bmp4/Atoh8/Col15a1/Cul7/F2rl1/Akap11/Proc/Tgfbr1/Zeb1
GO:0043065	positive regulation of apoptotic process	51/1687	437/17970	0.0611093	Mtch2/Wnt5a/Egr1/Ctnnb1/Ddx3x/Mmp2/Zc3h12a/Wwox/Ppm1f/Degs1/Bmp4/Ccn1/Inhba/Zfp13/Adm/Aldh1a1/Ppp2ca/Chchd10/Pdia3/Casp8/Pawr/Hpgd/Nr4a1/Prkn/Melk/Klf11/Gm8283/Bcl6/Bnip3l-ps/Il18/Tigar/Nqo2/Zfp346/Gm20604/Syce3/Stk17b/Casp8ap2/Adam10/Map3k20/Tnfrsf10b/Gper1/Septin4/Casp1/Sort1/Gramd4/C6/Dusp6/Tgfbr1/Dnaja1/Unc13b/Nos3
GO:0051962	positive regulation of nervous system development	47/1687	399/17970	0.0616738	Gdpd5/Fbxo31/Hspa5/Wnt5a/Ctnnb1/Dab1/Cyfip1/Nkx6-2/Dynlt1c/Rims2/Bmp4/Bnip2/Ror2/Ep300/Prkn/Ppp1r9a/Pcp4/Ell3/Amigo1/Cpne9/Ephb3/Gorab/Bcl6/Tmem106b/Vstm5/Map3k13/Lrrc4b/Sox8/Mapt/Reg1/Ss18l1/Cul7/Nptn/Slc23a2/Adnp/Gper1/Egr2/Prkch/Avil/Cntn1/Dnmt3b/Megf8/Zfyve27/Cbfa2t2/Mecp2/Star/Zeb1
GO:0042327	positive regulation of phosphorylation	82/1687	739/17970	0.0616973	Ccnd1/Wnt5a/Tab1/Egr1/Cldn3/Ctnnb1/Ddx3x/Dab1/Lrp4/Zc3h12a/Ppia/Ccnq/Ltf/Fgf9/Bmp4/Ccn1/Inhba/Slc30a10/Bnip2/Pik3cg/Ppp2ca/Ror2/Map3k21/Avpi1/Gpr55/Bmp3/Dgkq/Unc5cl/Traf3/Map3k7/Ccl8/Tyro3/Mid1/Spry2/Ep300/Fgfr3/Cdkn1b/Slc27a1/Adrb3/Ppp1r9a/Ccl20/Mturn/Ccl9/Prlr/Nos1/Ephb3/Irgm2/Ercc6/Il18/Map3k13/Tigar/Limch1/Pik3r5/Nqo2/Epha2/Cd27/Ccl22/Sh3rf2/Mavs/Pak6/Grem1/Nptn/Gpd1/F2rl1/Pgf/Akap11/Map3k20/…
GO:0045333	cellular respiration	20/1687	148/17970	0.0617337	Mtch2/Cox7a1/Coa6/Sdha/Uqcrc1/Lyrm7/Ino80dos/COX2/Ndufs6b/Uqcrq/Ndufb9/Atp5d/Etfrf1/Ndufv3/Cox8b/Gpd1/Gm6293/Uqcrb/Cox4i1/Cox5b
GO:0048608	reproductive structure development	43/1687	361/17970	0.0618526	Krt19/Nudt1/Hspa5/Wnt5a/Nasp/Ctnnb1/Mmp2/Fgf9/Bmp4/Myocd/Ccn1/Inhba/Adm/Dcn/Ror2/Gjb1/Patz1/Tyro3/Adgrg1/Rec8/Ccdc134/Chd7/Pitx2/Plekha1/Cdkn1b/Arid4a/Cdkn1c/Prlr/Wnt9b/Stra6/Sox8/Hnf1b/Edn2/Gm2788/Lgr4/Cul7/Ada/Ptger4/Foxc1/Tgfbr1/Nos3/Syna/Star
GO:0009746	response to hexose	21/1687	157/17970	0.0619437	Pdx1/Egr1/Kcnb1/Ppp2ca/Birc5/Gpr27/Slc26a6/Ep300/Cdkn1b/Prkn/Col6a2/Zbed3/Gip/Hnf1b/Eif2b3/Sesn2/Jagn1/Gper1/Hmgn3/Unc13b/Star
GO:0090068	positive regulation of cell cycle process	21/1687	157/17970	0.0619437	Ccnd1/Smpd3/Wnt5a/Poldip2/Cdc25a/Ddx3x/Cul4a/Birc5/Dtl/Cep295/Gm33950/Spast/Ddx11/Gm2788/Map3k20/Xrcc3/2700099C18Rik/Atad5/Tgfa/Sgo2a/Mecp2
GO:0051403	stress-activated MAPK cascade	22/1687	166/17970	0.0620031	Wnt5a/Zc3h12a/Ppia/Ror2/Map3k21/Unc5cl/Traf3/Map3k7/Mid1/Prkn/Nbr1/Mturn/Ercc6/Map3k13/Cd27/Sh3rf2/F2rl1/Map3k20/Rell2/Ptger4/Sirpa/Dnaja1
GO:0002720	positive regulation of cytokine production involved in immune response	8/1687	46/17970	0.0623902	Wnt5a/Hk1/Map3k7/Dennd1b/Il18/Mavs/F2rl1/Sash3
GO:0050854	regulation of antigen receptor-mediated signaling pathway	8/1687	46/17970	0.0623902	Slc30a7/Pawr/Btnl2/Ada/Prkch/Ikbkg/Cmtm3/Cblb
GO:0051985	negative regulation of chromosome segregation	8/1687	46/17970	0.0623902	Mad1l1/Birc5/Zwint/Wapl/Tnks/Spdl1/Xrcc3/2700099C18Rik
GO:0006942	regulation of striated muscle contraction	9/1687	54/17970	0.0626638	Kcnq1/Arg2/Zc3h12a/Rangrf/Nr4a1/Pkp2/Kcne3/Tnnt3/Dsp
GO:0030301	cholesterol transport	9/1687	54/17970	0.0626638	Lpcat3/Abca2/Stard5/Nus1/Abca3/Abca5/Soat2/Lcat/Star
GO:0016042	lipid catabolic process	32/1687	258/17970	0.0629632	Cpt2/Ywhah/Smpd3/Cyp4f40/Ces1e/Fmc1/Tysnd1/Echdc1/Pik3cg/Lonp2/Plcd1/Nudt7/Hpgd/Plcb4/Plcd3/Hadhb/Cpt1a/Pla2g5/Ehhadh/Pld1/Amacr/Pcca/Sesn2/Cyp4f18/Crabp1/Mgst2/Lpin1/Acot2/Pafah2/Cyp46a1/Gm32342/Pla2g4c
GO:0051656	establishment of organelle localization	31/1687	249/17970	0.0637554	Ctnnb1/Dynlt1c/Cenpa/Riok2/Milr1/Cenpf/Birc5/Spry2/Bloc1s6/Pcm1/Zbed3/Myo19/Sapcd2/Arfgap2/Spast/Mreg/Terf1/Mapt/Rhot1/Gm46764/Spdl1/Cdc42bpa/Cep19/Fyco1/F8a/2700099C18Rik/Ikbkg/Tmed10-ps/Ltv1/Spice1/Mecp2
GO:0071363	cellular response to growth factor stimulus	52/1687	448/17970	0.0638841	Smpd3/Hspa5/Fgf1/Wnt5a/Tab1/Egr1/Itga8/Ctnnb1/Cyfip1/Wwox/Fgf9/Bmp4/Myocd/Ccn1/Tac1/Dcn/Ror2/Ltbp1/Map3k7/Adgra2/Spry2/Ep300/Hpgd/Fgfr3/Nr4a1/Zfp36l2/Smoc2/Nos1/Rgmb/Smad9/Nus1/Postn/Ctdspl2/Grem1/Nptn/Pgf/Foxc1/Sort1/Dstyk/Pde3a/Spred1/Grem2/Ppp1r9b/Sh3gl2/Megf8/Tgfbr1/Nos3/Zfyve27/Veph1/Star/Egr3/Zeb1
GO:0034250	positive regulation of cellular amide metabolic process	14/1687	96/17970	0.0641118	Smpd3/Ddx3x/Zcchc4/Rmnd1/Ccn1/Abca2/Ep300/Larp4/Pld1/Jmjd4/Ythdf2/Mief1/Polr2d/Nsun4
GO:0009205	purine ribonucleoside triphosphate metabolic process	12/1687	79/17970	0.0641754	Nme6/Dnajc30/Gtpbp1/Prkn/Itpa/COX2/Gm6581/Atp5d/Nme7/Ldhd/Atp5b/Entpd1
GO:0043255	regulation of carbohydrate biosynthetic process	12/1687	79/17970	0.0641754	Smpd3/Dgkq/Ep300/Ppp1cb/Fam3a/Ppp1r3d/Sesn2/Gper1/Ptger4/Pask/Epm2aip1/Supt20
GO:0032388	positive regulation of intracellular transport	18/1687	131/17970	0.0645303	Edem1/Zc3h12a/Wipf1/Kcnb1/Riok2/Ep300/Pcm1/Tmem30b/Mtmr2/Mief1/Mavs/Ctdspl2/Edem2/Gper1/Prr5l/Hspa1l/Cep290/Mecp2
GO:0007162	negative regulation of cell adhesion	25/1687	194/17970	0.0645555	Dab1/Arg2/Mmp2/Zc3h12a/Ppm1f/Bmp4/Nrarp/Podxl/Pawr/Nat8/Peli1/Arhgap6/Bcl6/Zfp608/Fgl2/Il20rb/Ythdf2/Atp5b/Cdh13/Tnfaip3/Postn/Marchf7/Adam10/Ccl28/Cblb
GO:0051493	regulation of cytoskeleton organization	48/1687	410/17970	0.0646939	Tmsb4x/Ctnnb1/Cyfip1/Tmod3/Ppm1f/Slain2/Tac1/Rangrf/Cd2ap/Sh3bp1/Eps8/Rnf4/Mid1/Nes/Ep300/Cdkn1b/Prkn/Ppp1r9a/Cep295/Sptbn2/Gm52861/Pdxp/Sh3pxd2b/Arhgap6/Spast/Togaram1/Limch1/Pde4dip/Mapt/Capza2/Ttbk2/F2rl1/Mapre1/Plekhh2/Ptger4/Avil/Stmn2/Abitram/Xrcc3/Wasl/Alox15/Gm40363/Gm53330/Tgfbr1/Synpo2/Spice1/Actr3/Mecp2
GO:0032784	regulation of DNA-templated transcription, elongation	6/1687	31/17970	0.0651628	Leo1/Ctnnb1/Ell2/Ell3/Ercc6/Setd5
GO:0035088	establishment or maintenance of apical/basal cell polarity	6/1687	31/17970	0.0651628	Wnt5a/Arf4/Sh3bp1/Lama1/Tcf15/Ophn1
GO:0035794	positive regulation of mitochondrial membrane permeability	6/1687	31/17970	0.0651628	Zfp13/Chchd10/Bnip3l-ps/Eya2/Rhot1/Gm20604
GO:0051972	regulation of telomerase activity	6/1687	31/17970	0.0651628	Ctnnb1/Terf1/Cct4/Tnks/Grem1/Pif1
GO:0061245	establishment or maintenance of bipolar cell polarity	6/1687	31/17970	0.0651628	Wnt5a/Arf4/Sh3bp1/Lama1/Tcf15/Ophn1
GO:2000772	regulation of cellular senescence	6/1687	31/17970	0.0651628	Hmga1b/Arg2/Slc30a10/Bmal1/Pawr/Bcl6
GO:0071559	response to transforming growth factor beta	21/1687	158/17970	0.0654006	Hspa5/Wnt5a/Tab1/Itga8/Wwox/Myocd/Ltbp1/Map3k7/Spry2/Ep300/Hpgd/Zfp36l2/Smad9/Postn/Pde3a/Spred1/Tgfbr1/Nos3/Veph1/Star/Zeb1
GO:0051338	regulation of transferase activity	64/1687	565/17970	0.0654636	Ccnd1/Wnt5a/Tab1/Egr1/Ctnnb1/Dab1/Ppia/Ppm1f/Ccni/Ltf/Bmp4/Myocd/Ccn1/Pik3cg/Ppp2ca/Ror2/Map3k21/Avpi1/Gm46840/Hexim2/Map3k7/Tyro3/Spry2/Fgfr3/Cdkn1b/Prkn/Slc27a1/Ppp1r9a/Cdkn1c/Prlr/Pcp4/Ephb3/Irgm2/Mvp/Il18/Map3k13/Tigar/Arrdc4/Terf1/Cct4/Pik3r5/Mapt/Epha2/Tnfaip3/Tnks/Ccne2/Sesn2/Pak6/Grem1/Map3k20/Adnp/Dstyk/Pik3r6/Dcun1d4/Spred1/Dusp6/Pif1/Tgfbr1/Dnaja1/Tgfa/Epm2aip1/Synpo2/Rbl2/Cblb
GO:0071345	cellular response to cytokine stimulus	64/1687	565/17970	0.0654636	Smpd3/Hspa5/Wnt5a/Ifitm2/Egr1/Zc3h12a/Syngr1/Mpc1/Kmo/Eno1b/Ppp2ca/Ifit1bl2/Pdia3/Srm/Traf3/Cth/Ccl8/Slc26a6/Nrp2/Spry2/Ifit3/Spock2/Prkn/Slc27a1/Zfp36l2/Ccl20/Ccl9/Gbp3/Prlr/Mrpl15/H2bc21/Il22ra2/Il3ra/Irgm2/Il18/Mtf2/C1qtnf4/Edn2/Il20rb/Reg1/Ythdf2/Dcst1/Atp5b/Ccl22/Mavs/Postn/F830016B08Rik/Adam23/Cxcl11/Gpd1/F2rl1/Jagn1/Gper1/Card14/Foxc1/Casp1/Ifit1bl1/Sirpa/Grem2/Ifi47/Alox15/Ocln/Etv3/Star
GO:0007265	Ras protein signal transduction	28/1687	222/17970	0.0659525	Cyfip1/Rangrf/Rit1/Stard8/Pik3cg/Sh3bp1/Gpr55/Gpr20/Gm38514/Adgrg1/Spry2/Arhgap32/Arhgap42/Bcl6/Rab9/Aatk/F2rl2/Snora73b/Shoc2/Rab33b/Cdh13/Ophn1/F2rl1/Rasgrp3/Ctnnal1/Gm52186/Gpr4/Dennd4c
GO:0035304	regulation of protein dephosphorylation	11/1687	71/17970	0.066168	Mgat5/Ppia/Camta1/Cdca2/Ppp2ca/Ywhab/Pawr/Ppp1r2/Ppp1r2-ps2/Ppp1r9b/Cnep1r1
GO:0072655	establishment of protein localization to mitochondrion	11/1687	71/17970	0.066168	Mtch2/Hk1/Timm9/Timm17b/Gm30251/Samm50/Bnip3l-ps/Mapt/Gm20604/Hspa1l/Dnaja1
GO:0019725	cellular homeostasis	75/1687	673/17970	0.0661979	Prdx6b/Gaa/Smpd3/Pdx1/Wnt5a/Kcnq1/Kcnk3/Hk1/Grin2d/Bmp4/Kcnb1/Abca2/Tac1/Slc30a10/Adm/Pik3cg/Ppp2ca/Birc5/Gpr55/Gpr27/Gpr20/Slc26a6/Pawr/Hrc/Tyro3/Heph/Chd7/Gsr/Slc30a1/Prkn/Dld/Ptger2/Nos1/Tmem106b/Serpinb1a/Slc4a3/1700034H15Rik/F2rl2/Slc26a3/Edn2/Wfs1/Slc9a5/Tmem165/Atp5b/Rhot1/Hkdc1/Txnrd3/Slc31a2/Slc12a6/Tmem199/Nptn/Kcne3/Immt/Cxcl11/Nucb2/F2rl1/Gm36279/Rnf135/Atp6ap2/Atp7b/Jagn1/Gper1/Ptger…
GO:0001501	skeletal system development	41/1687	344/17970	0.0663774	Smpd3/Miga2/Wnt5a/Ctc1/Ctnnb1/Mmp2/Wwox/Ltf/Fgf9/Bmp4/Ccn1/Ccdc154/Usp1/Ror2/Mboat2/Bmp3/Sp5/Map3k7/Hoxb3/Ep300/Chd7/Pitx2/Tcf15/Plekha1/Slc39a3/Cdkn1c/Wnt9b/Sh3pxd2b/Smad9/Etl4/Mgp/Epha2/Grem1/Ptger4/Foxc1/Tapt1/Megf8/Tgfbr1/Cdk20/Timp1/Zeb1
GO:1902532	negative regulation of intracellular signal transduction	41/1687	344/17970	0.0663774	Pdx1/Rnf34/Ddx3x/Zc3h12a/Kptn/Wtip/Dynlt1c/Ppia/Bmp4/Sesn3/Cd2ap/Sh3bp1/Bmal1/Casp8/Spry2/Vnn1/Plekha1/Prkn/Arhgap42/Ell3/Bcl6/Wfs1/Tnfaip8l1/Epha2/Sh3rf2/Tnfaip3/Marchf7/Sesn2/Nucb2/F2rl1/Ifi35/Gper1/Usp47/Sirpa/Otud7a/Pde3a/Spred1/Atad5/Dusp6/Dnaja1/Olfm4
GO:0043068	positive regulation of programmed cell death	51/1687	440/17970	0.0672243	Mtch2/Wnt5a/Egr1/Ctnnb1/Ddx3x/Mmp2/Zc3h12a/Wwox/Ppm1f/Degs1/Bmp4/Ccn1/Inhba/Zfp13/Adm/Aldh1a1/Ppp2ca/Chchd10/Pdia3/Casp8/Pawr/Hpgd/Nr4a1/Prkn/Melk/Klf11/Gm8283/Bcl6/Bnip3l-ps/Il18/Tigar/Nqo2/Zfp346/Gm20604/Syce3/Stk17b/Casp8ap2/Adam10/Map3k20/Tnfrsf10b/Gper1/Septin4/Casp1/Sort1/Gramd4/C6/Dusp6/Tgfbr1/Dnaja1/Unc13b/Nos3
GO:0060021	roof of mouth development	10/1687	63/17970	0.0678322	Wnt5a/Tbx2/Inhba/Chd7/Plekha1/Wnt9b/Ephb3/Wdpcp/Tgfbr1/Cdk20
GO:2000117	negative regulation of cysteine-type endopeptidase activity	10/1687	63/17970	0.0678322	Lamtor5/Rnf34/Ddx3x/Ltf/Naip1/Birc5/Ep300/Nr4a1/Csnk2a1-ps3/Usp47
GO:0035690	cellular response to drug	35/1687	288/17970	0.0680961	Smpd3/Hspa5/Egr1/Kcnq1/Ctnnb1/Zc3h12a/Ppm1f/Bmp4/Ndor1/Ppp2ca/Rnf4/Pawr/Plekha1/Prkn/Dcps/Gnb5/Amigo1/Pdxp/Ddx11/Gm46878/Ly6g2/Gnao1/Tnfaip3/Rnf146/Slc23a2/Gper1/Adcy1/Abcg2/Sirpa/Oser1/Dnmt3b/Ppp1r9b/Ankzf1/Star/Trerf1
GO:0043414	macromolecule methylation	29/1687	232/17970	0.0681783	Nop2/Cmtr1/Ctnnb1/Zcchc4/Mrm2/Fam98b/Smyd2/Lcmt2/Arid4a/Prmt3/Trmt12/Mtf2/Setd5/Setd7/Wtap/Mettl21a/Tfb1m/Gm36279/Chtop/Pwp1/Dydc2/Dnmt3b/Nsun4/Bcdin3d/Trmt6/Eef1akmt1/Trdmt1/Mecp2/Wdr5b
GO:0022406	membrane docking	7/1687	39/17970	0.0682854	Stx6/Rims2/Kcnb1/Bloc1s6/Bves/Unc13b/Cep290
GO:0032922	circadian regulation of gene expression	7/1687	39/17970	0.0682854	Egr1/Maged1/Bmal1/Ppp1cb/Per2/Hnf1b/Lgr4
GO:0061337	cardiac conduction	7/1687	39/17970	0.0682854	Kcnq1/Rangrf/Hrc/Pkp2/Slc4a3/Kcne3/Dsp
GO:0070534	protein K63-linked ubiquitination	7/1687	39/17970	0.0682854	Ddx3x/Rnf4/Traf3/Prkn/Peli1/Rnf135/Trim21
GO:1902883	negative regulation of response to oxidative stress	7/1687	39/17970	0.0682854	Ctnnb1/Ppia/Vnn1/Prkn/Meak7/Rnf146/Ncoa7
GO:0006829	zinc ion transport	5/1687	24/17970	0.0683933	Slc30a10/Slc30a7/Slc30a1/Slc39a3/1700034H15Rik
GO:0045981	positive regulation of nucleotide metabolic process	5/1687	24/17970	0.0683933	Prkn/COX2/Nos1/Gpd1/Nos3
GO:0086065	cell communication involved in cardiac conduction	5/1687	24/17970	0.0683933	Kcnq1/Rangrf/Hrc/Pkp2/Dsp
GO:0090184	positive regulation of kidney development	5/1687	24/17970	0.0683933	Egr1/Bmp4/Sox8/Lgr4/Grem1
GO:1900544	positive regulation of purine nucleotide metabolic process	5/1687	24/17970	0.0683933	Prkn/COX2/Nos1/Gpd1/Nos3
GO:1905332	positive regulation of morphogenesis of an epithelium	5/1687	24/17970	0.0683933	Ctnnb1/Bmp4/Sox8/Lgr4/Grem1
GO:0006613	cotranslational protein targeting to membrane	4/1687	17/17970	0.0684481	Srp54c/Tram1/Ssr3/Srp54a
GO:0006614	SRP-dependent cotranslational protein targeting to membrane	4/1687	17/17970	0.0684481	Srp54c/Tram1/Ssr3/Srp54a
GO:0007413	axonal fasciculation	4/1687	17/17970	0.0684481	Wnt5a/Amigo1/Ephb3/Megf8
GO:0009127	purine nucleoside monophosphate biosynthetic process	4/1687	17/17970	0.0684481	Ampd2/Adss/Ampd3/Ada
GO:0009168	purine ribonucleoside monophosphate biosynthetic process	4/1687	17/17970	0.0684481	Ampd2/Adss/Ampd3/Ada
GO:0010458	exit from mitosis	4/1687	17/17970	0.0684481	Birc5/Cdkn1b/Cdkn1c/Spast
GO:0010971	positive regulation of G2/M transition of mitotic cell cycle	4/1687	17/17970	0.0684481	Ccnd1/Cdc25a/Dtl/Mecp2
GO:0019359	nicotinamide nucleotide biosynthetic process	4/1687	17/17970	0.0684481	Kmo/Nmnat3/Kynu/Nmrk1
GO:0019363	pyridine nucleotide biosynthetic process	4/1687	17/17970	0.0684481	Kmo/Nmnat3/Kynu/Nmrk1
GO:0032682	negative regulation of chemokine production	4/1687	17/17970	0.0684481	Arg2/Epha2/F2rl1/Sirpa
GO:0034472	snRNA 3'-end processing	4/1687	17/17970	0.0684481	Tut1/Exosc4/Toe1/Ints7
GO:0036342	post-anal tail morphogenesis	4/1687	17/17970	0.0684481	Wnt5a/Sp5/Tcf15/Epha2
GO:0043267	negative regulation of potassium ion transport	4/1687	17/17970	0.0684481	Kcnq1/Nos1/Kcne3/Nos3
GO:0045837	negative regulation of membrane potential	4/1687	17/17970	0.0684481	Mtch2/Ltf/Bnip3l-ps/Mapt
GO:0065005	protein-lipid complex assembly	4/1687	17/17970	0.0684481	Lpcat3/Soat2/Lcat/Sh3gl2
GO:0070242	thymocyte apoptotic process	4/1687	17/17970	0.0684481	Wnt5a/Bmp4/Casp8/Ada
GO:0106030	neuron projection fasciculation	4/1687	17/17970	0.0684481	Wnt5a/Amigo1/Ephb3/Megf8
GO:1902230	negative regulation of intrinsic apoptotic signaling pathway in response to DNA damage	4/1687	17/17970	0.0684481	Ell3/Marchf7/Usp47/Atad5
GO:0017144	drug metabolic process	53/1687	460/17970	0.0687385	Smpd3/Duox2/Pcbd2/Egr1/Rnf34/Zc3h12a/Dkk3/Enoph1/Zfp13/Kmo/Aldh1a1/Dnajc30/Duoxa2/Maob/Gm8234/Dgkq/Cth/Cyp2t4/Ddah1/Prkn/Noxa1/Gm9199/COX2/Nos1/H6pd/Pdxp/Hal/Aldh5a1/Nt5e/Particl/Pla2g5/Gm6581/Atp5d/Pcbd1/Pycr1/Kynu/Adss/Ldhd/Atp5b/Entpd1/Cyp4f18/Clybl/Cat/Ada/Ddah2/Ptger4/Sirpa/Asns/Cyp46a1/Shmt1/Nos3/Pla2g4c/Star
GO:0006941	striated muscle contraction	14/1687	97/17970	0.0687538	Gaa/Kcnq1/Arg2/Zc3h12a/Rangrf/Nr4a1/Myl4/Pkp2/Nos1/Kcne3/Tnnt3/Tnni2/Dsp/Tnni1
GO:0046660	female sex differentiation	14/1687	97/17970	0.0687538	Hspa5/Wnt5a/Mmp2/Bmp4/Inhba/Tyro3/Chd7/Pitx2/Plekha1/Stra6/Edn2/Ptger4/Foxc1/Nos3
GO:0015918	sterol transport	9/1687	55/17970	0.0689721	Lpcat3/Abca2/Stard5/Nus1/Abca3/Abca5/Soat2/Lcat/Star
GO:0034121	regulation of toll-like receptor signaling pathway	9/1687	55/17970	0.0689721	Ddx3x/Ltf/Tyro3/Peli1/Tnfaip3/Lgr4/F2rl1/Ifi35/Gramd4
GO:0010948	negative regulation of cell cycle process	21/1687	159/17970	0.0689883	Ccnd1/Fbxo31/Nme6/Bmp4/Mad1l1/Birc5/Dtl/Zwint/Wapl/Zfp36l2/Ticrr/Wac/Zfp655/Gm2788/Tnks/Spdl1/Gper1/Usp47/Xrcc3/2700099C18Rik/Rbl2
GO:0032872	regulation of stress-activated MAPK cascade	20/1687	150/17970	0.0689928	Wnt5a/Zc3h12a/Ppia/Ror2/Map3k21/Unc5cl/Traf3/Map3k7/Mid1/Prkn/Nbr1/Mturn/Map3k13/Cd27/Sh3rf2/F2rl1/Map3k20/Rell2/Sirpa/Dnaja1
GO:2001020	regulation of response to DNA damage stimulus	20/1687	150/17970	0.0689928	Mtch2/Cul4a/Usp1/Smyd2/Ell3/Ier3/Ercc6/Ddx11/Tigar/Eya2/Mapt/Npas2/Marchf7/Rad52/Map3k20/Usp47/Polq/Spred1/Atad5/Terf2ip
GO:0040017	positive regulation of locomotion	48/1687	412/17970	0.0690434	Tmsb4x/Fbxo31/Hspa5/Wnt5a/Egr1/Cldn3/Mmp2/Zc3h12a/Mgat5/Gm12854/Ppm1f/Fgf9/Bmp4/Ccn1/Tac1/Pik3cg/Duoxa2/Ror2/Atoh8/Adgra2/Pawr/Spry2/Rin2/Sema6c/Ccl20/Smoc2/Il18/Edn2/Nus1/Rab5a/Atp5b/Cdh13/Sh3rf2/Dock1/Postn/Adam10/F2rl1/Pgf/Gper1/Ptger4/Rapgef4/Fut7/Tnfrsf18/Megf8/Tgfbr1/Bves/Synpo2/Nos3
GO:0007062	sister chromatid cohesion	8/1687	47/17970	0.0692848	Ctnnb1/Rec8/Wapl/Gm33950/Ddx11/Esco1/Tnks/Sgo2a
GO:0055008	cardiac muscle tissue morphogenesis	8/1687	47/17970	0.0692848	Wnt5a/Chd7/Pitx2/Pkp2/Foxc1/Tgfbr1/Dsp/Tnni1
GO:0048562	embryonic organ morphogenesis	27/1687	214/17970	0.0697025	Wnt5a/Kcnq1/Itga8/Ctnnb1/Tbx2/Fgf9/Bmp4/Aldh1a1/Ror2/Sobp/Spry2/Hoxb3/Chd7/Pitx2/Slc39a3/Wnt9b/Sec24b/Stra6/Hnf1b/Snora73b/Epha2/Wdpcp/Dnaaf1/Megf8/Tgfbr1/Cep290/Zeb1
GO:0007389	pattern specification process	38/1687	317/17970	0.0699217	Wnt5a/Frat1/Ctnnb1/Lrp4/Aurka/Tbx2/Bmp4/Nrarp/Ror2/Scmh1/Adgrg1/Nrp2/Hoxb3/Ep300/Pitx2/Tcf15/Meis3/Gorab/Galnt11/Gm47324/Mtf2/Dnaaf2/Hnf1b/Gas8/Dnaaf1/Grem1/Atp6ap2/Foxc1/Egr2/Grem2/Gm32342/Megf8/Tgfbr1/Rfng/Mns1/Cep290/Cdk20/Zeb1
GO:0002683	negative regulation of immune system process	42/1687	355/17970	0.0699519	Leo1/Ctnnb1/Arg2/Zc3h12a/Ltf/Bmp4/Cul4a/Gpx2/Milr1/Nrarp/Gpr55/Slc30a7/Pawr/Tyro3/Tcf15/Pglyrp1/Peli1/Bcl6/Zfp608/Il18/Fgl2/Il20rb/Ythdf2/Dcst1/Tnfaip3/Lgr4/Marchf7/Cd55/Btnl2/Grem1/Ada/F2rl1/Gper1/Gpx2-ps1/Ptger4/Gramd4/Alox15/Il1rl1/Trim21/Ccl28/Olfm4/Cblb
GO:0051051	negative regulation of transport	40/1687	336/17970	0.0700145	Snph/Kcnq1/Cyfip1/Ppm1f/Kcnb1/Dysf/Abca2/Ppp2ca/Maob/Pawr/Hrc/Slc30a1/Prkn/Lman2l/Ppp1r9a/Gnb5/Nos1/Cttnbp2nl/Gm32340/1700034H15Rik/Mtmr2/Mapt/Edn2/Gnao1/Entpd1/Prtn3/Cyp4f18/Ubqln2/Kcne3/Pip4p2/Ada/Nucb2/Fer1l5/Jagn1/Ptger4/Abcg2/Sirpa/Pacsin3/Nos3/Ankrd13b
GO:0030182	neuron differentiation	103/1687	953/17970	0.0704836	Ywhah/Gdpd5/Fbxo31/Hspa5/Snph/Wnt5a/Kcnq1/Katna1/Ctnnb1/Dab1/Lrp4/Mmp2/Cyfip1/Aurka/Dynlt1c/Rims2/Ppia/Bmp4/Tbc1d24/Lamb2/Inhba/Bnip2/Adm/Arf4/Raph1/Lama1/Ror2/Atoh8/Nrp2/Ep300/Bloc1s6/Pitx2/Prkn/Npy/Sema6c/Ppp1r9a/Mturn/Zfp521/Cdkn1c/Prmt3/Sema4f/Pcp4/Sipa1l1/Wnt9b/Amigo1/Cpne9/Ephb3/Fstl4/Uqcrq/Ift56/Bcl6/Spast/Aatk/Draxin/Tmem106b/Sec24b/Ercc6/Herc1/Map3k13/Sox8/Mtmr2/Mapt/Mylip/Reg1/Epha2/Fai…
GO:0043549	regulation of kinase activity	56/1687	490/17970	0.0707757	Ccnd1/Wnt5a/Tab1/Egr1/Dab1/Ppia/Ppm1f/Ccni/Ltf/Bmp4/Myocd/Ccn1/Pik3cg/Ppp2ca/Ror2/Map3k21/Avpi1/Gm46840/Hexim2/Map3k7/Tyro3/Spry2/Fgfr3/Cdkn1b/Prkn/Slc27a1/Ppp1r9a/Cdkn1c/Prlr/Pcp4/Ephb3/Irgm2/Mvp/Il18/Map3k13/Tigar/Pik3r5/Mapt/Epha2/Tnfaip3/Ccne2/Sesn2/Pak6/Grem1/Map3k20/Adnp/Dstyk/Pik3r6/Spred1/Dusp6/Tgfbr1/Dnaja1/Tgfa/Synpo2/Rbl2/Cblb
GO:0061564	axon development	35/1687	289/17970	0.0707817	Wnt5a/Dab1/Lrp4/Mmp2/Cyfip1/Lamb2/Raph1/Lama1/Nrp2/Ep300/Sema6c/Sema4f/Sipa1l1/Amigo1/Ephb3/Fstl4/Spast/Aatk/Draxin/Map3k13/Mapt/Epha2/Gm46764/Lgr4/Wdr36/Nptn/Adnp/Adcy1/Fbxo45/Slitrk4/Egr2/Nefh/Dpysl2/Megf8/Zfyve27
GO:0060627	regulation of vesicle-mediated transport	43/1687	365/17970	0.0710726	Smpd3/Snph/Wnt5a/Rph3al/Cyfip1/Cd177/Rims2/Kcnb1/Dysf/Abca2/Exph5/Cd2ap/Dgkq/Prkn/Lman2l/Syp/Rab9/Sec24b/Pld1/Mtmr2/Sgip1/Rab5a/Cdh13/Prtn3/Ubqln2/Ophn1/Grem1/Pip4p2/F2rl1/Fer1l5/Rapgef4/Stx1a/Adcy1/Septin4/Sirpa/Gm31336/Rspo1/Sh3gl2/Alox15/Pacsin3/Bves/Unc13b/Ankrd13b
GO:0009201	ribonucleoside triphosphate biosynthetic process	11/1687	72/17970	0.0717887	Uck2/Nme6/Dnajc30/Prkn/COX2/Gm6581/Atp5d/Nme7/Ldhd/Atp5b/Entpd1
GO:0019218	regulation of steroid metabolic process	11/1687	72/17970	0.0717887	Egr1/Lpcat3/Dkk3/Abca2/Fdps/Dgkq/Dhcr7/H6pd/Pde8b/Erlin1/Star
GO:1903901	negative regulation of viral life cycle	11/1687	72/17970	0.0717887	Ifitm2/Zc3h12a/Ppia/Ltf/Shfl/Prkn/Morc2a/Isg20/Mavs/Resf1/Trim21
GO:0001934	positive regulation of protein phosphorylation	77/1687	696/17970	0.0719249	Ccnd1/Wnt5a/Tab1/Egr1/Cldn3/Ctnnb1/Ddx3x/Dab1/Lrp4/Zc3h12a/Ppia/Ccnq/Ltf/Fgf9/Bmp4/Ccn1/Inhba/Slc30a10/Bnip2/Pik3cg/Ppp2ca/Ror2/Map3k21/Avpi1/Gpr55/Bmp3/Dgkq/Unc5cl/Traf3/Map3k7/Ccl8/Mid1/Spry2/Ep300/Fgfr3/Cdkn1b/Slc27a1/Adrb3/Ppp1r9a/Ccl20/Mturn/Ccl9/Prlr/Nos1/Irgm2/Ercc6/Il18/Map3k13/Limch1/Pik3r5/Nqo2/Cd27/Ccl22/Sh3rf2/Mavs/Pak6/Grem1/Nptn/F2rl1/Pgf/Akap11/Map3k20/Adnp/Gper1/Rell2/Ptger4/Card1…
GO:0031668	cellular response to extracellular stimulus	22/1687	169/17970	0.0724459	Nudt1/Hspa5/Zc3h12a/Kptn/Kcnb1/Myocd/Sesn3/Slc38a2/Pdia3/Nuak2/Mn1/Prkn/Fads1/Wnt9b/Amigo1/Pdxp/Postn/Tnks/Sesn2/Mios/Dapl1/Adnp
GO:0001807	regulation of type IV hypersensitivity	2/1687	5/17970	0.0726963	Il20rb/Fut7
GO:0001957	intramembranous ossification	2/1687	5/17970	0.0726963	Mmp2/Mn1
GO:0002634	regulation of germinal center formation	2/1687	5/17970	0.0726963	Tnfaip3/Ada
GO:0002692	negative regulation of cellular extravasation	2/1687	5/17970	0.0726963	Ptger4/Ccl28
GO:0003278	apoptotic process involved in heart morphogenesis	2/1687	5/17970	0.0726963	Ccn1/Foxc1
GO:0006616	SRP-dependent cotranslational protein targeting to membrane, translocation	2/1687	5/17970	0.0726963	Srp54c/Tram1
GO:0006777	Mo-molybdopterin cofactor biosynthetic process	2/1687	5/17970	0.0726963	Mocs2/Gphn
GO:0007220	Notch receptor processing	2/1687	5/17970	0.0726963	Galnt11/Adam10
GO:0008295	spermidine biosynthetic process	2/1687	5/17970	0.0726963	Srm/Agmat
GO:0009120	deoxyribonucleoside metabolic process	2/1687	5/17970	0.0726963	Dck/Ada
GO:0009138	pyrimidine nucleoside diphosphate metabolic process	2/1687	5/17970	0.0726963	Entpd4/Entpd4b
GO:0010994	free ubiquitin chain polymerization	2/1687	5/17970	0.0726963	Prkn/Rnf135
GO:0014045	establishment of endothelial blood-brain barrier	2/1687	5/17970	0.0726963	Cldn3/Ctnnb1
GO:0015791	polyol transport	2/1687	5/17970	0.0726963	Slc26a6/Slc5a3
GO:0015889	cobalamin transport	2/1687	5/17970	0.0726963	Cd320/Tcn2
GO:0016103	diterpenoid catabolic process	2/1687	5/17970	0.0726963	Crabp1/Gm32342
GO:0019720	Mo-molybdopterin cofactor metabolic process	2/1687	5/17970	0.0726963	Mocs2/Gphn
GO:0019805	quinolinate biosynthetic process	2/1687	5/17970	0.0726963	Kmo/Kynu
GO:0021855	hypothalamus cell migration	2/1687	5/17970	0.0726963	Nrp2/Pitx2
GO:0031119	tRNA pseudouridine synthesis	2/1687	5/17970	0.0726963	Pus1/Pus10
GO:0031282	regulation of guanylate cyclase activity	2/1687	5/17970	0.0726963	Nos1/Nos3
GO:0032264	IMP salvage	2/1687	5/17970	0.0726963	Ampd2/Ampd3
GO:0033085	negative regulation of T cell differentiation in thymus	2/1687	5/17970	0.0726963	Bmp4/Zfp608
GO:0033615	mitochondrial proton-transporting ATP synthase complex assembly	2/1687	5/17970	0.0726963	Fmc1/Atp5d
GO:0034085	establishment of sister chromatid cohesion	2/1687	5/17970	0.0726963	Wapl/Ddx11
GO:0034093	positive regulation of maintenance of sister chromatid cohesion	2/1687	5/17970	0.0726963	Gm33950/Sgo2a
GO:0034141	positive regulation of toll-like receptor 3 signaling pathway	2/1687	5/17970	0.0726963	Peli1/F2rl1
GO:0034379	very-low-density lipoprotein particle assembly	2/1687	5/17970	0.0726963	Lpcat3/Soat2
GO:0034653	retinoic acid catabolic process	2/1687	5/17970	0.0726963	Crabp1/Gm32342
GO:0035434	copper ion transmembrane transport	2/1687	5/17970	0.0726963	Slc31a2/Atp7b
GO:0036072	direct ossification	2/1687	5/17970	0.0726963	Mmp2/Mn1
GO:0036150	phosphatidylserine acyl-chain remodeling	2/1687	5/17970	0.0726963	Lpcat3/Mboat2
GO:0036302	atrioventricular canal development	2/1687	5/17970	0.0726963	Tbx2/Chd7
GO:0042758	long-chain fatty acid catabolic process	2/1687	5/17970	0.0726963	Cyp4f40/Cyp4f18
GO:0043380	regulation of memory T cell differentiation	2/1687	5/17970	0.0726963	Bcl6/Fgl2
GO:0043545	molybdopterin cofactor metabolic process	2/1687	5/17970	0.0726963	Mocs2/Gphn
GO:0044848	biological phase	2/1687	5/17970	0.0726963	Wnt5a/Ctnnb1
GO:0044851	hair cycle phase	2/1687	5/17970	0.0726963	Wnt5a/Ctnnb1
GO:0045003	double-strand break repair via synthesis-dependent strand annealing	2/1687	5/17970	0.0726963	Rad52/Xrcc3
GO:0048496	maintenance of animal organ identity	2/1687	5/17970	0.0726963	Pkp2/Iqcb1
GO:0048819	regulation of hair follicle maturation	2/1687	5/17970	0.0726963	Wnt5a/Ctnnb1
GO:0051189	prosthetic group metabolic process	2/1687	5/17970	0.0726963	Mocs2/Gphn
GO:0051725	protein de-ADP-ribosylation	2/1687	5/17970	0.0726963	Macrod1/Adprs
GO:0055118	negative regulation of cardiac muscle contraction	2/1687	5/17970	0.0726963	Zc3h12a/Kcne3
GO:0060439	trachea morphogenesis	2/1687	5/17970	0.0726963	Ctnnb1/Bmp4
GO:0060685	regulation of prostatic bud formation	2/1687	5/17970	0.0726963	Wnt5a/Bmp4
GO:0060920	cardiac pacemaker cell differentiation	2/1687	5/17970	0.0726963	Popdc2/Bves
GO:0061476	response to anticoagulant	2/1687	5/17970	0.0726963	Egr1/Reg1
GO:0061549	sympathetic ganglion development	2/1687	5/17970	0.0726963	Ctnnb1/Nrp2
GO:0061952	midbody abscission	2/1687	5/17970	0.0726963	Cep55/Kif20a
GO:0070493	thrombin-activated receptor signaling pathway	2/1687	5/17970	0.0726963	Dgkq/Hpgd
GO:0071651	positive regulation of chemokine (C-C motif) ligand 5 production	2/1687	5/17970	0.0726963	Mavs/Mcoln2
GO:0071763	nuclear membrane organization	2/1687	5/17970	0.0726963	Gper1/Tmem43
GO:0072282	metanephric nephron tubule morphogenesis	2/1687	5/17970	0.0726963	Sox8/Lgr4
GO:0086042	cardiac muscle cell-cardiac muscle cell adhesion	2/1687	5/17970	0.0726963	Pkp2/Dsp
GO:0097050	type B pancreatic cell apoptotic process	2/1687	5/17970	0.0726963	Pdx1/Wfs1
GO:0097466	ubiquitin-dependent glycoprotein ERAD pathway	2/1687	5/17970	0.0726963	Edem1/Edem2
GO:0098880	maintenance of postsynaptic specialization structure	2/1687	5/17970	0.0726963	Ophn1/Gphn
GO:0098915	membrane repolarization during ventricular cardiac muscle cell action potential	2/1687	5/17970	0.0726963	Kcnq1/Kcne3
GO:0150003	regulation of spontaneous synaptic transmission	2/1687	5/17970	0.0726963	Prkn/Ppp1r9a
GO:1900157	regulation of bone mineralization involved in bone maturation	2/1687	5/17970	0.0726963	Ltf/Grem1
GO:1901069	guanosine-containing compound catabolic process	2/1687	5/17970	0.0726963	Entpd4/Entpd4b
GO:1901079	positive regulation of relaxation of muscle	2/1687	5/17970	0.0726963	Pawr/Hrc
GO:1901228	positive regulation of transcription from RNA polymerase II promoter involved in heart development	2/1687	5/17970	0.0726963	Myocd/Grem1
GO:1901341	positive regulation of store-operated calcium channel activity	2/1687	5/17970	0.0726963	Bmp4/Stimate
GO:1901525	negative regulation of mitophagy	2/1687	5/17970	0.0726963	Tigar/Usp30
GO:1903348	positive regulation of bicellular tight junction assembly	2/1687	5/17970	0.0726963	Cldn3/Epha2
GO:1904475	regulation of Ras GTPase binding	2/1687	5/17970	0.0726963	Poldip2/Ccpg1
GO:1904798	positive regulation of core promoter binding	2/1687	5/17970	0.0726963	Ctnnb1/Foxc1
GO:1904953	Wnt signaling pathway involved in midbrain dopaminergic neuron differentiation	2/1687	5/17970	0.0726963	Wnt5a/Wnt9b
GO:1990410	adrenomedullin receptor signaling pathway	2/1687	5/17970	0.0726963	Adm/Calcrl
GO:1990791	dorsal root ganglion development	2/1687	5/17970	0.0726963	Ctnnb1/Nrp2
GO:2001106	regulation of Rho guanyl-nucleotide exchange factor activity	2/1687	5/17970	0.0726963	Poldip2/Ccpg1
GO:2001241	positive regulation of extrinsic apoptotic signaling pathway in absence of ligand	2/1687	5/17970	0.0726963	Wwox/Inhba
GO:0010035	response to inorganic substance	47/1687	404/17970	0.0727034	Nudt1/Smpd3/Hspa5/Pdx1/Wnt5a/Mmp2/Zc3h12a/Sord/Slc30a10/Slc38a2/Ppp2ca/Rnf4/Pawr/Igfbp2/Ep300/Slc30a1/Plekha1/Cdkn1b/Nr4a1/Prkn/Cpne9/Gip/Ercc6/Ddx11/Tigar/Adprs/1700034H15Rik/Mapt/Gnao1/Tnfaip3/Kcnmb3/Rnf146/Ada/Lcat/Adnp/Atp7b/Adcy1/Abcg2/Sirpa/Oser1/Otc/Alox15/Ankzf1/Nos3/Gphn/Mecp2/Star
GO:0034284	response to monosaccharide	21/1687	160/17970	0.0727083	Pdx1/Egr1/Kcnb1/Ppp2ca/Birc5/Gpr27/Slc26a6/Ep300/Cdkn1b/Prkn/Col6a2/Zbed3/Gip/Hnf1b/Eif2b3/Sesn2/Jagn1/Gper1/Hmgn3/Unc13b/Star
GO:0042445	hormone metabolic process	21/1687	160/17970	0.0727083	Ywhah/Egr1/Dkk3/Rdh12/Adm/Aldh1a1/Duoxa2/Dgkq/Plekha1/Dhcr7/Prmt3/Slco4a1/H6pd/Pde8b/Crabp1/Atp6ap2/Cyp46a1/Gm32342/Cpq/Mecp2/Star
GO:0009749	response to glucose	20/1687	151/17970	0.0728319	Pdx1/Egr1/Kcnb1/Ppp2ca/Birc5/Gpr27/Ep300/Cdkn1b/Prkn/Col6a2/Zbed3/Gip/Hnf1b/Eif2b3/Sesn2/Jagn1/Gper1/Hmgn3/Unc13b/Star
GO:0060284	regulation of cell development	78/1687	707/17970	0.0739431	Ywhah/Gdpd5/Fbxo31/Hspa5/Wnt5a/Katna1/Ctnnb1/Dab1/Lrp4/Cyfip1/Nkx6-2/Aurka/Dynlt1c/Rims2/Ltf/Bmp4/Bnip2/Fdps/Ror2/Bmal1/Adgra2/Adgrg1/Hoxb3/Ep300/Chd7/Pcm1/Prkn/Sema6c/Ppp1r9a/Pcp4/Sipa1l1/Nos1/Ell3/Amigo1/Cpne9/Ephb3/Fstl4/Bcl6/Aatk/Draxin/Tmem106b/Per2/Map3k13/Sox8/Mapt/Mylip/Reg1/Ythdf2/Dock1/Gm46764/Postn/Tmem98/Wdr36/Ss18l1/Cul7/Nptn/Slc23a2/Adam10/Akap11/Adnp/Gper1/Rapgef4/Srcin1/Egr2/Prkch…
GO:0031016	pancreas development	10/1687	64/17970	0.0739536	Pdx1/Wnt5a/Ctnnb1/Nkx6-2/Bmp4/Bmal1/Gip/Hnf1b/Wfs1/Dnaaf1
GO:0032465	regulation of cytokinesis	10/1687	64/17970	0.0739536	Poldip2/Aurka/Prc1/Pdxp/Myo19/Spast/Gm2788/Klhl13/Klhl9/Kif20a
GO:0034502	protein localization to chromosome	10/1687	64/17970	0.0739536	Cenpa/Wapl/Gm33950/Terf1/Cct4/Tnks/Spdl1/Mcm8/2700099C18Rik/Terf2ip
GO:0006506	GPI anchor biosynthetic process	6/1687	32/17970	0.0741148	Pgap3/Pgap2/Pigv/Pyurf/Pigg/Pigl
GO:0008299	isoprenoid biosynthetic process	6/1687	32/17970	0.0741148	Pdss2/Fdps/Aldh1a1/Prmt3/Nus1/Hmgcr
GO:0035307	positive regulation of protein dephosphorylation	6/1687	32/17970	0.0741148	Ppia/Camta1/Cdca2/Ppp2ca/Pawr/Cnep1r1
GO:0045599	negative regulation of fat cell differentiation	6/1687	32/17970	0.0741148	Wnt5a/Bmal1/Zfp36l2/Nucb2/Gper1/Sort1
GO:0045806	negative regulation of endocytosis	6/1687	32/17970	0.0741148	Snph/Abca2/Mtmr2/Ubqln2/Pacsin3/Ankrd13b
GO:0051181	cofactor transport	6/1687	32/17970	0.0741148	Cd320/Mgst1/Slc27a1/Slc25a26/Tcn2/Slc23a2
GO:0090175	regulation of establishment of planar polarity	6/1687	32/17970	0.0741148	Wnt5a/Ror2/Jhy/Wnt9b/Sapcd2/Sec24b
GO:1905710	positive regulation of membrane permeability	6/1687	32/17970	0.0741148	Zfp13/Chchd10/Bnip3l-ps/Eya2/Rhot1/Gm20604
GO:2000147	positive regulation of cell motility	46/1687	395/17970	0.0741379	Tmsb4x/Fbxo31/Hspa5/Wnt5a/Egr1/Cldn3/Mmp2/Zc3h12a/Mgat5/Gm12854/Ppm1f/Fgf9/Bmp4/Ccn1/Tac1/Pik3cg/Duoxa2/Ror2/Atoh8/Adgra2/Pawr/Spry2/Rin2/Sema6c/Ccl20/Smoc2/Il18/Edn2/Nus1/Rab5a/Atp5b/Cdh13/Sh3rf2/Dock1/Postn/Adam10/F2rl1/Pgf/Gper1/Ptger4/Rapgef4/Fut7/Tnfrsf18/Tgfbr1/Synpo2/Nos3
GO:0010959	regulation of metal ion transport	32/1687	262/17970	0.0741785	Ywhah/Kcnq1/Ctnnb1/Bmp4/Slc30a10/Rangrf/Pik3cg/Ppp2ca/Pawr/Hrc/Ahnak/Chd7/Slc30a1/Lrrc26/Kcng1/Gnb5/Nos1/Amigo1/Stimate/Nkain1/Saraf/1700034H15Rik/Wfs1/Gnao1/Slc31a2/Kcne3/Cxcl11/Gper1/Cntn1/Pacsin3/Atp2c2/Nos3
GO:0097327	response to antineoplastic agent	12/1687	81/17970	0.0747935	Kdm3b/Egr1/Ctnnb1/Zc3h12a/Bmp4/Rnf4/Ep300/Ddx11/Adam10/Abcg2/Dnmt3b/Star
GO:1902850	microtubule cytoskeleton organization involved in mitosis	15/1687	107/17970	0.0749471	Poldip2/Aurka/Dynlt1c/Cenpa/Prc1/Spry2/Sapcd2/Spast/Togaram1/Mzt1/Spdl1/2700099C18Rik/Togaram2/Spice1/Mecp2
GO:0050890	cognition	28/1687	225/17970	0.0752629	Egr1/Itga8/Cyfip1/Tac1/Arf4/Sobp/Ep300/Chd7/Prkn/Ntan1/Pde8b/Gip/Stra6/Lrrn4/Setd5/Mettl23/Mapt/Nqo2/Pak6/Nptn/Adnp/Bche/Adcy1/Casp1/Egr2/Ppp1r9b/Chrm1/Mecp2
GO:0008543	fibroblast growth factor receptor signaling pathway	9/1687	56/17970	0.0756627	Fgf1/Wnt5a/Ctnnb1/Fgf9/Spry2/Fgfr3/Smoc2/Nptn/Dstyk
GO:0010257	NADH dehydrogenase complex assembly	9/1687	56/17970	0.0756627	Ndufaf3/Ndufab1/Ndufs5-ps/Gm30251/Ndufs6b/Ndufb9/Ndufa1/Nubpl/Ndufc1
GO:0031397	negative regulation of protein ubiquitination	9/1687	56/17970	0.0756627	Ppia/Spry2/Caml/Prmt3/Per2/Sh3rf2/Tnfaip3/Marchf7/Dnaja1
GO:0032981	mitochondrial respiratory chain complex I assembly	9/1687	56/17970	0.0756627	Ndufaf3/Ndufab1/Ndufs5-ps/Gm30251/Ndufs6b/Ndufb9/Ndufa1/Nubpl/Ndufc1
GO:0051453	regulation of intracellular pH	9/1687	56/17970	0.0756627	Slc26a6/Tmem106b/Slc4a3/Slc26a3/Slc9a5/Tmem165/Atp5b/Tmem199/Atp6ap2
GO:0002090	regulation of receptor internalization	7/1687	40/17970	0.0763772	Mtmr2/Ubqln2/Ophn1/Grem1/Rspo1/Sh3gl2/Ankrd13b
GO:0045620	negative regulation of lymphocyte differentiation	7/1687	40/17970	0.0763772	Zc3h12a/Bmp4/Nrarp/Pglyrp1/Bcl6/Zfp608/Fgl2
GO:0051293	establishment of spindle localization	7/1687	40/17970	0.0763772	Dynlt1c/Cenpa/Spry2/Zbed3/Sapcd2/Spdl1/2700099C18Rik
GO:0030858	positive regulation of epithelial cell differentiation	8/1687	48/17970	0.076627	Ctnnb1/Bmp4/Atoh8/Gm31597/Akap11/Foxc1/Prkch/Proc
GO:0071230	cellular response to amino acid stimulus	8/1687	48/17970	0.076627	Mmp2/Sesn3/Prkn/Amigo1/Sesn2/Col16a1/Dnmt3b/Zeb1
GO:0097061	dendritic spine organization	8/1687	48/17970	0.076627	Ppp1r9a/Prmt3/Sipa1l1/Ephb3/Mtmr2/Adam10/Srcin1/Abhd17b
GO:0070302	regulation of stress-activated protein kinase signaling cascade	20/1687	152/17970	0.0768128	Wnt5a/Zc3h12a/Ppia/Ror2/Map3k21/Unc5cl/Traf3/Map3k7/Mid1/Prkn/Nbr1/Mturn/Map3k13/Cd27/Sh3rf2/F2rl1/Map3k20/Rell2/Sirpa/Dnaja1
GO:0031669	cellular response to nutrient levels	19/1687	143/17970	0.0769045	Hspa5/Zc3h12a/Kptn/Kcnb1/Sesn3/Slc38a2/Pdia3/Nuak2/Mn1/Prkn/Fads1/Wnt9b/Amigo1/Pdxp/Postn/Tnks/Sesn2/Mios/Dapl1
GO:0046661	male sex differentiation	19/1687	143/17970	0.0769045	Nudt1/Wnt5a/Nasp/Ctnnb1/Fgf9/Inhba/Ror2/Patz1/Adgrg1/Rec8/Pitx2/Plekha1/Arid4a/Wnt9b/Smad9/Sox8/Lgr4/Tgfbr1/Star
GO:0000097	sulfur amino acid biosynthetic process	3/1687	11/17970	0.0769103	Enoph1/Cth/Cbs
GO:0002091	negative regulation of receptor internalization	3/1687	11/17970	0.0769103	Mtmr2/Ubqln2/Ankrd13b
GO:0002467	germinal center formation	3/1687	11/17970	0.0769103	Bcl6/Tnfaip3/Ada
GO:0006704	glucocorticoid biosynthetic process	3/1687	11/17970	0.0769103	Dkk3/Dgkq/H6pd
GO:0006857	oligopeptide transport	3/1687	11/17970	0.0769103	Cdh17/Mgst1/Slc26a6
GO:0007096	regulation of exit from mitosis	3/1687	11/17970	0.0769103	Birc5/Cdkn1b/Cdkn1c
GO:0010832	negative regulation of myotube differentiation	3/1687	11/17970	0.0769103	Myocd/Plpp7/Trim72
GO:0015701	bicarbonate transport	3/1687	11/17970	0.0769103	Car4/Slc26a6/Slc4a3
GO:0018410	C-terminal protein amino acid modification	3/1687	11/17970	0.0769103	Lcmt2/Irgm2/Gm46764
GO:0021681	cerebellar granular layer development	3/1687	11/17970	0.0769103	Faim2/Ophn1/Ttbk2
GO:0035269	protein O-linked mannosylation	3/1687	11/17970	0.0769103	Pomt2/Pomt1/Large2
GO:0035630	bone mineralization involved in bone maturation	3/1687	11/17970	0.0769103	Ltf/Ccdc154/Grem1
GO:0035872	nucleotide-binding domain, leucine rich repeat containing receptor signaling pathway	3/1687	11/17970	0.0769103	Rnf34/Irgm2/Tnfaip3
GO:0042048	olfactory behavior	3/1687	11/17970	0.0769103	Ubr3/Chd7/Wfs1
GO:0043576	regulation of respiratory gaseous exchange	3/1687	11/17970	0.0769103	Slc5a3/Pask/Mecp2
GO:0046112	nucleobase biosynthetic process	3/1687	11/17970	0.0769103	Gm5867/Ada/Dhodh
GO:0048199	vesicle targeting, to, from or within Golgi	3/1687	11/17970	0.0769103	Arfgap2/Cep19/Tmed10-ps
GO:0060572	morphogenesis of an epithelial bud	3/1687	11/17970	0.0769103	Wnt5a/Ctnnb1/Bmp4
GO:0061323	cell proliferation involved in heart morphogenesis	3/1687	11/17970	0.0769103	Ctnnb1/Bmp4/Pitx2
GO:0071371	cellular response to gonadotropin stimulus	3/1687	11/17970	0.0769103	Inhba/Ppp2ca/Star
GO:0072567	chemokine (C-X-C motif) ligand 2 production	3/1687	11/17970	0.0769103	Postn/Mcoln2/F2rl1
GO:0110156	methylguanosine-cap decapping	3/1687	11/17970	0.0769103	Dcps/Patl1/Dcp2
GO:1903236	regulation of leukocyte tethering or rolling	3/1687	11/17970	0.0769103	Pawr/Fut7/Ccl28
GO:1905146	lysosomal protein catabolic process	3/1687	11/17970	0.0769103	Tmem106b/Tmem199/Laptm4b
GO:1990403	embryonic brain development	3/1687	11/17970	0.0769103	Ctnnb1/Ttbk2/Cdk20
GO:2000341	regulation of chemokine (C-X-C motif) ligand 2 production	3/1687	11/17970	0.0769103	Postn/Mcoln2/F2rl1
GO:0019216	regulation of lipid metabolic process	34/1687	282/17970	0.0776722	Golm1/Smpd3/Egr1/Fmc1/Lpcat3/Tysnd1/Dkk3/Ccn1/Abca2/Fdps/Pik3cg/Lonp2/Dgkq/Hpgd/Fgfr3/Slc27a1/Dhcr7/Prmt3/H6pd/Pde8b/Gip/Cpt1a/Fam3a/Elovl5/Pik3r5/Erlin1/Mtmr2/Abca3/Nucb2/Gper1/Avil/Cnep1r1/Rbl2/Star
GO:0032602	chemokine production	11/1687	73/17970	0.0777049	Wnt5a/Egr1/Arg2/Il18/Epha2/Mavs/Postn/Mcoln2/F2rl1/Sirpa/Il1rl1
GO:0032642	regulation of chemokine production	11/1687	73/17970	0.0777049	Wnt5a/Egr1/Arg2/Il18/Epha2/Mavs/Postn/Mcoln2/F2rl1/Sirpa/Il1rl1
GO:0035082	axoneme assembly	11/1687	73/17970	0.0777049	Jhy/Ift56/Togaram1/Gm47324/Dnaaf2/Gas8/Dnaaf1/Cfap157/Armc2/Zmynd10/Mns1
GO:1902106	negative regulation of leukocyte differentiation	11/1687	73/17970	0.0777049	Ctnnb1/Zc3h12a/Ltf/Bmp4/Cul4a/Nrarp/Gpr55/Pglyrp1/Bcl6/Zfp608/Fgl2
GO:1901990	regulation of mitotic cell cycle phase transition	25/1687	198/17970	0.0779307	Ccnd1/Fbxo31/Ctc1/Cdc25a/Ddx3x/Cul4a/Mad1l1/Riok2/Cenpf/Birc5/Dtl/Zwint/Cdkn1b/Zfp36l2/Cdkn1c/Ticrr/Wac/Zfp655/Spdl1/Usp47/Xrcc3/2700099C18Rik/Atad5/Rbl2/Mecp2
GO:0002335	mature B cell differentiation	5/1687	25/17970	0.0791713	Cdh17/Pou2af1/Tnfaip3/Ada/Dock11
GO:0007616	long-term memory	5/1687	25/17970	0.0791713	Egr1/Tac1/Lrrn4/Adcy1/Mecp2
GO:0034123	positive regulation of toll-like receptor signaling pathway	5/1687	25/17970	0.0791713	Ddx3x/Ltf/Peli1/F2rl1/Ifi35
GO:0048488	synaptic vesicle endocytosis	5/1687	25/17970	0.0791713	Bltp1/Dgkq/Syp/Ophn1/Sh3gl2
GO:0070528	protein kinase C signaling	5/1687	25/17970	0.0791713	Wnt5a/Dgkq/Slc26a6/Adgrg1/Prkch
GO:0140238	presynaptic endocytosis	5/1687	25/17970	0.0791713	Bltp1/Dgkq/Syp/Ophn1/Sh3gl2
GO:1901658	glycosyl compound catabolic process	5/1687	25/17970	0.0791713	Nudt1/Entpd4/Entpd4b/Upb1/Ada
GO:0048568	embryonic organ development	39/1687	330/17970	0.0792618	Krt19/Wnt5a/Kcnq1/Itga8/Ctnnb1/Tbx2/Fgf9/Bmp4/Ccn1/Adm/Aldh1a1/Ror2/Sobp/Nes/Spry2/Hoxb3/Ccdc134/Chd7/Pitx2/Slc39a3/Cdkn1c/Wnt9b/Sec24b/Stra6/Hnf1b/Snora73b/Epha2/Gm2788/Wdpcp/Dnaaf1/Ttbk2/Ada/Foxc1/Megf8/Tgfbr1/Cep290/Syna/Cdk20/Zeb1
GO:0014074	response to purine-containing compound	15/1687	108/17970	0.0798488	Hspa5/Kcnq1/Pik3cg/Dgkq/Slc26a6/P2rx6/Pdxp/Pla2g5/Slc26a3/Aqp8/Gpd1/Casp1/Pde3a/Dnmt3b/Star
GO:0043271	negative regulation of ion transport	15/1687	108/17970	0.0798488	Kcnq1/Ppp2ca/Maob/Pawr/Hrc/Slc30a1/Gnb5/Nos1/1700034H15Rik/Gnao1/Entpd1/Cyp4f18/Kcne3/Pacsin3/Nos3
GO:0019935	cyclic-nucleotide-mediated signaling	22/1687	171/17970	0.0800379	Rims2/Adm/Dgkq/Adgrg1/Adrb3/Ptger2/Nos1/Gip/S1pr4/Cxcl11/Cap2/Nucb2/Calcrl/Adnp/Gper1/Ptger4/Rapgef4/Adcy1/Pde3a/Adgre1/Tbxa2r/Gpr4
GO:0006939	smooth muscle contraction	12/1687	82/17970	0.0804997	Smpd3/Tbx2/Myocd/Gucy1a1/Pawr/Arhgap42/Edn2/Ada/Calcrl/Gper1/Ptger4/Tbxa2r
GO:0048706	embryonic skeletal system development	12/1687	82/17970	0.0804997	Wnt5a/Ctnnb1/Fgf9/Bmp4/Hoxb3/Slc39a3/Wnt9b/Etl4/Megf8/Tgfbr1/Cdk20/Zeb1
GO:0035148	tube formation	16/1687	117/17970	0.0806113	Wnt5a/Ctnnb1/Bmp4/Adm/Luzp1/Atoh8/Casp8/Map3k7/Wnt9b/Sec24b/Sox8/Hnf1b/Snora73b/Grem1/Cep290/Cdk20
GO:2001252	positive regulation of chromosome organization	16/1687	117/17970	0.0806113	Ctnnb1/Ep300/Morc2a/Gm33950/Nos1/Bcl6/Ddx11/Terf1/Mtf2/Cct4/Tnks/Resf1/Chtop/Dnmt3b/Sgo2a/Mecp2
GO:0060429	epithelium development	88/1687	810/17970	0.0809286	Nkx6-3/Pdx1/Wnt5a/Kcnq1/Cldn3/Ctnnb1/Arg2/Lrp4/Mmp2/Eppk1/Tbx2/Bmp4/Lamb2/Fkbpl/Ccn1/Inhba/Exph5/Adm/Aldh1a1/Nrarp/Luzp1/Sh3bp1/Lama1/Ror2/Atoh8/Bmal1/Casp8/Map3k7/Spry2/Ep300/Reg3a/Chd7/Jhy/Pitx2/Tcf15/Cdkn1b/Yipf6/Arid4a/Elf3/Col15a1/Cdkn1c/Prlr/Wnt9b/Sapcd2/Cpt1a/Gorab/Krt10/Sec24b/Smad9/Stra6/Tigar/Sox8/Hnf1b/Snora73b/Mgp/Epha2/Gm2788/Wdpcp/Dnaaf1/Lgr4/Gm31597/Ophn1/Cul7/Grem1/Ttbk2/F2rl1/Pgf…
GO:0006109	regulation of carbohydrate metabolic process	18/1687	135/17970	0.0812201	Mtch2/Pgam1/Smpd3/Gm46840/Dgkq/Ep300/Prkn/Ppp1cb/Fam3a/Ppp1r3d/Tigar/Sesn2/Gpd1/Gper1/Ptger4/Pask/Epm2aip1/Supt20
GO:0042176	regulation of protein catabolic process	31/1687	255/17970	0.08158	Edem1/Wnt5a/Aurka/Cul4a/Dda1/Abca2/Ppp2ca/Bmal1/Gm9836/Dtl/Caml/Cdkn1b/Prkn/Csnk2a1-ps3/Serpinb1a/Uchl5/Wac/Mylip/Sh3rf2/Tnfaip3/Marchf7/Styx/Ubqln2/Ophn1/Laptm4b/Edem2/F8a/Pacsin3/Cblb/Timp1/Rnft1
GO:0002281	macrophage activation involved in immune response	4/1687	18/17970	0.0817254	Dysf/Lman2l/Ifi35/Fer1l5
GO:0006312	mitotic recombination	4/1687	18/17970	0.0817254	Gm33950/Smc6/Rad52/Xrcc3
GO:0030318	melanocyte differentiation	4/1687	18/17970	0.0817254	Hps4/Hps6/Bloc1s6/Lrmda
GO:0030539	male genitalia development	4/1687	18/17970	0.0817254	Ctnnb1/Ror2/Wnt9b/Lgr4
GO:0048011	neurotrophin TRK receptor signaling pathway	4/1687	18/17970	0.0817254	Cyfip1/Spry2/Sort1/Zfyve27
GO:0051654	establishment of mitochondrion localization	4/1687	18/17970	0.0817254	Myo19/Spast/Mapt/Rhot1
GO:0052652	cyclic purine nucleotide metabolic process	4/1687	18/17970	0.0817254	Adcy6/Gucy1a1/Adcy4/Adcy1
GO:0060218	hematopoietic stem cell differentiation	4/1687	18/17970	0.0817254	Batf/Tcf15/Ythdf2/Foxc1
GO:0060441	epithelial tube branching involved in lung morphogenesis	4/1687	18/17970	0.0817254	Ctnnb1/Bmp4/Lama1/Spry2
GO:0060456	positive regulation of digestive system process	4/1687	18/17970	0.0817254	Kcnq1/Lpcat3/Tac1/Pawr
GO:0060571	morphogenesis of an epithelial fold	4/1687	18/17970	0.0817254	Wnt5a/Ctnnb1/Bmp4/Luzp1
GO:1902547	regulation of cellular response to vascular endothelial growth factor stimulus	4/1687	18/17970	0.0817254	Dcn/Adgra2/Spry2/Smoc2
GO:0060249	anatomical structure homeostasis	33/1687	274/17970	0.0820568	Gaa/Ctc1/Ctnnb1/Slc28a2/Aldh1a1/Ccdc154/Gpr55/Tyro3/Zbtb48/Prkn/Iqcb1/Gm33950/Smc6/Ercc6/Terf1/Cct4/Il20rb/Abca3/Tnks/Ccne2/Wdr36/Ptger4/Atm/Foxc1/Xrcc3/Slc28a2b/Dcp2/Pif1/Cav3/Sash3/Nos3/Cep290/Terf2ip
GO:0030890	positive regulation of B cell proliferation	6/1687	33/17970	0.0837305	Cd320/Peli1/Bcl6/Ada/Atad5/Sash3
GO:0034198	cellular response to amino acid starvation	6/1687	33/17970	0.0837305	Kptn/Sesn3/Slc38a2/Sesn2/Mios/Dapl1
GO:0043462	regulation of ATPase activity	6/1687	33/17970	0.0837305	Dnajc10/Ltf/Myl4/Chtop/Tnnt3/Atpif1
GO:0045581	negative regulation of T cell differentiation	6/1687	33/17970	0.0837305	Zc3h12a/Bmp4/Nrarp/Bcl6/Zfp608/Fgl2
GO:0050856	regulation of T cell receptor signaling pathway	6/1687	33/17970	0.0837305	Slc30a7/Pawr/Btnl2/Ada/Ikbkg/Cblb
GO:0051294	establishment of spindle orientation	6/1687	33/17970	0.0837305	Dynlt1c/Cenpa/Spry2/Sapcd2/Spdl1/2700099C18Rik
GO:0051646	mitochondrion localization	6/1687	33/17970	0.0837305	Prkn/Zbed3/Myo19/Spast/Mapt/Rhot1
GO:0060964	regulation of gene silencing by miRNA	6/1687	33/17970	0.0837305	Zc3h12a/Wtip/Bmp4/Myocd/Bcdin3d/Mecp2
GO:0070232	regulation of T cell apoptotic process	6/1687	33/17970	0.0837305	Wnt5a/Arg2/Bmp4/Casp8/Cd27/Ada
GO:1901998	toxin transport	6/1687	33/17970	0.0837305	Hspa5/Copb2/Cct4/Adam10/Casp1/Dnaja1
GO:0043009	chordate embryonic development	60/1687	535/17970	0.0838453	Cpt2/Krt19/Wnt5a/Tab1/Ctnnb1/Ubr3/Fgf9/Bmp4/Cul4a/Ccn1/Bnip2/Adm/Gm16023/Eno1b/Nrarp/Luzp1/Ror2/Casp8/Map3k7/Hoxb3/Ep300/Chd7/Pitx2/Slc30a1/Tcf15/Elf3/Slc39a3/Cdkn1c/Wnt9b/Uspl1/Gorab/Gm47324/Sec24b/Dnaaf2/Sox8/1700034H15Rik/Hnf1b/Etl4/Snora73b/Epha2/Gm2788/Txnrd3/Tent5c/Ttbk2/Nsrp1/Ada/Adam10/Atp6ap2/Chtop/9130008F23Rik/Foxc1/C6/Cmtm3/Zfp420/Megf8/Tgfbr1/Nos3/Syna/Cdk20/Zeb1
GO:0031623	receptor internalization	11/1687	74/17970	0.0839181	Adm/Mtmr2/Lmbrd1/Rab5a/Ubqln2/Ophn1/Grem1/Calcrl/Rspo1/Sh3gl2/Ankrd13b
GO:0006605	protein targeting	26/1687	209/17970	0.0842053	Tomm20/Hspa5/Edem1/Syngr1/Kcnb1/Hps4/Srp54c/Timm9/Ywhab/Lonp2/Timm17b/Gm30251/Tram1/Gm16261/Samm50/Bnip3l-ps/Ssr3/Gm46350/Mief1/Zfyve16/Sgtb/Sort1/Srp54a/Hspa1l/Gphn/Pex1
GO:0000271	polysaccharide biosynthetic process	8/1687	49/17970	0.0844175	Smpd3/Gyg/Ppp1cb/Per2/Ppp1r3d/Ptger4/Pask/Epm2aip1
GO:0070252	actin-mediated cell contraction	8/1687	49/17970	0.0844175	Parva/Kcnq1/Rangrf/Pkp2/Nos1/Limch1/Kcne3/Dsp
GO:0097755	positive regulation of blood vessel diameter	8/1687	49/17970	0.0844175	Mmp2/Adm/Gucy1a1/Adrb3/Arhgap42/Nos1/F2rl1/Gper1
GO:1901796	regulation of signal transduction by p53 class mediator	8/1687	49/17970	0.0844175	Nop2/Rnf34/Smyd2/Prkn/Ell3/Marchf7/Spred1/Atad5
GO:1903201	regulation of oxidative stress-induced cell death	8/1687	49/17970	0.0844175	Ctnnb1/Ppia/Pawr/Vnn1/Prkn/Meak7/Rnf146/Ncoa7
GO:0072175	epithelial tube formation	15/1687	109/17970	0.0849534	Wnt5a/Ctnnb1/Bmp4/Adm/Luzp1/Casp8/Map3k7/Wnt9b/Sec24b/Sox8/Hnf1b/Snora73b/Grem1/Cep290/Cdk20
GO:0031670	cellular response to nutrient	7/1687	41/17970	0.085005	Pdia3/Mn1/Prkn/Amigo1/Pdxp/Postn/Tnks
GO:0046902	regulation of mitochondrial membrane permeability	7/1687	41/17970	0.085005	Mtch2/Zfp13/Chchd10/Bnip3l-ps/Eya2/Rhot1/Gm20604
GO:0032535	regulation of cellular component size	33/1687	275/17970	0.0852208	Tmsb4x/Wnt5a/Cyfip1/Tmod3/Sh3bp1/Eps8/Ep300/Sema6c/Ppp1r9a/Sptbn2/Pdxp/Fstl4/Aatk/Draxin/Pex11b/Map3k13/Mapt/Rab5a/Capza2/Gm46764/Wdr36/Slc12a6/F2rl1/Adnp/Plekhh2/Avil/Abitram/Wasl/Alox15/Dpysl2/Megf8/Actr3/Zfyve27
GO:0043066	negative regulation of apoptotic process	79/1687	723/17970	0.0853935	Lamtor5/Hspa5/Pdx1/Wnt5a/Tmbim4/Rnf34/Ctnnb1/Ddx3x/Arg2/Zc3h12a/Aurka/Ppia/Ltf/Bmp4/Myocd/Ccn1/Slc30a10/Arf4/Pik3cg/Naip1/Kifap3/Birc5/Nuak2/Cth/Map3k7/Tyro3/Nes/Spry2/Vnn1/Ep300/Hspb6/Ifit3/Nat8/Cdkn1b/Nr4a1/Prkn/Capn13/Prlr/Pcp4/Nos1/Meis3/Ell3/Csnk2a1-ps3/Ier3/Bcl6/Draxin/Bnip3l-ps/Il18/Sox8/Sgk3/Hnf1b/Eya2/Wfs1/Faim2/Cd27/Sh3rf2/Tnfaip3/Yme1l1/Marchf7/Grem1/Ada/Adnp/Card14/Usp47/Foxc1/Prkch/T…
GO:0006643	membrane lipid metabolic process	19/1687	145/17970	0.0855889	Elovl6/Smpd3/Hacd2/Pgap3/Pgap2/Pigv/Degs1/Ccn1/Abca2/Pyurf/Gbgt1/Pigg/Pigl/Cers6/Elovl5/Mgst2/Fut7/B4galnt1/Serinc2
GO:0051216	cartilage development	18/1687	136/17970	0.0857976	Smpd3/Wnt5a/Ctnnb1/Fgf9/Bmp4/Ccn1/Ror2/Mboat2/Bmp3/Hoxb3/Ep300/Smad9/Mgp/Grem1/Tapt1/Tgfbr1/Timp1/Zeb1
GO:0001508	action potential	12/1687	83/17970	0.0864729	Ywhah/Kcnq1/Kcnb1/Tac1/Rangrf/Pawr/Pkp2/Kcnmb3/Kcne3/Gper1/Rapgef4/Dsp
GO:0110020	regulation of actomyosin structure organization	12/1687	83/17970	0.0864729	Ppm1f/Tac1/Ep300/Ppp1r9a/Gm52861/Sh3pxd2b/Arhgap6/Limch1/Ptger4/Gm40363/Gm53330/Tgfbr1
GO:0031098	stress-activated protein kinase signaling cascade	22/1687	173/17970	0.0881447	Wnt5a/Zc3h12a/Ppia/Ror2/Map3k21/Unc5cl/Traf3/Map3k7/Mid1/Prkn/Nbr1/Mturn/Ercc6/Map3k13/Cd27/Sh3rf2/F2rl1/Map3k20/Rell2/Ptger4/Sirpa/Dnaja1
GO:0070997	neuron death	31/1687	257/17970	0.0882113	Hspa5/Wnt5a/Egr1/Ctnnb1/Kcnb1/Tac1/Slc30a10/Kmo/Birc5/Casp8/Pawr/Tyro3/Nes/Elk1/Prkn/Meak7/Pcp4/Nos1/Aatk/Draxin/Il18/Tigar/Mapt/Nqo2/Wfs1/Faim2/Slc23a2/Adnp/Ncoa7/Mecp2/Star
GO:0009792	embryo development ending in birth or egg hatching	61/1687	547/17970	0.088882	Cpt2/Krt19/Wnt5a/Tab1/Ctnnb1/Ubr3/Fgf9/Bmp4/Cul4a/Ccn1/Bnip2/Adm/Gm16023/Eno1b/Nrarp/Luzp1/Ror2/Casp8/Map3k7/Hoxb3/Ep300/Chd7/Pitx2/Slc30a1/Tcf15/Elf3/Slc39a3/Cdkn1c/Wnt9b/Uspl1/Gorab/Gm47324/Sec24b/Dnaaf2/Sox8/1700034H15Rik/Hnf1b/Etl4/Snora73b/Epha2/Gm2788/Txnrd3/Tent5c/Ttbk2/Nsrp1/Ada/Adam10/Atp6ap2/Chtop/9130008F23Rik/Abcg2/Foxc1/C6/Cmtm3/Zfp420/Megf8/Tgfbr1/Nos3/Syna/Cdk20/Zeb1
GO:0071902	positive regulation of protein serine/threonine kinase activity	21/1687	164/17970	0.0889376	Ccnd1/Wnt5a/Tab1/Ppia/Ltf/Bmp4/Pik3cg/Ppp2ca/Ror2/Map3k21/Avpi1/Map3k7/Cdkn1b/Slc27a1/Irgm2/Map3k13/Pik3r5/Map3k20/Pik3r6/Tgfbr1/Tgfa
GO:2000116	regulation of cysteine-type endopeptidase activity	21/1687	164/17970	0.0889376	Mtch2/Lamtor5/Rnf34/Ddx3x/Ppm1f/Ltf/Ccn1/Naip1/Ppp2ca/Birc5/Casp8/Pawr/Ep300/Nr4a1/Csnk2a1-ps3/Casp8ap2/Tnfrsf10b/Gper1/Usp47/Casp1/Gramd4
GO:0007266	Rho protein signal transduction	14/1687	101/17970	0.089507	Stard8/Gpr55/Gpr20/Adgrg1/Arhgap32/Arhgap42/Bcl6/F2rl2/Snora73b/Cdh13/Ophn1/F2rl1/Ctnnal1/Gpr4
GO:0034612	response to tumor necrosis factor	20/1687	155/17970	0.0896181	Smpd3/Zc3h12a/Nmnat3/Casp8/Traf3/Ccl8/Prkn/Zfp36l2/Ccl20/Ccl9/H2bc21/Ccl22/Postn/Gpd1/Adam10/F2rl1/Gper1/Card14/Casp1/Ocln
GO:0050807	regulation of synapse organization	20/1687	155/17970	0.0896181	Wnt5a/Lrp4/Cyfip1/Arf4/Nrp2/Ppp1r9a/Sipa1l1/Amigo1/Ephb3/Lrfn4/Vstm5/Lrrc4b/Setd5/Adam10/Adnp/Rapgef4/Srcin1/Abhd17b/Slitrk4/Mecp2
GO:0003281	ventricular septum development	9/1687	58/17970	0.090196	Wnt5a/Bmp4/Ccn1/Luzp1/Ltbp1/Pitx2/Stra6/Tgfbr1/Nos3
GO:0030641	regulation of cellular pH	9/1687	58/17970	0.090196	Slc26a6/Tmem106b/Slc4a3/Slc26a3/Slc9a5/Tmem165/Atp5b/Tmem199/Atp6ap2
GO:0009116	nucleoside metabolic process	11/1687	75/17970	0.0904293	Nudt1/Nme6/Macrod1/Entpd4/Gtpbp1/Entpd4b/Nt5e/Nme7/Upb1/Dck/Ada
GO:0014812	muscle cell migration	11/1687	75/17970	0.0904293	Tmsb4x/Parva/Egr1/Gm12854/Fgf9/Myocd/Il18/Rab5a/Postn/Ptger4/Rapgef4
GO:0051492	regulation of stress fiber assembly	11/1687	75/17970	0.0904293	Ppm1f/Tac1/Ppp1r9a/Gm52861/Sh3pxd2b/Arhgap6/Limch1/Ptger4/Gm40363/Gm53330/Tgfbr1
GO:0050806	positive regulation of synaptic transmission	16/1687	119/17970	0.0906404	Rims2/Grin2d/Igsf9b/Tac1/Kmo/Ror2/Ppp1r9a/Nos1/Gip/Nptn/Gper1/Ptger4/Adcy1/Cyp46a1/Unc13b/Mecp2
GO:0007254	JNK cascade	17/1687	128/17970	0.090714	Wnt5a/Ror2/Map3k21/Unc5cl/Traf3/Map3k7/Prkn/Mturn/Ercc6/Map3k13/Cd27/Sh3rf2/F2rl1/Map3k20/Ptger4/Sirpa/Dnaja1
GO:0099003	vesicle-mediated transport in synapse	17/1687	128/17970	0.090714	Ctnnb1/Cyfip1/Bltp1/Rims2/Dgkq/Syp/Sptbn2/Pld1/Rab5a/Ophn1/Rapgef4/Adcy1/Gm31336/Cadps2/Sv2a/Sh3gl2/Unc13b
GO:0003009	skeletal muscle contraction	5/1687	26/17970	0.0907997	Gaa/Nr4a1/Tnnt3/Tnni2/Tnni1
GO:0007007	inner mitochondrial membrane organization	5/1687	26/17970	0.0907997	Timm9/Chchd10/Samm50/Adck1/Immt
GO:0009167	purine ribonucleoside monophosphate metabolic process	5/1687	26/17970	0.0907997	Ampd2/Nt5e/Adss/Ampd3/Ada
GO:0010463	mesenchymal cell proliferation	5/1687	26/17970	0.0907997	Wnt5a/Ctnnb1/Fgf9/Bmp4/Zeb1
GO:0040019	positive regulation of embryonic development	5/1687	26/17970	0.0907997	Hspa5/Ctnnb1/Rbm19/Zbed3/Gorab
GO:0032868	response to insulin	23/1687	183/17970	0.0913655	Slc2a4/Egr1/Kcnq1/Cyfip1/Sesn3/Adm/Ppp2ca/Trim72/Slc27a1/Fads1/Meak7/Zbed3/Sesn2/Slc25a33/Nucb2/Abcg2/Fut7/Sort1/Egr2/Otc/Epm2aip1/Dennd4c/Star
GO:0000079	regulation of cyclin-dependent protein serine/threonine kinase activity	8/1687	50/17970	0.0926549	Ccnd1/Ccni/Myocd/Hexim2/Cdkn1b/Cdkn1c/Tnfaip3/Ccne2
GO:0000187	activation of MAPK activity	8/1687	50/17970	0.0926549	Wnt5a/Ppia/Map3k21/Avpi1/Map3k7/Map3k13/Map3k20/Tgfa
GO:0006661	phosphatidylinositol biosynthetic process	8/1687	50/17970	0.0926549	Pgap3/Pgap2/Pigv/Pik3cg/Pyurf/Slc27a1/Pigg/Pigl
GO:0061333	renal tubule morphogenesis	8/1687	50/17970	0.0926549	Ctnnb1/Bmp4/Wnt9b/Sox8/Hnf1b/Lgr4/Grem1/Pgf
GO:0072078	nephron tubule morphogenesis	8/1687	50/17970	0.0926549	Ctnnb1/Bmp4/Wnt9b/Sox8/Hnf1b/Lgr4/Grem1/Pgf
GO:0006631	fatty acid metabolic process	38/1687	325/17970	0.0926853	Cpt2/Elovl6/Cyp4f40/Hacd2/Acot7/Mecr/Tysnd1/Degs1/Echdc1/Lypla1/Gnpat/Acadsb/Lonp2/Nudt7/Cyp2t4/Hpgd/Slc27a1/Hadhb/Fads1/Ndufs6b/Gip/Cpt1a/4833422C13Rik/Per2/Ehhadh/Elovl5/Amacr/Acot4/Erlin1/Peds1/Edn2/Sesn2/Cyp4f18/Nucb2/Hacd1/Lpin1/Acot2/Alox15
GO:0001676	long-chain fatty acid metabolic process	12/1687	84/17970	0.0927139	Cpt2/Elovl6/Cyp4f40/Acot7/Cyp2t4/Slc27a1/Fads1/Cpt1a/Acot4/Cyp4f18/Acot2/Alox15
GO:0051225	spindle assembly	12/1687	84/17970	0.0927139	Poldip2/Aurka/Tubgcp4/Rnf4/Haus2/Prc1/Togaram1/Mzt1/Tnks/2700099C18Rik/Togaram2/Spice1
GO:1903362	regulation of cellular protein catabolic process	21/1687	165/17970	0.0933372	Edem1/Aurka/Dda1/Abca2/Gm9836/Caml/Prkn/Csnk2a1-ps3/Uchl5/Wac/Mylip/Sh3rf2/Tnfaip3/Marchf7/Styx/Ubqln2/Ophn1/Laptm4b/Edem2/F8a/Rnft1
GO:0000294	nuclear-transcribed mRNA catabolic process, endonucleolytic cleavage-dependent decay	1/1687	1/17970	0.0938787	Zc3h12a
GO:0001680	tRNA 3'-terminal CCA addition	1/1687	1/17970	0.0938787	Trnt1
GO:0001966	thigmotaxis	1/1687	1/17970	0.0938787	Ep300
GO:0001970	positive regulation of activation of membrane attack complex	1/1687	1/17970	0.0938787	C6
GO:0002041	intussusceptive angiogenesis	1/1687	1/17970	0.0938787	Ccn1
GO:0002174	mammary stem cell proliferation	1/1687	1/17970	0.0938787	Lbh
GO:0002472	macrophage antigen processing and presentation	1/1687	1/17970	0.0938787	Fgl2
GO:0002616	regulation of macrophage antigen processing and presentation	1/1687	1/17970	0.0938787	Fgl2
GO:0002617	negative regulation of macrophage antigen processing and presentation	1/1687	1/17970	0.0938787	Fgl2
GO:0002631	regulation of granuloma formation	1/1687	1/17970	0.0938787	Tnfaip3
GO:0002632	negative regulation of granuloma formation	1/1687	1/17970	0.0938787	Tnfaip3
GO:0002926	tRNA wobble base 5-methoxycarbonylmethyl-2-thiouridinylation	1/1687	1/17970	0.0938787	Elp1
GO:0002941	synoviocyte proliferation	1/1687	1/17970	0.0938787	Saal1
GO:0003104	positive regulation of glomerular filtration	1/1687	1/17970	0.0938787	F2rl1
GO:0003226	right ventricular compact myocardium morphogenesis	1/1687	1/17970	0.0938787	Chd7
GO:0006127	glycerophosphate shuttle	1/1687	1/17970	0.0938787	Gpd1
GO:0006157	deoxyadenosine catabolic process	1/1687	1/17970	0.0938787	Ada
GO:0006193	ITP catabolic process	1/1687	1/17970	0.0938787	Itpa
GO:0006392	transcription elongation from mitochondrial promoter	1/1687	1/17970	0.0938787	Tefm
GO:0006452	translational frameshifting	1/1687	1/17970	0.0938787	Shfl
GO:0006535	cysteine biosynthetic process from serine	1/1687	1/17970	0.0938787	Cbs
GO:0006593	ornithine catabolic process	1/1687	1/17970	0.0938787	Otc
GO:0006713	glucocorticoid catabolic process	1/1687	1/17970	0.0938787	Ywhah
GO:0006864	pyrimidine nucleotide transport	1/1687	1/17970	0.0938787	Slc25a33
GO:0006982	response to lipid hydroperoxide	1/1687	1/17970	0.0938787	Mgst1
GO:0007500	mesodermal cell fate determination	1/1687	1/17970	0.0938787	Bmp4
GO:0007521	muscle cell fate determination	1/1687	1/17970	0.0938787	Tbx2
GO:0009051	pentose-phosphate shunt, oxidative branch	1/1687	1/17970	0.0938787	H6pd
GO:0009207	purine ribonucleoside triphosphate catabolic process	1/1687	1/17970	0.0938787	Itpa
GO:0009305	protein biotinylation	1/1687	1/17970	0.0938787	Hlcs
GO:0010157	response to chlorate	1/1687	1/17970	0.0938787	Pdx1
GO:0010501	RNA secondary structure unwinding	1/1687	1/17970	0.0938787	Ddx3x
GO:0010808	positive regulation of synaptic vesicle priming	1/1687	1/17970	0.0938787	Unc13b
GO:0014806	smooth muscle hyperplasia	1/1687	1/17970	0.0938787	Nos3
GO:0014860	neurotransmitter secretion involved in regulation of skeletal muscle contraction	1/1687	1/17970	0.0938787	Nr4a1
GO:0015675	nickel cation transport	1/1687	1/17970	0.0938787	Mmgt2
GO:0015680	protein maturation by copper ion transfer	1/1687	1/17970	0.0938787	Atp7b
GO:0015724	formate transport	1/1687	1/17970	0.0938787	Slc26a6
GO:0015730	propanoate transport	1/1687	1/17970	0.0938787	Slc5a8
GO:0015774	polysaccharide transport	1/1687	1/17970	0.0938787	Smpd3
GO:0015797	mannitol transport	1/1687	1/17970	0.0938787	Slc26a6
GO:0015798	myo-inositol transport	1/1687	1/17970	0.0938787	Slc5a3
GO:0015805	S-adenosyl-L-methionine transport	1/1687	1/17970	0.0938787	Slc25a26
GO:0015912	short-chain fatty acid transport	1/1687	1/17970	0.0938787	Slc5a8
GO:0015913	short-chain fatty acid import	1/1687	1/17970	0.0938787	Slc5a8
GO:0016128	phytosteroid metabolic process	1/1687	1/17970	0.0938787	Dhcr7
GO:0016129	phytosteroid biosynthetic process	1/1687	1/17970	0.0938787	Dhcr7
GO:0016131	brassinosteroid metabolic process	1/1687	1/17970	0.0938787	Dhcr7
GO:0016132	brassinosteroid biosynthetic process	1/1687	1/17970	0.0938787	Dhcr7
GO:0018003	peptidyl-lysine N6-acetylation	1/1687	1/17970	0.0938787	Nat8
GO:0018142	protein-DNA covalent cross-linking	1/1687	1/17970	0.0938787	Hmces
GO:0018143	nucleic acid-protein covalent cross-linking	1/1687	1/17970	0.0938787	Hmces
GO:0018272	protein-pyridoxal-5-phosphate linkage via peptidyl-N6-pyridoxal phosphate-L-lysine	1/1687	1/17970	0.0938787	Cth
GO:0018315	molybdenum incorporation into molybdenum-molybdopterin complex	1/1687	1/17970	0.0938787	Gphn
GO:0018352	protein-pyridoxal-5-phosphate linkage	1/1687	1/17970	0.0938787	Cth
GO:0018400	peptidyl-proline hydroxylation to 3-hydroxy-L-proline	1/1687	1/17970	0.0938787	Crtap
GO:0018963	phthalate metabolic process	1/1687	1/17970	0.0938787	Star
GO:0019343	cysteine biosynthetic process via cystathionine	1/1687	1/17970	0.0938787	Cth
GO:0019442	tryptophan catabolic process to acetyl-CoA	1/1687	1/17970	0.0938787	Kynu
GO:0019988	charged-tRNA amino acid modification	1/1687	1/17970	0.0938787	Mtfmt
GO:0021503	neural fold bending	1/1687	1/17970	0.0938787	Luzp1
GO:0021528	commissural neuron differentiation in spinal cord	1/1687	1/17970	0.0938787	Draxin
GO:0021593	rhombomere morphogenesis	1/1687	1/17970	0.0938787	Egr2
GO:0021594	rhombomere formation	1/1687	1/17970	0.0938787	Egr2
GO:0021595	rhombomere structural organization	1/1687	1/17970	0.0938787	Egr2
GO:0021658	rhombomere 3 morphogenesis	1/1687	1/17970	0.0938787	Egr2
GO:0021659	rhombomere 3 structural organization	1/1687	1/17970	0.0938787	Egr2
GO:0021660	rhombomere 3 formation	1/1687	1/17970	0.0938787	Egr2
GO:0021664	rhombomere 5 morphogenesis	1/1687	1/17970	0.0938787	Egr2
GO:0021665	rhombomere 5 structural organization	1/1687	1/17970	0.0938787	Egr2
GO:0021666	rhombomere 5 formation	1/1687	1/17970	0.0938787	Egr2
GO:0021747	cochlear nucleus development	1/1687	1/17970	0.0938787	Sec24b
GO:0021763	subthalamic nucleus development	1/1687	1/17970	0.0938787	Pitx2
GO:0021812	neuronal-glial interaction involved in cerebral cortex radial glia guided migration	1/1687	1/17970	0.0938787	Dab1
GO:0021813	cell-cell adhesion involved in neuronal-glial interactions involved in cerebral cortex radial glia guided migration	1/1687	1/17970	0.0938787	Dab1
GO:0030264	nuclear fragmentation involved in apoptotic nuclear change	1/1687	1/17970	0.0938787	Gper1
GO:0030392	fructosamine catabolic process	1/1687	1/17970	0.0938787	Aldh1a1
GO:0030538	embryonic genitalia morphogenesis	1/1687	1/17970	0.0938787	Ror2
GO:0030842	regulation of intermediate filament depolymerization	1/1687	1/17970	0.0938787	Nes
GO:0030844	positive regulation of intermediate filament depolymerization	1/1687	1/17970	0.0938787	Nes
GO:0031247	actin rod assembly	1/1687	1/17970	0.0938787	Pdxp
GO:0031291	Ran protein signal transduction	1/1687	1/17970	0.0938787	Rangrf
GO:0031460	glycine betaine transport	1/1687	1/17970	0.0938787	Slc38a2
GO:0032077	positive regulation of deoxyribonuclease activity	1/1687	1/17970	0.0938787	Ddx11
GO:0032079	positive regulation of endodeoxyribonuclease activity	1/1687	1/17970	0.0938787	Ddx11
GO:0032361	pyridoxal phosphate catabolic process	1/1687	1/17970	0.0938787	Pdxp
GO:0032378	negative regulation of intracellular lipid transport	1/1687	1/17970	0.0938787	Abca2
GO:0032381	negative regulation of intracellular sterol transport	1/1687	1/17970	0.0938787	Abca2
GO:0032384	negative regulation of intracellular cholesterol transport	1/1687	1/17970	0.0938787	Abca2
GO:0032468	Golgi calcium ion homeostasis	1/1687	1/17970	0.0938787	Tmem165
GO:0032472	Golgi calcium ion transport	1/1687	1/17970	0.0938787	Tmem165
GO:0033388	putrescine biosynthetic process from arginine	1/1687	1/17970	0.0938787	Agmat
GO:0033389	putrescine biosynthetic process from arginine, using agmatinase	1/1687	1/17970	0.0938787	Agmat
GO:0033396	beta-alanine biosynthetic process via 3-ureidopropionate	1/1687	1/17970	0.0938787	Upb1
GO:0034090	maintenance of meiotic sister chromatid cohesion	1/1687	1/17970	0.0938787	Sgo2a
GO:0034094	regulation of maintenance of meiotic sister chromatid cohesion	1/1687	1/17970	0.0938787	Sgo2a
GO:0034096	positive regulation of maintenance of meiotic sister chromatid cohesion	1/1687	1/17970	0.0938787	Sgo2a
GO:0034147	regulation of toll-like receptor 5 signaling pathway	1/1687	1/17970	0.0938787	Tnfaip3
GO:0034148	negative regulation of toll-like receptor 5 signaling pathway	1/1687	1/17970	0.0938787	Tnfaip3
GO:0034402	recruitment of 3'-end processing factors to RNA polymerase II holoenzyme complex	1/1687	1/17970	0.0938787	Polr2d
GO:0034640	establishment of mitochondrion localization by microtubule attachment	1/1687	1/17970	0.0938787	Rhot1
GO:0034642	mitochondrion migration along actin filament	1/1687	1/17970	0.0938787	Myo19
GO:0035103	sterol regulatory element binding protein cleavage	1/1687	1/17970	0.0938787	Lpcat3
GO:0035340	inosine transport	1/1687	1/17970	0.0938787	Slc28a2
GO:0035565	regulation of pronephros size	1/1687	1/17970	0.0938787	Hnf1b
GO:0035875	maintenance of meiotic sister chromatid cohesion, centromeric	1/1687	1/17970	0.0938787	Sgo2a
GO:0036116	long-chain fatty-acyl-CoA catabolic process	1/1687	1/17970	0.0938787	Acot7
GO:0036146	cellular response to mycotoxin	1/1687	1/17970	0.0938787	Egr1
GO:0036161	calcitonin secretion	1/1687	1/17970	0.0938787	Ptger4
GO:0036268	swimming	1/1687	1/17970	0.0938787	Ep300
GO:0036298	recombinational interstrand cross-link repair	1/1687	1/17970	0.0938787	Mcm8
GO:0036415	regulation of tRNA stability	1/1687	1/17970	0.0938787	Trdmt1
GO:0036416	tRNA stabilization	1/1687	1/17970	0.0938787	Trdmt1
GO:0036500	ATF6-mediated unfolded protein response	1/1687	1/17970	0.0938787	Wfs1
GO:0036510	trimming of terminal mannose on C branch	1/1687	1/17970	0.0938787	Edem1
GO:0036517	chemoattraction of serotonergic neuron axon	1/1687	1/17970	0.0938787	Wnt5a
GO:0038158	granulocyte colony-stimulating factor signaling pathway	1/1687	1/17970	0.0938787	Jagn1
GO:0042040	metal incorporation into metallo-molybdopterin complex	1/1687	1/17970	0.0938787	Gphn
GO:0042323	negative regulation of circadian sleep/wake cycle, non-REM sleep	1/1687	1/17970	0.0938787	Ada
GO:0042465	kinesis	1/1687	1/17970	0.0938787	Ptger4
GO:0042466	chemokinesis	1/1687	1/17970	0.0938787	Ptger4
GO:0042820	vitamin B6 catabolic process	1/1687	1/17970	0.0938787	Pdxp
GO:0042843	D-xylose catabolic process	1/1687	1/17970	0.0938787	Dhdh
GO:0043048	dolichyl monophosphate biosynthetic process	1/1687	1/17970	0.0938787	Dolk
GO:0043095	regulation of GTP cyclohydrolase I activity	1/1687	1/17970	0.0938787	Gchfr
GO:0043105	negative regulation of GTP cyclohydrolase I activity	1/1687	1/17970	0.0938787	Gchfr
GO:0043181	vacuolar sequestering	1/1687	1/17970	0.0938787	Gaa
GO:0043251	sodium-dependent organic anion transport	1/1687	1/17970	0.0938787	Slc10a6
GO:0043381	negative regulation of memory T cell differentiation	1/1687	1/17970	0.0938787	Fgl2
GO:0043585	nose morphogenesis	1/1687	1/17970	0.0938787	Stra6
GO:0044334	canonical Wnt signaling pathway involved in positive regulation of epithelial to mesenchymal transition	1/1687	1/17970	0.0938787	Ctnnb1
GO:0044379	protein localization to actin cortical patch	1/1687	1/17970	0.0938787	Ppp1r9b
GO:0044524	protein sulfhydration	1/1687	1/17970	0.0938787	Cth
GO:0044537	regulation of circulating fibrinogen levels	1/1687	1/17970	0.0938787	Proc
GO:0045106	intermediate filament depolymerization	1/1687	1/17970	0.0938787	Nes
GO:0045108	regulation of intermediate filament polymerization or depolymerization	1/1687	1/17970	0.0938787	Nes
GO:0045976	negative regulation of mitotic cell cycle, embryonic	1/1687	1/17970	0.0938787	Ctnnb1
GO:0046041	ITP metabolic process	1/1687	1/17970	0.0938787	Itpa
GO:0046061	dATP catabolic process	1/1687	1/17970	0.0938787	Ada
GO:0046086	adenosine biosynthetic process	1/1687	1/17970	0.0938787	Nt5e
GO:0046090	deoxyadenosine metabolic process	1/1687	1/17970	0.0938787	Ada
GO:0046092	deoxycytidine metabolic process	1/1687	1/17970	0.0938787	Dck
GO:0046111	xanthine biosynthetic process	1/1687	1/17970	0.0938787	Ada
GO:0046122	purine deoxyribonucleoside metabolic process	1/1687	1/17970	0.0938787	Ada

## Sheet: LAST VS CPG.BP(CC)
Table S6. Significantly Enriched upregulated and downregulated GO (CC) terms in LAST versus CPG group
ID	Description	GeneRatio	BgRatio	pvalue	geneID
GO:0031967	organelle envelope	137/1849	981/20331	2.08105e-07	Cpt2/Rtn4ip1/Mtch2/Agpat4/Tomm20/Phf8/Nudt1/Mtfp1/Cox7a1/Miga2/Snph/Gchfr/Coa6/Timm8b/Sord/Letmd1/Nxf1/Clcc1/Fpgs/Pom121/Mpc1/Degs1/Coq6/Lypla1/Gnpat/Nipsnap1/Bnip2/Ndufaf3/Sdha/Kmo/Sfxn2/Timm9/Armc1/Cenpf/Mgst1/Dnajc30/Chchd10/Maob/Pdia3/Nup205/Uqcrc1/Ndufab1/Timm17b/Gm46840/Exd2/Dtl/Cox6a1/Gm13570/Tyro3/P2rx6/Ndufs5-ps/Plpp7/Lyrm7/Gm30251/Nup160/Slc30a1/Ino80dos/Pcm1/Nr4a1/Prkn/Dhcr7/Hadhb/Nbr1…
GO:0031975	envelope	137/1849	982/20331	2.20826e-07	Cpt2/Rtn4ip1/Mtch2/Agpat4/Tomm20/Phf8/Nudt1/Mtfp1/Cox7a1/Miga2/Snph/Gchfr/Coa6/Timm8b/Sord/Letmd1/Nxf1/Clcc1/Fpgs/Pom121/Mpc1/Degs1/Coq6/Lypla1/Gnpat/Nipsnap1/Bnip2/Ndufaf3/Sdha/Kmo/Sfxn2/Timm9/Armc1/Cenpf/Mgst1/Dnajc30/Chchd10/Maob/Pdia3/Nup205/Uqcrc1/Ndufab1/Timm17b/Gm46840/Exd2/Dtl/Cox6a1/Gm13570/Tyro3/P2rx6/Ndufs5-ps/Plpp7/Lyrm7/Gm30251/Nup160/Slc30a1/Ino80dos/Pcm1/Nr4a1/Prkn/Dhcr7/Hadhb/Nbr1…
GO:0031966	mitochondrial membrane	90/1849	605/20331	2.04594e-06	Cpt2/Rtn4ip1/Mtch2/Agpat4/Tomm20/Mtfp1/Cox7a1/Miga2/Snph/Timm8b/Sord/Letmd1/Fpgs/Mpc1/Degs1/Coq6/Gnpat/Nipsnap1/Ndufaf3/Sdha/Kmo/Sfxn2/Timm9/Armc1/Mgst1/Dnajc30/Chchd10/Maob/Uqcrc1/Ndufab1/Timm17b/Gm46840/Exd2/Cox6a1/Gm13570/Ndufs5-ps/Lyrm7/Gm30251/Ino80dos/Prkn/Hadhb/COX2/Nos1/Ndufs6b/Samm50/Uqcrq/Adck1/Myo19/Ndufb9/Cpt1a/Gm6581/Atp5d/Dhrs13/Slc25a26/Bnip3l-ps/Wdr93/Tigar/Gm46350/Ldhd/Usp30/Atp5…
GO:0005740	mitochondrial envelope	96/1849	671/20331	5.16634e-06	Cpt2/Rtn4ip1/Mtch2/Agpat4/Tomm20/Mtfp1/Cox7a1/Miga2/Snph/Coa6/Timm8b/Sord/Letmd1/Fpgs/Mpc1/Degs1/Coq6/Gnpat/Nipsnap1/Ndufaf3/Sdha/Kmo/Sfxn2/Timm9/Armc1/Mgst1/Dnajc30/Chchd10/Maob/Pdia3/Uqcrc1/Ndufab1/Timm17b/Gm46840/Exd2/Cox6a1/Gm13570/Ndufs5-ps/Lyrm7/Gm30251/Ino80dos/Prkn/Hadhb/Nbr1/Gm8283/COX2/Nos1/Ndufs6b/Samm50/Uqcrq/Adck1/Myo19/Ndufb9/Cpt1a/Gm6581/Atp5d/Dhrs13/Slc25a26/Bnip3l-ps/Wdr93/Tigar/…
GO:0098803	respiratory chain complex	20/1849	84/20331	4.90427e-05	Cox7a1/Coa6/Uqcrc1/Ndufab1/Cox6a1/Ndufs5-ps/COX2/Ndufs6b/Uqcrq/Ndufb9/Wdr93/Ndufv3/Cox8b/Ndufa1/Gm6293/Uqcrb/Cox4i1/Cox5b/COX1/Ndufc1
GO:0005783	endoplasmic reticulum	119/1849	922/20331	5.42653e-05	Elovl6/Gdpd5/Agpat4/Hspa5/Edem1/Hacd2/Wnt5a/Rnf128/Kcnq1/Ces1e/Itga8/Zc3h12a/Cd320/Car4/Hgfac/Dnajc10/Reep2/Clcc1/Kcnb1/Lypla1/Rangrf/Rps24/Angel1/Mgst1/Duoxa2/Kifap3/Tmed3/Pdia3/Pomt1/Slc26a6/Hps6/Hrc/Lyz1/Ldah/Caml/Ccdc134/Plcb4/Slc30a1/Calr/Rab18/Nat8/Fgfr3/Prkn/Phtf1/Slc27a1/Dhcr7/Hadhb/Yipf6/Pigg/Pigl/Trappc1/Rnf145/Nos1/H6pd/Alg1/Tmem132a/Sec61a2/Spast/Fam8a1/Atp10a/G6pc3/Arhgap5/Sec24b/Bni…
GO:0005746	mitochondrial respirasome	19/1849	82/20331	0.000111012	Cox7a1/Uqcrc1/Ndufab1/Cox6a1/Ndufs5-ps/Ndufs6b/Uqcrq/Ndufb9/Wdr93/Ndufv3/Cox8b/Ndufa1/Gm6293/Uqcrb/Cox4i1/Gm34303/Cox5b/COX1/Ndufc1
GO:0016604	nuclear body	74/1849	533/20331	0.00015852	Pdx1/Tab1/Rnf34/Nxf1/Rnf32/Cwc22/Tut1/Myocd/Rfxap/Srp54c/Rbm19/Raph1/Atoh8/Mrpl36/Rnf4/Bmal1/Mrpl44/Frg1/Gm9836/Hexim2/Dgkq/Srsf10/Dennd1b/Zwint/Xrra1/Prkn/Mocs2/Nbr1/Klf11/Gm33950/Uspl1/Ell3/Isg20/Cbx2/Patl1/Smc6/Ccndbp1/Thap1/Ercc6/Bnip3l-ps/Pnisr/Adprs/Terf1/Wac/Mapt/Dock1/Dnaaf1/Tnks/Yme1l1/Nsl1/Rbm4/Psme4/Ss18l1/Toe1/Nsrp1/Wtap/Casp8ap2/Glis2/Chtop/Plekhh2/F8a/Surf2/Sarnp/Zc3h14/Abitram/Polr…
GO:0016607	nuclear speck	43/1849	268/20331	0.000176271	Pdx1/Tab1/Rnf34/Nxf1/Cwc22/Tut1/Myocd/Rfxap/Srp54c/Rbm19/Atoh8/Hexim2/Dgkq/Srsf10/Dennd1b/Prkn/Mocs2/Gm33950/Ell3/Cbx2/Patl1/Smc6/Bnip3l-ps/Pnisr/Wac/Mapt/Dock1/Dnaaf1/Nsl1/Rbm4/Psme4/Toe1/Nsrp1/Wtap/Glis2/Chtop/Surf2/Sarnp/Zc3h14/Abitram/Polr2d/Srp54a/Tbxa2r
GO:0005743	mitochondrial inner membrane	60/1849	420/20331	0.000301934	Cpt2/Mtch2/Mtfp1/Cox7a1/Timm8b/Letmd1/Fpgs/Mpc1/Coq6/Nipsnap1/Ndufaf3/Sdha/Kmo/Timm9/Mgst1/Dnajc30/Chchd10/Maob/Uqcrc1/Ndufab1/Timm17b/Gm46840/Cox6a1/Gm13570/Ndufs5-ps/Gm30251/Ino80dos/Hadhb/COX2/Ndufs6b/Samm50/Uqcrq/Adck1/Ndufb9/Cpt1a/Gm6581/Atp5d/Dhrs13/Slc25a26/Wdr93/Ldhd/Atp5b/Yme1l1/Ndufv3/Cox8b/Ndufa1/Immt/Slc25a33/Gm6293/Uqcrb/Cox4i1/Gm34303/Exog/Slc25a4/Otc/Cox5b/Sfxn3/COX1/Star/Ndufc1
GO:0000932	P-body	15/1849	62/20331	0.000346199	Zc3h12a/Wtip/Mex3a/Psma4/Shfl/Dcps/Patl1/Btbd1/Ythdf2/Ago4/Nbdy/Pnrc2/Polr2d/Dcp2/Ago1
GO:0042175	nuclear outer membrane-endoplasmic reticulum membrane network	102/1849	805/20331	0.000357552	Elovl6/Gdpd5/Agpat4/Hspa5/Edem1/Hacd2/Atg2b/Pomt2/Zc3h12a/Lpcat3/Reep2/Pigv/Pom121/Degs1/Emc4/Mgst1/Duoxa2/Tmed3/Mboat2/Pdia3/Dolk/Pyurf/Pomt1/Hrc/Tyro3/Plpp7/Caml/Arhgap32/Vma21/Ssr4/Nat8/Prkn/Phtf1/Dhcr7/Fads1/Pigg/Pigl/Myrfl/Rnf145/Gm16261/Nos1/Cybc1/Alg1/Tmem132a/Irgm2/Spcs2-ps/Rdh1/Rab9/Spast/Fam8a1/Atp10a/G6pc3/Spcs3/Cers6/Stimate/Slc37a3/Elovl5/Saraf/Ssr3/Erlin1/Lmbrd1/Tmem41b/Uchl1/Nus1/W…
GO:0005789	endoplasmic reticulum membrane	100/1849	787/20331	0.000368624	Elovl6/Gdpd5/Agpat4/Hspa5/Edem1/Hacd2/Atg2b/Pomt2/Zc3h12a/Lpcat3/Reep2/Pigv/Pom121/Degs1/Emc4/Mgst1/Duoxa2/Tmed3/Mboat2/Pdia3/Dolk/Pyurf/Pomt1/Hrc/Tyro3/Plpp7/Caml/Arhgap32/Vma21/Ssr4/Nat8/Prkn/Phtf1/Dhcr7/Fads1/Pigg/Pigl/Myrfl/Rnf145/Gm16261/Nos1/Cybc1/Alg1/Tmem132a/Irgm2/Spcs2-ps/Rdh1/Rab9/Spast/Fam8a1/Atp10a/G6pc3/Spcs3/Cers6/Stimate/Slc37a3/Elovl5/Saraf/Ssr3/Erlin1/Lmbrd1/Tmem41b/Uchl1/Nus1/W…
GO:0005768	endosome	77/1849	578/20331	0.000428081	Vps8/Lamtor5/Wdr44/Rnf128/Ifitm2/Kcnq1/Snx3/Stx6/Slc2a2/Tgoln1/Rnf32/Ltf/2610528J11Rik/Dysf/Abca2/Tubgcp4/Slc30a10/Vps50/Exph5/Ccdc154/Dgkq/Ap5m1/Traf3/Hps6/Arhgap32/Bloc1s6/Cdkn1b/Rps6kc1/Washc3/Clvs1/Nbr1/Tsg101/Chmp1b/Sptbn2/Uevld/Rab9/Spast/Tmem106b/Serpinb1a/Arrdc4/Pld1/Sgk3/Mtmr2/Rab5a/Tmem165/Abca3/Slc31a2/Mcoln2/Laptm4b/Zfyve16/Pip4p2/Ehbp1/F2rl1/Atp6ap2/Calcrl/Atp7b/Fyco1/Gper1/Ubap1/Cd1…
GO:0036464	cytoplasmic ribonucleoprotein granule	27/1849	150/20331	0.000444548	Ddx3x/Zc3h12a/Wtip/Nxf1/Mex3a/Psma4/Bmal1/Shfl/Khnyn/Dcps/Larp4/Patl1/Serpinb1a/Btbd1/Mapt/Ythdf2/Ago4/Rnf135/Chtop/Nbdy/Pnrc2/Sarnp/Polr2d/Dcp2/Ago1/Exd1/Eif2s1
GO:0098798	mitochondrial protein complex	40/1849	255/20331	0.000465795	Tomm20/Cox7a1/Mrps34/Timm9/Mrpl47/Chchd10/Mrpl16/Mrpl36/Mrpl44/Uqcrc1/Ndufab1/Timm17b/Cox6a1/Ndufs5-ps/Mrpl32/Gm30251/Mrps31/Hadhb/Mrpl15/Ndufs6b/Samm50/Uqcrq/Ndufb9/Atp5d/Wdr93/Gm46350/Atp5b/Ndufv3/Cox8b/Ndufa1/Immt/Gm6293/Mrpl3/Mrps2/Uqcrb/Cox4i1/Nsun4/Cox5b/COX1/Ndufc1
GO:0005741	mitochondrial outer membrane	27/1849	151/20331	0.000495327	Rtn4ip1/Mtch2/Agpat4/Tomm20/Miga2/Letmd1/Kmo/Armc1/Mgst1/Maob/Exd2/Prkn/Hadhb/Nos1/Samm50/Myo19/Cpt1a/Bnip3l-ps/Tigar/Gm46350/Usp30/Mief1/Mavs/Rhot1/Slc44a1/Gm20604/Vdac3
GO:0070069	cytochrome complex	12/1849	45/20331	0.000516336	Cox7a1/Coa6/Uqcrc1/Cox6a1/COX2/Uqcrq/Cox8b/Gm6293/Uqcrb/Cox4i1/Cox5b/COX1
GO:0098590	plasma membrane region	108/1849	870/20331	0.000516693	Krt19/Cavin2/Snph/Kcnq1/Cldn3/Myh10/Itga8/Ctnnb1/Lrp4/Slc28a2/Eppk1/Cd177/Car4/Slc2a2/Rims2/Grin2d/Gpihbp1/Cdh17/Kcnb1/Igsf9b/Nipsnap1/Rangrf/Arf4/Eno1b/Naip1/Kifap3/Birc5/Podxl/Pdia3/Shroom1/Slc26a6/P2rx6/Nrp2/Spry2/Igfbp2/Heph/Hpgd/Slc30a1/Rab18/Plekha1/Slc27a1/Txndc15/Syp/Sptbn2/Slc5a12/Itgb4/Pdxp/Lrfn4/Sapcd2/Nt5e/Scnn1a/Megf11/Il18/Lrrc4b/Grin1/Pld1/1700034H15Rik/Mtmr2/F2rl2/Slc26a3/Mapt/Reg…
GO:0032591	dendritic spine membrane	6/1849	13/20331	0.000548735	Itga8/Shisa8/Atp6ap2/Gper1/Kcnc3/Ppp1r9b
GO:0098796	membrane protein complex	113/1849	920/20331	0.00057435	Ap4s1/Elovl6/Tomm20/Lamtor5/Krt19/Cox7a1/Pdzd11/Kcnq1/Itga8/Ctnnb1/Coa6/Copg2/Stx6/Grin2d/Cdh17/Kcnb1/Pik3cg/Chchd10/Tmed3/Itga1/Gjb1/Pdia3/Noxo1/Uqcrc1/Ndufab1/Timm17b/Copb2/Casp8/Ap5m1/Traf3/Pyurf/Slc26a6/Cox6a1/Ndufs5-ps/Slc5a3/Bloc1s6/Gm30251/Epn2/Itgal/Lrrc26/Itgax/Kcng1/Noxa1/Catspere2/Gnb5/COX2/Wnt9b/Ndufs6b/Itgb4/Pkd1l3/Samm50/Uqcrq/Spcs2-ps/Ndufb9/Fam8a1/Scnn1a/Spcs3/Gm6581/Atp5d/Sec24b/…
GO:0035770	ribonucleoprotein granule	28/1849	161/20331	0.000623668	Ddx3x/Zc3h12a/Wtip/Nxf1/Mex3a/Psma4/Bmal1/Shfl/Khnyn/Dcps/Larp4/Patl1/Serpinb1a/Btbd1/Mapt/Ythdf2/Ago4/Rnf135/Chtop/Nbdy/Pnrc2/Sarnp/Polr2d/Dcp2/Ago1/Exd1/Hnrnpa3/Eif2s1
GO:0031301	integral component of organelle membrane	40/1849	259/20331	0.000638945	Elovl6/Hspa5/Edem1/Hacd2/Stx6/Syngr1/Mpc1/Entpd4/Chchd10/Pdia3/Dolk/Timm17b/Gm46840/P2rx6/Caml/Entpd4b/Dhcr7/Pigg/Syp/Adck1/Cpt1a/Rdh1/Tpst1/Pex11b/Slc37a3/Elovl5/Saraf/Wfs1/Rhot1/Immt/Slc35a2/B4galnt1/Sacm1l/Sv2a/Sfxn3/Bet1/Rfng/Mmgt2/Zfyve27/Tmem43
GO:0019866	organelle inner membrane	63/1849	464/20331	0.000843803	Cpt2/Mtch2/Mtfp1/Cox7a1/Timm8b/Letmd1/Fpgs/Mpc1/Coq6/Nipsnap1/Ndufaf3/Sdha/Kmo/Timm9/Mgst1/Dnajc30/Chchd10/Maob/Uqcrc1/Ndufab1/Timm17b/Gm46840/Cox6a1/Gm13570/P2rx6/Ndufs5-ps/Gm30251/Ino80dos/Hadhb/COX2/Ndufs6b/Tmpo/Samm50/Uqcrq/Adck1/Ndufb9/Cpt1a/Gm6581/Atp5d/Dhrs13/Slc25a26/Wdr93/Ldhd/Atp5b/Yme1l1/Ndufv3/Cox8b/Ndufa1/Immt/Slc25a33/Gm6293/Uqcrb/Cox4i1/Gm34303/Exog/Slc25a4/Otc/Cox5b/Sfxn3/COX1/Sta…
GO:0005777	peroxisome	21/1849	111/20331	0.000949343	Tysnd1/Gnpat/Fdps/Mgst1/Lonp2/Nudt7/Nbr1/Pxmp2/Pex11b/Ehhadh/Amacr/Acot4/Isoc1/Mavs/Cat/Akap11/Depp1/Hmgcr/Scp2/Nudt12/Pex1
GO:0042579	microbody	21/1849	111/20331	0.000949343	Tysnd1/Gnpat/Fdps/Mgst1/Lonp2/Nudt7/Nbr1/Pxmp2/Pex11b/Ehhadh/Amacr/Acot4/Isoc1/Mavs/Cat/Akap11/Depp1/Hmgcr/Scp2/Nudt12/Pex1
GO:0070469	respirasome	21/1849	111/20331	0.000949343	Cox7a1/Coa6/Uqcrc1/Ndufab1/Cox6a1/Ndufs5-ps/COX2/Ndufs6b/Uqcrq/Ndufb9/Wdr93/Ndufv3/Cox8b/Ndufa1/Gm6293/Uqcrb/Cox4i1/Gm34303/Cox5b/COX1/Ndufc1
GO:0014069	postsynaptic density	37/1849	239/20331	0.000954315	Itga8/Ctnnb1/Dab1/Lrp4/Grin2d/Igsf9b/Ppp2ca/Map3k7/P2rx6/Arhgap32/Plcb4/Slc30a1/Prkn/Ppp1r9a/Syp/Sipa1l1/Nos1/Lrfn4/Lrrc4b/1700034H15Rik/Mtmr2/Mapt/Entpd1/Shisa8/Nptn/Adam10/Cap2/Gper1/Rapgef4/Adcy1/Fbxo45/Abhd17b/Ppp1r9b/Gm15483/Sh2d5/Hnrnpa3/Gphn
GO:0031300	intrinsic component of organelle membrane	41/1849	273/20331	0.000969151	Elovl6/Hspa5/Edem1/Hacd2/Stx6/Syngr1/Mpc1/Entpd4/Chchd10/Pdia3/Dolk/Timm17b/Gm46840/P2rx6/Caml/Entpd4b/Dhcr7/Pigg/Syp/Adck1/Cpt1a/Rdh1/Tpst1/Pex11b/Slc37a3/Elovl5/Saraf/Wfs1/Rab5a/Rhot1/Immt/Slc35a2/B4galnt1/Sacm1l/Sv2a/Sfxn3/Bet1/Rfng/Mmgt2/Zfyve27/Tmem43
GO:0019867	outer membrane	29/1849	174/20331	0.00101833	Rtn4ip1/Mtch2/Agpat4/Tomm20/Miga2/Letmd1/Kmo/Armc1/Mgst1/Maob/Exd2/Prkn/Dhcr7/Hadhb/Nos1/Samm50/Myo19/Cpt1a/Bnip3l-ps/Tigar/Gm46350/Usp30/Mief1/Mavs/Rhot1/Slc44a1/Gm20604/Vdac3/Nucb2
GO:0031968	organelle outer membrane	29/1849	174/20331	0.00101833	Rtn4ip1/Mtch2/Agpat4/Tomm20/Miga2/Letmd1/Kmo/Armc1/Mgst1/Maob/Exd2/Prkn/Dhcr7/Hadhb/Nos1/Samm50/Myo19/Cpt1a/Bnip3l-ps/Tigar/Gm46350/Usp30/Mief1/Mavs/Rhot1/Slc44a1/Gm20604/Vdac3/Nucb2
GO:1990204	oxidoreductase complex	18/1849	90/20331	0.00109988	Pdhx/Noxo1/Uqcrc1/Ndufab1/Ndufs5-ps/Noxa1/Gm9199/Ndufs6b/Uqcrq/Ndufb9/Wdr93/Ndufv3/Ndufa1/Gpd1/Gm6293/Uqcrb/COX1/Ndufc1
GO:0098984	neuron to neuron synapse	39/1849	259/20331	0.00120824	Itga8/Ctnnb1/Dab1/Lrp4/Grin2d/Igsf9b/Ppp2ca/Map3k7/P2rx6/Arhgap32/Plcb4/Slc30a1/Prkn/Ppp1r9a/Syp/Sipa1l1/Nos1/Lrfn4/Lrrc4b/1700034H15Rik/Mtmr2/Mapt/Entpd1/Shisa8/Nptn/Adam10/Cap2/Gper1/Rapgef4/Adcy1/Fbxo45/Abhd17b/Ppp1r9b/Gm15483/Sh3gl2/Sh2d5/Hnrnpa3/Unc13b/Gphn
GO:0032279	asymmetric synapse	37/1849	244/20331	0.00139861	Itga8/Ctnnb1/Dab1/Lrp4/Grin2d/Igsf9b/Ppp2ca/Map3k7/P2rx6/Arhgap32/Plcb4/Slc30a1/Prkn/Ppp1r9a/Syp/Sipa1l1/Nos1/Lrfn4/Lrrc4b/1700034H15Rik/Mtmr2/Mapt/Entpd1/Shisa8/Nptn/Adam10/Cap2/Gper1/Rapgef4/Adcy1/Fbxo45/Abhd17b/Ppp1r9b/Gm15483/Sh2d5/Hnrnpa3/Gphn
GO:0099080	supramolecular complex	114/1849	957/20331	0.00161869	Parva/Krt19/Snph/Wdr44/Pdzd11/Mtus2/Myh10/Katna1/Ctnnb1/Ddx3x/Mmp2/Zc3h12a/Eppk1/Kptn/Wipf1/Prph/Wtip/Aurka/Dynlt1c/Reep2/Nxf1/Cenpa/Tubgcp4/Mex3a/Dnal4/Psma4/Cenpf/Dcn/Cd2ap/Kifap3/Ror2/Birc5/Rnf4/Shroom1/Bmal1/Shfl/Haus2/Ltbp1/Nefm/Hrc/Ahnak/Khnyn/Mid1/Prc1/Nes/Spry2/Rec8/Cep162/Nup160/Zwint/Kif2c/Dcps/Cep295/Nbr1/Anapc16/Tubgcp2/Myl4/Pkp2/Pcp4/Nos1/Larp4/Kifc2/Spast/Togaram1/Patl1/Krt10/Serpin…
GO:0098800	inner mitochondrial membrane protein complex	24/1849	139/20331	0.00162785	Cox7a1/Chchd10/Uqcrc1/Ndufab1/Timm17b/Cox6a1/Ndufs5-ps/Gm30251/Ndufs6b/Uqcrq/Ndufb9/Atp5d/Wdr93/Atp5b/Ndufv3/Cox8b/Ndufa1/Immt/Gm6293/Uqcrb/Cox4i1/Cox5b/COX1/Ndufc1
GO:0045121	membrane raft	39/1849	264/20331	0.0017285	Lamtor5/Cavin2/Sis/Kcnq1/Ctnnb1/Lrp4/Cd177/Hk1/Rangrf/Eno1b/Ppp2ca/Podxl/Casp8/Ahnak/Adgrg1/Prkn/Slc27a1/Nos1/Rgmb/Mapt/Rab5a/Faim2/Atp5b/Cdh13/Prtn3/Cd55/Tgfbr2/Kcne3/Pllp/Fyb2/Tnfrsf10b/Adcy1/Cntn1/Spred1/Cav3/Tgfbr1/Bves/Nos3/Cblb
GO:0098857	membrane microdomain	39/1849	264/20331	0.0017285	Lamtor5/Cavin2/Sis/Kcnq1/Ctnnb1/Lrp4/Cd177/Hk1/Rangrf/Eno1b/Ppp2ca/Podxl/Casp8/Ahnak/Adgrg1/Prkn/Slc27a1/Nos1/Rgmb/Mapt/Rab5a/Faim2/Atp5b/Cdh13/Prtn3/Cd55/Tgfbr2/Kcne3/Pllp/Fyb2/Tnfrsf10b/Adcy1/Cntn1/Spred1/Cav3/Tgfbr1/Bves/Nos3/Cblb
GO:0000346	transcription export complex	4/1849	7/20331	0.00190552	Nxf1/Thoc2l/Chtop/Sarnp
GO:0031252	cell leading edge	41/1849	283/20331	0.00194358	Parva/Itga8/Ctnnb1/Ddx3x/Cyfip1/Kptn/Wipf1/Dynlt1c/Gm12854/Layn/Kcnb1/Arf4/Raph1/Cd2ap/Duoxa2/Mtmr14/Sh3bp1/Podxl/Spry2/Plekha1/Ppp1r9a/Cttnbp2nl/Itgb4/Pdxp/Abi1/Tln2/Snora73b/Mapt/Rab5a/Reg1/Epha2/Shisa8/Cdc42bpa/Atp6ap2/Plekhh2/Gper1/Kcnc3/Avil/Stmn2/Abitram/Ppp1r9b
GO:0071782	endoplasmic reticulum tubular network	6/1849	16/20331	0.00201625	Reep2/Rab18/Spast/Stimate/Atl3/Zfyve27
GO:0031965	nuclear membrane	31/1849	201/20331	0.00250281	Phf8/Nudt1/Gchfr/Clcc1/Pom121/Lypla1/Nup205/Dtl/P2rx6/Slc30a1/Pcm1/Nr4a1/Dhcr7/Scrn1/Nos1/Itgb4/Tmpo/Spast/Noc4l/1700034H15Rik/Tent4a/Tnks/Wtap/Nucb2/Kpna4/Ptger4/Sort1/Cmtm3/Cnep1r1/Tmem43/Gm52783
GO:0005944	phosphatidylinositol 3-kinase complex, class IB	3/1849	4/20331	0.00279975	Pik3cg/Pik3r5/Pik3r6
GO:0097651	phosphatidylinositol 3-kinase complex, class I	3/1849	4/20331	0.00279975	Pik3cg/Pik3r5/Pik3r6
GO:0098827	endoplasmic reticulum subcompartment	6/1849	17/20331	0.0028783	Reep2/Rab18/Spast/Stimate/Atl3/Zfyve27
GO:0005635	nuclear envelope	45/1849	327/20331	0.00335017	Phf8/Nudt1/Gchfr/Nxf1/Clcc1/Pom121/Lypla1/Bnip2/Cenpf/Nup205/Dtl/Tyro3/P2rx6/Plpp7/Nup160/Slc30a1/Pcm1/Nr4a1/Dhcr7/Scrn1/Nos1/Itgb4/Tmpo/Spast/Bnip3l-ps/Noc4l/1700034H15Rik/Tent4a/E2f5/Tnks/Wtap/Nucb2/Kpna4/Gper1/Mgst2/Bche/Ptger4/Sort1/Cmtm3/Cnep1r1/Mns1/Pla2g4c/Tmem43/Agpat5/Gm52783
GO:0098793	presynapse	47/1849	348/20331	0.00398107	Snph/Ctnnb1/Cyfip1/Bltp1/Stx6/Rims2/Syngr1/Tbc1d24/Ppp2ca/Dgkq/Cops5/Elk1/Nr4a1/Prkn/Npy/Syp/Nufip1/Sptbn2/Gnb5/Nos1/Begain/Phaf1/Pnisr/Lrrc4b/Mtmr2/Sgip1/Wfs1/Rab5a/Entpd1/Ophn1/Adam23/Nptn/Adam10/Gper1/Rapgef4/Septin4/Kcnc3/Fbxo45/Gm31336/Vamp2/Cntn1/Cadps2/Sv2a/Cyp46a1/Sh3gl2/Gm35065/Unc13b
GO:0005819	spindle	41/1849	295/20331	0.00415043	Ckap2l/Poldip2/Katna1/Aurka/Dynlt1c/Tubgcp4/Bnip2/Cenpf/Ppp2ca/Kifap3/Birc5/Haus2/Prc1/Cep162/Wapl/Cep295/Tubgcp2/Iqcb1/Spast/Togaram1/Smc6/Ddx11/Terf1/Mzt1/Fam161a/Gm46764/Tnks/Spdl1/Klhl42/Agbl5/Cep19/Mapre1/Sncg/Dctn4/Togaram2/Ikbkg/Gm5808/Spice1/Pla2g4c/Rmdn1/Kif20a
GO:0099572	postsynaptic specialization	37/1849	260/20331	0.00423269	Itga8/Ctnnb1/Dab1/Lrp4/Grin2d/Igsf9b/Ppp2ca/Map3k7/P2rx6/Arhgap32/Plcb4/Slc30a1/Prkn/Ppp1r9a/Syp/Sipa1l1/Nos1/Lrfn4/Lrrc4b/1700034H15Rik/Mtmr2/Mapt/Entpd1/Shisa8/Nptn/Adam10/Cap2/Gper1/Rapgef4/Adcy1/Fbxo45/Abhd17b/Ppp1r9b/Gm15483/Sh2d5/Hnrnpa3/Gphn
GO:0042383	sarcolemma	19/1849	109/20331	0.00424573	Krt19/Kcnq1/Car4/Kcnb1/Dysf/Slc38a2/Ahnak/Slc30a1/Trim72/Lman2l/Col6a2/Nos1/Popdc2/1700034H15Rik/Vcl/Fer1l5/Cav3/Bves/Nos3
GO:0005750	mitochondrial respiratory chain complex III	5/1849	13/20331	0.00427136	Uqcrc1/Uqcrq/Gm6293/Uqcrb/COX1
GO:0098589	membrane region	39/1849	278/20331	0.00433694	Lamtor5/Cavin2/Sis/Kcnq1/Ctnnb1/Lrp4/Cd177/Hk1/Rangrf/Eno1b/Ppp2ca/Podxl/Casp8/Ahnak/Adgrg1/Prkn/Slc27a1/Nos1/Rgmb/Mapt/Rab5a/Faim2/Atp5b/Cdh13/Prtn3/Cd55/Tgfbr2/Kcne3/Pllp/Fyb2/Tnfrsf10b/Adcy1/Cntn1/Spred1/Cav3/Tgfbr1/Bves/Nos3/Cblb
GO:0012506	vesicle membrane	47/1849	350/20331	0.00444132	Rph3al/Kcnq1/Slc28a2/Cd177/Car4/Stx6/Syngr1/Snx18/Tbc1d24/Dysf/Tmed3/Dgkq/Copb2/Slc26a6/Vma21/Epn2/Trim72/Prkn/Syp/Nos1/Tmem198b/Phaf1/Rab9/Tmem30a/Sec24b/Ptprn/Sgip1/Wfs1/Rab5a/Abca3/Aftph/Tmem199/Ica1/Pip4p2/Gper1/Sh3kbp1/Sort1/Vamp2/Tyr/Sv2a/Sh3gl2/Tmed10-ps/Scara5/Unc13b/Nos3/Pam/Dennd4c
GO:0005876	spindle microtubule	11/1849	51/20331	0.00537435	Aurka/Kifap3/Birc5/Haus2/Cep295/Togaram1/Fam161a/Gm46764/Mapre1/Togaram2/Rmdn1
GO:0032590	dendrite membrane	8/1849	31/20331	0.00541893	Itga8/Kcnb1/Reg1/Shisa8/Atp6ap2/Gper1/Kcnc3/Ppp1r9b
GO:0005671	Ada2/Gcn5/Ada3 transcription activator complex	4/1849	9/20331	0.00591045	Pole4/Map3k7/Zzz3/Kat14
GO:0030133	transport vesicle	34/1849	239/20331	0.0059552	Rph3al/Kcnq1/Crispld2/Car4/Stx6/Syngr1/Tgoln1/Cops5/Lyz1/Vma21/Bloc1s6/Fgfr3/Prkn/Syp/Sptbn2/Phaf1/Tmem30a/Sec24b/Ptprn/Mtmr2/Wfs1/Rab5a/Entpd1/Aftph/Adam10/Septin4/Sort1/Vamp2/Sv2a/Sh3gl2/Tmed10-ps/Unc13b/Pam/Plekhf2
GO:0045275	respiratory chain complex III	5/1849	14/20331	0.00615178	Uqcrc1/Uqcrq/Gm6293/Uqcrb/COX1
GO:0140268	endoplasmic reticulum-plasma membrane contact site	3/1849	5/20331	0.00652496	Stimate/Saraf/Sacm1l
GO:0005815	microtubule organizing center	70/1849	573/20331	0.00673159	Fbxo31/Ckap2l/Leo1/Marcks/Mtus2/Katna1/Ctnnb1/Ddx3x/Aurka/Slain2/Dysf/Tubgcp4/Bnip2/Cenpf/Cd2ap/Kifap3/Birc5/Haus2/Dtl/Cep135/Cep162/Pcm1/Wapl/Cep295/Tubgcp2/Iqcb1/Ift56/Spast/Togaram1/Gm47324/Rita1/Ddx11/Cct4/Dnaaf2/Pde4dip/Pik3r5/Iqcd/Nme7/Gas8/Mzt1/Ythdf2/Fam161a/Cep55/Cc2d1a/Tnks/Spdl1/Cfap157/Ccne2/Odf2l/Cul7/Ninl/Tedc1/Ttbk2/Tbc1d30/Cep19/Ehbp1/Bbof1/Tsen2/Zmynd10/Mapre1/2700049A03Rik/Dctn4…
GO:0030658	transport vesicle membrane	20/1849	122/20331	0.00690569	Rph3al/Car4/Stx6/Syngr1/Vma21/Prkn/Syp/Phaf1/Tmem30a/Sec24b/Ptprn/Wfs1/Rab5a/Aftph/Vamp2/Sv2a/Sh3gl2/Tmed10-ps/Unc13b/Pam
GO:0005813	centrosome	53/1849	414/20331	0.00699164	Fbxo31/Ckap2l/Leo1/Marcks/Mtus2/Katna1/Ctnnb1/Ddx3x/Aurka/Slain2/Dysf/Tubgcp4/Bnip2/Cenpf/Cd2ap/Kifap3/Haus2/Dtl/Cep135/Cep162/Pcm1/Wapl/Cep295/Iqcb1/Ift56/Spast/Rita1/Ddx11/Cct4/Pde4dip/Pik3r5/Nme7/Mzt1/Ythdf2/Fam161a/Cep55/Ccne2/Odf2l/Cul7/Ninl/Cep19/Tsen2/Zmynd10/Mapre1/2700049A03Rik/Dctn4/Hook1/2700099C18Rik/Gm5808/Cep152/Spice1/Cep290/Mecp2
GO:0000785	chromatin	64/1849	519/20331	0.00758404	Hmga1b/Kdm3b/H2ac23/Aff4/Nasp/Egr1/Ctnnb1/Morf4l1-ps1/Myocd/Cenpa/Zfp618/Skic3/Exosc4/Pawr/Ep300/Ipo4/H2ac18/H2bc12/Prdm10/Wapl/Smarca2/Morc2a/Nufip1/H2ac11/H2bc21/Tmpo/Csnk2a1-ps3/Rbbp7/Chaf1b/H4c11/Cbx2/Gm6750/Hmgn1/Uchl5/Gm47655/H2ac8/Ddx11/Dpf1/Setd5/Shprh/H4c8/Esco1/H4c6/H4c2/H2bc13/H2ac25/H4c1/Gm7931/Ss18l1/H2ac6/H4c14/Foxc1/H2ac13/H2aj/Hlcs/Dnmt3b/Dpf3/Dffb/Etv3/Gm5808/Hmgn3/H3c15/Rbl2/Mec…
GO:0030136	clathrin-coated vesicle	16/1849	91/20331	0.00760504	Hip1/Tgoln1/Snx18/Lyz1/Dennd1b/Epn2/Clvs1/Syp/Lmbrd1/Sgip1/Aftph/Adam10/Sort1/Vps33a/Gm32391/Tmed10-ps
GO:0044297	cell body	61/1849	491/20331	0.00769339	Gdpd5/Fbxo31/Snph/Kcnq1/Itga8/Katna1/Dab1/Lrp4/Cyfip1/Aurka/Dynlt1c/Mgat5/Kcnb1/Igsf9b/Tac1/Slc38a2/Naip1/Ror2/Nmnat3/Mast1/Ltbp1/Casp8/Pawr/P2rx6/Elk1/Prkn/Npy/Ppp1r9a/Sptbn2/Gnb5/Sipa1l1/Amigo1/Begain/Gip/Kcnn1/Elovl5/Cct4/Mapt/Rab5a/Reg1/Gnao1/Entpd1/Tmprss5/Kcne3/Ada/Adam10/Nucb2/Atp6ap2/Adnp/Gper1/Ptger4/Rapgef4/Septin4/Kcnc3/Sort1/Sv2a/Ppp1r9b/Hspa1l/Sh3gl2/Gphn/Star
GO:0045277	respiratory chain complex IV	8/1849	33/20331	0.00810454	Cox7a1/Coa6/Cox6a1/COX2/Cox8b/Cox4i1/Cox5b/COX1
GO:0030892	mitotic cohesin complex	2/1849	2/20331	0.0082669	Rec8/Sgo2a
GO:0031021	interphase microtubule organizing center	2/1849	2/20331	0.0082669	Birc5/Mzt1
GO:0035061	interchromatin granule	2/1849	2/20331	0.0082669	Gm33950/Smc6
GO:1990794	basolateral part of cell	2/1849	2/20331	0.0082669	Kcnq1/Kcne3
GO:0030135	coated vesicle	23/1849	149/20331	0.00830964	Slc28a2/Hip1/Tgoln1/Snx18/Tmed3/Copb2/Lyz1/Dennd1b/Vma21/Epn2/Clvs1/Yipf6/Syp/Sec24b/Lmbrd1/Sgip1/Aftph/Tmem199/Adam10/Sort1/Vps33a/Gm32391/Tmed10-ps
GO:0005881	cytoplasmic microtubule	11/1849	54/20331	0.00840303	Snph/Mtus2/Dynlt1c/Reep2/Birc5/Mid1/Cep162/Togaram1/Fam161a/Mapre1/Togaram2
GO:0030686	90S preribosome	5/1849	15/20331	0.00854544	Imp4/Casp8/Utp4/Wdr36/Imp3
GO:0000323	lytic vacuole	46/1849	354/20331	0.00877589	Lamtor5/Gaa/Ifitm2/Kcnq1/Hps4/Abca2/Entpd4/6330537M06Rik/Ap5m1/Hps6/Entpd4b/Rps6kc1/Nbr1/Meak7/Nos1/Rab9/Tmem106b/Serpinb1a/Borcs7/Ctsl/Lmbrd1/Tmem165/Abca3/Tnfaip3/Prtn3/Mios/Tmem9/Tmem199/Mcoln2/Laptm4b/Pip4p2/Ada/Atp6ap2/Calcrl/Fyco1/Cd164/Sort1/Glb1/Glmp/Vps33a/Borcs6/Ocln/Laptm5/Cpq/Ctso/Sidt1
GO:0005764	lysosome	46/1849	354/20331	0.00877589	Lamtor5/Gaa/Ifitm2/Kcnq1/Hps4/Abca2/Entpd4/6330537M06Rik/Ap5m1/Hps6/Entpd4b/Rps6kc1/Nbr1/Meak7/Nos1/Rab9/Tmem106b/Serpinb1a/Borcs7/Ctsl/Lmbrd1/Tmem165/Abca3/Tnfaip3/Prtn3/Mios/Tmem9/Tmem199/Mcoln2/Laptm4b/Pip4p2/Ada/Atp6ap2/Calcrl/Fyco1/Cd164/Sort1/Glb1/Glmp/Vps33a/Borcs6/Ocln/Laptm5/Cpq/Ctso/Sidt1
GO:0030054	cell junction	70/1849	580/20331	0.00884584	Parva/Poldip2/Cldn3/Ctnnb1/Eppk1/Wtip/Gm53915/Slc2a2/Lmln/Cdh17/Rangrf/Stard8/Cd2ap/Sh3bp1/Lama1/Gjb1/Shroom1/6330537M06Rik/Ahnak/P2rx6/Pkp2/Tjp1/Klf11/Gm33950/Ell3/Itgb4/Pdxp/Ppp1cb/Sapcd2/Sh3pxd2b/Abi1/0610040J01Rik/Cldn2/Tln2/Dcaf6/Mtf2/Cd53/Arvcf/Vcl/Epha2/Gjc2/Pak6/Itga11/Mios/Gjb2/Cdc42bpa/Ada/Adam10/Nfia/Mapre1/Dctn4/Atp7b/Sh3kbp1/Gja4/Prkch/Avil/Dstyk/Sv2a/Ppp1r9b/Dcp2/Ocln/Nectin2/Il1rl1…
GO:0005759	mitochondrial matrix	39/1849	291/20331	0.00922175	Nudt1/Poldip2/Pdhx/Fpgs/Mrps34/Fdps/Acadsb/Malsu1/Mrpl47/Mrpl16/Mrpl36/Mrpl44/Ndufab1/Nags/Tefm/Exd2/Lyrm7/Mrpl32/Mrps31/Hadhb/Mrpl15/Adprs/Mmut/Atp5b/Mief1/Pitrm1/Pcca/Zmiz1os1/Pdpr/Acot9/Mrpl3/Tfb1m/Mrps2/Xrcc3/Acot2/Nsun4/Hspa1l/Otc/Dglucy
GO:0005765	lysosomal membrane	24/1849	160/20331	0.0100968	Gaa/Ifitm2/Hps4/Entpd4/Ap5m1/Hps6/Entpd4b/Meak7/Tmem106b/Borcs7/Lmbrd1/Tmem165/Abca3/Mios/Tmem9/Laptm4b/Pip4p2/Atp6ap2/Cd164/Sort1/Glmp/Vps33a/Borcs6/Ocln
GO:0098852	lytic vacuole membrane	24/1849	160/20331	0.0100968	Gaa/Ifitm2/Hps4/Entpd4/Ap5m1/Hps6/Entpd4b/Meak7/Tmem106b/Borcs7/Lmbrd1/Tmem165/Abca3/Mios/Tmem9/Laptm4b/Pip4p2/Atp6ap2/Cd164/Sort1/Glmp/Vps33a/Borcs6/Ocln
GO:0060205	cytoplasmic vesicle lumen	5/1849	16/20331	0.0115133	Gip/Penk/Prtn3/Ada/Psma5
GO:0000779	condensed chromosome, centromeric region	8/1849	35/20331	0.0116806	Cenpa/Cenpf/Rec8/Spdl1/Nsl1/Ss18l1/2700099C18Rik/Sgo2a
GO:0043256	laminin complex	3/1849	6/20331	0.0121698	Lamb2/Lama1/Lamb3
GO:0043025	neuronal cell body	55/1849	446/20331	0.0125742	Gdpd5/Fbxo31/Snph/Kcnq1/Itga8/Katna1/Dab1/Lrp4/Cyfip1/Aurka/Dynlt1c/Mgat5/Kcnb1/Igsf9b/Tac1/Slc38a2/Naip1/Ror2/Nmnat3/Mast1/Ltbp1/Pawr/P2rx6/Elk1/Prkn/Npy/Ppp1r9a/Sptbn2/Sipa1l1/Amigo1/Begain/Gip/Kcnn1/Elovl5/Mapt/Rab5a/Reg1/Entpd1/Tmprss5/Kcne3/Ada/Adam10/Nucb2/Adnp/Gper1/Ptger4/Rapgef4/Septin4/Kcnc3/Sort1/Sv2a/Ppp1r9b/Sh3gl2/Gphn/Star
GO:0030140	trans-Golgi network transport vesicle	5/1849	17/20331	0.0151112	Tgoln1/Lyz1/Aftph/Sort1/Tmed10-ps
GO:0048786	presynaptic active zone	10/1849	51/20331	0.0152331	Ctnnb1/Rims2/Syp/Nufip1/Pnisr/Nptn/Gper1/Gm31336/Sv2a/Unc13b
GO:0000139	Golgi membrane	50/1849	404/20331	0.0157024	Smpd3/Pgap3/Galnt1/Tmbim4/Stx6/Mgat5/Pgap2/Entpd4/Gask1b/B4galt2/Tmed3/Copb2/Arhgap32/Cog1/Entpd4b/Gbgt1/Prkn/Yipf6/Gbp3/Sptbn2/Tmem132a/Irgm2/Arfgap2/Rab9/Tpst1/Galnt11/Pxylp1/Ebag9/Tmem165/Tnks/Aftph/Ica1/Slc35a2/Adam10/Atp7b/Gper1/St3gal5/Fut7/Sort1/B4galnt1/Sacm1l/Tmed10-ps/Bet1/Cav3/Rfng/Mmgt2/Atp2c2/Large2/Slc35a1/B4galt4
GO:0005747	mitochondrial respiratory chain complex I	8/1849	37/20331	0.0162995	Ndufab1/Ndufs5-ps/Ndufs6b/Ndufb9/Wdr93/Ndufv3/Ndufa1/Ndufc1
GO:0030964	NADH dehydrogenase complex	8/1849	37/20331	0.0162995	Ndufab1/Ndufs5-ps/Ndufs6b/Ndufb9/Wdr93/Ndufv3/Ndufa1/Ndufc1
GO:0045271	respiratory chain complex I	8/1849	37/20331	0.0162995	Ndufab1/Ndufs5-ps/Ndufs6b/Ndufb9/Wdr93/Ndufv3/Ndufa1/Ndufc1
GO:0048471	perinuclear region of cytoplasm	59/1849	491/20331	0.016542	Slc2a4/Gdpd5/Wdr44/Rnf128/Galnt1/Ctnnb1/Dab1/Cyfip1/Car4/Aurka/Stx6/Ppm1f/Inhba/Ndor1/Bnip2/Vps50/Rangrf/Angel1/Cd2ap/Mtmr14/Ywhab/Ltbp1/Slc5a3/Heph/Prkn/Npy/Gbp3/Syp/Sptbn2/Nos1/Pkn3/Klhl7/Spast/Aatk/Mvp/Per2/Pla2g5/Mtmr2/Rab5a/Reg1/Cdh13/Aftph/Cul7/Cdkn3/Adam10/Akip1/Prkra/Atp7b/Gper1/Mogat2/Rasgrp3/Sort1/Xrcc3/Sh3gl2/Dnaja1/Tgfa/Atp2c2/Olfm4/Ankrd13b
GO:0036477	somatodendritic compartment	77/1849	667/20331	0.0173612	Gdpd5/Fbxo31/Snph/Gchfr/Kcnq1/Itga8/Katna1/Dab1/Lrp4/Cyfip1/Aurka/Dynlt1c/Mgat5/Kcnb1/Igsf9b/Tac1/Arf4/Slc38a2/Cd2ap/Naip1/Ror2/Nmnat3/Mast1/Ltbp1/Pawr/P2rx6/Arhgap32/Plcb4/Zwint/Elk1/Prkn/Npy/Ppp1r9a/Gpr179/Sptbn2/Sipa1l1/Nos1/Amigo1/Ephb3/Begain/Gip/Phaf1/Aatk/Kcnn1/Vstm5/Elovl5/Mtmr2/Mapt/Wfs1/Rab5a/Reg1/Gnao1/Entpd1/Tmprss5/Ophn1/Nptn/Kcne3/Ada/Adam10/Nucb2/Adnp/Gper1/Ptger4/Rapgef4/Septin4/K…
GO:0031984	organelle subcompartment	32/1849	240/20331	0.0182629	Ap4s1/Smpd3/Galnt1/Tmbim4/Car4/Stx6/Reep2/Tgoln1/B4galt2/Tmed3/Lyz1/Rab18/Clvs1/Yipf6/Phaf1/Spast/Stimate/Tmem165/Postn/Aftph/Adam10/Nucb2/Atp7b/Gper1/Fut7/Sort1/Gm32391/Slc66a2/Atp2c2/Atl3/Zfyve27/B4galt4
GO:0032589	neuron projection membrane	9/1849	45/20331	0.0183747	Itga8/Kcnb1/Mapt/Reg1/Shisa8/Atp6ap2/Gper1/Kcnc3/Ppp1r9b
GO:0030055	cell-substrate junction	20/1849	134/20331	0.0186369	Parva/Eppk1/Wtip/Gm53915/Lmln/Stard8/Klf11/Itgb4/Ppp1cb/Tln2/Dcaf6/Mtf2/Epha2/Itga11/Mapre1/Dctn4/Sh3kbp1/Avil/Il1rl1/Synpo2
GO:0008305	integrin complex	7/1849	31/20331	0.0190965	Itga8/Itga1/Itgal/Itgax/Itgb4/Itga11/Itgam
GO:0031983	vesicle lumen	5/1849	18/20331	0.019389	Gip/Penk/Prtn3/Ada/Psma5
GO:0030659	cytoplasmic vesicle membrane	42/1849	334/20331	0.0197854	Rph3al/Kcnq1/Cd177/Car4/Stx6/Syngr1/Snx18/Tbc1d24/Dysf/Tmed3/Copb2/Slc26a6/Vma21/Epn2/Trim72/Prkn/Syp/Phaf1/Rab9/Tmem30a/Sec24b/Ptprn/Sgip1/Wfs1/Rab5a/Abca3/Aftph/Tmem199/Ica1/Pip4p2/Gper1/Sh3kbp1/Sort1/Vamp2/Tyr/Sv2a/Sh3gl2/Tmed10-ps/Scara5/Unc13b/Pam/Dennd4c
GO:0005861	troponin complex	3/1849	7/20331	0.019868	Tnnt3/Tnni2/Tnni1
GO:0031464	Cul4A-RING E3 ubiquitin ligase complex	3/1849	7/20331	0.019868	Cul4a/Dtl/Cdkn1b
GO:0005769	early endosome	30/1849	224/20331	0.0205697	Vps8/Kcnq1/Snx3/Stx6/Ltf/2610528J11Rik/Dysf/Slc30a10/Ccdc154/Hps6/Rps6kc1/Washc3/Clvs1/Serpinb1a/Sgk3/Mtmr2/Rab5a/Tmem165/Laptm4b/Zfyve16/F2rl1/Gper1/F8a/Sort1/Gm32391/Sh3gl2/Mmgt2/Ankrd13b/Rnft1/Plekhf2
GO:0005925	focal adhesion	19/1849	127/20331	0.0209639	Parva/Wtip/Gm53915/Lmln/Stard8/Klf11/Itgb4/Ppp1cb/Tln2/Dcaf6/Mtf2/Epha2/Itga11/Mapre1/Dctn4/Sh3kbp1/Avil/Il1rl1/Synpo2
GO:0036064	ciliary basal body	19/1849	127/20331	0.0209639	Cenpf/Kifap3/Pcm1/Ift56/Togaram1/Gm47324/Dnaaf2/Iqcd/Gas8/Fam161a/Cfap157/Odf2l/Ttbk2/Tbc1d30/Cep19/Bbof1/Mapre1/2700049A03Rik/Cep290
GO:0045177	apical part of cell	41/1849	326/20331	0.021052	Kcnq1/Itga8/Ctnnb1/Dab1/Car4/Slc2a2/Gpihbp1/Mgst1/Duoxa2/Birc5/Podxl/Pdia3/Shroom1/Slc26a6/Igfbp2/Pcm1/Rab18/Sptbn2/Slc5a12/Sapcd2/Scnn1a/Il18/Pld1/F2rl2/Slc26a3/Cd55/Cyp4f18/Aqp8/Slc23a2/Cldnd1/Zmynd10/Slc5a8/Atp6ap2/Atp7b/Rapgef4/Abcg2/Ceacam20/Dstyk/Ocln/Tgfbr1/Nos3
GO:0031463	Cul3-RING ubiquitin ligase complex	6/1849	25/20331	0.0219677	Katna1/Klhl7/Klhl42/Klhl8/Klhl13/Klhl9
GO:0000786	nucleosome	21/1849	145/20331	0.0220862	H2ac23/Cenpa/H2ac18/H2bc12/H2ac11/H2bc21/H4c11/Gm47655/H2ac8/Shprh/H4c8/H4c6/H4c2/H2bc13/H2ac25/H4c1/H2ac6/H4c14/H2ac13/H2aj/H3c15
GO:0005778	peroxisomal membrane	8/1849	39/20331	0.0221074	Gnpat/Mgst1/Nbr1/Pxmp2/Pex11b/Mavs/Hmgcr/Pex1
GO:0031903	microbody membrane	8/1849	39/20331	0.0221074	Gnpat/Mgst1/Nbr1/Pxmp2/Pex11b/Mavs/Hmgcr/Pex1
GO:0030173	integral component of Golgi membrane	7/1849	32/20331	0.0225787	Entpd4/Entpd4b/Tpst1/Slc35a2/B4galnt1/Bet1/Rfng
GO:0000275	mitochondrial proton-transporting ATP synthase complex, catalytic core F(1)	2/1849	3/20331	0.0232985	Atp5d/Atp5b
GO:0008385	IkappaB kinase complex	2/1849	3/20331	0.0232985	Map3k7/Ikbkg
GO:0034457	Mpp10 complex	2/1849	3/20331	0.0232985	Imp4/Imp3
GO:0042585	germinal vesicle	2/1849	3/20331	0.0232985	Marcks/Aurka
GO:0097574	lateral part of cell	2/1849	3/20331	0.0232985	Kcnq1/Kcne3
GO:0097636	intrinsic component of autophagosome membrane	2/1849	3/20331	0.0232985	Entpd4/Entpd4b
GO:0097637	integral component of autophagosome membrane	2/1849	3/20331	0.0232985	Entpd4/Entpd4b
GO:1990452	Parkin-FBXW7-Cul1 ubiquitin ligase complex	2/1849	3/20331	0.0232985	Prkn/Cul1
GO:0005667	transcription factor complex	35/1849	274/20331	0.0253791	Hmga1b/Ctnnb1/Taf5l/Wtip/Tbx2/Wwox/Myocd/Rfxap/Gtf2a2/Pou2af1/Bmal1/Ep300/Pitx2/Tcf15/Nr4a1/Rfx5/Six5/Smad9/Yy2/Sox8/Hnf1b/Npas2/Gm2788/E2f5/Snapc4/Brf2/Med18/Glis2/Adnp/Zfp143/Mxd3/Taf13/Tfcp2l1/Rbl2/Trerf1
GO:0001650	fibrillar center	16/1849	104/20331	0.0255367	Leo1/Aff4/Imp4/Cd2ap/Arhgap32/Utp4/Nufip1/Thap1/Ddx11/Terf1/E2f5/Cc2d1a/Pak6/Selenbp1/Utp15/Trerf1
GO:0016323	basolateral plasma membrane	25/1849	183/20331	0.0260821	Kcnq1/Ctnnb1/Eppk1/Slc2a2/Gpihbp1/Cdh17/Naip1/Slc26a6/Heph/Hpgd/Slc27a1/Itgb4/Megf11/Entpd1/Cnnm2/Slc12a6/Slc23a2/Car11/Atp7b/Rapgef4/Dstyk/Tgfbr1/Tgfa/Dsp/Atp2c2
GO:0031228	intrinsic component of Golgi membrane	7/1849	33/20331	0.0264756	Entpd4/Entpd4b/Tpst1/Slc35a2/B4galnt1/Bet1/Rfng
GO:0043195	terminal bouton	9/1849	48/20331	0.0272425	Cyfip1/Ppp2ca/Prkn/Npy/Syp/Rab5a/Ophn1/Gm35065/Unc13b
GO:0030027	lamellipodium	19/1849	131/20331	0.0280519	Parva/Ctnnb1/Cyfip1/Kptn/Dynlt1c/Sh3bp1/Podxl/Ppp1r9a/Cttnbp2nl/Pdxp/Abi1/Snora73b/Epha2/Cdc42bpa/Plekhh2/Avil/Stmn2/Abitram/Ppp1r9b
GO:1990234	transferase complex	64/1849	556/20331	0.029535	Ccnd1/Elovl6/Fbxo31/Leo1/Katna1/Taf5l/Pole4/Ubr3/Morf4l1-ps1/Ccni/Pigv/Cul4a/Dda1/Gtf2a2/Pdss2/Pik3cg/Pyurf/Map3k7/Phf20l1/Dtl/Naa25/Ep300/Cdkn1b/Prkn/Anapc16/Gm33950/Klhl7/Rbbp7/Fbxo33/Cbx2/Fam8a1/Smc6/Dcaf6/Pik3r5/Cul1/Nus1/Pggt1b/Ccne2/Sesn2/Klhl42/Cul7/Wtap/Klhl8/Med18/Phkb/Usp47/Taf13/Ddost/Dydc2/Pik3r6/Dcun1d4/Polr2d/Ikbkg/Zzz3/Polr3g/Klhl13/Klhl9/Trmt6/Tgfbr1/Atxn7l3/Kat14/Trim21/Wdr5b/Sup…
GO:0000782	telomere cap complex	3/1849	8/20331	0.0296666	Ctc1/Terf1/Terf2ip
GO:0000783	nuclear telomere cap complex	3/1849	8/20331	0.0296666	Ctc1/Terf1/Terf2ip
GO:0000784	nuclear chromosome, telomeric region	3/1849	8/20331	0.0296666	Ctc1/Terf1/Terf2ip
GO:0000178	exosome (RNase complex)	5/1849	20/20331	0.0301491	Exosc4/Gtpbp1/Mphosph6/Exosc8/Exosc3
GO:0000777	condensed chromosome kinetochore	5/1849	20/20331	0.0301491	Cenpa/Cenpf/Spdl1/Nsl1/2700099C18Rik
GO:0016327	apicolateral plasma membrane	5/1849	20/20331	0.0301491	Krt19/Cldn3/Ctnnb1/Eppk1/Ocln
GO:0032588	trans-Golgi network membrane	5/1849	20/20331	0.0301491	Stx6/Tmem165/Aftph/Atp7b/Atp2c2
GO:0005751	mitochondrial respiratory chain complex IV	6/1849	27/20331	0.031436	Cox7a1/Cox6a1/Cox8b/Cox4i1/Cox5b/COX1
GO:0098563	intrinsic component of synaptic vesicle membrane	6/1849	27/20331	0.031436	Stx6/Syngr1/Syp/Wfs1/Rab5a/Sv2a
GO:0034774	secretory granule lumen	4/1849	14/20331	0.0325106	Gip/Penk/Prtn3/Psma5
GO:0042588	zymogen granule	4/1849	14/20331	0.0325106	Kcnq1/Rab5a/Reg1/Tmed10-ps
GO:0005814	centriole	17/1849	116/20331	0.0332584	Aurka/Bnip2/Birc5/Cep135/Cep162/Pcm1/Cep295/Fam161a/Cep55/Odf2l/Tedc1/Ttbk2/Cep19/2700049A03Rik/Cep152/Spice1/Cep290
GO:0001917	photoreceptor inner segment	8/1849	42/20331	0.0333387	Dynlt1c/Rdh12/Sptbn2/Nos1/Fam161a/2700049A03Rik/Rapgef4/Zbed4
GO:0098794	postsynapse	56/1849	482/20331	0.0340438	Wnt5a/Itga8/Ctnnb1/Dab1/Lrp4/Cyfip1/Kptn/Grin2d/Kcnb1/Igsf9b/Arf4/Ppp2ca/Dgkq/Map3k7/P2rx6/Nrp2/Arhgap32/Plcb4/Slc30a1/Prkn/Ppp1r9a/Syp/Sptbn2/Sipa1l1/Nos1/Begain/Lrfn4/Lrrc4b/Grin1/1700034H15Rik/Mtmr2/Mapt/Rab5a/Faim2/Entpd1/Ophn1/Shisa8/Nptn/Adam10/Cap2/Atp6ap2/Gper1/Rapgef4/Adcy1/Kcnc3/Fbxo45/Abhd17b/Cntn1/Cyp46a1/Ppp1r9b/Gm15483/Chrm1/Sh2d5/Hnrnpa3/Gphn/Mecp2
GO:0032993	protein-DNA complex	27/1849	206/20331	0.0342146	H2ac23/Ctc1/Ctnnb1/Cenpa/Ep300/H2ac18/H2bc12/H2ac11/H2bc21/H4c11/Gm47655/H2ac8/Terf1/Shprh/H4c8/H4c6/H4c2/H2bc13/H2ac25/H4c1/Rad52/H2ac6/H4c14/H2ac13/H2aj/H3c15/Terf2ip
GO:1903561	extracellular vesicle	12/1849	74/20331	0.0342396	Sord/Car4/Snx18/Ahnak/Ppp1cb/Scnn1a/H2ac8/Ddx11/Arrdc4/H2ac25/Tmem98/Psma5
GO:0030285	integral component of synaptic vesicle membrane	5/1849	21/20331	0.0366946	Stx6/Syngr1/Syp/Wfs1/Sv2a
GO:1905354	exoribonuclease complex	5/1849	21/20331	0.0366946	Exosc4/Gtpbp1/Mphosph6/Exosc8/Exosc3
GO:0098686	hippocampal mossy fiber to CA3 synapse	6/1849	28/20331	0.0370311	Grin2d/Gper1/Rapgef4/Adcy1/Sh3gl2/Unc13b
GO:0044815	DNA packaging complex	21/1849	154/20331	0.0395407	H2ac23/Cenpa/H2ac18/H2bc12/H2ac11/H2bc21/H4c11/Gm47655/H2ac8/Shprh/H4c8/H4c6/H4c2/H2bc13/H2ac25/H4c1/H2ac6/H4c14/H2ac13/H2aj/H3c15
GO:0043230	extracellular organelle	13/1849	84/20331	0.0396268	Sord/Car4/Snx18/Ahnak/Gbp3/Ppp1cb/Scnn1a/H2ac8/Ddx11/Arrdc4/H2ac25/Tmem98/Psma5
GO:0005938	cell cortex	25/1849	191/20331	0.0409161	Krt19/Fgf1/Marcks/Myh10/Ctnnb1/Rims2/Eno1b/Cd2ap/Shroom1/Arhgap32/Ppp1r9a/Melk/Sptbn2/Itgb4/Sapcd2/Scnn1a/Stimate/Mapre1/Dctn4/Plekhh2/Septin4/Kcnc3/Ppp1r9b/Unc13b/Pla2g4c
GO:0005782	peroxisomal matrix	4/1849	15/20331	0.0412252	Tysnd1/Gnpat/Lonp2/Nudt7
GO:0031907	microbody lumen	4/1849	15/20331	0.0412252	Tysnd1/Gnpat/Lonp2/Nudt7
GO:0098831	presynaptic active zone cytoplasmic component	3/1849	9/20331	0.0415446	Ctnnb1/Rims2/Unc13b
GO:0099571	postsynaptic cytoskeleton	3/1849	9/20331	0.0415446	Kptn/Ppp1r9a/Sptbn2
GO:0030672	synaptic vesicle membrane	11/1849	68/20331	0.0421679	Stx6/Syngr1/Prkn/Syp/Phaf1/Wfs1/Rab5a/Vamp2/Sv2a/Sh3gl2/Unc13b
GO:0099501	exocytic vesicle membrane	11/1849	68/20331	0.0421679	Stx6/Syngr1/Prkn/Syp/Phaf1/Wfs1/Rab5a/Vamp2/Sv2a/Sh3gl2/Unc13b
GO:0031305	integral component of mitochondrial inner membrane	6/1849	29/20331	0.0432243	Mpc1/Chchd10/Timm17b/Gm46840/Immt/Sfxn3
GO:0005608	laminin-3 complex	2/1849	4/20331	0.0437973	Lamb2/Lama1
GO:0070187	shelterin complex	2/1849	4/20331	0.0437973	Terf1/Terf2ip
GO:0097418	neurofibrillary tangle	2/1849	4/20331	0.0437973	Nefm/Mapt
GO:0031461	cullin-RING ubiquitin ligase complex	18/1849	129/20331	0.0443857	Fbxo31/Katna1/Cul4a/Dda1/Dtl/Cdkn1b/Anapc16/Klhl7/Fbxo33/Dcaf6/Cul1/Klhl42/Cul7/Klhl8/Usp47/Klhl13/Klhl9/Trim21
GO:0000922	spindle pole	19/1849	138/20331	0.0445806	Ckap2l/Katna1/Aurka/Tubgcp4/Bnip2/Cenpf/Ppp2ca/Prc1/Tubgcp2/Smc6/Ddx11/Fam161a/Tnks/Spdl1/Cep19/Dctn4/Ikbkg/Gm5808/Rmdn1
GO:0015629	actin cytoskeleton	39/1849	325/20331	0.0450783	Parva/Krt19/Marcks/Myh10/Kptn/Wipf1/Cd2ap/Shroom1/Pawr/Ahnak/Spry2/Arhgap32/Ppp1r9a/Sptbn2/Sipa1l1/Cttnbp2nl/Pdxp/Zfp174/Myo19/Sh3pxd2b/Arhgap6/Scnn1a/Limch1/Vcl/Rab5a/Capza2/Ophn1/Stk17b/Cdc42bpa/Ehbp1/Dctn4/Plekhh2/Tnnt3/Avil/Ppp1r9b/Tnni2/Synpo2/Actr3/Tnni1
GO:0005730	nucleolus	76/1849	690/20331	0.045781	Cpt2/Rnf213/Phf8/Nop2/Leo1/Aff4/Pomt2/Letmd1/Zcchc4/Mrm2/Polr2i/Tut1/Camta1/Rbm19/Imp4/Cd2ap/Mtus1/Frg1/Snrnp35/Exosc4/Wdr75/Dtl/Nol9/Arhgap32/Chd7/Hspb6/Utp4/Mrps31/Nifk/Meak7/Nufip1/Ell3/Itgb4/Klhl7/Ppp1cb/Isg20/Mphosph6/Sapcd2/Gorab/Bcl6/Uchl5/Thap1/Ercc6/Ddx11/Terf1/Ier5/Zfp655/Zfp346/Setd7/Gm2788/E2f5/Cc2d1a/Pak6/Wdr36/Toe1/Rps19bp1/Selenbp1/Akap11/Tsen2/Rtl8a/Pwp1/Utp15/Gper1/Gm20156/Surf2/…
GO:0070062	extracellular exosome	11/1849	69/20331	0.0462105	Sord/Car4/Snx18/Ahnak/Ppp1cb/Scnn1a/H2ac8/Ddx11/H2ac25/Tmem98/Psma5
GO:0030176	integral component of endoplasmic reticulum membrane	16/1849	112/20331	0.0465114	Elovl6/Hspa5/Edem1/Hacd2/Pdia3/Dolk/Caml/Dhcr7/Pigg/Slc37a3/Elovl5/Saraf/Wfs1/Sacm1l/Mmgt2/Zfyve27
GO:0098636	protein complex involved in cell adhesion	7/1849	37/20331	0.0465595	Itga8/Itga1/Itgal/Itgax/Itgb4/Itga11/Itgam
GO:0016324	apical plasma membrane	33/1849	269/20331	0.0475825	Kcnq1/Car4/Slc2a2/Gpihbp1/Birc5/Podxl/Pdia3/Shroom1/Slc26a6/Igfbp2/Rab18/Sptbn2/Slc5a12/Sapcd2/Scnn1a/Il18/Pld1/F2rl2/Slc26a3/Cd55/Cyp4f18/Aqp8/Slc23a2/Cldnd1/Zmynd10/Slc5a8/Atp6ap2/Rapgef4/Abcg2/Ceacam20/Dstyk/Ocln/Tgfbr1
GO:0008287	protein serine/threonine phosphatase complex	8/1849	45/20331	0.0479232	Ppp2ca/Ppp1cb/Tox4/Ppp1r3d/Ier5/Shoc2/Cnep1r1/Ppp2r2c
GO:1903293	phosphatase complex	8/1849	45/20331	0.0479232	Ppp2ca/Ppp1cb/Tox4/Ppp1r3d/Ier5/Shoc2/Cnep1r1/Ppp2r2c
GO:0031594	neuromuscular junction	9/1849	53/20331	0.0480469	Lrp4/Syngr1/Lamb2/Ppp1r9a/Syp/Postn/Kcnc3/Sv2a/Unc13b
GO:0062023	collagen-containing extracellular matrix	33/1849	270/20331	0.0496618	Gm12854/Fgf9/Lamb2/Ccn1/Dpt/Dcn/Lama1/Ltbp1/Itih5/Ecm2/Spock2/Col6a2/Col15a1/Smoc2/Itgb4/Lamb3/Serpinb1a/Fgl2/Mgp/Reg1/Ccdc80/Entpd1/Postn/Col8a1/Adam10/Col16a1/Rell2/Col8a2/Gm10069/Kazald1/Itih4/Timp1/Adamts8
GO:0031304	intrinsic component of mitochondrial inner membrane	6/1849	30/20331	0.0500283	Mpc1/Chchd10/Timm17b/Gm46840/Immt/Sfxn3
GO:0005614	interstitial matrix	4/1849	16/20331	0.0511291	Ecm2/Smoc2/Ccdc80/Kazald1
GO:0060077	inhibitory synapse	4/1849	16/20331	0.0511291	Rims2/Igsf9b/Nptn/Gphn
GO:0098687	chromosomal region	29/1849	233/20331	0.0516641	Ctc1/Cenpa/Zfp618/Cenpf/Ppp2ca/Birc5/Scmh1/Rec8/Zbtb48/Nup160/Zwint/Anapc16/Gm33950/Smc6/Terf1/Tnks/Spdl1/Nsl1/Ss18l1/Dctn4/Spc25/Cenpo/Dydc2/2700099C18Rik/Dnmt3b/Pif1/Sgo2a/Terf2ip/Suv39h1
GO:0044232	organelle membrane contact site	5/1849	23/20331	0.0522155	Clcc1/Stimate/Saraf/Tmem41b/Sacm1l
GO:0045202	synapse	98/1849	918/20331	0.0522616	Snph/Wnt5a/Itga8/Ctnnb1/Dab1/Lrp4/Cyfip1/Bltp1/Kptn/Stx6/Rims2/Syngr1/Grin2d/Kcnb1/Igsf9b/Tbc1d24/Lamb2/Tac1/Nipsnap1/Aldh1a1/Arf4/Eno1b/Ppp2ca/Gucy1a1/Dgkq/Cops5/Map3k7/P2rx6/Nrp2/Arhgap32/Plcb4/Slc30a1/Rab18/Elk1/Nr4a1/Prkn/Npy/Ppp1r9a/Syp/Nufip1/Sptbn2/Gnb5/Sipa1l1/Nos1/Begain/Lrfn4/Phaf1/Nt5e/Ptprn/Pnisr/Lrrc4b/Grin1/Pld1/1700034H15Rik/Mtmr2/Gm46878/Mapt/Sgip1/Wfs1/Rab5a/Ly6g2/Faim2/Cdh13/Ent…
GO:0097060	synaptic membrane	35/1849	291/20331	0.0536938	Snph/Itga8/Ctnnb1/Lrp4/Rims2/Grin2d/Kcnb1/Igsf9b/Nipsnap1/Eno1b/P2rx6/Nrp2/Slc30a1/Syp/Lrfn4/Nt5e/Lrrc4b/Grin1/1700034H15Rik/Mtmr2/Faim2/Entpd1/Shisa8/Adam23/Nptn/Adam10/Atp6ap2/Gper1/Adcy1/Kcnc3/Cntn1/Ppp1r9b/Chrm1/Unc13b/Gphn
GO:0098797	plasma membrane protein complex	46/1849	398/20331	0.0543343	Krt19/Kcnq1/Itga8/Ctnnb1/Grin2d/Cdh17/Kcnb1/Itga1/Gjb1/Noxo1/Casp8/Traf3/Slc5a3/Itgal/Lrrc26/Itgax/Kcng1/Noxa1/Catspere2/Gnb5/Wnt9b/Itgb4/Scnn1a/Gng4/Cacna1b/Sgip1/Gnao1/Cdh13/Gjc2/Itga11/Kcnmb3/Gjb2/Shisa8/Kcne3/Cachd1/Gng11/Calcrl/Gja4/Kcnc3/Sacm1l/C6/Itgam/Tmed10-ps/Tgfbr1/Scn8a/Cacna2d4
GO:0005604	basement membrane	13/1849	88/20331	0.0545137	Fgf9/Lamb2/Lama1/Col15a1/Smoc2/Itgb4/Lamb3/Ccdc80/Entpd1/Col8a1/Rell2/Col8a2/Timp1
GO:0005773	vacuole	49/1849	428/20331	0.0553636	Lamtor5/Gaa/Ifitm2/Kcnq1/Hps4/Abca2/Entpd4/6330537M06Rik/Ap5m1/Hps6/Entpd4b/Rps6kc1/Nbr1/Meak7/Peg3/Nos1/Rab9/Tmem106b/Serpinb1a/Borcs7/Ctsl/Mtmr2/Lmbrd1/Tmem165/Abca3/Tnfaip3/Prtn3/Ubqln2/Mios/Tmem9/Tmem199/Mcoln2/Laptm4b/Pip4p2/Ada/Atp6ap2/Calcrl/Fyco1/Cd164/Sort1/Glb1/Glmp/Vps33a/Borcs6/Ocln/Laptm5/Cpq/Ctso/Sidt1
GO:0042589	zymogen granule membrane	3/1849	10/20331	0.0554292	Kcnq1/Rab5a/Tmed10-ps
GO:0097470	ribbon synapse	3/1849	10/20331	0.0554292	Rims2/Sh3gl2/Unc13b
GO:0010008	endosome membrane	31/1849	254/20331	0.05653	Lamtor5/Wdr44/Ifitm2/Ap5m1/Hps6/Arhgap32/Clvs1/Chmp1b/Uevld/Tmem106b/Mtmr2/Rab5a/Tmem165/Abca3/Mcoln2/Laptm4b/Zfyve16/Pip4p2/Atp6ap2/Ubap1/Cd164/Sort1/Abhd17b/Tlr13/Tm9sf2/Vps33a/Gm32391/Mmgt2/Zfyve27/Rnft1/Plekhf2
GO:0044798	nuclear transcription factor complex	18/1849	133/20331	0.0569434	Hmga1b/Ctnnb1/Taf5l/Wwox/Myocd/Rfxap/Gtf2a2/Pou2af1/Tcf15/Rfx5/Smad9/E2f5/Snapc4/Brf2/Med18/Adnp/Mxd3/Taf13
GO:0008021	synaptic vesicle	17/1849	124/20331	0.0570121	Stx6/Syngr1/Cops5/Prkn/Syp/Sptbn2/Phaf1/Mtmr2/Wfs1/Rab5a/Entpd1/Adam10/Septin4/Vamp2/Sv2a/Sh3gl2/Unc13b
GO:0005774	vacuolar membrane	26/1849	207/20331	0.0573075	Gaa/Ifitm2/Hps4/Entpd4/Ap5m1/Hps6/Entpd4b/Meak7/Tmem106b/Borcs7/Mtmr2/Lmbrd1/Tmem165/Abca3/Mios/Tmem9/Tmem199/Laptm4b/Pip4p2/Atp6ap2/Cd164/Sort1/Glmp/Vps33a/Borcs6/Ocln
GO:0030424	axon	53/1849	469/20331	0.0581093	Gdpd5/Katna1/Cyfip1/Prph/Aurka/Dynlt1c/Kcnb1/Tac1/Aldh1a1/Eno1b/Slc38a2/Cd2ap/Ppp2ca/Nmnat3/Mast1/Nefm/Pawr/Nrp2/Bloc1s6/Elk1/Prkn/Npy/Ppp1r9a/Syp/Pcp4/Nos1/Amigo1/Spast/Aatk/Vstm5/Lrrc4b/Mtmr2/Mapt/Rab5a/Reg1/Slc12a6/Ophn1/Nptn/Adam10/Atp6ap2/Adnp/Gper1/Rapgef4/Septin4/Kcnc3/Avil/Zc3h14/Abitram/Ppp1r9b/Dpysl2/Gm35065/Unc13b/Zfyve27
GO:0000315	organellar large ribosomal subunit	9/1849	55/20331	0.0586987	Mrpl47/Mrpl16/Mrpl36/Mrpl44/Ndufab1/Mrpl32/Mrpl15/Mrpl3/Nsun4
GO:0005762	mitochondrial large ribosomal subunit	9/1849	55/20331	0.0586987	Mrpl47/Mrpl16/Mrpl36/Mrpl44/Ndufab1/Mrpl32/Mrpl15/Mrpl3/Nsun4
GO:0032592	integral component of mitochondrial membrane	9/1849	55/20331	0.0586987	Mpc1/Chchd10/Timm17b/Gm46840/Adck1/Cpt1a/Rhot1/Immt/Sfxn3
GO:1902554	serine/threonine protein kinase complex	8/1849	47/20331	0.0596454	Ccnd1/Ccni/Map3k7/Ccne2/Sesn2/Phkb/Ikbkg/Tgfbr1
GO:0000776	kinetochore	15/1849	107/20331	0.0603662	Cenpa/Cenpf/Birc5/Rec8/Nup160/Zwint/Anapc16/Spdl1/Nsl1/Ss18l1/Dctn4/Spc25/Cenpo/2700099C18Rik/Sgo2a
GO:0072686	mitotic spindle	17/1849	125/20331	0.0606423	Ckap2l/Poldip2/Katna1/Aurka/Haus2/Prc1/Wapl/Cep295/Iqcb1/Togaram1/Smc6/Fam161a/Tnks/Mapre1/Togaram2/Ikbkg/Rmdn1
GO:0080008	Cul4-RING E3 ubiquitin ligase complex	5/1849	24/20331	0.0612068	Cul4a/Dda1/Dtl/Cdkn1b/Dcaf6
GO:0098573	intrinsic component of mitochondrial membrane	9/1849	56/20331	0.0645503	Mpc1/Chchd10/Timm17b/Gm46840/Adck1/Cpt1a/Rhot1/Immt/Sfxn3
GO:0090575	RNA polymerase II transcription factor complex	16/1849	117/20331	0.0645806	Hmga1b/Ctnnb1/Taf5l/Wwox/Myocd/Rfxap/Gtf2a2/Pou2af1/Tcf15/Rfx5/Smad9/E2f5/Med18/Adnp/Mxd3/Taf13
GO:0030864	cortical actin cytoskeleton	7/1849	40/20331	0.0666882	Krt19/Shroom1/Ppp1r9a/Sptbn2/Scnn1a/Plekhh2/Ppp1r9b
GO:0000347	THO complex	2/1849	5/20331	0.0686455	Thoc2l/Thoc2
GO:0001674	female germ cell nucleus	2/1849	5/20331	0.0686455	Marcks/Aurka
GO:0005916	fascia adherens	2/1849	5/20331	0.0686455	Ctnnb1/Dsp
GO:0031262	Ndc80 complex	2/1849	5/20331	0.0686455	Spc25/2700099C18Rik
GO:0031617	NMS complex	2/1849	5/20331	0.0686455	Spc25/2700099C18Rik
GO:0045261	proton-transporting ATP synthase complex, catalytic core F(1)	2/1849	5/20331	0.0686455	Atp5d/Atp5b
GO:0031227	intrinsic component of endoplasmic reticulum membrane	16/1849	118/20331	0.0686943	Elovl6/Hspa5/Edem1/Hacd2/Pdia3/Dolk/Caml/Dhcr7/Pigg/Slc37a3/Elovl5/Saraf/Wfs1/Sacm1l/Mmgt2/Zfyve27
GO:0042470	melanosome	11/1849	74/20331	0.0703624	Gchfr/Syngr1/Hps4/Ywhab/Pdia3/Rab9/Mreg/Cct4/Rab5a/Tyr/Tmed10-ps
GO:0048770	pigment granule	11/1849	74/20331	0.0703624	Gchfr/Syngr1/Hps4/Ywhab/Pdia3/Rab9/Mreg/Cct4/Rab5a/Tyr/Tmed10-ps
GO:0032809	neuronal cell body membrane	5/1849	25/20331	0.0710166	Kcnb1/Amigo1/Reg1/Kcne3/Kcnc3
GO:0005689	U12-type spliceosomal complex	3/1849	11/20331	0.0712082	Snrnp48/Snrnp35/Rbm41
GO:0005883	neurofilament	3/1849	11/20331	0.0712082	Nefm/Pcp4/Nefh
GO:0016442	RISC complex	3/1849	11/20331	0.0712082	Ago4/Dcp2/Ago1
GO:0031082	BLOC complex	3/1849	11/20331	0.0712082	Hps4/Hps6/Bloc1s6
GO:0031332	RNAi effector complex	3/1849	11/20331	0.0712082	Ago4/Dcp2/Ago1
GO:0032045	guanyl-nucleotide exchange factor complex	3/1849	11/20331	0.0712082	Dock1/Eif2b3/Rasgrp3
GO:0071565	nBAF complex	3/1849	11/20331	0.0712082	Dpf1/Ss18l1/Dpf3
GO:0000313	organellar ribosome	12/1849	83/20331	0.0718993	Mrps34/Mrpl47/Mrpl16/Mrpl36/Mrpl44/Ndufab1/Mrpl32/Mrps31/Mrpl15/Mrpl3/Mrps2/Nsun4
GO:0005761	mitochondrial ribosome	12/1849	83/20331	0.0718993	Mrps34/Mrpl47/Mrpl16/Mrpl36/Mrpl44/Ndufab1/Mrpl32/Mrps31/Mrpl15/Mrpl3/Mrps2/Nsun4
GO:1905368	peptidase complex	12/1849	83/20331	0.0718993	Psma4/Psmd6/Spcs2-ps/Spcs3/Uchl5/Psmd10/Psme4/Rad23a/Atxn7l3/Adrm1/Psma5/Supt20
GO:0000775	chromosome, centromeric region	21/1849	165/20331	0.0725257	Cenpa/Zfp618/Cenpf/Ppp2ca/Birc5/Rec8/Nup160/Zwint/Anapc16/Gm33950/Smc6/Spdl1/Nsl1/Ss18l1/Dctn4/Spc25/Cenpo/2700099C18Rik/Dnmt3b/Sgo2a/Suv39h1
GO:0044853	plasma membrane raft	13/1849	93/20331	0.0779301	Cavin2/Ctnnb1/Lrp4/Cd177/Rangrf/Slc27a1/Cdh13/Prtn3/Spred1/Cav3/Tgfbr1/Bves/Nos3
GO:0070161	anchoring junction	53/1849	479/20331	0.0781467	Parva/Poldip2/Cldn3/Ctnnb1/Eppk1/Wtip/Gm53915/Slc2a2/Lmln/Rangrf/Stard8/Cd2ap/Sh3bp1/Lama1/Gjb1/Shroom1/Ahnak/Pkp2/Tjp1/Klf11/Itgb4/Pdxp/Ppp1cb/Sapcd2/Cldn2/Tln2/Dcaf6/Mtf2/Cd53/Arvcf/Vcl/Epha2/Gjc2/Itga11/Gjb2/Cdc42bpa/Adam10/Mapre1/Dctn4/Atp7b/Sh3kbp1/Gja4/Prkch/Avil/Sv2a/Ppp1r9b/Ocln/Nectin2/Il1rl1/Tgfbr1/Bves/Dsp/Synpo2
GO:0150034	distal axon	26/1849	214/20331	0.0786148	Gdpd5/Katna1/Cyfip1/Dynlt1c/Eno1b/Ppp2ca/Elk1/Prkn/Npy/Ppp1r9a/Syp/Nos1/Aatk/Mapt/Rab5a/Reg1/Ophn1/Gper1/Rapgef4/Kcnc3/Abitram/Ppp1r9b/Dpysl2/Gm35065/Unc13b/Zfyve27
GO:0044298	cell body membrane	5/1849	26/20331	0.0816344	Kcnb1/Amigo1/Reg1/Kcne3/Kcnc3
GO:0099061	integral component of postsynaptic density membrane	7/1849	42/20331	0.0826102	Grin2d/Slc30a1/Lrfn4/Lrrc4b/1700034H15Rik/Nptn/Adcy1
GO:0005901	caveola	10/1849	68/20331	0.0867112	Cavin2/Ctnnb1/Rangrf/Slc27a1/Cdh13/Spred1/Cav3/Tgfbr1/Bves/Nos3
GO:0030117	membrane coat	10/1849	68/20331	0.0867112	Ap4s1/Copg2/Tmed3/Copb2/Ap5m1/Epn2/Sec24b/Sgip1/Aftph/Ap1m2
GO:0048475	coated membrane	10/1849	68/20331	0.0867112	Ap4s1/Copg2/Tmed3/Copb2/Ap5m1/Epn2/Sec24b/Sgip1/Aftph/Ap1m2
GO:0015630	microtubule cytoskeleton	101/1849	973/20331	0.0867551	Fbxo31/Snph/Wdr44/Pdzd11/Ckap2l/Leo1/Poldip2/Marcks/Mtus2/Katna1/Ctnnb1/Ddx3x/Aurka/Dynlt1c/Reep2/Slain2/Dysf/Tubgcp4/Bnip2/Dnal4/Cenpf/Cd2ap/Ppp2ca/Kifap3/Mtus1/Ror2/Birc5/Rnf4/Shroom1/Haus2/Dtl/Cep135/Mid1/Prc1/Spry2/Cep162/Pcm1/Kif2c/Wapl/Cep295/Tubgcp2/Iqcb1/Kifc2/Ift56/Spast/Togaram1/Smc6/Gm47324/Rita1/Ddx11/Terf1/Cct4/Dnaaf2/Pde4dip/Pik3r5/Iqcd/Nme7/Gas8/Mapt/Mzt1/Ythdf2/Fam161a/Cep55/Gm467…
GO:0099503	secretory vesicle	47/1849	423/20331	0.0876902	Nudt1/Rph3al/Kcnq1/Cd177/Car4/Stx6/Dynlt1c/Syngr1/Ltf/Hps4/Pdia3/Cops5/Pomt1/Lyz1/Klk1/Prkn/Npy/Syp/Sptbn2/Nos1/Fstl4/Gip/Phaf1/Scnn1a/Ptprn/Ebag9/Mtmr2/Wfs1/Rab5a/Reg1/Penk/Abca3/Entpd1/Prtn3/Ica1/Adam10/Septin4/Vamp2/Sv2a/Sh3gl2/Tmed10-ps/Tbxa2r/Unc13b/Scg5/Olfm4/Dennd4c/Psma5
GO:0000407	phagophore assembly site	4/1849	19/20331	0.0877951	Atg2b/Nbr1/Phaf1/Trappc8
GO:0008076	voltage-gated potassium channel complex	8/1849	51/20331	0.0880783	Kcnq1/Kcnb1/Slc5a3/Lrrc26/Kcng1/Kcnmb3/Kcne3/Kcnc3
GO:0043679	axon terminus	14/1849	104/20331	0.0885049	Cyfip1/Ppp2ca/Elk1/Prkn/Npy/Syp/Nos1/Rab5a/Ophn1/Gper1/Rapgef4/Kcnc3/Gm35065/Unc13b
GO:0002144	cytosolic tRNA wobble base thiouridylase complex	1/1849	1/20331	0.0909449	Ctu1
GO:0005589	collagen type VI trimer	1/1849	1/20331	0.0909449	Dcn
GO:0005606	laminin-1 complex	1/1849	1/20331	0.0909449	Lama1
GO:0005953	CAAX-protein geranylgeranyltransferase complex	1/1849	1/20331	0.0909449	Pggt1b
GO:0008074	guanylate cyclase complex, soluble	1/1849	1/20331	0.0909449	Gucy1a1
GO:0016507	mitochondrial fatty acid beta-oxidation multienzyme complex	1/1849	1/20331	0.0909449	Hadhb
GO:0016939	kinesin II complex	1/1849	1/20331	0.0909449	Kifap3
GO:0031084	BLOC-2 complex	1/1849	1/20331	0.0909449	Hps6
GO:0031085	BLOC-3 complex	1/1849	1/20331	0.0909449	Hps4
GO:0031467	Cul7-RING ubiquitin ligase complex	1/1849	1/20331	0.0909449	Cul7
GO:0031510	SUMO activating enzyme complex	1/1849	1/20331	0.0909449	Uba2
GO:0033065	Rad51C-XRCC3 complex	1/1849	1/20331	0.0909449	Xrcc3
GO:0034388	Pwp2p-containing subcomplex of 90S preribosome	1/1849	1/20331	0.0909449	Wdr36
GO:0034750	Scrib-APC-beta-catenin complex	1/1849	1/20331	0.0909449	Ctnnb1
GO:0034990	nuclear mitotic cohesin complex	1/1849	1/20331	0.0909449	Rec8
GO:0036125	fatty acid beta-oxidation multienzyme complex	1/1849	1/20331	0.0909449	Hadhb
GO:0038045	large latent transforming growth factor-beta complex	1/1849	1/20331	0.0909449	Ltbp1
GO:0043509	activin A complex	1/1849	1/20331	0.0909449	Inhba
GO:0045298	tubulin complex	1/1849	1/20331	0.0909449	Mapt
GO:0048180	activin complex	1/1849	1/20331	0.0909449	Inhba
GO:0070176	DRM complex	1/1849	1/20331	0.0909449	Lin52
GO:0070514	SRF-myogenin-E12 complex	1/1849	1/20331	0.0909449	Myocd
GO:0072380	TRC complex	1/1849	1/20331	0.0909449	Sgtb
GO:0097134	cyclin E1-CDK2 complex	1/1849	1/20331	0.0909449	Ccne2
GO:0097135	cyclin E2-CDK2 complex	1/1849	1/20331	0.0909449	Ccne2
GO:0097362	MCM8-MCM9 complex	1/1849	1/20331	0.0909449	Mcm8
GO:0097451	glial limiting end-foot	1/1849	1/20331	0.0909449	Adgrg1
GO:0097513	myosin II filament	1/1849	1/20331	0.0909449	Myh10
GO:0098647	collagen beaded filament	1/1849	1/20331	0.0909449	Dcn
GO:0099073	mitochondrion-derived vesicle	1/1849	1/20331	0.0909449	Prkn
GO:0099189	postsynaptic spectrin-associated cytoskeleton	1/1849	1/20331	0.0909449	Sptbn2
GO:0120205	photoreceptor proximal connecting cilium	1/1849	1/20331	0.0909449	Cep290
GO:0140007	KICSTOR complex	1/1849	1/20331	0.0909449	Kptn
GO:1904423	dehydrodolichyl diphosphate synthase complex	1/1849	1/20331	0.0909449	Nus1
GO:1990030	pericellular basket	1/1849	1/20331	0.0909449	Amigo1
GO:1990578	perinuclear endoplasmic reticulum membrane	1/1849	1/20331	0.0909449	Mogat2
GO:1990761	growth cone lamellipodium	1/1849	1/20331	0.0909449	Ppp1r9a
GO:1990780	cytoplasmic side of dendritic spine plasma membrane	1/1849	1/20331	0.0909449	Ppp1r9b
GO:1990923	PET complex	1/1849	1/20331	0.0909449	Exd1
GO:0030863	cortical cytoskeleton	9/1849	60/20331	0.0915312	Krt19/Rims2/Shroom1/Ppp1r9a/Sptbn2/Scnn1a/Mapre1/Plekhh2/Ppp1r9b
GO:0000151	ubiquitin ligase complex	25/1849	208/20331	0.0915385	Fbxo31/Katna1/Ubr3/Cul4a/Dda1/Dtl/Cdkn1b/Prkn/Anapc16/Klhl7/Fbxo33/Cbx2/Fam8a1/Dcaf6/Cul1/Klhl42/Cul7/Klhl8/Med18/Usp47/Dcun1d4/Ikbkg/Klhl13/Klhl9/Trim21
GO:0099738	cell cortex region	5/1849	27/20331	0.0930431	Ctnnb1/Rims2/Eno1b/Sapcd2/Unc13b
GO:0097431	mitotic spindle pole	6/1849	35/20331	0.0933697	Katna1/Aurka/Smc6/Fam161a/Tnks/Rmdn1
GO:0005788	endoplasmic reticulum lumen	12/1849	87/20331	0.0949117	Hspa5/Wnt5a/Ces1e/Dnajc10/Pdia3/Lyz1/H6pd/Minpp1/Erap1/Edem2/Bche/Tmem43
GO:0030425	dendrite	51/1849	466/20331	0.095179	Gchfr/Lrp4/Cyfip1/Kcnb1/Igsf9b/Arf4/Slc38a2/Cd2ap/Ror2/Mast1/Ltbp1/P2rx6/Arhgap32/Plcb4/Zwint/Elk1/Ppp1r9a/Gpr179/Sipa1l1/Nos1/Amigo1/Ephb3/Begain/Phaf1/Aatk/Vstm5/Elovl5/Mtmr2/Mapt/Wfs1/Rab5a/Gnao1/Ophn1/Nptn/Kcne3/Ada/Adam10/Adnp/Gper1/Rapgef4/Septin4/Sort1/Zc3h14/Abitram/Sv2a/Cyp46a1/Ppp1r9b/Sh3gl2/Gm35065/Gphn/Zfyve27
GO:0002199	zona pellucida receptor complex	2/1849	6/20331	0.0968834	Cct4/Hspa1l
GO:0032009	early phagosome	2/1849	6/20331	0.0968834	Rab5a/Unc13b
GO:0033588	Elongator holoenzyme complex	2/1849	6/20331	0.0968834	Kti12/Elp1
GO:0042587	glycogen granule	2/1849	6/20331	0.0968834	Ppp1cb/Ppp1r3d
GO:0061700	GATOR2 complex	2/1849	6/20331	0.0968834	Sesn3/Mios
GO:0090571	RNA polymerase II transcription repressor complex	2/1849	6/20331	0.0968834	Lin52/Etv3
GO:0098684	photoreceptor ribbon synapse	2/1849	6/20331	0.0968834	Rims2/Sh3gl2
GO:0098871	postsynaptic actin cytoskeleton	2/1849	6/20331	0.0968834	Kptn/Ppp1r9a
GO:0097447	dendritic tree	51/1849	467/20331	0.0978057	Gchfr/Lrp4/Cyfip1/Kcnb1/Igsf9b/Arf4/Slc38a2/Cd2ap/Ror2/Mast1/Ltbp1/P2rx6/Arhgap32/Plcb4/Zwint/Elk1/Ppp1r9a/Gpr179/Sipa1l1/Nos1/Amigo1/Ephb3/Begain/Phaf1/Aatk/Vstm5/Elovl5/Mtmr2/Mapt/Wfs1/Rab5a/Gnao1/Ophn1/Nptn/Kcne3/Ada/Adam10/Adnp/Gper1/Rapgef4/Septin4/Sort1/Zc3h14/Abitram/Sv2a/Cyp46a1/Ppp1r9b/Sh3gl2/Gm35065/Gphn/Zfyve27
GO:0044306	neuron projection terminus	15/1849	115/20331	0.0984864	Cyfip1/Ppp2ca/Elk1/Prkn/Npy/Syp/Nos1/Rab5a/Ophn1/Gper1/Ptger4/Rapgef4/Kcnc3/Gm35065/Unc13b
GO:0005903	brush border	11/1849	79/20331	0.10137	Sis/Dab1/Slc28a2/Car4/Slc2a2/Slc38a2/Slc26a6/Slc26a3/Soat2/Slc5a8/Rapgef4
GO:0019005	SCF ubiquitin ligase complex	6/1849	36/20331	0.103877	Fbxo31/Cul4a/Fbxo33/Cul1/Usp47/Trim21
GO:0030496	midbody	15/1849	116/20331	0.104108	Hspa5/Poldip2/Myh10/Katna1/Cenpf/Birc5/Prc1/Pdxp/Spast/Ddx11/Cep55/Agbl5/Klhl13/Klhl9/Kif20a
GO:0031253	cell projection membrane	27/1849	231/20331	0.105832	Itga8/Ctnnb1/Slc28a2/Car4/Slc2a2/Kcnb1/Arf4/Slc26a6/Spry2/Plekha1/Txndc15/Pdxp/Scnn1a/Slc26a3/Mapt/Reg1/Epha2/Shisa8/Mapre1/Slc5a8/Atp6ap2/Gper1/Kcnc3/Ceacam20/Prom1/Ppp1r9b/Bves
GO:0000164	protein phosphatase type 1 complex	3/1849	13/20331	0.10787	Ppp1cb/Ppp1r3d/Shoc2
GO:0005865	striated muscle thin filament	3/1849	13/20331	0.10787	Tnnt3/Tnni2/Tnni1
GO:0099146	intrinsic component of postsynaptic density membrane	7/1849	45/20331	0.110215	Grin2d/Slc30a1/Lrfn4/Lrrc4b/1700034H15Rik/Nptn/Adcy1
GO:0005874	microtubule	38/1849	341/20331	0.110958	Snph/Wdr44/Pdzd11/Mtus2/Katna1/Aurka/Dynlt1c/Reep2/Tubgcp4/Dnal4/Kifap3/Ror2/Birc5/Rnf4/Shroom1/Haus2/Mid1/Prc1/Spry2/Cep162/Kif2c/Cep295/Tubgcp2/Kifc2/Spast/Togaram1/Cct4/Gas8/Mapt/Fam161a/Gm46764/Ninl/Mapre1/Hook1/Togaram2/Tbca/Rmdn1/Kif20a
GO:0008023	transcription elongation factor complex	6/1849	37/20331	0.11497	Leo1/Aff4/Ell2/Nufip1/Ell3/Ercc6
GO:0060076	excitatory synapse	6/1849	37/20331	0.11497	Cyfip1/P2rx6/Plcb4/Syp/Sptbn2/Rapgef4
GO:0005793	endoplasmic reticulum-Golgi intermediate compartment	11/1849	81/20331	0.115717	Hspa5/Car4/Tmed3/Vma21/Nat8/Rgmb/Tmem199/Tmed7/Stk17b/Nucb2/Tmed10-ps
GO:0098791	Golgi subcompartment	26/1849	224/20331	0.117481	Ap4s1/Smpd3/Galnt1/Tmbim4/Car4/Stx6/Tgoln1/B4galt2/Tmed3/Lyz1/Clvs1/Yipf6/Phaf1/Tmem165/Postn/Aftph/Adam10/Nucb2/Atp7b/Gper1/Fut7/Sort1/Gm32391/Slc66a2/Atp2c2/B4galt4
GO:0005922	connexin complex	4/1849	21/20331	0.117621	Gjb1/Gjc2/Gjb2/Gja4
GO:0090568	nuclear transcriptional repressor complex	4/1849	21/20331	0.117621	Lin52/Csnk2a1-ps3/Rbbp7/Etv3
GO:0031012	extracellular matrix	41/1849	374/20331	0.12103	Wnt5a/Mmp2/Crispld2/Gm12854/Fgf9/Lamb2/Ccn1/Dpt/Dcn/Lama1/Ltbp1/Itih5/Ecm2/Spock2/Col6a2/Col15a1/Smoc2/Itgb4/Lamb3/Serpinb1a/Fgl2/Mgp/Reg1/Ccdc80/Entpd1/Postn/Col8a1/Zan/Muc5b/Adam10/Col16a1/Rell2/Col8a2/Gm10069/Thsd4/Kazald1/Itih4/Gp1ba/Adamts19/Timp1/Adamts8
GO:0017053	transcriptional repressor complex	8/1849	55/20331	0.123145	Ccnd1/Lin52/Ywhab/Prdm10/Arid4a/Csnk2a1-ps3/Rbbp7/Etv3
GO:0045178	basal part of cell	8/1849	55/20331	0.123145	Kcnq1/Eppk1/Slc27a1/Itgb4/Reg1/Kcne3/Slc23a2/Gkn2
GO:1902911	protein kinase complex	8/1849	55/20331	0.123145	Ccnd1/Ccni/Map3k7/Ccne2/Sesn2/Phkb/Ikbkg/Tgfbr1
GO:0005770	late endosome	20/1849	167/20331	0.123867	Lamtor5/Rnf128/Ifitm2/Kcnq1/Dysf/Ap5m1/Nbr1/Chmp1b/Uevld/Rab9/Tmem106b/Tmem165/Abca3/Slc31a2/Laptm4b/Pip4p2/Atp7b/Fyco1/Vps33a/Ankrd13b
GO:0030662	coated vesicle membrane	9/1849	64/20331	0.124211	Tmed3/Copb2/Vma21/Epn2/Syp/Sec24b/Sgip1/Aftph/Tmem199
GO:0031256	leading edge membrane	14/1849	110/20331	0.124679	Itga8/Kcnb1/Arf4/Spry2/Plekha1/Pdxp/Mapt/Reg1/Epha2/Shisa8/Atp6ap2/Gper1/Kcnc3/Ppp1r9b
GO:0030120	vesicle coat	6/1849	38/20331	0.126632	Tmed3/Copb2/Epn2/Sec24b/Sgip1/Aftph
GO:0030315	T-tubule	6/1849	38/20331	0.126632	Dysf/Slc30a1/Lman2l/Nos1/1700034H15Rik/Fer1l5
GO:0033116	endoplasmic reticulum-Golgi intermediate compartment membrane	6/1849	38/20331	0.126632	Tmed3/Vma21/Nat8/Tmem199/Tmed7/Tmed10-ps
GO:1902562	H4 histone acetyltransferase complex	6/1849	38/20331	0.126632	Pole4/Morf4l1-ps1/Map3k7/Phf20l1/Zzz3/Kat14
GO:0001527	microfibril	2/1849	7/20331	0.12769	Ltbp1/Thsd4
GO:0019773	proteasome core complex, alpha-subunit complex	2/1849	7/20331	0.12769	Psma4/Psma5
GO:0030128	clathrin coat of endocytic vesicle	2/1849	7/20331	0.12769	Epn2/Sgip1
GO:0030904	retromer complex	2/1849	7/20331	0.12769	Vps35/Dennd4c
GO:0030956	glutamyl-tRNA(Gln) amidotransferase complex	2/1849	7/20331	0.12769	Gatc/LOC115488500
GO:0034663	endoplasmic reticulum chaperone complex	2/1849	7/20331	0.12769	Hspa5/Dnajc10
GO:0044326	dendritic spine neck	2/1849	7/20331	0.12769	Ppp1r9a/Ppp1r9b
GO:0061617	MICOS complex	2/1849	7/20331	0.12769	Chchd10/Immt
GO:0072357	PTW/PP1 phosphatase complex	2/1849	7/20331	0.12769	Ppp1cb/Tox4
GO:0000940	condensed chromosome outer kinetochore	3/1849	14/20331	0.128423	Cenpf/Spdl1/2700099C18Rik
GO:0005798	Golgi-associated vesicle	12/1849	92/20331	0.129286	Tgoln1/Tmed3/Copb2/Lyz1/Vma21/Yipf6/Sec24b/Aftph/Tmem199/Adam10/Sort1/Tmed10-ps
GO:0005834	heterotrimeric G-protein complex	4/1849	22/20331	0.133971	Gnb5/Gng4/Gnao1/Gng11
GO:1905360	GTPase complex	4/1849	22/20331	0.133971	Gnb5/Gng4/Gnao1/Gng11
GO:0070382	exocytic vesicle	17/1849	140/20331	0.134479	Stx6/Syngr1/Cops5/Prkn/Syp/Sptbn2/Phaf1/Mtmr2/Wfs1/Rab5a/Entpd1/Adam10/Septin4/Vamp2/Sv2a/Sh3gl2/Unc13b
GO:0000123	histone acetyltransferase complex	10/1849	75/20331	0.141245	Taf5l/Pole4/Morf4l1-ps1/Map3k7/Phf20l1/Ep300/Zzz3/Atxn7l3/Kat14/Supt20
GO:0045171	intercellular bridge	7/1849	48/20331	0.142087	Prc1/Wapl/Iqcb1/Cep55/Ninl/Olfm4/Kif20a
GO:0034451	centriolar satellite	9/1849	66/20331	0.142611	Dysf/Cd2ap/Pcm1/Pik3r5/Ythdf2/Cep55/Odf2l/Zmynd10/Cep290
GO:0030663	COPI-coated vesicle membrane	3/1849	15/20331	0.150223	Tmed3/Copb2/Tmem199
GO:0045334	clathrin-coated endocytic vesicle	3/1849	15/20331	0.150223	Epn2/Lmbrd1/Sgip1
GO:0098688	parallel fiber to Purkinje cell synapse	3/1849	15/20331	0.150223	P2rx6/Plcb4/Sptbn2
GO:0000502	proteasome complex	8/1849	58/20331	0.153576	Psma4/Psmd6/Uchl5/Psmd10/Psme4/Rad23a/Adrm1/Psma5
GO:0034705	potassium channel complex	8/1849	58/20331	0.153576	Kcnq1/Kcnb1/Slc5a3/Lrrc26/Kcng1/Kcnmb3/Kcne3/Kcnc3
GO:1905369	endopeptidase complex	8/1849	58/20331	0.153576	Psma4/Psmd6/Uchl5/Psmd10/Psme4/Rad23a/Adrm1/Psma5
GO:0031248	protein acetyltransferase complex	11/1849	86/20331	0.156284	Taf5l/Pole4/Morf4l1-ps1/Map3k7/Phf20l1/Naa25/Ep300/Zzz3/Atxn7l3/Kat14/Supt20
GO:0031902	late endosome membrane	11/1849	86/20331	0.156284	Lamtor5/Ifitm2/Ap5m1/Chmp1b/Uevld/Tmem106b/Tmem165/Abca3/Laptm4b/Pip4p2/Vps33a
GO:1902493	acetyltransferase complex	11/1849	86/20331	0.156284	Taf5l/Pole4/Morf4l1-ps1/Map3k7/Phf20l1/Naa25/Ep300/Zzz3/Atxn7l3/Kat14/Supt20
GO:0043209	myelin sheath	13/1849	105/20331	0.157009	Hspa5/Ppia/Eno1b/Pdia3/Uqcrc1/Gnb5/Car13/Gnao1/Atp5b/Immt/Pllp/Septin4/Cntn1
GO:0030669	clathrin-coated endocytic vesicle membrane	2/1849	8/20331	0.160364	Epn2/Sgip1
GO:0035859	Seh1-associated complex	2/1849	8/20331	0.160364	Sesn3/Mios
GO:0042555	MCM complex	2/1849	8/20331	0.160364	Mcm4/Mcm8
GO:0070938	contractile ring	2/1849	8/20331	0.160364	Prc1/Pdxp
GO:0072557	IPAF inflammasome complex	2/1849	8/20331	0.160364	Naip1/Casp1
GO:0030119	AP-type membrane coat adaptor complex	5/1849	32/20331	0.160962	Ap4s1/Ap5m1/Sgip1/Aftph/Ap1m2
GO:0001726	ruffle	15/1849	125/20331	0.163182	Cyfip1/Wipf1/Gm12854/Layn/Arf4/Cd2ap/Mtmr14/Podxl/Spry2/Plekha1/Pdxp/Tln2/Rab5a/Epha2/Ppp1r9b
GO:0005802	trans-Golgi network	17/1849	145/20331	0.167226	Ap4s1/Car4/Stx6/Tgoln1/Clvs1/Yipf6/Phaf1/Tmem165/Postn/Aftph/Adam10/Atp7b/Gper1/Fut7/Gm32391/Slc66a2/Atp2c2
GO:0030137	COPI-coated vesicle	4/1849	24/20331	0.169178	Tmed3/Copb2/Tmem199/Tmed10-ps
GO:0046930	pore complex	4/1849	24/20331	0.169178	Pdzd11/Vdac3/Adam10/C6
GO:0098978	glutamatergic synapse	28/1849	255/20331	0.171427	Wnt5a/Rims2/Grin2d/Arf4/Gucy1a1/Dgkq/P2rx6/Nrp2/Plcb4/Ppp1r9a/Sptbn2/Sipa1l1/Nos1/Begain/Lrfn4/Lrrc4b/Ophn1/Adam23/Nptn/Adam10/Rapgef4/Adcy1/Kcnc3/Fbxo45/Sv2a/Sh3gl2/Unc13b/Mecp2
GO:0036379	myofilament	3/1849	16/20331	0.17309	Tnnt3/Tnni2/Tnni1
GO:0097038	perinuclear endoplasmic reticulum	3/1849	16/20331	0.17309	Gdpd5/Adam10/Mogat2
GO:0000923	equatorial microtubule organizing center	1/1849	2/20331	0.173623	Tubgcp4
GO:0000939	condensed chromosome inner kinetochore	1/1849	2/20331	0.173623	Cenpa
GO:0005943	phosphatidylinositol 3-kinase complex, class IA	1/1849	2/20331	0.173623	Pik3cg
GO:0005960	glycine cleavage complex	1/1849	2/20331	0.173623	Gm9199
GO:0009923	fatty acid elongase complex	1/1849	2/20331	0.173623	Elovl6
GO:0010009	cytoplasmic side of endosome membrane	1/1849	2/20331	0.173623	Rab5a
GO:0019008	molybdopterin synthase complex	1/1849	2/20331	0.173623	Mocs2
GO:0030689	Noc complex	1/1849	2/20331	0.173623	Casp8
GO:0030690	Noc1p-Noc2p complex	1/1849	2/20331	0.173623	Casp8
GO:0030906	retromer, cargo-selective complex	1/1849	2/20331	0.173623	Vps35
GO:0031391	Elg1 RFC-like complex	1/1849	2/20331	0.173623	Atad5
GO:0031416	NatB complex	1/1849	2/20331	0.173623	Naa25
GO:0031465	Cul4B-RING E3 ubiquitin ligase complex	1/1849	2/20331	0.173623	Dtl
GO:0032299	ribonuclease H2 complex	1/1849	2/20331	0.173623	Rnaseh2c
GO:0033186	CAF-1 complex	1/1849	2/20331	0.173623	Chaf1b
GO:0034466	chromaffin granule lumen	1/1849	2/20331	0.173623	Penk
GO:0034657	GID complex	1/1849	2/20331	0.173623	Rmnd5a
GO:0034681	integrin alpha11-beta1 complex	1/1849	2/20331	0.173623	Itga11
GO:0035578	azurophil granule lumen	1/1849	2/20331	0.173623	Prtn3
GO:0043511	inhibin complex	1/1849	2/20331	0.173623	Inhba
GO:0043512	inhibin A complex	1/1849	2/20331	0.173623	Inhba
GO:0043529	GET complex	1/1849	2/20331	0.173623	Caml
GO:0044611	nuclear pore inner ring	1/1849	2/20331	0.173623	Nup205
GO:0055087	Ski complex	1/1849	2/20331	0.173623	Skic3
GO:0060199	clathrin-sculpted glutamate transport vesicle	1/1849	2/20331	0.173623	Syp
GO:0060203	clathrin-sculpted glutamate transport vesicle membrane	1/1849	2/20331	0.173623	Syp
GO:0070369	beta-catenin-TCF7L2 complex	1/1849	2/20331	0.173623	Ctnnb1
GO:0070695	FHF complex	1/1849	2/20331	0.173623	Hook1
GO:0070765	gamma-secretase complex	1/1849	2/20331	0.173623	Tmed10-ps
GO:0070821	tertiary granule membrane	1/1849	2/20331	0.173623	Cd177
GO:0071541	eukaryotic translation initiation factor 3 complex, eIF3m	1/1849	2/20331	0.173623	Eif3f
GO:0071595	Nem1-Spo7 phosphatase complex	1/1849	2/20331	0.173623	Cnep1r1
GO:0071664	catenin-TCF7L2 complex	1/1849	2/20331	0.173623	Ctnnb1
GO:0090724	central region of growth cone	1/1849	2/20331	0.173623	Cyfip1
GO:0090725	peripheral region of growth cone	1/1849	2/20331	0.173623	Cyfip1
GO:0097057	TRAF2-GSTP1 complex	1/1849	2/20331	0.173623	Gstp-ps
GO:0097233	alveolar lamellar body membrane	1/1849	2/20331	0.173623	Abca3
GO:0097541	axonemal basal plate	1/1849	2/20331	0.173623	Wdpcp
GO:0098559	cytoplasmic side of early endosome membrane	1/1849	2/20331	0.173623	Rab5a
GO:0098842	postsynaptic early endosome	1/1849	2/20331	0.173623	Rab5a
GO:0099629	postsynaptic specialization of symmetric synapse	1/1849	2/20331	0.173623	Igsf9b
GO:1990072	TRAPPIII protein complex	1/1849	2/20331	0.173623	Trappc8
GO:1990357	terminal web	1/1849	2/20331	0.173623	Krt19
GO:1990406	CGRP receptor complex	1/1849	2/20331	0.173623	Calcrl
GO:1990851	Wnt-Frizzled-LRP5/6 complex	1/1849	2/20331	0.173623	Wnt9b
GO:0061695	transferase complex, transferring phosphorus-containing groups	18/1849	156/20331	0.175467	Ccnd1/Leo1/Taf5l/Pole4/Ccni/Gtf2a2/Pik3cg/Map3k7/Pik3r5/Ccne2/Sesn2/Phkb/Taf13/Pik3r6/Polr2d/Ikbkg/Polr3g/Tgfbr1
GO:0030139	endocytic vesicle	15/1849	127/20331	0.178296	Snx3/Stx6/Dysf/Cd2ap/Epn2/Rab9/Pld1/Lmbrd1/Sgip1/Rab5a/Pip4p2/Sh3kbp1/Ocln/Scara5/Unc13b
GO:0055037	recycling endosome	13/1849	108/20331	0.181631	Stx6/Ltf/2610528J11Rik/Tubgcp4/Slc30a10/Vps50/Sgk3/Rab5a/Slc31a2/Mcoln2/Gper1/Abhd17b/Zfyve27
GO:0000781	chromosome, telomeric region	9/1849	70/20331	0.183219	Ctc1/Zbtb48/Gm33950/Smc6/Terf1/Tnks/Dydc2/Pif1/Terf2ip
GO:0099512	supramolecular fiber	74/1849	733/20331	0.184556	Parva/Krt19/Snph/Wdr44/Pdzd11/Mtus2/Myh10/Katna1/Ctnnb1/Mmp2/Eppk1/Kptn/Wipf1/Prph/Aurka/Dynlt1c/Reep2/Tubgcp4/Dnal4/Dcn/Cd2ap/Kifap3/Ror2/Birc5/Rnf4/Shroom1/Haus2/Ltbp1/Nefm/Hrc/Ahnak/Mid1/Prc1/Nes/Spry2/Cep162/Kif2c/Cep295/Nbr1/Tubgcp2/Myl4/Pkp2/Pcp4/Nos1/Kifc2/Spast/Togaram1/Krt10/Iffo2/Cct4/Pde4dip/Gas8/Mapt/Fam161a/Gm46764/Ninl/Ehbp1/Col16a1/Mapre1/Dctn4/Gper1/Tnnt3/Hook1/Avil/Nefh/Togaram2/…
GO:0030684	preribosome	8/1849	61/20331	0.187217	Riok2/Imp4/Casp8/Utp4/Wdr36/Gm20156/Imp3/Ltv1
GO:0099060	integral component of postsynaptic specialization membrane	8/1849	61/20331	0.187217	Grin2d/P2rx6/Slc30a1/Lrfn4/Lrrc4b/1700034H15Rik/Nptn/Adcy1
GO:1904949	ATPase complex	8/1849	61/20331	0.187217	Smarca2/Csnk2a1-ps3/Rbbp7/Uchl5/Dpf1/Ss18l1/Atad5/Dpf3
GO:0031985	Golgi cisterna	10/1849	80/20331	0.188914	Smpd3/Galnt1/B4galt2/Tmed3/Lyz1/Yipf6/Nucb2/Fut7/Sort1/B4galt4
GO:0016328	lateral plasma membrane	7/1849	52/20331	0.190538	Kcnq1/Cldn3/Ctnnb1/Kcnb1/Gjb1/Ocln/Bves
GO:0035869	ciliary transition zone	7/1849	52/20331	0.190538	Kifap3/Pcm1/Iqcb1/Fam161a/Ttbk2/Macir/Cep290
GO:0043005	neuron projection	98/1849	988/20331	0.191881	Gdpd5/Snph/Gchfr/Kcnq1/Itga8/Katna1/Dab1/Lrp4/Cyfip1/Prph/Aurka/Dynlt1c/Rims2/Kcnb1/Igsf9b/Tac1/Aldh1a1/Arf4/Eno1b/Slc38a2/Cd2ap/Naip1/Ppp2ca/Kifap3/Ror2/Nmnat3/Mast1/Ltbp1/Casp8/Nefm/Pawr/P2rx6/Nrp2/Arhgap32/Bloc1s6/Plcb4/Zwint/Elk1/Prkn/Npy/Ppp1r9a/Syp/Gpr179/Iqcb1/Pcp4/Sipa1l1/Nos1/Amigo1/Ephb3/Begain/Phaf1/Spast/Aatk/Vstm5/Lrrc4b/Elovl5/Mtmr2/Mapt/Wfs1/Rab5a/Reg1/Epha2/Gnao1/Fam161a/Cdh13/Ent…
GO:0030426	growth cone	14/1849	119/20331	0.192423	Gdpd5/Katna1/Cyfip1/Dynlt1c/Eno1b/Ppp1r9a/Aatk/Mapt/Reg1/Rapgef4/Abitram/Ppp1r9b/Dpysl2/Zfyve27
GO:0009295	nucleoid	5/1849	34/20331	0.192494	Poldip2/Tefm/Hadhb/Atp5b/Tfb1m
GO:0042645	mitochondrial nucleoid	5/1849	34/20331	0.192494	Poldip2/Tefm/Hadhb/Atp5b/Tfb1m
GO:0016605	PML body	9/1849	71/20331	0.194103	Rnf4/Bmal1/Gm9836/Gm33950/Isg20/Patl1/Smc6/Thap1/Casp8ap2
GO:0000137	Golgi cis cisterna	2/1849	9/20331	0.194312	Smpd3/Lyz1
GO:0000801	central element	2/1849	9/20331	0.194312	Syce3/Syce2
GO:0005766	primary lysosome	2/1849	9/20331	0.194312	Nos1/Prtn3
GO:0005787	signal peptidase complex	2/1849	9/20331	0.194312	Spcs2-ps/Spcs3
GO:0030056	hemidesmosome	2/1849	9/20331	0.194312	Eppk1/Itgb4
GO:0030915	Smc5-Smc6 complex	2/1849	9/20331	0.194312	Gm33950/Smc6
GO:0032133	chromosome passenger complex	2/1849	9/20331	0.194312	Aurka/Birc5
GO:0042581	specific granule	2/1849	9/20331	0.194312	Ltf/Olfm4
GO:0042582	azurophil granule	2/1849	9/20331	0.194312	Nos1/Prtn3
GO:0043020	NADPH oxidase complex	2/1849	9/20331	0.194312	Noxo1/Noxa1
GO:0044327	dendritic spine head	2/1849	9/20331	0.194312	Gper1/Ppp1r9b
GO:0099144	anchored component of synaptic membrane	2/1849	9/20331	0.194312	Cntn1/Gphn
GO:0106068	SUMO ligase complex	2/1849	9/20331	0.194312	Gm33950/Smc6
GO:1990909	Wnt signalosome	2/1849	9/20331	0.194312	Ctnnb1/Adgra2
GO:0031970	organelle envelope lumen	12/1849	100/20331	0.196529	Coa6/Timm8b/Timm9/Chchd10/Pdia3/Ndufs5-ps/Nbr1/Zmiz1os1/Mix23/Immt/Bche/Star
GO:0034703	cation channel complex	18/1849	159/20331	0.196707	Kcnq1/Grin2d/Kcnb1/Slc5a3/Lrrc26/Kcng1/Catspere2/Pkd1l3/Scnn1a/Cacna1b/Kcnmb3/Shisa8/Kcne3/Cachd1/Kcnc3/Sacm1l/Scn8a/Cacna2d4
GO:0099081	supramolecular polymer	74/1849	737/20331	0.197752	Parva/Krt19/Snph/Wdr44/Pdzd11/Mtus2/Myh10/Katna1/Ctnnb1/Mmp2/Eppk1/Kptn/Wipf1/Prph/Aurka/Dynlt1c/Reep2/Tubgcp4/Dnal4/Dcn/Cd2ap/Kifap3/Ror2/Birc5/Rnf4/Shroom1/Haus2/Ltbp1/Nefm/Hrc/Ahnak/Mid1/Prc1/Nes/Spry2/Cep162/Kif2c/Cep295/Nbr1/Tubgcp2/Myl4/Pkp2/Pcp4/Nos1/Kifc2/Spast/Togaram1/Krt10/Iffo2/Cct4/Pde4dip/Gas8/Mapt/Fam161a/Gm46764/Ninl/Ehbp1/Col16a1/Mapre1/Dctn4/Gper1/Tnnt3/Hook1/Avil/Nefh/Togaram2/…
GO:0098982	GABA-ergic synapse	8/1849	62/20331	0.199076	Rims2/Igsf9b/Gucy1a1/Lrfn4/Cdh13/Nptn/Sv2a/Gphn
GO:0022627	cytosolic small ribosomal subunit	6/1849	44/20331	0.207187	Ddx3x/Rps24/Larp4/Gm5928/Gm9354/Gm15483
GO:0030134	COPII-coated ER to Golgi transport vesicle	5/1849	35/20331	0.209015	Tmed3/Vma21/Yipf6/Sec24b/Tmed10-ps
GO:0016234	inclusion body	7/1849	54/20331	0.216962	Edem1/Nxf1/Rnf32/Nefm/Prkn/Mapt/Card14
GO:0000159	protein phosphatase type 2A complex	3/1849	18/20331	0.221331	Ppp2ca/Ier5/Ppp2r2c
GO:0005942	phosphatidylinositol 3-kinase complex	3/1849	18/20331	0.221331	Pik3cg/Pik3r5/Pik3r6
GO:0032153	cell division site	6/1849	45/20331	0.222106	Myh10/Tubgcp4/Pdxp/Cep55/Septin4/Kif20a
GO:0098948	intrinsic component of postsynaptic specialization membrane	8/1849	64/20331	0.223661	Grin2d/P2rx6/Slc30a1/Lrfn4/Lrrc4b/1700034H15Rik/Nptn/Adcy1
GO:0098562	cytoplasmic side of membrane	13/1849	113/20331	0.226426	Snx18/Traf3/Gnb5/Gng4/Mapt/Rab5a/Gnao1/Gng11/Ppp1r9b/Alox15/Epm2aip1/Atp2c2/Gphn
GO:0005921	gap junction	4/1849	27/20331	0.227044	Gjb1/Gjc2/Gjb2/Gja4
GO:0014704	intercalated disc	4/1849	27/20331	0.227044	Ctnnb1/Rangrf/Pkp2/Dsp
GO:0000015	phosphopyruvate hydratase complex	2/1849	10/20331	0.229033	Eno1b/Eno4
GO:0000176	nuclear exosome (RNase complex)	2/1849	10/20331	0.229033	Exosc4/Mphosph6
GO:0000177	cytoplasmic exosome (RNase complex)	2/1849	10/20331	0.229033	Exosc4/Gtpbp1
GO:0000235	astral microtubule	2/1849	10/20331	0.229033	Fam161a/Mapre1
GO:0000930	gamma-tubulin complex	2/1849	10/20331	0.229033	Tubgcp4/Mzt1
GO:0005786	signal recognition particle, endoplasmic reticulum targeting	2/1849	10/20331	0.229033	Srp54c/Srp54a
GO:0008278	cohesin complex	2/1849	10/20331	0.229033	Rec8/Sgo2a
GO:0030126	COPI vesicle coat	2/1849	10/20331	0.229033	Tmed3/Copb2
GO:0030688	preribosome, small subunit precursor	2/1849	10/20331	0.229033	Riok2/Ltv1
GO:0031166	integral component of vacuolar membrane	2/1849	10/20331	0.229033	Entpd4/Entpd4b
GO:0031310	intrinsic component of vacuolar membrane	2/1849	10/20331	0.229033	Entpd4/Entpd4b
GO:0043034	costamere	2/1849	10/20331	0.229033	Krt19/Ahnak
GO:0048500	signal recognition particle	2/1849	10/20331	0.229033	Srp54c/Srp54a
GO:1990498	mitotic spindle microtubule	2/1849	10/20331	0.229033	Haus2/Cep295
GO:0031901	early endosome membrane	10/1849	85/20331	0.242702	Hps6/Clvs1/Mtmr2/Rab5a/Tmem165/Zfyve16/Gm32391/Mmgt2/Rnft1/Plekhf2
GO:0005758	mitochondrial intermembrane space	11/1849	95/20331	0.244281	Coa6/Timm8b/Timm9/Chchd10/Pdia3/Ndufs5-ps/Nbr1/Zmiz1os1/Mix23/Immt/Star
GO:0005790	smooth endoplasmic reticulum	3/1849	19/20331	0.246368	Hspa5/Pdia3/Plcb4
GO:0016342	catenin complex	3/1849	19/20331	0.246368	Ctnnb1/Cdh17/Cdh13
GO:0030125	clathrin vesicle coat	3/1849	19/20331	0.246368	Epn2/Sgip1/Aftph
GO:0070461	SAGA-type complex	3/1849	19/20331	0.246368	Taf5l/Atxn7l3/Supt20
GO:0000126	transcription factor TFIIIB complex	1/1849	3/20331	0.248785	Brf2
GO:0000214	tRNA-intron endonuclease complex	1/1849	3/20331	0.248785	Tsen2
GO:0000798	nuclear cohesin complex	1/1849	3/20331	0.248785	Rec8
GO:0005588	collagen type V trimer	1/1849	3/20331	0.248785	Col16a1
GO:0005610	laminin-5 complex	1/1849	3/20331	0.248785	Lamb3
GO:0005688	U6 snRNP	1/1849	3/20331	0.248785	Lsm8
GO:0005726	perichromatin fibrils	1/1849	3/20331	0.248785	Nufip1
GO:0005851	eukaryotic translation initiation factor 2B complex	1/1849	3/20331	0.248785	Eif2b3
GO:0005956	protein kinase CK2 complex	1/1849	3/20331	0.248785	Csnk2a1-ps3
GO:0005964	phosphorylase kinase complex	1/1849	3/20331	0.248785	Phkb
GO:0008091	spectrin	1/1849	3/20331	0.248785	Sptbn2
GO:0008622	epsilon DNA polymerase complex	1/1849	3/20331	0.248785	Pole4
GO:0030893	meiotic cohesin complex	1/1849	3/20331	0.248785	Rec8
GO:0031390	Ctf18 RFC-like complex	1/1849	3/20331	0.248785	Ddx11
GO:0031515	tRNA (m1A) methyltransferase complex	1/1849	3/20331	0.248785	Trmt6
GO:0032783	ELL-EAF complex	1/1849	3/20331	0.248785	Aff4
GO:0034455	t-UTP complex	1/1849	3/20331	0.248785	Utp4
GO:0034991	nuclear meiotic cohesin complex	1/1849	3/20331	0.248785	Rec8
GO:0042719	mitochondrial intermembrane space protein transporter complex	1/1849	3/20331	0.248785	Timm9
GO:0042825	TAP complex	1/1849	3/20331	0.248785	Pdia3
GO:0042827	platelet dense granule	1/1849	3/20331	0.248785	Hps4
GO:0044545	NSL complex	1/1849	3/20331	0.248785	Phf20l1
GO:0060198	clathrin-sculpted vesicle	1/1849	3/20331	0.248785	Syp
GO:0070847	core mediator complex	1/1849	3/20331	0.248785	Med18
GO:0071144	heteromeric SMAD protein complex	1/1849	3/20331	0.248785	Smad9
GO:0072379	ER membrane insertion complex	1/1849	3/20331	0.248785	Sgtb
GO:0097232	lamellar body membrane	1/1849	3/20331	0.248785	Abca3
GO:0097450	astrocyte end-foot	1/1849	3/20331	0.248785	Adgrg1
GO:0098591	external side of apical plasma membrane	1/1849	3/20331	0.248785	Abcg2
GO:0098690	glycinergic synapse	1/1849	3/20331	0.248785	Gphn
GO:0098826	endoplasmic reticulum tubular network membrane	1/1849	3/20331	0.248785	Atl3
GO:0101002	ficolin-1-rich granule	1/1849	3/20331	0.248785	Psma5
GO:0120200	rod photoreceptor outer segment	1/1849	3/20331	0.248785	Cep290
GO:1903143	adrenomedullin receptor complex	1/1849	3/20331	0.248785	Calcrl
GO:1904813	ficolin-1-rich granule lumen	1/1849	3/20331	0.248785	Psma5
GO:1990111	spermatoproteasome complex	1/1849	3/20331	0.248785	Psme4
GO:1990393	3M complex	1/1849	3/20331	0.248785	Cul7
GO:1990531	phospholipid-translocating ATPase complex	1/1849	3/20331	0.248785	Atp10a
GO:1990879	CST complex	1/1849	3/20331	0.248785	Ctc1
GO:0010494	cytoplasmic stress granule	6/1849	47/20331	0.252929	Ddx3x/Nxf1/Larp4/Ythdf2/Rnf135/Eif2s1
GO:0030427	site of polarized growth	14/1849	126/20331	0.254805	Gdpd5/Katna1/Cyfip1/Dynlt1c/Eno1b/Ppp1r9a/Aatk/Mapt/Reg1/Rapgef4/Abitram/Ppp1r9b/Dpysl2/Zfyve27
GO:0005639	integral component of nuclear inner membrane	2/1849	11/20331	0.264105	P2rx6/Tmem43
GO:0005744	TIM23 mitochondrial import inner membrane translocase complex	2/1849	11/20331	0.264105	Timm17b/Gm30251
GO:0005818	aster	2/1849	11/20331	0.264105	Fam161a/Mapre1
GO:0016581	NuRD complex	2/1849	11/20331	0.264105	Csnk2a1-ps3/Rbbp7
GO:0030008	TRAPP complex	2/1849	11/20331	0.264105	Trappc1/Trappc8
GO:0030673	axolemma	2/1849	11/20331	0.264105	Mapt/Kcnc3
GO:0031229	intrinsic component of nuclear inner membrane	2/1849	11/20331	0.264105	P2rx6/Tmem43
GO:0032433	filopodium tip	2/1849	11/20331	0.264105	Cyfip1/Abitram
GO:0044292	dendrite terminus	2/1849	11/20331	0.264105	Cyfip1/Gpr179
GO:0044322	endoplasmic reticulum quality control compartment	2/1849	11/20331	0.264105	Edem1/Edem2
GO:0045120	pronucleus	2/1849	11/20331	0.264105	Aurka/Cenpf
GO:0090545	CHD-type complex	2/1849	11/20331	0.264105	Csnk2a1-ps3/Rbbp7
GO:0099523	presynaptic cytosol	2/1849	11/20331	0.264105	Fbxo45/Sh3gl2
GO:0005811	lipid droplet	9/1849	77/20331	0.26454	Ces1e/Katna1/Atg2b/Lmln/Ldah/Rab18/Spast/Alox15/Pla2g4c
GO:0005795	Golgi stack	11/1849	97/20331	0.265964	Smpd3/Galnt1/Tmbim4/B4galt2/Tmed3/Lyz1/Yipf6/Nucb2/Fut7/Sort1/B4galt4
GO:0030665	clathrin-coated vesicle membrane	4/1849	29/20331	0.268022	Epn2/Syp/Sgip1/Aftph
GO:0032040	small-subunit processome	4/1849	29/20331	0.268022	Imp4/Utp4/Wdr36/Imp3
GO:0030660	Golgi-associated vesicle membrane	6/1849	48/20331	0.268763	Tmed3/Copb2/Vma21/Sec24b/Aftph/Tmem199
GO:0008328	ionotropic glutamate receptor complex	3/1849	20/20331	0.271809	Grin2d/Shisa8/Sacm1l
GO:0030131	clathrin adaptor complex	3/1849	20/20331	0.271809	Sgip1/Aftph/Ap1m2
GO:0031528	microvillus membrane	3/1849	20/20331	0.271809	Ctnnb1/Ceacam20/Prom1
GO:0031941	filamentous actin	3/1849	20/20331	0.271809	Kptn/Cd2ap/Ehbp1
GO:0035327	transcriptionally active chromatin	3/1849	20/20331	0.271809	Aff4/Skic3/Exosc4
GO:0098685	Schaffer collateral - CA1 synapse	7/1849	58/20331	0.273268	Ctnnb1/Slc30a1/Syp/1700034H15Rik/Nptn/Adcy1/Sh3gl2
GO:0098839	postsynaptic density membrane	7/1849	58/20331	0.273268	Grin2d/Slc30a1/Lrfn4/Lrrc4b/1700034H15Rik/Nptn/Adcy1
GO:0009898	cytoplasmic side of plasma membrane	11/1849	98/20331	0.277034	Snx18/Traf3/Gnb5/Gng4/Mapt/Gnao1/Gng11/Ppp1r9b/Alox15/Atp2c2/Gphn
GO:0031526	brush border membrane	6/1849	49/20331	0.284833	Slc28a2/Car4/Slc2a2/Slc26a6/Slc26a3/Slc5a8
GO:0046658	anchored component of plasma membrane	7/1849	59/20331	0.287916	Cd177/Car4/Gpihbp1/Rgmb/Cntn1/Gphn/Gp1ba
GO:0070603	SWI/SNF superfamily-type complex	7/1849	59/20331	0.287916	Smarca2/Csnk2a1-ps3/Rbbp7/Uchl5/Dpf1/Ss18l1/Dpf3
GO:0016235	aggresome	4/1849	30/20331	0.288986	Edem1/Rnf32/Prkn/Card14
GO:0031519	PcG protein complex	4/1849	30/20331	0.288986	Rbbp7/Cbx2/Yy2/Zfp143
GO:0008180	COP9 signalosome	3/1849	21/20331	0.297507	Hspa5/Cops5/Hspa1l
GO:0044295	axonal growth cone	3/1849	21/20331	0.297507	Cyfip1/Dynlt1c/Mapt
GO:0098799	outer mitochondrial membrane protein complex	3/1849	21/20331	0.297507	Tomm20/Samm50/Gm46350
GO:0000124	SAGA complex	2/1849	12/20331	0.299178	Atxn7l3/Supt20
GO:0031258	lamellipodium membrane	2/1849	12/20331	0.299178	Pdxp/Epha2
GO:0032039	integrator complex	2/1849	12/20331	0.299178	Ints9/Ints7
GO:0032585	multivesicular body membrane	2/1849	12/20331	0.299178	Abca3/Laptm4b
GO:0043083	synaptic cleft	2/1849	12/20331	0.299178	Lamb2/Gm35065
GO:0044233	mitochondria-associated endoplasmic reticulum membrane	2/1849	12/20331	0.299178	Clcc1/Tmem41b
GO:0000118	histone deacetylase complex	6/1849	50/20331	0.301103	Kdm3b/Morf4l1-ps1/Csnk2a1-ps3/Rbbp7/Hdac11/Trerf1
GO:0030666	endocytic vesicle membrane	6/1849	50/20331	0.301103	Epn2/Rab9/Sgip1/Rab5a/Pip4p2/Scara5
GO:0099634	postsynaptic specialization membrane	9/1849	80/20331	0.302379	Grin2d/P2rx6/Slc30a1/Lrfn4/Lrrc4b/1700034H15Rik/Nptn/Adcy1/Gphn
GO:0030141	secretory granule	31/1849	308/20331	0.302657	Nudt1/Rph3al/Kcnq1/Cd177/Car4/Ltf/Hps4/Pdia3/Pomt1/Lyz1/Klk1/Npy/Nos1/Fstl4/Gip/Scnn1a/Ptprn/Ebag9/Wfs1/Rab5a/Reg1/Penk/Abca3/Prtn3/Ica1/Tmed10-ps/Tbxa2r/Scg5/Olfm4/Dennd4c/Psma5
GO:0000792	heterochromatin	8/1849	70/20331	0.302999	Hmga1b/Cenpa/Zfp618/Morc2a/Cbx2/Foxc1/Dnmt3b/Mecp2
GO:0005911	cell-cell junction	37/1849	373/20331	0.313133	Poldip2/Cldn3/Ctnnb1/Eppk1/Wtip/Slc2a2/Rangrf/Cd2ap/Sh3bp1/Lama1/Gjb1/Shroom1/Ahnak/Pkp2/Tjp1/Pdxp/Sapcd2/Cldn2/Cd53/Arvcf/Vcl/Epha2/Gjc2/Gjb2/Cdc42bpa/Adam10/Atp7b/Sh3kbp1/Gja4/Prkch/Sv2a/Ppp1r9b/Ocln/Nectin2/Tgfbr1/Bves/Dsp
GO:0000790	nuclear chromatin	9/1849	81/20331	0.315274	Morf4l1-ps1/Smarca2/Nufip1/Csnk2a1-ps3/Rbbp7/Uchl5/Dpf1/Ss18l1/Dpf3
GO:0000444	MIS12/MIND type complex	1/1849	4/20331	0.317114	Nsl1
GO:0000445	THO complex part of transcription export complex	1/1849	4/20331	0.317114	Thoc2l
GO:0005664	nuclear origin of replication recognition complex	1/1849	4/20331	0.317114	Orc3
GO:0014731	spectrin-associated cytoskeleton	1/1849	4/20331	0.317114	Sptbn2
GO:0019185	snRNA-activating protein complex	1/1849	4/20331	0.317114	Snapc4
GO:0030124	AP-4 adaptor complex	1/1849	4/20331	0.317114	Ap4s1
GO:0030981	cortical microtubule cytoskeleton	1/1849	4/20331	0.317114	Mapre1
GO:0031597	cytosolic proteasome complex	1/1849	4/20331	0.317114	Uchl5
GO:0033263	CORVET complex	1/1849	4/20331	0.317114	Vps8
GO:0034751	aryl hydrocarbon receptor complex	1/1849	4/20331	0.317114	Bmal1
GO:0035985	senescence-associated heterochromatin focus	1/1849	4/20331	0.317114	Hmga1b
GO:0043527	tRNA methyltransferase complex	1/1849	4/20331	0.317114	Trmt6
GO:0044316	cone cell pedicle	1/1849	4/20331	0.317114	Rapgef4
GO:0046691	intracellular canaliculus	1/1849	4/20331	0.317114	Aqp8
GO:0048179	activin receptor complex	1/1849	4/20331	0.317114	Tgfbr1
GO:0070820	tertiary granule	1/1849	4/20331	0.317114	Cd177
GO:0071141	SMAD protein complex	1/1849	4/20331	0.317114	Smad9
GO:0071819	DUBm complex	1/1849	4/20331	0.317114	Atxn7l3
GO:0072558	NLRP1 inflammasome complex	1/1849	4/20331	0.317114	Casp1
GO:0097179	protease inhibitor complex	1/1849	4/20331	0.317114	Casp1
GO:0097356	perinucleolar compartment	1/1849	4/20331	0.317114	Eppk1
GO:0097487	multivesicular body, internal vesicle	1/1849	4/20331	0.317114	Laptm4b
GO:1904090	peptidase inhibitor complex	1/1849	4/20331	0.317114	Casp1
GO:1905721	mitotic spindle astral microtubule end	1/1849	4/20331	0.317114	Mapre1
GO:1990075	periciliary membrane compartment	1/1849	4/20331	0.317114	Kifap3
GO:0045211	postsynaptic membrane	22/1849	216/20331	0.32028	Ctnnb1/Grin2d/Kcnb1/Igsf9b/P2rx6/Nrp2/Slc30a1/Lrfn4/Lrrc4b/Grin1/1700034H15Rik/Faim2/Shisa8/Nptn/Adam10/Atp6ap2/Gper1/Adcy1/Kcnc3/Cntn1/Chrm1/Gphn
GO:0005581	collagen trimer	8/1849	72/20331	0.330774	Col18a1/Dcn/Col6a2/Col15a1/Col8a1/C1qtnf6/Col16a1/Col8a2
GO:0031234	extrinsic component of cytoplasmic side of plasma membrane	7/1849	62/20331	0.332816	Snx18/Gnb5/Gng4/Gnao1/Gng11/Alox15/Gphn
GO:0044309	neuron spine	14/1849	134/20331	0.333639	Cyfip1/Arf4/P2rx6/Arhgap32/Ppp1r9a/Syp/Sipa1l1/Nos1/Mtmr2/Ophn1/Adam10/Gper1/Rapgef4/Ppp1r9b
GO:0005852	eukaryotic translation initiation factor 3 complex	2/1849	13/20331	0.333961	Ddx3x/Eif3f
GO:0016580	Sin3 complex	2/1849	13/20331	0.333961	Morf4l1-ps1/Csnk2a1-ps3
GO:0048188	Set1C/COMPASS complex	2/1849	13/20331	0.333961	Dydc2/Wdr5b
GO:0098936	intrinsic component of postsynaptic membrane	11/1849	104/20331	0.345956	Grin2d/P2rx6/Nrp2/Slc30a1/Lrfn4/Lrrc4b/1700034H15Rik/Nptn/Adcy1/Kcnc3/Cntn1
GO:0098802	plasma membrane signaling receptor complex	13/1849	125/20331	0.348357	Itga8/Grin2d/Itga1/Traf3/Itgal/Itgax/Itgb4/Itga11/Shisa8/Calcrl/Sacm1l/Itgam/Tgfbr1
GO:0000307	cyclin-dependent protein kinase holoenzyme complex	3/1849	23/20331	0.34915	Ccnd1/Ccni/Ccne2
GO:0071011	precatalytic spliceosome	3/1849	23/20331	0.34915	Cwc22/Prpf38a/Dhx16
GO:0099023	vesicle tethering complex	6/1849	53/20331	0.350764	Vps8/Cog1/Trappc1/Hook1/Trappc8/Synpo2
GO:0030118	clathrin coat	4/1849	33/20331	0.352859	Epn2/Sgip1/Aftph/Ap1m2
GO:0032391	photoreceptor connecting cilium	4/1849	33/20331	0.352859	Kifap3/Iqcb1/Fam161a/Cep290
GO:0030175	filopodium	7/1849	64/20331	0.363286	Cyfip1/Podxl/Adgra2/Ppp1r9a/Abi1/Abitram/Ppp1r9b
GO:0016528	sarcoplasm	6/1849	54/20331	0.36749	Car4/Pomt1/Hrc/Nos1/H6pd/E2f5
GO:0016471	vacuolar proton-transporting V-type ATPase complex	2/1849	14/20331	0.368217	Tmem199/Atp6ap2
GO:0032281	AMPA glutamate receptor complex	2/1849	14/20331	0.368217	Shisa8/Sacm1l
GO:0044305	calyx of Held	2/1849	14/20331	0.368217	Nos1/Unc13b
GO:0016529	sarcoplasmic reticulum	5/1849	44/20331	0.371318	Car4/Pomt1/Hrc/Nos1/H6pd
GO:0044291	cell-cell contact zone	5/1849	44/20331	0.371318	Ctnnb1/Rangrf/Ahnak/Pkp2/Dsp
GO:0001772	immunological synapse	3/1849	24/20331	0.37486	Cd53/Nptn/Fyb2
GO:0099091	postsynaptic specialization, intracellular component	3/1849	24/20331	0.37486	Ctnnb1/Nos1/Gphn
GO:0000808	origin recognition complex	1/1849	5/20331	0.379231	Orc3
GO:0000835	ER ubiquitin ligase complex	1/1849	5/20331	0.379231	Fam8a1
GO:0000836	Hrd1p ubiquitin ligase complex	1/1849	5/20331	0.379231	Fam8a1
GO:0000839	Hrd1p ubiquitin ligase ERAD-L complex	1/1849	5/20331	0.379231	Fam8a1
GO:0000931	gamma-tubulin large complex	1/1849	5/20331	0.379231	Mzt1
GO:0001401	SAM complex	1/1849	5/20331	0.379231	Samm50
GO:0005641	nuclear envelope lumen	1/1849	5/20331	0.379231	Bche
GO:0009331	glycerol-3-phosphate dehydrogenase complex	1/1849	5/20331	0.379231	Gpd1
GO:0016460	myosin II complex	1/1849	5/20331	0.379231	Myh10
GO:0017101	aminoacyl-tRNA synthetase multienzyme complex	1/1849	5/20331	0.379231	Aimp2
GO:0017146	NMDA selective glutamate receptor complex	1/1849	5/20331	0.379231	Grin2d
GO:0030121	AP-1 adaptor complex	1/1849	5/20331	0.379231	Aftph
GO:0031265	CD95 death-inducing signaling complex	1/1849	5/20331	0.379231	Casp8
GO:0031501	mannosyltransferase complex	1/1849	5/20331	0.379231	Pigv
GO:0032280	symmetric synapse	1/1849	5/20331	0.379231	Igsf9b
GO:0032541	cortical endoplasmic reticulum	1/1849	5/20331	0.379231	Stimate
GO:0032584	growth cone membrane	1/1849	5/20331	0.379231	Zfyve27
GO:0032593	insulin-responsive compartment	1/1849	5/20331	0.379231	Dennd4c
GO:0036396	RNA N6-methyladenosine methyltransferase complex	1/1849	5/20331	0.379231	Wtap
GO:0038037	G protein-coupled receptor dimeric complex	1/1849	5/20331	0.379231	Calcrl
GO:0042406	extrinsic component of endoplasmic reticulum membrane	1/1849	5/20331	0.379231	Zc3h12a
GO:0043203	axon hillock	1/1849	5/20331	0.379231	Aurka
GO:0044294	dendritic growth cone	1/1849	5/20331	0.379231	Cyfip1
GO:0044300	cerebellar mossy fiber	1/1849	5/20331	0.379231	Lrrc4b
GO:0045254	pyruvate dehydrogenase complex	1/1849	5/20331	0.379231	Pdhx
GO:0048237	rough endoplasmic reticulum lumen	1/1849	5/20331	0.379231	Lyz1
GO:0048788	cytoskeleton of presynaptic active zone	1/1849	5/20331	0.379231	Rims2
GO:0070761	pre-snoRNP complex	1/1849	5/20331	0.379231	Nufip1
GO:0071006	U2-type catalytic step 1 spliceosome	1/1849	5/20331	0.379231	Cwc22
GO:0071012	catalytic step 1 spliceosome	1/1849	5/20331	0.379231	Cwc22
GO:0072669	tRNA-splicing ligase complex	1/1849	5/20331	0.379231	Fam98b
GO:0097169	AIM2 inflammasome complex	1/1849	5/20331	0.379231	Casp1
GO:0097197	tetraspanin-enriched microdomain	1/1849	5/20331	0.379231	Adam10
GO:0097227	sperm annulus	1/1849	5/20331	0.379231	Septin4
GO:0097441	basal dendrite	1/1849	5/20331	0.379231	Sh3gl2
GO:0098536	deuterosome	1/1849	5/20331	0.379231	Cep152
GO:0099025	anchored component of postsynaptic membrane	1/1849	5/20331	0.379231	Cntn1
GO:0099078	BORC complex	1/1849	5/20331	0.379231	Borcs6
GO:0120206	photoreceptor distal connecting cilium	1/1849	5/20331	0.379231	Cep290
GO:1903439	calcitonin family receptor complex	1/1849	5/20331	0.379231	Calcrl
GO:1990316	Atg1/ULK1 kinase complex	1/1849	5/20331	0.379231	Sesn2
GO:0042734	presynaptic membrane	11/1849	107/20331	0.381501	Snph/Ctnnb1/Rims2/Syp/Lrrc4b/Adam23/Nptn/Gper1/Kcnc3/Cntn1/Unc13b
GO:0032580	Golgi cisterna membrane	6/1849	55/20331	0.384246	Galnt1/B4galt2/Tmed3/Fut7/Sort1/B4galt4
GO:0032432	actin filament bundle	5/1849	45/20331	0.389969	Marcks/Myh10/Limch1/Dctn4/Synpo2
GO:0042641	actomyosin	5/1849	45/20331	0.389969	Myh10/Limch1/Cdc42bpa/Dctn4/Synpo2
GO:0043197	dendritic spine	13/1849	129/20331	0.391684	Cyfip1/Arf4/P2rx6/Arhgap32/Ppp1r9a/Sipa1l1/Nos1/Mtmr2/Ophn1/Adam10/Gper1/Rapgef4/Ppp1r9b
GO:0005801	cis-Golgi network	4/1849	35/20331	0.39556	Angel1/Phtf1/Yipf6/Tmed10-ps
GO:0031225	anchored component of membrane	15/1849	151/20331	0.399644	Lypd8/Cd177/Car4/Gpihbp1/Vnn1/Ly6m/Rgmb/Nt5e/Rab5a/Cdh13/Cd55/Cntn1/Gphn/Gp1ba/Efna3
GO:0000314	organellar small ribosomal subunit	3/1849	25/20331	0.400358	Mrps34/Mrps31/Mrps2
GO:0005763	mitochondrial small ribosomal subunit	3/1849	25/20331	0.400358	Mrps34/Mrps31/Mrps2
GO:1990752	microtubule end	3/1849	25/20331	0.400358	Rnf4/Spry2/Mapre1
GO:0000242	pericentriolar material	2/1849	15/20331	0.401755	Pcm1/Cep152
GO:0031616	spindle pole centrosome	2/1849	15/20331	0.401755	Aurka/Bnip2
GO:0099513	polymeric cytoskeletal fiber	55/1849	582/20331	0.402296	Krt19/Snph/Wdr44/Pdzd11/Mtus2/Katna1/Eppk1/Kptn/Wipf1/Prph/Aurka/Dynlt1c/Reep2/Tubgcp4/Dnal4/Cd2ap/Kifap3/Ror2/Birc5/Rnf4/Shroom1/Haus2/Nefm/Mid1/Prc1/Nes/Spry2/Cep162/Kif2c/Cep295/Tubgcp2/Pkp2/Pcp4/Kifc2/Spast/Togaram1/Krt10/Iffo2/Cct4/Gas8/Mapt/Fam161a/Gm46764/Ninl/Ehbp1/Mapre1/Gper1/Hook1/Avil/Nefh/Togaram2/Mns1/Tbca/Rmdn1/Kif20a
GO:0005776	autophagosome	7/1849	67/20331	0.409293	Entpd4/Entpd4b/Nbr1/Peg3/Ubqln2/Atp6ap2/Fyco1
GO:0099055	integral component of postsynaptic membrane	10/1849	99/20331	0.412952	Grin2d/P2rx6/Nrp2/Slc30a1/Lrfn4/Lrrc4b/1700034H15Rik/Nptn/Adcy1/Kcnc3
GO:0030667	secretory granule membrane	8/1849	78/20331	0.415815	Rph3al/Kcnq1/Cd177/Car4/Rab5a/Abca3/Ica1/Tmed10-ps
GO:0032154	cleavage furrow	4/1849	36/20331	0.416758	Myh10/Pdxp/Cep55/Kif20a
GO:0043235	receptor complex	26/1849	271/20331	0.417274	Itga8/Grin2d/Ror2/Itga1/Bmal1/Gpr20/Traf3/Tyro3/P2rx6/Itgal/Adrb3/Itgax/Nbr1/Prlr/Itgb4/Pkd1l3/Ephb3/Il3ra/Epha2/Itga11/Shisa8/Tgfbr2/Calcrl/Sacm1l/Itgam/Tgfbr1
GO:1990351	transporter complex	23/1849	239/20331	0.419908	Kcnq1/Grin2d/Kcnb1/Timm9/Slc26a6/Slc5a3/Lrrc26/Kcng1/Catspere2/Pkd1l3/Scnn1a/Atp10a/Cacna1b/Kcnmb3/Shisa8/Kcne3/Cachd1/Gm31598/Kcnc3/Lrrc8d/Sacm1l/Scn8a/Cacna2d4
GO:0030016	myofibril	15/1849	153/20331	0.419911	Parva/Krt19/Ctnnb1/Mmp2/Hrc/Ahnak/Nbr1/Myl4/Nos1/Pde4dip/Dctn4/Tnnt3/Tnni2/Synpo2/Tnni1
GO:0019897	extrinsic component of plasma membrane	11/1849	111/20331	0.429316	Ctnnb1/Snx18/Cdh17/Eno1b/Gnb5/Gng4/Gnao1/Cdh13/Gng11/Alox15/Gphn
GO:0034702	ion channel complex	21/1849	219/20331	0.433011	Kcnq1/Grin2d/Kcnb1/Slc26a6/Slc5a3/Lrrc26/Kcng1/Catspere2/Pkd1l3/Scnn1a/Cacna1b/Kcnmb3/Shisa8/Kcne3/Cachd1/Gm31598/Kcnc3/Lrrc8d/Sacm1l/Scn8a/Cacna2d4
GO:0032587	ruffle membrane	6/1849	58/20331	0.434399	Arf4/Spry2/Plekha1/Pdxp/Epha2/Ppp1r9b
GO:0005742	mitochondrial outer membrane translocase complex	2/1849	16/20331	0.434421	Tomm20/Gm46350
GO:0032839	dendrite cytoplasm	2/1849	16/20331	0.434421	Ada/Zc3h14
GO:0070822	Sin3-type complex	2/1849	16/20331	0.434421	Morf4l1-ps1/Csnk2a1-ps3
GO:0005583	fibrillar collagen trimer	1/1849	6/20331	0.435701	Col16a1
GO:0016281	eukaryotic translation initiation factor 4F complex	1/1849	6/20331	0.435701	Gm12444
GO:0030122	AP-2 adaptor complex	1/1849	6/20331	0.435701	Sgip1
GO:0030897	HOPS complex	1/1849	6/20331	0.435701	Hook1
GO:0030914	STAGA complex	1/1849	6/20331	0.435701	Taf5l
GO:0031932	TORC2 complex	1/1849	6/20331	0.435701	Prr5l
GO:0033061	DNA recombinase mediator complex	1/1849	6/20331	0.435701	Xrcc3
GO:0045098	type III intermediate filament	1/1849	6/20331	0.435701	Prph
GO:0045293	mRNA editing complex	1/1849	6/20331	0.435701	Wtap
GO:0071203	WASH complex	1/1849	6/20331	0.435701	Washc3
GO:0071986	Ragulator complex	1/1849	6/20331	0.435701	Lamtor5
GO:0072559	NLRP3 inflammasome complex	1/1849	6/20331	0.435701	Casp1
GO:0097342	ripoptosome	1/1849	6/20331	0.435701	Casp8
GO:0098643	banded collagen fibril	1/1849	6/20331	0.435701	Col16a1
GO:0098993	anchored component of synaptic vesicle membrane	1/1849	6/20331	0.435701	Rab5a
GO:0099026	anchored component of presynaptic membrane	1/1849	6/20331	0.435701	Cntn1
GO:1990745	EARP complex	1/1849	6/20331	0.435701	Vps50
GO:1990907	beta-catenin-TCF complex	1/1849	6/20331	0.435701	Ctnnb1
GO:0043292	contractile fiber	15/1849	157/20331	0.460476	Parva/Krt19/Ctnnb1/Mmp2/Hrc/Ahnak/Nbr1/Myl4/Nos1/Pde4dip/Dctn4/Tnnt3/Tnni2/Synpo2/Tnni1
GO:0031362	anchored component of external side of plasma membrane	2/1849	17/20331	0.466097	Car4/Gp1ba
GO:0043073	germ cell nucleus	3/1849	28/20331	0.47473	Marcks/Aurka/Rec8
GO:0098878	neurotransmitter receptor complex	3/1849	28/20331	0.47473	Grin2d/Shisa8/Sacm1l
GO:0098862	cluster of actin-based cell projections	11/1849	115/20331	0.476964	Sis/Dab1/Slc28a2/Car4/Slc2a2/Slc38a2/Slc26a6/Slc26a3/Soat2/Slc5a8/Rapgef4
GO:0030017	sarcomere	13/1849	137/20331	0.479038	Parva/Krt19/Ctnnb1/Mmp2/Hrc/Nbr1/Myl4/Nos1/Dctn4/Tnnt3/Tnni2/Synpo2/Tnni1
GO:0005891	voltage-gated calcium channel complex	4/1849	39/20331	0.479108	Catspere2/Cacna1b/Cachd1/Cacna2d4
GO:0005902	microvillus	7/1849	72/20331	0.485242	Ctnnb1/Wwox/Cd44/Podxl/Lyz1/Ceacam20/Prom1
GO:0000138	Golgi trans cisterna	1/1849	7/20331	0.487036	Yipf6
GO:0000506	glycosylphosphatidylinositol-N-acetylglucosaminyltransferase (GPI-GnT) complex	1/1849	7/20331	0.487036	Pyurf
GO:0005672	transcription factor TFIIA complex	1/1849	7/20331	0.487036	Gtf2a2
GO:0005832	chaperonin-containing T-complex	1/1849	7/20331	0.487036	Cct4
GO:0005940	septin ring	1/1849	7/20331	0.487036	Septin4
GO:0008290	F-actin capping protein complex	1/1849	7/20331	0.487036	Capza2
GO:0016593	Cdc73/Paf1 complex	1/1849	7/20331	0.487036	Leo1
GO:0016600	flotillin complex	1/1849	7/20331	0.487036	Ctnnb1
GO:0031105	septin complex	1/1849	7/20331	0.487036	Septin4
GO:0031143	pseudopodium	1/1849	7/20331	0.487036	F2rl1
GO:0031264	death-inducing signaling complex	1/1849	7/20331	0.487036	Casp8
GO:0032156	septin cytoskeleton	1/1849	7/20331	0.487036	Septin4
GO:0033276	transcription factor TFTC complex	1/1849	7/20331	0.487036	Taf5l
GO:0097648	G protein-coupled receptor complex	1/1849	7/20331	0.487036	Calcrl
GO:0099569	presynaptic cytoskeleton	1/1849	7/20331	0.487036	Rims2
GO:1990124	messenger ribonucleoprotein complex	1/1849	7/20331	0.487036	Hnrnpa3
GO:0099240	intrinsic component of synaptic membrane	13/1849	138/20331	0.489861	Grin2d/P2rx6/Nrp2/Slc30a1/Lrfn4/Lrrc4b/1700034H15Rik/Adam23/Nptn/Adcy1/Kcnc3/Cntn1/Gphn
GO:0001533	cornified envelope	2/1849	18/20331	0.496693	Krt10/Dsp
GO:0031233	intrinsic component of external side of plasma membrane	2/1849	18/20331	0.496693	Car4/Gp1ba
GO:0033178	proton-transporting two-sector ATPase complex, catalytic domain	2/1849	18/20331	0.496693	Atp5d/Atp5b
GO:0061702	inflammasome complex	2/1849	18/20331	0.496693	Naip1/Casp1
GO:0001725	stress fiber	4/1849	40/20331	0.499324	Myh10/Limch1/Dctn4/Synpo2
GO:0097517	contractile actin filament bundle	4/1849	40/20331	0.499324	Myh10/Limch1/Dctn4/Synpo2
GO:0036126	sperm flagellum	9/1849	95/20331	0.500365	Slc26a6/Catspere2/Cfap251/Scnn1a/Slc26a3/Gas8/Spata6l/Septin4/Mns1
GO:0070160	tight junction	12/1849	128/20331	0.500582	Cldn3/Ctnnb1/Eppk1/Sh3bp1/Tjp1/Sapcd2/Cldn2/Epha2/Atp7b/Ocln/Tgfbr1/Bves
GO:0019898	extrinsic component of membrane	18/1849	195/20331	0.509945	Atg2b/Ctnnb1/Zc3h12a/Snx18/Coq6/Cdh17/Eno1b/Pik3cg/Bloc1s6/Gnb5/Gng4/Pik3r5/Gnao1/Cdh13/Gng11/Pik3r6/Alox15/Gphn
GO:0099568	cytoplasmic region	17/1849	184/20331	0.510174	Ctnnb1/Rims2/Eno1b/Cenpf/Kifap3/Bloc1s6/Cep162/Sapcd2/Spast/Gas8/Mapt/Wdpcp/Dnaaf1/Ada/Zc3h14/Mns1/Unc13b
GO:0015030	Cajal body	4/1849	41/20331	0.519193	Frg1/Uspl1/Isg20/Toe1
GO:1904115	axon cytoplasm	3/1849	30/20331	0.521869	Bloc1s6/Spast/Zc3h14
GO:0000803	sex chromosome	2/1849	19/20331	0.526143	Gm33950/Smc6
GO:0005797	Golgi medial cisterna	2/1849	19/20331	0.526143	Yipf6/Nucb2
GO:0030687	preribosome, large subunit precursor	2/1849	19/20331	0.526143	Casp8/Gm20156
GO:0031306	intrinsic component of mitochondrial outer membrane	2/1849	19/20331	0.526143	Cpt1a/Rhot1
GO:0031307	integral component of mitochondrial outer membrane	2/1849	19/20331	0.526143	Cpt1a/Rhot1
GO:0034706	sodium channel complex	2/1849	19/20331	0.526143	Scnn1a/Scn8a
GO:0099092	postsynaptic density, intracellular component	2/1849	19/20331	0.526143	Ctnnb1/Nos1
GO:0005579	membrane attack complex	1/1849	8/20331	0.533704	C6
GO:0005652	nuclear lamina	1/1849	8/20331	0.533704	Hlcs
GO:0005665	RNA polymerase II, core complex	1/1849	8/20331	0.533704	Polr2d
GO:0005879	axonemal microtubule	1/1849	8/20331	0.533704	Cep162
GO:0010369	chromocenter	1/1849	8/20331	0.533704	Scmh1
GO:0030061	mitochondrial crista	1/1849	8/20331	0.533704	Star
GO:0030130	clathrin coat of trans-Golgi network vesicle	1/1849	8/20331	0.533704	Aftph
GO:0031080	nuclear pore outer ring	1/1849	8/20331	0.533704	Nup160
GO:0031209	SCAR complex	1/1849	8/20331	0.533704	Cyfip1
GO:0033290	eukaryotic 48S preinitiation complex	1/1849	8/20331	0.533704	Eif3f
GO:0033391	chromatoid body	1/1849	8/20331	0.533704	Bmal1
GO:0035631	CD40 receptor complex	1/1849	8/20331	0.533704	Traf3
GO:0042405	nuclear inclusion body	1/1849	8/20331	0.533704	Nxf1
GO:0061673	mitotic spindle astral microtubule	1/1849	8/20331	0.533704	Mapre1
GO:0070652	HAUS complex	1/1849	8/20331	0.533704	Haus2
GO:0090576	RNA polymerase III transcription factor complex	1/1849	8/20331	0.533704	Brf2
GO:0097208	alveolar lamellar body	1/1849	8/20331	0.533704	Abca3
GO:0097449	astrocyte projection	1/1849	8/20331	0.533704	Adgrg1
GO:0097539	ciliary transition fiber	1/1849	8/20331	0.533704	Cenpf
GO:0098554	cytoplasmic side of endoplasmic reticulum membrane	1/1849	8/20331	0.533704	Epm2aip1
GO:0098845	postsynaptic endosome	1/1849	8/20331	0.533704	Rab5a
GO:1902495	transmembrane transporter complex	21/1849	231/20331	0.534417	Kcnq1/Grin2d/Kcnb1/Slc26a6/Slc5a3/Lrrc26/Kcng1/Catspere2/Pkd1l3/Scnn1a/Cacna1b/Kcnmb3/Shisa8/Kcne3/Cachd1/Gm31598/Kcnc3/Lrrc8d/Sacm1l/Scn8a/Cacna2d4
GO:0000421	autophagosome membrane	3/1849	31/20331	0.544551	Entpd4/Entpd4b/Atp6ap2
GO:0000791	euchromatin	3/1849	31/20331	0.544551	Ctnnb1/Cbx2/Setd5
GO:0005839	proteasome core complex	2/1849	20/20331	0.554403	Psma4/Psma5
GO:0012507	ER to Golgi transport vesicle membrane	2/1849	20/20331	0.554403	Vma21/Sec24b
GO:0033017	sarcoplasmic reticulum membrane	2/1849	20/20331	0.554403	Hrc/Nos1
GO:0071005	U2-type precatalytic spliceosome	2/1849	20/20331	0.554403	Cwc22/Dhx16
GO:0097228	sperm principal piece	2/1849	20/20331	0.554403	Catspere2/Scnn1a
GO:0005657	replication fork	4/1849	43/20331	0.557759	Bcl6/Hmces/Xrcc3/Pif1
GO:0005923	bicellular tight junction	11/1849	122/20331	0.558034	Cldn3/Ctnnb1/Eppk1/Sh3bp1/Tjp1/Sapcd2/Cldn2/Atp7b/Ocln/Tgfbr1/Bves
GO:0012510	trans-Golgi network transport vesicle membrane	1/1849	9/20331	0.576128	Aftph
GO:0017119	Golgi transport complex	1/1849	9/20331	0.576128	Cog1
GO:0020005	symbiont-containing vacuole membrane	1/1849	9/20331	0.576128	Gbp3
GO:0030127	COPII vesicle coat	1/1849	9/20331	0.576128	Sec24b
GO:0030877	beta-catenin destruction complex	1/1849	9/20331	0.576128	Ctnnb1
GO:0031083	BLOC-1 complex	1/1849	9/20331	0.576128	Bloc1s6
GO:0038201	TOR complex	1/1849	9/20331	0.576128	Prr5l
GO:0071007	U2-type catalytic step 2 spliceosome	1/1849	9/20331	0.576128	Cwc22
GO:0072546	ER membrane protein complex	1/1849	9/20331	0.576128	Mmgt2
GO:0097224	sperm connecting piece	1/1849	9/20331	0.576128	Spata6l
GO:0098992	neuronal dense core vesicle	1/1849	9/20331	0.576128	Npy
GO:0005912	adherens junction	9/1849	101/20331	0.576222	Ctnnb1/Wtip/Sh3bp1/Shroom1/Pkp2/Arvcf/Vcl/Adam10/Ppp1r9b
GO:0120111	neuron projection cytoplasm	4/1849	44/20331	0.576403	Bloc1s6/Spast/Ada/Zc3h14
GO:0043296	apical junction complex	12/1849	135/20331	0.577061	Cldn3/Ctnnb1/Eppk1/Sh3bp1/Shroom1/Tjp1/Sapcd2/Cldn2/Atp7b/Ocln/Tgfbr1/Bves
GO:0005868	cytoplasmic dynein complex	2/1849	21/20331	0.581444	Dynlt1c/Dctn4
GO:0030057	desmosome	2/1849	21/20331	0.581444	Pkp2/Dsp
GO:0097386	glial cell projection	2/1849	21/20331	0.581444	Adgrg1/Mapt
GO:0097546	ciliary base	2/1849	21/20331	0.581444	Kcnq1/Ift56
GO:0099522	region of cytosol	2/1849	21/20331	0.581444	Fbxo45/Sh3gl2
GO:0016591	RNA polymerase II, holoenzyme	5/1849	56/20331	0.58492	Leo1/Taf5l/Gtf2a2/Taf13/Polr2d
GO:0071013	catalytic step 2 spliceosome	3/1849	33/20331	0.587967	Aqr/Cwc22/Hnrnpa3
GO:0098858	actin-based cell projection	13/1849	149/20331	0.604349	Ctnnb1/Cyfip1/Wwox/Cd44/Podxl/Adgra2/Lyz1/Ppp1r9a/Abi1/Ceacam20/Abitram/Prom1/Ppp1r9b
GO:0045335	phagocytic vesicle	6/1849	69/20331	0.607111	Snx3/Stx6/Rab9/Rab5a/Pip4p2/Unc13b
GO:0031201	SNARE complex	2/1849	22/20331	0.607256	Stx6/Bloc1s6
GO:0005833	hemoglobin complex	1/1849	10/20331	0.614694	Hbb-bs
GO:0005885	Arp2/3 protein complex	1/1849	10/20331	0.614694	Actr3
GO:0008250	oligosaccharyltransferase complex	1/1849	10/20331	0.614694	Ddost
GO:0016272	prefoldin complex	1/1849	10/20331	0.614694	Gm13612
GO:0018995	host cellular component	1/1849	10/20331	0.614694	Gbp3
GO:0020003	symbiont-containing vacuole	1/1849	10/20331	0.614694	Gbp3
GO:0030430	host cell cytoplasm	1/1849	10/20331	0.614694	Gbp3
GO:0032982	myosin filament	1/1849	10/20331	0.614694	Myh10
GO:0033643	host cell part	1/1849	10/20331	0.614694	Gbp3
GO:0033646	host intracellular part	1/1849	10/20331	0.614694	Gbp3
GO:0033655	host cell cytoplasm part	1/1849	10/20331	0.614694	Gbp3
GO:0034045	phagophore assembly site membrane	1/1849	10/20331	0.614694	Atg2b
GO:0034719	SMN-Sm protein complex	1/1849	10/20331	0.614694	Gemin6
GO:0035098	ESC/E(Z) complex	1/1849	10/20331	0.614694	Rbbp7
GO:0042583	chromaffin granule	1/1849	10/20331	0.614694	Penk
GO:0043656	host intracellular region	1/1849	10/20331	0.614694	Gbp3
GO:0043657	host cell	1/1849	10/20331	0.614694	Gbp3
GO:0044666	MLL3/4 complex	1/1849	10/20331	0.614694	Dydc2
GO:0045179	apical cortex	1/1849	10/20331	0.614694	Sapcd2
GO:0098644	complex of collagen trimers	1/1849	10/20331	0.614694	Col16a1
GO:0005643	nuclear pore	5/1849	58/20331	0.616713	Nxf1/Pom121/Nup205/Nup160/Tnks
GO:0090734	site of DNA damage	5/1849	58/20331	0.616713	Exd2/Gm33950/Smc6/Ercc6/Adprs
GO:0034399	nuclear periphery	7/1849	82/20331	0.62605	Cenpf/Nup205/Dgkq/Morc2a/Nufip1/Mapt/Hlcs
GO:0030670	phagocytic vesicle membrane	3/1849	35/20331	0.628628	Rab9/Rab5a/Pip4p2
GO:0005721	pericentric heterochromatin	2/1849	23/20331	0.631837	Cenpa/Zfp618
GO:0097225	sperm midpiece	2/1849	23/20331	0.631837	Slc26a6/Slc26a3
GO:0099699	integral component of synaptic membrane	11/1849	129/20331	0.633754	Grin2d/P2rx6/Nrp2/Slc30a1/Lrfn4/Lrrc4b/1700034H15Rik/Adam23/Nptn/Adcy1/Kcnc3
GO:0015935	small ribosomal subunit	9/1849	106/20331	0.635238	Ddx3x/Mrps34/Rps24/Mrps31/Larp4/Gm5928/Gm9354/Mrps2/Gm15483
GO:0000813	ESCRT I complex	1/1849	11/20331	0.649753	Ubap1
GO:0005845	mRNA cap binding complex	1/1849	11/20331	0.649753	Cyfip1
GO:0016282	eukaryotic 43S preinitiation complex	1/1849	11/20331	0.649753	Eif3f
GO:0030132	clathrin coat of coated pit	1/1849	11/20331	0.649753	Sgip1
GO:0031414	N-terminal protein acetyltransferase complex	1/1849	11/20331	0.649753	Naa25
GO:0032797	SMN complex	1/1849	11/20331	0.649753	Gemin6
GO:0036038	MKS complex	1/1849	11/20331	0.649753	Cep290
GO:0065010	extracellular membrane-bounded organelle	1/1849	11/20331	0.649753	Gbp3
GO:0070993	translation preinitiation complex	1/1849	11/20331	0.649753	Eif3f
GO:0097504	Gemini of coiled bodies	1/1849	11/20331	0.649753	Gemin6
GO:0098981	cholinergic synapse	1/1849	11/20331	0.649753	Pld1
GO:0005640	nuclear outer membrane	2/1849	24/20331	0.655199	Dhcr7/Nucb2
GO:0097729	9+2 motile cilium	9/1849	108/20331	0.657545	Slc26a6/Catspere2/Cfap251/Scnn1a/Slc26a3/Gas8/Spata6l/Septin4/Mns1
GO:0005884	actin filament	5/1849	61/20331	0.661597	Kptn/Wipf1/Cd2ap/Ehbp1/Avil
GO:0005929	cilium	44/1849	511/20331	0.672623	Kcnq1/Sord/Aurka/Ankmy2/Cenpf/Kifap3/Slc26a6/Cep162/Pcm1/Txndc15/Catspere2/Iqcb1/Cfap251/Ift56/Togaram1/Scnn1a/Gm47324/Cct4/Dnaaf2/Iqcd/Slc26a3/Gas8/Mapt/Fam161a/Wdpcp/Dnaaf1/Cfap157/Odf2l/Spata6l/Tedc1/Ttbk2/Tbc1d30/Cep19/Bbof1/Glis2/Mapre1/2700049A03Rik/Rapgef4/Septin4/Togaram2/Mns1/Macir/Cep290/Cdk20
GO:0000428	DNA-directed RNA polymerase complex	6/1849	74/20331	0.675289	Leo1/Taf5l/Gtf2a2/Taf13/Polr2d/Polr3g
GO:0055029	nuclear DNA-directed RNA polymerase complex	6/1849	74/20331	0.675289	Leo1/Taf5l/Gtf2a2/Taf13/Polr2d/Polr3g
GO:0005681	spliceosomal complex	12/1849	145/20331	0.676652	Aqr/Cwc22/Snrnp48/Snrnp35/Gm33178/Prpf38a/Dhx16/Wac/Lsm8/Rbm41/Hnrnpa3/Lsm5
GO:0000408	EKC/KEOPS complex	1/1849	12/20331	0.681623	Trp53rka
GO:0005666	RNA polymerase III complex	1/1849	12/20331	0.681623	Polr3g
GO:0005838	proteasome regulatory particle	1/1849	12/20331	0.681623	Psmd6
GO:0005869	dynactin complex	1/1849	12/20331	0.681623	Dctn4
GO:0016010	dystrophin-associated glycoprotein complex	1/1849	12/20331	0.681623	Krt19
GO:0031314	extrinsic component of mitochondrial inner membrane	1/1849	12/20331	0.681623	Coq6
GO:0036128	CatSper complex	1/1849	12/20331	0.681623	Catspere2
GO:0072687	meiotic spindle	1/1849	12/20331	0.681623	Aurka
GO:0090665	glycoprotein complex	1/1849	12/20331	0.681623	Krt19
GO:1990023	mitotic spindle midzone	1/1849	12/20331	0.681623	Prc1
GO:0034704	calcium channel complex	4/1849	51/20331	0.69338	Catspere2/Cacna1b/Cachd1/Cacna2d4
GO:0044391	ribosomal subunit	26/1849	310/20331	0.697395	Ddx3x/Mrps34/Gm4786/Rps24/Gm36556/Mrpl47/Gm17415/Mrpl16/Mrpl36/Mrpl44/Ndufab1/Mrpl32/Mrps31/Mrpl15/Larp4/Gm5928/Gm9354/Gm14853/Gm8062/Mrpl3/Mrps2/Rplp2-ps1/Gm8586/AA413626/Gm15483/Nsun4
GO:0000228	nuclear chromosome	22/1849	264/20331	0.698463	Ctc1/Pole4/Morf4l1-ps1/Kifap3/Birc5/Rec8/Zbtb32/Wapl/Nifk/Smarca2/Nufip1/Csnk2a1-ps3/Rbbp7/Uchl5/Dpf1/Terf1/Syce3/Ss18l1/Dpf3/Syce2/Orc3/Terf2ip
GO:0015934	large ribosomal subunit	17/1849	206/20331	0.698737	Gm4786/Gm36556/Mrpl47/Gm17415/Mrpl16/Mrpl36/Mrpl44/Ndufab1/Mrpl32/Mrpl15/Gm14853/Gm8062/Mrpl3/Rplp2-ps1/Gm8586/AA413626/Nsun4
GO:0043204	perikaryon	10/1849	124/20331	0.700742	Itga8/Mgat5/Kcnb1/Naip1/Npy/Amigo1/Kcne3/Nucb2/Septin4/Kcnc3
GO:0030014	CCR4-NOT complex	1/1849	13/20331	0.710595	Patl1
GO:0030867	rough endoplasmic reticulum membrane	1/1849	13/20331	0.710595	Zc3h12a
GO:0034518	RNA cap binding complex	1/1849	13/20331	0.710595	Cyfip1
GO:0035102	PRC1 complex	1/1849	13/20331	0.710595	Cbx2
GO:0042575	DNA polymerase complex	1/1849	13/20331	0.710595	Pole4
GO:0042824	MHC class I peptide loading complex	1/1849	13/20331	0.710595	Pdia3
GO:0043218	compact myelin	1/1849	13/20331	0.710595	Pllp
GO:0030880	RNA polymerase complex	6/1849	77/20331	0.712332	Leo1/Taf5l/Gtf2a2/Taf13/Polr2d/Polr3g
GO:0016363	nuclear matrix	5/1849	65/20331	0.715893	Cenpf/Dgkq/Morc2a/Nufip1/Hlcs
GO:0055038	recycling endosome membrane	3/1849	40/20331	0.717717	Mcoln2/Abhd17b/Zfyve27
GO:0051233	spindle midzone	2/1849	27/20331	0.718181	Aurka/Prc1
GO:0033176	proton-transporting V-type ATPase complex	2/1849	28/20331	0.736908	Tmem199/Atp6ap2
GO:0000153	cytoplasmic ubiquitin ligase complex	1/1849	14/20331	0.736932	Fam8a1
GO:0005779	integral component of peroxisomal membrane	1/1849	14/20331	0.736932	Pex11b
GO:0030992	intraciliary transport particle B	1/1849	14/20331	0.736932	Ift56
GO:0031011	Ino80 complex	1/1849	14/20331	0.736932	Uchl5
GO:0031231	intrinsic component of peroxisomal membrane	1/1849	14/20331	0.736932	Pex11b
GO:0033162	melanosome membrane	1/1849	14/20331	0.736932	Tyr
GO:0033202	DNA helicase complex	1/1849	14/20331	0.736932	Uchl5
GO:0042599	lamellar body	1/1849	14/20331	0.736932	Abca3
GO:0043240	Fanconi anaemia nuclear complex	1/1849	14/20331	0.736932	Fancc
GO:0045009	chitosome	1/1849	14/20331	0.736932	Tyr
GO:0090741	pigment granule membrane	1/1849	14/20331	0.736932	Tyr
GO:0099059	integral component of presynaptic active zone membrane	1/1849	14/20331	0.736932	Nptn
GO:0030018	Z disc	6/1849	80/20331	0.746367	Parva/Krt19/Ctnnb1/Hrc/Nos1/Synpo2
GO:0000793	condensed chromosome	15/1849	189/20331	0.746936	Cenpa/Cenpf/Kifap3/Rec8/Wapl/Nifk/Gm33950/Smc6/Spdl1/Nsl1/Syce3/Ss18l1/2700099C18Rik/Syce2/Sgo2a
GO:0045259	proton-transporting ATP synthase complex	3/1849	42/20331	0.748367	Gm6581/Atp5d/Atp5b
GO:1990904	ribonucleoprotein complex	59/1849	702/20331	0.759741	Myh10/Ddx3x/Aqr/Cwc22/Mrps34/Gm4786/Srp54c/Riok2/Imp4/Rps24/Gm36556/Mrpl47/Gm17415/Snrnp48/Mrpl16/Mrpl36/Mrpl44/Ndufab1/Snrnp35/Casp8/Mrpl32/Utp4/Mrps31/Gm33178/Nufip1/Mrpl15/Prpf38a/Larp4/Eif3f/Dhx16/Gm39518/Gm5928/Wac/Gm9354/Lsm8/Wdr36/Gm14853/Nsrp1/Gm8062/Ago4/Mrpl3/Mrps2/Rnf135/Rbm41/Rplp2-ps1/Gm8586/Gm20156/Zc3h14/Rbm12b1/AA413626/Gm15483/Srp54a/Nsun4/Dcp2/Imp3/Ago1/Hnrnpa3/Ltv1/Lsm5
GO:0000800	lateral element	1/1849	15/20331	0.760873	Rec8
GO:0001891	phagocytic cup	1/1849	15/20331	0.760873	Sh3bp1
GO:0043186	P granule	1/1849	15/20331	0.760873	Exd1
GO:0060293	germ plasm	1/1849	15/20331	0.760873	Exd1
GO:0005637	nuclear inner membrane	3/1849	43/20331	0.762663	P2rx6/Tmpo/Tmem43
GO:0009925	basal plasma membrane	3/1849	43/20331	0.762663	Slc27a1/Itgb4/Slc23a2
GO:0005871	kinesin complex	2/1849	30/20331	0.771183	Kifap3/Kif20a
GO:0022626	cytosolic ribosome	11/1849	145/20331	0.777434	Ddx3x/Gm4786/Rps24/Gm36556/Gm17415/Larp4/Gm5928/Gm9354/Gm14853/Rplp2-ps1/Gm15483
GO:0001518	voltage-gated sodium channel complex	1/1849	16/20331	0.782636	Scn8a
GO:0016514	SWI/SNF complex	1/1849	16/20331	0.782636	Smarca2
GO:0045495	pole plasm	1/1849	16/20331	0.782636	Exd1
GO:0090543	Flemming body	1/1849	16/20331	0.782636	Cep55
GO:0098945	intrinsic component of presynaptic active zone membrane	1/1849	16/20331	0.782636	Nptn
GO:0099524	postsynaptic cytosol	1/1849	16/20331	0.782636	Fbxo45
GO:0005753	mitochondrial proton-transporting ATP synthase complex	2/1849	31/20331	0.786812	Atp5d/Atp5b
GO:0032838	plasma membrane bounded cell projection cytoplasm	12/1849	159/20331	0.790399	Cenpf/Kifap3/Bloc1s6/Cep162/Spast/Gas8/Mapt/Wdpcp/Dnaaf1/Ada/Zc3h14/Mns1
GO:0016469	proton-transporting two-sector ATPase complex	5/1849	72/20331	0.795375	Gm6581/Atp5d/Atp5b/Tmem199/Atp6ap2
GO:0005771	multivesicular body	2/1849	32/20331	0.801494	Abca3/Laptm4b
GO:0101031	chaperone complex	1/1849	17/20331	0.80242	Cct4
GO:0005930	axoneme	8/1849	112/20331	0.809633	Cenpf/Kifap3/Cep162/Gas8/Mapt/Wdpcp/Dnaaf1/Mns1
GO:0045111	intermediate filament cytoskeleton	16/1849	211/20331	0.811065	Krt19/Eppk1/Prph/Ndor1/Nefm/Exd2/Nol9/Nes/Smarca2/Pkp2/Pcp4/Krt10/Iffo2/Gper1/Nefh/Mns1
GO:0097014	ciliary plasm	8/1849	113/20331	0.817246	Cenpf/Kifap3/Cep162/Gas8/Mapt/Wdpcp/Dnaaf1/Mns1
GO:0002102	podosome	1/1849	18/20331	0.820404	Sh3pxd2b
GO:0005775	vacuolar lumen	1/1849	18/20331	0.820404	Prtn3
GO:0022624	proteasome accessory complex	1/1849	18/20331	0.820404	Psmd6
GO:0031430	M band	1/1849	18/20331	0.820404	Nbr1
GO:0035371	microtubule plus-end	1/1849	18/20331	0.820404	Mapre1
GO:0031674	I band	6/1849	88/20331	0.822607	Parva/Krt19/Ctnnb1/Hrc/Nos1/Synpo2
GO:0005905	clathrin-coated pit	3/1849	48/20331	0.824488	Sgip1/Sort1/Lrp12
GO:0005791	rough endoplasmic reticulum	5/1849	76/20331	0.832298	Zc3h12a/Car4/Hgfac/Rangrf/Lyz1
GO:0097346	INO80-type complex	1/1849	19/20331	0.836752	Uchl5
GO:0031312	extrinsic component of organelle membrane	2/1849	35/20331	0.840278	Zc3h12a/Coq6
GO:0031672	A band	2/1849	35/20331	0.840278	Nbr1/Myl4
GO:0034708	methyltransferase complex	5/1849	77/20331	0.840629	Rbbp7/Wtap/Dydc2/Trmt6/Wdr5b
GO:0031514	motile cilium	12/1849	167/20331	0.840915	Sord/Slc26a6/Catspere2/Cfap251/Ift56/Scnn1a/Iqcd/Slc26a3/Gas8/Spata6l/Septin4/Mns1
GO:0097733	photoreceptor cell cilium	5/1849	78/20331	0.848617	Kifap3/Iqcb1/Fam161a/Rapgef4/Cep290
GO:0030990	intraciliary transport particle	1/1849	20/20331	0.851612	Ift56
GO:0036452	ESCRT complex	1/1849	20/20331	0.851612	Ubap1
GO:0048787	presynaptic active zone membrane	1/1849	20/20331	0.851612	Nptn
GO:1902555	endoribonuclease complex	1/1849	20/20331	0.851612	Tsen2
GO:0046540	U4/U6 x U5 tri-snRNP complex	1/1849	21/20331	0.865121	Lsm8
GO:0097526	spliceosomal tri-snRNP complex	1/1849	21/20331	0.865121	Lsm8
GO:0031045	dense core granule	1/1849	22/20331	0.8774	Npy
GO:0070971	endoplasmic reticulum exit site	1/1849	22/20331	0.8774	Sec24b
GO:0001750	photoreceptor outer segment	3/1849	55/20331	0.887564	Iqcb1/Rapgef4/Cep290
GO:0034364	high-density lipoprotein particle	1/1849	23/20331	0.888562	Lcat
GO:0035267	NuA4 histone acetyltransferase complex	1/1849	23/20331	0.888562	Morf4l1-ps1
GO:0043189	H4/H2A histone acetyltransferase complex	1/1849	23/20331	0.888562	Morf4l1-ps1
GO:0098889	intrinsic component of presynaptic membrane	4/1849	70/20331	0.890571	Adam23/Nptn/Kcnc3/Cntn1
GO:0005684	U2-type spliceosomal complex	2/1849	41/20331	0.897924	Cwc22/Dhx16
GO:0005844	polysome	2/1849	41/20331	0.897924	Myh10/Larp4
GO:0016592	mediator complex	2/1849	41/20331	0.897924	Med9/Med18
GO:0035861	site of double-strand break	2/1849	41/20331	0.897924	Gm33950/Smc6
GO:0005882	intermediate filament	12/1849	179/20331	0.898441	Krt19/Eppk1/Prph/Nefm/Nes/Pkp2/Pcp4/Krt10/Iffo2/Gper1/Nefh/Mns1
GO:0001673	male germ cell nucleus	1/1849	24/20331	0.898708	Rec8
GO:0005669	transcription factor TFIID complex	1/1849	24/20331	0.898708	Taf13
GO:1905348	endonuclease complex	1/1849	24/20331	0.898708	Tsen2
GO:0097731	9+0 non-motile cilium	5/1849	87/20331	0.906542	Kifap3/Iqcb1/Fam161a/Rapgef4/Cep290
GO:0035097	histone methyltransferase complex	3/1849	59/20331	0.913709	Rbbp7/Dydc2/Wdr5b
GO:0005680	anaphase-promoting complex	1/1849	26/20331	0.916314	Anapc16
GO:0005875	microtubule associated complex	8/1849	131/20331	0.917628	Aurka/Dynlt1c/Dnal4/Kifap3/Birc5/Haus2/Dctn4/Kif20a
GO:0000152	nuclear ubiquitin ligase complex	2/1849	44/20331	0.918845	Anapc16/Cbx2
GO:0034707	chloride channel complex	2/1849	44/20331	0.918845	Slc26a6/Gm31598
GO:0030286	dynein complex	3/1849	62/20331	0.929547	Dynlt1c/Dnal4/Dctn4
GO:0044304	main axon	2/1849	46/20331	0.930474	Mapt/Kcnc3
GO:0034358	plasma lipoprotein particle	1/1849	29/20331	0.937158	Lcat
GO:1990777	lipoprotein particle	1/1849	29/20331	0.937158	Lcat
GO:0099056	integral component of presynaptic membrane	3/1849	64/20331	0.93857	Adam23/Nptn/Kcnc3
GO:0060170	ciliary membrane	2/1849	48/20331	0.940514	Txndc15/Scnn1a
GO:0032994	protein-lipid complex	1/1849	30/20331	0.942882	Lcat
GO:0045263	proton-transporting ATP synthase complex, coupling factor F(o)	1/1849	30/20331	0.942882	Gm6581
GO:0009986	cell surface	63/1849	826/20331	0.943375	Hspa5/Wnt5a/Iglc2/Kcnq1/Itga8/Lrp4/Iglc3/Car4/Ermap/Ltf/Gpihbp1/Layn/Cdh17/Kcnb1/Eno1b/Ror2/Pdia3/Adgra2/Tyro3/Gsr/Fgfr3/Sema6c/Ighv1-59/Prlr/Itgb4/Lrfn4/Il3ra/Nt5e/Scnn1a/Igha/Slc4a3/Cd53/Slamf9/Epha2/Atp5b/Cd27/Cdh13/Scube2/Entpd1/Cd55/Btnl2/Grem1/Nptn/Ada/Adam10/Cd83/Atp6ap2/Tnfrsf10b/Abcg2/Sirpa/Sort1/Tnfrsf18/Icos/Adgre1/Ocln/Il1rl1/Tgfbr1/Btnl4/Trbc1/Tgfa/Scara5/Gp1ba/Trbc2
GO:0022625	cytosolic large ribosomal subunit	5/1849	96/20331	0.94409	Gm4786/Gm36556/Gm17415/Gm14853/Rplp2-ps1
GO:0098552	side of membrane	44/1849	599/20331	0.946815	Iglc2/Iglc3/Car4/Ermap/Gpihbp1/Snx18/Traf3/Gsr/Ighv1-59/Prlr/Gnb5/Il3ra/Nt5e/Scnn1a/Gng4/Igha/Slc4a3/Mapt/Rab5a/Gnao1/Cd27/Cdh13/Entpd1/Cd55/Btnl2/Ada/Gng11/Cd83/Atp6ap2/Abcg2/Tnfrsf18/Icos/Adgre1/Ppp1r9b/Alox15/Il1rl1/Btnl4/Trbc1/Epm2aip1/Scara5/Atp2c2/Gphn/Gp1ba/Trbc2
GO:0097730	non-motile cilium	6/1849	114/20331	0.953689	Kifap3/Iqcb1/Fam161a/Glis2/Rapgef4/Cep290
GO:0043198	dendritic shaft	1/1849	34/20331	0.961018	Gper1
GO:0016459	myosin complex	2/1849	54/20331	0.963	Myh10/Myo19
[truncated: 13 more rows]

## Sheet: LAST VS CPG.BP(MF)
Table S6. Significantly Enriched upregulated and downregulated GO (MF) terms in LAST versus CPG group
[truncated: 1,717 more rows]
