# Supplementary material for: Deciphering Microbiome, Transcriptome, and Metabolic Interactions in the Presence of Probiotic Lactobacillus acidophilus against Salmonella Typhimurium in a Murine Model
Source: Antibiotics (Basel). 2024 Apr 11;13(4):352. doi: 10.3390/antibiotics13040352 (PMC11047355; doi:10.3390/antibiotics13040352)
Supplement: Supplementary file 1 [file antibiotics-13-00352-s001.zip › Table supplementary S7.xlsx]

## Sheet: KEGG Enrichment..LAST VS CPG
Table S7. KEGG Pathways analysis Of Top 30 Differentially Expressed Genes between LAST VS CPG.
ID	Description	GeneRatio	BgRatio	pvalue	geneID
ko05415	Diabetic cardiomyopathy	34/821	171/8497	3.22442e-05	Cpt2/Slc2a4/Paqr4/Gm12992/Mpc1/Uqcrc1/Ndufab1/Cox6a1/Ndufs5-ps/Gsr/Plcb4/Mcpt4/COX2/Ndufs6b/Ppp1cb/Ndufb9/Atp5d/Tbc1d4/Gm6498/Gm54042/Ndufv3/Gm44502/Cox8b/Gapdh/Uqcrb/Cox4i1/Gm12070/Gm34303/Cox5b/Pik3cb/Tgfbr1/Cox8a/COX1/Nos3
ko04711	Circadian rhythm - fly	4/821	8497-05-01	0.000399604	Gm35591/Bmal1/Per2/Clock
ko00480	Glutathione metabolism	14/821	55/8497	0.000555067	Gstm2/Gstp1/Gpx2/Mgst1/Ggt6/Gm8234/Srm/Gstm7/Gsr/Nat8/Gstp-ps/Mgst2/Gpx2-ps1/Mgst3
ko05010	Alzheimer disease	49/821	328/8497	0.00123879	Wnt5a/Frat1/Atg2b/Gna11/Gm12992/Grin2d/Dkk2/Uqcrc1/Ndufab1/Psma2/Casp8/Cox6a1/Ndufs5-ps/Slc39a5/Plcb4/Psmd6/Slc39a3/Frat2/COX2/Nos1/Ndufs6b/Ndufb9/Kif5a/Atp5d/Gm6498/Grin1/Ikbkb/Ppp3cb/Mapt/Gm54042/Ndufv3/Cacna1c/Slc39a11/Cox8b/Adam10/Gapdh/Uqcrb/Csf1/Cox4i1/Gm12070/Ctnnal1/Gm34303/Ikbkg/Gm35596/Cox5b/Pik3cb/Cox8a/COX1/Psma5
ko00240	Pyrimidine metabolism	12/821	49/8497	0.00194759	Nme6/Gm16867/Entpd4/Entpd4b/Nt5e/Nme7/Dctd/Upb1/Entpd1/Dck/Dhodh/Nt5c3
ko00062	Fatty acid elongation	8/821	26/8497	0.00235821	Hacd2/Acot7/Mecr/Hadhb/Elovl5/Acot4/Hacd1/Acot2
ko05132	Salmonella infection	33/821	210/8497	0.00333806	Tab1/Cyfip1/Dynlt1c/Gm12992/Elmo2/Snx18/Pik3cg/Naip1/Podxl/Mlkl/Casp8/Map3k7/Tcf7l1/Pkn3/Kif5a/Il18/Stimate/Gm6498/Ikbkb/Isoc1/Dynlt1a/Nrg4/Gapdh/Dctn4/Tnfrsf10b/Fyco1/Casp1/Gm12070/Vps33a/Ikbkg/Pik3cb/Actr3/Syngr4
ko04714	Thermogenesis	33/821	211/8497	0.00360255	Cpt2/Kdm3b/Coa6/Uqcrc1/Ndufab1/Cox6a1/Cox18/Ndufs5-ps/Creb3l2/Adrb3/Smarca2/COX2/Ndufs6b/Ndufb9/Cpt1a/Gm6581/Atp5d/Dpf1/Isoc1/Sirt6/Gm54042/Ndufv3/Gm44502/Kdm3a/Cox8b/Uqcrb/Adcy1/Cox4i1/Gm34303/Dpf3/Cox5b/Cox8a/COX1
ko05208	Chemical carcinogenesis - reactive oxygen species	31/821	195/8497	0.00366016	Gstm2/Gstp1/Gm12992/Mgst1/Uqcrc1/Ndufab1/Slc26a6/Cox6a1/Ndufs5-ps/Gstm7/Gstp-ps/COX2/Ndufs6b/Ndufb9/Atp5d/Pld1/Ikbkb/Gm54042/Ndufv3/Cox8b/Uqcrb/Mgst2/Cox4i1/Hmces/Gm34303/Ikbkg/Mgst3/Cox5b/Pik3cb/Cox8a/COX1
ko00680	Methane metabolism	7/821	23/8497	0.0047103	Pgam1/Glyctk/Eno1b/E130215H24Rik/Eno4/Shmt1/Psat1
ko05014	Amyotrophic lateral sclerosis	46/821	328/8497	0.00595133	Atg2b/Rab1a/Prph/Nxf1/Grin2d/Pom121/Gpx2/Nup205/Uqcrc1/Ndufab1/Psma2/Nefm/Cox6a1/Ndufs5-ps/Nup160/Psmd6/Prkn/COX2/Nos1/Ndufs6b/Ndufb9/Kif5a/Atp5d/Grin1/Ppp3cb/Isoc1/Gm54042/Ndufv3/Ubqln2/Cox8b/Nrg4/Uqcrb/Dctn4/Gpx2-ps1/Srsf3/Casp1/Cox4i1/Nefh/Gm34303/Fig4/Cox5b/N4bp2l1/Cox8a/COX1/Psma5/Tmem223
ko00630	Glyoxylate and dicarboxylate metabolism	7/821	24/8497	0.00610569	Glyctk/Grhpr/Dld/E130215H24Rik/Mmut/Pcca/Shmt1
ko00260	Glycine, serine and threonine metabolism	9/821	38/8497	0.00877088	Pgam1/Glyctk/Maob/Grhpr/Cth/Dld/Cbs/Shmt1/Psat1
ko05016	Huntington disease	37/821	259/8497	0.00965029	Atg2b/Gna11/Paqr4/Polr2i/Gpx2/Uqcrc1/Ndufab1/Psma2/Casp8/Cox6a1/Ndufs5-ps/Ep300/Plcb4/Creb3l2/Psmd6/COX2/Ndufs6b/Ndufb9/Kif5a/Atp5d/Grin1/Cacna1b/Gm54042/Ndufv3/Cox8b/Uqcrb/Dctn4/Gpx2-ps1/Stx1a/Cox4i1/Gm34303/Polr2d/Cox5b/N4bp2l1/Cox8a/COX1/Psma5
ko05161	Hepatitis B	22/821	135/8497	0.0098804	Tab1/Ddx3x/Gm12992/Map3k1/Ywhab/Birc5/Casp8/Traf3/Map3k7/Ifih1/Ep300/Creb3l2/Elk1/Ikbkb/Isoc1/Mavs/Egr2/Ikbkg/Pik3cb/Tgfbr1/Cdk2/Syngr4
ko01524	Platinum drug resistance	14/821	74/8497	0.0103863	Gstm2/Gstp1/Gm12992/Mgst1/Birc5/Casp8/Gstm7/Gstp-ps/Zfp608/Atp7b/Mgst2/Top2b/Mgst3/Pik3cb
ko00562	Inositol phosphate metabolism	13/821	67/8497	0.010769	Inpp5j/Impa1/Gm12992/Pik3cg/Mtmr14/Plcb4/Plcd3/Plch2/Mtmr7/Minpp1/Mtmr2/Fig4/Pik3cb
ko04668	TNF signaling pathway	18/821	105/8497	0.0112521	Tab1/Gm12992/Mlkl/Casp8/Traf3/Map3k7/Creb3l2/Ccl20/Ikbkb/Isoc1/9930111J21Rik1/Tnfaip3/Cxcl10/Csf1/Ifi47/Ikbkg/Pik3cb/Syngr4
ko04973	Carbohydrate digestion and absorption	8/821	33/8497	0.0114371	Sis/Hk1/Slc2a2/Gm12992/Plcb4/G6pc3/Mgam/Pik3cb
ko04710	Circadian rhythm	7/821	27/8497	0.0121382	Gm35591/Bmal1/Fbxl3/Per2/Cul1/Clock/Npas2
ko04611	Platelet activation	18/821	106/8497	0.0123721	Gna11/Gm12992/Pik3cg/Gucy1a1/Plcb4/Ppp1cb/Tln2/Pik3r5/Adcy1/Mylk4/Pik3r6/Gm35596/Pik3cb/Rap1a/Tbxa2r/Nos3/Gp1ba/Pla2g4c
ko05022	Pathways of neurodegeneration - multiple diseases	52/821	395/8497	0.0123788	Wnt5a/Frat1/Atg2b/Gna11/Rab1a/Prph/Grin2d/Gpx2/Dkk2/Uqcrc1/Ndufab1/Psma2/Casp8/Nefm/Cox6a1/Ndufs5-ps/Plcb4/Psmd6/Prkn/Frat2/COX2/Nos1/Ndufs6b/Ndufb9/Kif5a/Atp5d/Grin1/Ube2g1/Ppp3cb/Isoc1/Cacna1b/Mapt/Gm54042/Ndufv3/Cacna1c/Cox8b/Gm11517/Uqcrb/Dctn4/Gpx2-ps1/Csf1/Stx1a/Cox4i1/Nefh/Gm34303/Fig4/Gm35596/Cox5b/N4bp2l1/Cox8a/COX1/Psma5
ko04931	Insulin resistance	16/821	91/8497	0.012919	Slc2a4/Slc2a2/Gm12992/Creb3l2/Slc27a1/Slc27a3/Ppp1cb/Cpt1a/G6pc3/Tbc1d4/Ppp1r3d/Ikbkb/Gm44502/Hmces/Pik3cb/Nos3
ko04924	Renin secretion	14/821	76/8497	0.0130768	Gna11/Gucy1a1/Plcb4/Adrb3/Ptger2/Ppp3cb/Edn2/Cacna1c/Gm52890/Clca3a1/Ptger4/Pde3a/Gm35596/Clca4a
ko00010	Glycolysis / Gluconeogenesis	13/821	69/8497	0.0137174	Pgam1/Pdhx/Hk1/Eno1b/Dld/E130215H24Rik/G6pc3/Gm6498/Minpp1/Eno4/Adpgk/Gapdh/Gm12070
ko04622	RIG-I-like receptor signaling pathway	13/821	69/8497	0.0137174	Ddx3x/Map3k1/Casp8/Traf3/Map3k7/Ifih1/Tbkbp1/Ikbkb/Mavs/Cxcl10/Ikbkg/Zfp385b/Sike1
ko04932	Non-alcoholic fatty liver disease	21/821	131/8497	0.0138015	Gm12992/Uqcrc1/Ndufab1/Casp8/Cox6a1/Ndufs5-ps/COX2/Ndufs6b/Ndufb9/9130221H12Rik/Ikbkb/Gm54042/Ndufv3/Cox8b/Uqcrb/Cox4i1/Gm34303/Cox5b/Pik3cb/Cox8a/COX1
ko04720	Long-term potentiation	11/821	55/8497	0.0146369	Gna11/Grin2d/Ep300/Plcb4/Ppp1cb/Grin1/Ppp3cb/Cacna1c/Adcy1/Gm35596/Rap1a
ko00450	Selenocompound metabolism	5/821	16/8497	0.0147027	Cth/Mtr/Txnrd3/Kyat3/Pstk
ko04725	Cholinergic synapse	15/821	85/8497	0.0152801	Kcnq1/Kcnj6/Gna11/Gm12992/Pik3cg/Plcb4/Creb3l2/Pik3r5/Cacna1b/Gnao1/Cacna1c/Adcy1/Pik3r6/Gm35596/Pik3cb
ko04260	Cardiac muscle contraction	13/821	70/8497	0.0154061	Uqcrc1/Cox6a1/Myl4/COX2/Cacna1c/Cox8b/Uqcrb/Cox4i1/Gm34303/Cox5b/Cox8a/COX1/Cacna2d4
ko05230	Central carbon metabolism in cancer	11/821	56/8497	0.0166769	Pgam1/Sirt3/Hk1/Slc2a2/Gm12992/Fgfr3/Gls2/Tigar/Sirt6/Ret/Pik3cb
ko00983	Drug metabolism - other enzymes	15/821	86/8497	0.0169137	Nme6/Gstm2/Ces1e/Gstp1/Mgst1/Gstm7/Itpa/Gstp-ps/Ugt2b34/Nme7/Upb1/Ces2c/Ces2g/Mgst2/Mgst3
ko00270	Cysteine and methionine metabolism	10/821	49/8497	0.0169973	Enoph1/Gm8234/Srm/Cth/Ahcyl1/Mtr/Cbs/Kyat3/Dnmt3b/Psat1
ko05225	Hepatocellular carcinoma	21/821	134/8497	0.0175515	Wnt5a/Gstm2/Frat1/Gstp1/Gm12992/Mgst1/Tcf7l1/Gstm7/Elk1/Smarca2/Gstp-ps/Frat2/Igf2/Dpf1/Txnrd3/Mgst2/Dpf3/Mgst3/Pik3cb/Tgfbr1/Igf1r
ko04010	MAPK signaling pathway	35/821	253/8497	0.0184243	Tab1/Flt1/Mecom/Fgf9/Map3k1/Map3k7/Fgfr3/Elk1/Nr4a1/Igf2/Map3k13/Ikbkb/Ppp3cb/Isoc1/Cacna1b/Mapt/Rras2/Epha2/Cacna1h/Cacna1c/Pgf/Map3k20/Rasgrp3/Csf1/Stmn2/Ikbkg/Dusp6/Efna5/Tgfbr1/Rap1a/Cacna2d4/Pla2g4c/Syngr4/Igf1r/Efna3
ko04350	TGF-beta signaling pathway	13/821	73/8497	0.0214288	Paqr4/Dcn/Ltbp1/Ep300/Pitx2/Rgmb/5430405H02Rik/Cul1/E2f5/Ppp2cb/Zfyve16/Tgfbr1/Bmp7
ko04911	Insulin secretion	13/821	73/8497	0.0214288	Pdx1/Gna11/Slc2a2/Rims2/Plcb4/Creb3l2/Gip/Cacna1c/Kcnmb3/Rapgef4/Stx1a/Adcy1/Vamp2
ko04212	Longevity regulating pathway - worm	15/821	89/8497	0.0226233	Gstm2/Mt2/Gstp1/Gm12992/Hspa9/Mgst1/Ywhab/Gstm7/Washc3/Gstp-ps/Ppp4r3a/Cachd1/Mgst2/Mgst3/Pik3cb
ko04930	Type II diabetes mellitus	9/821	44/8497	0.0226596	Slc2a4/Pdx1/Hk1/Slc2a2/Gm12992/Ikbkb/Cacna1b/Cacna1c/Pik3cb
ko04122	Sulfur relay system	3/821	8497-07-01	0.023371	Ctu1/Mocs2/Syp
ko00220	Arginine biosynthesis	6/821	24/8497	0.0235901	Arg2/Nags/Nos1/Gls2/Otc/Nos3
ko01523	Antifolate resistance	6/821	24/8497	0.0235901	Fpgs/Abcc3/Ikbkb/Abcg2/Ikbkg/Shmt1
ko04728	Dopaminergic synapse	17/821	106/8497	0.0249611	Kcnj6/Gna11/Maob/Bmal1/Plcb4/Creb3l2/Ppp1cb/Kif5a/9130221H12Rik/Ppp3cb/Cacna1b/Gnao1/Clock/Ppp2cb/Cacna1c/Gm35596/Ppp2r2c
ko01040	Biosynthesis of unsaturated fatty acids	7/821	31/8497	0.0256398	Hacd2/Acot7/Fads1/Elovl5/Acot4/Hacd1/Acot2
ko04151	PI3K-Akt signaling pathway	40/821	305/8497	0.0275291	Ywhah/Itga8/Gm12992/Flt1/Fgf9/Lamb2/Pik3cg/Lama1/Ywhab/Fgfr3/Creb3l2/Nr4a1/Prlr/Itgb4/Pkn3/Il3ra/Igf2/G6pc3/Lamb3/Igha/Ikbkb/Pik3r5/Sgk3/Epha2/Ppp2cb/Itga11/Eif4e3/Pgf/Lama5/Csf1/Pik3r6/Ikbkg/Efna5/Pik3cb/Nos3/Ppp2r2c/Rbl2/Cdk2/Igf1r/Efna3
ko00052	Galactose metabolism	6/821	25/8497	0.0285803	Gaa/Sis/Hk1/G6pc3/Glb1/Mgam
ko00190	Oxidative phosphorylation	18/821	116/8497	0.0290352	Uqcrc1/Ndufab1/Cox6a1/Ndufs5-ps/COX2/Ndufs6b/Ndufb9/Gm6581/Atp5d/Gm54042/Ndufv3/Cox8b/Uqcrb/Cox4i1/Gm34303/Cox5b/Cox8a/COX1
ko05020	Prion disease	31/821	228/8497	0.0314923	Gm12992/Grin2d/Uqcrc1/Ndufab1/Psma2/Cox6a1/Ndufs5-ps/Creb3l2/Psmd6/COX2/Ndufs6b/Ndufb9/Kif5a/Atp5d/Grin1/Ppp3cb/Cacna1b/Gm54042/Ndufv3/Cacna1c/Cox8b/Uqcrb/Cox4i1/Gm34303/C6/Gm35596/Cox5b/Pik3cb/Cox8a/COX1/Psma5
ko00230	Purine metabolism	19/821	126/8497	0.0330807	Nme6/Ampd2/Gm16867/Entpd4/Gucy1a1/Entpd4b/Itpa/Pde8b/Nt5e/Pde6d/Nme7/Ampd3/Entpd1/Dck/Ada/Adcy1/Pde3a/Nt5c3/Gm52783
ko00521	Streptomycin biosynthesis	3/821	8497-08-01	0.0347493	Hk1/Impa1/Gpr180
ko04921	Oxytocin signaling pathway	18/821	121/8497	0.0419514	Kcnj6/Gna11/Pik3cg/Gucy1a1/Plcb4/Elk1/Ppp1cb/Ppp3cb/Pik3r5/Gnao1/Cacna1c/Adcy1/Mylk4/Pik3r6/Gm35596/Nos3/Cacna2d4/Pla2g4c
ko04713	Circadian entrainment	13/821	80/8497	0.0420665	Kcnj6/Gna11/Gm35591/Grin2d/Gucy1a1/Plcb4/Nos1/Per2/Grin1/Gnao1/Cacna1h/Cacna1c/Adcy1
ko04730	Long-term depression	9/821	49/8497	0.0427057	Gna11/Gucy1a1/Plcb4/Nos1/Gnao1/Ppp2cb/Gm35596/Pla2g4c/Igf1r
ko04670	Leukocyte transendothelial migration	14/821	89/8497	0.0454737	Cldn3/Gm12992/Ctnnd1/Itgal/Cldn2/Arhgap5/Arvcf/Vcl/Rapgef4/Itgam/Ocln/Pik3cb/Rassf5/Rap1a
ko04068	FoxO signaling pathway	15/821	98/8497	0.0484113	Slc2a4/Gm12992/Ep300/Bcl6/G6pc3/Ikbkb/Sgk3/Setd7/S1pr4/Pik3cb/Tgfbr1/Fbxo32/Rbl2/Cdk2/Igf1r
ko05145	Toxoplasmosis	15/821	98/8497	0.0484113	Tab1/Lamb2/Pik3cg/Lama1/Casp8/Map3k7/Lamb3/Ikbkb/Pik3r5/Isoc1/Gnao1/Lama5/Pik3r6/Ikbkg/Syngr4
ko00130	Ubiquinone and other terpenoid-quinone biosynthesis	3/821	8497-09-01	0.0484584	Vkorc1/Coq6/Ggcx
ko04015	Rap1 signaling pathway	28/821	210/8497	0.0487711	Gna11/Gm12992/Flt1/Fgf9/Ctnnd1/Plcb4/Fgfr3/Itgal/Sipa1l1/Tln2/Grin1/Arvcf/Isoc1/Epha2/Gnao1/Pgf/Fyb2/Rasgrp3/Csf1/Rapgef4/Adcy1/Itgam/Efna5/Pik3cb/Rassf5/Rap1a/Igf1r/Efna3
ko00627	Aminobenzoate degradation	2/821	8497-04-01	0.0490207	Ehhadh/Acyp1
ko00604	Glycosphingolipid biosynthesis - ganglio series	4/821	15/8497	0.0497858	St3gal2/St3gal5/Glb1/B4galnt1
ko00720	Carbon fixation pathways in prokaryotes	4/821	15/8497	0.0497858	E130215H24Rik/Mmut/Gm32856/Acly
ko04927	Cortisol synthesis and secretion	11/821	66/8497	0.0500922	Gna11/Paqr4/Plcb4/Creb3l2/Nr4a1/Pde8b/Cacna1h/Cacna1c/Adcy1/Gm35596/Star
ko00330	Arginine and proline metabolism	9/821	51/8497	0.0532953	Prodh/Arg2/Maob/Gm8234/Srm/Agmat/Nos1/Pycr1/Nos3
ko04062	Chemokine signaling pathway	22/821	159/8497	0.0534284	Gna11/Gm12992/Grk3/Pik3cg/Ccl8/Plcb4/Ccl20/Ccl9/9130221H12Rik/Ikbkb/Pik3r5/Gm21586/Ccl22/Cxcl11/Cxcl10/Adcy1/Pik3r6/Ikbkg/Wasl/Pik3cb/Rap1a/Ccl28
ko05135	Yersinia infection	20/821	142/8497	0.054438	Tab1/Git2/Gna11/Wipf1/Gm12992/Elmo2/Map3k7/Pkn3/Igha/Il18/Ikbkb/Isoc1/Dock1/Fyb2/Casp1/Ikbkg/Wasl/Pik3cb/Actr3/Syngr4
ko00500	Starch and sucrose metabolism	5/821	22/8497	0.0547439	Gaa/Sis/Hk1/G6pc3/Mgam
ko05012	Parkinson disease	31/821	240/8497	0.056866	Maob/Uqcrc1/Ndufab1/Psma2/Cox6a1/Ndufs5-ps/Slc39a5/Psmd6/Prkn/Slc39a3/COX2/Ndufs6b/Ndufb9/Kif5a/Atp5d/Ube2g1/Mapt/Gm54042/Ndufv3/Slc39a11/Cox8b/Gm11517/Uqcrb/Cox4i1/Ctnnal1/Gm34303/Gm35596/Cox5b/Cox8a/COX1/Psma5
