# Supplementary material for: Deciphering Microbiome, Transcriptome, and Metabolic Interactions in the Presence of Probiotic Lactobacillus acidophilus against Salmonella Typhimurium in a Murine Model
Source: Antibiotics (Basel). 2024 Apr 11;13(4):352. doi: 10.3390/antibiotics13040352 (PMC11047355; doi:10.3390/antibiotics13040352)
Supplement: Supplementary file 1 [file antibiotics-13-00352-s001.zip › Table Supplementary S8.xlsx]

## Sheet: LAST VS CPG..Significant
Table S8. Showing Significantly up and downregulated Metabolites between LAST versus CPG
id	Name	Mean.LAST	Mean.CPG	VIP	P.value	FDR	Fold.Change	Log2.Fold.Change
6	D-Proline	0.912021056609408	0.326633522579458	1.71979824281578	0.00212166064725951	0.297601716643645	2.79218449290534	1.48139427041789
8	L-Allothreonine	0.390707549220776	0.0940670105162291	1.6864189911892	0.00843538127069016	0.399163484610958	4.15350234983143	2.0543283706266
11	L-Valine	2.49938916659868	0.68928783127435	1.6773862994171	0.0126415137002475	0.45296788342756	3.62604568541103	1.85839710205414
14	D-Phenylalanine	5.75352966914612	1.22594197600628	1.63041674129379	0.0335346394762128	0.56250667657166	4.69315006888766	2.23055659294203
15	2-Hydroxy-3-methylbutyric acid	1.12372743014238	0.391684420082006	1.63055467630015	0.00521264407463202	0.355066701030347	2.86896126710149	1.5205284908888
20	Ursodeoxycholic acid	0.894314393149977	0.327795246677493	1.48826345785366	0.043193368473023	0.599175464380548	2.72827138957833	1.44798716083008
23	N-Acetyl-L-alanine	0.0743916816365367	0.0201187176054913	1.58245246932347	0.0163206492985668	0.496614042942105	3.6976353610248	1.88660296168668
26	(R)-Leucic acid	4.50192511571418	0.913295265107469	1.63778688090042	0.00295994302143166	0.318376889511738	4.92932054693663	2.30138880053425
29	L-Leucine	4.66517000084039	1.05793245545517	1.65986292376517	0.0223967695747769	0.525729884998131	4.40970496441875	2.1406821341028
32	Ursocholic acid	8.33954926263581	2.87791505706884	1.62829902316908	0.00250576881810933	0.318376889511738	2.89777463798034	1.53494539982563
46	L-Alanine	0.997772419956338	0.438151781875602	1.48040437744412	0.0133103766645755	0.459229940240795	2.27723008607921	1.18728006542072
47	Taurine	2.82381646717723	0.16506379635598	1.6663811253659	0.0314885475986003	0.552344182731403	17.1074247019457	4.09655069227356
48	Cholic acid	6.50479538079489	0.220858188433723	1.7393334737677	0.00706900583298383	0.383192790767751	29.4523622915023	4.88031144811309
51	3-​Oxocholic acid	2.6574735604708	0.183300966456281	1.62075230698224	0.00123183938774334	0.264832955056207	14.4978698795057	3.85776904064319
53	N-Acetyl-L-leucine	0.135088805830688	0.0358530100098143	1.56112658869366	0.0391736418088022	0.585162633876419	3.76785117326855	1.91374198091996
58	2-Hydroxybutyric acid	0.326923192183182	0.103570229427873	1.51085555892127	0.0181343577691038	0.507547717915738	3.15653633277749	1.65834235709369
62	3-Indoleacrylic Acid	0.593015901592678	0.0754576442521728	1.66989900064696	0.0251993376299177	0.52987711411209	7.85892413511971	2.97433182505834
63	L-Threonine	0.0139021682618974	0.00526241774074733	1.44543366446395	0.0420070077004153	0.595030298731745	2.64178348181137	1.40151222944719
69	2-Hydroxyethanesulfonic acid	1.58360455937594	0.171144100149125	1.66604637098936	0.00485409029273727	0.351143060044428	9.25304791690789	3.20992866187934
81	phenethanolamine	0.618204981861379	0.133735995667013	1.61987207044148	0.0368915292327799	0.576808441914088	4.62257733064355	2.20869745453543
92	Phytosphingosine	5.78422920634363	1.43563986431756	1.54497420380069	0.0297130080039204	0.545904234988099	4.02902521036723	2.01043083272851
119	(S)-2-acetamido-4-amino-4-oxobutanoic acid	0.0599213920214151	0.0245153759141615	1.3970674847853	0.0375816331862986	0.577503163089241	2.44423712820986	1.28938425532736
122	DL-Methionine sulfoxide	0.113698437121834	0.0517514560673237	1.53787275413443	0.028213546507507	0.543618155757883	2.19700943242877	1.13554106370247
152	2-Azetidinecarboxylic acid	0.0411485949712773	0.0116172979633459	1.35443670837648	0.0156557966326438	0.491850900335818	3.54201081018208	1.82456861518759
155	DL-3-Phenyllactic acid	1.55929385106421	0.471796387987992	1.49583858754293	0.0130128024003643	0.459229940240795	3.30501438918158	1.72465655286934
158	PC(20:1(11Z)/14:0)	0.450502761116917	0.183856182906121	1.53884863611856	0.0203706394507062	0.507985905744258	2.45029976145512	1.29295825449746
163	Amifampridine	0.0724111352633482	0.0131914874481601	1.48221671401042	0.00481747318211927	0.351143060044428	5.489232017838	2.45660432016691
165	Choline	10.3447731443972	4.71454804053216	1.44963885061137	0.0356982958050721	0.571073433031905	2.19422372101431	1.13371062908801
168	PC(P-18:0/22:4(7Z,10Z,13Z,16Z))	0.00260154830244297	0.000508476352544538	1.17806298974802	0.0456197546558764	0.609143466466976	5.11636045496353	2.35511790774371
169	Syringaldehyde	0.38309253182515	0.134082965854223	1.48853133306365	0.0242043577950843	0.527367929949365	2.85713050412125	1.51456693524122
180	PC(P-18:1(9Z)/16:1(9Z))	0.00739324787423599	0.0042783926957667	1.53715497126878	0.0324643428771516	0.558211860126131	1.72804330971098	0.789139376021205
186	L-Tryptophan	0.500511348792052	0.0439836874798596	1.57417502453858	0.0311482683123887	0.552344182731403	11.3794767439915	3.5083623154313
199	N-[(Ethoxycarbonyl)methyl)-p-menthane-3-carboxamide	0.0742240307635047	0.0140403395961378	1.67644376325368	0.0170031814321597	0.50275216666504	5.28648400954076	2.40230851847124
211	PC(P-18:0/16:0)	0.0614759807987458	0.0337414024822828	1.45422874237237	0.047556363722669	0.615290546162136	1.82197467431966	0.865502905634273
225	Serylalanine	0.00884318849125188	0.0043969789555906	1.43887319310054	0.0446815796969383	0.608198259969448	2.01119645569558	1.00805401243126
258	Sphingosine	5.09001871591525	1.79439123470037	1.69517888279219	0.00302449182485606	0.318376889511738	2.83662705071404	1.50417648284549
282	Glycocholic acid	0.0350972347494102	0.000194172481695894	1.65361913246792	0.0432670360544116	0.599175464380548	180.752877250538	7.49787480216298
284	Ganoderic acid D	0.28713313724983	0.110260151664825	1.41798280425746	0.0211597640762607	0.509835104166594	2.6041424115094	1.38080834664503
302	2-Phenylacetamide	0.0479093414376291	0.0112167267387876	1.55519921913114	0.0492020157463536	0.617764164538601	4.27124084889737	2.09465525169416
315	Creatinine	1.41346487768848	0.565106027300646	1.35015190957147	0.0220835956121063	0.522645096153181	2.50123836838232	1.32264255311906
320	Dehydrophytosphingosine	1.17564972321921	0.280871361400925	1.71055492131046	0.0086573731575312	0.399261556460509	4.18572302051491	2.06547684810809
322	7-Ketodeoxycholic acid	0.257380751064278	0.0257128052357597	1.65500269468906	0.00346573354178212	0.319647658338795	10.0098277377503	3.32334524148566
328	Racemethionine	1.23926339246037	0.332034264450666	1.55114173379649	0.0483015441253077	0.617391903164145	3.73233586151316	1.9000788157549
332	Alpha-dimorphecolic acid	0.0642217590295644	0.0123929188519521	1.64449552755311	0.00142427909298638	0.271121974201849	5.18213342609343	2.37354616153985
349	2-Hydroxy-6,7-dimethoxybenzoxazole	0.0567042160317991	0.00618604694077355	1.61015352567381	0.000105517545213077	0.134851422782313	9.16647037675216	3.19636631940151
357	3-Oxo-4,6-choladien-24-oic acid	0.0505232863410533	0.0055446694290844	1.69961699998074	0.00190089554300323	0.283949357605496	9.11204662193834	3.18777512863812
376	PC(16:0/16:0)	0.037722566523789	0.0546920991856537	1.65715674978427	0.00861748415942337	0.399261556460509	0.68972606803295	-0.535904600763213
384	3-Hydroxy-4-aminopyridine	0.584949843476967	0.238887784932352	1.51509848134767	0.03705976687311	0.576808441914088	2.44863856744544	1.29197983987344
412	Nebicapone	0.147807109739359	0.0304554443789492	1.67485963709494	0.0189719261982265	0.507547717915738	4.85322453024273	2.27894360668659
413	Aminoacetone	0.0445500355828822	0.0197759450754706	1.63762257940539	0.0133812587601941	0.459229940240795	2.25273863842495	1.17167994254768
414	Beta-Alanine	1.5134331015119	0.552105395047632	1.64115908655232	0.00327767052078016	0.318376889511738	2.74120324685712	1.4548093009335
421	Afalanine	0.046930297652417	0.0084181272217563	1.24589350565153	0.013331380707634	0.459229940240795	5.57490952751671	2.47894839242988
448	2-(Methylthio)propane	0.029737544924734	0.0128936406555855	1.45850650764503	0.0218241873013945	0.519077899870521	2.30637301900079	1.20562586474226
454	Imidazol-1-yl-acetic acid	0.0140447090284224	0.00611582184162534	1.5069054592462	0.0233172795288692	0.526824107921759	2.29645489880554	1.19940845004763
471	PC(18:1(11Z)/18:1(11Z))	4.15106490426899	0.999428893675956	1.61685329787138	0.0282084186900448	0.543618155757883	4.15343695838244	2.05430565710585
472	Glycine	0.0269829523507991	0.00899550484219421	1.65257009036575	0.0159826441620492	0.49234453217445	2.99960400490623	1.5847720547656
475	2-Acetylthiazole	0.0932706609976826	0.00671700809271423	1.63327559499449	0.00784848979238016	0.399163484610958	13.8857449195053	3.79553266944052
490	cis-11-Eicosenoic acid	0.247213749048512	0.622582003956235	1.57926452208992	0.036545572218995	0.575818043373809	0.397078212151294	-1.33250489313765
498	2-Oxo-4-methylthiobutanoic acid	0.0826928549336635	0.0369885421193565	1.71709520051377	0.000358405341692794	0.225642674478749	2.23563433959701	1.16068424024298
500	3a,12b-Dihydroxy-5b-cholanoic acid	0.117948161699365	0.0274755435786647	1.54739933755935	0.0477910075410991	0.616938460985097	4.29284179079733	2.10193300440977
506	4-Acetylbutyrate	2.84349202198845	1.51173586725191	1.45383047712696	0.0238041731826702	0.526824107921759	1.88094500076753	0.911457664767544
507	Piperidine	0.0273085263221912	0.0155395854322266	1.48612543281114	0.0480016515208611	0.617391903164145	1.75735230783942	0.81340344679365
526	2-Methylcyclopentane-1,3-dione	0.0341401983056545	0.0131218423406698	1.64211340262228	0.00680969335247137	0.383192790767751	2.601783912602	1.37950114608221
532	L-Urobilin	0.324147251464016	0.155270890097824	1.45284214557537	0.018349376120462	0.507547717915738	2.08762409528145	1.06186195870091
580	PC(20:4(8Z,11Z,14Z,17Z)/18:1(11Z))	0.0403370072293628	0.00892267222711247	1.47636976831688	0.0468091823383637	0.613569835730161	4.52073170488036	2.17655629953608
598	2,4,6-Octatriynoic acid	0.15370307307915	0.0402817467941281	1.56640731111209	0.0458063452370409	0.609143466466976	3.81570029385011	1.93194785856652
608	Thiomorpholine 3-carboxylate	0.160845201592357	0.0175753240218879	1.613730905427	0.0473207653361033	0.615290546162136	9.15176308510975	3.19404970504885
626	Argpyrimidine	0.0613434271924346	0.0154097752421839	1.66571798133524	0.00120926489725204	0.264832955056207	3.98081258346381	1.99306295098915
652	PA(14:1(9Z)/18:4(6Z,9Z,12Z,15Z))	0.00838114644699097	0.000258316718092072	1.72323863105649	0.00456100328025427	0.351143060044428	32.4452343189173	5.0199346800645
682	C-021	0.174963502733814	0.0135705470828768	1.60075632938243	0.0192393327257226	0.507547717915738	12.8928849857926	3.68850322041683
683	Tryptophyl-Tryptophan	0.0180039597853181	0.00619430548676448	1.51778021940932	0.0328668556836278	0.558396712072507	2.90653404546928	1.53929980756929
688	Ganoderic acid A	0.727668594887259	0.151564116252747	1.54239249919527	0.0419137087604853	0.594768423144588	4.80106118043012	2.26335332052905
715	N-Formyl-L-methionine	0.161446067623659	0.0583369626829396	1.6180492190865	0.00340427132891118	0.319647658338795	2.76747468840836	1.46857012203854
787	LysoPC(22:0)	0.0143373564476763	0.00578317351172349	1.42548727645927	0.0384397314309093	0.582115825063994	2.47915031748779	1.30984574852007
790	LysoPC(18:1(9Z))	0.888351641845287	0.108215809338712	1.62925788896901	0.00412425555060477	0.341274729086735	8.2090745083722	3.03721958163227
804	Phenylglyoxylic acid	0.365724973435877	0.0734172741101715	1.57646165696502	0.00616326436022007	0.375869357126756	4.98145671939634	2.31656768898715
815	trans-Cinnamic acid	0.116867804179177	0.0148757858213928	1.63729550854337	0.0471661779796607	0.615085463857208	7.85624407223653	2.9738397509784
839	MOPS	0.205880625179895	0.0587514020716896	1.45280810536143	0.0280350675685625	0.542860853827619	3.50426743737409	1.80911288220225
894		3.19879164036929	0.503931904448213	1.62640032504797	0.0469432668616364	0.613569835730161	6.3476664448778	2.66622631989271
903		0.58150209534793	0.018607502270316	1.74101170556413	0.00936347124628879	0.402839999106982	31.2509485099235	4.96582807313556
905		0.462668669785937	0.161647642906815	1.71177927365295	0.000670072860416855	0.232896562145433	2.86220486402423	1.51712693752029
907		1.71729597120296	0.357652751130187	1.66341009705457	0.0203813047817832	0.507985905744258	4.80157349769095	2.26350726110829
915		0.332629057759555	0.123892891164931	1.63006063280617	0.017377677290256	0.504036231444459	2.68481149024722	1.42482079523752
917		2.12269923028436	0.225682602717777	1.68293527687972	0.00995149745452682	0.412208354200045	9.40568393275249	3.23353285289418
920		0.115288879360726	0.00110117724625756	1.66570266994897	0.0326633853600581	0.558211860126131	104.696023962123	6.71006284389591
924		2.20710859192988	0.184701118960606	1.69777865256639	0.008820932287578	0.401483066452213	11.9496222023464	3.57889310176139
928		3.57518290763256	0.907588393137219	1.63734041312671	0.00859955608025433	0.399261556460509	3.93921179982744	1.97790698850462
930		2.13662000103089	0.356957745490994	1.65550769178281	0.0267414917107349	0.532146431932306	5.98563843485728	2.58150513483457
932		0.973847526146559	0.124642862213366	1.67079343728871	0.0248134333686805	0.527566476585498	7.81310304379494	2.96589564142578
935		0.543041499279821	0.22512436411876	1.43654143894353	0.0363567202999297	0.574418854961509	2.41218448925124	1.27034025199309
943		0.333327207616416	0.153949673857751	1.57113208412284	0.0174621229337014	0.504036231444459	2.16516994978768	1.11448027026055
972		0.0713693232622393	0.00428584705379309	1.74385759867892	0.0032466007296384	0.318376889511738	16.6523262184719	4.05765182109894
975		0.173389933819823	0.0671032659319505	1.51634288071193	0.00698549111673044	0.383192790767751	2.58392689851575	1.36956525554244
979		0.568456831620218	0.120075298109841	1.65783016980529	0.0327830852523932	0.558211860126131	4.73416964661802	2.2431114052591
983		1.21922252173333	0.26788456309362	1.66172309488643	0.00165254373699638	0.271536543756176	4.55129816982862	2.18627810488267
1008		0.00145100223520806	0.00022439883371984	1.72252502266196	0.000950475854153384	0.248463028965278	6.46617547495643	2.69291265893545
1018		0.00459915558623325	0.00209932491173396	1.40224145895081	0.0338643000734824	0.56390592444567	2.1907783595225	1.13144353462836
1035		0.00379217802390368	0.00819202850400397	1.489643561592	0.0200331563088021	0.507985905744258	0.462910745739008	-1.11119404199089
1074		0.00316600568742681	0.00128401822254443	1.38066409006574	0.0245006250745963	0.527566476585498	2.46570152341997	1.30199817007985
1106		0.0515641940255794	0.00596075370382848	1.56889376321026	0.0203497901293752	0.507985905744258	8.65061644678603	3.11280294350461
1111		0.00422046993061731	0.000253924076827882	1.53012907453149	0.0083958515055958	0.399163484610958	16.6209915315674	4.05493454408386
1116		0.00173641523320701	0.0058646630340803	1.36244915284392	0.0322021269916327	0.556017997888663	0.296080989328198	-1.75593623349183
1125		0.00768574782229435	0.00174605558269033	1.420090916438	0.0245832388483056	0.527566476585498	4.4017772964891	2.13808615536614
1126		0.0169737847260723	0.00422694111872587	1.69997977965954	0.0122737954222405	0.449648865753849	4.01561891905149	2.00562236448766
1130		0.0419247448428407	1.45372681120067e-05	1.74305878836231	0.0373461459901796	0.577503163089241	2883.9493445274	11.4938301090741
1150		0.000991008036456546	0.00904056080193195	1.28464877999867	0.0460887444249018	0.610728961261775	0.109617982575237	-3.18944360640621
1161		0.0394167874346351	0.0820438367510481	1.35124674132363	0.048537918163985	0.617391903164145	0.480435691400446	-1.05758476254964
1165		0.00779723680847904	0.000701870177248034	1.6698607599188	0.0189597381346117	0.507547717915738	11.109229400587	3.47368684154154
1171		1.12955815037228	0.275288678685629	1.5415144310703	0.030872850177391	0.552344182731403	4.10317691147118	2.03674135842247
1187		0.0963759177740275	0.0286762695423499	1.66801503753253	0.00764075040891041	0.399163484610958	3.36082479737112	1.74881533569795
1204		3.2119203868909	1.12953282789154	1.4752794314328	0.047500538776632	0.615290546162136	2.84358303502032	1.5077099328159
1212		0.0825890076222214	0.00362804418621315	1.7008718175311	0.0482320318422253	0.617391903164145	22.7640578182774	4.50868584376663
1215		0.0677795244493087	0.00585514136113898	1.29460975227577	0.00105015765748328	0.264832955056207	11.5760696913599	3.5330736073462
1234		0.0421042992902922	0.0106948198811532	1.5276047609161	0.0139301079426885	0.466200118312431	3.9368871807266	1.97705536981512
1270		0.0249801096744561	0.00645568567461116	1.63635375546252	0.0285460169287152	0.544504621416389	3.86947427950179	1.95213757001918
1278		0.223559314643738	0.0726748456961593	1.60002053931777	0.0209756636034993	0.50912177134196	3.0761580915961	1.62112964897622
1312		0.0143774454301251	0.00565325518136078	1.55263919860451	0.0152915309951034	0.48780449719156	2.54321536334121	1.34665363680921
1315		0.0492726584595941	0.0100981054265546	1.64724589730214	0.0233804682661861	0.526824107921759	4.87939632022693	2.28670266834385
1388		0.000979436612875746	6.66283504293549e-05	1.53680920484412	0.0263562019883427	0.530972149339522	14.6999979222693	3.87774404603526
1443		0.10506596963205	0.0106337512647948	1.70493638787919	0.00526615674603147	0.355066701030347	9.88042385191875	3.30457293208781
1479		0.034612489073009	0.00602080918152739	1.59289770118786	0.0144211612934291	0.474653830983173	5.74881017309177	2.52326339344744
1484		0.0247064032393039	0.00568285118499986	1.42422716010197	0.0290935554554153	0.545387327386558	4.34753655075775	2.12019815665786
1497		0.0097145855136246	0.000195644703109871	1.63132235370277	0.00937129686751346	0.402839999106982	49.654221960556	5.63384448620796
1521		0.102344682877153	0.0120190183324697	1.63116873790921	0.0411373870606608	0.59039483022588	8.51522811980962	3.09004517968769
1535		0.00608943603185827	0.0186318239377103	1.62654594276505	0.0155356104769855	0.490299831759611	0.32682983975248	-1.6133883865028
1564		13.7896899411663	0.0953550906593317	1.71602607565764	0.0252469329902113	0.529909166520821	144.614092921706	7.17606434232336
1604		0.00584312649211225	0.0121743771660975	1.52101481046698	0.0438340741502581	0.602365018968062	0.479952806816586	-1.05903554055136
1611		0.0993398560515794	0.0145527689266618	1.61000509530876	0.0139430395322097	0.466200118312431	6.82618246412068	2.7710789782463
1690		0.152763024901632	0.0311309236022056	1.58474838955822	0.00359246111007445	0.319647658338795	4.9071150876747	2.29487510765446
1731		0.00993460067396993	0.0057245517771511	1.67981146591473	0.00794285296953107	0.399163484610958	1.73543729897295	0.795299241804484
1737		0.096849307721396	0.00421275177073546	1.71714655635781	0.000269769680248632	0.212520439853905	22.9895595544402	4.52290692133006
1770		4.12043616970557	0.0304908202258733	1.72684846320869	0.0237722379275458	0.526824107921759	135.136940862258	7.07827829163208
1796		0.00336567648745308	0.012956133345838	1.66386192006271	0.013534946073868	0.459229940240795	0.259774764400235	-1.94466680668415
1814		0.0852534504333873	0.13226191319375	1.45296432165141	0.0283685945545822	0.543618155757883	0.644580502238011	-0.633567545568347
1819		0.00300185115955118	0.00171361863227509	1.62797978065537	0.00664384243418366	0.383192790767751	1.75176150808175	0.808806373952606
1837		0.113094377080111	0.017112412226238	1.37315075562658	0.0136329251339845	0.46119383791497	6.60890911140552	2.72441215532628
1868		0.00155527274385166	0.00179608000797113	1.40192194811387	0.048763829417943	0.617668976770058	0.865926204261087	-0.207684013680161
1882		0.000950919116869047	0.000767684202935033	1.361005446321	0.0489114477906248	0.617764164538601	1.23868527349327	0.308809672507634
1890		0.00430238099464243	0.0508028448719343	1.60172095039105	0.00939374107197049	0.402839999106982	0.0846877966280832	-3.56170209521802
1912		0.0330359909351706	0.00333930303876637	1.6703438227912	0.0152200405352401	0.487634836312901	9.89307964915186	3.30641969216236
1920		0.011374899844733	0.00883188996191741	1.61906350449015	0.00775097684762051	0.399163484610958	1.28793495998942	0.365059739982076
1951		0.0917110177473787	0.0114211060846568	1.63150340731616	0.0373247008480074	0.577503163089241	8.02995936361923	3.00539268686421
1962		0.00478267767225708	0.0211716955596792	1.12855452345361	0.0444695439194752	0.60746875791188	0.225899605384725	-2.14624634434227
2017		0.019296101480653	0.00859883180593922	1.46043545032377	0.0195627093175587	0.507985905744258	2.24403755255744	1.16609681874309
2049		0.00290760138567824	0.0155636958651285	1.67211037537458	0.00318793818590027	0.318376889511738	0.186819468259651	-2.42028329027792
2089		0.00243997629707672	0.0191335417263656	1.60389768536277	0.00153365752899577	0.271536543756176	0.127523504637643	-2.97116491134133
2117		0.000545258782608175	0.00555212408128908	1.39469619653476	0.0110372971713402	0.42744441772645	0.0982072400805528	-3.34802680226861
2146		0.0286280390282058	0.00669924861367732	1.60800942305179	0.0150005197007736	0.483294054897193	4.27332088702578	2.09535765419174
2203		0.00174568909095922	0.00281238167734103	1.43998216408289	0.0351849848472917	0.56959204830121	0.620715568240257	-0.687995764110303
2226		0.0139772723654734	0.00320143800851154	1.57043734740147	0.0406855372711565	0.589820945049004	4.36593566026036	2.12629086983689
2240		0.00212484072591375	0.0116900776671782	1.17082963102173	0.0335489115047956	0.56250667657166	0.181764466106123	-2.45985790626357
2246		0.0396886293057914	0.100099206592555	1.4509202145729	0.0225874146243768	0.526824107921759	0.396492945916548	-1.33463289599907
2254		0.00740089335666911	0.00361224723011229	1.61383433243501	0.00237316772948982	0.318376889511738	2.04883356127289	1.03480279055749
2276		0.0113092439237261	0.00378546965200361	1.68043799949564	0.00232051029300991	0.317744159407143	2.98754050709143	1.57895827425949
2278		0.173395504633079	0.0571881712106198	1.68636533209773	0.00370539702604951	0.320447192433244	3.03201695319957	1.60027782020708
2281		0.00842299334176057	0.0217741050812853	1.43166627695647	0.0424534265984431	0.596900509085814	0.38683533997455	-1.37020849428911
2282		0.916472932631485	0.31120346614859	1.69976753235837	0.00401309178498967	0.336923954094535	2.94493163579964	1.55823414344874
2283		0.994569587996178	0.356689880407959	1.68290042115778	0.00496127142003101	0.354438160703085	2.78833138427884	1.47940203109337
2286		0.034677059927182	0.0113381939319845	1.60766633775449	0.0264055007322384	0.530972149339522	3.05842889398456	1.61279073496455
2291		0.0476023521485539	0.0161548956718561	1.56628085508254	0.031582273948843	0.552344182731403	2.94662083342843	1.55906142865808
2309		0.0015753822374053	0.0034150086003519	1.72191698361108	0.00172503835808798	0.277807063967268	0.461311352844898	-1.11618729740794
2321		0.00567204411776145	0.0120275768898221	1.54542832201083	0.00789832721530265	0.399163484610958	0.471586602165995	-1.08440536313297
2325		1.50852404692309e-05	0.00242503616075275	1.75653834150472	0.00526543880658749	0.355066701030347	0.00622062495948444	-7.32872475564766
2340		0.0308485066092867	0.0524899448368401	1.57241702979982	0.0368523703609049	0.576808441914088	0.587703163056778	-0.766840431860949
2343		0.0218677627132964	0.0357808375262861	1.50576845059247	0.0490481251606345	0.617764164538601	0.611158492230135	-0.710381531041222
2391		0.0230732383896194	0.0148414315868307	1.53383058517283	0.035388091189802	0.570075384965129	1.55465045636791	0.636590244953044
2399		0.00156361233832641	0.000277105120039367	1.31377229028585	0.024094760382561	0.527367929949365	5.64266852270457	2.49637760127525
2409		0.00672434826771448	0.000425206882979758	1.50198206036167	0.0196399735383446	0.507985905744258	15.8142977850963	3.98315759102397
2415		0.0117912993569449	0.0545013331858624	1.5463472883278	0.00114030302308129	0.264832955056207	0.216348824289008	-2.20856881418777
2417		0.00584553009426683	0.00165635162415474	1.57233187936592	0.0451695726784973	0.609143466466976	3.52916011855266	1.81932488690468
2420		0.0151014574522198	0.00619664021801057	1.31736376577476	0.0437991180127486	0.602365018968062	2.43703957643488	1.28512967997497
2428		0.0182784798919885	0.00606385523901292	1.44967808352795	0.0254372018477519	0.530972149339522	3.01433315465557	1.59183887745578
2440		0.0242289498731946	0.00783608202628139	1.32115076985702	0.0370143940783859	0.576808441914088	3.09197246684417	1.62852747252142
2456		0.00106666638528771	0.00628965276106929	1.71063552834349	0.00076841010136536	0.232896562145433	0.169590663556181	-2.55987134722659
2502		0.00664305477669198	0.00212740985612264	1.40527268060921	0.0161926603552416	0.494026470572915	3.12260223744541	1.64274880803527
2503		0.197947615016161	0.0794463206499695	1.55085920835738	0.0125435926164187	0.45296788342756	2.49158945809829	1.31706637351486
2504		0.0165937582501333	0.00607953639945097	1.55727613541072	0.0126411746970795	0.45296788342756	2.72944467470117	1.44860745424015
2577		0.00493557605671268	0.00200912598425751	1.56995695630035	0.0111830819798443	0.430193340910265	2.45657867917957	1.29665044639381
2640		0.00431287138810992	0.00135976337685368	1.29433406922512	0.0352382259770639	0.56959204830121	3.17178081240087	1.66529307627886
2654		0.040718706332374	0.0018019601141149	1.68901503426958	0.0418730165914809	0.594768423144588	22.5968965758016	4.49805274353937
2663		0.0596278719723652	0.0231366419180373	1.55678673096567	0.0407197194631179	0.589820945049004	2.57720511833999	1.36580736507312
2705		0.0315221040756387	0.00305513693922469	1.56296440514412	0.0187597143285232	0.507547717915738	10.3177385180116	3.36705488479762
2707		0.0180089941337518	0.000982490459460072	1.65307150969665	0.0267056067051624	0.532146431932306	18.3299430140508	4.19613039557836
2742		0.000493886442737521	0.0110740907342975	1.48040628563363	0.0479838709159038	0.617391903164145	0.0445983742220846	-4.4868650703127
2744		0.0296229812865787	0.0103994632666934	1.63697875414997	0.00632730003340939	0.379044817626432	2.84851059395084	1.51020777177357
2793		0.214072247040694	0.0547176706597623	1.70402061665352	0.0118990034200476	0.442920185557888	3.91230555795783	1.96801905171534
2807		0.00303249824758706	0.0229886794149252	1.6715326043952	0.0468623893798681	0.613569835730161	0.131912677229221	-2.92234487603811
2831		0.00827262284726815	0.0382236047010272	1.56087403541005	0.0230450755590899	0.526824107921759	0.216427072014112	-2.20804712336736
2843		0.0040605805598991	0.000738623327329768	1.5637482796757	0.00963663249037545	0.407502010677568	5.49749839959522	2.45877527909
2849		0.0732244733026315	0.0152101506124206	1.60742935289221	0.0421097738514305	0.595752298695146	4.81418463028477	2.26729147211744
2853		0.0893538581707071	0.0666968715472702	1.61574549956421	0.00800820237465432	0.399163484610958	1.33970088997921	0.421910931494597
2860		0.0134572063765241	0.00317240464930232	1.73753201458885	6.71817306264898e-05	0.134448827656852	4.24195771478384	2.08473023968607
2879		0.00143786356235453	0.00580031127241476	1.4841914219335	0.00484346074008195	0.351143060044428	0.247894206849338	-2.01220353805485
2898		0.0217497968801624	0.00688926628940363	1.53974886172024	0.00940001612754842	0.402839999106982	3.1570556234146	1.65857967937673
2900		0.110339061753158	0.0289257093845463	1.52896587543413	0.0236933264064363	0.526824107921759	3.81456718264988	1.93151937190432
2909		0.00979693258628842	0.00138476661613625	1.71313606232301	0.0191826223792628	0.507547717915738	7.07478969533773	2.82268726313847
2930		0.00516889168134311	0.0103484403481604	1.63394772736202	0.00826553352938881	0.399163484610958	0.499485092191883	-1.0014864754118
2963		0.00877515481786676	0.00269851905724152	1.59680845589228	0.0283199731518079	0.543618155757883	3.25184096599892	1.70125670293108
2972		0.139398682890231	0.00811334372664146	1.72350358351787	0.0213629530912202	0.511796108080866	17.1814097352357	4.10277650939597
3013		0.0586602765612588	0.0109431180994786	1.40066564456427	0.0273624588893812	0.535920672060347	5.36047185345221	2.42235999894306
3050		0.0504362959466858	0.0100985068949333	1.63219801559228	0.0333683025070851	0.561114350053351	4.99443100563623	2.3203203272459
3058		0.382177930297396	0.0896871303464649	1.61424483112413	0.0294551153553768	0.545387327386558	4.26123490428368	2.09127158352834
3059		0.199619131771096	0.0452013530977348	1.61283371821145	0.0321702385887161	0.556017997888663	4.41622026976664	2.14281213184769
3065		1.3793772982807	0.30212107407301	1.70948691778016	0.00353773958916528	0.319647658338795	4.56564409653648	2.19081840223145
3066		7.44044316935693	1.81228681250183	1.616900167296	0.0271126008462998	0.534014195697268	4.10555499164369	2.03757725965745
3067		1.16048971215766	0.276425883605538	1.623002939803	0.0266088662526217	0.532146431932306	4.1981948181585	2.06976911676576
3068		0.0327611546409937	0.000103990593338579	1.67258372727097	0.000767184796950218	0.232896562145433	315.039597229028	8.29938936167516
3069		0.0243867352700131	0.00411213830715775	1.66379493323737	0.0134534262366694	0.459229940240795	5.93042681165772	2.56813593898771
3071		0.0718219975568121	0.0106791021296343	1.64433972618116	0.028386631337304	0.543618155757883	6.72547155041318	2.74963542448601
3074		0.443782893273317	0.0961950985468462	1.62740090521034	0.0304072422869986	0.550039160162282	4.61336284256935	2.20581876532559
3077		0.236949562954595	0.0528945901464898	1.61661487334304	0.0332713064791887	0.561114350053351	4.47965590239704	2.16338791822684
3083		0.0163324028076739	0.00253828343043076	1.60169986813607	0.0468470912170432	0.613569835730161	6.43442832737642	2.6858119765896
3088		0.0452770912434578	0.0104239146598143	1.4688929362069	0.0403543788828858	0.589689146727554	4.34357846558429	2.11888409966167
3105		0.0323602422110454	0.0116000682526822	1.49095146935601	0.0479301497596585	0.617391903164145	2.78965963873213	1.48008911220954
3145		0.340024626484369	0.0562216749104532	1.59461999264126	0.00602396908388544	0.374127364493902	6.0479277258449	2.59644089911782
3147		0.0375158141482452	0.0131524139188658	1.40901759896737	0.0416122482397431	0.594564073606863	2.85239001598273	1.51217125936046
3169		0.0097264445926938	0.00286204751581382	1.38338177858436	0.0390443900602769	0.584750748012115	3.39842177285729	1.76486491427866
3186		0.00656039495619678	0.0119997780111394	1.46716516799368	0.0137488648771188	0.463752034652847	0.54670969330489	-0.87115313976523
3189		0.00292750540754892	0.00579355506327991	1.49357397350707	0.0347351089755869	0.565747253804491	0.505303803204309	-0.984777056345811
3199		0.0116804390179441	0.00177436969018357	1.67747593983835	0.00942131453310539	0.402839999106982	6.58286662726734	2.71871596820616
3206		0.00313283149355206	0.00439035141950959	1.37058118250458	0.0426735987803396	0.596900509085814	0.71357192037762	-0.486869249709028
3238		0.00644514784746439	0.00951575795110503	1.44964987632032	0.0492762040239173	0.617764164538601	0.677313134758324	-0.562105121473039
3247		0.0889888586397921	0.0205754131259793	1.61906017326209	0.0459161350571091	0.609143466466976	4.32500956821282	2.11270332442518
3267		0.00124022003118477	0.00273509675641533	1.62859646760474	0.0168991524961013	0.501806914022039	0.453446492624349	-1.14099577429867
3272		0.000908405100061847	0.00275160586945583	1.62476502133384	0.0341222538797893	0.56471102751847	0.330136343342477	-1.59886612726352
3288		0.570785415037092	0.154470842980831	1.58436871367047	0.0434750654664474	0.601021878599853	3.69510131506127	1.8856139218092
3290		0.00335206323535944	0.0175790272993259	1.5623772767712	0.00544778531682759	0.355066701030347	0.190685364911402	-2.39073397373261
3311		0.0563116118965694	0.0206563790437008	1.31367265767894	0.0241029971306303	0.527367929949365	2.726112440977	1.44684506863412
3313		1.05203241194746	0.367698166983013	1.47140588668556	0.048299915705721	0.617391903164145	2.86113042275803	1.51658526346941
3320		0.0537919535345392	0.014393716058218	1.65606996483978	0.00159372388512185	0.271536543756176	3.73718317889334	1.9019512794811
3328		0.00397296837163023	0.00181987804103576	1.41130808057369	0.0384635739044197	0.582115825063994	2.18309594491786	1.12637553674898
3336		0.00371254488084304	0.00103285360499252	1.30213067817802	0.0497487579535549	0.617764164538601	3.59445410549728	1.84577268329525
3361		0.0496287219832473	0.0146474704016562	1.46898693735841	0.025032130588121	0.529874154497598	3.38821111238673	1.7605237687978
3370		0.142404210387279	0.0250684292643688	1.48749368419709	0.0135263537105986	0.459229940240795	5.68061959070114	2.50604829446269
3377		0.0200347255921992	0.00100242376895868	1.56706728425605	0.00803194446446336	0.399163484610958	19.9862834587524	4.32093831613822
3398		0.00155591445877009	0.000593573957479798	1.07612186619976	0.0306747696763773	0.552137015810873	2.62126469526427	1.39026304434303
3472		0.00725963644051826	0.00068580162639853	1.36015317053944	0.00589299748328127	0.369291124330133	10.5856214990945	3.40403406969717
3479		0.0177954891838058	0.00234111616864486	1.26326354760807	0.0113301697285712	0.432830048142985	7.60128413196453	2.92624316254593
3489		0.0016785381836516	6.56941758402918e-05	1.57987321172605	0.0295531016653127	0.545387327386558	25.5507914085454	4.67529607268435
3556		0.00768702042936153	0.00441628676215633	1.56817792927937	0.0232502018275762	0.526824107921759	1.74060717597247	0.799590649156992
3561		0.00101369071601737	0.0145092580019865	1.36578143052177	0.0453548425737457	0.609143466466976	0.0698650968835605	-3.83928429395851
3568		0.0569575759363016	0.000226216310667238	1.67611176281135	0.00367527147806046	0.320249791974632	251.783683361743	7.97604098317389
3584		0.12247814766176	0.00168078578328388	1.68000934861043	0.000587250551496457	0.232896562145433	72.8695761707748	6.18724469450092
3587		0.00542308626430237	0.000460837367363084	1.50071101580698	0.00685824791417843	0.383192790767751	11.7678961134018	3.5567845105848
3610		0.037147081034425	0.000717242731430023	1.71395190165354	0.0412177924423041	0.59039483022588	51.7915057296739	5.69464359730583
3627		0.0223206982096314	0.00197498456683217	1.57810632376366	0.000601130700991927	0.232896562145433	11.3017076611557	3.49846887178861
3638		0.0156378796013574	0.00031413055355572	1.55166944732596	0.0111498465500947	0.430193340910265	49.7814664137201	5.6375368233309
3648		0.202938238400864	0.013052408455963	1.59520121090657	0.00128943135099608	0.268479573812009	15.5479533976851	3.95865278345345
3649		0.0568274136631582	0.0051879130365229	1.64746350154044	0.000769437433622541	0.232896562145433	10.9538099931694	3.45336085532631
3657		0.0200439459888553	0.00171981227541973	1.59652512647706	0.00332161595734729	0.318376889511738	11.6547289930021	3.5428435528078
3660		0.725245756710542	0.0492705732899472	1.56780257259454	0.00138272598171933	0.271121974201849	14.7196532998027	3.87967178608216
3661		0.00045552380147347	0.0129874733384843	1.50064349442611	0.0444348843178474	0.60746875791188	0.0350740894399889	-4.83345053931414
3669		1.50852404692309e-05	0.00367201687498648	1.75602037014046	0.0144022060339926	0.474653830983173	0.00410816207626672	-7.92729118430742
3689		0.0636674595968205	0.0027415167523189	1.58756486980369	0.00692424254905952	0.383192790767751	23.2234435711427	4.53751000570683
3747		0.00172130472679471	0.0105728274872914	1.52986759310678	0.010975091216219	0.42744441772645	0.162804578894693	-2.61878681877356
3751		0.0284806630522327	0.00109645267631077	1.49568490262556	0.0388749794164591	0.584750748012115	25.9752779737485	4.69906728306219
3752		0.0261170121096714	0.00338324510564591	1.24347882806522	0.0214429292816937	0.511796108080866	7.71951522698954	2.94851025143408
3753		0.0250423248720242	0.00108483444873165	1.52672648720641	0.000914951963973952	0.244739011386707	23.0840059525237	4.52882170302765
3769		1.50852404692309e-05	0.000464323129135763	1.73395832877061	0.0046594322323394	0.351143060044428	0.0324886690381089	-4.94391954772171
3853		0.00921094448395441	0.000334457701640354	1.50529855075997	0.0144196231840657	0.474653830983173	27.5399383502881	4.78345342480929
3873		0.00569105224203833	0.0194124871629577	1.33506992460411	0.0293239009064565	0.545387327386558	0.293164507683375	-1.77021764246827
3892		0.01554094245858	8.42232588277487e-05	1.63439410662668	0.0493377730679087	0.617764164538601	184.520792413933	7.52763958287514
3903		0.00593730411307259	0.00117198525617124	1.64087494503286	0.0068077843892922	0.383192790767751	5.06602287171185	2.34085359043983
3978		0.000437825354289331	0.0021396448433365	1.18929674753086	0.0417252186867551	0.594768423144588	0.204625246873495	-2.28894393762372
3993		0.034638476133332	0.000101908315986463	1.67569064119936	0.000716668588883986	0.232896562145433	339.89842534473	8.40895986806322
3998		0.00527239862190834	0.0227415395300525	1.61368526987592	0.0293126543364317	0.545387327386558	0.231840004276798	-2.1087985682662
4008		0.0212552753846631	0.00113897141915266	1.44579409814219	0.00139856915806012	0.271121974201849	18.6618162907687	4.2220175004857
4010		0.017245959163835	0.000801434481410609	1.45723537304844	0.00928746575918941	0.402839999106982	21.518863442811	4.42752997627997
4012		0.0216905951962192	0.00133997418440259	1.29669195862945	0.00614464906187846	0.375869357126756	16.1873231952522	4.01679253005098
4016		0.0305732198827442	1.45372681120067e-05	1.75121364514361	0.00295463038263268	0.318376889511738	2103.09252379359	11.0382966062876
4019		0.084497917844187	0.000272822399492738	1.68034874248346	0.015392254218195	0.487972820084527	309.71766981485	8.27480988285208
4021		0.0613162548908689	0.00964414881644558	1.16842167136063	0.0347751094105178	0.565747253804491	6.35787108410336	2.66854376384765
4022		0.178576410419186	1.45372681120067e-05	1.75157508517006	0.00432392717341852	0.34823135796686	12284.0418876017	13.5844977164591
4024		0.0573593978689905	1.45372681120067e-05	1.75131634254483	0.00323200293202896	0.318376889511738	3945.67930006161	11.9460579850183
4026		1.32433376488738	0.00729889967095682	1.52964789981473	0.00203158421755868	0.295788375574176	181.442933125531	7.50337205732058
4027		0.672745787877577	0.00336152377554351	1.56858712757561	0.00181147016149758	0.277807063967268	200.13120025272	7.64480228925722
4028		0.0350904029722995	0.00587221530648645	1.61453984321179	0.0036567232876516	0.320249791974632	5.97566695715987	2.57909974440511
4031		0.231999033801721	0.00017859637826888	1.67924501645359	0.00124334720683665	0.264832955056207	1299.01309338112	10.3432002571421
4032		0.0903255733925316	0.000823545107734779	1.59216551184447	0.00617625704198895	0.375869357126756	109.678962990842	6.77714302545889
4034		0.188928429272518	0.00221046149054839	1.5306201526549	0.000641639049511559	0.232896562145433	85.4701292378758	6.41734839874567
4036		0.00339220009703165	0.00104172967676163	1.54533712049659	0.027397092259736	0.535920672060347	3.25631511965446	1.70324031863511
4037		0.0560283020480388	0.00186355745700954	1.45535982121211	0.000372736116770669	0.225642674478749	30.0652399191102	4.91002456610152
4041		0.0335786514859696	1.45372681120067e-05	1.75116635991708	0.00542673986499274	0.355066701030347	2309.83230323971	11.1735723986122
4051		0.0398858843677023	0.000531832796805781	1.60364181857328	0.000295629198197051	0.212520439853905	74.9970378044739	6.22876170877332
4055		0.599504040121647	0.0424777704568564	1.67956982247984	0.000760137239147965	0.232896562145433	14.1133593800679	3.81898952606203
4058		0.0046974464707452	0.0266564406682072	1.13697296105742	0.00797756789712124	0.399163484610958	0.176221819304923	-2.50453552900514
4066		0.169010414968302	0.010224099636454	1.73586664488519	0.000501233379659271	0.232896562145433	16.5305915413516	4.04706644677135
4068		0.173575406160472	0.00784506624183569	1.34717051777355	0.00247023201363423	0.318376889511738	22.1254226299378	4.46763310806229
4075		0.670711199102843	0.0260858442678435	1.63348588871523	0.00285855741561163	0.318376889511738	25.711692219586	4.68435265941381
4119		0.0410893769233354	0.00947408198359794	1.68784787005183	0.0114848776901522	0.434536392079375	4.33702990901616	2.1167073923457
4124		0.0323712192099397	0.00298961801030358	1.65882714698233	0.0445748192633885	0.608184544682674	10.8278780427379	3.43667863818751
4126		0.43881866657378	1.33931812366333	1.47613177026427	0.0328074437006837	0.558211860126131	0.327643342399873	-1.60980187792894
4127		0.102044431932756	0.324298245496569	1.47008708684711	0.0313528507986718	0.552344182731403	0.314662300366456	-1.6681237549304
4128		0.00212802590357516	0.0235962141015193	1.27994841847248	0.0339211758302132	0.56390592444567	0.0901850565696531	-3.47096778732374
4131		0.018078593766603	0.000109396400134779	1.69406009206313	0.0166671828936819	0.499234212612315	165.257666105372	7.36857338795654
4133		0.0274947000461521	0.00302417541002301	1.5445921725548	0.0156937298229217	0.491850900335818	9.0916353446386	3.18453982042591
4136		0.0777051933311448	0.00422453223493834	1.62461005660434	0.00315578646832986	0.318376889511738	18.3937981792389	4.2011475109376
4139		0.0395296307166209	0.00286973441030341	1.59613494656016	0.0068312122614291	0.383192790767751	13.7746652006175	3.78394534876338
4142		0.0118174345281841	0.000191979618524454	1.56778958097328	0.00970897485687626	0.407975813388389	61.555672518845	5.94381990590611
4160		0.00423768727685395	0.00114879536041613	1.64211262068828	0.00074263257491342	0.232896562145433	3.68880953289967	1.88315529918858
4167		3.95653572740974	0.391697428751796	1.67192502721173	0.03682404149099	0.576808441914088	10.1009999989478	3.33642622173643
4170		1.13330756763342	0.116191195503934	1.67543073766313	0.035480270529578	0.570760939344344	9.75381622263329	3.28596678996725
4173		0.0315560129976013	0.00314972380803704	1.27674135956474	0.0173535678239511	0.504036231444459	10.0186603400212	3.32461770421685
4179		0.273249396710315	0.0243299649083692	1.49551073727612	0.0456827888455405	0.609143466466976	11.2309819491898	3.48941216610711
4207		8.66026306964069	0.861466569803403	1.68104824191936	0.0488142149090578	0.617668976770058	10.0529299373939	3.32954413262049
4208		2.27907935080458	0.219414018755904	1.68879361250909	0.0486169413258406	0.617391903164145	10.3871182148121	3.37672354567652
4210		0.429612149915993	0.0363276524762302	1.69195868759194	0.032198012365428	0.556017997888663	11.8260366589087	3.56389474924392
4212		0.0227495942766335	0.000497017369578248	1.51073610951231	0.0448563020677784	0.609143466466976	45.7722318556754	5.51640073440323
4213		0.00358355287087606	1.45372681120067e-05	1.73817756512677	0.0292451663665274	0.545387327386558	246.507998838951	7.94549065056882
4217		0.045929372764687	0.00159838474152075	1.64287795645638	0.0223425110206374	0.525620082339449	28.7348668762869	4.84473046031732
4229		0.123220924388851	0.0427695825878643	1.47543549480158	0.033343792830116	0.561114350053351	2.88104107950341	1.5265902314014
4251		0.00994521173910955	0.000104166240491884	1.62533803166181	0.0246532637538128	0.527566476585498	95.4744233078509	6.57704239548099
4253		0.00508178052047932	9.63382242988679e-05	1.60266433712164	0.0321596706739949	0.556017997888663	52.7493687730244	5.72108192475503
4255		0.00464836962802437	0.000870060595689092	1.09853739143073	0.0457682657055321	0.609143466466976	5.34258148346879	2.41753700660991
4299		0.00416885390622546	1.45372681120067e-05	1.74764388530017	0.00886251179651814	0.401483066452213	286.770105229215	8.16375082578976
4305		0.00852272454863184	0.000470307733917749	1.44212398057631	0.00481088091132139	0.351143060044428	18.1215913198705	4.17963774389635
4356		0.000932796314010419	0.000162554427633192	1.33446370108311	0.0331585895353489	0.560867789464092	5.73836300611445	2.52063923519547
4382		0.0048510950456562	0.00192244214804312	1.52516332035454	0.0344446405728494	0.565260333367764	2.52340235600546	1.33537026209417
4390		0.0358340944437351	0.0111422764310909	1.59732806191015	0.0408817709256128	0.589820945049004	3.21604787543641	1.68528888323966
4395		0.00693898531909407	0.00118023188446381	1.51114250582531	0.0200199918681715	0.507985905744258	5.87934067062298	2.55565437537514
4493		0.000660239381567227	0.00325873566770606	1.64081839064855	0.048460127804332	0.617391903164145	0.202605994745193	-2.30325123337807
4503		0.000754458518841484	0.00475537278265256	1.26358114859007	0.00514489621005362	0.355066701030347	0.158653917016501	-2.65604495440382
4520		0.0331270507928572	0.00210596077040712	1.73055723094169	0.00293906962435904	0.318376889511738	15.7301366950217	3.97545930272761
4526		0.017528236939202	0.000555331746934197	1.69807138021826	0.00356771855696544	0.319647658338795	31.5635420376551	4.9801872075082
4541		0.0134784181141735	1.45372681120067e-05	1.74539020426664	0.0248142465512741	0.527566476585498	927.163068764027	9.85667929109309
4543		0.197758329150118	0.000951577305819921	1.61038222401844	0.0243047984478266	0.527367929949365	207.821611487173	7.6992018784931
4544		0.0989555859832932	0.000245465465163677	1.69077299969466	0.0238632724941086	0.526824107921759	403.134452813186	8.65511727432497
4545		0.653655918064282	0.00400646061916815	1.71197057909556	0.0247120420601349	0.527566476585498	163.15046625867	7.35005930020854
4546		0.359591526798429	0.00193771654392645	1.68100686151385	0.0258331205023446	0.530972149339522	185.574886030429	7.53585767259537
4547		2.13719015898495	0.0155422691252567	1.72798866773176	0.023833361914379	0.526824107921759	137.508245531018	7.10337432063051
4548		2.12235380590679	0.0147130790775507	1.71137100276478	0.0256439779547779	0.530972149339522	144.249466391102	7.17242217182514
4549		7.32968693519848	0.0479328401726738	1.71729116375642	0.0251070608764729	0.529874154497598	152.915765241407	7.25659334247153
4550		0.0979536432258426	0.00027568932623604	1.67912882543125	0.0269037949859154	0.533620154995083	355.304445635217	8.4729119298251
4551		0.00284764666682236	0.0170847372665459	1.47484655545728	0.0385530958486964	0.582703953287393	0.16667781437871	-2.58486600745487
4553		0.32838463342747	0.0102382279145467	1.73981740544468	0.00501068898816357	0.355066701030347	32.0743624940107	5.00334868566235
4554		0.104475902393533	0.0025284205314362	1.7381053419519	0.0134454858512499	0.459229940240795	41.3206193726755	5.36878997443376
4556		0.0663115312658183	6.99806405045291e-05	1.72693072830895	0.0259955704326766	0.530972149339522	947.569653374731	9.88808818570741
4557		0.410139776288727	0.0112116395732971	1.73649747568252	0.0101820333104807	0.41727470706163	36.5816055365856	5.19304649006254
4559		0.0300132513315579	0.0038284688384777	1.52451155494168	0.027392562322631	0.535920672060347	7.83949213061688	2.97076019459898
4561		0.64148054535552	0.0143075878862038	1.73462603406583	0.00770312979918188	0.399163484610958	44.8349889902876	5.48655313835533
4562		0.173184908529923	0.00395560127747527	1.68600607862113	0.0118609995124706	0.442920185557888	43.7821955200856	5.45227239720247
4564		0.0859700495387205	0.00223513510592738	1.69368044850196	0.00897328753654996	0.402839999106982	38.4630214570634	5.26540019271611
4565		0.627954982125488	0.00276836734742968	1.72022586956457	0.0220464151664706	0.522645096153181	226.832245622504	7.82548193275735
4566		1.7168484097278	0.0570747664156425	1.73786541314245	0.00774198653572645	0.399163484610958	30.0806909523727	4.91076580093592
4567		0.257552211699376	0.00794686821831399	1.73671382615554	0.00791091174951882	0.399163484610958	32.4092717563673	5.01833469822496
4568		0.0669296941916238	0.00318093895088685	1.72711863953347	0.00392347450931934	0.331822086810228	21.0408609611837	4.3951218336914
4572		0.00477357681962018	0.00130756614288198	1.41466312183252	0.0316321621343889	0.552344182731403	3.65073449294031	1.8681867496693
4576		0.0109642017709787	0.000227316262894627	1.63405118985302	9.82197492865731e-06	0.0564861778147082	48.233248388661	5.59195607016235
4584		0.0601416133612798	0.00565798748008475	1.70462340575723	0.0496420240978941	0.617764164538601	10.6295062640151	3.4100026807498
4626		0.00360686997315323	0.000263764928847011	1.42488606025187	0.00467167442852946	0.351143060044428	13.6745623799186	3.77342275880658
4629		0.0357818725628997	0.00307027248395693	1.44077007165337	0.0499496325005129	0.617764164538601	11.6542986819152	3.54279028523441
4631		0.013178274659332	0.0010081916341058	1.54375745467853	0.0467058326855481	0.613569835730161	13.071200170214	3.70831970733846
4680		0.00594583152567407	0.00012610830495186	1.54991075301146	0.0465032340118466	0.613569835730161	47.1486118851871	5.55914339164486
4687		0.00494346599702556	1.45372681120067e-05	1.74347372616377	0.0427098868872914	0.596900509085814	340.054675949922	8.40962291960835
4694		0.0466216548176802	0.000328941720612404	1.65497212504976	0.00810276749694534	0.399163484610958	141.732264094937	7.14702440216846
4695		0.0147865930399092	0.000201341757197128	1.6510220993705	0.0010700463639462	0.264832955056207	73.4402701444195	6.19849946049226
4697		0.000588387558532366	0.0026701669021741	1.23200215693352	0.0251812740457931	0.52987711411209	0.220356097610711	-2.18209127600734
4713		0.00719066110834757	0.00123489021190738	1.67561852263827	0.0211598027287187	0.509835104166594	5.82291529968569	2.54174163343663
4721		0.110791658740526	0.000381824429259735	1.66734479740851	0.0455555488854093	0.609143466466976	290.163882272603	8.18072414298699
4728		0.031065355034457	0.00380086025884791	1.71386330797939	0.0062340411192397	0.377389162913132	8.17324313940269	3.03090865275594
4740		0.014756411859047	5.20560534216309e-05	1.69002475220321	0.0297669113050788	0.545904234988099	283.471582824895	8.14706030634449
4744		0.069133109339078	0.0055854598117544	1.49755062457101	0.00288824584146397	0.318376889511738	12.3773353795492	3.62962885625067
4786		0.00201273241821132	0.000323452437609567	1.32169720205365	0.000631765529372996	0.232896562145433	6.22265342344042	2.63752989619996
4910		0.0477428214595153	0.0176021586881061	1.54636964840366	0.0342336361229088	0.564928669563411	2.7123276358016	1.43953145944639
4961		0.00235352765562593	0.00745493860966439	1.53447212754298	0.00757883255060538	0.399163484610958	0.31570047439088	-1.66337166635286
4996		0.0270264134986612	1.45372681120067e-05	1.74090092507142	0.0397688487236557	0.588582644644353	1859.11226857951	10.8603981794124
5014		0.0138796234642811	0.00251950864582835	1.55810944014963	0.0462602386094558	0.612296046589137	5.50886121675434	2.46175411793616
5017		0.00251094887879244	0.000170461796958229	1.54261281075958	0.013804298863923	0.464260367055094	14.730273431341	3.8807123055991
5020		0.0372264736567115	0.00730212870025131	1.64042500962295	0.0294502221162237	0.545387327386558	5.09803033948584	2.3499399591772
5022		0.0480216111569868	0.0101267275014115	1.63027787590669	0.0337105420956087	0.56390592444567	4.74206609689985	2.24551577184672
5023		0.539309036569276	0.0964380258377015	1.65282390467023	0.0317020165100178	0.552479687724583	5.59228615356453	2.48343818434821
5028		0.120238412090422	0.0528819560546812	1.54621243007814	0.00639893106634916	0.379384047036845	2.27371339982381	1.18505041486734
5038		0.00889995560540653	0.00425999161637094	1.44741095927852	0.0429225744944087	0.598418729496593	2.0891955681801	1.06294754843061
5062		0.115380084809309	0.0130361311224445	1.673867365201	0.0223456930864844	0.525620082339449	8.85079198157629	3.14580655539573
5088		0.0198382252375575	1.45372681120067e-05	1.74109354650005	0.0375392990371043	0.577503163089241	1364.64603147634	10.4143110710762
5119		0.28658403781894	0.0655918571205479	1.6567056240993	0.0231494018816622	0.526824107921759	4.36920145883721	2.12736962831925
5123		0.00785645385852678	0.00126949381240567	1.5717132619016	0.0393349387426783	0.586049825671355	6.18865076911163	2.62962491171993
5126		0.545376131483286	0.248729644257588	1.4530415134956	0.0375133433039091	0.577503163089241	2.19264628915115	1.13267309972465
5127		0.0174115204678592	0.00216921030204627	1.2506771202644	0.0313282995725736	0.552344182731403	8.02666318311068	3.00480036013716
5128		0.0163326348078478	0.00788748660606379	1.42995586960317	0.0223463936936177	0.525620082339449	2.0707020656354	1.0501199923074
5130		0.810773933856941	0.285238052088756	1.60174541022108	0.0204088332733013	0.507985905744258	2.84244660878787	1.50713325045072
5157		0.0242006558501885	0.0060729487268682	1.5761129520805	0.0263209470797799	0.530972149339522	3.98499261867945	1.99457705194362
5169		0.0173243167009358	0.00355885315127311	1.51214129820362	0.0200054635336147	0.507985905744258	4.8679492984245	2.28331414190282
5224		0.00164570508436567	0.000240097208690773	1.61724922595428	0.040009268753155	0.589227412546464	6.85432826703628	2.77701528696718
5255		0.0437464627409435	0.015098770775208	1.48638221238363	0.0401555073691673	0.589599591058699	2.89735259858205	1.53473526668335
5258		0.0715958597634817	0.0190791448953815	1.56354167240452	0.0431541937737295	0.599175464380548	3.75257172981652	1.9078796489976
5353		0.0139943583396796	0.000144475409900965	1.67004154583866	0.0206272248153268	0.507985905744258	96.8632540947451	6.59787756558957
5354		0.00271142552818731	1.45372681120067e-05	1.74275501866254	0.0146075327661347	0.475337035978402	186.515479201204	7.54315155666336
5357		0.00202429342515775	1.45372681120067e-05	1.75304722174699	1.5225155303209e-05	0.0583732454325034	139.248544469359	7.12151843728393
5358		0.430118368636323	0.00884892447917781	1.61035763267184	0.0168948333745841	0.501806914022039	48.6068526913552	5.60308781709093
5362		0.0300418166062123	0.000237397507860038	1.64630226898564	0.0232381868593381	0.526824107921759	126.546469998851	6.98352345395045
5371		0.0014904760609038	1.45372681120067e-05	1.73700341434659	0.0347627666569855	0.565747253804491	102.527933681898	6.67987321456908
5374		0.103512813232101	0.00142416015642242	1.53219880713299	0.0207650224979332	0.507985905744258	72.6834076668253	6.18355415492145
5376		0.00448848489253192	0.000134032705327551	1.62961991847628	0.00940300465445407	0.402839999106982	33.4879825156323	5.06557155835016
5379		0.0363926135305684	0.000807687449521234	1.52303867317042	0.0262427264721825	0.530972149339522	45.0577925311833	5.4937047297584
5385		0.175889848052127	0.00164060830756075	1.54805622175652	0.0236296211436695	0.526824107921759	107.210141044354	6.74429756704828
5386		0.0080693981938719	1.45372681120067e-05	1.73269866485649	0.0480863418523202	0.617391903164145	555.083536445696	9.11656109375445
5392		0.008583812717766	0.000683587192615904	1.42588814464744	0.00549873952828541	0.355066701030347	12.5570122004745	3.65042132692475
5396		0.0210427220635148	5.64230128800034e-05	1.72437522513432	0.0184662217454996	0.507547717915738	372.945735958252	8.54282192170554
5397		0.0315219115438061	0.000132977064436913	1.6964157559948	0.0241740999507018	0.527367929949365	237.047732082857	7.88903378014565
5398		0.0255876277584689	0.000100745853480654	1.69948171524234	0.023438904060541	0.526824107921759	253.98194441206	7.98858212916169
5399		0.00284338172367753	6.32735294268709e-05	1.63264975074519	0.00703269074436633	0.383192790767751	44.9379345428138	5.48986191114264
5400		0.107824527591888	0.00069423450956734	1.60944574563127	0.0232136088320922	0.526824107921759	155.314272203331	7.27904659832085
5402		0.0361265781235103	0.0065103669029365	1.72515431458717	0.0030179318172098	0.318376889511738	5.54908481536046	2.47224985412705
5406		0.0181551405353619	1.45372681120067e-05	1.74431726888229	0.0259838401154738	0.530972149339522	1248.86879676981	10.2864062034077
5407		0.00773971665933719	1.45372681120067e-05	1.73302142371415	0.0440331850943941	0.604379110925681	532.405167167879	9.05638076292404
5408		0.0224837746969141	1.45372681120067e-05	1.74408785366911	0.0304484202853982	0.550039160162282	1546.62998052187	10.5949123688971
5409		0.00611758068823915	1.45372681120067e-05	1.73256649588833	0.0423769079142869	0.596596321701503	420.820517383627	8.71706123567397
5410		0.00620871881471342	8.07675508550306e-05	1.63620599241038	0.0133240450006907	0.459229940240795	76.8714508362081	6.26437599236704
5411		0.0114955094881601	0.000521359100518737	1.50231322397303	0.0107329431667797	0.425021913074348	22.0491202258144	4.46264918735151
5421		0.0401291663017709	0.000191382205982755	1.66878252157734	0.0309276134513206	0.552344182731403	209.680759481823	7.71205067412922
5422		0.00777518290218884	0.000208662691922509	1.60823436911485	0.00326887140465049	0.318376889511738	37.2619696916223	5.21963203296799
5424		0.00833512511047245	1.45372681120067e-05	1.73776616217139	0.0356053645374327	0.571040781544075	573.362549706865	9.1633038649903
5426		0.043415366845543	0.00100532527196391	1.57187934687607	0.00511992518781461	0.355066701030347	43.1853928835695	5.43247150963662
5430		0.0265193810678537	6.0147388281306e-05	1.68878518213774	0.0296170002489361	0.545387327386558	440.906610006474	8.78432929556049
5431		0.00442578283982101	1.45372681120067e-05	1.73489270779219	0.0346934575882012	0.565747253804491	304.443916540663	8.25003267478388
5432		0.0125332362020737	1.45372681120067e-05	1.74099240126117	0.0326636696200253	0.558211860126131	862.145219136617	9.75178708609913
5433		0.0071959041466025	1.45372681120067e-05	1.74225390341355	0.0245681429660378	0.527566476585498	494.997002955406	8.95127597994786
5442		0.00822464141242677	1.45372681120067e-05	1.73968240477149	0.0338724626856343	0.56390592444567	565.762518036924	9.14405279062791
5445		0.00801547364194423	0.000614807394968019	1.42943793635545	0.00544366815249696	0.355066701030347	13.0373735051791	3.70458134998438
5447		0.0118995780933443	6.04379540319889e-05	1.71072325067816	0.0264635089460011	0.531209912560043	196.889161520028	7.62123988480451
5448		0.0220112125424095	0.00013550476921612	1.69068558955982	0.0183744579900376	0.507547717915738	162.438655626233	7.34375118217551
5452		0.00745839478298276	1.45372681120067e-05	1.74441093277969	0.0198485901958131	0.507985905744258	513.053396657292	9.0029651736651
5455		0.0116429109761264	1.45372681120067e-05	1.74223189913496	0.0301334438001961	0.546725610441923	800.900890485071	9.64547991349193
5459		0.00490728126775367	1.45372681120067e-05	1.73664811698103	0.0316462194766123	0.552344182731403	337.56557490335	8.39902397460016
5546		0.00655740471190939	0.0146854768284192	1.69648035100251	0.000704399787230982	0.232896562145433	0.446523105005316	-1.16319326642963
5554		0.129359606551521	0.0333161192529321	1.68483847125442	0.0127743868941919	0.454765948366724	3.88279335805705	1.95709492917809
5558		0.611033099108184	0.187267646188544	1.64724381315936	0.0159636078171417	0.49234453217445	3.26288663068358	1.70614886171971
5577		0.065758907290723	0.0911617732953196	1.64423783858887	0.0052888375289648	0.355066701030347	0.721343002814307	-0.471242662343744
5580		0.0127906612911224	0.00304405743753812	1.60094143605459	0.0331156427421339	0.560867789464092	4.20184623765407	2.07102336899983
5585		0.0259932057394294	0.00571737466426259	1.55258214484834	0.0487777185561538	0.617668976770058	4.54635339921036	2.18470983274175
5587		0.156982190031278	0.0355404057171131	1.58036387621269	0.040873755078047	0.589820945049004	4.41700613326678	2.14306883564441
5588		1.64963317884979	0.384196979494267	1.57985564338314	0.0390308207226046	0.584750748012115	4.29371719949821	2.10222717295792
5641		0.00255906850581051	0.000273885413242603	1.65291973699212	0.00652378601618978	0.383192790767751	9.34357356061068	3.22397443132074
5649		0.0211831986913919	0.00301824957133433	1.65825527146488	0.0259762792484017	0.530972149339522	7.01837213614746	2.81113644599325
5654		0.0258507176279791	0.00675660060188479	1.35902873375427	0.021187722117165	0.509835104166594	3.82599463120077	1.93583484923409
5658		0.0515095810286721	0.0156946736275927	1.68121747786218	0.00184830009621821	0.279725627719762	3.28197847568576	1.7145657772053
5659		0.0146217398225745	0.00243721275692882	1.5676703179471	0.0103687958828412	0.419936233255068	5.99936947687718	2.58481088399078
5663		0.0177542778591032	0.0034296150212578	1.63892944013153	0.00069183650390045	0.232896562145433	5.17675533523638	2.37204813489147
5665		0.00430959394495964	0.00123857558657799	1.11382385129625	0.0475179996172876	0.615290546162136	3.47947593321006	1.79887002863311
5666		0.00683860866490844	0.00187010101361624	1.61650654588999	0.00199650105140728	0.294407116580597	3.65681244762524	1.87058663493203
5668		0.051948434133971	0.0219073897523426	1.62932362568441	0.0024912711453471	0.318376889511738	2.37127447501663	1.24566266443396
5669		0.00185077654212582	0.000415636448412666	1.31396560770848	0.041058606984226	0.590320121915709	4.4528735369432	2.15473663935422
5670		0.0120615910089243	0.00580654561183085	1.52941511198976	0.0135204636343569	0.459229940240795	2.07724037926247	1.05466817521171
5671		0.386088642221472	0.177281742272351	1.55265259685336	0.00773168615782791	0.399163484610958	2.17782517969808	1.12288814941512
5672		0.00884933378421043	0.000256309091525488	1.57412661528728	0.0293099818307516	0.545387327386558	34.5260237611604	5.10961228861041
5673		0.0125440049071811	0.00579836379727761	1.51449288552056	0.0153101567976137	0.48780449719156	2.16336976184051	1.11328027093199
5676		0.0153888921374091	0.00650802492502406	1.52025078209625	0.0179086673892068	0.504203988378601	2.36460251991925	1.24159769276749
5677		0.0731023378521683	0.0396085830213867	1.42214789445929	0.0263049523713667	0.530972149339522	1.84561860778248	0.884104454658117
5682		0.00849996258973738	0.00384103005815421	1.54254857710878	0.0158151532081939	0.49234453217445	2.21293831629685	1.14596323784797
5784		0.00493493975663117	0.0138969873719951	1.41577936638113	0.0158669884282145	0.49234453217445	0.355108601924469	-1.49366778717994
5799		0.0208015113736055	0.0128678870173176	1.36732841762146	0.048595103562892	0.617391903164145	1.61654445252829	0.692913179941791
5858		0.0357926550588148	0.0132481876951201	1.56598070815705	0.0327014754427257	0.558211860126131	2.70170198992566	1.43386854758456
5907		0.00146189898254983	0.000510844299989231	1.60828522785046	0.0279187662959582	0.541632279156732	2.86173102563863	1.51688807939755
5916		0.0976754011074114	0.108875483628725	1.43027932190275	0.0403701947434091	0.589689146727554	0.897129434946929	-0.156611947329636
6038		0.0603321291395696	0.0238750322486729	1.52131799402898	0.038990411186002	0.584750748012115	2.5269967600954	1.33742381458055
6087		0.00360264743467171	0.009735607237479	1.35244628649821	0.0370444092801407	0.576808441914088	0.370048559560072	-1.4342134943087
6135		0.004092801274923	0.0079961106382248	1.50819577303211	0.0476109359576046	0.615304477959965	0.511849005109769	-0.966209815340592
6165		0.0032257970260348	0.00167821806530591	1.48114591429144	0.0200727624282455	0.507985905744258	1.92215606107588	0.942725474197006
6200		0.00593251151492849	0.00178616908842469	1.60479669673641	0.0270011241703302	0.533620154995083	3.32136053264737	1.73177433543652
6202		0.0413791952443958	0.0144848992183991	1.50448103012972	0.0417889091280566	0.594768423144588	2.85671267852764	1.51435594068163
6340		0.00406970906837086	0.000421262394278873	1.66009275354479	0.00767077234787908	0.399163484610958	9.66074618489856	3.27213462546656
6344		0.00761432824350209	0.000698224529740274	1.64797942059659	0.0307222822221317	0.552137015810873	10.9052717559701	3.44695381682433
6345		0.0125930265582119	0.000716917159446296	1.43014335121216	0.0308373085926079	0.552344182731403	17.5655253780478	4.1346748225418
6349		0.244216233793533	0.0414493747333636	1.60526000033854	0.0436985343793093	0.602365018968062	5.89191599063996	2.55873685998151
6351		0.00421354190170313	0.00111131990303974	1.46585008786259	0.0396036680476559	0.587108465947406	3.79147524504694	1.9227593034355
6352		0.0270102483794535	0.033271744335629	1.53260249773293	0.0301197567785441	0.546725610441923	0.811807403512945	-0.300790597716123
6353		0.083725663505213	0.0131850102440406	1.59927401410422	0.0472763088672403	0.615290546162136	6.35006435001107	2.66677121188031
6360		0.00498092828329379	0.0013946897801391	1.71036644450618	0.000131800365055595	0.137815254442678	3.57135210584034	1.83647037875946
6377		0.00164363071498313	0.00429166310143382	1.4658999857155	0.0248101515860136	0.527566476585498	0.382982232327138	-1.38465063205337
6392		0.129720844978544	0.100399374947996	1.51588041380263	0.0315157126626424	0.552344182731403	1.29204833242972	0.369660038803092
6561		0.00380146333400324	0.00192723723671125	1.43326171303586	0.0289217841922198	0.545387327386558	1.97249371358675	0.980020702321533
6564		0.00920225831357931	0.00383559015289048	1.40111352283713	0.0325684896740155	0.558211860126131	2.39917664473211	1.26253938318243
6566		0.00967010034483577	0.00452090378199137	1.56171241498288	0.0146640615617747	0.475337035978402	2.13897503931753	1.09691964712992
6574		0.0172508807946197	0.00913295950418109	1.44439085773427	0.0228025408456535	0.526824107921759	1.88885988016505	0.917515683362701
6720		0.00535009051569764	0.000202663107153469	1.50903498834931	0.00705752442243607	0.383192790767751	26.3989365940502	4.72240791078209
6768		0.0022739000101646	0.00427958540405989	1.41409380017392	0.0343578638007927	0.565260333367764	0.531336518721518	-0.912302222340145
6793		0.650519637408667	1.77061100124103	1.5824016287896	0.0468493122192041	0.613569835730161	0.367398393522187	-1.44458277671965
6797		0.0523439566118618	0.139804857620105	1.57123918290473	0.0485148888628473	0.617391903164145	0.374407280998041	-1.41731960398947
6798		0.127844643142427	0.353420976390375	1.5993098196983	0.0399560489983347	0.589227412546464	0.36173473472954	-1.46699595883437
6802		0.0746605012996172	0.00755309875635211	1.58803317889462	0.00206870524589626	0.296930349790781	9.88475110785863	3.30520464021056
6815		0.023304058102045	0.0453392464351637	1.68080290236317	0.00992420550500963	0.412208354200045	0.513993061957269	-0.960179209295829
6870		0.00213686323294067	0.000124777768081886	1.59136732960097	0.0041725166209441	0.342544114714126	17.1253522625789	4.09806175900426
6891		0.00559812447679872	0.0133869765533911	1.48436393354759	0.0253329455683542	0.530745974366503	0.418176909063206	-1.25781469364789
6898		0.00593687873066133	0.00102520721673059	1.4409677224116	0.0352618021751886	0.56959204830121	5.79090610539613	2.53378910494758
7003		0.00200903382491577	0.00152378036482148	1.3178041145383	0.0497637520353592	0.617764164538601	1.31845367698457	0.398846883937671
7015		0.00313599028461391	0.000390551739776204	1.65577657098463	0.0022467043219104	0.311344495308595	8.02964105706176	3.00533549748466
7037		0.00213999663626368	0.00413450777983835	1.4087555607643	0.0432894114849796	0.599175464380548	0.517594052355938	-0.950107055389038
7038		0.0106508760443258	0.0234193392450729	1.44458257311618	0.0296255209651257	0.545387327386558	0.454789775786121	-1.13672827378926
7190		0.00912158203006003	0.00230851603362989	1.72246509811952	9.35133560471935e-05	0.134448827656852	3.95127514696848	1.98231831185487
7249		0.00361660995196041	0.000242467077265598	1.51921694950091	0.00562724561121792	0.359580994556825	14.9158805094136	3.89877723977936
7254		0.00912627619198304	0.00347962035668858	1.6770357522259	0.00765516740179843	0.399163484610958	2.62277928522874	1.39109640558088
7262		0.00239566370126807	0.000554237235353551	1.57091697192186	0.017550404934801	0.504036231444459	4.32245173808986	2.11184985568777
7304		0.0014512500133409	0.00067977726334082	1.27023278077588	0.035308566374436	0.56959204830121	2.13489048781745	1.09416206669128
7320		0.0385517652091073	0.00967379334094504	1.68952304075407	0.000436503717829647	0.232896562145433	3.98517560282522	1.99464329654785
7345		0.000981923483777687	6.89615469770187e-05	1.61474815863154	0.0313571476936193	0.552344182731403	14.2387102207106	3.83174656405274
7375		0.00432750421393749	0.00200407915213337	1.48228391457305	0.0314223731168189	0.552344182731403	2.15934795256505	1.11059573478846
7394		0.000341701024617329	0.000129262162289634	1.0537548365094	0.0350795516270911	0.569090271953176	2.64347291244974	1.40243454356219
7573		0.00494521984852606	0.00280627051639746	1.46845986369556	0.025605657536644	0.530972149339522	1.76220354368205	0.817380572669736
7589		0.00207419648372199	7.12629080116078e-05	1.60054124817395	0.0068713049025648	0.383192790767751	29.1062565589399	4.86325739703665
7710		0.000980577939726533	0.000142338325042522	1.4008560193402	0.0361135840386758	0.573727132061946	6.88906476476802	2.78430814101194
7721		0.000132105948966719	1.45372681120067e-05	1.72819448303964	0.00493665035499737	0.354438160703085	9.08739853656616	3.18386735101462
7739		0.0101661113670379	0.00135834247604378	1.63895417129436	0.000611095671064654	0.232896562145433	7.48420339224544	2.9038487660876
7754		0.00339323800642819	1.45372681120067e-05	1.74998468627107	0.00552572939353435	0.355066701030347	233.416483777006	7.86676263695374
7759		0.0182240066465895	8.26492719530076e-05	1.66157441776495	0.00209105880134353	0.296930349790781	220.498090496807	7.78462235193976
7760		0.00367562206792369	1.45372681120067e-05	1.74135232103785	0.0269783379628999	0.533620154995083	252.841320639048	7.98208844525824
7761		0.00385580704722816	1.45372681120067e-05	1.74632359356297	0.00638804275655399	0.379384047036845	265.236013914028	8.05113286857224
7762		0.0098811641546127	3.9782714733454e-05	1.69264885211983	0.0239660712156916	0.527070269833431	248.378327643474	7.95639548585592
7763		0.0424277593698635	0.000253096213468213	1.68516743941106	0.00295034624094846	0.318376889511738	167.634903693224	7.38917875732301
7764		0.0164333538961683	3.73720762770026e-05	1.70523744387493	0.0202150614838099	0.507985905744258	439.72279662398	8.78045051814932
7765		0.0746235555003595	0.00042209289533039	1.69183225985535	0.00353982463161535	0.319647658338795	176.794152012316	7.46592674390245
7788		0.000774777226792648	0.00149622901581795	1.56311141921984	0.0154002898357402	0.487972820084527	0.517819945076453	-0.949477559721338
7804		0.0018477249209194	1.45372681120067e-05	1.74275231354487	0.0185615057276765	0.507547717915738	127.102623868739	6.98985000299207
7807		0.00122422860168168	1.45372681120067e-05	1.73944260439548	0.0243039175434528	0.527367929949365	84.2131129624391	6.3959729900903
7820		0.00258441161323879	0.000869695718557145	1.45374231118274	0.0383578019053844	0.582115825063994	2.97162738426081	1.57125322604441
7850		0.00128806425453579	0.000130740746215839	1.52303027655104	0.028714505860188	0.545387327386558	9.8520491263629	3.30042382172476
7861		0.0020678286937253	1.45372681120067e-05	1.74574597941728	0.017379817561937	0.504036231444459	142.243279672158	7.15221668334223
7867		0.0048712113022331	2.61268614112528e-05	1.72717340312226	0.00265435269092403	0.318376889511738	186.444564678368	7.54260292935953
7869		0.00616425042450631	2.76335556713872e-05	1.74823178653888	0.00122825421320419	0.264832955056207	223.071200022551	7.80136045384225
7870		0.0131477080687619	1.45372681120067e-05	1.75277229489028	0.00090293992166027	0.244739011386707	904.413949544132	9.82083943394614
7871		0.0202761879525471	6.58747714285979e-05	1.72962637939809	0.000344801558505894	0.225642674478749	307.798987576368	8.26584467608362
7872		0.00701534628318489	2.79510693921795e-05	1.7209269927018	0.0172223318096913	0.504036231444459	250.986686224883	7.97146702715089
7889		0.00090215374899777	0.000132599338000989	1.36093368328104	0.000876166664924878	0.244739011386707	6.80360673437932	2.76629975200102
7943		0.0911032787762101	0.0458051318778302	1.63306442892183	0.0102305222910259	0.41727470706163	1.98893169916414	0.991993734206308
8109		0.000814601674345843	0.00192722517307792	1.49926646265528	0.0206125618756807	0.507985905744258	0.422681109465202	-1.24235845824581
8110		0.0931556231020489	0.0290384251401212	1.67473402264137	0.00828587021554938	0.399163484610958	3.20801223387765	1.68167964357617
8112		0.00844785430862747	0.00240997459523116	1.63099438587586	0.0239178860551001	0.527018247903757	3.50537068952677	1.80956701589471
8129		0.00130352292880432	0.00020874623857616	1.36290575161243	0.0498000896375105	0.617764164538601	6.24453373481378	2.64259385308464
8210		0.0022719696446718	0.00117442287928084	1.55870361289356	0.0164103908136845	0.498027216725591	1.9345413690025	0.951991580275883
8217		0.00115015889722907	0.000450002373884249	1.08051833148991	0.0422431552715433	0.596336957248113	2.55589517739948	1.35382866956074
8304		0.0247798148882065	0.00544143974565738	1.69686679375024	0.00391040030698955	0.331822086810228	4.5539077976527	2.18710508172139
8311		0.029811188365584	0.0524541947487992	1.36622349092154	0.0497281431340214	0.617764164538601	0.568328014725008	-0.815204262643132
8338		0.0109288185944535	0.0416987051643292	1.33244960318039	0.0109890928977103	0.42744441772645	0.262090118899003	-1.93186513146951
8348		0.00241050481276776	0.000442799084002922	1.69324477278041	0.0160368651839318	0.49234453217445	5.44378906789213	2.44461116739269
8385		0.00603362919008795	0.00055034275898089	1.55243422519495	0.0496662536440866	0.617764164538601	10.9634025189336	3.4546237066333
8412		0.015541024216199	1.45372681120067e-05	1.7345350616045	0.0486312871036963	0.617391903164145	1069.04709306168	10.0621096919114
8423		0.0636372188777316	0.00493683911509314	1.6410713417464	0.00590763057526904	0.369291124330133	12.8902760236154	3.68821125180938
8452		0.27654681410771	0.0311280094363316	1.71904435065208	0.00836897007762153	0.399163484610958	8.88417920437062	3.15123849403857
8466		0.156988199466214	0.08513788676718	1.41665276771951	0.0269985434270381	0.533620154995083	1.84392877750793	0.882782932166104
8468		0.160970287489507	0.0434764078873184	1.42729388518897	0.0128103084046964	0.454765948366724	3.70247440650358	1.88848976286376
8469		0.386559858341926	0.0424631578728244	1.68874112961585	0.0202774940632339	0.507985905744258	9.10341759083624	3.18640826132533
8488		0.0534907858451205	0.00744131742501048	1.63015369266882	0.0255058869256901	0.530972149339522	7.18834888904705	2.8456604322595
8515		0.341497936499543	0.965841920750726	1.44150391878389	0.0451962311975308	0.609143466466976	0.353575392786953	-1.49991022157076
8526		0.00293697170334731	0.0015814977942608	1.62849572425236	0.0132956629097982	0.459229940240795	1.85708238987464	0.893037822180615
8527		0.0327334142103319	0.00525599215654726	1.50499573902748	0.0380045164398193	0.581287165014365	6.22782782686551	2.63872906054399
8543		0.671361827018803	0.0512043076309136	1.71404510992587	0.0150734401686677	0.484286896145295	13.1114325743462	3.7127534200345
8546		0.042384859140631	0.0687247022481729	1.58775762028458	0.0313136767319947	0.552344182731403	0.616733979982544	-0.697279758703124
8556		0.0156373840080451	0.00594788871943885	1.50503114838547	0.0225445054124667	0.526824107921759	2.62906465565489	1.39454962207984
8562		0.091337755930627	0.164657903811506	1.74824647350107	0.000123012555821833	0.137815254442678	0.554712247735078	-0.850188515175694
8576		0.26165831043329	0.10070334543712	1.58803409214927	0.0051931896248207	0.355066701030347	2.59830802340793	1.37757246908514
8689		0.0129942146089369	1.45372681120067e-05	1.74653105007629	0.0190400120264451	0.507547717915738	893.855331608329	9.80389754326371
8743		0.0530317915755913	0.0248070873391957	1.54212037964682	0.030928540733936	0.552344182731403	2.13776776170736	1.09610513311845
8745		0.0817465957341118	0.0452822992384268	1.4152641328652	0.0498779172603241	0.617764164538601	1.80526601142066	0.852211438265322
8754		0.313515867219911	0.130246979876406	1.40372428054296	0.0207733495861387	0.507985905744258	2.40708742358105	1.26728854034852
8755		0.0874839873025924	0.0336596438022497	1.31511699815237	0.0373929677042187	0.577503163089241	2.59907644348706	1.37799906667577
8781		0.564156501941959	0.268868633532146	1.5227961812612	0.0175304509779828	0.504036231444459	2.09826075481768	1.06919397548739
8790		0.15848547135184	0.067336128444679	1.4951016120376	0.0144046088507059	0.474653830983173	2.35364692049449	1.23489791245061
8805		0.0136562237547904	0.372076361511296	1.67544723659596	0.0117956034592966	0.442920185557888	0.0367027448325975	-4.76796823002234
8808		0.0309476189492382	0.173756869972695	1.12931359765953	0.045428563662611	0.609143466466976	0.17810875019849	-2.48916969940309
8823		0.251086248020149	0.0343765181276192	1.49819759594378	0.0182915217275896	0.507547717915738	7.30400464317002	2.86868768244648
8840		0.0217572576309639	1.45372681120067e-05	1.74899861323444	0.0157665349856165	0.49234453217445	1496.65380478152	10.5475248307842
8860		0.0475374734098618	0.0952772858208619	1.4923347857538	0.0189591941828073	0.507547717915738	0.498938157193527	-1.00306708862215
8882		0.0511799675657039	0.0990685018282778	1.3636093217286	0.0224494228461743	0.52589258976924	0.516611906117422	-0.952847201918043
8911		0.00413518578740749	0.0123407200001963	1.41680286260722	0.0363568880552929	0.574418854961509	0.335084645575113	-1.57740251476144
8979		0.132370976010029	0.019288382772435	1.65106581496195	0.0160748935044104	0.49234453217445	6.86273066911549	2.77878273659087
8993		0.126417757391464	0.0395691862777533	1.56989488772349	0.0453734398349368	0.609143466466976	3.19485360411718	1.67574982492719
9003		0.168738647878549	0.0844194107940839	1.47497099402195	0.0188981323838844	0.507547717915738	1.99881338061144	0.999143781019717
9014		0.028600464041131	0.00758464479085238	1.63935490431785	0.0235292059343853	0.526824107921759	3.77083763706708	1.9148850329402
9032		0.000770159114598814	0.00901543695226675	1.42841039835145	0.0372596007989817	0.577503163089241	0.0854267096177931	-3.54916897463049
9073		0.0296353937297943	0.0082683705911462	1.05248512033729	0.04551352838818	0.609143466466976	3.58418788842483	1.84164626758352
9077		0.0285560605580622	0.00427939797489262	1.6542339873181	0.0301359795705251	0.546725610441923	6.67291537865878	2.73831720869681
9078		0.108444095722634	0.0540200611399677	1.67946089595067	0.00419915842242147	0.342544114714126	2.00747821150465	1.00538432929937
9118		0.00262063082434152	0.0148686272259041	1.7117016460624	0.00116722116218372	0.264832955056207	0.176252372497163	-2.50428541742214
9122		0.023817638864362	0.00798979407010245	1.12739002466066	0.0497345646037022	0.617764164538601	2.98100785269132	1.57580017573965
9137		0.00351776580465303	0.00686717058480632	1.66335594590078	0.0125606813912864	0.45296788342756	0.512258398303971	-0.965056362957488
9157		0.0143414396654633	0.0052960851743625	1.68252111894705	0.00176305262573986	0.277807063967268	2.70793221659046	1.43719162664825
9175		0.0808545363947485	0.0302095997683131	1.50958249794064	0.0196185795763864	0.507985905744258	2.67645175754884	1.42032164862813
9179		1.5110460276233	0.590212114894339	1.47015521124863	0.0237636705001083	0.526824107921759	2.56017453639326	1.35624216733686
9181		0.0429019174775432	0.0137406049924794	1.51246201482493	0.0359198004876022	0.572229286992245	3.12227281848395	1.64259660287559
9182		0.0119621043521785	0.00491258059508333	1.64984244331773	0.00254607678110523	0.318376889511738	2.4349940160067	1.28391822689157
9183		0.0353405416241632	0.0149804434577181	1.64297921742474	0.00164287347839898	0.271536543756176	2.35911184631555	1.23824381887397
9206		0.0110910453325652	1.45372681120067e-05	1.74196271511021	0.0398119716165282	0.588582644644353	762.938761747457	9.57542345172464
9218		0.00229971428487251	1.45372681120067e-05	1.7394715446811	0.0473874422499169	0.615290546162136	158.194391625282	7.30555464345511
9270		0.0687632111768281	0.124453720280742	1.56838910289686	0.0446602222547225	0.608198259969448	0.552520334640962	-0.855900533286783
9274		0.00723102452444127	0.0166863700452712	1.39381494290908	0.0146708961721729	0.475337035978402	0.433349164906631	-1.20639817043265
9280		0.0252628549424784	0.0488693828613594	1.58794201028135	0.0343519364299482	0.565260333367764	0.516946469615713	-0.951913199295574
9289		0.0175639061781184	0.0390493072769574	1.58628074720789	0.038447474229689	0.582115825063994	0.449787906698223	-1.15268322252451
9290		0.00949501689587099	0.0601843711839036	1.20572441350594	0.0210671371799905	0.509835104166594	0.157765491423967	-2.66414642056243
9293		0.054020325026605	0.254239175635626	1.36089957516538	0.0271139184739354	0.534014195697268	0.212478367629805	-2.23461212658684
9410		0.00448995042664401	0.000632669341523587	1.2974562575003	0.0404071237637096	0.589689146727554	7.0968357907645	2.82717592511046
9432		0.0273659101413234	0.0115203538441156	1.48157806246743	0.0344772506941475	0.565260333367764	2.37544006995075	1.24819480941114
9433		0.0617275531841018	0.00651119533549674	1.67375645338197	0.0339755525683228	0.56390592444567	9.48021830148222	3.24492028052013
9451		0.0821284177931274	0.0266589307678115	1.48237854866286	0.0194652559648843	0.507985905744258	3.0807093693454	1.62326258657031
9471		0.145740784431083	0.0447676348071275	1.39557171907596	0.0191866320416732	0.507547717915738	3.25549440034031	1.70287665698711
9483		0.0395618420802041	0.013906793561543	1.5378715473833	0.0468458095870947	0.613569835730161	2.84478531338857	1.50831978117986
9500		0.562444920471753	0.245150826803828	1.49309198207206	0.0426648327797324	0.596900509085814	2.29428114848589	1.19804219461131
9545		0.00903066155882189	0.0200272997884434	1.36303595677478	0.0347169662656408	0.565747253804491	0.450917580213832	-1.1490643365356
9612		0.0101361213176159	1.45372681120067e-05	1.75322609613742	3.24509041210514e-05	0.0933125748000832	697.250765378967	9.4455338026896
9628		0.282956772044041	0.0574660886275133	1.61275293650482	0.00281673127322866	0.318376889511738	4.92389126878157	2.29979890403976
9652		0.400998705648153	0.0583261246787875	1.64173033187175	0.0176379974785208	0.504036231444459	6.87511313080588	2.78138345343881
9672		0.0131720063499441	0.00488799982539836	1.53139556629122	0.0380691324407666	0.581502206286451	2.69476407947102	1.43015897380312
9688		0.0485514300967703	0.134294579241718	1.51209297919013	0.0349795034607107	0.568268713001546	0.361529336261459	-1.46781537561769
9726		0.0100781210267866	0.000720751118297522	1.30938177806181	0.0304728748347405	0.550039160162282	13.9828031770412	3.80558170626017
9743		0.0118269570449129	0.00770502393217757	1.53184759777302	0.0318261012231002	0.553803050329953	1.53496694481653	0.618207587802135
9764		0.0222634725779663	0.0394996211163454	1.31282428647659	0.0427010478202129	0.596900509085814	0.563637623570862	-0.827160178187554
9768		0.0347180984663402	0.00949218963107628	1.65205871812521	0.0122752342068083	0.449648865753849	3.65754370863782	1.87087510506321
9809		0.00537252369547057	0.0121349392454546	1.563564750331	0.00678047738756831	0.383192790767751	0.442731816517578	-1.17549503976477
9833		0.0812110414775015	0.0202242790216022	1.3733661953516	0.0296354616255085	0.545387327386558	4.01552220431479	2.00558761727829
9834		0.0153210868429845	0.00272445980428494	1.51388913914312	0.00938521753185983	0.402839999106982	5.62353198196869	2.49147653121893
9845		0.0562738168311083	0.0133267962396934	1.60868860238855	0.00761956800256229	0.399163484610958	4.22260653040516	2.0781338206462
9846		0.0236490901922267	0.0041425232641503	1.7051434022549	0.00541055096973538	0.355066701030347	5.70886116606456	2.51320297782343
9847		0.0205948813049808	0.00787388211085829	1.42111019103908	0.0284522804526383	0.543618155757883	2.61559431739268	1.38713879401947
9849		0.10507650740171	0.0246082821393077	1.65673198799525	0.00316294066437028	0.318376889511738	4.26996516078899	2.09422429875396
9851		0.816190138285195	0.249537024944222	1.68317586140948	0.00801595088871851	0.399163484610958	3.27081778131976	1.70965138849164
9852		0.154653507833122	0.023120030690585	1.68282073365756	0.021447202581723	0.511796108080866	6.68915668421238	2.74182433878989
9853		2.05278187639863	0.700848790576748	1.70838334591355	0.00319804241840247	0.318376889511738	2.92899396274814	1.55040521953264
9854		0.556476668209157	0.192107582927107	1.70951620727465	0.00262530084207665	0.318376889511738	2.89669288286401	1.5344067333289
9855		0.629802965368718	0.0700656390035757	1.61358172183607	0.0230964901637672	0.526824107921759	8.98875646215938	3.16812154177225
9857		0.0999242634917072	0.0105146289473037	1.60012255668811	0.0233835952958079	0.526824107921759	9.50335613291722	3.24843709462837
9858		0.348397526128616	0.0365849017438141	1.58746923114887	0.0259882939065396	0.530972149339522	9.52298651963781	3.251414090485
9861		0.0182955606279713	0.00385426463677422	1.49095739378167	0.0205485695266101	0.507985905744258	4.74683560993974	2.24696608793222
9862		0.0523319991931147	0.0134605657303637	1.47272028460441	0.0209810223975038	0.50912177134196	3.88780087266812	1.95895432815894
9865		0.460942090527504	0.0805453746989356	1.69137797449205	0.0160025321363138	0.49234453217445	5.72276300470914	2.51671186217074
9866		0.0078026882070915	0.00284608339720095	1.03808380439196	0.049661583832979	0.617764164538601	2.74155290557024	1.45499331454931
9871		0.00950694448227421	0.00108614353145707	1.35151184405808	0.000598527144362446	0.232896562145433	8.7529356912162	3.12976697086831
9881		0.690548972476082	0.40505955529232	1.47567355074379	0.0251051340385374	0.529874154497598	1.70480849903104	0.769609690560433
9888		0.18078898241862	0.0988577921659694	1.46050484577189	0.0288754178342915	0.545387327386558	1.82877827288615	0.870880168581037
9891		0.828007003425439	0.15307037997869	1.66841721196897	0.0235441273874671	0.526824107921759	5.40932219244973	2.43544783049309
9933		0.0278741700410301	0.00672936221613241	1.64583608544425	0.00477651196742595	0.351143060044428	4.14217115170393	2.05038716597106
9968		0.0472580554067642	0.0155644940488626	1.58810856384207	0.00846773519779809	0.399163484610958	3.03627315211172	1.60230158570409
9974		0.00140463917795438	0.00475272715868132	1.04006824322017	0.0230259998025195	0.526824107921759	0.295543828008025	-1.75855600251778
10017		0.0488730394474311	0.0189880806192041	1.339638495555	0.017152570480618	0.504036231444459	2.5738799211755	1.36394474929849
10031		0.336342632164473	0.177902805771418	1.40683672824018	0.0387883321843367	0.584722669441993	1.89059768172869	0.918842391142083
10053		0.103448183684177	0.0532708715044024	1.48381112406339	0.0494413878085976	0.617764164538601	1.94192775080896	0.957489526458136
10061		0.149921900770002	0.0310827680399938	1.63337423956711	0.0228179920842783	0.526824107921759	4.8233124082482	2.27002425717295
10065		0.930631136318016	0.221571276769984	1.65670767910758	0.0169050568885025	0.501806914022039	4.20014340254092	2.07043858565397
10066		6.29772990661161	1.45486852425289	1.66294894754392	0.0177004184432357	0.504036231444459	4.32872785521679	2.113943101943
10069		3.27039119040795	0.766897090742149	1.65691932535374	0.0178727850912416	0.504203988378601	4.26444594703456	2.09235831331629
10071		0.970603285817204	0.418226718290088	1.61829075597326	0.0097187769838653	0.407975813388389	2.32075867793789	1.21459651309907
10098		0.001851672394116	0.00464475511858044	1.39178346350324	0.0490157049995968	0.617764164538601	0.398658776801546	-1.3267736633137
10121		0.0012453733794736	0.0100225753261994	1.30143864510205	0.0250756046658563	0.529874154497598	0.124256824113672	-3.00860300893799
10139		0.00499210046727739	0.0133790414289541	1.54457380559473	0.0243464067817	0.527367929949365	0.373128410864606	-1.42225588039612
10144		0.0632338967427038	0.0161323302411314	1.65994746210159	0.0035237876724544	0.319647658338795	3.91970011756149	1.97074328305061
10152		0.175736160024218	0.064184067431698	1.53988604161882	0.00822914782662013	0.399163484610958	2.73800285734818	1.45312395217649
10172		0.0290467464619447	0.00536226586459319	1.72309161580221	0.010892441844723	0.42744441772645	5.41687920655691	2.43746191985745
10178		0.126602041568337	0.0548023361911337	1.60591601828938	0.00407621860830704	0.339743959657591	2.31015774814395	1.20799136882515
10183		0.462231141400021	0.165564572201661	1.54318801312924	0.00583815541937189	0.369291124330133	2.79184813063156	1.48122046477683
10209		0.0091781477475463	0.0020642331379558	1.58279675033493	0.00469746461265037	0.351143060044428	4.44627478300992	2.15259711072111
10216		7.81758540327571	2.78164631230976	1.58989616848619	0.0294390778487024	0.545387327386558	2.81041675524316	1.49078408280947
10218		0.0102033693574002	0.0168108999014211	1.53099116462463	0.032741046476755	0.558211860126131	0.606949622996546	-0.720351317564806
10305		0.0806331428582473	0.0441632341431997	1.53707411783783	0.0197473384799616	0.507985905744258	1.82579796119083	0.868527128676596
10322		0.00439637380193307	0.00739505243173052	1.44151016962986	0.0418040474146046	0.594768423144588	0.594502046134143	-0.750246319495908
10340		0.535028548742793	0.19053749545907	1.55917247916392	0.0382909786277242	0.582115825063994	2.80799612408952	1.48954094427471
10344		0.0362673349053841	0.0149743335885615	1.47153446980317	0.0100934692243572	0.416111408668663	2.4219665396721	1.27617893382556
10349		0.0104073230551119	0.00294778555157451	1.59898175872886	0.0422547922237187	0.596336957248113	3.53055636952729	1.81989555128947
10357		0.00701557677137554	0.000493771578523833	1.5179827109021	0.00341315515766552	0.319647658338795	14.2081421380087	3.8286460144565
10358		0.389138189948689	0.0585987758837033	1.64957637293362	0.00435970401210466	0.34823135796686	6.64072216663677	2.73134014060427
10376		0.0445739162130358	0.0126547822271712	1.55416445732991	0.0160947264908358	0.49234453217445	3.52229816466779	1.81651703934527
10390		0.00747610406603559	0.0150165673081337	1.61217130031462	0.0277846341229901	0.540742574759107	0.497857060979988	-1.0061965032283
10402		0.176629777608228	0.0195388177330301	1.63768429817318	0.0391359257750556	0.585162633876419	9.0399419259456	3.17631350456309
10406		0.344690271382501	0.0395850098255143	1.62381450339063	0.0310430719673385	0.552344182731403	8.70759595366659	3.12227446572945
10439		1.66725022995201	0.528024021699779	1.57463401332584	0.0257574584723536	0.530972149339522	3.15752723632707	1.65879517852416
10497		0.107996776829294	0.0304476104938447	1.43863872398277	0.0453120701267397	0.609143466466976	3.54697052010459	1.82658733966818
10514		0.287747717365819	0.0771548777262023	1.69935320596088	0.00275278541181064	0.318376889511738	3.72948186616202	1.89897521197071
10522		0.0419468910045063	0.0100761046418225	1.53066486581629	0.00476047874360547	0.351143060044428	4.16300668716749	2.05762587592604
10540		0.023165187075576	0.00208715774929876	1.62223139003649	0.0341910928987011	0.564928669563411	11.0989152992193	3.47234678327324
10546		0.00176577970149037	0.012055298704537	1.26491142443351	0.0392790250853847	0.585975806137607	0.146473326357797	-2.7712901294549
10571		0.0449116673312357	0.0572182893665598	1.68172396660877	0.0024921522901333	0.318376889511738	0.784918036320805	-0.349386083898694
10583		0.00108532390840602	1.45372681120067e-05	1.74102655851734	0.00902168191068722	0.402839999106982	74.65803753799	6.22222568132877
10597		0.00221769955076186	1.45372681120067e-05	1.75076748630255	0.00148403852927483	0.271536543756176	152.552703415452	7.25316393619085
10607		0.0113727620010526	0.000135859298725939	1.60341693542346	0.0459064289830616	0.609143466466976	83.7098535595579	6.38732554854478
10612		0.0429200189589279	0.00457015113730513	1.59089214791053	0.0131188713753625	0.459229940240795	9.3913784619903	3.23133693150206
10618		0.0170707624757245	0.000962828447607952	1.35818917533693	0.0146456315857816	0.475337035978402	17.7298069226508	4.14810492028071
10718		0.00784750161980273	0.00125889541388876	1.50523842649695	0.0141011650386438	0.470120580505742	6.23364064498544	2.64007498931674
10721		0.0116891730172227	0.000357562512645769	1.56378427295429	0.0458992393385616	0.609143466466976	32.6912710472054	5.03083356553342
10739		0.0137277352937256	1.45372681120067e-05	1.75235419606894	0.00155885197442919	0.271536543756176	944.313277292279	9.88312174493167
10764		0.27124748922842	0.0834889960786623	1.69310088222853	0.0048478211148329	0.351143060044428	3.24890107641076	1.69995181669161
10785		0.0144300049754074	0.00159197105884183	1.35731095092414	0.00292800539227416	0.318376889511738	9.06423825688472	3.18018578343429
10795		0.00443321867243276	0.0133730015801731	1.36665594553125	0.012438225686997	0.452735670417213	0.331505133373009	-1.59289688417411
10800		0.0210873715867149	0.00112983311972486	1.44882053346059	7.14376328430328e-05	0.134448827656852	18.6641471369241	4.22219768070799
10823		0.0943425735631426	0.0162104389484188	1.46230160175198	0.0298059345829009	0.545904234988099	5.81986544987079	2.54098579968888
10830		0.0532663210289898	0.0011382348712016	1.51086513926936	0.0408762901103436	0.589820945049004	46.7973020126842	5.54835345193704
10833		0.0285283435359333	1.45372681120067e-05	1.74804593955939	0.0298958770944254	0.546681046645597	1962.4281065829	10.9384240866021
10845		0.0300797187574561	0.0019063609686876	1.66543161216046	0.0266761880953013	0.532146431932306	15.7786060727858	3.97989785405965
10846		0.00445771100825649	0.0137465117728535	1.71846869084555	0.00275841639024493	0.318376889511738	0.324279430441366	-1.62469058062617
10852		0.0869237893839323	0.169195837215912	1.5280597914402	0.0102043512297092	0.41727470706163	0.513746619386434	-0.960871099446762
10927		0.0697304035147603	0.00636640495380481	1.25800322993294	0.0192323122280994	0.507547717915738	10.9528696369034	3.45323699837078
10944		0.0327111836566168	0.0137521308571289	1.4531047268197	0.0189554406112093	0.507547717915738	2.37862655587368	1.2501287865676
10946		0.121538356985103	0.0428464278483999	1.55742023715358	0.0105721052169114	0.422464901568202	2.83660419522328	1.50416485860465
10954		0.00541326932468806	0.0355368318420607	1.70272447884615	0.0412751699533737	0.590481349258339	0.152328416577671	-2.71474299592794
10960		0.00906884639586965	0.00110141115101065	1.65914685668177	0.0315374741441594	0.552344182731403	8.23384290920615	3.04156592421527
10965		0.103443625901745	0.010136450514947	1.23152445251439	0.00976125203160144	0.408268803154472	10.2051132937718	3.35122029366715
10967		0.08516921652963	0.00893292374582078	1.22537220643446	0.0120709775789985	0.44711979457838	9.53430466362997	3.25312772669618
10970		0.923346692928705	0.239753705079417	1.6328697951662	0.00833497978189162	0.399163484610958	3.85123013061614	1.9453193340876
10971		0.101599057365754	0.017585378232841	1.4726581464143	0.0344994569661077	0.565260333367764	5.77747353628233	2.53043874644337
10972		0.0158699874628219	0.00209575690649928	1.59978437035898	0.00361278000209036	0.319647658338795	7.57243715318629	2.92075769954257
10974		0.214122633630064	0.00583224283145111	1.72311340089926	0.0377462942390351	0.578877168449843	36.7136005509546	5.19824270325788
10975		0.378188539531305	0.00967508559076751	1.37471638292088	0.0419368102217233	0.594768423144588	39.0889089283296	5.28868741075897
10976		1.15706545584185	0.0446750551844197	1.63942334519085	0.0399710545188764	0.589227412546464	25.8995864933005	4.69485715925374
10983		0.199660867471402	0.00263276103672725	1.49333028300822	0.0411916726283666	0.59039483022588	75.8370640882766	6.24483120855298
10984		0.040289364666779	0.00745987437761695	1.67007626523541	0.00124148722639963	0.264832955056207	5.40081007096655	2.43317581426053
10985		0.299864158064244	0.0483955346193998	1.72633309332124	0.00325073109225586	0.318376889511738	6.19611210874072	2.63136324762346
10987		0.406303463773152	0.0607894144795988	1.3680303141757	0.0293023013752225	0.545387327386558	6.68378643307231	2.74066563572256
10991		4.22943198406742	0.152979758659018	1.62861884918948	0.0404501423762451	0.589689146727554	27.6470038986959	4.78905123919193
10992		0.180014577721908	0.0279245905936656	1.47961723575629	0.0233193339433604	0.526824107921759	6.44645360576001	2.6885057074412
10994		0.112124833645511	0.0275625952552483	1.63297897985737	0.0205829910011724	0.507985905744258	4.0680071164257	2.02432220299656
10996		0.0939661329985887	0.0143541785532438	1.32246866980404	0.0179290063681836	0.504203988378601	6.5462563845114	2.71067010672423
10997		0.0556224305428628	0.00766620511136825	1.67291997252235	0.0176776159543798	0.504036231444459	7.25553644010646	2.85908228429487
10999		0.483955503366228	0.00820767037426636	1.43464650382999	0.0275703917717111	0.537482451115629	58.9638084009297	5.8817578042541
11001		8.22696754100244	1.75514682823216	1.63289907282373	0.0106465837549801	0.423726665570176	4.68733863667059	2.22876902605169
11002		0.0689001479276878	0.0259853046074506	1.25355411258543	0.0333065795362542	0.561114350053351	2.65150433941546	1.40681110957541
11004		0.146255612460604	0.000870885167987019	1.58884159563249	0.0499481310490595	0.617764164538601	167.939032419925	7.39179377046149
11006		7.98356629774666	0.286143354621266	1.6310318566339	0.0400898049894323	0.589599591058699	27.9005825884496	4.80222334198455
11011		0.151550898134358	0.00382531969971546	1.65490309462089	0.0370572799077005	0.576808441914088	39.6178385157274	5.3080782661873
11013		0.609651294597906	0.0115500488039935	1.58827212005419	0.0294991762519405	0.545387327386558	52.7834388359568	5.72201344005642
11014		2.56722114646817	0.464766854660676	1.63561086570741	0.0259832916226427	0.530972149339522	5.52367519482965	2.46562848820829
11020		1.51758661907842	0.323087599388518	1.65053322928988	0.019232276242588	0.507547717915738	4.69713669590115	2.23178157946521
11027		0.129335667786889	0.0176352813937126	1.42632397386595	0.0198638459082682	0.507985905744258	7.33391573967174	2.87458369083059
11029		0.0244519513249468	0.00167539088644957	1.35124070927702	0.0382013889898344	0.581976657166987	14.5947739854098	3.86737996433301
11031		0.290081573379926	0.0403813061130729	1.43694909665703	0.0188424245588021	0.507547717915738	7.18356094197796	2.84469917549831
11040		0.032060063930505	0.000921426806594004	1.51699788449891	0.0372540826990306	0.577503163089241	34.7939344732252	5.12076392199307
11096		0.0338159577571631	0.000526866040308307	1.74324534445878	0.0105781508999863	0.422464901568202	64.1832176873176	6.00412421272728
11106		0.000725036509403841	0.00461864076095238	1.22270890348481	0.00674551875475596	0.383192790767751	0.156980494247043	-2.67134278800818
11108		0.149492645598458	0.278294929751725	1.69573271644052	0.00658593698358004	0.383192790767751	0.537173443051318	-0.89654011276763
11111		0.00127868332601553	0.0128708240966943	1.32225408417395	0.010288838551784	0.418170392306077	0.0993474323329417	-3.33137350874569
11115		0.015762835538388	0.0351476773193353	1.48539190234595	0.0406535211913236	0.589820945049004	0.448474458075118	-1.15690227308213
11130		0.00451654781202555	0.0250893382386062	1.11551397035246	0.00961492290151097	0.407502010677568	0.180018610657323	-2.47378203213739
11143		0.0136472827174869	0.00574709747577506	1.53526719450227	0.0436322086445184	0.602365018968062	2.37463915916032	1.24770830382638
11155		0.855692303788794	0.0161434128613377	1.66424298030639	0.000806795804951067	0.237942701244799	53.0056631233236	5.72807460028904
11158		0.0192835913412313	0.00581666220881676	1.59448631619894	0.0272175901889625	0.535139696330678	3.31523314384694	1.7291103314674
11165		0.387814587383228	0.00624663016399762	1.63951257321646	0.00131850331536614	0.268479573812009	62.0838079415032	5.95614514355029
11172		0.012444967711781	0.00138050146602577	1.27450979536764	0.020795182787096	0.507985905744258	9.01481673004515	3.1722981621687
11197		0.0280427299841257	0.00932587011312632	1.52035000617969	0.0497545382687491	0.617764164538601	3.00698268836654	1.58831656213219
11204		0.0229760158809054	0.00474311932381369	1.16345092762558	0.0121121071396514	0.44711979457838	4.84407292170581	2.27622058323858
11214		0.0193487833749819	0.00668911724270342	1.44101209727156	0.0261898920000682	0.530972149339522	2.89257650493237	1.53235511726774
11216		0.0215810602413325	0.00542834340856775	1.42930481327833	0.038714233559264	0.584371541205583	3.97562545642753	1.99118184703926
11219		0.0279767098758802	0.0027701475837824	1.72878775231164	0.00855285917530883	0.399261556460509	10.0993571749273	3.33619156310616
11221		0.120108395283622	0.00858621149209935	1.65562564267337	0.000880471802005034	0.244739011386707	13.9885204777614	3.80617147609824
11223		0.0180289540186891	0.00282285133049782	1.44829105399655	0.0327230772898275	0.558211860126131	6.38678835966527	2.6750906444177
11231		0.0424084028857207	0.0133225893991564	1.72536024772109	0.00143787518921168	0.271121974201849	3.18319521942228	1.67047563748151
11232		0.558524914265313	0.0443861168663995	1.21285261017756	0.00923472742559332	0.402839999106982	12.5833245549831	3.65344123215464
11236		0.126582212901334	0.0103972233678578	1.58542545909563	0.0483622011097025	0.617391903164145	12.1746170513806	3.6058044884054
11237		0.0735604224732338	0.01090022110315	1.69993172760711	0.00658356170294142	0.383192790767751	6.74852572045316	2.75457236614882
11238		0.194149576689167	0.000376639624075095	1.63502103587578	0.0148381035445026	0.479404120699071	515.478362548644	9.00976806082316
11239		0.375333416727384	0.00171277540059123	1.58988766780937	0.0109341981904625	0.42744441772645	219.137556855279	7.77569295135305
11243		0.0287488074281693	0.0138849002577969	1.48951904071441	0.0430953303094958	0.599175464380548	2.0705087465087	1.04998529713816
11244		0.368469821852915	0.047464908644047	1.71544365159378	0.00918326156289016	0.402839999106982	7.76299443903235	2.95661325409293
11256		0.0457057503926438	0.00780030540668636	1.74987418867268	0.000284338892443188	0.212520439853905	5.85948216251445	2.5507731706913
11266		0.011623563881468	0.00262660036566462	1.53282996352257	0.0113645170004505	0.432830048142985	4.42532637755374	2.14578386105196
11267		0.0781666943596538	0.117474619307404	1.57061102433847	0.0173258411537142	0.504036231444459	0.665392191270774	-0.587723159356444
11270		0.0433347462724792	0.00514124074811701	1.66188057854296	0.0117684291783249	0.442920185557888	8.42884984297821	3.07533578193391
11285		0.62807214159414	0.0992335828416233	1.70701673567665	0.000688731887449864	0.232896562145433	6.32922971849705	2.66202993110316
11298		0.0236326078602346	0.00304243799655783	1.52288195311992	0.0196624335242152	0.507985905744258	7.76765471867373	2.95747907270248
11300		0.00208948374420134	0.0154141903095407	1.25169341029478	0.0144929687294712	0.474923436827287	0.135555854848116	-2.88304066833715
11312		0.076534059591269	0.221282160568425	1.4452599712184	0.046998589876269	0.613595664877237	0.345866378901353	-1.5317133163594
11315		0.00353654500704659	0.0510495237069417	1.71210423906343	0.0191048693610818	0.507547717915738	0.0692767483463453	-3.85148497412543
11331		0.140595780648563	0.250980917006201	1.532063435995	0.0181842616710475	0.507547717915738	0.560185142064362	-0.836024375941793
11346		0.000146003077115246	0.00477914691720667	1.5834610595314	0.0201310726568957	0.507985905744258	0.0305500290417065	-5.03268243826408
11349		0.0404124363632641	0.0117671312236913	1.04667644868164	0.0256416061943156	0.530972149339522	3.43434908602871	1.78003669020959
11366		0.00446511469415489	1.45372681120067e-05	1.73758547671967	0.0485165401114332	0.617391903164145	307.149504277702	8.2627972446485
11369		0.0547258504470554	0.0202816597266143	1.56782687351726	0.0407565355417943	0.589820945049004	2.69829250587625	1.43204675077068
11372		0.000264221917010989	0.00397230943140779	1.49588407575611	0.0197388152472532	0.507985905744258	0.0665159453394717	-3.91015596187298
11374		3.03786552920314	0.78073660005257	1.63415533554039	0.0105166650534588	0.422464901568202	3.89102487189481	1.96015020221892
11375		0.826091196778504	0.203923055658011	1.63914251129242	0.0165412077753884	0.499234212612315	4.05099459751084	2.01827616101805
11376		0.2039972403513	0.0642659868520251	1.70242879032079	0.00709616279199539	0.383192790767751	3.17426449579015	1.66642234583739
11377		0.416959971533871	0.106857064463611	1.70960511715485	0.00932849548618265	0.402839999106982	3.90203468181426	1.96422660087341
11387		0.00254441782206547	0.0147375604278432	1.16733859102432	0.00342974230608066	0.319647658338795	0.172648508179032	-2.53409022667933
11409		0.0274436897380723	0.00977479201505078	1.60276035234274	0.0209075804261718	0.50912177134196	2.80759833005304	1.48933655078106
11422		0.0130252136994031	0.000376313657959055	1.50500906443597	0.0428187927039884	0.597696303011255	34.6126520361914	5.11322758053634
11433		0.00671747622040562	0.000310756110041843	1.51170496606752	0.000738079514746927	0.232896562145433	21.6165539577037	4.43406464643412
11435		0.0854921221028972	0.0367740411706731	1.55172687182856	0.0458719527589734	0.609143466466976	2.32479540951502	1.21710375937535
11460		0.00884392763326504	0.00324226040794193	1.48474469972308	0.0452881264682088	0.609143466466976	2.72770429284515	1.44768725199792
11479		0.00620696280806512	0.000103252762477392	1.61402597103593	0.0105573153917766	0.422464901568202	60.1142541772111	5.90963521548243
11530		0.00689463312504763	0.000692671447419429	1.27144200728556	0.0177915762446922	0.504036231444459	9.95368460867532	3.31523067466726
11540		0.00341306154349274	0.000112564575017427	1.55322326329914	0.00850786426356915	0.399261556460509	30.3209206179151	4.92224165284021
11553		0.00364061341731679	0.0056759474490809	1.41426578685845	0.0463623526952237	0.612942276667199	0.641410698385924	-0.640679677528761
11559		0.0398368382005571	0.00544481748099916	1.67650954210541	0.0189907829889862	0.507547717915738	7.31646897982828	2.87114755365244
11570		0.0108123491999164	0.00273453542423935	1.40313227992125	0.0407171642328625	0.589820945049004	3.95399858567348	1.98331235502205
11573		0.00152172230472982	0.000107291308621431	1.50327673219128	0.0236312258845134	0.526824107921759	14.1830901708833	3.82609999195749
11585		0.00676854058702803	0.00181650743673924	1.4340316681476	0.0246171030471716	0.527566476585498	3.72612875132405	1.89767752551077
11596		0.22688101180328	0.0200499715041667	1.22350007560976	0.0284204378541677	0.543618155757883	11.3157772696151	3.50026378019969
11598		0.362902558096253	0.0553057305732493	1.38381487816507	0.0430339834461998	0.599175464380548	6.56175326380707	2.71408134640519
11599		11.7923765310868	1.92250112062197	1.48837394542859	0.0396101694987991	0.587108465947406	6.13387238352907	2.61679815135143
11601		0.0522257769400626	0.00555893007983022	1.51345877280597	0.0237057222425421	0.526824107921759	9.39493323176637	3.23188290868718
11602		0.0686238275484274	0.00194647642912787	1.49445501062597	0.0293447670688807	0.545387327386558	35.2554115331233	5.13977281602396
11612		0.015652485943944	0.0437493080923067	1.50361205034714	0.0300329850036659	0.546725610441923	0.357776765541499	-1.48286839482693
11633		0.00812879778573616	0.0294439187797145	1.31624293911415	0.0376064918408835	0.577503163089241	0.276077306371885	-1.8568557920042
11691		0.0379126962953539	0.00306127883675296	1.69740432820838	8.42446700572668e-05	0.134448827656852	12.384594255245	3.63047469859198
11694		1.10703624499222	0.0621262130165236	1.65692615462089	0.011896258783765	0.442920185557888	17.819148974971	4.1553565316963
11695		0.318178070046	0.0174073197366804	1.63787263645775	0.013231191956331	0.459229940240795	18.2784067196479	4.19206841485435
11698		0.00594211596021159	0.00037727129426923	1.42122053776462	0.0246042771662814	0.527566476585498	15.7502467070053	3.97730252160694
11702		2.38825060687976	0.83908112883603	1.61240281195294	0.0030646945148147	0.318376889511738	2.8462690016551	1.50907201780751
11707		0.578930658582797	0.0102281283314247	1.69274162491759	0.036347061654705	0.574418854961509	56.6018180280457	5.82277648748379
11708		12.0603640179961	0.261493257102825	1.69176344889949	0.0357679439185529	0.571392904098883	46.1211281377463	5.52735589709705
11709		0.0420584290059105	0.0124504910239382	1.64588758458897	0.00839842932444136	0.399163484610958	3.3780538394065	1.75619232198944
11710		1.869084825983	0.0387628923820759	1.69821561669839	0.0356466076463785	0.571040781544075	48.2184045390604	5.59151201041375
11711		6.2739205795449	0.138692631596771	1.68974762211562	0.0363306810685194	0.574418854961509	45.2361492266252	5.49940421855411
11712		0.308038938028404	0.00425226483264805	1.68318400371209	0.0375359527742558	0.577503163089241	72.441146107209	6.17873746654964
11715		0.158799191956089	0.0398028700288159	1.67938721234551	0.00551649101238903	0.355066701030347	3.98964174797253	1.9962592046862
11717		23.1850909479255	1.9035014777125	1.69612562231828	0.0166479865646716	0.499234212612315	12.1802327024131	3.60646979097319
11718		6.17865340061366	0.497831955318656	1.69698151352305	0.0169275849974397	0.501806914022039	12.4111225376418	3.63356170239826
11719		0.97608381870658	0.0778377687168422	1.68888989053677	0.0187065717675618	0.507547717915738	12.5399768620986	3.64846278106827
11720		0.0887653602647643	0.0101277359395611	1.71950393485282	0.0047902468409357	0.351143060044428	8.76458082976154	3.13168509505955
11721		2.67213758732618	0.265459247999076	1.68315741969531	0.019605594401974	0.507985905744258	10.0660934115789	3.33143198585352
11722		0.120194800526003	0.0351633676827603	1.13989902231108	0.0166005393194966	0.499234212612315	3.41818228590577	1.77322933556289
11726		0.0979466739125527	0.00965550002678369	1.66020489023391	0.0340423725489075	0.564200819967628	10.1441327368707	3.34257362339257
11728		0.0228415919280838	0.00994198438568311	1.65283159813989	0.00996295622218854	0.412208354200045	2.29748821180777	1.20005745920306
11729		0.0624839831446473	0.000326397111800892	1.66666329586094	0.00262711135790709	0.318376889511738	191.435465834525	7.58071432181229
11764		0.00511657593960943	0.0103833297702927	1.60882414029308	0.0314721985236027	0.552344182731403	0.492768317370428	-1.02101859421565
11767		0.0107822182884689	0.00376512877584605	1.53089080958439	0.0284455651794785	0.543618155757883	2.86370504978173	1.51788290840872
11777		0.016947654903156	0.00141301203367216	1.72544321837875	0.00663602254607687	0.383192790767751	11.9939919118114	3.58423999991779
11795		0.0337532898750807	0.00904571482353281	1.65175332533328	0.0013304934539458	0.268479573812009	3.73141211430523	1.89972170682596
11801		0.0111196616039463	0.000248501812096754	1.63511942332263	2.74804599615781e-06	0.0316080250478072	44.7468028909861	5.48371270199961
11804		0.0159072030710186	0.0029565228259575	1.56537573273744	0.0337343428259068	0.56390592444567	5.38037553147147	2.42770687138489
11805		0.00533458626682386	0.000650025096602807	1.61169626159782	0.0193682179261529	0.507985905744258	8.20673893162546	3.03680905978695
11832		0.00934414896844345	1.45372681120067e-05	1.74804515447563	0.0133708958494411	0.459229940240795	642.772004784441	9.32816328518757
11839		0.0267295425506459	0.00369641959424294	1.67691082541654	0.00180060313014259	0.277807063967268	7.23119815517598	2.85423471070571
11854		0.0411272140174624	0.00558144702626129	1.20437920406806	0.00705312231401972	0.383192790767751	7.36855762026487	2.88138224242144
11859		0.0215863071618899	0.00556780794895862	1.50709367734424	0.023477670542142	0.526824107921759	3.87698486725414	1.95493510393614
11860		0.088954865424745	0.0210837069417916	1.54857803214896	0.0175278517489446	0.504036231444459	4.21912833783612	2.07694497225594
11863		0.00420567282658636	0.000279114193870162	1.49748705213371	0.0364791049009654	0.575559210659676	15.0679288941599	3.91340922519631
11882		0.000345593638388901	0.00116999590828906	1.42297555557975	0.019439925700177	0.507985905744258	0.295380211110547	-1.75935491837499
11918		0.0040359336449967	0.000791087605629745	1.56109405990483	0.00552490064151743	0.355066701030347	5.10175310076296	2.35099308143276
11944		0.0208056678475471	0.000231492775663042	1.69494831383774	0.0330581046087919	0.560817579956231	89.8760999688027	6.4898656172941
11953		0.00826082631468575	0.023708751067087	1.33685516676875	0.0404507682809981	0.589689146727554	0.348429417108926	-1.52106166232383
11957		0.00190447937929858	0.000465726054109805	1.43313331447854	0.0389023723508742	0.584750748012115	4.0892695662879	2.03184316903405
11967		0.00264849202522307	0.000230334420019743	1.41670144868213	0.00457597232322151	0.351143060044428	11.4984639507897	3.52336924313616
12079		0.0104120450391734	0.000629076440979379	1.65750950481733	0.0469178194720338	0.613569835730161	16.5513193006614	4.04887431328916
12081		0.0166199319081986	0.00237183524262775	1.68867320000349	0.00716732030785765	0.385226720471863	7.00720337125335	2.8088387684223
12082		0.0301940688325354	0.00660865989259819	1.59732464122898	0.0449279692212626	0.609143466466976	4.56886408488856	2.19183552572128
12084		0.324600977138727	0.0476055814854466	1.63864409047869	0.0444480713588739	0.60746875791188	6.81854872916446	2.76946470639912
12085		0.0627147278209611	0.0306296472139836	1.5863090120712	0.00325252825919424	0.318376889511738	2.04751714516416	1.03387553252062
12100		0.0557248005533013	0.00138461193718767	1.48208856636435	0.0291595227047366	0.545387327386558	40.2457894928204	5.33076595151656
12116		0.0454606882608234	0.0164843165802759	1.39041436586294	0.0110333051164549	0.42744441772645	2.75781455903478	1.46352545041408
12118		0.0161360828641238	0.00433744946522385	1.08995468798561	0.00841369571704158	0.399163484610958	3.72017772045467	1.89537154345541
12179		0.173087781840152	0.0402988274871129	1.5065199438034	0.0437559086704736	0.602365018968062	4.29510714413474	2.10269412074298
12181		0.012728848422487	0.00304903340771519	1.5388837525048	0.0200712569382193	0.507985905744258	4.17471595761406	2.06167804178263
12187		0.00557999714152317	0.00233249860556191	1.66874369627867	0.00108869448412769	0.264832955056207	2.39228316287843	1.2583881644116
12191		0.14053913292585	0.0311981702406815	1.7032851876799	0.00912905135106568	0.402839999106982	4.50472357326236	2.17143857957506
12235		0.0149484865161243	0.00325861889462737	1.73815863465433	0.00158510552046782	0.271536543756176	4.58736875943688	2.19766688431705
12246		0.0724763197578783	0.0404553942939446	1.57715418540002	0.0274487901821173	0.536020347495268	1.79151188667877	0.841177615859911
12247		0.00304658651841327	7.45402123550363e-05	1.61882947169224	0.00479447761107389	0.351143060044428	40.8717177233454	5.3530309719351
12289		0.00102766553588471	0.00331029412380175	1.57019620979656	0.00299936404776073	0.318376889511738	0.310445385651855	-1.68758860672971
12346		0.00390811824129091	0.0011181625434334	1.29787192758489	0.0359106108546897	0.572229286992245	3.49512534133969	1.80534419410907
12420		0.000979791265885953	0.0146739137596432	1.37933352517896	0.0234054046583636	0.526824107921759	0.0667709570830798	-3.90463547006028
12441		0.0438994889062598	6.60596484806e-05	1.68697843107732	0.0493633181042613	0.617764164538601	664.543180534058	9.37621913542872
12446		0.00946468790484218	4.28158231234175e-05	1.68587351450811	0.0466874248633758	0.613569835730161	221.055843713667	7.78826706288277
12447		0.0305107625336145	6.15218665870677e-05	1.69040515737578	0.0316421156688851	0.552344182731403	495.933628581225	8.95400324562103
12450		0.00907825758537033	1.45372681120067e-05	1.7379746648023	0.0394112173889843	0.586426678406336	624.481678085884	9.28651543443038
12451		0.0574322813078535	0.00327423898800676	1.70458086092173	0.0293179486315588	0.545387327386558	17.5406503673747	4.13263033550874
12452		0.122641777030694	0.00656359626369553	1.67313821563233	0.0320794614970197	0.556017997888663	18.6851494369098	4.22382019679316
12455		0.0404813191576931	0.000354304339307104	1.61868037542818	0.0395684976378405	0.587108465947406	114.255781447274	6.83612335859662
12456		0.00517116519119487	0.000213614204167442	1.57410494972027	0.00330021966984993	0.318376889511738	24.2079650618245	4.59740990538475
12458		0.00556185773286486	0.000124990366288495	1.65231322385905	0.00589445720112257	0.369291124330133	44.4982913325282	5.47567803470987
12463		0.0177592830061435	0.00112900972954674	1.63480545354103	0.00953154017084352	0.406043611277934	15.729964535623	3.97544351298117
12465		0.0122897047192645	0.000394112379045083	1.54137482464352	0.0293678610323501	0.545387327386558	31.1832496838639	4.96269937758941
12468		0.00677248234699725	1.45372681120067e-05	1.73664677124774	0.0443881534950155	0.60746875791188	465.870361254719	8.86378473865639
12470		0.0257944658590691	5.74929641415307e-05	1.68900035777526	0.0401883219779186	0.589599591058699	448.654304821904	8.80946044362654
12471		0.00550515077614787	1.45372681120067e-05	1.73531444917449	0.0409213279559299	0.589820945049004	378.692250409899	8.56488208786634
12474		0.00876058553046038	1.45372681120067e-05	1.7396143156375	0.0381713880136317	0.581976657166987	602.629425485027	9.23512730904775
12477		0.00590776964867597	1.45372681120067e-05	1.73470147940614	0.0454641366050709	0.609143466466976	406.387885478745	8.66671358543736
12479		0.0130375505639503	1.45372681120067e-05	1.74282655574841	0.0322434363233993	0.556017997888663	896.836356287758	9.80870095361488
12487		0.0195625171596404	0.00223191075411175	1.27785012386109	0.00867808982047707	0.399261556460509	8.76491908271925	3.13174077216011
12490		0.00455134912979558	0.000468456023046369	1.4003874839956	0.00630556851290079	0.379044817626432	9.71563798069702	3.28030873398535
12495		0.0137245195852084	0.00302020896445804	1.44214584404977	0.0121284451320166	0.44711979457838	4.54422847780375	2.18403537346666
12521		0.0381997709796873	0.0199023880142817	1.65452726404628	0.0080524026247678	0.399163484610958	1.91935615727498	0.940622444028566
12522		0.00282649957027795	0.00140351043079121	1.44149387172646	0.0207914965285553	0.507985905744258	2.01387856354195	1.00997669175689
12537		0.030653395744453	0.0180534972180972	1.56770517988078	0.00886599712040185	0.401483066452213	1.69792009681788	0.763768568056464
12579		0.0908465390253314	0.0178000917225042	1.67161362877325	0.0189475153121866	0.507547717915738	5.10371184832022	2.35154687794003
12604		0.00752592309647408	0.000807415767487187	1.3031409872842	0.0263962965111985	0.530972149339522	9.3210009013027	3.22048488168363
12608		0.922346940991216	0.201366017157896	1.59726056091039	0.0355457176849969	0.57101514638664	4.58044983959722	2.19548929035001
12609		0.00355429732610171	0.00115174522485153	1.6037104945332	0.0177573414803838	0.504036231444459	3.08601003886072	1.625742755036
12691		0.0178364170661408	0.00536315168931266	1.55069327581182	0.0425517073531853	0.596900509085814	3.32573421364979	1.73367287578958
12700		0.00231681472150211	0.000693414046388603	1.44136862792255	0.0127350053889529	0.454765948366724	3.34117073856291	1.74035370831914
12701		0.0220049934046848	0.00607941133835639	1.70119867419667	0.000193455862033746	0.171163794239396	3.61959278291474	1.85582739810528
12704		0.0472510819871948	0.0190854120249347	1.60817275562506	0.0259671960980639	0.530972149339522	2.47576955244468	1.30787703304252
12705		0.00141886081118041	0.000442618796812192	1.32923665546351	0.0378978169547333	0.580427018126954	3.20560450979321	1.68059644453312
12707		0.0122387135049103	0.00605548493683589	1.37463480880588	0.0262449565467436	0.530972149339522	2.02109552456508	1.01513751051502
12709		0.0021275205740383	0.000475605118057829	1.67445586642277	0.000186377909221699	0.171163794239396	4.47329200898048	2.16133693812286
12710		0.00995238143258598	0.00467690862170926	1.455166604393	0.0126146075233013	0.45296788342756	2.12798287022095	1.08948653751826
12713		0.168522982960008	0.0808915000445022	1.5063636346556	0.0114077719780347	0.433043542215693	2.08332127438971	1.05888533828788
12719		0.000867611935509169	0.000258469174684938	1.21433391795537	0.018687304090266	0.507547717915738	3.35673271896638	1.74705766650425
12723		0.00912763260565417	0.00351488302106243	1.60560543776902	0.0287438834500768	0.545387327386558	2.59685245595889	1.37676404747673
12760		0.00117822115228509	0.00276584190928658	1.62654075130822	0.00940421164297759	0.402839999106982	0.425990056889767	-1.23110833824666
12786		0.0102562747010102	0.0135480919092654	1.4505081039905	0.0367027173199075	0.576808441914088	0.757027245585486	-0.401582870814106
12787		0.00598116104446349	0.00858433571718088	1.48716572535832	0.0265146457528191	0.531309155834364	0.6967529278349	-0.521280935177201
12860		0.000336613360173656	3.85227625639019e-05	1.51341488112478	0.040990330501064	0.590076071868883	8.73803792278081	3.12730936704204
12884		0.00164490180406654	0.00490784819470652	1.30782181714357	0.0423174348126657	0.596489136293237	0.335157433320919	-1.57708916373909
13031		0.00281680021726692	0.000169621336734794	1.47845125489325	0.00545302581285754	0.355066701030347	16.606402658358	4.05366767998591
13041		0.00364959464907048	0.0132936675986885	1.74095130146332	0.00180690045080631	0.277807063967268	0.274536325056792	-1.86493104397342
13112		0.00310053854359308	0.000209499033224878	1.67648794490492	0.0155589844020395	0.490299831759611	14.7997749481972	3.88750333266129
13131		0.000693673086776623	0.000199517998519692	1.42815742624131	0.00605005127767917	0.374127364493902	3.47674441365328	1.79773701394274
13136		0.000150119765087777	1.45372681120067e-05	1.69176469858125	0.0305099099446649	0.550039160162282	10.3265458084102	3.36828585359766
13199		0.00590727419778756	0.00204112164228821	1.63663325506201	0.0218426102884135	0.519077899870521	2.89413138119744	1.53313041554612
13253		0.0130206711699902	6.16998543365557e-05	1.65146568902987	0.0458201862150356	0.609143466466976	211.032445862288	7.72132101755078
13315		0.0738818170658861	0.0239428728682149	1.53840175395775	0.023294892033765	0.526824107921759	3.08575405602086	1.62562307931018
13319		0.00766291309481847	1.45372681120067e-05	1.74129885711416	0.0339672360967666	0.56390592444567	527.121948620422	9.04199295489582
13336		0.00497966022194978	0.000898940710531209	1.63525245002202	0.0206229806353308	0.507985905744258	5.5394757002463	2.46974943467707
13338		0.00260503085294413	4.53552739528844e-05	1.69773031115397	0.0165855880007851	0.499234212612315	57.436117697145	5.84388633067147
13351		0.00279409681077281	0.000882398874466416	1.63813283853288	0.00883415174715059	0.401483066452213	3.16647821254576	1.66287915274893
13403		0.00109580150892763	1.45372681120067e-05	1.75000851362023	0.00163892779060591	0.271536543756176	75.3787782191749	6.23608650608196
13429		0.143715084659368	0.0498031773266169	1.61112187301359	0.0279245297809026	0.541632279156732	2.88566096329281	1.52890180734512
13473		0.00318814960817106	0.00483246348671473	1.65343872366881	0.00312565128271713	0.318376889511738	0.659735891835672	-0.600039500410224
13514		0.00834407379661089	0.00469365783212822	1.44681317650395	0.0198707572635991	0.507985905744258	1.77773371963663	0.830039244229908
13528		0.0334444859980024	0.0174539726973043	1.49790010007091	0.017718540174179	0.504036231444459	1.91615322070304	0.938212927415583
13547		0.00168856082373067	0.000851600665631002	1.5869641516569	0.0242855754608783	0.527367929949365	1.98280824790046	0.987545165121372
13725		0.00191872716238497	0.000877778407969759	1.52903775634212	0.0212686462179443	0.510713922335689	2.18589013464441	1.12822089131775
13739		0.00877494244400926	0.00703388375959395	1.61620957457622	0.00381154716380143	0.327167279686896	1.24752451759536	0.319068169122181
13746		0.00248500619247654	0.00073092270100962	1.52773527536595	0.0301132330410016	0.546725610441923	3.39982078685477	1.76545870026587
13748		0.00896575243418023	0.00682010576498757	1.55628573455808	0.0144434742517919	0.474653830983173	1.31460606963132	0.394630551204674
13758		0.035237629299374	0.00257696501752056	1.46159427443743	0.00544743032541375	0.355066701030347	13.6740813553139	3.77337200880826
13811		0.00379128263329582	0.0155276133663884	1.69281614655873	0.0208017181016819	0.507985905744258	0.244163899746663	-2.03407818492436
13812		0.000995312270705012	0.00439694174280605	1.69765832213325	0.025966405450386	0.530972149339522	0.226364670929168	-2.14327928270914
13844		0.00413916929946674	0.000950516932012442	1.54367335079003	0.0189791790358592	0.507547717915738	4.35465078007948	2.1225570269645
13860		0.00323134389452018	0.0103716968692819	1.40042806752237	0.0458394474656107	0.609143466466976	0.311554023921634	-1.68244574452418
13903		0.00166898694581486	0.00324462378002888	1.59005694369192	0.00828718827570412	0.399163484610958	0.514385352190202	-0.959078534304392
13904		0.000522449932099473	0.000219369964898009	1.17116874138419	0.0368731646122917	0.576808441914088	2.38159281441457	1.25192677389042
13917		0.00218847688873802	0.000278165904021293	1.59402223918179	0.0261075715147795	0.530972149339522	7.86752386651419	2.97590965001552
13980		0.000112151070949629	1.45372681120067e-05	1.72962612507955	0.00452961666508917	0.351143060044428	7.71472811022866	2.94761531286383
14064		0.000109204502277383	0.000420249263232402	1.4873424928694	0.0361087437155594	0.573727132061946	0.259856499063015	-1.94421295333881
14124		0.00070135478753613	0.000946277943912663	1.57342628850109	0.0113490127985423	0.432830048142985	0.741172075337795	-0.432119567988726
14197		0.0126903698310434	0.00477223523933497	1.71526546856596	0.00435859567880876	0.34823135796686	2.65920877630749	1.41099704862072
14198		0.00229749590392429	0.000591109825600349	1.73935708690308	0.00155448369867851	0.271536543756176	3.88674964350472	1.95856418261755
14275		0.00619415309700131	0.00268490725874336	1.59126411980584	0.0173219494293229	0.504036231444459	2.30702683559372	1.20603478570828
14276		0.00103374481709759	0.000303990183103954	1.45393267319274	0.0107530322295805	0.425021913074348	3.40058618519297	1.76578345623886
14417		0.0239743806949672	0.00172220442220032	1.37363824794858	0.047437736577707	0.615290546162136	13.9207520233498	3.79916524508634
14443		0.000493212491513319	4.40264292264439e-05	1.70321347276132	0.0123180137910261	0.449783474998039	11.202645778438	3.48576759508554
14444		0.0120463492153222	0.00415025262543897	1.57556126356609	0.0493736876236123	0.617764164538601	2.90255806152234	1.53732492643022
14448		0.00554882107661013	0.0019659482308437	1.60751794016503	0.0134222075824922	0.459229940240795	2.82246551030941	1.4969559518009
